# Supplementary material for: Compartment-specific remodeling of skeletal muscle in Duchenne muscular dystrophy
Source: Research Square preprint supplement (doi:10.21203/rs.3.rs-8852148/v1), 2026-02-23
Supplement: Supplementary file 1 [file 4d38b38fe8e0720ecd91ffe0.xlsx]

## Sheet: Sections metadata
	Section	Sample	Condition	Replicates	batch	Region	leiden	annotation	Transcript counts	PC1	PC2
0	001	DMD	DMD	DMD-1	batch1	Central	1	Central	58816.1	32.822	32.822
1	002	DMD	DMD	DMD-1	batch1	Central	1	Central	92451.4	39.5321	39.5321
2	003	DMD	DMD	DMD-1	batch1	Central	1	Central	126832	39.5951	39.5951
3	004	DMD	DMD	DMD-1	batch1	Central	1	Central	220891	27.1606	27.1606
4	005	DMD	DMD	DMD-1	batch1	Central	1	Central	314451	30.6936	30.6936
5	006	DMD	DMD	DMD-1	batch1	Central	1	Central	494140	29.4054	29.4054
6	007	DMD	DMD	DMD-1	batch1	Central	1	Central	424911	24.3535	24.3535
7	008	DMD	DMD	DMD-1	batch1	Central	1	Central	474594	31.5974	31.5974
8	009	DMD	DMD	DMD-1	batch1	Central	1	Central	453136	30.9854	30.9854
9	010	DMD	DMD	DMD-1	batch1	Central	1	Central	429330	24.4576	24.4576
10	011	DMD	DMD	DMD-1	batch1	Central	1	Central	437162	28.8198	28.8198
11	012	DMD	DMD	DMD-1	batch1	Central	1	Central	552362	43.0768	43.0768
12	013	DMD	DMD	DMD-1	batch1	Central	1	Central	575364	30.1095	30.1095
13	014	DMD	DMD	DMD-1	batch1	Central	1	Central	560437	32.4724	32.4724
14	015	DMD	DMD	DMD-1	batch1	Central	1	Central	776991	26.8474	26.8474
15	016	DMD	DMD	DMD-1	batch1	Central	1	Central	579506	14.6271	14.6271
16	017	DMD	DMD	DMD-1	batch1	Central	1	Central	796466	29.0474	29.0474
17	018	DMD	DMD	DMD-1	batch1	Central	0	Proximal-distal	768282	13.5218	13.5218
18	019	DMD	DMD	DMD-1	batch1	Central	0	Proximal-distal	626983	8.43323	8.43323
19	020	DMD	DMD	DMD-1	batch1	Central	1	Central	759814	22.0252	22.0252
20	021	DMD	DMD	DMD-1	batch1	Central	1	Central	460715	14.7117	14.7117
21	022	DMD	DMD	DMD-1	batch1	Central	1	Central	704598	4.86539	4.86539
22	023	DMD	DMD	DMD-1	batch1	Central	0	Proximal-distal	671039	3.05611	3.05611
23	024	DMD	DMD	DMD-1	batch1	Central	0	Proximal-distal	818312	5.47785	5.47785
24	025	DMD	DMD	DMD-1	batch1	Central	0	Proximal-distal	676546	7.06261	7.06261
25	026	DMD	DMD	DMD-1	batch1	Central	0	Proximal-distal	634155	16.8545	16.8545
26	027	DMD	DMD	DMD-1	batch1	Central	0	Proximal-distal	508759	12.742	12.742
27	028	DMD	DMD	DMD-1	batch1	Central	0	Proximal-distal	585207	12.1755	12.1755
28	029	DMD	DMD	DMD-1	batch1	Central	0	Proximal-distal	820157	2.59997	2.59997
29	030	DMD	DMD	DMD-1	batch1	Central	0	Proximal-distal	624213	1.81902	1.81902
30	031	DMD	DMD	DMD-1	batch1	Central	0	Proximal-distal	642608	6.21666	6.21666
31	032	DMD	DMD	DMD-1	batch1	Central	0	Proximal-distal	375543	4.77778	4.77778
32	033	DMD	DMD	DMD-1	batch1	Central	0	Proximal-distal	418245	3.14341	3.14341
33	034	DMD	DMD	DMD-1	batch1	Central	0	Proximal-distal	656659	-2.85697	-2.85697
34	035	DMD	DMD	DMD-1	batch1	Central	1	Central	624809	23.9075	23.9075
35	036	DMD	DMD	DMD-1	batch1	Central	0	Proximal-distal	732257	4.76191	4.76191
36	037	DMD	DMD	DMD-1	batch1	Central	0	Proximal-distal	415017	13.0887	13.0887
37	038	DMD	DMD	DMD-1	batch1	Central	0	Proximal-distal	735355	9.16509	9.16509
38	039	DMD	DMD	DMD-1	batch1	Central	1	Central	898526	15.8865	15.8865
39	040	DMD	DMD	DMD-1	batch1	Central	0	Proximal-distal	899164	3.29234	3.29234
40	041	DMD	DMD	DMD-1	batch1	Central	0	Proximal-distal	753343	10.6157	10.6157
41	042	DMD	DMD	DMD-1	batch1	Central	0	Proximal-distal	778258	2.72764	2.72764
42	043	DMD	DMD	DMD-1	batch1	Central	0	Proximal-distal	451485	4.21357	4.21357
43	044	DMD	DMD	DMD-1	batch1	Central	0	Proximal-distal	361579	-2.09801	-2.09801
44	045	DMD	DMD	DMD-1	batch1	Central	1	Central	342326	5.0748	5.0748
45	046	DMD	DMD	DMD-1	batch1	Distal	0	Proximal-distal	699578	-3.07134	-3.07134
46	047	DMD	DMD	DMD-1	batch1	Distal	0	Proximal-distal	355623	1.84288	1.84288
47	048	DMD	DMD	DMD-1	batch1	Distal	0	Proximal-distal	459814	-10.6192	-10.6192
48	049	DMD	DMD	DMD-1	batch1	Distal	0	Proximal-distal	749172	-4.74507	-4.74507
49	050	DMD	DMD	DMD-1	batch1	Distal	0	Proximal-distal	711503	-3.19094	-3.19094
50	051	DMD	DMD	DMD-1	batch1	Distal	0	Proximal-distal	680818	-7.88751	-7.88751
51	052	DMD	DMD	DMD-1	batch1	Distal	0	Proximal-distal	469513	-20.2987	-20.2987
52	053	DMD	DMD	DMD-1	batch1	Distal	0	Proximal-distal	362322	-10.2557	-10.2557
53	054	DMD	DMD	DMD-1	batch1	Distal	0	Proximal-distal	355185	-11.606	-11.606
54	055	DMD	DMD	DMD-1	batch1	Distal	0	Proximal-distal	660558	-16.4886	-16.4886
55	056	DMD	DMD	DMD-1	batch1	Distal	0	Proximal-distal	687386	-20.4263	-20.4263
56	057	DMD	DMD	DMD-1	batch1	Distal	0	Proximal-distal	660448	-11.691	-11.691
57	058	DMD	DMD	DMD-1	batch1	Distal	0	Proximal-distal	519146	-34.4185	-34.4185
58	059	DMD	DMD	DMD-1	batch1	Distal	2	Proximal-distal	437343	-48.8021	-48.8021
59	060	DMD	DMD	DMD-1	batch1	Distal	2	Proximal-distal	343421	-58.619	-58.619
60	061	DMD	DMD	DMD-1	batch1	Distal	2	Proximal-distal	425507	-60.0385	-60.0385
61	062	DMD	DMD	DMD-1	batch1	Distal	2	Proximal-distal	505478	-57.888	-57.888
62	063	DMD	DMD	DMD-1	batch1	Distal	2	Proximal-distal	296569	-74.5523	-74.5523
63	064	DMD	DMD	DMD-1	batch1	Distal	2	Proximal-distal	370481	-71.7617	-71.7617
64	065	DMD	DMD	DMD-1	batch1	Distal	2	Proximal-distal	288420	-61.5315	-61.5315
65	066	DMD	DMD	DMD-1	batch1	Distal	2	Proximal-distal	262908	-86.9559	-86.9559
66	067	DMD	DMD	DMD-1	batch1	Distal	2	Proximal-distal	171732	-69.86	-69.86
67	001	DMD	DMD	DMD-2	batch2	Proximal	0	Proximal-distal	34398.9	-6.8675	-6.8675
68	002	DMD	DMD	DMD-2	batch2	Proximal	0	Proximal-distal	27981.8	-8.29807	-8.29807
69	003	DMD	DMD	DMD-2	batch2	Proximal	0	Proximal-distal	44531.2	-1.97782	-1.97782
70	004	DMD	DMD	DMD-2	batch2	Proximal	0	Proximal-distal	102781	-6.2113	-6.2113
71	005	DMD	DMD	DMD-2	batch2	Proximal	0	Proximal-distal	173347	-6.1349	-6.1349
72	006	DMD	DMD	DMD-2	batch2	Proximal	0	Proximal-distal	95294.1	-8.09534	-8.09534
73	007	DMD	DMD	DMD-2	batch2	Proximal	0	Proximal-distal	137229	2.33882	2.33882
74	008	DMD	DMD	DMD-2	batch2	Proximal	0	Proximal-distal	141323	-2.18337	-2.18337
75	009	DMD	DMD	DMD-2	batch2	Proximal	0	Proximal-distal	228773	5.11492	5.11492
76	010	DMD	DMD	DMD-2	batch2	Proximal	1	Central	110272	10.8566	10.8566
77	011	DMD	DMD	DMD-2	batch2	Proximal	0	Proximal-distal	310431	6.01721	6.01721
78	012	DMD	DMD	DMD-2	batch2	Proximal	0	Proximal-distal	210415	9.1676	9.1676
79	013	DMD	DMD	DMD-2	batch2	Proximal	0	Proximal-distal	179358	2.00232	2.00232
80	014	DMD	DMD	DMD-2	batch2	Proximal	0	Proximal-distal	140478	-2.09211	-2.09211
81	015	DMD	DMD	DMD-2	batch2	Proximal	0	Proximal-distal	229298	-1.77662	-1.77662
82	016	DMD	DMD	DMD-2	batch2	Proximal	0	Proximal-distal	132180	1.94842	1.94842
83	017	DMD	DMD	DMD-2	batch2	Proximal	0	Proximal-distal	75228.4	-2.53548	-2.53548
84	018	DMD	DMD	DMD-2	batch2	Proximal	0	Proximal-distal	85471.4	1.10395	1.10395
85	019	DMD	DMD	DMD-2	batch2	Proximal	1	Central	226082	7.46005	7.46005
86	020	DMD	DMD	DMD-2	batch2	Proximal	0	Proximal-distal	80616.9	-2.60191	-2.60191
87	021	DMD	DMD	DMD-2	batch2	Proximal	0	Proximal-distal	285757	5.23933	5.23933
88	022	DMD	DMD	DMD-2	batch2	Central	1	Central	222974	17.1982	17.1982
89	023	DMD	DMD	DMD-2	batch2	Central	1	Central	125898	8.59821	8.59821
90	024	DMD	DMD	DMD-2	batch2	Central	1	Central	148248	12.0947	12.0947
91	025	DMD	DMD	DMD-2	batch2	Central	1	Central	81947.5	3.60264	3.60264
92	026	DMD	DMD	DMD-2	batch2	Central	1	Central	99762.8	11.674	11.674
93	027	DMD	DMD	DMD-2	batch2	Central	1	Central	108240	13.3035	13.3035
94	028	DMD	DMD	DMD-2	batch2	Central	1	Central	202132	6.75378	6.75378
95	029	DMD	DMD	DMD-2	batch2	Central	1	Central	81160	5.9533	5.9533
96	030	DMD	DMD	DMD-2	batch2	Central	1	Central	76990	15.8173	15.8173
97	031	DMD	DMD	DMD-2	batch2	Central	1	Central	71928.5	14.4089	14.4089
98	032	DMD	DMD	DMD-2	batch2	Central	1	Central	159668	6.77429	6.77429
99	033	DMD	DMD	DMD-2	batch2	Central	1	Central	167996	13.0027	13.0027
100	034	DMD	DMD	DMD-2	batch2	Central	1	Central	102555	4.9896	4.9896
101	035	DMD	DMD	DMD-2	batch2	Central	1	Central	93426.8	8.64896	8.64896
102	036	DMD	DMD	DMD-2	batch2	Central	1	Central	157405	16.5566	16.5566
103	037	DMD	DMD	DMD-2	batch2	Central	1	Central	192728	6.11004	6.11004
104	038	DMD	DMD	DMD-2	batch2	Central	1	Central	179477	0.373076	0.373076
105	039	DMD	DMD	DMD-2	batch2	Central	1	Central	248708	4.18066	4.18066
106	040	DMD	DMD	DMD-2	batch2	Central	1	Central	197561	3.364	3.364
107	041	DMD	DMD	DMD-2	batch2	Central	1	Central	212633	5.42396	5.42396
108	042	DMD	DMD	DMD-2	batch2	Central	1	Central	246591	9.80933	9.80933
109	043	DMD	DMD	DMD-2	batch2	Central	1	Central	57747.6	-2.25575	-2.25575
110	044	DMD	DMD	DMD-2	batch2	Central	1	Central	194272	1.27707	1.27707
111	045	DMD	DMD	DMD-2	batch2	Central	0	Proximal-distal	41925	-5.56394	-5.56394
112	046	DMD	DMD	DMD-2	batch2	Central	0	Proximal-distal	79270.6	-6.76857	-6.76857
113	047	DMD	DMD	DMD-2	batch2	Distal	0	Proximal-distal	216637	-8.72372	-8.72372
114	048	DMD	DMD	DMD-2	batch2	Distal	0	Proximal-distal	63875.3	-14.2835	-14.2835
115	049	DMD	DMD	DMD-2	batch2	Distal	0	Proximal-distal	141148	-8.26802	-8.26802
116	050	DMD	DMD	DMD-2	batch2	Distal	0	Proximal-distal	59596.2	-20.6739	-20.6739
117	051	DMD	DMD	DMD-2	batch2	Distal	0	Proximal-distal	272190	-5.89998	-5.89998
118	052	DMD	DMD	DMD-2	batch2	Distal	0	Proximal-distal	164260	-10.1199	-10.1199
119	053	DMD	DMD	DMD-2	batch2	Distal	0	Proximal-distal	217114	-2.7685	-2.7685
120	054	DMD	DMD	DMD-2	batch2	Distal	0	Proximal-distal	200883	-8.18489	-8.18489
121	055	DMD	DMD	DMD-2	batch2	Distal	0	Proximal-distal	139946	3.52507	3.52507
122	056	DMD	DMD	DMD-2	batch2	Distal	0	Proximal-distal	279293	-5.79735	-5.79735
123	057	DMD	DMD	DMD-2	batch2	Distal	0	Proximal-distal	195006	-4.49487	-4.49487
124	058	DMD	DMD	DMD-2	batch2	Distal	0	Proximal-distal	80191.9	-17.0997	-17.0997
125	059	DMD	DMD	DMD-2	batch2	Distal	0	Proximal-distal	200115	-6.42171	-6.42171
126	060	DMD	DMD	DMD-2	batch2	Distal	0	Proximal-distal	93595.1	-7.83493	-7.83493
127	061	DMD	DMD	DMD-2	batch2	Distal	0	Proximal-distal	46257.5	0.846583	0.846583
128	062	DMD	DMD	DMD-2	batch2	Distal	0	Proximal-distal	101712	-4.48533	-4.48533
129	063	DMD	DMD	DMD-2	batch2	Distal	0	Proximal-distal	27320.3	-6.8021	-6.8021
130	064	DMD	DMD	DMD-2	batch2	Distal	0	Proximal-distal	31290.8	-14.4313	-14.4313
131	065	DMD	DMD	DMD-2	batch2	Distal	0	Proximal-distal	97855.2	-16.1123	-16.1123
132	066	DMD	DMD	DMD-2	batch2	Distal	0	Proximal-distal	122411	-19.7708	-19.7708
133	001	DMD	DMD	DMD-3	batch2	Proximal	1	Central	109026	16.1373	16.1373
134	002	DMD	DMD	DMD-3	batch2	Proximal	1	Central	201365	18.0736	18.0736
135	003	DMD	DMD	DMD-3	batch2	Proximal	0	Proximal-distal	232766	8.99983	8.99983
136	004	DMD	DMD	DMD-3	batch2	Proximal	1	Central	215853	16.0534	16.0534
137	005	DMD	DMD	DMD-3	batch2	Proximal	1	Central	199779	13.1177	13.1177
138	006	DMD	DMD	DMD-3	batch2	Central	0	Proximal-distal	408955	-4.5541	-4.5541
139	007	DMD	DMD	DMD-3	batch2	Central	0	Proximal-distal	419343	-0.288706	-0.288706
140	008	DMD	DMD	DMD-3	batch2	Central	0	Proximal-distal	343853	6.88545	6.88545
141	009	DMD	DMD	DMD-3	batch2	Central	0	Proximal-distal	334097	5.16326	5.16326
142	010	DMD	DMD	DMD-3	batch2	Central	1	Central	309494	6.83833	6.83833
143	011	DMD	DMD	DMD-3	batch2	Central	1	Central	419614	6.4906	6.4906
144	012	DMD	DMD	DMD-3	batch2	Central	0	Proximal-distal	271208	-0.257937	-0.257937
145	013	DMD	DMD	DMD-3	batch2	Central	1	Central	490548	10.3182	10.3182
146	014	DMD	DMD	DMD-3	batch2	Central	1	Central	497880	12.3967	12.3967
147	015	DMD	DMD	DMD-3	batch2	Central	1	Central	237824	6.62346	6.62346
148	016	DMD	DMD	DMD-3	batch2	Central	1	Central	162373	17.2159	17.2159
149	017	DMD	DMD	DMD-3	batch2	Central	0	Proximal-distal	460660	-3.09448	-3.09448
150	018	DMD	DMD	DMD-3	batch2	Central	1	Central	501489	7.36861	7.36861
151	019	DMD	DMD	DMD-3	batch2	Central	1	Central	442523	13.8044	13.8044
152	020	DMD	DMD	DMD-3	batch2	Central	0	Proximal-distal	917997	-7.91458	-7.91458
153	021	DMD	DMD	DMD-3	batch2	Central	0	Proximal-distal	215521	-10.5224	-10.5224
154	022	DMD	DMD	DMD-3	batch2	Central	0	Proximal-distal	311046	-10.7107	-10.7107
155	023	DMD	DMD	DMD-3	batch2	Central	0	Proximal-distal	284929	-14.0034	-14.0034
156	024	DMD	DMD	DMD-3	batch2	Central	0	Proximal-distal	427668	-8.25303	-8.25303
157	025	DMD	DMD	DMD-3	batch2	Central	0	Proximal-distal	481004	-14.992	-14.992
158	026	DMD	DMD	DMD-3	batch2	Central	0	Proximal-distal	469743	-4.26941	-4.26941
159	027	DMD	DMD	DMD-3	batch2	Central	0	Proximal-distal	464186	-7.75987	-7.75987
160	028	DMD	DMD	DMD-3	batch2	Central	0	Proximal-distal	354542	-3.82243	-3.82243
161	029	DMD	DMD	DMD-3	batch2	Central	0	Proximal-distal	367364	-9.25151	-9.25151
162	030	DMD	DMD	DMD-3	batch2	Central	0	Proximal-distal	444965	1.00542	1.00542
163	031	DMD	DMD	DMD-3	batch2	Central	0	Proximal-distal	484584	-9.75701	-9.75701
164	032	DMD	DMD	DMD-3	batch2	Central	0	Proximal-distal	248684	-23.6487	-23.6487
165	033	DMD	DMD	DMD-3	batch2	Central	0	Proximal-distal	209078	-2.69336	-2.69336
166	034	DMD	DMD	DMD-3	batch2	Central	0	Proximal-distal	154096	-13.2519	-13.2519
167	035	DMD	DMD	DMD-3	batch2	Central	0	Proximal-distal	402842	-9.63172	-9.63172
168	036	DMD	DMD	DMD-3	batch2	Central	0	Proximal-distal	452038	-4.8769	-4.8769
169	037	DMD	DMD	DMD-3	batch2	Central	0	Proximal-distal	474200	-5.67368	-5.67368
170	038	DMD	DMD	DMD-3	batch2	Central	0	Proximal-distal	206507	-5.33882	-5.33882
171	039	DMD	DMD	DMD-3	batch2	Central	0	Proximal-distal	186465	0.996195	0.996195
172	040	DMD	DMD	DMD-3	batch2	Central	0	Proximal-distal	533519	-17.9885	-17.9885
173	041	DMD	DMD	DMD-3	batch2	Central	0	Proximal-distal	790286	-21.5955	-21.5955
174	042	DMD	DMD	DMD-3	batch2	Central	0	Proximal-distal	318724	-23.4949	-23.4949
175	043	DMD	DMD	DMD-3	batch2	Central	0	Proximal-distal	436299	4.05557	4.05557
176	044	DMD	DMD	DMD-3	batch2	Central	0	Proximal-distal	273918	0.200416	0.200416
177	045	DMD	DMD	DMD-3	batch2	Central	0	Proximal-distal	306183	-9.59103	-9.59103
178	046	DMD	DMD	DMD-3	batch2	Central	0	Proximal-distal	181620	-16.8269	-16.8269
179	047	DMD	DMD	DMD-3	batch2	Central	1	Central	303870	2.72697	2.72697
180	048	DMD	DMD	DMD-3	batch2	Central	1	Central	276986	-1.42177	-1.42177
181	049	DMD	DMD	DMD-3	batch2	Distal	0	Proximal-distal	417166	-13.2364	-13.2364
182	050	DMD	DMD	DMD-3	batch2	Distal	1	Central	411240	6.56985	6.56985
183	051	DMD	DMD	DMD-3	batch2	Distal	1	Central	289709	9.11789	9.11789
184	052	DMD	DMD	DMD-3	batch2	Distal	1	Central	208574	-0.925053	-0.925053
185	053	DMD	DMD	DMD-3	batch2	Distal	1	Central	129772	23.888	23.888
186	054	DMD	DMD	DMD-3	batch2	Distal	1	Central	117420	13.2043	13.2043
187	055	DMD	DMD	DMD-3	batch2	Distal	1	Central	200446	-9.20845	-9.20845
188	056	DMD	DMD	DMD-3	batch2	Distal	1	Central	118847	15.7774	15.7774
189	057	DMD	DMD	DMD-3	batch2	Distal	1	Central	117161	28.6062	28.6062
190	058	DMD	DMD	DMD-3	batch2	Distal	1	Central	208324	17.2201	17.2201

## Sheet: DEG
	Central_mean-zscore	Proximal-distal_mean-zscore	Mean z-score difference	p_value	adj_p_value
Mrpl15	0.06111	-0.146846	0.207956	0.189481	0.35377
Lypla1	-0.0419887	0.100898	-0.142887	0.370134	0.547155
Rb1cc1	0.00995087	-0.0239118	0.0338627	0.8184	0.895472
Pcmtd1	-0.0677649	0.162838	-0.230603	0.156809	0.312844
Cops5	-0.0757906	0.182124	-0.257914	0.0988301	0.226881
Arfgef1	-0.0120503	0.0289568	-0.0410071	0.793266	0.879591
Slco5a1	-0.067844	0.163028	-0.230872	0.148699	0.301369
Tram1	-0.0040844	0.00981475	-0.0138991	0.928432	0.959649
Eya1	-0.046831	0.112534	-0.159365	0.350925	0.53038
Stau2	-0.00968837	0.023281	-0.0329694	0.835529	0.904679
Eloc	-0.0826404	0.198584	-0.281224	0.0692309	0.176492
Tmem70	-0.00503594	0.0121013	-0.0171372	0.916014	0.954428
Jph1	-0.19892	0.478001	-0.676921	9.73778e-06	0.000135573
Sdhaf4	0.142659	-0.342808	0.485467	0.000755624	0.00559786
Lmbrd1	-0.0339844	0.0816641	-0.115648	0.451727	0.624071
Ptp4a1	-0.0138138	0.0331942	-0.047008	0.751623	0.853176
Dst	-0.094389	0.226815	-0.321204	0.029519	0.0957292
Plekhb2	0.0785588	-0.188776	0.267335	0.0760811	0.189323
Ankrd23	-0.00591082	0.0142036	-0.0201144	0.890181	0.938103
Cox5b	0.0656706	-0.157805	0.223476	0.0882037	0.209016
Actr1b	0.00074663	-0.00179414	0.00254077	0.987905	0.992235
Coa5	-0.0447082	0.107433	-0.152141	0.307817	0.484763
Mrpl30	0.0341788	-0.0821312	0.11631	0.439137	0.611648
Txndc9	-0.0746815	0.179458	-0.25414	0.108506	0.241449
Eif5b	0.0252781	-0.0607429	0.086021	0.567692	0.721641
Pdcl3	-0.125646	0.301925	-0.427571	0.0104785	0.0444145
Cnot11	-0.00109645	0.00263475	-0.00373119	0.981474	0.990057
Slc9a2	0.0104077	-0.0250094	0.0354171	0.820832	0.897272
Tmem182	-0.13708	0.329402	-0.466482	0.00450355	0.0238076
Tpp2	-0.107977	0.259468	-0.367445	0.00941248	0.0410288
Mettl21c	-0.20689	0.497154	-0.704044	1.40547e-05	0.000185292
Col3a1	-0.0239738	0.0576087	-0.0815825	0.639879	0.772263
Slc40a1	0.108978	-0.261872	0.370849	0.0101436	0.0434534
Cavin2	0.0799132	-0.19203	0.271944	0.0650502	0.169719
Gls	-0.0710525	0.170738	-0.241791	0.105116	0.237082
Mstn	-0.108424	0.260542	-0.368966	0.0238152	0.0824469
Asnsd1	-0.0244458	0.0587428	-0.0831886	0.568249	0.722047
Sf3b1	0.0388186	-0.0932804	0.132099	0.420618	0.594948
Hspd1	0.124993	-0.300356	0.425348	0.00679573	0.0319508
Hspe1	0.144012	-0.346059	0.490071	0.000814562	0.00593913
Mob4	-0.0904526	0.217356	-0.307809	0.0503289	0.141113
Maip1	-0.0803054	0.192973	-0.273278	0.103216	0.234211
Bzw1	0.0131767	-0.0316635	0.0448402	0.767404	0.862162
Clk1	-0.0448645	0.107809	-0.152673	0.317946	0.495162
Ndufb3	0.087372	-0.209954	0.297326	0.0734227	0.185133
Cflar	-0.032477	0.0780418	-0.110519	0.49274	0.662043
Trak2	0.065285	-0.156879	0.222164	0.134596	0.279901
Stradb	0.00506055	-0.0121604	0.017221	0.913678	0.953223
Sumo1	-0.104932	0.25215	-0.357081	0.021805	0.077057
Bmpr2	-0.0782283	0.187981	-0.26621	0.104888	0.236915
Wdr12	-0.0689509	0.165688	-0.234639	0.105	0.237002
Ndufs1	0.018196	-0.0437247	0.0619207	0.662126	0.788013
Eef1b2	0.0603616	-0.145048	0.20541	0.149448	0.302453
Idh1	0.0463478	-0.111373	0.157721	0.273429	0.45083
Acadl	0.329232	-0.791139	1.12037	1.19562e-16	9.41918e-15
Myl1	-0.44482	1.0689	-1.51372	2.28468e-25	3.35432e-23
Igfbp5	-0.192438	0.462427	-0.654865	2.47145e-05	0.000301237
Tns1	-0.0330012	0.0793014	-0.112303	0.437848	0.610643
Arpc2	-0.073761	0.177247	-0.251008	0.115894	0.251891
Aamp	-0.162176	0.389707	-0.551883	0.00145235	0.00963264
Pnkd	0.0108565	-0.026088	0.0369445	0.802261	0.884404
Ctdsp1	-0.0298399	0.0717048	-0.101545	0.521088	0.682806
Cyp27a1	-0.0853676	0.205137	-0.290505	0.0710889	0.18027
Tuba4a	-0.164389	0.395025	-0.559415	3.58909e-05	0.000414027
Dnpep	-0.0184052	0.0442274	-0.0626326	0.658643	0.784946
Des	-0.235061	0.564848	-0.79991	7.09906e-08	1.47935e-06
Speg	-0.0919942	0.221061	-0.313055	0.0403601	0.12004
Gmppa	-0.137311	0.329957	-0.467268	0.00453478	0.0239336
Farsb	0.000958719	-0.00230379	0.00326251	0.983139	0.990371
Serpine2	-0.082998	0.199443	-0.282441	0.0665581	0.171907
Cul3	-0.195797	0.470496	-0.666293	1.05767e-05	0.000146621
Irs1	-0.147498	0.354436	-0.501935	0.00123823	0.00854588
Mff	-0.0494637	0.11886	-0.168324	0.285168	0.463688
Trip12	-0.0565631	0.13592	-0.192483	0.221625	0.390535
Sp100	0.0385586	-0.0926556	0.131214	0.408018	0.582883
Cab39	-0.0801244	0.192538	-0.272662	0.0857734	0.205221
Psmd1	-0.162151	0.389647	-0.551799	0.000162403	0.00152489
Ncl	-0.0967638	0.232522	-0.329286	0.0535364	0.147797
Pde6d	-0.0869181	0.208863	-0.295781	0.0593548	0.159192
Eif4e2	0.0111633	-0.0268251	0.0379884	0.812053	0.889733
Dgkd	-0.0923176	0.221838	-0.314155	0.0335862	0.105324
Cops8	-0.0806017	0.193685	-0.274286	0.0815383	0.198171
Lrrfip1	-0.0538084	0.129301	-0.183109	0.251801	0.425597
Ube2f	-0.0436061	0.104785	-0.148391	0.320385	0.497521
Klhl30	-0.069098	0.166041	-0.235139	0.111848	0.246937
Ilkap	-0.0128858	0.0309644	-0.0438502	0.784636	0.873621
Hdac4	-0.0424707	0.102056	-0.144527	0.345007	0.523918
Ndufa10	0.056998	-0.136965	0.193963	0.17852	0.3416
Cops9	-0.00698182	0.0167772	-0.023759	0.880672	0.933433
Gpc1	-0.100613	0.241773	-0.342386	0.0160594	0.0613143
Dusp28	-0.0925212	0.222327	-0.314848	0.0422821	0.12393
Ppp1r7	-0.0653328	0.156994	-0.222326	0.169028	0.329885
Hdlbp	-0.0816601	0.196228	-0.277888	0.0699101	0.177728
Septin2	-0.0524098	0.12594	-0.17835	0.275448	0.451637
Fam174a	-0.0929594	0.22338	-0.31634	0.0381326	0.11576
Tsn	-0.134678	0.323628	-0.458306	0.00301317	0.0175046
Tmem37	-0.244247	0.586921	-0.831168	9.38804e-07	1.60441e-05
Dbi	-0.00221536	0.00532348	-0.00753885	0.960063	0.97947
Insig2	-0.000176024	0.000422982	-0.000599005	0.996915	0.997842
Actr3	-0.134636	0.323527	-0.458163	0.00906856	0.0400704
R3hdm1	0.0309871	-0.0744615	0.105449	0.504618	0.670798
Ubxn4	-0.171116	0.411188	-0.582304	0.000339986	0.00284496
Mapkapk2	-0.00814256	0.0195665	-0.027709	0.857215	0.918778
Nucks1	-0.0826214	0.198538	-0.281159	0.0852438	0.204256
Elk4	-0.0936869	0.225128	-0.318815	0.058421	0.15725
Rbbp5	-0.0268174	0.0644419	-0.0912594	0.5549	0.711306
Snrpe	0.0252255	-0.0606164	0.0858418	0.58174	0.731388
Zc3h11a	-0.108077	0.259708	-0.367785	0.0232745	0.0809222
Prelp	-0.236919	0.569312	-0.806231	1.89432e-07	3.66386e-06
Cyb5r1	-0.0307592	0.0739139	-0.104673	0.494246	0.662647
Adipor1	-0.0274164	0.0658813	-0.0932977	0.519537	0.681892
Klhl12	0.00274411	-0.00659405	0.00933816	0.954489	0.976251
Ppp1r12b	-0.0344488	0.0827799	-0.117229	0.458698	0.631272
Timm17a	-0.0749563	0.180119	-0.255075	0.116631	0.253171
Shisa4	-0.117744	0.282937	-0.400682	0.0089628	0.0396846
Phlda3	-0.175268	0.421167	-0.596435	7.13386e-05	0.000757973
Cacna1s	0.007574	-0.0182002	0.0257742	0.870215	0.925822
Nek7	-0.120248	0.288955	-0.409203	0.00690121	0.0322852
Cdc73	-0.159195	0.382543	-0.541738	0.000448772	0.00357909
Glrx2	-0.0242011	0.058155	-0.0823561	0.597789	0.741632
Tpr	-0.044545	0.107041	-0.151586	0.311695	0.489201
Ivns1abp	-0.0189712	0.0455875	-0.0645586	0.669567	0.794818
1700025G04Rik	-0.17943	0.431167	-0.610597	0.000143105	0.00137568
Arpc5	-0.0328953	0.0790468	-0.111942	0.437836	0.610643
Smg7	-0.0496901	0.119405	-0.169095	0.284947	0.463688
Lamc1	-0.097915	0.235288	-0.333203	0.0226331	0.079287
Glul	-0.0715873	0.172023	-0.243611	0.117672	0.254917
Xpr1	-0.0949018	0.228048	-0.32295	0.037642	0.11481
Acbd6	0.0341224	-0.0819956	0.116118	0.477817	0.648371
Tor1aip1	-0.109265	0.262562	-0.371827	0.0181302	0.0670029
Tor1aip2	-0.129483	0.311146	-0.440629	0.00531449	0.026738
Fam20b	-0.0791352	0.190161	-0.269296	0.0925352	0.215493
Cop1	-0.125057	0.300511	-0.425569	0.0109465	0.0457404
Mrps14	0.0061709	-0.0148286	0.0209995	0.888695	0.93755
Cacybp	-0.0332232	0.0798348	-0.113058	0.441789	0.613621
Gas5	-0.127404	0.30615	-0.433554	0.0108975	0.0456238
Prdx6	-0.0162339	0.0390099	-0.0552438	0.703344	0.816941
Myoc	-0.186361	0.447823	-0.634184	0.00015427	0.00146556
Prrx1	-0.0644691	0.154918	-0.219387	0.177363	0.340881
Mettl11b	-0.0993269	0.238681	-0.338008	0.0298827	0.0965315
Kifap3	-0.0557956	0.134076	-0.189872	0.229359	0.401691
Nme7	0.192416	-0.462373	0.654789	1.5547e-06	2.54908e-05
Atp1b1	0.359595	-0.864102	1.2237	6.5273e-18	6.02377e-16
Dpt	0.0511225	-0.122847	0.173969	0.248706	0.421977
Tiprl	-0.0796855	0.191483	-0.271169	0.0908578	0.213123
Dcaf6	-0.0801877	0.19269	-0.272878	0.0695978	0.177288
Mpc2	-0.0689011	0.165568	-0.234469	0.144252	0.294335
Rcsd1	-0.138472	0.332747	-0.471219	0.000637162	0.00483106
Dusp27	-0.0864091	0.20764	-0.294049	0.0552504	0.15098
Mgst3	0.0588145	-0.14133	0.200145	0.185208	0.348817
Rxrg	-0.125957	0.302673	-0.42863	0.00666644	0.0316191
Pbx1	0.0217532	-0.0522727	0.0740259	0.638591	0.771949
Rgs5	-0.0988794	0.237606	-0.336485	0.0181177	0.0670029
Uap1	-0.112475	0.270276	-0.382751	0.0162281	0.0618123
Sdhc	0.059156	-0.142151	0.201307	0.198593	0.364397
Mpz	0.292045	-0.701781	0.993826	8.04203e-22	9.62065e-20
Ndufs2	0.0229672	-0.0551899	0.0781572	0.599587	0.742302
Pfdn2	-0.0716762	0.172237	-0.243913	0.103328	0.234211
Ncstn	-0.00797232	0.0191574	-0.0271297	0.866701	0.924825
Copa	-0.134465	0.323118	-0.457584	0.00439245	0.0234548
Pex19	0.0185926	-0.0446777	0.0632703	0.70144	0.815276
Dcaf8	-0.0782433	0.188017	-0.266261	0.0797937	0.195624
Pea15a	0.0123086	-0.0295774	0.041886	0.786028	0.874624
Casq1	-0.474831	1.14101	-1.61584	4.61674e-30	2.1303e-27
Igsf8	0.0683291	-0.164194	0.232523	0.10379	0.235093
Atp1a2	-0.0667518	0.160404	-0.227155	0.126979	0.268243
Dusp23	0.0314927	-0.0756766	0.107169	0.478149	0.648371
Fh1	0.0339257	-0.0815229	0.115449	0.469323	0.640707
Zbtb18	0.0673013	-0.161724	0.229025	0.134209	0.279314
Desi2	0.0451819	-0.108571	0.153753	0.297634	0.474921
Cox20	0.0151353	-0.0363699	0.0515052	0.715632	0.825812
Hnrnpu	0.0125328	-0.0301162	0.042649	0.782791	0.87277
Cnst	-0.080318	0.193003	-0.273321	0.0745331	0.186832
Sccpdh	-0.0457084	0.109837	-0.155545	0.291379	0.469637
Coq8a	0.0630238	-0.151445	0.214469	0.16989	0.330968
Itpkb	0.0594381	-0.142829	0.202267	0.177855	0.341193
Cnih4	-0.0235011	0.0564728	-0.0799738	0.581941	0.731388
Wdr26	-0.0816929	0.196307	-0.278	0.0688258	0.175876
Lbr	-0.0489192	0.117552	-0.166471	0.285188	0.463688
Enah	0.133071	-0.319768	0.45284	0.00163757	0.0106212
Srp9	-0.174661	0.419708	-0.594369	0.00017897	0.00166113
Mia3	-0.137716	0.330929	-0.468645	0.00318876	0.0184582
Dusp10	-0.0167055	0.0401431	-0.0568486	0.699984	0.814735
Mtarc2	-0.167874	0.403398	-0.571272	0.00031345	0.00266433
Eprs	-0.0800495	0.192358	-0.272407	0.0996866	0.228685
Tgfb2	-0.201152	0.483365	-0.684517	2.34915e-05	0.000288939
Pdcd5-ps	-0.0309889	0.0744658	-0.105455	0.510905	0.675491
Smyd2	-0.363585	0.87369	-1.23728	1.11661e-14	7.07188e-13
Nenf	-0.0863329	0.207457	-0.29379	0.0516407	0.144165
Ppp2r5a	0.041211	-0.0990295	0.140241	0.367262	0.543407
Lpgat1	0.0561215	-0.134859	0.19098	0.206882	0.373491
Gstp-ps	-0.186226	0.447498	-0.633723	3.04808e-05	0.000359317
Prpf18	-0.0632301	0.151941	-0.215171	0.158417	0.314929
Phyh	0.105135	-0.252639	0.357774	0.00992745	0.0427542
Optn	-0.181964	0.437258	-0.619222	0.000176393	0.00164668
Cdc123	-0.10906	0.262069	-0.371129	0.0282932	0.0932522
Upf2	0.014013	-0.033673	0.0476859	0.747659	0.850331
Celf2	-0.0810859	0.194848	-0.275934	0.0859843	0.205573
Atp5c1	0.0888483	-0.213501	0.302349	0.0366233	0.112446
Prkcq	0.021559	-0.051806	0.073365	0.623539	0.760585
Pfkfb3	-0.122664	0.294759	-0.417422	0.00360428	0.0201068
Rbm17	-0.0962016	0.231171	-0.327372	0.0442194	0.127868
Pter	-0.0197158	0.0473769	-0.0670927	0.666714	0.792305
Rsu1	-0.0428585	0.102988	-0.145847	0.357666	0.535587
Vim	-0.0377046	0.0906035	-0.128308	0.421253	0.594948
Hacd1	-0.0944218	0.226894	-0.321316	0.0409684	0.121402
Commd3	-0.00138034	0.00331693	-0.00469727	0.974315	0.985845
Bmi1	0.0453616	-0.109003	0.154365	0.3305	0.50931
Etl4	-0.0230372	0.0553579	-0.0783951	0.599753	0.742302
Yme1l1	-0.0372112	0.089418	-0.126629	0.380168	0.557143
Tubb4b	-0.143349	0.344465	-0.487814	0.00331384	0.0190457
Anapc2	0.0226022	-0.0543128	0.076915	0.626272	0.763054
Entpd2	-0.0564139	0.135562	-0.191976	0.204162	0.37089
Fbxw5	-0.0844965	0.203044	-0.28754	0.0750166	0.187687
Edf1	-0.0987292	0.237245	-0.335974	0.0285617	0.0938287
Phpt1	-0.100532	0.241577	-0.34211	0.0359621	0.111049
Camsap1	-0.115769	0.278192	-0.393961	0.0109935	0.0458774
Ubac1	-0.0979955	0.235482	-0.333477	0.0343934	0.10723
Nacc2	-0.00300106	0.0072115	-0.0102126	0.945957	0.970005
Dnlz	0.0107611	-0.0258588	0.0366199	0.788794	0.875835
Pmpca	-0.113543	0.272843	-0.386386	0.0254197	0.0862206
Surf4	-0.111059	0.266874	-0.377934	0.0120603	0.0493722
Rxra	-0.0970095	0.233112	-0.330122	0.0450626	0.129841
Rapgef1	-0.0926363	0.222604	-0.31524	0.0598116	0.159794
Set	-0.040759	0.0979432	-0.138702	0.3754	0.551908
Endog	0.0439512	-0.105614	0.149565	0.295951	0.473462
Lrrc8a	0.0202701	-0.0487087	0.0689788	0.647125	0.777031
Crat	0.004787	-0.0115031	0.0162901	0.912784	0.952907
Ptpa	0.111932	-0.268971	0.380903	0.00726968	0.0334488
BC005624	-0.0239133	0.0574633	-0.0813766	0.588372	0.734976
Prrc2b	-0.0783004	0.188155	-0.266455	0.10303	0.234027
Swi5	-0.000719682	0.00172938	-0.00244907	0.987382	0.992235
1110008P14Rik	-0.109692	0.263588	-0.373279	0.0104917	0.0444145
Ptges2	-0.0675491	0.16232	-0.229869	0.165437	0.324765
Ak1	-0.13876	0.333438	-0.472197	0.00124221	0.00855511
Mapkap1	0.001556	-0.00373904	0.00529504	0.974149	0.985845
Gapvd1	-0.0420585	0.101066	-0.143124	0.377401	0.554093
Hspa5	-0.059523	0.143033	-0.202556	0.192974	0.356991
Rab14	-0.0594321	0.142814	-0.202247	0.183961	0.347323
Gsn	-0.2503	0.601468	-0.851769	1.27139e-08	3.06461e-07
Stom	0.00466004	-0.011198	0.0158581	0.91816	0.955034
Ndufa8	0.125427	-0.301399	0.426826	0.00432333	0.0231966
Mrrf	0.0320863	-0.0771029	0.109189	0.486953	0.656726
Rabgap1	-0.0170201	0.0408989	-0.057919	0.705549	0.818284
Psmb7	-0.194222	0.466713	-0.660935	7.31947e-05	0.000775031
Arpc5l	-0.12806	0.307726	-0.435786	0.00348853	0.0196457
Ppp6c	-0.031973	0.0768306	-0.108804	0.521052	0.682806
Gtdc1	-0.0429358	0.103174	-0.14611	0.395123	0.571745
Acvr2a	-0.155136	0.37279	-0.527927	0.000813604	0.00593913
Mmadhc	-0.0743717	0.178714	-0.253086	0.0908087	0.213123
Neb	-0.317235	0.762311	-1.07955	5.8739e-13	2.91887e-11
Prpf40a	-0.0891331	0.214186	-0.303319	0.0671965	0.172944
Gpd2	-0.174633	0.419642	-0.594275	7.82373e-05	0.00081782
Rbms1	-0.0472665	0.113581	-0.160847	0.320767	0.497542
Psmd14	-0.205488	0.493785	-0.699274	7.36282e-06	0.000105697
Xirp2	-0.0995019	0.239102	-0.338604	0.0245231	0.0839996
Klhl41	-0.234679	0.563931	-0.798611	1.30688e-07	2.55832e-06
Ppig	-0.071094	0.170838	-0.241932	0.118024	0.255244
Ssb	-0.10134	0.24352	-0.34486	0.0198534	0.0716496
Ubr3	-0.152415	0.366252	-0.518667	0.000432645	0.00346112
Gorasp2	-0.0587516	0.141179	-0.199931	0.177406	0.340881
Tlk1	-0.0198483	0.0476951	-0.0675434	0.691065	0.808746
Dync1i2	-0.121957	0.29306	-0.415017	0.0116608	0.0482258
Slc25a12	-0.0335386	0.0805928	-0.114131	0.421003	0.594948
Pdk1	-0.0373962	0.0898626	-0.127259	0.431116	0.603861
Map3k20	-0.171256	0.411525	-0.582781	0.000220712	0.00197479
Ola1	-0.031187	0.0749419	-0.106129	0.505188	0.670876
Atp5g3	0.251037	-0.603238	0.854275	2.6474e-10	8.22222e-09
Mrpl23-ps1	0.0216574	-0.0520425	0.0736999	0.620364	0.759006
Hnrnpa3	-0.0455479	0.109451	-0.154999	0.337361	0.51619
Plekha3	-0.050072	0.120322	-0.170394	0.27481	0.451479
Ttn	-0.113581	0.272932	-0.386513	0.00857181	0.0385076
Ube2e3	0.0267928	-0.0643827	0.0911755	0.524608	0.686026
Dnajc10	-0.0891357	0.214192	-0.303328	0.0533944	0.147648
Nckap1	-0.0108572	0.0260897	-0.0369468	0.802778	0.884672
Zc3h15	-0.0798018	0.191763	-0.271564	0.087882	0.208789
Ctnnd1	0.0631533	-0.151756	0.21491	0.154769	0.309537
Tmx2	-0.030114	0.0723636	-0.102478	0.515252	0.678737
Zdhhc5	-0.0279973	0.067277	-0.0952742	0.557027	0.712984
Serping1	-0.0430678	0.103491	-0.146559	0.330037	0.509086
Mtch2	-0.0466787	0.112168	-0.158847	0.290214	0.468228
Ndufs3	-0.00592621	0.0142406	-0.0201668	0.890879	0.938226
Ptpmt1	-0.0146872	0.0352932	-0.0499804	0.738736	0.843449
Celf1	-0.00349806	0.00840579	-0.0119038	0.937124	0.965189
Rapsn	0.0693655	-0.166684	0.23605	0.112736	0.247713
Psmc3	-0.144282	0.346708	-0.49099	0.00097342	0.00694072
Pacsin3	-0.112497	0.270329	-0.382826	0.00893914	0.0396846
Arfgap2	-0.0942086	0.226382	-0.32059	0.051289	0.143432
Pex16	-0.0220634	0.0530181	-0.0750816	0.624237	0.760862
Ext2	0.00793909	-0.0190775	0.0270166	0.857063	0.918778
Alkbh3	-0.0451388	0.108468	-0.153606	0.319638	0.496599
Api5	-0.0292544	0.070298	-0.0995524	0.494367	0.662647
B230118H07Rik	-0.0245042	0.0588831	-0.0833873	0.572146	0.724435
Pdhx	-0.0194544	0.0467486	-0.0662029	0.685002	0.804515
Apip	-0.0690197	0.165853	-0.234873	0.108177	0.24114
Cat	0.133632	-0.321115	0.454746	0.00287143	0.0168325
Caprin1	-0.0609598	0.146485	-0.207445	0.143183	0.29308
Fbxo3	-0.0547379	0.131534	-0.186272	0.240681	0.414217
Cd59a	-0.00221351	0.00531904	-0.00753255	0.963277	0.981819
Hipk3	-0.239967	0.576636	-0.816603	6.33724e-08	1.33786e-06
Qser1	-0.127332	0.305976	-0.433307	0.00479132	0.024881
Eif3m	-0.0180344	0.0433365	-0.061371	0.680617	0.800871
Immp1l	-0.0605783	0.145569	-0.206147	0.212261	0.380257
Nop10	0.0182549	-0.0438663	0.0621213	0.685533	0.804556
Slc12a6	-0.00735557	0.0176753	-0.0250309	0.870215	0.925822
Emc4	-0.141804	0.340752	-0.482556	0.00215413	0.0134062
Emc7	-0.0753362	0.181032	-0.256368	0.0998497	0.228734
Actc1	0.399635	-0.960316	1.35995	1.55863e-39	5.03438e-36
Fam98b	-0.121572	0.292136	-0.413707	0.00273907	0.0163232
Srp14	-0.128793	0.309489	-0.438282	0.0043973	0.0234548
Ivd	0.00255205	-0.00613254	0.00868459	0.953082	0.97543
Chac1	-0.119347	0.286789	-0.406137	0.00854048	0.0384203
Chp1	0.0110134	-0.026465	0.0374784	0.796748	0.882045
Oip5os1	0.00278746	-0.00669822	0.00948567	0.948927	0.972163
Ndufaf1	0.0832552	-0.200061	0.283316	0.0578252	0.156167
Ehd4	-0.0216902	0.0521211	-0.0738113	0.636719	0.771125
Capn3	-0.104259	0.250533	-0.354792	0.0228153	0.0796598
Zfp106	-0.152484	0.366416	-0.5189	0.000608887	0.00468263
Lrrc57	-0.0490197	0.117794	-0.166813	0.28982	0.468208
Ccndbp1	-0.0421664	0.101325	-0.143492	0.347324	0.525953
Ppip5k1	0.0892912	-0.214565	0.303857	0.0389079	0.11742
Serf2	-0.0528749	0.127058	-0.179933	0.274941	0.451479
Hypk	-0.029363	0.0705588	-0.0999217	0.491294	0.66065
Eif3j1	-0.0461765	0.110962	-0.157138	0.320861	0.497542
B2m	-0.0657775	0.158062	-0.22384	0.163474	0.321965
Sord	0.00870407	-0.0209158	0.0296198	0.850179	0.91396
Eid1	0.0872259	-0.209603	0.296829	0.0294854	0.0957163
Secisbp2l	0.0236182	-0.0567543	0.0803725	0.597792	0.741632
Cops2	-0.0631835	0.151829	-0.215013	0.162074	0.320183
Usp50	-0.15399	0.370036	-0.524027	0.000391993	0.00323334
Sppl2a	-0.135552	0.325729	-0.461281	0.00249364	0.0151399
Snrnp200	-0.0467755	0.112401	-0.159176	0.315698	0.493126
Stard7	0.0670981	-0.161236	0.228334	0.121137	0.259358
Mrps5	-0.0435601	0.104674	-0.148235	0.358844	0.536659
Mtln	-0.0757268	0.18197	-0.257697	0.101857	0.231852
Snrpb	-0.0730712	0.175589	-0.24866	0.0882768	0.209016
Idh3b	0.0686172	-0.164886	0.233503	0.143654	0.293673
Ddrgk1	0.0444345	-0.106775	0.15121	0.335171	0.5143
Cenpb	0.00612963	-0.0147294	0.0208591	0.89271	0.939542
Mavs	-0.0581294	0.139684	-0.197813	0.239063	0.412485
Smox	-0.34806	0.836383	-1.18444	2.9854e-17	2.60618e-15
Prnp	-0.220935	0.530904	-0.75184	1.56772e-06	2.55744e-05
Gpcpd1	-0.180042	0.432638	-0.612679	1.24554e-05	0.000167236
Mkks	-0.00873885	0.0209993	-0.0297382	0.850294	0.91396
Ndufaf5	-0.0494346	0.118791	-0.168225	0.274256	0.451424
Snrpb2	0.0550374	-0.132254	0.187291	0.197618	0.3635
Rrbp1	0.00143083	-0.00343825	0.00486908	0.971934	0.98527
Snx5	-0.148287	0.356333	-0.50462	0.0028918	0.0168906
Naa20	-0.0427743	0.102786	-0.14556	0.360058	0.537674
Kiz	0.0552684	-0.132809	0.188078	0.18349	0.346795
Cd93	-0.0480038	0.115352	-0.163356	0.268978	0.445767
Cst3	-0.289222	0.694996	-0.984218	4.40706e-12	1.94997e-10
Acss1	0.0321605	-0.0772813	0.109442	0.434088	0.606708
Abhd12	-0.0163802	0.0393614	-0.0557416	0.731049	0.83615
Nsfl1c	-0.0639572	0.153688	-0.217646	0.162611	0.320726
Fkbp1a	-0.188417	0.452762	-0.641179	2.35266e-05	0.000288939
Csnk2a1	-0.0883071	0.212201	-0.300508	0.0365477	0.112349
Id1	0.0848143	-0.203807	0.288622	0.0683584	0.174959
Mylk2	-0.238285	0.572596	-0.810881	7.76497e-07	1.36309e-05
Pdrg1	-0.101794	0.244609	-0.346403	0.0352305	0.109418
Mapre1	-0.0449926	0.108116	-0.153109	0.326125	0.504252
Snta1	-0.130092	0.31261	-0.442702	0.00252657	0.0153111
Pxmp4	0.0679357	-0.163249	0.231184	0.117075	0.253793
Chmp4b	-0.141454	0.339912	-0.481366	0.00212501	0.0132505
Eif2s2	-0.0895963	0.215299	-0.304895	0.0375609	0.114671
Dynlrb1	-0.0756736	0.181843	-0.257516	0.0826508	0.200121
Map1lc3a	-0.124508	0.299191	-0.423699	0.00685647	0.0321428
Trp53inp2	0.0550287	-0.132233	0.187262	0.195436	0.360307
Trpc4ap	-0.0591836	0.142217	-0.201401	0.180699	0.343732
Eif6	-0.115574	0.277722	-0.393296	0.0120549	0.0493722
Uqcc1	0.0183956	-0.0442042	0.0625998	0.674784	0.796911
Ergic3	-0.0906627	0.217861	-0.308524	0.0758736	0.189099
Nfs1	-0.0210223	0.0505163	-0.0715386	0.638331	0.771924
Romo1	-0.0375758	0.0902941	-0.12787	0.390214	0.566978
Rbm39	-0.0752353	0.180789	-0.256024	0.106563	0.239192
Scand1	0.0281126	-0.0675541	0.0956667	0.545444	0.704714
2900097C17Rik	-0.108196	0.259993	-0.368189	0.0148401	0.0577513
Myl9	0.0661616	-0.158985	0.225147	0.110456	0.245089
Rab5if	-0.039355	0.0945694	-0.133924	0.393236	0.570342
Tti1	-0.0433482	0.104165	-0.147513	0.346986	0.5259
Tgm2	-0.0507712	0.122002	-0.172774	0.269728	0.446588
Ralgapb	-0.00700248	0.0168269	-0.0238293	0.87279	0.927339
Top1	0.011863	-0.0285066	0.0403696	0.784475	0.873621
Srsf6	-0.0098372	0.0236386	-0.0334758	0.831403	0.904185
Jph2	-0.0554057	0.133139	-0.188545	0.183984	0.347323
Fitm2	-0.0132805	0.0319129	-0.0451934	0.763899	0.860129
Serinc3	-0.204545	0.491519	-0.696065	7.45205e-06	0.000106505
Pkig	0.000111687	-0.000268382	0.000380069	0.998155	0.998582
Ywhab	-0.135521	0.325656	-0.461177	0.00353179	0.019805
Dbndd2	-0.00890452	0.0213974	-0.0303019	0.835335	0.904679
Ube2c	-0.0193891	0.0465918	-0.065981	0.663727	0.789627
Tnnc2	-0.303814	0.730059	-1.03387	1.41257e-13	7.73321e-12
Ctsa	-0.0328577	0.0789565	-0.111814	0.462565	0.634971
Pcif1	-0.101578	0.24409	-0.345667	0.0389111	0.11742
Slc35c2	-0.0230497	0.0553881	-0.0784379	0.628817	0.764713
Zmynd8	0.0520697	-0.125123	0.177192	0.270911	0.447821
Kcnb1	-0.0142992	0.0343608	-0.04866	0.751881	0.853176
Rnf114	0.0997679	-0.239741	0.339509	0.012846	0.0516078
Ube2v1	-0.0205565	0.049397	-0.0699536	0.647599	0.777312
Dpm1	-0.160239	0.385053	-0.545292	0.00054573	0.00423728
Rbm38	0.0284996	-0.0684841	0.0969836	0.554597	0.711306
Pmepa1	-0.121879	0.292872	-0.414751	0.0100165	0.0430802
Rab22a	0.00175065	-0.00420679	0.00595744	0.969038	0.983
Vapb	0.0482528	-0.115951	0.164203	0.251002	0.424692
Npepl1	-0.0495388	0.119041	-0.16858	0.274377	0.451424
Gnas	-0.16683	0.40089	-0.56772	0.000634412	0.00482153
Atp5e	0.114637	-0.275472	0.390109	0.00502398	0.0256872
Prelid3b	-0.0429592	0.10323	-0.146189	0.312577	0.489871
Psma7	-0.129946	0.312258	-0.442204	0.00491273	0.0253484
Osbpl2	-0.00657538	0.0158005	-0.0223759	0.888196	0.93755
Adrm1	-0.0381445	0.0916607	-0.129805	0.378899	0.555787
Gid8	-0.0225787	0.0542563	-0.0768351	0.614043	0.755566
Ythdf1	-0.126278	0.303445	-0.429724	0.00540139	0.0270908
Eef1a2	0.0192529	-0.0462644	0.0655172	0.674402	0.796911
Ppdpf	-0.0817722	0.196497	-0.27827	0.0816903	0.198242
Dnajc5	-0.149305	0.358777	-0.508081	0.00103467	0.00732894
Samd10	-0.0264047	0.06345	-0.0898547	0.574044	0.725153
Pcmtd2	0.0135509	-0.0325627	0.0461137	0.763022	0.859931
Polr3k	-0.0876539	0.210631	-0.298285	0.082574	0.200086
Magix	0.0486233	-0.116841	0.165464	0.288742	0.467253
Gpkow	-0.139799	0.335935	-0.475734	0.00632933	0.030513
Pqbp1	-0.0258141	0.062031	-0.0878452	0.549041	0.707381
Timm17b	-0.0652359	0.156761	-0.221997	0.148725	0.301369
Rbm3	-0.143767	0.345471	-0.489238	0.00104344	0.00735875
Dynlt3	-0.0570744	0.137149	-0.194223	0.188075	0.351757
Tspan7	0.0228373	-0.0548776	0.0777149	0.613479	0.755158
Mid1ip1	0.0900989	-0.216506	0.306605	0.041847	0.12299
Atp6ap2	-0.0230675	0.0554309	-0.0784984	0.594135	0.738952
Med14	-0.0139829	0.0336006	-0.0475835	0.739307	0.843504
Usp9x	-0.166267	0.399537	-0.565804	0.000309736	0.00264668
Ddx3x	-0.0309185	0.0742967	-0.105215	0.52736	0.688509
Maoa	-0.00222096	0.00533693	-0.00755789	0.95946	0.979165
Maob	0.153109	-0.367919	0.521029	0.000113236	0.00112194
Ndufb11	0.0961125	-0.230957	0.327069	0.0271574	0.0901525
Uba1	-0.194892	0.468323	-0.663215	3.55767e-05	0.000411874
Cdk16	0.12002	-0.288407	0.408427	0.00629952	0.0304147
Slc25a5	0.0292831	-0.0703668	0.0996498	0.50623	0.671508
Ndufa1	0.132683	-0.318834	0.451517	0.00246035	0.0149942
Lamp2	0.0182581	-0.0438738	0.0621319	0.674579	0.796911
Stag2	-0.0956069	0.229742	-0.325349	0.0498312	0.140039
Rap2c	-0.0398437	0.0957439	-0.135588	0.395265	0.571745
Mospd1	-0.0471153	0.113217	-0.160333	0.274234	0.451424
Rtl8a	-0.142335	0.342028	-0.484363	0.0034094	0.0192931
Rtl8b	-0.0947526	0.227689	-0.322442	0.0303923	0.0976406
Slc9a6	-0.0503956	0.1211	-0.171495	0.256616	0.431929
Fhl1	0.263232	-0.632544	0.895776	2.75175e-11	1.11102e-09
Htatsf1	-0.00621518	0.014935	-0.0211502	0.894733	0.940446
Mtmr1	-0.11534	0.277161	-0.392502	0.0119311	0.0490296
Vma21	-0.173991	0.418097	-0.592087	0.000306317	0.00262441
Slc6a8	-0.0153217	0.0368178	-0.0521395	0.726358	0.832553
Bcap31	-0.0374808	0.0900658	-0.127547	0.366015	0.542418
Idh3g	-0.0269609	0.0647867	-0.0917476	0.550088	0.707877
Ssr4	-0.0986362	0.237021	-0.335657	0.0262708	0.0880236
Irak1	-0.0333048	0.080031	-0.113336	0.484219	0.65491
Flna	0.122184	-0.293605	0.415789	0.00461104	0.0242173
Emd	0.0463998	-0.111498	0.157898	0.246995	0.421402
Taz	-0.0422697	0.101573	-0.143843	0.359213	0.536659
Atp6ap1	-0.0610279	0.146649	-0.207677	0.196635	0.362105
Gdi1	-0.0419759	0.100868	-0.142843	0.356229	0.53393
Fam50a	-0.0672602	0.161625	-0.228885	0.114928	0.250993
Lage3	-0.106483	0.255878	-0.362361	0.0285843	0.0938287
Ubl4a	-0.0186096	0.0447185	-0.0633281	0.68052	0.800871
Fundc2	-0.0182516	0.0438584	-0.06211	0.67691	0.798255
Vbp1	-0.0569963	0.136961	-0.193957	0.176757	0.340188
Eif2s3x	-0.0737329	0.177179	-0.250912	0.0834599	0.201477
Apoo	-0.0802312	0.192794	-0.273026	0.0818335	0.19844
Asb12	-0.0706862	0.169858	-0.240544	0.0944591	0.219341
Las1l	0.000592823	-0.00142455	0.00201737	0.989495	0.993493
Msn	0.0284572	-0.0683823	0.0968395	0.550522	0.707877
Eda2r	-0.176237	0.423494	-0.59973	0.000267584	0.00234226
Igbp1	-0.120451	0.289441	-0.409892	0.0137155	0.0543571
Snx12	-0.0750324	0.180302	-0.255334	0.0957483	0.221697
Foxo4	-0.0376382	0.0904441	-0.128082	0.408736	0.58365
Itgb1bp2	0.00943282	-0.0226669	0.0320997	0.825393	0.89977
Ogt	-0.112355	0.269987	-0.382342	0.0398378	0.119255
Phka1	-0.395224	0.949717	-1.34494	2.14168e-21	2.47059e-19
Abcb7	-0.00610649	0.0146738	-0.0207803	0.889664	0.937864
Vcp-rs	-0.14478	0.347904	-0.492684	0.000413967	0.00337039
Atrx	0.0353005	-0.0848265	0.120127	0.427909	0.600672
Magt1	-0.0262251	0.0630184	-0.0892435	0.570066	0.723655
Cox7b	0.148042	-0.355744	0.503786	0.00031306	0.00266433
Pgk1	-0.224532	0.539547	-0.764078	1.26175e-07	2.50027e-06
Itm2a	-0.1043	0.250632	-0.354933	0.0242221	0.0833252
Gprasp1	-0.0798339	0.19184	-0.271673	0.0908407	0.213123
Tceal5	-0.0827968	0.198959	-0.281756	0.0718758	0.182085
Bex1	-0.0616843	0.148226	-0.209911	0.176295	0.339555
Tceal9	-0.040816	0.0980802	-0.138896	0.37143	0.54822
Morf4l2	-0.141652	0.340388	-0.482041	0.00239396	0.0146172
Prps1	0.00395631	-0.00950696	0.0134633	0.935469	0.964739
Tsc22d3	-0.216547	0.52036	-0.736907	8.51811e-06	0.000120146
Atg4a	-0.0423295	0.101717	-0.144047	0.351562	0.53038
Amot	-0.0694659	0.166925	-0.236391	0.12271	0.261446
Gnl3l	-0.119649	0.287514	-0.407163	0.0214673	0.0761135
Hsd17b10	-0.0558197	0.134134	-0.189954	0.229993	0.402208
Smc1a	-0.0196379	0.0471896	-0.0668274	0.674107	0.796911
Iqsec2	0.161927	-0.389107	0.551034	2.28022e-05	0.000283274
Sms	-0.150217	0.36097	-0.511188	0.00109287	0.0076241
Smpx	-0.109445	0.262996	-0.372441	0.0134038	0.0535064
Eif1ax	-0.0656853	0.157841	-0.223526	0.145541	0.296404
Sh3kbp1	0.149517	-0.359287	0.508804	0.000203861	0.00185485
Pdha1	0.020468	-0.0491843	0.0696523	0.649392	0.778244
Syap1	0.0108616	-0.0261004	0.036962	0.797082	0.882045
Ap1s2	-0.111203	0.267219	-0.378422	0.0125402	0.0508857
Asb11	-0.00651183	0.0156478	-0.0221597	0.887691	0.93755
Tmsb4x	0.0557187	-0.133891	0.18961	0.194148	0.358137
Pkia	-0.0019271	0.00463079	-0.00655789	0.965242	0.982396
Tpd52	-0.0584424	0.140436	-0.198878	0.213048	0.381302
Fabp4	0.0878853	-0.211187	0.299072	0.0495841	0.139753
Car3	-0.539304	1.29594	-1.83524	3.93304e-38	6.35186e-35
Ythdf3	0.019392	-0.0465986	0.0659906	0.636172	0.770756
Armc1	0.00936699	-0.0225087	0.0318757	0.83798	0.905848
Pde7a	-0.0128048	0.0307698	-0.0435746	0.768668	0.862866
Gyg	-0.153651	0.369221	-0.522872	0.00132525	0.00893644
Tbl1xr1	-0.10775	0.258921	-0.36667	0.0145722	0.0570523
Tnik	0.028714	-0.0689992	0.0977132	0.524182	0.686026
Sec62	-0.0829011	0.19921	-0.282111	0.0532437	0.147493
Skil	-0.084036	0.201937	-0.285973	0.0416442	0.122729
Pik3ca	-0.085473	0.20539	-0.290863	0.0609876	0.161998
Zfp639	-0.0291842	0.0701293	-0.0993135	0.520393	0.682448
Mfn1	0.128991	-0.309964	0.438955	0.00512279	0.0259758
Mrpl47	0.0236506	-0.056832	0.0804826	0.588712	0.734976
Ndufb5	0.0618584	-0.148645	0.210503	0.133385	0.278136
Usp13	-0.0951087	0.228545	-0.323654	0.0154877	0.0597674
Fxr1	-0.0366601	0.0880937	-0.124754	0.420726	0.594948
Dnajc19	-0.0880113	0.21149	-0.299501	0.0565826	0.153581
Dcun1d1	-0.0379441	0.091179	-0.129123	0.413653	0.587554
Mccc1	-0.0660825	0.158795	-0.224878	0.179962	0.342936
Acad9	-0.0391515	0.0940804	-0.133232	0.397079	0.572862
Anxa5	-0.0559627	0.134477	-0.19044	0.254733	0.429205
Exosc9	-0.012532	0.0301142	-0.0426462	0.780984	0.871658
4932438A13Rik	-0.0742149	0.178337	-0.252552	0.111306	0.246131
Spry1	0.0426973	-0.102601	0.145298	0.351314	0.53038
Larp1b	-0.0968838	0.23281	-0.329694	0.0324937	0.102998
Jade1	0.0066272	-0.0159251	0.0225523	0.893237	0.939732
Ndufc1	0.0552231	-0.1327	0.187923	0.199593	0.365468
Naa15	0.0136613	-0.0328278	0.0464891	0.758917	0.856799
Setd7	-0.15752	0.378518	-0.536038	0.000412854	0.00337039
Foxo1	-0.0948888	0.228016	-0.322905	0.0470135	0.134265
Cog6	-0.0670271	0.161065	-0.228092	0.11511	0.25122
Wwtr1	0.00521145	-0.012523	0.0177345	0.903536	0.947539
Pfn2	-0.162909	0.391469	-0.554379	0.000432907	0.00346112
Selenot	-0.0413216	0.0992953	-0.140617	0.357856	0.535624
Mbnl1	-0.126204	0.303266	-0.429469	0.00511478	0.0259758
P2ry1	0.143458	-0.344728	0.488187	0.000618184	0.00472919
Dhx36	-0.0451788	0.108564	-0.153743	0.340344	0.518708
Ssr3	-0.138616	0.333093	-0.47171	0.00431476	0.0231891
Mlf1	-0.0804554	0.193333	-0.273789	0.0557233	0.151888
Iqschfp	-0.102938	0.247358	-0.350296	0.0176006	0.0657225
Schip1	-0.110422	0.265343	-0.375765	0.00972762	0.0421183
Kpna4	-0.110874	0.266428	-0.377302	0.0322117	0.102606
Ppm1l	-0.0935497	0.224799	-0.318348	0.0368448	0.113019
Nmd3	-0.0243213	0.0584438	-0.0827652	0.584798	0.733268
Ppid	-0.00993445	0.0238723	-0.0338068	0.826926	0.901137
Etfdh	0.0700995	-0.168448	0.238548	0.106056	0.238551
Plrg1	-0.0753488	0.181062	-0.256411	0.127796	0.269264
Arfip1	-0.0493385	0.11856	-0.167898	0.249891	0.423034
Fam160a1	-0.0765807	0.184022	-0.260603	0.100161	0.229284
Hdgf	-0.167933	0.403541	-0.571474	0.000190516	0.00174241
Mrpl24	-0.0143568	0.0344991	-0.0488559	0.753812	0.853422
Naxe	-0.0447053	0.107426	-0.152132	0.339071	0.517512
Mef2d	-0.0569987	0.136967	-0.193966	0.198285	0.364106
Cct3	-0.0370806	0.0891042	-0.126185	0.448226	0.62003
Pmf1	-0.025755	0.061889	-0.087644	0.548902	0.707381
Lmna	-0.0935117	0.224707	-0.318219	0.0561768	0.152722
Lamtor2	-0.0127647	0.0306735	-0.0434382	0.77521	0.867011
Ubqln4	-0.0641481	0.154147	-0.218295	0.168879	0.329885
Rtraf-ps	-0.111801	0.268656	-0.380457	0.0164927	0.0624517
Rit1	-0.0781425	0.187775	-0.265918	0.100482	0.229857
Dap3	-0.0172376	0.0414218	-0.0586594	0.716794	0.825842
Scamp3	-0.123478	0.296716	-0.420195	0.0118319	0.0487461
Krtcap2	-0.151535	0.364137	-0.515672	0.00078423	0.00579648
Pbxip1	-0.0935116	0.224707	-0.318218	0.0377539	0.115043
Ube2q1	-0.0475656	0.114299	-0.161865	0.336817	0.515601
Hax1	-0.0392223	0.0942506	-0.133473	0.362697	0.539601
Ubap2l	-0.00818312	0.0196639	-0.027847	0.860614	0.920671
4933434E20Rik	-0.0505464	0.121462	-0.172009	0.288088	0.467131
Tpm3	0.129041	-0.310084	0.439125	0.00228606	0.0141185
Jtb	-0.041126	0.0988251	-0.139951	0.373713	0.550179
Dennd4b	0.0896061	-0.215322	0.304928	0.0455575	0.131034
Gatad2b	-0.116929	0.28098	-0.397909	0.00729092	0.0334988
Npr1	-0.000182994	0.000439731	-0.000622724	0.996703	0.997842
Snapin	-0.104556	0.251246	-0.355802	0.0315122	0.100677
Chtop	-0.0798687	0.191923	-0.271792	0.113952	0.249535
S100a1	0.0588559	-0.14143	0.200286	0.176835	0.340188
S100a16	-0.0344195	0.0827097	-0.117129	0.461363	0.633859
S100a6	-0.223169	0.536273	-0.759442	1.26076e-05	0.000167582
S100a11	-0.073026	0.175481	-0.248507	0.124034	0.263746
Rorc	-0.0896474	0.215421	-0.305069	0.0416021	0.122717
Snx27	-0.00356143	0.00855807	-0.0121195	0.942118	0.96758
Psmb4	-0.133954	0.32189	-0.455844	0.00661993	0.0315092
Psmd4	-0.199269	0.478839	-0.678108	9.31751e-07	1.60441e-05
Vps72	-0.0706119	0.169679	-0.240291	0.136311	0.28203
Tmod4	-0.215769	0.51849	-0.734259	9.36957e-07	1.60441e-05
Scnm1	-0.190707	0.458267	-0.648974	0.000136034	0.00131949
Mllt11	-0.337482	0.810964	-1.14845	2.67373e-12	1.21636e-10
Prune1	-0.0697246	0.167547	-0.237272	0.140654	0.288946
Mindy1	-0.112978	0.271484	-0.384462	0.0138007	0.0546278
Ensa	0.00401747	-0.00965391	0.0136714	0.923276	0.957054
Mcl1	-0.0533807	0.128273	-0.181654	0.27275	0.45017
Mrps21	-0.0799597	0.192142	-0.272102	0.0745594	0.186832
Car14	0.0126954	-0.0305069	0.0432023	0.772766	0.865476
Anp32e	-0.130446	0.313459	-0.443904	0.00399763	0.0218114
Otud7b	-0.0119061	0.0286102	-0.0405163	0.790505	0.877434
Sf3b4	0.0241493	-0.0580304	0.0821796	0.588437	0.734976
Hjv	-0.0366903	0.0881662	-0.124856	0.38887	0.565613
Txnip	-0.121847	0.292797	-0.414645	0.00629108	0.0304147
Rbm8a	0.00727114	-0.0174724	0.0247436	0.860814	0.920671
Pex11b	-0.0844457	0.202922	-0.287367	0.0676069	0.173862
Rnf115	-0.0803782	0.193148	-0.273526	0.0761922	0.189398
Prkab2	-0.176237	0.423496	-0.599733	9.78869e-05	0.00099426
Pde4dip	-0.30348	0.729258	-1.03274	1.25616e-10	4.27094e-09
Tbx15	-0.147195	0.353707	-0.500902	0.00103957	0.00734751
Atp1a1	-0.0848611	0.20392	-0.288781	0.0633788	0.166655
Casq2	0.151032	-0.362927	0.513959	0.00128907	0.00880272
Sike1	-0.117194	0.281615	-0.398809	0.0107075	0.0452093
Csde1	-0.160353	0.385326	-0.545679	0.000614273	0.00471283
Nras	-0.0761735	0.183044	-0.259217	0.086295	0.206163
Ampd1	-0.367018	0.881939	-1.24896	1.07141e-18	1.11634e-16
Bcas2	-0.0125074	0.0300551	-0.0425625	0.803531	0.885079
Rap1a	-0.0171387	0.041184	-0.0583227	0.704083	0.816941
Atp5pb	0.0896039	-0.215317	0.304921	0.0530686	0.147134
Dram2	0.00524004	-0.0125917	0.0178318	0.907236	0.949631
Rbm15	0.010771	-0.0258826	0.0366536	0.797487	0.882045
Kcnc4	-0.29911	0.718757	-1.01787	2.90571e-10	8.9385e-09
Strip1	0.0658293	-0.158187	0.224016	0.107833	0.240872
Gstm5	-0.0915966	0.220105	-0.311702	0.034901	0.108708
Gstm2	-0.1799	0.432298	-0.612199	5.31839e-05	0.000582319
Gstm1	-0.14514	0.348769	-0.493909	0.00121762	0.00843971
Amigo1	0.0282062	-0.067779	0.0959852	0.531585	0.69306
Sypl2	-0.108134	0.259846	-0.36798	0.0197354	0.0713035
Psma5	-0.0851748	0.204674	-0.289849	0.0645633	0.169132
Sort1	0.0135298	-0.032512	0.0460418	0.757576	0.856417
Sars	-0.0114212	0.027445	-0.0388663	0.798238	0.882076
Rtca	-0.0654791	0.157345	-0.222824	0.140795	0.288946
Agl	-0.315328	0.757728	-1.07306	1.20163e-12	5.62502e-11
Tlcd4	-0.0818884	0.196777	-0.278665	0.0878019	0.208789
Abcd3	0.00205699	-0.00494292	0.00699992	0.964448	0.982396
1810037I17Rik	-0.00393403	0.00945342	-0.0133875	0.92875	0.959649
Myoz2	0.239243	-0.574898	0.814141	1.00382e-09	2.92102e-08
Synpo2	-0.0430871	0.103538	-0.146625	0.351134	0.53038
Snhg8	-0.0702306	0.168763	-0.238994	0.112148	0.247262
Camk2d	-0.0539348	0.129605	-0.183539	0.25272	0.426705
Ap1ar	0.000871649	-0.00209456	0.00296621	0.984408	0.990593
Pla2g12a	0.0378533	-0.0909609	0.128814	0.41127	0.586235
Ostc	-0.0570909	0.137189	-0.19428	0.192186	0.356421
Hadh	0.186222	-0.447488	0.633709	2.08431e-05	0.000262982
Aimp1	-0.0963485	0.231524	-0.327873	0.0378687	0.115284
Ppa2	-0.0168978	0.040605	-0.0575028	0.715874	0.825812
Ube2d3	-0.12377	0.297416	-0.421186	0.00658691	0.0314745
Nfkb1	0.00943159	-0.022664	0.0320956	0.824327	0.899503
Ppp3ca	-0.187458	0.450458	-0.637916	5.85072e-05	0.000636291
Emcn	0.0672828	-0.16168	0.228962	0.115471	0.251467
Ddit4l	-0.264934	0.636632	-0.901566	3.25607e-08	7.30355e-07
H2az1	-0.155671	0.374076	-0.529747	0.000795588	0.0058442
Lamtor3	-0.038865	0.0933919	-0.132257	0.352156	0.530533
1110002E22Rik	-0.0780656	0.18759	-0.265656	0.0632125	0.166403
Adh1	-0.0980086	0.235513	-0.333522	0.0290032	0.0945311
Adh5	-0.0621757	0.149407	-0.211583	0.173748	0.336253
Metap1	-0.161936	0.389131	-0.551067	0.000229412	0.00204133
Eif4e	-0.0765341	0.18391	-0.260444	0.107762	0.240872
Rap1gds1	-0.00467568	0.0112356	-0.0159113	0.922872	0.956943
Pdlim5	-0.144322	0.346803	-0.491125	0.000743751	0.00552257
Lmo4	0.0789136	-0.189628	0.268542	0.0842362	0.202896
Selenof	-0.158583	0.381072	-0.539654	0.000392406	0.00323334
Sh3glb1	0.0562484	-0.135164	0.191413	0.221045	0.390008
Ssx2ip	-0.0329221	0.0791112	-0.112033	0.441574	0.613621
Gng5	0.0178591	-0.0429151	0.0607742	0.651553	0.77945
Prkacb	-0.0326288	0.0784065	-0.111035	0.468794	0.640285
Ttll7	-0.390184	0.937607	-1.32779	1.90164e-15	1.42844e-13
Dnajb4	0.0868842	-0.208781	0.295666	0.035173	0.109418
Fubp1	-0.0232262	0.0558123	-0.0790385	0.64131	0.772634
Nexn	-0.138832	0.333612	-0.472444	0.00440775	0.0234548
Rabggtb	-0.101005	0.242713	-0.343717	0.0401408	0.11963
Acadm	0.123975	-0.297909	0.421884	0.00340083	0.0192931
Zranb2	-0.0455662	0.109495	-0.155061	0.300704	0.477989
Srsf11	-0.0561363	0.134895	-0.191031	0.244908	0.419237
Tgs1	0.02067	-0.0496697	0.0703398	0.629592	0.76508
Chchd7	0.00408259	-0.00981039	0.013893	0.929836	0.960463
Impad1	-0.0321172	0.0771772	-0.109294	0.49863	0.666353
Sdcbp	-0.0133782	0.0321475	-0.0455257	0.804915	0.885079
Rab2a	-0.24391	0.586112	-0.830022	2.81773e-07	5.29144e-06
Asph	-0.250992	0.603129	-0.85412	3.16079e-08	7.1394e-07
Pdp1	-0.0295205	0.0709374	-0.100458	0.494551	0.662647
Otud6b	-0.00912937	0.0219377	-0.0310671	0.84897	0.913449
Tmem64	-0.0996353	0.239422	-0.339057	0.0245497	0.0839996
Decr1	0.0668512	-0.160642	0.227494	0.125248	0.265628
Wwp1	-0.0634828	0.152548	-0.216031	0.147926	0.300315
Pnisr	-0.0324928	0.0780797	-0.110573	0.472695	0.64395
Coq3	-0.0198881	0.0477909	-0.0676791	0.67289	0.796882
Fbxl4	-0.107489	0.258294	-0.365782	0.0259403	0.0872784
Ndufaf4	-0.0231028	0.0555157	-0.0786185	0.616889	0.75634
Map3k7	0.00962523	-0.0231293	0.0327545	0.82825	0.901972
Rragd	-0.129137	0.310315	-0.439453	0.00376657	0.0206986
Ube2j1	-0.122412	0.294155	-0.416567	0.0085986	0.0385339
Pnrc1	-0.0727948	0.174925	-0.24772	0.115534	0.251467
Akirin2	-0.0499917	0.120129	-0.170121	0.253588	0.427723
Rars2	-0.085676	0.205878	-0.291554	0.0725437	0.18349
Smim27	-0.0797183	0.191562	-0.27128	0.06612	0.171265
Ndufb6	-0.0212076	0.0509615	-0.072169	0.637244	0.771125
Dnaja1	-0.036875	0.08861	-0.125485	0.431443	0.604058
Bag1	-0.000465708	0.00111909	-0.0015848	0.992442	0.995833
Chmp5	-0.0417055	0.100218	-0.141923	0.372056	0.54849
Ube2r2	0.0103155	-0.0247881	0.0351036	0.827618	0.901588
Ubap2	-0.149685	0.359691	-0.509376	0.00128007	0.00875982
Dcaf12	0.030756	-0.0739062	0.104662	0.50286	0.670342
Ubap1	-0.167724	0.403038	-0.570762	0.00046918	0.00372347
Cntfr	0.138887	-0.333744	0.472632	0.0003228	0.00272231
Il11ra1	-0.031141	0.0748313	-0.105972	0.493713	0.662647
Rpp25l	-0.110275	0.26499	-0.375265	0.0170002	0.063924
Dnajb5	0.0341791	-0.0821319	0.116311	0.441883	0.613621
Vcp	-0.25223	0.606104	-0.858334	2.62922e-08	6.09126e-07
Stoml2	0.0111623	-0.0268228	0.0379851	0.796895	0.882045
Tpm2	0.120523	-0.289614	0.410137	0.00297246	0.0172992
Tln1	0.0130745	-0.0314177	0.0444922	0.753019	0.853422
Npr2	0.0377637	-0.0907455	0.128509	0.406134	0.580962
Hint2	0.0700723	-0.168383	0.238455	0.0923554	0.215385
Clta	-0.0436603	0.104915	-0.148575	0.290205	0.468228
Slc25a51	-0.0233646	0.0561448	-0.0795094	0.599816	0.742302
Tmod1	-0.22857	0.549251	-0.777821	1.16734e-06	1.9635e-05
Anp32b	-0.0415302	0.0997964	-0.141327	0.397102	0.572862
Sec61b	-0.198567	0.477152	-0.675719	0.000119026	0.0011615
Erp44	-0.112674	0.270754	-0.383428	0.010265	0.0438571
Cavin4	-0.143161	0.344013	-0.487173	0.00168895	0.0108888
Mrpl50	-0.0167758	0.0403119	-0.0570877	0.708005	0.819955
Tmem246	-0.0891368	0.214194	-0.303331	0.0487702	0.137699
Rad23b	-0.0697487	0.167605	-0.237354	0.0899175	0.211711
Ptpn3	0.0167516	-0.0402538	0.0570054	0.696875	0.812602
Txn1	-0.0365578	0.087848	-0.124406	0.402966	0.577966
Ecpas	-0.0171944	0.0413179	-0.0585123	0.700907	0.814949
Hsdl2	0.0586669	-0.140976	0.199642	0.200981	0.367384
Atp6v1g1	-0.36339	0.873221	-1.23661	3.21294e-15	2.30618e-13
2310002L09Rik	0.00701636	-0.0168602	0.0238766	0.871384	0.92676
Nfib	-0.133072	0.319769	-0.452841	0.00237573	0.0145334
Rraga	-0.0805569	0.193577	-0.274134	0.0816323	0.198242
Haus6	-0.0303567	0.0729468	-0.103304	0.525254	0.686315
Mllt3	-0.0388966	0.0934679	-0.132365	0.401643	0.577232
Klhl9	-0.0405642	0.0974751	-0.138039	0.371139	0.548139
Mtap	-0.0272789	0.0655509	-0.0928298	0.533002	0.693896
Plaa	-0.0269845	0.0648432	-0.0918277	0.51192	0.675792
Alg6	0.00640321	-0.0153868	0.02179	0.892211	0.939322
Pgm1	-0.436285	1.04839	-1.48467	5.87962e-26	9.99535e-24
Jak1	-0.00427172	0.0102649	-0.0145366	0.928093	0.959649
Pde4b	-0.135876	0.326508	-0.462384	0.00273891	0.0163232
Mier1	0.0448021	-0.107659	0.152461	0.285153	0.463688
Prkaa2	-0.160004	0.384487	-0.544491	0.0004289	0.00345898
Plpp3	-0.0640288	0.15386	-0.217889	0.143398	0.293334
Usp24	-0.115422	0.277357	-0.392778	0.0104853	0.0444145
Ssbp3	0.0986265	-0.236998	0.335625	0.0152376	0.0590139
Mrpl37	0.0145767	-0.0350276	0.0496043	0.73203	0.836976
Tmem59	-0.0757495	0.182025	-0.257775	0.0978739	0.225648
Magoh	-0.0306357	0.0736171	-0.104253	0.50501	0.670876
Czib	-0.0526757	0.126579	-0.179255	0.242204	0.416127
Cpt2	0.101677	-0.244329	0.346006	0.0189072	0.0690839
Scp2	0.072327	-0.173801	0.246128	0.0579533	0.15634
Zyg11b	-0.101366	0.24358	-0.344946	0.0329865	0.103948
Zfyve9	-0.112965	0.271454	-0.384419	0.016539	0.0625539
Btf3l4	-0.0808571	0.194298	-0.275155	0.0849126	0.203778
Txndc12	-0.060214	0.144693	-0.204907	0.214788	0.382873
Nrd1	-0.0673364	0.161808	-0.229145	0.11818	0.255332
Osbpl9	0.00619763	-0.0148928	0.0210904	0.888364	0.93755
Eps15	-0.17427	0.418768	-0.593038	0.000321492	0.00271838
Rnf11	0.0241815	-0.0581077	0.0822892	0.594096	0.738952
Faf1	-0.0170221	0.0409039	-0.057926	0.704075	0.816941
Efcab14	-0.0393845	0.0946404	-0.134025	0.388694	0.565613
Atpaf1	0.0230867	-0.0554769	0.0785636	0.60944	0.751333
Mknk1	-0.0162562	0.0390635	-0.0553197	0.717434	0.825842
Uqcrh	0.0819732	-0.19698	0.278954	0.0546738	0.150167
Lrrc41	-0.0288399	0.0693018	-0.0981416	0.50709	0.672064
Mast2	0.0082974	-0.0199385	0.0282359	0.847654	0.912357
Akr1a1	-0.167409	0.402281	-0.56969	0.000285697	0.00248733
Prdx1	-0.0201342	0.0483823	-0.0685165	0.659983	0.786041
Urod	0.0346169	-0.0831839	0.117801	0.447772	0.619667
Rnf220	-0.0691389	0.16614	-0.235279	0.134932	0.280096
Eri3	-0.0849618	0.204162	-0.289124	0.0828652	0.20049
Atp6v0b	-0.0861922	0.207119	-0.293311	0.0647333	0.169302
Ipo13	-0.0337643	0.0811351	-0.114899	0.473383	0.644072
Tie1	0.0739533	-0.177709	0.251662	0.0617299	0.163299
Ebna1bp2	-0.135917	0.326605	-0.462522	0.00662376	0.0315092
AU022252	-0.050035	0.120233	-0.170268	0.292949	0.470965
Ybx1	0.0886832	-0.213104	0.301788	0.0333859	0.104797
Foxj3	-0.0705415	0.16951	-0.240052	0.078625	0.193862
Ctps	-0.0417079	0.100223	-0.141931	0.386983	0.564469
Nfyc	-0.123247	0.296161	-0.419408	0.0120921	0.0494399
Smap2	0.0690633	-0.165958	0.235021	0.100838	0.230508
Pabpc4	0.0148959	-0.0357947	0.0506907	0.734813	0.839742
Macf1	-0.0831249	0.199748	-0.282873	0.0967103	0.223604
Ndufs5	0.0201199	-0.0483477	0.0684676	0.642656	0.773678
Rragc	-0.024549	0.0589908	-0.0835398	0.597898	0.741632
Utp11	-0.0487146	0.117061	-0.165775	0.297865	0.474921
1110065P20Rik	-0.0410533	0.0986506	-0.139704	0.371786	0.548341
Mrps15	-0.022408	0.0538461	-0.0762541	0.623818	0.760639
Stk40	-0.0516229	0.124049	-0.175672	0.245901	0.420618
Thrap3	0.00147508	-0.0035446	0.00501968	0.974921	0.98591
Map7d1	-0.0223936	0.0538114	-0.076205	0.62305	0.760277
Psmb2	-0.134605	0.323454	-0.458059	0.00473018	0.024603
Sfpq	0.00103462	-0.00248618	0.00352081	0.981429	0.990057
Zfp362	0.00372983	-0.00896273	0.0126926	0.934685	0.964239
Rnf19b	0.0157239	-0.0377842	0.053508	0.719445	0.827055
Fndc5	0.278338	-0.668841	0.947179	2.22658e-13	1.17899e-11
Rbbp4	-0.0219974	0.0528594	-0.0748569	0.615818	0.75613
Eif3i	-0.117658	0.28273	-0.400388	0.010331	0.0440227
Tmem234	-0.110253	0.264936	-0.375188	0.0210613	0.0752522
Kpna6	-0.00817472	0.0196437	-0.0278184	0.853395	0.916683
Khdrbs1	0.0213866	-0.0513916	0.0727782	0.634647	0.769486
Ptp4a2	-0.173598	0.417153	-0.590751	0.000301433	0.00258944
Pef1	-0.123922	0.297783	-0.421706	0.0107921	0.0454477
Tinagl1	0.0982301	-0.236045	0.334275	0.0281367	0.092831
Serinc2	-0.195733	0.470343	-0.666076	1.46443e-05	0.000192148
Fabp3	0.401742	-0.965381	1.36712	1.3921e-28	4.99611e-26
Zcchc17	0.00617891	-0.0148478	0.0210267	0.884053	0.934785
Pum1	-0.0325604	0.0782422	-0.110803	0.473912	0.64452
Srsf4	0.00578619	-0.0139041	0.0196903	0.894198	0.940189
Epb41	0.017062	-0.0409996	0.0580616	0.719513	0.827055
Taf12	-0.0570753	0.137151	-0.194226	0.219631	0.388521
Dnajc8	-0.0327449	0.0786854	-0.11143	0.462804	0.635029
Rpa2	-0.0967005	0.23237	-0.32907	0.0389339	0.11742
Stx12	-0.0828997	0.199207	-0.282106	0.0636293	0.167092
Wdtc1	0.0263234	-0.0632548	0.0895783	0.584469	0.73314
Zdhhc18	-0.120586	0.289767	-0.410354	0.0107395	0.0452854
Arid1a	-0.0561622	0.134957	-0.191119	0.236335	0.409748
Cep85	0.0165721	-0.0398225	0.0563945	0.700471	0.814735
Cnksr1	-0.157974	0.379608	-0.537582	0.00031753	0.00269192
Trim63	-0.163509	0.392909	-0.556418	0.000334245	0.00281149
Mtfr1l	-0.0286711	0.0688962	-0.0975673	0.49705	0.664792
Maco1	-0.103619	0.248995	-0.352614	0.0149537	0.0581233
Tmem50a	-0.0728333	0.175017	-0.247851	0.0919205	0.214836
Rsrp1	0.0459665	-0.110457	0.156423	0.247551	0.421402
Syf2	-0.0720803	0.173208	-0.245288	0.119936	0.257888
Pnrc2	0.00303991	-0.00730487	0.0103448	0.94598	0.970005
Hmgcl	0.0922449	-0.221663	0.313908	0.0213438	0.0757586
Lypla2	-0.0468864	0.112667	-0.159554	0.242843	0.417003
Eloa	-0.085029	0.204323	-0.289352	0.0355284	0.109937
Tcea3	0.0462517	-0.111142	0.157394	0.281926	0.460142
Zfp46	-0.0103982	0.0249867	-0.0353849	0.820878	0.897272
C1qb	-0.064338	0.154603	-0.218941	0.197865	0.363747
C1qc	-0.0755289	0.181495	-0.257024	0.11133	0.246131
Cdc42	-0.102633	0.246626	-0.34926	0.0330555	0.103962
Eif4g3	-0.00332864	0.00799868	-0.0113273	0.941496	0.967249
Hp1bp3	0.030034	-0.0721713	0.102205	0.504656	0.670798
Pink1	-0.0942375	0.226451	-0.320689	0.0431353	0.12529
Micos10	0.0276427	-0.0664249	0.0940676	0.54595	0.704803
Capzb	-0.194465	0.467297	-0.661763	7.20736e-06	0.000103928
Emc1	-0.0909576	0.21857	-0.309527	0.0659643	0.171139
Ubr4	-0.215706	0.518337	-0.734043	2.76729e-07	5.22711e-06
Aldh4a1	0.00260966	-0.00627097	0.00888063	0.957071	0.977161
Arhgef10l	-0.025595	0.0615044	-0.0870995	0.550507	0.707877
Padi2	0.0514782	-0.123701	0.17518	0.213811	0.381763
Sdhb	0.17357	-0.417085	0.590655	8.43017e-05	0.000869951
Fbxo42	-0.0886247	0.212964	-0.301589	0.0638328	0.167354
Hspb7	0.0797992	-0.191756	0.271555	0.0602517	0.160572
Ddi2	-0.174161	0.418505	-0.592666	0.000106839	0.00107171
Dhrs3	-0.0308094	0.0740346	-0.104844	0.512757	0.676555
Vps13d	-0.0265717	0.0638514	-0.090423	0.544897	0.704288
Mfn2	-0.0259919	0.0624582	-0.0884501	0.580585	0.731388
Mtor	-0.0408184	0.0980861	-0.138904	0.354603	0.533097
Tardbp	-0.148592	0.357065	-0.505657	0.0016715	0.0108089
Dffa	-0.0645984	0.155229	-0.219827	0.163337	0.321891
Kif1b	-0.0932088	0.223979	-0.317188	0.039782	0.119198
Ube4b	-0.0710115	0.170639	-0.241651	0.128059	0.269352
Ctnnbip1	-0.163234	0.39225	-0.555484	0.00105593	0.0074145
Tmem201	-0.0903878	0.217201	-0.307588	0.0389893	0.117477
Gpr157	-0.00823833	0.0197966	-0.0280349	0.855428	0.918256
Eno1	-0.225432	0.54171	-0.767143	7.09663e-07	1.25946e-05
Rere	0.0192877	-0.046348	0.0656357	0.676651	0.798255
Park7	-0.237221	0.570039	-0.807261	1.70808e-07	3.32355e-06
Camta1	-0.0131124	0.0315088	-0.0446212	0.762059	0.859212
Vamp3	-0.115323	0.277121	-0.392444	0.0163803	0.0622452
Thap3	-0.0487783	0.117213	-0.165992	0.281211	0.45944
Klhl21	-0.0413706	0.099413	-0.140784	0.35622	0.53393
A430005L14Rik	-0.0714113	0.1716	-0.243012	0.106691	0.239313
Tprgl	-0.029241	0.0702658	-0.0995068	0.507848	0.672549
Prxl2b	-0.101953	0.244991	-0.346944	0.0220242	0.0774927
Rer1	0.0305374	-0.073381	0.103918	0.488194	0.657677
Ski	0.00343144	-0.00824569	0.0116771	0.938947	0.965632
Tmem52	-0.0781427	0.187776	-0.265919	0.0797879	0.195624
Gnb1	-0.0555689	0.133531	-0.1891	0.210605	0.378221
Ssu72	-0.0928503	0.223118	-0.315968	0.0364104	0.112219
Mrpl20	-0.0498404	0.119766	-0.169606	0.270741	0.447769
Ccnl2	0.0154571	-0.0371433	0.0526004	0.722202	0.829262
Aurkaip1	-0.0396213	0.0952093	-0.134831	0.354777	0.533097
Ube2j2	0.0379155	-0.0911104	0.129026	0.40122	0.577
Sdf4	-0.083021	0.199498	-0.282519	0.0604696	0.160887
Perm1	-0.000989509	0.00237777	-0.00336728	0.983626	0.990371
Gatad1	-0.0579677	0.139295	-0.197263	0.22309	0.392474
Steap4	-0.000184057	0.000442287	-0.000626345	0.996689	0.997842
Sri	-0.0531831	0.127798	-0.180981	0.248756	0.421977
Abcb4	-0.0357592	0.0859289	-0.121688	0.421169	0.594948
Cacna2d1	-0.301379	0.72421	-1.02559	3.57729e-12	1.60481e-10
Sema3c	-0.0674955	0.162191	-0.229686	0.12446	0.264477
Cd36	0.281994	-0.677628	0.959623	1.5495e-11	6.58539e-10
Phtf2	-0.130489	0.313563	-0.444052	0.0051224	0.0259758
Tmem60	-0.11837	0.28444	-0.40281	0.00672346	0.0317497
Pmpcb	0.0365773	-0.0878948	0.124472	0.45214	0.624374
Psmc2	-0.266514	0.64043	-0.906944	1.15121e-08	2.7958e-07
Tomm7	-0.053321	0.12813	-0.181451	0.258765	0.434635
Fastk	0.0730109	-0.175444	0.248455	0.090699	0.213123
Agap3	-0.0988136	0.237448	-0.336261	0.0206316	0.0740445
Asb10	-0.130052	0.312512	-0.442564	0.00937607	0.0409408
Abcf2	-0.063366	0.152267	-0.215633	0.161419	0.319084
Smarcd3	-0.145084	0.348634	-0.493718	0.00336478	0.0192018
Rheb	-0.104995	0.252301	-0.357296	0.0152308	0.0590139
Kmt2c	-0.113883	0.27366	-0.387543	0.0126216	0.0510873
Ube3c	-0.0558435	0.134191	-0.190035	0.23076	0.403112
Dnajb6	-0.0757603	0.182051	-0.257811	0.0779432	0.192917
Hadha	0.0861733	-0.207073	0.293246	0.0407414	0.120951
Hadhb	0.190332	-0.457364	0.647696	1.07069e-05	0.000147791
Mapre3	-0.231431	0.556126	-0.787558	1.2991e-06	2.15185e-05
Ost4	-0.127992	0.307564	-0.435556	0.00556051	0.027674
Trim54	-0.123213	0.29608	-0.419293	0.0103957	0.04424
Eif2b4	-0.134328	0.322789	-0.457118	0.00379169	0.0207579
Nrbp1	-0.186393	0.447899	-0.634292	7.3424e-05	0.000775031
Mrpl33	-0.123168	0.295971	-0.419139	0.0046629	0.0244499
Babam2	-0.0787837	0.189316	-0.2681	0.0869944	0.207221
Ppp1cb	-0.0947105	0.227588	-0.322298	0.0483297	0.137155
Ctbp1	0.0246202	-0.0591619	0.083782	0.560791	0.715994
Maea	-0.0293474	0.0705214	-0.0998688	0.501968	0.669705
Fam193a	-0.0429862	0.103295	-0.146282	0.341243	0.519422
Add1	0.0267522	-0.0642851	0.0910373	0.507273	0.672064
Nop14	-0.134947	0.324276	-0.459223	0.00535225	0.0268861
Htra3	0.0316176	-0.0759765	0.107594	0.483202	0.654674
Ablim2	0.0127858	-0.030724	0.0435097	0.784078	0.873621
Afap1	0.0301797	-0.0725214	0.102701	0.475498	0.645642
Grpel1	-0.0348796	0.0838151	-0.118695	0.43886	0.611631
D5Ertd579e	-0.0513162	0.123312	-0.174628	0.237631	0.411065
Mrfap1	-0.180549	0.433857	-0.614405	0.000117235	0.00114749
Wfs1	0.125079	-0.300563	0.425642	0.00122494	0.0084723
Evc	0.130013	-0.31242	0.442433	0.0020455	0.0128291
Wdr1	-0.0381572	0.0916912	-0.129848	0.407421	0.582288
Qdpr	-0.1146	0.275382	-0.389982	0.0112323	0.0467529
Lap3	-0.0484891	0.116519	-0.165008	0.265227	0.442034
Med28	0.0816137	-0.196117	0.27773	0.0702934	0.178497
Adgra3	-0.0129238	0.0310557	-0.0439795	0.780076	0.870946
Ppargc1a	-0.082267	0.197686	-0.279953	0.0798848	0.195624
Dhx15	-0.104619	0.251397	-0.356016	0.0132544	0.0531162
Anapc4	-0.035202	0.0845899	-0.119792	0.416185	0.590632
Sel1l3	-0.0888424	0.213487	-0.302329	0.0442166	0.127868
Smim20	-0.0192579	0.0462765	-0.0655345	0.673017	0.796882
Rbpj	-0.112635	0.27066	-0.383295	0.0186145	0.068323
Tbc1d1	-0.114249	0.274538	-0.388786	0.00929193	0.0406963
Lias	-0.0798752	0.191939	-0.271814	0.0803696	0.196216
Smim14	-0.0453917	0.109076	-0.154467	0.318509	0.495551
Ube2k	-0.00351742	0.00845231	-0.0119697	0.936984	0.965189
Apbb2	-0.076538	0.18392	-0.260458	0.0760082	0.189288
Limch1	-0.152311	0.366001	-0.518312	0.00192406	0.0121857
Tmem33	-0.0159661	0.0383663	-0.0543324	0.727419	0.833474
Atp8a1	-0.127687	0.30683	-0.434517	0.00376805	0.0206986
Yipf7	-0.0325188	0.0781422	-0.110661	0.464389	0.636393
Slain2	-0.0111941	0.0268992	-0.0380933	0.802198	0.884404
Ociad1	-0.0524322	0.125994	-0.178426	0.259702	0.43576
Ociad2	-0.178785	0.429617	-0.608402	0.000177324	0.00165059
Sgcb	-0.0773708	0.185921	-0.263292	0.0789557	0.194392
Chic2	-0.0604213	0.145192	-0.205613	0.192621	0.356543
Kdr	0.197415	-0.474385	0.6718	2.25162e-05	0.0002808
Paics	-0.156777	0.376734	-0.533511	0.000809067	0.00592582
Polr2b	-0.00910501	0.0218792	-0.0309842	0.832983	0.90445
Igfbp7	-0.120614	0.289833	-0.410447	0.0123598	0.0503432
Grsf1	-0.024768	0.0595172	-0.0842852	0.588676	0.734976
Ankrd17	-0.0542918	0.130462	-0.184754	0.239273	0.412628
Parm1	-0.0475566	0.114278	-0.161834	0.293285	0.470965
Rchy1	-0.0897072	0.215565	-0.305272	0.0379705	0.11545
G3bp2	-0.0840059	0.201865	-0.285871	0.06539	0.17033
Uso1	-0.0648232	0.155769	-0.220592	0.186244	0.350177
Sdad1	-0.125229	0.300924	-0.426154	0.00676435	0.0318496
Art3	-0.17617	0.423333	-0.599503	0.00033976	0.00284496
Scarb2	-0.0963071	0.231424	-0.327732	0.0313904	0.100387
Stbd1	-0.22955	0.551605	-0.781154	2.74492e-06	4.28313e-05
Septin11	-0.00580498	0.0139493	-0.0197543	0.902058	0.946604
Ccni	-0.0475324	0.11422	-0.161752	0.307854	0.484763
Hnrnpd	0.0361709	-0.0869182	0.123089	0.366069	0.542418
Hnrnpdl	-0.0465446	0.111846	-0.158391	0.297774	0.474921
Sec31a	-0.0489868	0.117715	-0.166701	0.252199	0.426047
Cops4	-0.137656	0.330785	-0.468441	0.00162168	0.0105393
Coq2	0.018096	-0.0434845	0.0615805	0.707259	0.819386
Wdfy3	-0.0332293	0.0798494	-0.113079	0.484071	0.65491
Nudt9	-0.179793	0.43204	-0.611834	6.57844e-05	0.000704741
Sparcl1	0.0263835	-0.0633991	0.0897826	0.567705	0.721641
Atp5k	0.120954	-0.290651	0.411605	0.00485947	0.025154
Pcgf3	-0.0851272	0.204559	-0.289686	0.0740436	0.186117
Golga3	-0.0590176	0.141818	-0.200836	0.175685	0.338783
Pxmp2	-0.000100057	0.000240436	-0.000340493	0.998273	0.998582
Fbrsl1	0.0462515	-0.111142	0.157393	0.331447	0.510283
Ulk1	-0.103775	0.24937	-0.353145	0.0256482	0.0865662
Myo18b	-0.0681475	0.163757	-0.231905	0.146711	0.298346
Iscu	-0.0166148	0.0399251	-0.0565399	0.724797	0.83165
Acacb	0.0478534	-0.114991	0.162844	0.298164	0.474921
Ube3b	-0.0393032	0.094445	-0.133748	0.396449	0.572432
Mmab	-0.0600772	0.144365	-0.204442	0.198906	0.364623
Git2	0.0331151	-0.0795751	0.11269	0.474215	0.644661
Mlec	-0.23063	0.5542	-0.78483	3.44693e-06	5.3017e-05
Rnf10	-0.0128802	0.0309508	-0.043831	0.767305	0.862162
Coq5	0.0195844	-0.047061	0.0666454	0.651292	0.779427
Dynll1	0.0979865	-0.23546	0.333447	0.0425696	0.124547
Gatc	-0.0698137	0.167761	-0.237575	0.112321	0.24742
Cox6a1	0.0391797	-0.0941483	0.133328	0.372316	0.548622
Pxn	-0.0615883	0.147996	-0.209584	0.193913	0.358113
Rab35	0.113766	-0.273377	0.387142	0.0160319	0.0612818
Tmem233	-0.157241	0.377848	-0.535089	0.000714766	0.00533186
Hspb8	-0.297582	0.715085	-1.01267	1.45443e-10	4.84311e-09
Suds3	0.0736043	-0.17687	0.250474	0.101744	0.231758
Pebp1	-0.17386	0.417783	-0.591643	2.50163e-05	0.000303668
Nos1	-0.0899739	0.216206	-0.30618	0.0534367	0.147648
Plbd2	0.0470889	-0.113154	0.160243	0.291959	0.47032
Ptpn11	-0.0143313	0.0344379	-0.0487692	0.758072	0.856417
Adam1a	-0.0849137	0.204046	-0.28896	0.0609649	0.161998
Mapkapk5	-0.0830833	0.199648	-0.282731	0.0647162	0.169302
Aldh2	0.0733896	-0.176354	0.249744	0.0911924	0.213753
Acad12	0.0615488	-0.147901	0.20945	0.166029	0.325414
Ppp1cc	-0.0424233	0.101943	-0.144366	0.387935	0.564937
Pptc7	0.107521	-0.25837	0.365891	0.0228375	0.0796598
Arpc3	-0.0706642	0.169805	-0.240469	0.175553	0.338783
Anapc5	-0.20775	0.499219	-0.706969	1.17812e-05	0.000160562
Rnf34	-0.0617283	0.148332	-0.21006	0.183166	0.346587
Orai1	-0.0595152	0.143014	-0.202529	0.203387	0.370108
Psmd9	-0.0520422	0.125057	-0.177099	0.247728	0.421402
Mlxip	0.00171952	-0.00413197	0.00585148	0.969172	0.983
Clip1	-0.226547	0.54439	-0.770937	3.81207e-07	7.07642e-06
Rsrc2	-0.00403786	0.00970291	-0.0137408	0.921231	0.956162
Denr	-0.0645372	0.155082	-0.219619	0.153641	0.307472
Arl6ip4	-0.0454334	0.109176	-0.154609	0.313723	0.490953
Pitpnm2	-0.0254552	0.0611686	-0.0866238	0.586429	0.734173
Cdk2ap1	-0.13763	0.330724	-0.468354	0.00626218	0.030366
Sbno1	-0.00894316	0.0214903	-0.0304334	0.832535	0.90445
Kmt5a	-0.0439723	0.105665	-0.149637	0.362319	0.539554
Rilpl1	-0.0539214	0.129572	-0.183494	0.234709	0.407667
Tmed2	-0.0102265	0.0245741	-0.0348005	0.804714	0.885079
Ubc	-0.12466	0.299556	-0.424216	0.00481495	0.0249636
Slc15a4	-0.130434	0.31343	-0.443864	0.00581087	0.0285994
Ran	-0.0483126	0.116094	-0.164407	0.2729	0.450188
Mrps17	-0.0971751	0.23351	-0.330686	0.0312824	0.100141
Nipsnap2	0.133769	-0.321444	0.455212	0.00156813	0.0102531
Cct6a	-0.0479422	0.115205	-0.163147	0.344757	0.523784
Phkg1	-0.0537754	0.129221	-0.182997	0.26459	0.441667
Chchd2	-0.0431014	0.103572	-0.146673	0.294894	0.472119
Zbed5	-0.0619004	0.148746	-0.210646	0.151553	0.304684
Rabgef1	-0.138081	0.331807	-0.469888	0.00737725	0.0337514
Ndufa12-ps	-0.0397693	0.0955651	-0.135334	0.35383	0.532323
Tmem248	-0.0639987	0.153788	-0.217786	0.181323	0.344513
Sbds	-0.0614841	0.147745	-0.209229	0.175654	0.338783
Castor2	0.0509907	-0.12253	0.173521	0.251576	0.425441
Gtf2i	-0.0566472	0.136122	-0.19277	0.203518	0.370138
Eif4h	0.055953	-0.134454	0.190407	0.2044	0.371114
Eln	0.182277	-0.438009	0.620286	1.42515e-06	2.34858e-05
Mdh2	0.148995	-0.358032	0.507027	0.00160457	0.0104702
Hspb1	0.0711954	-0.171082	0.242277	0.10153	0.231435
Ywhag	-0.19234	0.462191	-0.654531	1.07574e-05	0.000147827
Polr2j	-0.109794	0.263833	-0.373627	0.0362669	0.111883
Cux1	-0.116756	0.280564	-0.39732	0.00364053	0.020274
Fis1	-0.0592777	0.142443	-0.201721	0.179792	0.342816
Mospd3	0.0287508	-0.0690877	0.0978384	0.518457	0.681847
Cops6	-0.0536441	0.128906	-0.18255	0.199165	0.364891
Lamtor4	-0.0615611	0.14793	-0.209491	0.150246	0.302931
Cox19	-0.0274527	0.0659685	-0.0934213	0.519409	0.681892
Mafk	0.018167	-0.043655	0.061822	0.69226	0.809851
Eif3b	-0.0224399	0.0539228	-0.0763627	0.619133	0.757787
Actb	0.0214448	-0.0515314	0.0729762	0.621127	0.759364
Zdhhc4	-0.105666	0.253914	-0.35958	0.0246489	0.0842498
Kdelr2	-0.123071	0.295737	-0.418808	0.0115794	0.0479506
Rac1	-0.10442	0.25092	-0.35534	0.0258616	0.0871044
Fam220a	-0.0629093	0.15117	-0.214079	0.191846	0.356332
Eif2ak1	-0.0917626	0.220504	-0.312267	0.0427073	0.12466
Aimp2	-0.275082	0.661018	-0.936099	1.22008e-10	4.23748e-09
Bri3	0.128959	-0.309887	0.438846	0.00176237	0.0112946
Pdap1	-0.0304266	0.0731147	-0.103541	0.503589	0.67076
Bud31	-0.042867	0.103009	-0.145876	0.318656	0.495551
Atp5j2	0.0855693	-0.205622	0.291191	0.0458058	0.131514
Gtf3a	-0.0306894	0.0737462	-0.104436	0.514864	0.678503
Polr1d	-0.128468	0.308708	-0.437176	0.00286648	0.0168325
Flt1	0.0918742	-0.220772	0.312646	0.0577987	0.156167
Pomp	-0.158295	0.38038	-0.538674	0.000843547	0.00612283
Ubl3	-0.0579467	0.139245	-0.197192	0.18042	0.343404
Hmgb1	-0.0297536	0.0714974	-0.101251	0.51197	0.675792
Hsph1	-0.0785449	0.188742	-0.267287	0.0895869	0.211216
Gng11	0.0649857	-0.15616	0.221145	0.155255	0.310318
Col1a2	-0.212036	0.50952	-0.721557	8.27298e-06	0.000117201
Casd1	-0.0503102	0.120895	-0.171205	0.309776	0.486898
Pon2	-0.0604402	0.145237	-0.205677	0.158151	0.314743
Pdk4	0.0211992	-0.0509414	0.0721405	0.642986	0.773788
Sem1	-0.0638907	0.153528	-0.217419	0.18979	0.354143
C1galt1	0.0707541	-0.170021	0.240775	0.0960219	0.222171
Ndufa4	0.0676726	-0.162616	0.230289	0.114775	0.250827
Tmem106b	0.0239428	-0.0575341	0.0814769	0.596446	0.741255
2610001J05Rik	0.0213175	-0.0512256	0.0725431	0.618203	0.756939
Cav1	0.102548	-0.246421	0.348969	0.0158504	0.0606597
Capza2	-0.180893	0.434682	-0.615575	0.000152144	0.00145505
Tspan12	0.193229	-0.464326	0.657555	1.81463e-06	2.91605e-05
Ndufa5	0.00227988	-0.00547852	0.00775841	0.957194	0.977161
Lmod2	0.0446377	-0.107264	0.151901	0.305188	0.482142
Arf5	-0.0397522	0.095524	-0.135276	0.391078	0.567978
Snd1	-0.0481373	0.115673	-0.163811	0.304629	0.48162
Calu	-0.0271135	0.0651534	-0.0922669	0.559732	0.715447
Flnc	-0.0268423	0.0645016	-0.0913439	0.53424	0.694534
Atp6v1f	-0.187476	0.450503	-0.637979	0.000108163	0.00107829
Tnpo3	-0.067438	0.162052	-0.22949	0.132529	0.276951
Ube2h	-0.0188947	0.0454037	-0.0642984	0.683501	0.803529
Klhdc10	0.00906252	-0.0217771	0.0308396	0.835778	0.904679
Mkln1	-0.144745	0.347819	-0.492564	0.000653415	0.00491965
Chchd3	0.0939215	-0.225692	0.319613	0.0389075	0.11742
Akr1b3	-0.192277	0.462039	-0.654316	1.46937e-05	0.000192148
Bpgm	-0.0147571	0.0354611	-0.0502182	0.730383	0.835684
Cald1	0.100573	-0.241676	0.342249	0.00927134	0.0406881
1810058I24Rik	-0.1202	0.288839	-0.409039	0.0153567	0.0594039
Trim24	-0.00745128	0.0179053	-0.0253566	0.859349	0.920019
Fmc1	0.109342	-0.262747	0.372088	0.00969282	0.0420239
Luc7l2	-0.0166359	0.0399759	-0.0566119	0.718679	0.826685
Kdm7a	0.00279414	-0.00671427	0.00950841	0.948987	0.972163
Ndufb2	0.0250627	-0.0602254	0.0852881	0.557143	0.712984
Mrps33	0.00645894	-0.0155207	0.0219797	0.883882	0.934785
Ssbp1	-0.0632401	0.151965	-0.215205	0.193485	0.357526
Gstk1	0.0585632	-0.140726	0.19929	0.171284	0.333081
Cul1	-0.0227821	0.054745	-0.077527	0.62839	0.764713
Rarres2	-0.0806962	0.193912	-0.274608	0.0867106	0.206782
Tmem176b	-0.194522	0.467433	-0.661955	0.000184154	0.00169948
Tmem176a	-0.0132371	0.0318085	-0.0450456	0.774536	0.866857
Malsu1	-0.230076	0.552869	-0.782944	1.92316e-06	3.06e-05
Cycs	0.219405	-0.527226	0.746631	1.96982e-07	3.78721e-06
Hnrnpa2b1	-0.202361	0.486271	-0.688632	5.78566e-06	8.45596e-05
Hibadh	0.100059	-0.240441	0.3405	0.0323187	0.102673
Tax1bp1	-0.0867214	0.20839	-0.295112	0.0540987	0.149094
Wipf3	0.0194498	-0.0467376	0.0661874	0.658031	0.784584
Znrf2	0.0197119	-0.0473674	0.0670794	0.640763	0.772263
Gars	-0.0025922	0.00622902	-0.00882122	0.95637	0.977161
Inmt	0.000874254	-0.00210082	0.00297507	0.983583	0.990371
Aqp1	-0.0575185	0.138216	-0.195735	0.217452	0.385917
Fkbp9	-0.0626472	0.15054	-0.213188	0.181988	0.345109
Nt5c3	-0.102449	0.246184	-0.348634	0.0249339	0.0849813
Pyurf	0.0266987	-0.0641565	0.0908552	0.524826	0.686033
Tigd2	-0.0215389	0.0517578	-0.0732967	0.645203	0.775299
Serbp1	-0.0189247	0.0454757	-0.0644004	0.670153	0.79493
Rpia	-0.040822	0.0980946	-0.138917	0.365603	0.542418
Smyd1	-0.233986	0.562265	-0.796251	9.30476e-08	1.86673e-06
Krcc1	0.00624326	-0.0150025	0.0212457	0.889441	0.937864
Rmnd5a	-0.131305	0.315524	-0.446829	0.00472605	0.024603
Chmp3	-0.0496717	0.11936	-0.169032	0.312537	0.489871
Reep1	-0.138775	0.333474	-0.472249	0.00582644	0.0285994
Mrpl35	0.0404684	-0.0972449	0.137713	0.340452	0.518708
Immt	0.0185489	-0.0445728	0.0631217	0.654284	0.781754
Ptcd3	0.0317856	-0.0763804	0.108166	0.458314	0.631012
St3gal5	0.143794	-0.345535	0.48933	0.000421573	0.00341273
Rnf181	-0.176721	0.424658	-0.601378	0.000414256	0.00337039
Vamp5	-0.173825	0.417698	-0.591523	0.000188205	0.001727
Vamp8	-0.0628211	0.150958	-0.213779	0.182846	0.346185
Mat2a	-0.023473	0.0564052	-0.0798782	0.572919	0.724595
Retsat	0.024912	-0.0598632	0.0847752	0.602326	0.744551
Tgoln1	-0.0259836	0.0624382	-0.0884218	0.550863	0.708033
Kcmf1	-0.242372	0.582416	-0.824787	3.63313e-08	8.09311e-07
Tmsb10	0.0434694	-0.104456	0.147926	0.31672	0.494403
Suclg1	0.00780605	-0.0187578	0.0265639	0.861764	0.921244
Mrpl19	0.0784905	-0.188612	0.267102	0.0728356	0.18394
Hk2	-0.0327031	0.0785852	-0.111288	0.433493	0.60614
Mrpl53	-0.0536792	0.12899	-0.182669	0.265793	0.442304
Dctn1	0.00520942	-0.0125181	0.0177276	0.914244	0.95323
Bola3	0.146013	-0.350868	0.496881	0.000346205	0.00288951
Dguok	0.0523872	-0.125886	0.178273	0.264455	0.441667
Tex261	-0.0300237	0.0721465	-0.10217	0.504142	0.670798
Dysf	-0.103925	0.249731	-0.353656	0.0375195	0.114653
Spr	0.109843	-0.263951	0.373795	0.0104387	0.0443645
Rab11fip5	-0.0399682	0.0960431	-0.136011	0.360816	0.538308
Cct7	-0.0753241	0.181003	-0.256327	0.108301	0.241249
Snrpg	0.00674404	-0.0162058	0.0229499	0.884428	0.934785
2310040G24Rik	-0.280811	0.674785	-0.955596	3.03908e-09	7.98067e-08
Pcbp1	-0.0538036	0.129289	-0.183093	0.233769	0.406958
Snrnp27	-0.0277056	0.0665763	-0.0942819	0.558899	0.714665
Anxa4	-0.135225	0.324943	-0.460168	0.00493582	0.025427
Nfu1	-0.0854139	0.205248	-0.290662	0.0739403	0.186029
Cnbp	-0.287609	0.691119	-0.978727	8.39288e-12	3.66338e-10
Copg1	-0.0643344	0.154595	-0.218929	0.150135	0.302931
Rab7	-0.083582	0.200846	-0.284428	0.0533942	0.147648
Rpn1	-0.123866	0.297649	-0.421515	0.00605683	0.0294632
Mgll	-0.00454177	0.0109138	-0.0154556	0.916793	0.954931
Podxl2	-0.0644654	0.154909	-0.219375	0.179156	0.342208
Tpra1	-0.0984539	0.236583	-0.335037	0.0452444	0.130249
Slc41a3	-0.101535	0.243986	-0.345521	0.0387253	0.117338
Fbln2	-0.0697244	0.167547	-0.237271	0.104332	0.236154
Slc6a6	-0.0935467	0.224791	-0.318338	0.0556803	0.151888
Suclg2	0.0582817	-0.14005	0.198332	0.1869	0.350472
Uba3	-0.0439583	0.105631	-0.14959	0.353838	0.532323
Arl6ip5	0.0414012	-0.0994866	0.140888	0.361468	0.538721
Lmod3	-0.0597314	0.143534	-0.203265	0.192278	0.356421
Mitf	-0.031899	0.0766527	-0.108552	0.466857	0.63869
Ppp4r2	-0.0187666	0.0450958	-0.0638624	0.679621	0.800574
Pdzrn3	0.0724891	-0.17419	0.246679	0.120336	0.258435
Itpr1	-0.311425	0.748349	-1.05977	4.02934e-11	1.58717e-09
Bhlhe40	-0.134953	0.32429	-0.459243	0.00324184	0.0187319
Arl8b	-0.0157831	0.0379267	-0.0537098	0.710394	0.820957
Lmcd1	0.116629	-0.280258	0.396886	0.00667784	0.031626
Thumpd3	0.0287884	-0.0691781	0.0979665	0.511555	0.675792
Arpc4	-0.053392	0.1283	-0.181692	0.222115	0.391185
Jagn1	-0.124388	0.298902	-0.423289	0.00919114	0.040446
Brk1	-0.0298676	0.0717713	-0.101639	0.494122	0.662647
Sec13	-0.105139	0.252648	-0.357787	0.0210138	0.075249
Timp4	0.0706295	-0.169722	0.240351	0.110939	0.245939
Cand2	-0.141605	0.340274	-0.481879	0.00230532	0.0141562
Tmcc1	-0.0853671	0.205136	-0.290503	0.0753065	0.188121
Cxcl12	-0.0156276	0.0375528	-0.0531804	0.708373	0.820051
Csgalnact2	-0.0582486	0.13997	-0.198219	0.201406	0.367746
Adipor2	-0.0897273	0.215613	-0.305341	0.0611795	0.162335
Wnk1	-0.116653	0.280315	-0.396968	0.0105555	0.0446261
Atp6v1e1	-0.127845	0.307211	-0.435056	0.0079722	0.0360647
Bcl2l13	-0.0155057	0.0372599	-0.0527655	0.724441	0.831537
Tuba8	-0.0400128	0.0961501	-0.136163	0.380472	0.557335
Mfap5	0.0242622	-0.0583017	0.0825639	0.581701	0.731388
Emg1	0.0322995	-0.0776152	0.109915	0.459435	0.632016
Phb2	0.0117697	-0.0282824	0.0400521	0.797768	0.882045
Grcc10	-0.0612096	0.147086	-0.208295	0.190204	0.354711
Tpi1	-0.28006	0.672981	-0.953041	1.03419e-10	3.63092e-09
Usp5	-0.0410236	0.0985792	-0.139603	0.371534	0.54822
Ptms	0.0351578	-0.0844837	0.119642	0.400589	0.576439
Mlf2	-0.0698238	0.167786	-0.237609	0.112715	0.247713
Gapdh	-0.285984	0.687215	-0.973199	6.89957e-11	2.63454e-09
Mrpl51	-0.0615245	0.147843	-0.209367	0.188885	0.352863
Vamp1	-0.202749	0.487203	-0.689952	0.000108934	0.00108263
Cd9	0.121006	-0.290775	0.411781	0.00355895	0.0199005
Ndufa9	0.110581	-0.265724	0.376305	0.0188313	0.0688846
Tigar	-0.150813	0.362402	-0.513215	0.00161441	0.0105132
Ccnd2	0.0429561	-0.103223	0.146179	0.354895	0.533097
Fkbp4	0.0446211	-0.107224	0.151845	0.33341	0.51235
2310001H17Rik	-0.0557165	0.133886	-0.189602	0.219968	0.388675
Ybx3	-0.151351	0.363695	-0.515046	0.000875381	0.00631134
Smim10l1	-0.0573549	0.137823	-0.195178	0.178059	0.341193
Lrp6	-0.0809383	0.194494	-0.275432	0.0779126	0.192917
Cdkn1b	-0.0358715	0.0861987	-0.12207	0.429368	0.602009
H2aj	-0.0556871	0.133815	-0.189502	0.22389	0.393666
Mgp	-0.0707876	0.170101	-0.240889	0.0985861	0.226545
Strap	-0.0651747	0.156614	-0.221788	0.169836	0.330968
Mgst1	0.0389919	-0.093697	0.132689	0.384822	0.561924
Aebp2	-0.0366949	0.0881772	-0.124872	0.440079	0.612432
Ldhb	0.331483	-0.796548	1.12803	8.5317e-17	7.066e-15
Abcc9	-0.190015	0.456604	-0.646619	1.25298e-05	0.000167236
Cmas	-0.028075	0.0674639	-0.095539	0.552815	0.709413
Kras	-0.0442622	0.106361	-0.150624	0.35196	0.530486
Sspn	-0.028874	0.0693838	-0.0982577	0.521913	0.683608
Fgfr1op2	-0.0807865	0.194129	-0.274915	0.0981256	0.226037
Ccdc91	-0.141567	0.340184	-0.481752	0.00147507	0.00976325
Ergic2	-0.103445	0.248577	-0.352022	0.0409004	0.121312
Tmtc1	0.0688855	-0.165531	0.234416	0.136154	0.281908
3300002P13Rik	-0.124119	0.298255	-0.422373	0.00748906	0.0342145
Cacng6	-0.213406	0.512812	-0.726218	8.92809e-07	1.55042e-05
Ndufa3	0.0987561	-0.23731	0.336066	0.0219957	0.0774766
Hspbp1	0.00352526	-0.00847114	0.0119964	0.936944	0.965189
Sbk2	-0.416091	0.999861	-1.41595	6.13091e-18	5.82436e-16
Fiz1	0.0452815	-0.108811	0.154092	0.319383	0.496442
U2af2	-0.0714578	0.171712	-0.24317	0.143769	0.293721
Epn1	0.0136364	-0.0327681	0.0464046	0.771361	0.864203
Zfp787	-0.068948	0.165681	-0.234629	0.100991	0.230693
Clcn4	-0.0189108	0.0454423	-0.0643531	0.677617	0.798797
Trim28	-0.0269501	0.0647608	-0.0917109	0.518253	0.681847
Chmp2a	-0.0720224	0.173069	-0.245091	0.121335	0.259358
Ube2m	0.0935253	-0.22474	0.318265	0.0291984	0.0949757
Selenow	-0.208822	0.501796	-0.710618	5.72979e-07	1.02818e-05
Ehd2	-0.0774018	0.185995	-0.263397	0.0935513	0.217546
Napa	-0.181201	0.435422	-0.616623	4.94079e-05	0.00054841
Tmem160	-0.0460597	0.110681	-0.15674	0.288731	0.467253
Ap2s1	-0.107308	0.25786	-0.365168	0.0127138	0.0513322
Slc1a5	0.0431352	-0.103653	0.146788	0.344262	0.523598
Calm3	-0.127036	0.305265	-0.432301	0.00418139	0.0226609
Foxa3	0.273389	-0.656949	0.930338	1.96328e-13	1.0569e-11
Sympk	-0.119484	0.287119	-0.406604	0.00896897	0.0396846
Dmwd	-0.049205	0.118239	-0.167444	0.315723	0.493126
Dmpk	0.0178755	-0.0429545	0.0608299	0.694627	0.811152
Snrpd2	0.0250525	-0.0602007	0.0852532	0.564804	0.718801
Rtn2	-0.242348	0.582358	-0.824706	3.78804e-08	8.38039e-07
Ckm	-0.261299	0.627898	-0.889198	3.67487e-09	9.57245e-08
A930016O22Rik	-0.0952993	0.229003	-0.324302	0.0287776	0.0941758
Gemin7	-0.0609071	0.146359	-0.207266	0.181686	0.344797
Clptm1	-0.0608847	0.146305	-0.20719	0.175865	0.338929
Apoe	0.0376642	-0.0905065	0.128171	0.406345	0.581007
Bcam	0.0797124	-0.191548	0.27126	0.0558858	0.152202
Ethe1	-0.0190503	0.0457776	-0.0648279	0.681988	0.802193
Rabac1	-0.224197	0.538742	-0.762939	6.85921e-07	1.22405e-05
Gsk3a	0.0360643	-0.086662	0.122726	0.404476	0.578848
Dmac2	0.0383932	-0.0922582	0.130651	0.423338	0.596849
Hnrnpul1	0.00308087	-0.00740328	0.0104841	0.944157	0.968751
Axl	-0.0690106	0.165831	-0.234842	0.173429	0.33623
Egln2	-0.109707	0.263625	-0.373332	0.0125099	0.0508262
Snrpa	0.038478	-0.092462	0.13094	0.375294	0.551908
Ltbp4	0.0322535	-0.0775048	0.109758	0.420776	0.594948
2310022A10Rik	0.0118609	-0.0285015	0.0403623	0.792549	0.879098
Akt2	-0.10303	0.247579	-0.350609	0.0230592	0.0803465
Psmc4	-0.197634	0.47491	-0.672544	2.046e-05	0.000259957
Dyrk1b	0.0857521	-0.206061	0.291813	0.0463019	0.132696
Supt5	-0.0187996	0.0451752	-0.0639748	0.655173	0.781754
Mrps12	-0.0763784	0.183536	-0.259914	0.0785015	0.193853
Sars2	-0.0489709	0.117676	-0.166647	0.288567	0.467253
Nfkbib	-0.0173005	0.0415729	-0.0588734	0.696711	0.812602
Sirt2	-0.0884419	0.212525	-0.300967	0.0523067	0.145522
Ech1	0.153328	-0.368444	0.521771	0.000237749	0.00210969
Eif3k	-0.0533109	0.128105	-0.181416	0.237731	0.411065
Ryr1	-0.111714	0.268447	-0.380161	0.0129363	0.0519057
Psmd8	-0.399625	0.960292	-1.35992	4.11474e-18	4.02745e-16
Mif-ps	-0.00441703	0.0106141	-0.0150311	0.921101	0.956162
Cox7a1	0.128389	-0.308517	0.436906	0.0013067	0.00884833
Capns1	-0.255525	0.614023	-0.869547	2.37798e-09	6.45452e-08
Tbcb	-0.117445	0.282218	-0.399663	0.00577966	0.0285885
Polr2i	0.0127422	-0.0306192	0.0433614	0.758314	0.856417
Sdhaf1	-0.0496577	0.119327	-0.168984	0.306132	0.483288
Hspb6	0.239643	-0.575859	0.815503	2.52336e-09	6.79204e-08
Psenen	-0.142774	0.343084	-0.485858	0.00258434	0.0155157
U2af1l4	-0.102878	0.247215	-0.350093	0.0325304	0.103013
Cox6b1	0.186431	-0.44799	0.634421	1.68444e-06	2.73404e-05
Tmem147	-0.057223	0.137506	-0.194729	0.173538	0.33623
Usf2	0.0838738	-0.201547	0.285421	0.0326737	0.103264
Fxyd1	-0.127527	0.306444	-0.433971	0.00286264	0.0168325
Scn1b	-0.0316541	0.0760642	-0.107718	0.475334	0.645642
Uba2	-0.0934091	0.224461	-0.31787	0.0498589	0.140039
Gpi1	-0.272294	0.654317	-0.926611	5.18435e-09	1.31854e-07
Lsm14a	-0.0863025	0.207384	-0.293686	0.0657488	0.170852
Kctd15	-0.0812746	0.195302	-0.276576	0.0762282	0.189398
Cebpg	-0.00337104	0.00810055	-0.0114716	0.943084	0.968265
Nudt19	-0.0668459	0.16063	-0.227476	0.11437	0.250111
Pdcd5	-0.0573953	0.13792	-0.195315	0.178465	0.3416
Uri1	-0.111492	0.267914	-0.379406	0.0135859	0.0539503
1600014C10Rik	-0.0233361	0.0560762	-0.0794123	0.5818	0.731388
Etfb	0.0867322	-0.208416	0.295148	0.0472874	0.134809
Etfbl	0.0768559	-0.184683	0.261539	0.0848907	0.203778
Josd2	-0.0235582	0.0566101	-0.0801683	0.570187	0.723655
Emc10	-0.0538237	0.129338	-0.183161	0.238778	0.412434
Mybpc2	-0.407934	0.980259	-1.38819	2.85505e-23	3.68873e-21
Atf5	0.173803	-0.417645	0.591448	2.92465e-05	0.000348583
Akt1s1	-0.0994191	0.238903	-0.338322	0.0567192	0.153823
Ptov1	0.0147109	-0.03535	0.0500609	0.752855	0.853422
Med25	-0.0295214	0.0709395	-0.100461	0.531514	0.69306
Prmt1	-0.0809195	0.194448	-0.275368	0.0603542	0.160712
Scaf1	-0.0914391	0.219727	-0.311166	0.0515269	0.143972
Rras	0.05684	-0.136586	0.193426	0.180201	0.34319
Prr12	-0.0352761	0.084768	-0.120044	0.402096	0.577232
Fcgrt	-0.0969811	0.233044	-0.330025	0.0338865	0.106141
Pih1d1	-0.0352158	0.0846229	-0.119839	0.424257	0.597884
Hrc	-0.162554	0.390614	-0.553168	0.000101344	0.00102614
Gys1	-0.0681894	0.163858	-0.232048	0.13965	0.287489
Ftl1	0.0396217	-0.0952103	0.134832	0.366799	0.54297
Nucb1	-0.0566095	0.136032	-0.192641	0.214958	0.382964
Ppp1r15a	-0.103475	0.248649	-0.352125	0.0185724	0.0682467
Bcat2	0.0418171	-0.100486	0.142303	0.333548	0.51235
Kdelr1	0.0339551	-0.0815936	0.115549	0.438935	0.611631
Emp3	-0.125326	0.301157	-0.426483	0.00581706	0.0285994
Nomo1	-0.0538852	0.129485	-0.183371	0.235751	0.409036
Kcnj11	-0.116887	0.280878	-0.397765	0.0135776	0.0539503
Myod1	-0.0107115	0.0257395	-0.036451	0.814693	0.892322
Kcnc1	-0.0724893	0.174191	-0.24668	0.132802	0.277279
Ldha	-0.461438	1.10883	-1.57027	3.13302e-28	7.99763e-26
Tsg101	-0.103916	0.249708	-0.353623	0.0284155	0.0935598
Csrp3	0.29335	-0.704917	0.998267	3.10317e-15	2.27801e-13
Ano5	-0.111462	0.267841	-0.379302	0.0179392	0.0665253
Cyfip1	0.00117645	-0.00282699	0.00400344	0.978953	0.989004
Nipa2	-0.0107527	0.0258385	-0.0365912	0.824591	0.899503
Herc2	-0.172807	0.415252	-0.588059	0.000402746	0.0033017
Ube3a	-0.0470745	0.113119	-0.160194	0.289317	0.467949
Snrpn	0.0086719	-0.0208384	0.0295103	0.845746	0.910959
Tarsl2	-0.0345792	0.0830933	-0.117673	0.473198	0.644072
Mef2a	-0.052599	0.126395	-0.178993	0.22266	0.39193
Synm	-0.2212	0.531541	-0.752741	8.47412e-08	1.72147e-06
Nr2f2	0.151303	-0.363579	0.514882	0.000219505	0.00196945
Slco3a1	-0.00152326	0.00366037	-0.00518363	0.974078	0.985845
Det1	-0.0122989	0.029554	-0.0418529	0.796092	0.882045
Mfge8	-0.0267067	0.0641758	-0.0908825	0.551527	0.70826
Ap3s2	-0.0822698	0.197693	-0.279963	0.0934967	0.217546
Idh2	0.133721	-0.321329	0.45505	0.00288937	0.0168906
Man2a2	-0.0976861	0.234738	-0.332424	0.0197333	0.0713035
Furin	-0.0153999	0.0370057	-0.0524056	0.744523	0.847361
Ndufab1-ps	0.0834278	-0.200476	0.283904	0.067858	0.17423
Iqgap1	-0.0973323	0.233888	-0.331221	0.0317538	0.101248
Sec11a	-0.0841958	0.202321	-0.286517	0.055103	0.150833
Alpk3	0.0951306	-0.228597	0.323728	0.0250754	0.085346
Fsd2	-0.0140025	0.0336477	-0.0476502	0.75201	0.853176
Homer2	0.0990448	-0.238003	0.337048	0.0191421	0.0697217
Btbd1	0.0419464	-0.100797	0.142743	0.355013	0.533097
Zfand6	0.0210326	-0.0505411	0.0715737	0.627258	0.763968
Ctsc	0.0184773	-0.0444008	0.0628781	0.689908	0.807978
Prss23	0.1373	-0.329929	0.467229	0.000652633	0.00491965
Me3	-0.0768246	0.184608	-0.261433	0.119209	0.256845
Hikeshi	-0.024704	0.0593635	-0.0840675	0.574061	0.725153
Picalm	-0.0266928	0.0641425	-0.0908353	0.578491	0.729608
Tmem126a	-0.0536707	0.12897	-0.182641	0.247523	0.421402
Ndufc2	0.0754797	-0.181377	0.256856	0.0884123	0.209057
Aamdc	-0.163631	0.393203	-0.556834	0.000266458	0.00233875
Clns1a	-0.13714	0.329546	-0.466686	0.00584385	0.0285994
Thap12	-0.145155	0.348806	-0.493961	0.00216134	0.0134253
Serpinh1	-0.00725302	0.0174289	-0.0246819	0.874328	0.928363
Tpbgl	-0.070733	0.16997	-0.240703	0.132559	0.276951
Spcs2	-0.154413	0.371051	-0.525464	0.00201552	0.0126903
Ppme1	-0.0244032	0.0586404	-0.0830436	0.608864	0.751046
Ucp3	-0.0782724	0.188088	-0.26636	0.0971209	0.224329
Ucp2	0.208275	-0.500483	0.708758	2.37235e-07	4.50746e-06
Mrpl48	0.00164778	-0.0039596	0.00560738	0.969305	0.983
Rab6a	-0.0805299	0.193512	-0.274042	0.0767123	0.190454
Plekhb1	-0.0769276	0.184856	-0.261783	0.0802444	0.196207
Arhgef17	-0.137841	0.331229	-0.46907	0.001896	0.0120316
Stard10	0.128211	-0.308089	0.4363	0.00339171	0.0192931
Clpb	-0.0039264	0.00943509	-0.0133615	0.928162	0.959649
Lamtor1	-0.163175	0.392108	-0.555283	0.000242002	0.00214155
Art1	-0.0847447	0.20364	-0.288385	0.0543894	0.149555
Pgap2	-0.0280605	0.067429	-0.0954895	0.534961	0.695062
Rhog	-0.00698782	0.0167916	-0.0237794	0.888786	0.93755
Stim1	-0.135932	0.326642	-0.462573	0.00547634	0.0274241
Hbb-bt	0.343461	-0.825331	1.16879	2.49646e-28	7.33052e-26
Hbb-bs	0.366076	-0.879674	1.24575	5.2713e-34	3.40526e-31
Smpd1	-0.0616696	0.148191	-0.209861	0.153525	0.307431
Ilk	-0.0603285	0.144969	-0.205297	0.193135	0.357085
Taf10	-0.0666343	0.160121	-0.226755	0.132902	0.277309
Tpp1	-0.0975138	0.234324	-0.331838	0.0465969	0.133193
Mrpl17	-0.112309	0.269876	-0.382185	0.0211279	0.0753236
Eif3f	-0.0214857	0.0516297	-0.0731154	0.633648	0.768563
Tmem9b	-0.0685537	0.164733	-0.233287	0.122523	0.261221
Dennd5a	0.0194652	-0.0467747	0.0662399	0.676836	0.798255
Ipo7	-0.113287	0.272227	-0.385513	0.0182466	0.0673562
Rnf141	-0.0130529	0.031366	-0.0444189	0.764313	0.860129
Eif4g2	-0.134233	0.322559	-0.456792	0.00427476	0.0231281
Usp47	-0.194396	0.467131	-0.661526	1.2325e-05	0.000166568
Mical2	-0.0665716	0.15997	-0.226542	0.143893	0.29379
Parva	0.0502314	-0.120705	0.170937	0.232135	0.404793
Tead1	-0.0141115	0.0339096	-0.0480211	0.762038	0.859212
Psma1	0.0446909	-0.107392	0.152083	0.285247	0.463688
Sox6	-0.149909	0.360228	-0.510137	0.00105494	0.0074145
1110004F10Rik	-0.0341362	0.0820287	-0.116165	0.41303	0.587444
Arl6ip1	0.00720631	-0.0173167	0.024523	0.875713	0.929528
Coq7	0.00489389	-0.0117599	0.0166538	0.917776	0.955031
Gde1	-0.030201	0.0725725	-0.102773	0.49417	0.662647
Knop1	-0.0734059	0.176393	-0.249799	0.127711	0.269259
Thumpd1	-0.0910227	0.218726	-0.309749	0.0447185	0.128965
Ppp1ccb	-0.067254	0.16161	-0.228864	0.152617	0.306153
Dcun1d3	-0.0681222	0.163697	-0.231819	0.142098	0.291229
Uqcrc2	0.149401	-0.359008	0.508408	0.000429428	0.00345898
Eef2k	-0.0223294	0.0536573	-0.0759867	0.598843	0.742302
Ndufab1	0.177075	-0.425508	0.602583	2.30134e-05	0.000284802
Rbbp6	-0.0592257	0.142318	-0.201544	0.170787	0.332515
Tnrc6a	0.000969271	-0.00232914	0.00329842	0.982728	0.990371
Lcmt1	-0.0866416	0.208198	-0.29484	0.0594571	0.159242
Rabep2	-0.112926	0.271359	-0.384284	0.00922407	0.0405357
Atp2a1	-0.233528	0.561164	-0.794692	2.11843e-07	4.04884e-06
Eif3c	-0.071042	0.170713	-0.241755	0.119197	0.256845
Mapk3	-0.0293817	0.0706038	-0.0999855	0.543049	0.702476
Ypel3	0.00784912	-0.0188613	0.0267104	0.858258	0.919155
Aldoa	-0.436653	1.04927	-1.48592	2.19189e-25	3.35432e-23
Fam57b	0.0378865	-0.0910406	0.128927	0.388925	0.565613
Taok2	0.0297321	-0.0714458	0.101178	0.508542	0.672917
Cdipt	-0.124546	0.299283	-0.42383	0.00590414	0.0288072
Tbc1d10b	-0.144003	0.346037	-0.49004	0.00489335	0.0252889
Mylpf	-0.378578	0.909717	-1.28829	9.06337e-15	5.85494e-13
Dctpp1	0.063043	-0.151491	0.214535	0.168949	0.329885
Bckdk	-0.0720293	0.173085	-0.245115	0.108842	0.241955
Fus	-0.0653423	0.157017	-0.222359	0.173576	0.33623
Cox6a2	0.196032	-0.471062	0.667094	7.74109e-06	0.000110149
Tial1	-0.030059	0.0722314	-0.10229	0.519149	0.681892
Bag3	-0.0531809	0.127793	-0.180974	0.235797	0.409036
Mcmbp	-0.0796388	0.191371	-0.27101	0.0791412	0.194392
Nsmce4a	-0.0920015	0.221078	-0.31308	0.0596482	0.159537
Tacc2	-0.010631	0.0255461	-0.0361771	0.804967	0.885079
Plekha1	-0.0902737	0.216926	-0.3072	0.0475739	0.135387
2310057M21Rik	-0.0808699	0.194329	-0.275199	0.0617196	0.163299
Acadsb	-0.0503875	0.12108	-0.171468	0.255788	0.430758
Bub3	-0.142578	0.342612	-0.48519	0.00258075	0.0155157
Oat	-0.106667	0.25632	-0.362987	0.0311881	0.0999381
Fam53b	-0.0454205	0.109145	-0.154565	0.330039	0.509086
Abraxas2	-0.0626796	0.150618	-0.213298	0.155603	0.310822
Zranb1	-0.0834199	0.200457	-0.283877	0.0584953	0.157319
Bccip	-0.134783	0.323881	-0.458664	0.00203455	0.0127852
Glrx3	-0.0362657	0.0871458	-0.123411	0.40362	0.578091
Mapk1ip1	-0.0834688	0.200574	-0.284043	0.0945743	0.21945
Ppp2r2d	0.0383198	-0.092082	0.130402	0.347871	0.526535
Bnip3	-0.0776101	0.186496	-0.264106	0.0843496	0.203017
Inpp5a	-0.0251603	0.0604598	-0.0856201	0.58399	0.733012
Echs1	0.0745661	-0.179181	0.253747	0.126779	0.267995
Psmd13	-0.186186	0.447402	-0.633588	7.87331e-05	0.000820348
Cox8b	0.0967899	-0.232585	0.329375	0.0292945	0.0951924
Ifitm2	-0.108901	0.261687	-0.370588	0.0254676	0.0862206
Ifitm3	-0.108395	0.260471	-0.368865	0.0133484	0.0533605
Hras	-0.0522083	0.125456	-0.177664	0.26975	0.446588
Taldo1	-0.0697673	0.16765	-0.237417	0.13217	0.276853
Pnpla2	0.157579	-0.37866	0.536238	0.00151959	0.00999649
Cd151	-0.14077	0.338268	-0.479038	0.00120847	0.00839434
Polr2l	-0.141896	0.340975	-0.482872	0.00141906	0.00947019
Ap2a2	-0.0471532	0.113308	-0.160462	0.305257	0.482142
Dusp8	0.0253552	-0.060928	0.0862832	0.588712	0.734976
Ctsd	-0.195172	0.468997	-0.664169	2.5102e-05	0.000303668
Tnni2	-0.252216	0.606072	-0.858288	1.95667e-08	4.61318e-07
Prr33	-0.0504157	0.121148	-0.171564	0.271665	0.448608
Tnnt3	-0.319048	0.766668	-1.08572	1.2074e-13	6.84194e-12
Mrpl23	0.0242128	-0.0581829	0.0823957	0.571788	0.724435
Nctc1	-0.0392433	0.0943012	-0.133545	0.402066	0.577232
H19	0.437489	-1.05128	1.48877	1.11307e-33	5.99204e-31
Cd81	-0.0402698	0.0967677	-0.137037	0.376701	0.553316
Cdkn1c	-0.000850949	0.00204482	-0.00289577	0.9851	0.99062
Nap1l4	-0.0548851	0.131888	-0.186773	0.249603	0.422768
Osbpl5	-0.115537	0.277634	-0.393171	0.0177335	0.06599
Ppp1r14c	-0.00760306	0.01827	-0.0258731	0.868096	0.924847
Esr1	-0.0496133	0.11922	-0.168833	0.302049	0.479185
Pcmt1	-0.123069	0.295734	-0.418804	0.00650948	0.0311953
Ginm1	0.0653187	-0.15696	0.222278	0.159228	0.315701
Tab2	0.0105828	-0.0254303	0.0360131	0.811907	0.889733
Epm2a	-0.0999223	0.240112	-0.340034	0.0416907	0.122754
Utrn	0.0107387	-0.025805	0.0365437	0.8045	0.885079
Sf3b5	-0.0866056	0.208112	-0.294718	0.0744088	0.186745
Ltv1	0.00855163	-0.0205494	0.0291011	0.850023	0.91396
Hivep2	-0.113206	0.272033	-0.385239	0.012491	0.0508134
Txlnb	0.0767396	-0.184404	0.261144	0.0839542	0.202367
Ifngr1	0.0227533	-0.0546758	0.0774291	0.615623	0.75613
Hbs1l	0.0122971	-0.0295498	0.041847	0.761124	0.85899
Sgk1	-0.0963051	0.23142	-0.327725	0.020036	0.0722279
Tbpl1	-0.013395	0.0321881	-0.0455831	0.763587	0.860129
9330159F19Rik	-0.0260533	0.0626057	-0.0886591	0.571321	0.724242
Echdc1	-0.0235437	0.0565751	-0.0801188	0.617249	0.75634
Hint3	-0.0642785	0.15446	-0.218739	0.117953	0.255244
Tpd52l1	0.0143425	-0.0344649	0.0488074	0.744315	0.847361
Trdn	-0.175984	0.422887	-0.598872	7.91266e-05	0.000821798
Rwdd1	-0.119945	0.288227	-0.408172	0.0069493	0.0323801
Amd2	-0.445825	1.07131	-1.51714	6.0197e-27	1.21523e-24
Hdac2	-0.039569	0.0950838	-0.134653	0.394035	0.570989
Rpf2	-0.0326001	0.0783376	-0.110938	0.487774	0.657559
Amd1	-0.438347	1.05334	-1.49169	3.31668e-27	7.14192e-25
Cdk19	-0.228599	0.549319	-0.777918	4.87093e-06	7.25028e-05
Cd164	-0.103609	0.24897	-0.352578	0.0227531	0.0795373
Snx3	-0.00798225	0.0191812	-0.0271635	0.856294	0.918575
Sec63	0.0142589	-0.034264	0.0485229	0.74376	0.847089
Sobp	-0.00745301	0.0179095	-0.0253625	0.871715	0.926806
Mtres1	0.00949632	-0.0228195	0.0323158	0.835335	0.904679
Cd24a	-0.0125635	0.0301899	-0.0427534	0.758122	0.856417
Qrsl1	-0.0564881	0.13574	-0.192228	0.209888	0.377261
Popdc3	-0.0505054	0.121364	-0.171869	0.293661	0.470965
Bves	-0.063881	0.153505	-0.217386	0.165499	0.324765
Gpx4-ps2	-0.21775	0.523249	-0.740998	8.53334e-07	1.48987e-05
Vgll2	0.0836442	-0.200996	0.28464	0.0521534	0.14522
Nus1	0.0266517	-0.0640438	0.0906955	0.54306	0.702476
Asf1a	-0.0591205	0.142066	-0.201186	0.205186	0.372123
Serinc1	-0.174414	0.419115	-0.593529	0.000539563	0.00420964
Smpdl3a	-0.0887965	0.213377	-0.302173	0.0786127	0.193862
Gcc2	-0.0693707	0.166697	-0.236067	0.137633	0.28388
Micu1	-0.00525587	0.0126298	-0.0178857	0.904727	0.948033
Anapc16	-0.0578479	0.139008	-0.196856	0.233986	0.406988
Ascc1	-0.127275	0.305839	-0.433114	0.0096404	0.0418528
Psap	-0.0093554	0.0224809	-0.0318363	0.839193	0.906856
Eif4ebp2	-0.184789	0.444046	-0.628835	3.20149e-05	0.000374667
Lrrc20	-0.194042	0.46628	-0.660322	3.01038e-05	0.000356173
Sar1a	-0.0239965	0.0576632	-0.0816597	0.62079	0.759239
Tysnd1	-0.00219984	0.00528617	-0.00748601	0.962267	0.9811
Vps26a	-0.071941	0.172873	-0.244814	0.111668	0.246709
Srgn	0.117974	-0.28349	0.401465	0.00642159	0.0308198
Kifbp	-0.13286	0.31926	-0.452119	0.00556	0.027674
Ddx50	-0.100379	0.241209	-0.341587	0.0184216	0.0677696
Hnrnph3	-0.00376168	0.00903926	-0.0128009	0.937698	0.965189
Mypn	-0.125645	0.301922	-0.427567	0.00529148	0.0267304
Dnajc12	-0.108075	0.259704	-0.367779	0.0162566	0.0618477
Ado	-0.0575557	0.138306	-0.195861	0.23067	0.403112
Ank3	-0.0463098	0.111282	-0.157592	0.293003	0.470965
Ccdc6	-0.1398	0.335937	-0.475736	0.0032507	0.0187496
Mrln	-0.150237	0.361018	-0.511255	0.00112918	0.00786043
Bicc1	-0.0947935	0.227787	-0.322581	0.0504468	0.141321
Tfam	-0.00967881	0.023258	-0.0329368	0.840668	0.907843
Ube2d1	-0.12958	0.311379	-0.440959	0.00531072	0.026738
Cisd1	-0.159507	0.383294	-0.542801	0.000556705	0.00431213
Specc1l	-0.055186	0.132611	-0.187797	0.240708	0.414217
Snrpd3	0.0101016	-0.0242739	0.0343754	0.820517	0.897272
Mif	-0.0609313	0.146417	-0.207348	0.186255	0.350177
Chchd10	0.0274137	-0.0658747	0.0932884	0.524253	0.686026
Col6a2	-0.0588024	0.141301	-0.200104	0.18667	0.350472
Pofut2	-0.0645072	0.15501	-0.219517	0.196779	0.362162
Sumo3	-0.106587	0.256126	-0.362713	0.0254925	0.0862206
Ube2g2	-0.0885959	0.212895	-0.301491	0.0497892	0.140039
Gatd3a	-0.0267272	0.064225	-0.0909522	0.570878	0.723964
Agpat3	0.0542385	-0.130334	0.184573	0.237624	0.411065
Rrp1	-0.00556877	0.0133817	-0.0189504	0.893473	0.939732
Tpgs1	-0.18416	0.442534	-0.626694	0.000421088	0.00341273
Cdc34	-0.0502627	0.12078	-0.171043	0.300603	0.477989
Bsg	-0.128951	0.309866	-0.438817	0.00722323	0.0332825
Polrmt	-0.0636828	0.153029	-0.216712	0.186425	0.350293
Rnf126	-0.0363046	0.0872395	-0.123544	0.425527	0.599098
R3hdm4	-0.0454037	0.109104	-0.154508	0.300396	0.477969
Wdr18	-0.107501	0.258323	-0.365823	0.0260075	0.0874134
Gpx4	-0.249474	0.599482	-0.848956	4.59319e-08	9.95706e-07
Stk11	-0.00139904	0.00336186	-0.0047609	0.97579	0.986479
Atp5d	0.144345	-0.34686	0.491205	0.0012489	0.00858284
Ndufs7	-0.0217996	0.0523841	-0.0741836	0.589125	0.734976
Uqcr11	0.0606793	-0.145812	0.206491	0.140805	0.288946
Csnk1g2	-0.0198029	0.047586	-0.0673888	0.693613	0.810644
Btbd2	-0.0275327	0.0661607	-0.0936935	0.585176	0.733457
Mknk2	-0.0127005	0.0305191	-0.0432195	0.787373	0.875373
Ap3d1	-0.167643	0.402843	-0.570486	0.000560121	0.00432821
Plekhj1	-0.0437154	0.105047	-0.148763	0.302822	0.479939
Jsrp1	-0.0993472	0.23873	-0.338077	0.0379948	0.11545
Oaz1	-0.237073	0.569683	-0.806757	8.90947e-09	2.19676e-07
Sgta	-0.0760385	0.182719	-0.258758	0.106899	0.239615
Map2k2	-0.121423	0.291777	-0.4132	0.0114788	0.0475951
Eef2	-0.0839031	0.201618	-0.285521	0.0427657	0.124669
Atcayos	0.00083974	-0.00201788	0.00285762	0.985818	0.991034
Pip5k1c	-0.0113295	0.0272246	-0.0385541	0.807511	0.885357
Fzr1	0.0307228	-0.0738264	0.104549	0.475537	0.645642
Nfic	-0.110469	0.265456	-0.375925	0.016416	0.0623075
Gna11	-0.0905408	0.217568	-0.308109	0.0739509	0.186029
Tle5	-0.0231637	0.055662	-0.0788256	0.601643	0.744236
Hcfc2	-0.0775123	0.186261	-0.263773	0.0834173	0.201477
Nfyb	0.015021	-0.0360952	0.0511162	0.739951	0.84377
Ric8b	0.017028	-0.040918	0.057946	0.690412	0.808275
Timp3	-0.00142943	0.0034349	-0.00486433	0.97389	0.985845
Hsp90b1	-0.0537918	0.129261	-0.183053	0.213625	0.381642
Fabp3-ps1	0.244143	-0.586671	0.830814	6.34183e-09	1.58792e-07
Nt5dc3	-0.10659	0.256134	-0.362723	0.0236475	0.0820423
Washc3	-0.0403737	0.0970174	-0.137391	0.395548	0.571898
Chpt1	0.0697414	-0.167588	0.237329	0.115396	0.251467
Mybpc1	-0.0407152	0.097838	-0.138553	0.366643	0.54297
Arl1	-0.0901719	0.216682	-0.306854	0.062957	0.165866
Slc25a3	0.180837	-0.43455	0.615387	9.27304e-06	0.000130226
Tmpo	-0.0325883	0.0783093	-0.110898	0.501539	0.66941
Snrpf	-0.0925654	0.222433	-0.314999	0.042814	0.124697
Metap2	-0.209668	0.503829	-0.713498	1.11398e-06	1.88386e-05
Vezt	-0.0686359	0.164931	-0.233567	0.127228	0.268592
Ndufa12	-0.0399517	0.0960034	-0.135955	0.330355	0.50931
Tmcc3	-0.0472675	0.113583	-0.160851	0.323848	0.500971
Cep83	0.0270111	-0.0649074	0.0919185	0.544448	0.70399
Socs2	-0.101126	0.243003	-0.344129	0.0316857	0.101131
Mrpl42	-0.00954753	0.0229426	-0.0324901	0.836863	0.905247
Ube2n	-0.0930285	0.223546	-0.316574	0.0364519	0.11224
Nudt4	-0.129435	0.311031	-0.440466	0.00349123	0.0196457
Eea1	0.0634929	-0.152572	0.216065	0.173632	0.33623
Dcn	-0.160811	0.386428	-0.547239	0.00149326	0.00986343
Atp2b1	-0.0407084	0.0978217	-0.13853	0.394747	0.571745
Myf6	-0.140828	0.338408	-0.479236	0.00254711	0.0153514
Nap1l1	-0.0518541	0.124605	-0.176459	0.273719	0.451078
Rab21	0.00114412	-0.00274931	0.00389344	0.980781	0.990057
Tspan8	-0.0552619	0.132794	-0.188056	0.229449	0.401691
Ptprb	-0.0627495	0.150786	-0.213536	0.205026	0.372041
Cct2	-0.0893136	0.214619	-0.303933	0.0660185	0.171139
Yeats4	-0.0764292	0.183658	-0.260087	0.103325	0.234211
Lyz2	0.00404431	-0.00971841	0.0137627	0.927379	0.959649
Mdm2	-0.074031	0.177895	-0.251926	0.113002	0.247792
Rap1b	-0.00409158	0.00983199	-0.0139236	0.93051	0.960546
Dyrk2	-0.0202699	0.0487083	-0.0689782	0.639374	0.772263
Tmbim4	-0.0562091	0.13507	-0.191279	0.206389	0.373258
Msrb3	-0.249718	0.60007	-0.849788	1.30565e-07	2.55832e-06
Rassf3	0.00249807	-0.00600282	0.00850088	0.954054	0.976115
Usp15	-0.0194812	0.0468131	-0.0662944	0.685741	0.804556
Ctdsp2	-0.0802821	0.192917	-0.273199	0.0981828	0.226037
Cdk4	-0.0225509	0.0541896	-0.0767405	0.618206	0.756939
Dtx3	0.00795681	-0.0191201	0.0270769	0.863208	0.922316
Dctn2	-0.000883332	0.00212263	-0.00300596	0.984766	0.990593
R3hdm2	0.0111438	-0.0267783	0.0379221	0.807485	0.885357
Stac3	-0.0449554	0.108027	-0.152983	0.274771	0.451479
Shmt2	-0.0127594	0.0306607	-0.0434201	0.762118	0.859212
Naca	-0.099282	0.238573	-0.337855	0.0391835	0.117842
Ptges3	-0.0265102	0.0637037	-0.090214	0.563521	0.718301
Atp5b	0.0540981	-0.129997	0.184095	0.188067	0.351757
Spryd4	-0.045601	0.109579	-0.15518	0.315701	0.493126
Cs	-0.00623749	0.0149886	-0.0212261	0.890689	0.938226
Coq10a	0.0549505	-0.132045	0.186996	0.213081	0.381302
Nabp2	-0.0609559	0.146476	-0.207432	0.136942	0.282816
Smarcc2	0.0204659	-0.0491792	0.069645	0.63107	0.766587
Myl6	-0.00175356	0.00421378	-0.00596734	0.967436	0.982418
Suox	-0.0371461	0.0892616	-0.126408	0.436399	0.609411
Rab5b	-0.0832532	0.200056	-0.283309	0.0770599	0.19117
Sarnp	-0.112073	0.26931	-0.381383	0.0157079	0.0604008
Cd63	-0.0646017	0.155237	-0.219839	0.121058	0.259358
Itga7	-0.0641197	0.154079	-0.218198	0.15844	0.314929
Zfp358	-0.0325898	0.0783127	-0.110902	0.495925	0.663561
Pet100	-0.0484912	0.116524	-0.165015	0.266386	0.442782
Map2k7	-0.0659345	0.15844	-0.224374	0.115964	0.251891
Timm44	0.0291816	-0.0701228	0.0993044	0.497678	0.665356
Elavl1	-0.00101829	0.00244695	-0.00346524	0.982153	0.990371
Arglu1	-0.0288703	0.0693748	-0.0982451	0.503249	0.670583
Col4a1	-0.0522848	0.12564	-0.177924	0.274488	0.451424
Col4a2	-0.08426	0.202476	-0.286736	0.0687429	0.175803
Naxd	-0.043178	0.103756	-0.146934	0.336077	0.515089
Arhgef7	0.0152783	-0.0367135	0.0519918	0.717211	0.825842
Lamp1	-0.11527	0.276992	-0.392261	0.00958089	0.0416504
Adprhl1	0.044963	-0.108045	0.153009	0.337568	0.516262
Dcun1d2	-0.0329594	0.0792009	-0.11216	0.471745	0.64347
Gas6	0.0231152	-0.0555454	0.0786606	0.599442	0.742302
Upf3a	-0.0386381	0.0928469	-0.131485	0.413651	0.587554
Myom2	-0.0934217	0.224491	-0.317913	0.0339125	0.106141
Agpat5	-0.0452352	0.1087	-0.153935	0.33879	0.517395
Vps36	-0.145704	0.350123	-0.495827	0.00151489	0.00998594
Mrps31	-0.0424925	0.102109	-0.144601	0.301365	0.478569
Smim19	-0.135	0.324403	-0.459403	0.00135099	0.00909101
Vdac3	-0.102698	0.246783	-0.349481	0.0212907	0.0756533
Polb	-0.067251	0.161603	-0.228854	0.121057	0.259358
Kat6a	-0.00313534	0.00753418	-0.0106695	0.93985	0.966173
Ank1	-0.159157	0.382452	-0.54161	0.00029557	0.0025595
Tm2d2	-0.0741803	0.178254	-0.252434	0.102039	0.232103
Plekha2	-0.0719378	0.172866	-0.244803	0.151388	0.304684
Ash2l	-0.0654561	0.15729	-0.222746	0.145893	0.296935
Fnta	-0.118168	0.283955	-0.402122	0.00623802	0.030299
Hook3	0.0434703	-0.104458	0.147929	0.298186	0.474921
Dusp26	-0.00462328	0.0111097	-0.0157329	0.913463	0.953223
Gsr	-0.0295227	0.0709426	-0.100465	0.472305	0.64369
Rbpms	0.0399125	-0.0959091	0.135822	0.384471	0.561665
Dctn6	-0.0604401	0.145237	-0.205677	0.203079	0.369963
Leprotl1	-0.0351948	0.0845727	-0.119768	0.486058	0.656341
Saraf	-0.139416	0.335015	-0.474431	0.00129459	0.00881377
Lonrf1	-0.161472	0.388014	-0.549486	0.00138788	0.00930051
Cnot7	0.0124978	-0.030032	0.0425298	0.787647	0.875373
Mtus1	-0.0544024	0.130728	-0.185131	0.218061	0.386785
Sorbs2	-0.162007	0.3893	-0.551307	0.000925276	0.00664143
Pdlim3	-0.338231	0.812765	-1.151	3.6323e-15	2.55051e-13
Slc25a4	0.122253	-0.293773	0.416026	0.00356114	0.0199005
Acsl1	0.249967	-0.600668	0.850635	1.05099e-08	2.57173e-07
Trappc11	-0.0224726	0.0540013	-0.0764739	0.61545	0.75613
Rwdd4a	0.0127893	-0.0307324	0.0435216	0.769894	0.863758
Asb5	-0.187528	0.450627	-0.638155	4.48058e-05	0.000502509
Fbxo8	-0.0331218	0.0795911	-0.112713	0.436039	0.609172
Clcn3	0.0214769	-0.0516086	0.0730855	0.61614	0.75613
Nek1	-0.00466711	0.011215	-0.0158821	0.921629	0.956268
Cpe	-0.0115342	0.0277164	-0.0392506	0.782345	0.872574
Msmo1	-0.0512961	0.123264	-0.17456	0.265387	0.442034
Lpl	0.453073	-1.08873	1.5418	2.16437e-36	2.33031e-33
Atp6v1b2	-0.0973483	0.233926	-0.331275	0.0249419	0.0849813
Ndufa13	-0.123181	0.296002	-0.419183	0.00584067	0.0285994
Gatad2a	-0.00615436	0.0147888	-0.0209432	0.901906	0.946604
Tmem161a	-0.176024	0.422982	-0.599006	0.000297715	0.00256432
Slc25a42	0.0557005	-0.133847	0.189548	0.209378	0.376554
Ddx49	-0.0112807	0.0271073	-0.0383879	0.806094	0.885079
Cope	-0.180214	0.433053	-0.613267	3.97741e-05	0.00045236
Rex1bd	-0.106688	0.25637	-0.363058	0.0168419	0.0634763
Uba52	0.0229547	-0.0551597	0.0781144	0.573927	0.725153
Kxd1	-0.016876	0.0405529	-0.0574289	0.687071	0.804948
Fkbp8	-0.107998	0.259519	-0.367517	0.0102057	0.0436615
Lsm4	-0.0394326	0.0947559	-0.134188	0.369698	0.54676
Jund	0.111936	-0.26898	0.380915	0.00873947	0.0389896
Rab3a	-0.02769	0.0665387	-0.0942287	0.535791	0.695861
Ccdc124	-0.0743886	0.178755	-0.253143	0.10854	0.241449
Map1s	-0.0263349	0.0632825	-0.0896174	0.549812	0.707877
Use1	-0.0577632	0.138804	-0.196567	0.203197	0.36997
Babam1	-0.0341115	0.0819695	-0.116081	0.433251	0.606064
Mrpl34	0.0462051	-0.11103	0.157235	0.317004	0.49441
Slc27a1	0.223626	-0.537371	0.760997	4.80423e-08	1.02766e-06
Colgalt1	-0.0843986	0.202809	-0.287207	0.0650139	0.169719
Tpm4	0.00664833	-0.0159758	0.0226242	0.880159	0.933433
Smim7	-0.0563786	0.135477	-0.191855	0.244106	0.418283
Tmem38a	-0.30057	0.722266	-1.02284	1.56824e-12	7.23631e-11
Tom1	-0.0541539	0.130131	-0.184285	0.186954	0.350472
Arhgap10	-0.0210395	0.0505576	-0.0715971	0.649501	0.778244
Lsm6	0.14444	-0.347087	0.491527	0.00141024	0.0094308
Smad1	-0.0366929	0.0881725	-0.124865	0.465288	0.636814
Otud4	-0.0463617	0.111406	-0.157768	0.270398	0.447431
Gab1	0.0334068	-0.0802761	0.113683	0.447359	0.619361
Usp38	-0.0987465	0.237286	-0.336033	0.0279686	0.0923707
Rnf150	-0.0631407	0.151726	-0.214867	0.166032	0.325414
Ndufb7	-0.0351126	0.0843751	-0.119488	0.440763	0.61312
Tecr	-0.464696	1.11666	-1.58135	9.78977e-28	2.25864e-25
Gipc1	0.0680378	-0.163494	0.231531	0.130207	0.273173
Prkaca	0.0494109	-0.118734	0.168145	0.267495	0.443764
Samd1	0.0243766	-0.0585765	0.0829531	0.589132	0.734976
D8Ertd738e	-0.153093	0.367881	-0.520974	0.00132209	0.0089338
Nfix	-0.0374966	0.0901037	-0.1276	0.419458	0.594492
Rad23a	-0.0153401	0.036862	-0.0522021	0.745851	0.848573
Calr	-0.0805254	0.193501	-0.274027	0.0808694	0.196969
Prdx2	0.0473275	-0.113727	0.161055	0.263727	0.441083
Asna1	-0.0515713	0.123925	-0.175496	0.249485	0.422768
Trir	-0.128427	0.308609	-0.437036	0.0068519	0.0321428
Gpt2	-0.266786	0.641083	-0.907869	2.14902e-09	5.98392e-08
Dnaja2	-0.129187	0.310435	-0.439622	0.00375869	0.0206986
Phkb	-0.164104	0.39434	-0.558445	0.000659433	0.00495342
Brd7	-0.027292	0.0655822	-0.0928742	0.547462	0.706191
Rbl2	-0.0060256	0.0144794	-0.020505	0.88856	0.93755
Aktip	0.0281475	-0.0676379	0.0957854	0.520259	0.682448
Fto	-0.0786107	0.1889	-0.267511	0.0811056	0.197267
Mmp2	-0.179761	0.431964	-0.611725	0.000160513	0.00151154
Amfr	-0.00483629	0.0116215	-0.0164578	0.917569	0.955031
Bbs2	0.0161147	-0.0387235	0.0548382	0.748855	0.850792
Mt1	0.147568	-0.354604	0.502172	0.00049629	0.00389087
Herpud1	-0.0299502	0.0719699	-0.10192	0.508431	0.672917
Fam192a	-0.0833085	0.200189	-0.283498	0.0579862	0.15634
Arl2bp	0.00554161	-0.0133164	0.018858	0.904887	0.948033
Ciapin1	-0.0401497	0.0964792	-0.136629	0.364793	0.541738
Coq9	0.0757126	-0.181936	0.257649	0.080488	0.196357
Polr2c	-0.129605	0.31144	-0.441045	0.00417763	0.0226609
Cnot1	-0.132531	0.31847	-0.451002	0.00588468	0.0287557
Sap18b	-0.266408	0.640174	-0.906582	1.94992e-09	5.52477e-08
Got2	0.113605	-0.27299	0.386595	0.0142004	0.0558692
Cdh5	0.0390474	-0.0938302	0.132878	0.372535	0.548695
Dync1li2	-0.00184897	0.00444305	-0.00629202	0.967837	0.982437
Ciao2b	-0.00719746	0.0172954	-0.0244928	0.866655	0.924825
Cbfb	-0.141277	0.339486	-0.480763	0.00274728	0.016342
Nol3	-0.094123	0.226176	-0.320299	0.0506899	0.141879
Fhod1	-0.075822	0.182199	-0.258021	0.113557	0.248839
Tppp3	-0.226827	0.545063	-0.77189	3.36881e-05	0.000392825
Atp6v0d1	-0.0645395	0.155088	-0.219627	0.152298	0.305764
Ctcf	-0.059705	0.14347	-0.203175	0.207205	0.373491
Nutf2	-0.0735661	0.176778	-0.250344	0.0883304	0.209016
Prmt7	-0.110852	0.266376	-0.377229	0.0218674	0.0771933
Vps4a	-0.173311	0.416464	-0.589776	0.000364063	0.00303073
Cog8	-0.0035802	0.00860316	-0.0121834	0.936182	0.965167
Terf2	0.0917982	-0.22059	0.312388	0.0343762	0.10723
Cyb5b	-0.0312333	0.0750532	-0.106287	0.463717	0.636011
Psmd7	-0.194704	0.46787	-0.662573	5.65444e-06	8.30175e-05
Zfhx3	-0.0344381	0.0827542	-0.117192	0.42178	0.595173
Ap1g1	-0.0659341	0.158439	-0.224373	0.150019	0.302931
Vac14	-0.008073	0.0193993	-0.0274723	0.858096	0.919155
Mtss2	-0.191908	0.461152	-0.653061	5.26026e-05	0.000577913
Aars	-0.127595	0.306609	-0.434204	0.00730825	0.0335308
Znrf1	0.012617	-0.0303185	0.0429355	0.775523	0.867061
Ldhd	0.150232	-0.361005	0.511236	0.000211813	0.00191105
Gabarapl2	-0.0936793	0.22511	-0.318789	0.0330327	0.103962
Kars	-0.119476	0.287099	-0.406574	0.00911706	0.0402297
Maf	-0.140962	0.33873	-0.479692	0.00155816	0.0102086
Cmc2	-0.0302018	0.0725745	-0.102776	0.510095	0.674696
Gcsh	-0.0925084	0.222296	-0.314805	0.0520437	0.14504
Cdh13	-0.136242	0.327388	-0.463631	0.0050781	0.025912
Hsbp1	-0.0506134	0.121623	-0.172237	0.237643	0.411065
Wfdc1	-0.075332	0.181022	-0.256354	0.124631	0.264667
Usp10	-0.0938583	0.22554	-0.319399	0.0496866	0.139919
Crispld2	-0.0874031	0.210028	-0.297431	0.0559474	0.152241
Cox4i1	0.103906	-0.249685	0.353591	0.0116991	0.0483223
Fbxo31	-0.0092076	0.0221257	-0.0313333	0.83284	0.90445
Map1lc3b	-0.202481	0.48656	-0.689041	2.69884e-05	0.000324062
Rnf166	-0.025035	0.0601588	-0.0851938	0.580994	0.731388
Aprt	0.0555693	-0.133532	0.189101	0.172215	0.334689
Trappc2l	0.00864662	-0.0207777	0.0294243	0.851417	0.914862
Cbfa2t3	0.0350563	-0.0842398	0.119296	0.439654	0.612104
Spg7	-0.114454	0.275031	-0.389485	0.0142339	0.0558692
Chmp1a	-0.120935	0.290604	-0.411538	0.00659355	0.0314745
Tcf25	-0.0794706	0.190967	-0.270437	0.0679653	0.174359
Def8	-0.0277661	0.0667214	-0.0944875	0.56315	0.718111
Acta1	-0.092459	0.222178	-0.314637	0.0190281	0.0694473
2810004N23Rik	0.0516902	-0.124211	0.175901	0.258525	0.434461
Gnpat	0.0603756	-0.145082	0.205457	0.157534	0.314095
Egln1	0.0767394	-0.184404	0.261143	0.0801068	0.196019
Tsnax	-0.0395968	0.0951504	-0.134747	0.403769	0.578091
Tomm20	0.0530051	-0.12737	0.180375	0.26121	0.437381
Nrp1	0.0127257	-0.0305797	0.0433055	0.797877	0.882045
Itgb1	-0.120316	0.289117	-0.409433	0.013418	0.0535064
Rpp14	-0.0831684	0.199852	-0.283021	0.0784914	0.193853
Pdhb	0.10507	-0.252482	0.357553	0.0140924	0.0556459
Thoc7	-0.091875	0.220774	-0.312649	0.0339792	0.106247
Psmd6	-0.114886	0.276069	-0.390955	0.0120046	0.0492692
Ngly1	-0.132173	0.317611	-0.449784	0.00472615	0.024603
Top2b	-0.01139	0.02737	-0.03876	0.800907	0.884089
Nr1d2	-0.0641769	0.154216	-0.218393	0.178096	0.341193
Ube2e1	-0.066287	0.159287	-0.225574	0.165112	0.324597
Rtraf	-0.165248	0.397087	-0.562335	9.38834e-05	0.000962678
Ecd	-0.0718609	0.172681	-0.244541	0.134776	0.279953
Mrps16	-0.0206945	0.0497287	-0.0704232	0.621445	0.759465
Anxa7	-0.169845	0.408135	-0.57798	0.000206493	0.00187351
Mss51	-0.397823	0.955962	-1.35378	3.46867e-14	2.07478e-12
Ppp3cb	-0.153868	0.369741	-0.523609	0.00106049	0.00743035
Myoz1	-0.306859	0.737379	-1.04424	7.04191e-11	2.64481e-09
Synpo2l	-0.0631858	0.151834	-0.21502	0.192335	0.356421
Sec24c	-0.00999777	0.0240245	-0.0340223	0.828886	0.90236
Chchd1	0.0152002	-0.0365258	0.051726	0.7354	0.839937
Camk2g	-0.0096643	0.0232232	-0.0328875	0.821341	0.897473
Vcl	-0.0987603	0.23732	-0.33608	0.0298859	0.0965315
Ap3m1	0.000676843	-0.00162644	0.00230329	0.987934	0.992235
Adk	0.115651	-0.277908	0.393559	0.00659697	0.0314745
Dupd1	-0.208361	0.500688	-0.709049	1.67234e-05	0.000215584
Vdac2	-0.178883	0.429853	-0.608736	5.92867e-05	0.000640455
Ppif	0.0868699	-0.208747	0.295617	0.0426569	0.12466
Zcchc24	-0.0835293	0.20072	-0.284249	0.0613718	0.162618
Asb14	-0.111033	0.26681	-0.377843	0.0211268	0.0753236
Appl1	-0.028182	0.067721	-0.095903	0.515855	0.679254
Lrtm1	0.193152	-0.46414	0.657292	1.24842e-05	0.000167236
Selenok	-0.224176	0.538691	-0.762866	5.16772e-08	1.09814e-06
Actr8	-0.0637938	0.153296	-0.21709	0.175403	0.338783
Mustn1	-0.302128	0.726008	-1.02814	1.24782e-10	4.27094e-09
Spcs1	-0.193239	0.46435	-0.657589	5.61505e-05	0.000612723
Smim4	-0.101297	0.243416	-0.344713	0.0238722	0.082556
Nisch	0.0246825	-0.0593116	0.083994	0.532292	0.693547
Sh3bp5	-0.00149057	0.00358181	-0.00507238	0.972153	0.98527
Ankrd28	0.0146057	-0.0350972	0.0497029	0.725692	0.832086
Dph3	-0.100951	0.242583	-0.343534	0.0245456	0.0839996
Timm23	-0.0587736	0.141232	-0.200006	0.173295	0.33623
3425401B19Rik	-0.0311982	0.0749689	-0.106167	0.460163	0.632748
Mapk8	0.00342578	-0.0082321	0.0116579	0.940528	0.966562
Glud1	-0.0297493	0.0714872	-0.101237	0.528607	0.689859
Sncg	0.0687974	-0.165319	0.234117	0.0882717	0.209016
Mmrn2	0.067172	-0.161413	0.228585	0.132356	0.276951
Bmpr1a	-0.088442	0.212525	-0.300967	0.072729	0.183814
Ldb3	-0.323269	0.776809	-1.10008	1.73046e-14	1.07488e-12
Wapl	-0.107314	0.257874	-0.365188	0.0176857	0.0659641
Ccser2	-0.203168	0.488211	-0.691379	5.33158e-06	7.86348e-05
Ghitm	0.0533146	-0.128114	0.181429	0.256934	0.432238
Psmc6	-0.103105	0.24776	-0.350865	0.0296231	0.0959004
Fermt2	-0.0605784	0.145569	-0.206147	0.162647	0.320726
Ubb-ps	-0.293949	0.706354	-1.0003	7.76148e-11	2.84882e-09
Cnih1	-0.0956157	0.229763	-0.325379	0.0242424	0.0833252
Cgrrf1	0.0339637	-0.0816142	0.115578	0.445346	0.617368
Samd4	-0.100433	0.24134	-0.341773	0.0423716	0.12408
Ktn1	-0.0666062	0.160054	-0.22666	0.15155	0.304684
Exoc5	-0.0598106	0.143724	-0.203535	0.21416	0.382175
Naa30	-0.00359422	0.00863685	-0.0122311	0.934386	0.964239
Klhl33	-0.050726	0.121894	-0.17262	0.303197	0.480298
Apex1	-0.113615	0.273016	-0.386631	0.0142527	0.0558692
Rnase4	-0.10979	0.263824	-0.373614	0.0180221	0.0667562
Ndrg2	-0.263276	0.632649	-0.895925	8.2546e-11	2.99577e-09
Hnrnpc	-0.0248537	0.0597232	-0.0845769	0.536895	0.696112
Tox4	-0.0484679	0.116468	-0.164936	0.279544	0.457642
Dad1	-0.291485	0.700433	-0.991918	1.48631e-09	4.28641e-08
Abhd4	-0.0654193	0.157202	-0.222621	0.172891	0.335801
Oxa1l	-0.0512535	0.123161	-0.174415	0.293498	0.470965
Psmb5	-0.172302	0.414039	-0.586341	0.000466428	0.00371075
Acin1	-0.00198455	0.00476884	-0.00675339	0.966884	0.982396
Dcaf11	-0.110153	0.264697	-0.37485	0.018752	0.0686721
Fitm1	-0.124179	0.298399	-0.422578	0.00720114	0.0332756
Psme1	0.0990084	-0.237916	0.336924	0.025822	0.0870618
Emc9	-0.00523779	0.0125863	-0.0178241	0.91126	0.952239
Nedd8	-0.121888	0.292894	-0.414781	0.00736029	0.0337216
Dhrs1	-0.0945455	0.227191	-0.321737	0.0388443	0.11742
Sdr39u1	-0.0453101	0.108879	-0.154189	0.315572	0.493126
Eef1akmt1	-0.116166	0.279144	-0.39531	0.00917539	0.0404318
Sap18	-0.266718	0.64092	-0.907638	2.30667e-09	6.31402e-08
Micu2	-0.00450433	0.0108238	-0.0153282	0.925359	0.958598
Mtmr6	-0.0405165	0.0973605	-0.137877	0.347127	0.5259
Mipep	-0.0512212	0.123084	-0.174305	0.267177	0.443465
Sgcg	-0.108864	0.2616	-0.370464	0.0191465	0.0697217
Kpna3	-0.0318743	0.0765935	-0.108468	0.484057	0.65491
Spryd7	-0.128175	0.308003	-0.436178	0.00583949	0.0285994
Ints6	-0.0793199	0.190605	-0.269925	0.116942	0.253676
Ctsb	-0.0948353	0.227888	-0.322723	0.0301829	0.0972535
Fdft1	0.130509	-0.313612	0.444121	0.00129713	0.00881377
Sox7	0.0968605	-0.232754	0.329615	0.0255194	0.0862213
Ccdc25	-0.0579214	0.139184	-0.197106	0.215225	0.383018
Ephx2	0.140144	-0.336764	0.476907	0.000254056	0.00224208
Trim35	0.0384665	-0.0924345	0.130901	0.35015	0.529487
Bnip3l	-0.0780628	0.187584	-0.265647	0.07984	0.195624
Ppp2r2a	-0.0360524	0.0866333	-0.122686	0.428113	0.600697
Slc25a37	0.125981	-0.30273	0.428711	0.0033992	0.0192931
Entpd4	-0.134367	0.322883	-0.45725	0.00143766	0.00957451
Entpd4b	-0.131403	0.31576	-0.447163	0.00175623	0.0112776
Fam160b2	-0.0688546	0.165456	-0.234311	0.152697	0.306153
Xpo7	-0.0744297	0.178854	-0.253283	0.138448	0.285195
Itm2b	-0.098422	0.236507	-0.334929	0.0341026	0.106529
Sucla2	0.0433896	-0.104265	0.147654	0.338393	0.517278
Esd	0.0209482	-0.0503382	0.0712864	0.640453	0.772263
Tpt1	-0.0161032	0.0386957	-0.0547989	0.69615	0.812343
Tsc22d1	-0.0203329	0.0488596	-0.0691924	0.627994	0.764576
Dnajc15	-0.07142	0.171621	-0.243041	0.107289	0.240321
Vwa8	0.0120604	-0.028981	0.0410415	0.788603	0.875835
Rgcc	-0.177711	0.427037	-0.604748	0.000190964	0.00174241
Wbp4	-0.152265	0.36589	-0.518155	0.000788391	0.00581394
Sugt1	-0.21824	0.524427	-0.742667	2.9818e-05	0.000354089
Uchl3	-0.055977	0.134512	-0.190489	0.218444	0.387252
Lmo7	0.0514374	-0.123603	0.175041	0.215154	0.383018
Mycbp2	-0.151286	0.363538	-0.514825	0.0033465	0.0191652
Gpr180	-0.120955	0.290653	-0.411608	0.0125626	0.0509125
Dnajc3	-0.101903	0.24487	-0.346773	0.0251372	0.0854557
Mbnl2	-0.0655358	0.157482	-0.223017	0.147889	0.300315
Ipo5	-0.110393	0.265274	-0.375667	0.0182778	0.0673941
Stk24	0.00760514	-0.018275	0.0258802	0.869561	0.925736
Tm9sf2	-0.0203804	0.0489738	-0.0693542	0.6332	0.768307
Clybl	0.0189239	-0.0454739	0.0643979	0.674093	0.796911
Pcca	-0.201573	0.484377	-0.685951	1.48886e-05	0.000193913
Alkbh8	-0.0150778	0.0362318	-0.0513096	0.729704	0.835203
Msantd4	0.0487765	-0.117209	0.165986	0.254426	0.428912
Dcun1d5	-0.0723858	0.173942	-0.246328	0.112373	0.24742
Cwc15	-0.118656	0.285128	-0.403784	0.00825077	0.0371687
Amotl1	-0.102288	0.245797	-0.348085	0.0296311	0.0959004
Chordc1	0.00773226	-0.0185805	0.0263128	0.861919	0.921244
Ubl5	-0.0422965	0.101638	-0.143935	0.364572	0.541659
Pin1	-0.0524429	0.126019	-0.178462	0.283326	0.46196
Eif3g	-0.0323293	0.0776869	-0.110016	0.452745	0.62459
Mrpl4	0.0205591	-0.0494033	0.0699624	0.628673	0.764713
Cdc37	-0.0524638	0.12607	-0.178534	0.267905	0.444217
Pde4a	0.0967756	-0.23255	0.329326	0.02898	0.0945311
Keap1	-0.037517	0.0901528	-0.12767	0.403605	0.578091
Slc44a2	-0.325979	0.783322	-1.1093	7.57535e-13	3.652e-11
Ilf3	0.00910891	-0.0218886	0.0309975	0.843713	0.909914
Carm1	-0.116855	0.280802	-0.397657	0.0117153	0.0483275
Timm29	-0.0189348	0.0455001	-0.0644349	0.68606	0.804638
Ecsit	-0.152676	0.366879	-0.519556	0.000269127	0.00234941
Pigyl	0.0393566	-0.0945734	0.13393	0.336163	0.515089
Rp9	0.0398325	-0.095717	0.135549	0.361314	0.538721
Septin7	0.00349752	-0.00840449	0.011902	0.939025	0.965632
Eepd1	-0.0446033	0.107181	-0.151784	0.336528	0.515404
Acad8	0.00560712	-0.0134738	0.019081	0.898257	0.943535
Zbtb44	-0.035276	0.0847678	-0.120044	0.452776	0.62459
Aplp2	-0.0729816	0.175374	-0.248355	0.112663	0.247713
Srpr	-0.093647	0.225032	-0.318679	0.0427239	0.12466
Stt3a	-0.0324867	0.0780651	-0.110552	0.46055	0.633011
Ei24	-0.0380642	0.0914677	-0.129532	0.398813	0.574304
Pknox2	0.117472	-0.282283	0.399755	0.00582291	0.0285994
Esam	-0.0544704	0.130892	-0.185362	0.200725	0.367125
Hspa8	-0.0098055	0.0235625	-0.033368	0.824985	0.899629
Sorl1	0.025825	-0.062057	0.087882	0.568606	0.722217
Sc5d	-0.115906	0.278521	-0.394428	0.00988035	0.0426082
Arhgef12	0.0376268	-0.0904167	0.128044	0.393019	0.570284
Usp2	-0.0251984	0.0605515	-0.0857499	0.56447	0.718668
Slc37a4	-0.24162	0.580609	-0.822229	8.53122e-08	1.72224e-06
Arcn1	-0.0568545	0.136621	-0.193475	0.201629	0.367945
Atp5l	0.0581259	-0.139676	0.197802	0.190871	0.355404
Scn4b	-0.137246	0.329801	-0.467047	0.00374027	0.0206514
Fxyd6	0.181031	-0.435014	0.616045	9.35568e-06	0.000130817
Bace1	-0.177078	0.425517	-0.602595	0.000293726	0.00255036
Rexo2	0.00796424	-0.019138	0.0271022	0.84105	0.907951
Rbm7	-0.000372915	0.00089611	-0.00126903	0.99331	0.996085
Sdhd	0.048258	-0.115963	0.164221	0.266558	0.442782
Timm8b	-0.0859976	0.206651	-0.292648	0.0562186	0.152722
Dlat	0.215379	-0.517553	0.732932	9.49499e-07	1.61415e-05
Hspb2	-0.0440644	0.105886	-0.14995	0.362853	0.539601
Cryab	0.181526	-0.436205	0.617731	3.74916e-06	5.65877e-05
Arhgap20	-0.046898	0.112695	-0.159593	0.3218	0.498759
Fdx1	0.00977213	-0.0234823	0.0332544	0.83987	0.907285
Rdx	-0.194231	0.466733	-0.660964	0.000115412	0.00114
Acat1	0.0477814	-0.114818	0.162599	0.30948	0.486669
Cul5	-0.0359467	0.0863793	-0.122326	0.411189	0.586235
Cib2	-0.122494	0.294351	-0.416845	0.00668748	0.031626
Idh3a	0.128021	-0.307632	0.435652	0.0023405	0.014345
Dnaja4	0.0846387	-0.203386	0.288024	0.0404673	0.120248
Psma4	-0.0723897	0.173951	-0.246341	0.126364	0.267468
Etfa	0.135982	-0.326762	0.462743	0.00125263	0.00859025
Tspan3	-0.0364972	0.0877023	-0.1242	0.397853	0.573435
Imp3	-0.0747042	0.179513	-0.254217	0.102562	0.233129
Commd4	-0.0501287	0.120458	-0.170587	0.238507	0.412186
Cox5a	0.0573998	-0.137931	0.195331	0.206531	0.373295
Scamp2	-0.0996868	0.239546	-0.339233	0.0264498	0.0884397
[truncated: 1,231 more rows]
