# Supplementary material for: Compartment-specific remodeling of skeletal muscle in Duchenne muscular dystrophy
Source: Research Square preprint supplement (doi:10.21203/rs.3.rs-8852148/v1), 2026-02-23
Supplement: Supplementary file 3 [file a6e8b4b05cc276d054ba272b.xlsx]

## Sheet: Sheet1
	gene	pval model	pval	mean_expression_controls_central	mean_expression_controls_pd	mean_expression_DMD_central	mean_expression_DMD_pd	mean_expression_DMD	mean_expression_controls	fdr pval model	fdr	log2FC_DMD-central_controls-central	log2FC_DMD-central_controls-pd	log2FC_DMD-pd_controls-central	log2FC_DMD-pd_controls-pd	log2FC_DMD_controls
0	Mrpl15	0.152113	0.0633419	12.8999	11.1194	12.3829	12.7449	12.6103	12.3767	0.161735	0.161048	-0.0546824	0.14307	-0.0161836	0.181569	0.0249782
1	Lypla1	0.0399209	0.861898	4.24011	4.93907	4.71038	5.29704	5.07896	4.4455	0.0445762	0.911754	0.12399	-0.0566507	0.265078	0.0844369	0.158759
2	Atp6v1h	1.3292e-12	0.412582	2.84139	3.51602	4.90957	6.21501	5.72974	3.03964	2.44442e-12	0.569673	0.621424	0.388002	0.909373	0.675951	0.736326
3	Rb1cc1	0.0529824	0.0454556	9.80531	8.73504	7.73375	8.91281	8.47452	9.4908	0.0585861	0.128567	-0.307068	-0.156586	-0.124376	0.0261069	-0.147001
4	Pcmtd1	0.0359416	0.626106	22.8298	23.3516	21.1325	20.9473	21.0161	22.9831	0.0402806	0.74684	-0.106598	-0.137848	-0.118725	-0.149976	-0.123459
5	Vcpip1	3.72714e-42	0.220006	0.38291	0.605167	3.47326	4.28779	3.98501	0.448222	5.29378e-41	0.370385	1.69362	1.4786	1.93496	1.71994	1.78331
6	Cops5	9.14675e-06	0.0584523	8.3561	9.36971	11.1513	10.4426	10.706	8.65396	1.23434e-05	0.153365	0.377129	0.228733	0.29043	0.142034	0.278057
7	Arfgef1	0.000181787	0.167834	7.16677	7.19724	5.00996	6.11084	5.70161	7.17572	0.000231776	0.308849	-0.442409	-0.447783	-0.199746	-0.205119	-0.286838
8	Sulf1	2.94466e-41	0.48419	0.88947	1.49442	5.1849	6.25414	5.85667	1.06724	3.95811e-40	0.632281	1.71077	1.31005	1.94082	1.5401	1.7298
9	Slco5a1	2.46919e-15	0.544758	4.75457	5.60175	6.91627	8.18739	7.71488	5.00352	6.16537e-15	0.68281	0.460111	0.261971	0.674947	0.476806	0.537671
10	Tram1	3.74155e-50	0.0271855	8.52828	8.61836	20.3262	24.2903	22.8168	8.55475	8.32519e-49	0.090392	1.16234	1.14876	1.4083	1.39472	1.31769
11	Eya1	0.102092	0.104696	8.55688	8.12269	8.42224	9.97638	9.39867	8.42929	0.110228	0.225592	-0.02047	0.0466108	0.199791	0.266872	0.141177
12	Stau2	0.0291929	0.259354	8.54075	8.57575	8.10319	7.20526	7.53905	8.55104	0.0329251	0.415142	-0.0677311	-0.0730128	-0.217554	-0.222836	-0.161583
13	Eloc	0.00740535	0.103757	26.225	26.7883	30.6293	28.066	29.0188	26.3905	0.00866754	0.224022	0.216332	0.186788	0.0944003	0.0648562	0.132193
14	Tmem70	0.0290302	0.722618	6.5294	6.50019	5.41144	5.62853	5.54783	6.52082	0.0327502	0.816948	-0.231886	-0.226278	-0.183847	-0.178239	-0.199872
15	Jph1	7.26276e-10	0.916982	18.1868	23.7993	17.094	22.8804	20.7294	19.8361	1.15537e-09	0.94733	-0.0846067	-0.454792	0.315713	-0.0544724	0.060565
16	Ogfrl1	0.00163319	0.66455	1.40659	1.69745	2.45459	2.50726	2.48768	1.49206	0.00198376	0.776025	0.521524	0.356921	0.543352	0.378748	0.484928
17	Smap1	2.58626e-14	0.446036	0.3556	0.561092	1.32884	1.77034	1.60622	0.415986	5.58684e-14	0.600493	0.780677	0.577053	1.03113	0.827505	0.880151
18	Sdhaf4	0.00650427	0.10612	7.28102	5.51103	7.67071	7.25455	7.40925	6.76089	0.00764122	0.227797	0.0663427	0.413265	-0.00461877	0.342304	0.115755
19	Lmbrd1	0.00219182	0.532188	4.17018	4.28178	2.74282	3.26376	3.07011	4.20297	0.00264721	0.672196	-0.466088	-0.4969	-0.278089	-0.3089	-0.354269
20	Phf3	0.711075	0.405201	3.35922	3.34345	2.90236	3.45927	3.25225	3.35459	0.717643	0.563343	-0.159723	-0.154496	0.0327361	0.0379632	-0.0343099
21	Ptp4a1	1.90341e-21	0.631378	6.62541	6.52369	2.95912	3.19395	3.10666	6.59552	8.64192e-21	0.750392	-0.945637	-0.926261	-0.862507	-0.843131	-0.887185
22	Dst	0.00155628	0.160927	31.574	33.8112	30.9955	36.8717	34.6873	32.2315	0.00189304	0.300026	-0.0258526	-0.121683	0.217397	0.121567	0.102863
23	Ccdc115	1.50282e-20	0.719406	0.256283	0.525996	1.55756	1.72781	1.66452	0.335541	6.51093e-20	0.814607	1.02561	0.745018	1.11858	0.837992	0.996455
24	Fam168b	7.4469e-07	0.215629	0.396161	0.612346	0.834223	1.45867	1.22655	0.459689	1.05753e-06	0.365689	0.393703	0.186008	0.816412	0.608716	0.609146
25	Plekhb2	0.0080197	0.0108864	17.7955	16.8926	17.1873	19.8106	18.8355	17.5302	0.00936602	0.0504102	-0.0474561	0.0235678	0.146928	0.217952	0.0982021
26	Hs6st1	6.37564e-12	0.0831427	1.67996	1.91899	2.91051	4.1745	3.70464	1.7502	1.12282e-11	0.193681	0.545145	0.421891	0.949207	0.825952	0.774547
27	Uggt1	0.151157	0.395161	3.16781	4.32956	3.298	3.79025	3.60727	3.5092	0.160799	0.553693	0.0443757	-0.310352	0.200812	-0.153916	0.0310393
28	Lman2l	5.79148e-28	0.119153	0.366549	0.29655	2.20307	2.72955	2.53384	0.34598	3.5584e-27	0.24623	1.22892	1.30477	1.44846	1.52432	1.39258
29	Cnnm4	0.0353065	0.423543	0.330951	0.404288	0.434433	0.671282	0.583239	0.352501	0.039595	0.57955	0.108024	0.0306424	0.328498	0.251117	0.227249
30	Ankrd23	1.62311e-26	0.0143838	162.096	168.332	246.642	222.502	231.476	163.928	9.27087e-26	0.0599699	0.602535	0.548407	0.454567	0.400439	0.49524
31	Cox5b	0.309319	0.17156	135.103	128.825	135.186	139.714	138.031	133.258	0.320722	0.312986	0.000880639	0.0690158	0.048068	0.116203	0.0503973
32	Actr1b	0.000135398	0.00199409	77.7245	74.8425	63.9182	74.926	70.8341	76.8776	0.000173722	0.0182954	-0.278191	-0.224385	-0.0522193	0.00158676	-0.11654
33	Coa5	7.65825e-06	0.0182693	41.6064	42.461	41.7463	48.2688	45.8442	41.8575	1.03609e-05	0.0700957	0.00473005	-0.0239217	0.209605	0.180953	0.128322
34	Unc50	5.40467e-05	0.460846	1.38384	1.27216	2.19974	2.41453	2.33469	1.35102	7.04152e-05	0.612784	0.424664	0.49389	0.518399	0.587624	0.504262
35	Tsga10	0.0872372	0.920769	0.337221	0.412587	0.53254	0.628244	0.592668	0.359368	0.0947051	0.949975	0.196687	0.117585	0.28408	0.204978	0.22851
36	Mrpl30	0.476178	0.76721	18.9558	18.9317	18.1393	17.6529	17.8337	18.9487	0.486861	0.847961	-0.0602664	-0.0585237	-0.0974037	-0.095661	-0.082975
37	Txndc9	1.97951e-07	0.377244	10.8895	11.1136	13.2948	14.54	14.0771	10.9554	2.8748e-07	0.537878	0.265796	0.23886	0.386295	0.359359	0.334701
38	Eif5b	0.00333698	0.0109746	22.2299	20.071	16.6533	20.123	18.8332	21.5955	0.00398735	0.0507085	-0.396047	-0.255327	-0.137168	0.00355174	-0.188118
39	Rev1	1.47891e-15	0.404795	0.276038	0.338782	1.10216	1.36228	1.26559	0.294476	3.80764e-15	0.563302	0.720201	0.650951	0.88851	0.81926	0.807517
40	Pdcl3	0.0161516	0.031472	4.34855	5.71052	4.28372	4.07581	4.1531	4.74878	0.0185254	0.0997349	-0.0175946	-0.344871	-0.0755088	-0.402785	-0.157815
41	Tbc1d8	1.84431e-20	0.310507	0.239134	0.531712	1.36397	1.96728	1.74301	0.325111	7.94893e-20	0.471386	0.93188	0.626067	1.25981	0.953997	1.04965
42	Cnot11	0.00265728	0.42052	5.12673	5.07111	6.08071	6.64771	6.43694	5.11039	0.00319443	0.577006	0.208776	0.221933	0.319911	0.333068	0.283446
43	Map4k4	4.67548e-51	0.00268349	0.2632	0.493168	5.19171	7.85665	6.86602	0.330778	1.08273e-49	0.0214327	2.29326	2.05196	2.80968	2.56838	2.56336
44	Slc9a2	4.20277e-06	0.00845451	5.17132	4.94069	3.13125	4.42159	3.94194	5.10355	5.76747e-06	0.0431692	-0.579001	-0.524051	-0.186863	-0.131913	-0.304572
45	Tmem182	8.45358e-25	0.971595	39.4696	43.8528	50.6373	55.1085	53.4464	40.7576	4.44975e-24	0.982432	0.351577	0.203216	0.471381	0.323021	0.382798
46	Mrps9	8.43076e-12	0.564976	3.4057	3.33473	1.20185	1.45681	1.36204	3.38485	1.47257e-11	0.699611	-1.00065	-0.977224	-0.842583	-0.819154	-0.892494
47	Tgfbrap1	0.000385875	0.376993	0.275568	0.346507	0.556905	0.834076	0.731044	0.296414	0.000484447	0.537696	0.287541	0.209459	0.523914	0.445832	0.417116
48	AI597479	7.46639e-25	0.0334053	0.434191	0.432968	1.88041	2.67156	2.37747	0.433832	3.94718e-24	0.103705	1.00604	1.00727	1.35616	1.35739	1.23607
49	Tpp2	8.10249e-09	0.251862	10.0495	11.1812	13.8293	13.6746	13.7321	10.3821	1.23855e-08	0.406587	0.424472	0.283796	0.409342	0.268666	0.372204
50	Mettl21c	5.23473e-19	0.00203327	4.92731	7.82606	2.68814	3.36217	3.11161	5.77913	2.08071e-18	0.0183944	-0.684485	-1.25888	-0.44233	-1.01672	-0.721396
51	Col3a1	6.46038e-80	0.000575832	10.4573	11.5187	75.4067	101.499	91.7997	10.7692	9.83131e-78	0.00879434	2.73743	2.60962	3.16127	3.03346	2.9791
52	Col5a2	5.26742e-68	0.00817446	1.15429	1.74184	13.6099	18.2334	16.5147	1.32695	3.64951e-66	0.0422967	2.76166	2.41373	3.15833	2.8104	2.91206
53	Slc40a1	4.82538e-48	0.0165634	4.92632	3.74645	0.493147	0.545418	0.525987	4.5796	9.4533e-47	0.0656834	-1.98878	-1.66849	-1.93914	-1.61885	-1.87042
54	Cavin2	0.268507	0.382965	4.86744	4.01004	4.97257	4.70735	4.80594	4.61549	0.279836	0.543394	0.0256203	0.25353	-0.0399122	0.187998	0.0481178
55	Gls	0.000257342	0.796309	8.51834	9.4383	9.72608	10.8864	10.4551	8.78868	0.00032601	0.866574	0.172341	0.0392356	0.320529	0.187424	0.2268
56	Hibch	3.42939e-13	0.552652	2.77564	3.07325	0.907488	0.897554	0.901247	2.86309	6.58523e-13	0.689864	-0.985047	-1.09451	-0.99258	-1.10204	-1.02281
57	Mstn	2.0443e-40	0.0322331	5.71264	7.11702	1.52705	1.53876	1.53441	6.12533	2.65168e-39	0.101437	-1.40942	-1.68349	-1.40276	-1.67683	-1.49131
58	Ormdl1	3.16233e-15	0.665129	2.54291	2.91474	5.30118	5.38759	5.35547	2.65218	7.77312e-15	0.776025	0.830688	0.686705	0.850337	0.706353	0.799242
59	Osgepl1	2.60247e-07	0.0357199	3.15652	4.68259	5.07399	5.18967	5.14667	3.60497	3.75902e-07	0.108214	0.547269	0.0960958	0.574487	0.123314	0.416613
60	Asnsd1	2.94608e-10	0.102448	14.3189	14.8419	18.7255	17.4846	17.9459	14.4726	4.75232e-10	0.222381	0.36475	0.316318	0.271011	0.22258	0.29217
61	Sf3b1	2.3966e-22	0.00225965	5.01085	4.44383	7.36205	9.07552	8.43857	4.84423	1.13089e-21	0.0194625	0.476288	0.619236	0.745213	0.888161	0.691557
62	Hspd1	0.0165956	0.00672456	9.20408	7.95529	7.57742	8.56082	8.19526	8.83711	0.0190245	0.0372975	-0.250529	-0.0621966	-0.093939	0.0943936	-0.0973432
63	Hspe1	2.38449e-09	0.0837229	50.3396	42.8538	41.9621	39.5816	40.4665	48.1398	3.72173e-09	0.194305	-0.257008	-0.0296398	-0.339247	-0.111879	-0.244948
64	Mob4	4.24965e-24	0.0195711	13.6011	13.9299	18.4282	21.9956	20.6695	13.6977	2.1544e-23	0.0731513	0.412075	0.379943	0.655279	0.623147	0.560071
65	Maip1	1.57752e-10	0.984507	19.1406	20.3437	23.998	25.2322	24.7734	19.4942	2.58333e-10	0.990673	0.311702	0.228	0.381228	0.297526	0.330669
66	Bzw1	1.08725e-23	0.0487685	10.1996	10.0233	16.3216	19.2287	18.148	10.1478	5.4153e-23	0.1345	0.629121	0.652011	0.852953	0.875843	0.780436
67	Clk1	1.04185e-99	0.0124846	7.49004	8.21339	22.7295	26.7073	25.2286	7.70261	4.43933e-97	0.0549554	1.48284	1.36488	1.70642	1.58846	1.59162
68	Nif3l1	0.0785505	0.218753	2.40339	3.35211	2.36707	2.63505	2.53543	2.68218	0.0855582	0.369046	-0.0154788	-0.370219	0.0949994	-0.25974	-0.0586741
69	Orc2	0.0522204	0.145563	1.77659	1.50301	1.9647	2.43213	2.25837	1.6962	0.0578026	0.281916	0.0945732	0.24422	0.305789	0.455436	0.273225
70	Fam126b	4.34287e-24	0.288468	0.227484	0.370393	1.4505	1.89076	1.7271	0.269479	2.20035e-23	0.447782	0.997371	0.838486	1.23574	1.07686	1.10313
71	Ndufb3	3.62077e-06	0.769904	54.231	50.3663	61.2106	58.1579	59.2927	53.0953	4.99048e-06	0.849446	0.171681	0.27634	0.0990909	0.203749	0.156478
72	Cflar	5.11256e-14	0.317428	8.16116	7.82392	11.9673	12.7578	12.464	8.06206	1.06448e-13	0.478106	0.501271	0.555381	0.586653	0.640763	0.571193
73	Trak2	0.0019349	0.000217269	15.7062	13.7654	13.6673	16.7987	15.6347	15.1359	0.00234255	0.00478961	-0.187779	-0.00961222	0.0913859	0.269553	0.0439212
74	Stradb	6.69531e-08	0.0149588	20.6226	22.1599	18.1708	15.4057	16.4336	21.0744	9.90237e-08	0.0614741	-0.173629	-0.272714	-0.398342	-0.497427	-0.340502
75	Fzd7	0.0720351	0.389113	3.7787	3.88679	4.13255	4.89485	4.61148	3.81046	0.0788141	0.549192	0.103057	0.0707891	0.302837	0.270569	0.222206
76	Sumo1	5.60337e-21	0.296288	9.19582	10.3424	15.0267	14.9982	15.0088	9.53276	2.49227e-20	0.456677	0.652499	0.498747	0.649931	0.496179	0.60398
77	Nop58	1.59721e-19	0.312372	0.248082	0.375707	1.62513	2.11182	1.9309	0.285586	6.5471e-19	0.473166	1.07268	0.932217	1.31804	1.17758	1.18892
78	Bmpr2	0.0140106	0.641054	11.4615	12.5708	11.7526	13.3497	12.7561	11.7875	0.016124	0.757916	0.0333136	-0.0897127	0.203543	0.0805168	0.105331
79	Wdr12	0.1024	0.728377	4.91499	5.32337	5.65775	5.83203	5.76725	5.03499	0.110518	0.821333	0.17066	0.0743432	0.207939	0.111622	0.165217
80	Raph1	9.80994e-27	0.00108508	2.00095	2.04403	3.90936	5.96985	5.20391	2.01361	5.66398e-26	0.0134405	0.710117	0.689553	1.21571	1.19515	1.04169
81	Ndufs1	7.35794e-07	0.138134	75.1298	75.8233	91.7082	85.186	87.6105	75.3336	1.04507e-06	0.271865	0.284235	0.271153	0.178991	0.165909	0.215159
82	Eef1b2	7.79766e-23	0.102872	18.603	17.2838	26.0007	27.4698	26.9237	18.2153	3.76497e-22	0.222902	0.461923	0.562431	0.538363	0.638871	0.539234
83	Klf7	5.46444e-05	0.0131975	3.565	2.99156	3.99391	5.30659	4.81863	3.39649	7.11722e-05	0.0566309	0.129553	0.323217	0.466245	0.659909	0.404327
84	Creb1	4.34649e-15	0.894267	2.81332	3.37055	5.34871	5.99795	5.75661	2.97707	1.04872e-14	0.932911	0.735417	0.538649	0.875886	0.679118	0.764595
85	Idh1	7.61346e-11	0.0196807	6.93583	6.08241	9.34897	11.3439	10.6023	6.68504	1.26475e-10	0.0734001	0.383035	0.547175	0.637341	0.801481	0.594286
86	Kansl1l	1.41804e-18	0.588266	0.207617	0.390611	1.19103	1.51022	1.39157	0.261391	5.46317e-18	0.716172	0.859445	0.655889	1.05565	0.852097	0.922942
87	Acadl	1.74617e-25	1.0978e-08	82.7909	59.9155	53.0806	57.4068	55.7987	76.0687	9.53289e-25	2.92357e-06	-0.631682	-0.171699	-0.520656	-0.0606722	-0.440289
88	Myl1	1.87478e-25	4.46708e-05	4473.56	5749.48	6056.93	6172.28	6129.4	4848.5	1.02154e-24	0.00153562	0.437078	0.075141	0.464291	0.102354	0.338145
89	Lancl1	8.10606e-07	0.835769	2.39092	3.32724	3.70645	4.79592	4.39094	2.66607	1.14961e-06	0.893878	0.472962	0.121191	0.773362	0.42159	0.556302
90	Ikzf2	0.0955324	0.219268	2.0644	2.04002	1.30894	1.84475	1.64557	2.05724	0.103368	0.369453	-0.408379	-0.396855	-0.107304	-0.0957808	-0.208649
91	Fn1	8.66921e-65	0.339027	1.1749	1.48031	14.617	16.3276	15.6917	1.26465	4.76639e-63	0.498628	2.8441	2.65452	2.99405	2.80448	2.88177
92	Mreg	5.45517e-08	0.124557	0.3392	0.569823	0	0	0	0.40697	8.10336e-08	0.253396	-0.421371	-0.650602	-0.421371	-0.650602	-0.492592
93	Pecr	3.7122e-08	0.185382	1.75447	2.70403	3.16482	3.45067	3.34441	2.03351	5.54422e-08	0.329267	0.596477	0.169159	0.692244	0.264926	0.518172
94	Xrcc5	0.0913574	0.765843	1.20386	1.42282	1.46234	1.8026	1.67611	1.2682	0.0990569	0.84716	0.159996	0.0233438	0.346731	0.210079	0.238589
95	Smarcal1	2.09297e-05	0.355128	2.70848	3.41255	3.28511	4.5975	4.10965	2.91538	2.7791e-05	0.516098	0.208504	-0.042282	0.593955	0.343169	0.384072
96	Igfbp5	4.11214e-104	9.13684e-06	64.455	75.5319	159.969	212.245	192.813	67.71	2.50312e-101	0.000477694	1.29821	1.07265	1.70394	1.47838	1.49607
97	Tns1	7.44401e-28	1.03754e-06	68.0013	68.755	74.781	97.4051	88.9951	68.2228	4.53775e-27	8.84192e-05	0.135213	0.119541	0.512108	0.496437	0.378599
98	Arpc2	3.82627e-24	0.196034	16.7842	17.3785	26.1142	29.5053	28.2447	16.9589	1.94671e-23	0.343142	0.608449	0.561024	0.778463	0.731038	0.70348
99	Aamp	4.30844e-16	0.760745	9.95777	11.9888	13.4771	15.8584	14.9732	10.5546	1.21578e-15	0.843664	0.401822	0.156509	0.62151	0.376197	0.467185
100	Pnkd	3.15297e-07	0.0570056	5.99645	5.46479	3.37438	4.25025	3.92466	5.84021	4.53419e-07	0.150683	-0.677545	-0.563527	-0.414236	-0.300217	-0.474016
101	Ctdsp1	5.24233e-14	0.000490813	7.57355	7.69991	8.23082	11.0733	10.0167	7.61069	1.08937e-13	0.00799484	0.106565	0.0854575	0.493855	0.472747	0.355489
102	Cnot9	7.46675e-08	0.181549	1.44402	1.35355	2.49616	3.11269	2.88351	1.41743	1.10242e-07	0.325681	0.516519	0.570934	0.75083	0.805245	0.683887
103	Plcd4	1.41165e-05	0.5811	2.93917	3.18668	4.36324	5.03384	4.78456	3.0119	1.88929e-05	0.711854	0.445213	0.357299	0.615185	0.527272	0.527921
104	Bcs1l	2.088e-05	0.154994	2.43394	2.06272	1.03043	1.35011	1.23128	2.32485	2.77293e-05	0.293068	-0.758076	-0.593027	-0.547133	-0.382084	-0.575419
105	Cyp27a1	0.000155102	0.728467	7.67128	9.17263	7.92348	9.71996	9.05216	8.11247	0.000198286	0.821333	0.0413611	-0.189014	0.305981	0.0756058	0.141591
106	Prkag3	2.69949e-98	0.149961	5.76762	8.95027	20.1097	25.1083	23.2502	6.70287	8.84811e-96	0.287111	1.64119	1.0851	1.94779	1.3917	1.65453
107	Retreg2	1.18581e-10	0.204838	0.424534	0.694223	1.47276	2.35602	2.02769	0.503785	1.95236e-10	0.353081	0.795629	0.545496	1.23626	0.986128	1.00962
108	Atg9a	5.15579e-28	0.906006	0.313592	0.697536	2.11532	2.45987	2.33179	0.426418	3.17239e-27	0.940207	1.24586	0.87594	1.3972	1.02727	1.2239
109	Stk16	0.000120702	0.793929	0.21311	0.464273	0.578258	0.773264	0.700775	0.286916	0.00015517	0.865422	0.379623	0.108148	0.547698	0.276223	0.402274
110	Tuba4a	8.1644e-14	0.539657	467.759	467.686	356.618	372.516	366.606	467.737	1.66612e-13	0.679013	-0.390428	-0.390205	-0.327677	-0.327454	-0.35062
111	Dnajb2	0.331744	0.594917	1.95771	2.05748	1.33494	1.73089	1.58371	1.98703	0.343473	0.721097	-0.341092	-0.388958	-0.115106	-0.162972	-0.209268
112	Dnpep	5.80509e-06	0.84136	4.82397	5.00886	6.23682	6.5486	6.4327	4.8783	7.90903e-06	0.897805	0.313354	0.268266	0.374206	0.329118	0.338488
113	Des	0.000146464	0.123243	269.807	289.427	260.696	305.302	288.721	275.573	0.000187497	0.251624	-0.0493757	-0.150283	0.17769	0.0767828	0.0670051
114	Speg	3.74254e-06	0.00227117	169.192	161.964	114.756	153.841	139.312	167.068	5.15416e-06	0.019494	-0.556071	-0.49346	-0.136378	-0.0737674	-0.260406
115	Gmppa	8.3912e-11	0.244278	3.88782	5.36956	5.96315	6.64669	6.3926	4.32324	1.39043e-10	0.397277	0.51055	0.128546	0.645645	0.263641	0.473776
116	Farsb	2.42146e-06	0.252808	40.5301	40.2284	50.1125	46.3665	47.759	40.4414	3.36306e-06	0.407814	0.29952	0.310037	0.18971	0.200227	0.234594
117	Acsl3	0.00913756	0.269378	0.203154	0.381347	0.603751	0.549229	0.569496	0.255518	0.0106424	0.426698	0.414628	0.215375	0.364729	0.165475	0.322019
118	Mrpl44	0.915308	0.504647	1.49175	1.7019	1.62949	1.52969	1.56679	1.5535	0.916598	0.648951	0.0776255	-0.0391932	0.0218032	-0.0950155	0.00748643
119	Serpine2	7.48584e-48	0.781694	16.7245	19.0404	29.0894	30.9569	30.2627	17.4051	1.45983e-46	0.856466	0.763506	0.586344	0.850379	0.673216	0.764338
120	Cul3	0.0358934	0.694045	144.843	156.722	139.151	148.026	144.727	148.334	0.0402319	0.797016	-0.057432	-0.170397	0.031144	-0.0818215	-0.035274
121	Irs1	0.0736459	0.635853	14.839	16.8416	15.6943	16.9677	16.4943	15.4275	0.0804732	0.753545	0.0758759	-0.0958932	0.18193	0.0101607	0.0907792
122	Mff	5.20919e-05	0.449287	14.845	15.9039	17.8323	17.9396	17.8997	15.1562	6.79931e-05	0.602671	0.24918	0.155854	0.257378	0.164052	0.226279
123	Agfg1	1.22103e-10	0.0320229	1.37268	0.927673	2.39313	2.94257	2.73833	1.24191	2.00881e-10	0.100924	0.516096	0.815754	0.732617	1.03228	0.737662
124	Trip12	2.69131e-07	0.00511399	36.3988	36.4837	37.1935	45.5563	42.4476	36.4237	3.88537e-07	0.0317012	0.030338	0.0270653	0.315985	0.312712	0.215324
125	Sp100	9.69025e-15	0.000168073	6.78375	5.69012	8.64742	12.6456	11.1594	6.46238	2.2199e-14	0.00396764	0.309678	0.528111	0.809896	1.02833	0.704359
126	Cab39	0.00121933	0.33881	33.0178	33.3093	25.8944	29.0404	27.871	33.1035	0.00149212	0.498419	-0.338984	-0.351294	-0.179387	-0.191697	-0.240301
127	Psmd1	0.00488861	0.363483	24.7661	28.6093	23.4493	30.2008	27.6911	25.8954	0.00578862	0.524049	-0.0756774	-0.276255	0.276109	0.0755315	0.0932405
128	Ncl	7.31032e-05	0.0749031	14.3721	15.441	14.7105	18.9192	17.3547	14.6862	9.47939e-05	0.179441	0.0314186	-0.0655635	0.37385	0.276868	0.226658
129	Ptma	5.19297e-35	0.00292032	0.431614	0.557575	4.71275	7.76709	6.63171	0.468629	4.75343e-34	0.0225221	1.99654	1.87488	2.61446	2.4928	2.37754
130	Pde6d	0.00853056	0.255063	7.25521	8.71267	8.15075	8.68155	8.48424	7.6835	0.00994765	0.410199	0.148584	-0.0859784	0.229933	-0.00462933	0.127255
131	Eif4e2	5.18911e-18	0.000436563	6.51936	6.14185	8.27298	11.1169	10.0597	6.40842	1.89792e-17	0.00735255	0.302423	0.376735	0.688338	0.76265	0.578077
132	Atg16l1	1.12984e-07	0.580706	2.97196	3.28331	4.99145	4.93299	4.95472	3.06346	1.65495e-07	0.71174	0.593053	0.484181	0.578907	0.470035	0.551327
133	Dgkd	7.58623e-08	0.275514	4.06314	4.81583	5.07794	6.62688	6.0511	4.28432	1.11948e-07	0.433117	0.263551	0.0635968	0.591062	0.391108	0.416129
134	Hjurp	1.54037e-67	0.000487653	0.377819	0.361436	7.82357	11.2124	9.95271	0.373005	1.04183e-65	0.00796127	2.67898	2.69623	3.14789	3.16515	2.99588
135	Agap1	1.98439e-41	0.00133241	0.627403	0.71545	2.7757	4.282	3.72207	0.653276	2.69284e-40	0.01498	1.21417	1.13816	1.69851	1.6225	1.51409
136	Cops8	0.00100343	0.932643	13.8817	15.2536	15.0359	16.5023	15.9572	14.2848	0.0012343	0.957283	0.107762	-0.0194571	0.234007	0.106788	0.149796
137	Col6a3	2.64459e-77	0.00014336	1.52495	1.96122	11.6536	16.7617	14.8629	1.65315	3.41473e-75	0.00353096	2.32522	2.09528	2.81444	2.5845	2.57987
138	Lrrfip1	1.28702e-83	2.34939e-05	11.7024	12.045	25.1378	32.0508	29.481	11.803	2.55069e-81	0.00100108	1.04104	1.00264	1.37959	1.34119	1.25143
139	Ramp1	1.36781e-26	0.535968	1.72335	2.22792	5.43346	5.53734	5.49873	1.87162	7.82837e-26	0.675767	1.24021	0.994992	1.26332	1.0181	1.17829
140	Ube2f	0.0867297	0.816628	9.09512	9.54268	10.1426	10.3762	10.2893	9.22664	0.0941767	0.881148	0.142426	0.0798424	0.172355	0.109771	0.142628
141	Klhl30	8.35372e-10	0.286193	10.3113	11.8523	12.2207	15.0288	13.985	10.7642	1.32472e-09	0.445386	0.225024	0.0407669	0.502899	0.318642	0.349115
142	Ilkap	0.00154095	0.258593	4.39067	4.5786	4.94017	5.90473	5.54618	4.4459	0.00187465	0.414312	0.14004	0.0906001	0.357121	0.30768	0.265483
143	Asb1	0.384187	0.419149	1.99083	2.53533	2.13238	2.29232	2.23287	2.15084	0.395607	0.575756	0.0667134	-0.174582	0.138556	-0.10274	0.0370783
144	Hdac4	2.40922e-11	0.00114911	9.47092	8.75261	10.9149	14.3452	13.0701	9.25984	4.10298e-11	0.0139498	0.186377	0.288905	0.551399	0.653928	0.455621
145	Ndufa10	0.000262702	0.0148025	26.0999	22.7487	19.9807	22.0976	21.3107	25.1151	0.000332602	0.0611461	-0.369224	-0.178787	-0.230545	-0.0401078	-0.227151
146	Cops9	1.06746e-24	0.0371315	14.7011	14.3945	24.0555	20.7702	21.9914	14.611	5.59807e-24	0.111186	0.674264	0.702708	0.471494	0.499939	0.558536
147	Gpc1	1.1492e-76	1.30774e-07	16.659	18.3821	29.7918	42.0968	37.5227	17.1654	1.32344e-74	1.92147e-05	0.802141	0.667824	1.28717	1.15286	1.08452
148	Dusp28	0.0194278	0.31483	9.14153	9.87259	10.9584	10.6652	10.7742	9.35636	0.0221684	0.475285	0.237752	0.137332	0.201932	0.101512	0.18511
149	Rnpepl1	0.15132	0.0270003	2.39406	2.0025	1.83005	2.57569	2.29851	2.27899	0.160932	0.0898463	-0.262181	-0.0853365	0.0752098	0.252054	0.00856271
150	Ppp1r7	0.000964997	0.824414	4.15371	4.81195	5.1405	5.65431	5.46331	4.34714	0.0011884	0.886742	0.252746	0.0793345	0.368679	0.195268	0.273508
151	Hdlbp	1.68295e-07	0.449231	23.9608	26.2246	27.6524	28.8058	28.3771	24.626	2.4508e-07	0.602671	0.198994	0.0737454	0.255933	0.130684	0.197082
152	Septin2	4.2778e-32	0.47131	5.52102	5.90075	9.74368	10.6664	10.3234	5.63261	3.28132e-31	0.621873	0.720318	0.638663	0.839192	0.757537	0.77166
153	Stk25	0.573121	0.63611	3.12296	3.37199	2.87644	2.86251	2.86768	3.19614	0.581584	0.753745	-0.0889496	-0.173558	-0.0941445	-0.178753	-0.117593
154	Thap4	0.176726	0.834913	1.65621	1.70433	1.11331	1.25659	1.20333	1.67035	0.186879	0.893524	-0.32986	-0.355766	-0.235223	-0.261129	-0.277343
155	Fam174a	4.65123e-06	0.0116566	6.21392	7.53684	5.40829	4.96229	5.12808	6.60267	6.36649e-06	0.0527548	-0.170845	-0.413763	-0.274917	-0.517835	-0.311072
156	Pam	5.10791e-69	0.806295	1.14881	1.1959	7.39001	7.58831	7.5146	1.16265	3.83894e-67	0.873474	1.96513	1.93386	1.99884	1.96756	1.97714
157	Zcchc2	1.27847e-21	0.931082	0.307121	0.531143	1.92425	2.11914	2.04669	0.372952	5.86075e-21	0.956216	1.16168	0.93346	1.25475	1.02654	1.14996
158	Vps4b	5.99198e-06	0.29892	1.7513	1.92279	2.51954	3.21359	2.95559	1.80169	8.15583e-06	0.459532	0.355276	0.268042	0.614937	0.527703	0.497595
159	Tsn	9.80728e-11	0.839273	7.64039	9.14965	10.1611	11.8789	11.2403	8.0839	1.62161e-10	0.896501	0.369311	0.137049	0.575839	0.343577	0.430259
160	Nifk	1.51106e-19	0.760549	0.39922	0.95387	2.04819	2.48535	2.32285	0.56221	6.2149e-19	0.843664	1.12333	0.641619	1.31668	0.834968	1.08883
161	Clasp1	8.80915e-10	0.409526	1.73503	1.72457	3.57508	4.13043	3.92399	1.73195	1.39642e-09	0.567108	0.742241	0.747766	0.907526	0.913051	0.849895
162	Ptpn4	0.0594034	0.0191155	1.30048	2.03823	1.65791	1.45214	1.52863	1.51728	0.065422	0.0718898	0.208353	-0.19294	0.0921044	-0.309188	0.00649157
163	Tmem37	0.00223664	0.0493968	14.1773	19.1178	12.3771	12.1064	12.207	15.6291	0.00269904	0.135464	-0.182151	-0.588703	-0.211652	-0.618203	-0.332409
164	Dbi	3.03335e-28	0.311502	37.1576	37.9053	55.9678	53.7195	54.5553	37.3773	1.8855e-27	0.472101	0.578178	0.55018	0.520085	0.492088	0.53367
165	Steap3	3.09768e-07	0.664682	0.332023	0.696632	0.909579	1.41403	1.22651	0.439167	4.45769e-07	0.776025	0.519636	0.170581	0.857826	0.508771	0.629552
166	Insig2	0.378074	0.389469	6.43882	6.6547	7.3411	6.88549	7.05485	6.50226	0.389453	0.549603	0.165165	0.123892	0.0841272	0.0428541	0.102534
167	Ddx18	1.84416e-06	0.207382	4.41255	4.34915	5.71578	6.61552	6.28106	4.39392	2.57386e-06	0.355853	0.311248	0.328246	0.492635	0.509633	0.432816
168	Actr3	1.27863e-18	0.146561	3.7399	4.80454	6.49224	8.92717	8.02204	4.05276	4.94621e-18	0.282834	0.66054	0.368216	1.06652	0.774201	0.836383
169	Slc35f5	0.0657366	0.0361307	2.33216	3.07677	2.41207	1.95262	2.12341	2.55097	0.072108	0.108993	0.0341898	-0.256779	-0.174461	-0.46543	-0.185091
170	Ccnt2	1.95581e-71	0.0227586	1.44277	1.31617	7.51495	8.91299	8.3933	1.40557	1.71829e-69	0.0805271	1.80148	1.87825	2.0208	2.09758	1.96526
171	R3hdm1	0.204278	0.149613	4.96487	4.39968	3.96057	4.43922	4.26129	4.79879	0.215138	0.286582	-0.265985	-0.122369	-0.13309	0.0105258	-0.140333
172	Ubxn4	0.00593204	0.387503	24.8996	27.1291	21.0658	25.1718	23.6455	25.5548	0.0069892	0.548191	-0.231117	-0.350251	0.0150846	-0.10405	-0.107646
173	Dars	0.400065	0.734756	2.96483	3.07804	3.26228	3.59736	3.4728	2.9981	0.41141	0.82574	0.104364	0.0637492	0.213546	0.172931	0.161864
174	Mapkapk2	7.17694e-06	0.000529265	16.7961	16.8457	15.0189	19.6116	17.9044	16.8107	9.73295e-06	0.00843064	-0.151786	-0.155796	0.211897	0.207887	0.0859801
175	Eif2d	2.24132e-18	0.943023	0.278329	0.469499	1.34701	1.55632	1.47852	0.334506	8.47406e-18	0.962921	0.876568	0.675503	0.999812	0.798747	0.893172
176	Slc41a1	0.00199679	0.749314	1.7804	1.5946	0.952679	0.909076	0.925284	1.7258	0.00241645	0.835491	-0.509837	-0.410059	-0.542418	-0.442639	-0.501609
177	Nucks1	7.7154e-27	0.000316661	9.97037	10.972	13.0499	18.8734	16.7086	10.2647	4.47283e-26	0.0060503	0.356946	0.230893	0.857225	0.731172	0.652642
178	Elk4	0.0180345	0.559831	5.23876	5.84457	3.80056	4.89015	4.48512	5.41678	0.0206268	0.695261	-0.378057	-0.511758	-0.082956	-0.216657	-0.226328
179	Tmcc2	0.016136	0.596097	1.68365	1.80478	0.847164	1.21	1.07512	1.71925	0.0185125	0.721787	-0.538886	-0.602578	-0.280151	-0.343843	-0.39001
180	Rbbp5	6.60457e-10	0.0359277	11.5095	10.8625	6.41207	8.30708	7.60265	11.3194	1.05165e-09	0.108573	-0.755079	-0.678464	-0.426627	-0.350012	-0.518079
181	Snrpe	8.78749e-16	0.774459	3.92147	3.76975	6.84432	6.50399	6.6305	3.87688	2.34903e-15	0.852265	0.67256	0.717735	0.60857	0.653745	0.645819
182	Zc3h11a	1.21554e-19	0.194077	7.17839	7.82979	9.79573	11.45	10.8351	7.36981	5.02855e-19	0.340453	0.400572	0.29001	0.606259	0.495697	0.499802
183	Prelp	1.19217e-52	0.0209242	4.31282	7.33834	18.7328	18.1502	18.3668	5.2019	3.04182e-51	0.0764049	1.89304	1.24276	1.84981	1.19953	1.6428
184	Fmod	1.82749e-11	2.75538e-11	1.13929	5.38867	3.45147	1.72936	2.36951	2.38801	3.138e-11	1.53488e-08	1.05715	-0.521233	0.35143	-1.22695	-0.00789722
185	Cyb5r1	3.8682e-11	0.00142025	12.3938	12.9285	12.7742	17.0771	15.4776	12.5509	6.50963e-11	0.015413	0.0404006	-0.0160662	0.432591	0.376124	0.282111
186	Adipor1	7.29323e-09	0.00364173	59.9037	60.1232	61.2463	69.3736	66.3525	59.9682	1.11726e-08	0.0255099	0.0314582	0.0262692	0.208503	0.203314	0.143673
187	Klhl12	1.35672e-09	0.833752	4.42279	4.60437	2.48077	2.53365	2.51399	4.47615	2.13715e-09	0.893025	-0.639627	-0.687145	-0.617875	-0.665394	-0.64005
188	Ppp1r12b	2.04347e-13	0.391939	7.36757	7.56746	3.52557	4.47525	4.12223	7.42631	4.01626e-13	0.551715	-0.886711	-0.920769	-0.611884	-0.645942	-0.71813
189	Arl8a	0.00465285	0.0352342	1.6429	1.40321	1.68531	2.67459	2.30685	1.57247	0.00551636	0.107391	0.0229628	0.160127	0.47546	0.612624	0.362304
190	Timm17a	4.54654e-06	0.272351	16.2313	17.4854	20.4738	20.0887	20.2318	16.5998	6.2272e-06	0.429967	0.317547	0.216197	0.291435	0.190085	0.270668
191	Shisa4	9.58372e-16	0.942118	11.5182	13.775	14.6448	16.9792	16.1114	12.1814	2.54828e-15	0.962467	0.321656	0.0825288	0.5223	0.283172	0.376459
192	Ipo9	3.49457e-22	0.0310949	0.358233	0.403034	1.71296	2.6055	2.27372	0.371399	1.63714e-21	0.0990248	0.998135	0.951317	1.40847	1.36165	1.25528
193	Phlda3	1.62408e-06	0.794224	29.7402	33.068	21.7582	25.8168	24.3081	30.7181	2.27153e-06	0.865521	-0.433741	-0.582031	-0.196988	-0.345278	-0.325706
194	Cacna1s	6.35208e-28	1.91991e-06	14.4665	14.2656	17.0202	23.2006	20.9032	14.4075	3.88883e-27	0.000142274	0.220467	0.239333	0.64589	0.664757	0.507507
195	Nek7	0.00235362	0.958665	38.2037	41.2014	41.5283	44.3805	43.3202	39.0846	0.00283699	0.97398	0.117431	0.0111304	0.211081	0.104781	0.144916
196	2310009B15Rik	0.0162293	0.870513	0.450169	0.712713	0.670583	0.979537	0.86469	0.52732	0.018612	0.916318	0.204131	-0.0359317	0.448942	0.208879	0.287934
197	Dennd1b	0.144167	0.21492	2.38567	2.56404	1.72994	2.58672	2.26823	2.43808	0.153593	0.364922	-0.310569	-0.384644	0.0832264	0.00915118	-0.0730936
198	Zbtb41	6.18478e-18	0.129592	0.349615	0.291314	1.29618	1.64343	1.51435	0.332482	2.24093e-17	0.260106	0.766689	0.830398	0.969863	1.03357	0.916067
199	Cdc73	1.56864e-08	0.75568	12.111	13.339	15.4182	17.0825	16.4638	12.4719	2.37652e-08	0.840406	0.324513	0.195345	0.46381	0.334642	0.374415
200	Glrx2	0.162178	0.441755	3.55419	3.87217	3.4376	4.18285	3.90582	3.64763	0.172008	0.596804	-0.0374168	-0.134786	0.18655	0.0891805	0.0779972
201	Uchl5	0.000518371	0.595535	0.319651	0.417692	0.652437	0.876427	0.793164	0.348462	0.000646031	0.721369	0.324438	0.221051	0.507832	0.404445	0.411193
202	Odr4	3.85419e-08	0.457413	2.52812	2.27847	0.942655	1.06024	1.01653	2.45476	5.75125e-08	0.609741	-0.86087	-0.754992	-0.776084	-0.670206	-0.776707
203	Tpr	0.844033	0.976245	4.41954	4.59298	4.60554	4.75951	4.70228	4.4705	0.847713	0.985146	0.0486841	0.00323621	0.0877779	0.04233	0.0598646
204	Ivns1abp	0.0529832	0.498742	7.92791	7.82647	6.45619	6.96226	6.77414	7.8981	0.0585861	0.643982	-0.259883	-0.243398	-0.165143	-0.148659	-0.194814
205	Trmt1l	2.33806e-31	0.0934284	0.300601	0.407511	2.11258	2.83993	2.56955	0.332017	1.72212e-30	0.208975	1.25893	1.14496	1.5619	1.44793	1.42213
206	1700025G04Rik	8.10183e-26	0.381039	10.2087	12.8039	16.9118	18.3756	17.8315	10.9713	4.48336e-25	0.541745	0.676291	0.37584	0.789622	0.489171	0.653564
207	Arpc5	3.09908e-55	0.00715391	5.70444	5.73463	21.7303	27.9877	25.6617	5.71331	9.13854e-54	0.0387758	1.76143	1.75495	2.11225	2.10577	1.98967
208	Smg7	1.73089e-08	0.000215145	13.2269	13.4123	12.2535	16.9385	15.197	13.2814	2.61629e-08	0.00478219	-0.102245	-0.120932	0.334445	0.315758	0.181591
209	Lamc1	3.96043e-14	0.0881423	5.32905	5.97398	7.19101	9.25998	8.49089	5.51857	8.36036e-14	0.20138	0.372053	0.232058	0.696968	0.556974	0.541988
210	Glul	6.8604e-05	0.120716	43.4092	42.5229	50.0277	58.523	55.3651	43.1488	8.90818e-05	0.248315	0.200419	0.229504	0.422587	0.451672	0.352427
211	Xpr1	0.000615649	0.0992242	9.986	11.1322	8.40231	11.2362	10.1828	10.3228	0.000765251	0.216944	-0.224579	-0.367749	0.155487	0.0123176	-0.0179564
212	Acbd6	1.01155e-08	1.8128e-05	8.07456	7.36361	7.46015	11.0075	9.68884	7.86564	1.54211e-08	0.00084419	-0.101145	0.0165565	0.404034	0.521736	0.269808
213	Cep350	4.06968e-20	0.264665	0.355844	0.488295	1.68746	2.20445	2.01227	0.394766	1.72375e-19	0.421033	0.987053	0.852583	1.24088	1.10641	1.11083
214	Tor1aip1	0.0112753	0.836266	11.2076	12.6796	9.54147	11.2518	10.616	11.6401	0.0130483	0.894183	-0.211697	-0.375953	0.00522436	-0.159032	-0.121893
215	Tor1aip2	3.88975e-10	0.392138	8.69734	10.1106	11.7798	12.3629	12.1462	9.11264	6.24853e-10	0.551816	0.398207	0.201932	0.462577	0.266302	0.378485
216	Csnk2a3	9.81775e-27	0.658198	1.80387	1.73435	4.56998	4.72667	4.66843	1.78344	5.66465e-26	0.771185	0.990253	1.02648	1.03028	1.0665	1.02608
217	Abl2	5.09419e-05	0.620373	0.446357	0.657424	1.04941	1.44555	1.29829	0.508381	6.65124e-05	0.742217	0.502787	0.306267	0.757733	0.561214	0.607561
218	Fam20b	8.7011e-08	0.679559	7.76755	8.89546	5.28402	6.05084	5.76579	8.099	1.28001e-07	0.787062	-0.480486	-0.655078	-0.31438	-0.488972	-0.427449
219	Cop1	5.56052e-12	0.373438	8.29594	10.106	11.3795	12.3415	11.9839	8.82783	9.82719e-12	0.533876	0.413279	0.156617	0.521254	0.264592	0.401781
220	Mrps14	1.88045e-06	0.305141	11.1206	10.8249	14.2772	12.9615	13.4506	11.0337	2.62321e-06	0.466108	0.333917	0.369549	0.203999	0.23963	0.264049
221	Cacybp	2.30489e-08	0.35132	13.4797	13.9964	17.3044	16.7656	16.9659	13.6315	3.4673e-08	0.512136	0.338161	0.287578	0.295056	0.244473	0.296181
222	Rc3h1	0.444394	0.853576	1.74282	1.97456	1.87853	2.20065	2.08091	1.81092	0.455347	0.905536	0.0696712	-0.0473457	0.222708	0.105691	0.132315
223	Gas5	8.31449e-07	0.658956	8.33976	10.2735	10.3915	11.8465	11.3056	8.90802	1.17819e-06	0.77178	0.286503	0.0150206	0.459915	0.188432	0.31265
224	Prdx6	1.67474e-06	0.40872	18.9365	19.5273	21.6491	23.4792	22.7989	19.1101	2.34199e-06	0.56636	0.184038	0.141906	0.296144	0.254012	0.242972
225	Pigc	2.40849e-19	0.146407	2.58119	2.95988	4.99751	6.40678	5.88292	2.69247	9.76459e-19	0.282729	0.743927	0.598907	1.04841	0.90339	0.898435
226	Eef1aknmt	8.49166e-05	0.417999	1.04671	1.19386	1.67897	2.18246	1.9953	1.08995	0.000109812	0.574768	0.388375	0.288209	0.636836	0.536671	0.519232
227	Vamp4	0.00146123	0.512512	0.860784	1.14877	1.49894	1.56609	1.54113	0.945412	0.0017797	0.655789	0.425408	0.217807	0.463659	0.256057	0.385393
228	Myoc	2.38906e-29	5.716e-05	5.8222	8.67161	16.315	13.4925	14.5417	6.65953	1.57855e-28	0.00177493	1.34371	0.840194	1.087	0.583482	1.02082
229	Fmo1	4.6073e-12	0.259409	0.294122	0.410032	0.867782	1.2362	1.09925	0.328183	8.1886e-12	0.415151	0.529352	0.405598	0.789076	0.665322	0.660419
230	Prrx1	1.40982e-16	0.0961948	4.32289	4.76563	6.25538	7.86382	7.26592	4.453	4.31399e-16	0.212892	0.446841	0.331573	0.735718	0.62045	0.600126
231	Mettl11b	0.000119093	0.181789	9.08625	10.2548	12.1687	11.7304	11.8933	9.42965	0.000153125	0.325943	0.384727	0.22657	0.335887	0.17773	0.305934
232	Kifap3	4.18499e-22	0.956415	5.55849	5.95541	9.60562	9.95759	9.82675	5.67513	1.95315e-21	0.972505	0.693393	0.608622	0.740494	0.655723	0.697733
233	Nme7	2.53868e-07	0.00142813	6.81514	3.3154	4.19896	4.05405	4.10792	5.7867	3.66937e-07	0.0154448	-0.588048	0.268729	-0.62883	0.227947	-0.409976
234	Atp1b1	1.45966e-15	4.77632e-10	72.0934	49.6601	71.7365	77.5921	75.4154	65.5012	3.7636e-15	1.69599e-07	-0.00706137	0.521829	0.104644	0.633534	0.200484
235	Dpt	3.96573e-59	0.58442	6.34137	5.6924	20.78	21.0051	20.9214	6.15066	1.52234e-57	0.713847	1.56889	1.70241	1.58371	1.71724	1.61619
236	Sft2d2	6.22297e-42	4.50725e-05	2.64037	2.89272	5.95684	9.53887	8.20733	2.71452	8.72239e-41	0.0015426	0.934347	0.837655	1.53356	1.43687	1.30961
237	Tiprl	0.0374088	0.848811	5.40252	6.42687	4.32228	5.17627	4.85882	5.70354	0.0418644	0.902086	-0.266594	-0.480709	-0.0519048	-0.266019	-0.194313
238	Dcaf6	0.00353356	0.111596	12.2951	13.3724	9.14925	12.7283	11.3979	12.6117	0.00421632	0.235576	-0.38952	-0.501926	0.0462582	-0.0661481	-0.134752
239	Mpc2	1.34899e-25	0.00767236	49.9663	53.7053	39.8794	37.1781	38.1822	51.0651	7.38825e-25	0.0406869	-0.318172	-0.420309	-0.4168	-0.518938	-0.410117
240	Rcsd1	8.35873e-23	0.0870625	14.2903	16.5464	18.4953	23.1936	21.4471	14.9533	4.0313e-22	0.199502	0.350512	0.151955	0.662008	0.463452	0.492678
241	Creg1	1.96523e-41	0.537323	2.2108	3.00929	6.15515	7.33612	6.89712	2.44544	2.67108e-40	0.676876	1.15605	0.835634	1.37645	1.05603	1.19664
242	Dusp27	0.00107013	0.375824	8.31297	9.37154	8.35661	10.182	9.50345	8.62404	0.00131407	0.536522	0.0067449	-0.148572	0.263864	0.108547	0.126148
243	Pogk	0.00163966	0.211462	0.430505	0.573762	0.551022	1.03948	0.857906	0.472603	0.00199134	0.360776	0.116695	-0.0209987	0.511676	0.373983	0.335309
244	Uck2	8.34011e-51	0.312877	1.15786	1.73613	6.34851	6.32058	6.33096	1.32779	1.91575e-49	0.473432	1.76785	1.42532	1.76236	1.41982	1.65504
245	Tmco1	8.14468e-05	0.638283	0.26715	0.455243	0.587787	0.883994	0.773886	0.322423	0.000105389	0.755548	0.32543	0.125757	0.572208	0.372535	0.42373
246	Mgst3	0.000179226	0.361549	83.1368	77.9964	80.9685	71.7318	75.1653	81.6262	0.000228647	0.522223	-0.0376671	0.0532828	-0.21015	-0.119201	-0.117465
247	Rxrg	8.21946e-11	0.251007	9.96387	11.7131	7.04656	7.69621	7.45472	10.4779	1.36303e-10	0.405437	-0.446313	-0.659869	-0.334299	-0.547854	-0.441029
248	Pbx1	0.000214327	0.00331825	12.4407	10.9779	12.471	15.1722	14.1681	12.0108	0.000272408	0.0244198	0.00325582	0.169482	0.266914	0.43314	0.22133
249	Rgs5	0.00557114	0.633425	36.5137	40.2389	33.7862	36.4496	35.4595	37.6084	0.00657215	0.751641	-0.1089	-0.24549	-0.00246556	-0.139055	-0.0826164
250	Ddr2	9.41783e-70	0.487449	0.309548	0.587956	4.87169	5.47661	5.25175	0.391361	7.64369e-68	0.635272	2.16471	1.88661	2.30617	2.02807	2.16776
251	Uap1	8.07323e-10	0.0255891	3.69693	4.7378	2.51908	2.36539	2.42252	4.0028	1.28119e-09	0.086792	-0.41652	-0.705299	-0.480946	-0.769725	-0.547677
252	Uhmk1	1.24187e-14	0.982332	2.64903	3.74618	4.76169	5.87366	5.46031	2.97143	2.79905e-14	0.989205	0.65898	0.279727	0.913566	0.534313	0.701943
253	Atf6	0.000490896	0.158149	2.61853	2.76028	1.01783	2.01543	1.64459	2.66019	0.000612865	0.297151	-0.842601	-0.898038	-0.263041	-0.318478	-0.468871
254	Sdhc	0.0121878	0.0408581	21.9494	20.5149	18.8076	20.3235	19.76	21.5279	0.0140776	0.119285	-0.212399	-0.119277	-0.106015	-0.0128923	-0.117904
255	Mpz	3.35528e-16	1.26894e-10	7.26309	1.58244	4.02133	4.59014	4.3787	5.59378	9.64807e-16	5.40696e-08	-0.718613	0.959333	-0.563798	1.11415	-0.293849
256	Pcp4l1	1.689e-06	0.0639057	2.83878	2.10121	1.35959	1.52568	1.46394	2.62204	2.36116e-06	0.161892	-0.70211	-0.394296	-0.603972	-0.296158	-0.555832
257	Tomm40l	5.00434e-10	0.466657	1.50469	1.55451	2.90529	3.32624	3.16976	1.51933	7.99831e-10	0.617658	0.640797	0.612383	0.788481	0.760066	0.726924
258	Ndufs2	0.00350178	0.439192	59.8986	58.3525	54.0677	54.7677	54.5075	59.4443	0.00417899	0.594472	-0.145204	-0.108104	-0.126979	-0.0898796	-0.122923
259	Usp21	5.58543e-18	0.212662	0.433052	0.733779	1.7388	2.53993	2.24213	0.521423	2.03415e-17	0.362172	0.934453	0.659624	1.30463	1.0298	1.09152
260	Ufc1	0.0639647	0.628523	1.49153	2.01439	1.80746	2.1228	2.00558	1.64518	0.0702638	0.748188	0.172236	-0.102603	0.325812	0.0509725	0.18428
261	Dedd	5.91647e-11	0.616269	0.459909	0.970284	1.54613	1.87953	1.7556	0.609888	9.87275e-11	0.738656	0.802429	0.369904	0.979953	0.547428	0.775404
262	Nit1	0.223096	0.311909	0.368055	0.631989	0.533363	0.577371	0.561012	0.445615	0.234169	0.472634	0.164573	-0.0899325	0.205396	-0.0491094	0.110798
263	Pfdn2	1.02326e-05	0.0619469	25.3893	26.2749	26.4782	31.1009	29.3825	25.6496	1.37782e-05	0.159105	0.0583342	0.0107172	0.282656	0.235039	0.189129
264	F11r	0.955914	0.587349	3.57228	3.32764	3.43333	3.59013	3.53184	3.50039	0.956475	0.715363	-0.044524	0.0348113	0.00562023	0.0849555	0.0100474
265	Ncstn	1.30423e-24	0.00026565	3.82002	3.77917	5.72167	8.43051	7.42356	3.80802	6.81464e-24	0.00543244	0.479779	0.492059	0.968296	0.980576	0.808988
266	Copa	9.12072e-42	0.357942	18.3006	21.2043	27.2909	31.6141	30.0071	19.1539	1.26385e-40	0.518685	0.551691	0.349499	0.75685	0.554659	0.621539
267	Pex19	1.61479e-14	0.652937	15.8035	15.7183	20.4836	20.9605	20.7832	15.7784	3.58273e-14	0.766754	0.354474	0.361804	0.38615	0.393481	0.376607
268	Dcaf8	0.000396011	0.294473	8.1909	8.88361	8.70876	10.3055	9.71197	8.39446	0.000496953	0.454702	0.0790815	-0.0257509	0.298751	0.193919	0.189342
269	Pea15a	5.72556e-47	0.00156645	11.6242	11.2182	25.3453	32.5246	29.8558	11.5049	1.06072e-45	0.0162598	1.06135	1.10851	1.40903	1.45619	1.30305
270	Casq1	5.79605e-173	2.76017e-18	631.353	850.682	1362.28	1321.72	1336.8	695.805	4.93939e-169	4.70443e-15	1.10828	0.678696	1.0647	0.635119	0.941031
271	Igsf8	1.89234e-17	0.00165666	3.97906	3.38293	6.08705	8.35059	7.50917	3.80388	6.50787e-17	0.0166519	0.50931	0.69329	0.909184	1.09316	0.824818
272	Atp1a2	2.23313e-05	0.000205619	160.56	155.565	145.629	182.409	168.737	159.092	2.96106e-05	0.00462344	-0.139898	-0.0945941	0.182996	0.2283	0.0843973
273	Tagln2	2.00175e-46	0.0654345	1.83453	1.98569	12.1257	15.1593	14.0317	1.87895	3.56136e-45	0.164445	2.21122	2.13626	2.51119	2.43623	2.38439
274	Dusp23	2.20337e-07	0.100056	3.84246	3.30266	1.97512	2.34585	2.20804	3.68383	3.19285e-07	0.218355	-0.70279	-0.532279	-0.533369	-0.362858	-0.545999
275	Fh1	0.106226	0.767265	25.932	24.2135	28.02	25.7378	26.5862	25.427	0.114532	0.847961	0.10773	0.202855	-0.0104391	0.0846867	0.0619342
276	Cep170	4.99069e-12	0.0380409	3.07835	3.26715	4.43499	6.12251	5.49521	3.13383	8.85502e-12	0.113193	0.414292	0.349003	0.804402	0.739114	0.651898
277	Zbtb18	2.55872e-10	0.0141719	10.6749	9.84805	6.9327	8.22591	7.74519	10.4319	4.1408e-10	0.0594357	-0.557524	-0.451552	-0.339644	-0.233673	-0.386505
278	Adss	1.27903e-53	0.0301583	0.255487	0.245644	3.912	5.00839	4.60083	0.252594	3.46028e-52	0.0972047	1.96806	1.97942	2.25873	2.27009	2.16072
279	Desi2	0.0740281	0.0231747	7.02368	6.60185	6.25053	7.67569	7.14592	6.89972	0.0808494	0.0814733	-0.146178	-0.0682646	0.112714	0.190628	0.0442755
280	Cox20	3.42293e-05	0.333772	5.86511	5.74067	7.92355	7.09767	7.40467	5.82854	4.50297e-05	0.493868	0.378336	0.404725	0.238224	0.264614	0.299614
281	Hnrnpu	1.78993e-06	0.0125966	14.5716	13.352	16.1501	19.1756	18.0509	14.2132	2.49939e-06	0.055263	0.1393	0.256971	0.373691	0.491362	0.324537
282	Efcab2	0.189298	0.313541	1.03288	1.13772	1.51467	1.27898	1.36659	1.06369	0.199876	0.474263	0.306841	0.234294	0.164864	0.0923182	0.197586
283	Tfb2m	1.6452e-12	0.867301	2.9874	2.84029	0.990894	0.748326	0.838495	2.94417	3.00608e-12	0.914649	-1.00203	-0.947799	-1.18948	-1.13524	-1.1012
284	Cnst	0.082273	0.205643	6.2505	6.77876	7.70258	7.12165	7.3376	6.40574	0.0894641	0.353896	0.263362	0.161903	0.163691	0.0622318	0.170988
285	Sccpdh	7.92965e-25	0.517875	5.94888	6.37449	10.1511	11.1451	10.7756	6.07395	4.18689e-24	0.660417	0.682339	0.596576	0.805519	0.719756	0.735213
286	Cdc42bpa	4.66071e-23	0.0441068	0.270167	0.510546	1.25739	2.10449	1.78959	0.340805	2.26834e-22	0.126064	0.829634	0.579583	1.28934	1.03928	1.05696
287	Coq8a	0.00364042	0.0403484	15.8662	14.7912	16.414	17.9229	17.362	15.5503	0.00434019	0.118487	0.0461152	0.14113	0.165994	0.261009	0.149864
288	Psen2	3.97888e-12	0.00195525	2.83206	2.2158	3.96645	5.54078	4.95556	2.65097	7.09967e-12	0.0182017	0.374094	0.627035	0.771342	1.02428	0.705958
289	Itpkb	0.00266751	0.0263048	6.20304	5.58632	6.41936	7.59352	7.15706	6.02181	0.00320627	0.0884298	0.0426903	0.171823	0.254645	0.383777	0.216206
290	Parp1	1.94532e-07	0.231908	1.40114	1.75267	2.1158	3.05316	2.70472	1.50444	2.82708e-07	0.384049	0.375881	0.178768	0.755329	0.558216	0.564875
291	H3f3a	2.02448e-34	0.755302	4.39012	5.0318	8.35418	9.20352	8.8878	4.57868	1.78414e-33	0.840406	0.795294	0.633021	0.920678	0.758406	0.825724
292	Sde2	5.4533e-15	0.618458	0.990726	1.19368	2.74112	3.18777	3.02173	1.05037	1.29668e-14	0.740446	0.910174	0.770113	1.07289	0.932825	0.971935
293	Ephx1	1.6093e-21	0.872732	1.90458	2.36398	4.50296	5.05385	4.84907	2.03958	7.33785e-21	0.917521	0.92188	0.710038	1.05952	0.847682	0.944336
294	Cnih4	0.000529875	0.44399	5.12968	5.27662	6.76375	6.38104	6.5233	5.17286	0.000659982	0.59859	0.340943	0.306767	0.268013	0.233836	0.285428
295	Wdr26	0.0011666	0.0620783	17.2041	18.091	16.6082	20.6555	19.151	17.4647	0.00142904	0.159223	-0.0480123	-0.116642	0.250473	0.181843	0.126083
296	Lbr	2.09536e-18	0.0790851	14.6311	14.1048	20.2196	22.5239	21.6673	14.4764	7.9575e-18	0.186693	0.44098	0.490394	0.589713	0.639126	0.550545
297	Enah	8.50917e-24	0.000101478	8.32312	6.47562	11.5721	13.8811	13.0228	7.78021	4.25808e-23	0.00281693	0.43134	0.749959	0.674594	0.993213	0.675443
298	Srp9	7.01899e-12	0.0635842	19.1204	21.4959	24.4534	24.3322	24.3772	19.8185	1.23179e-11	0.161365	0.339199	0.178195	0.332313	0.171309	0.285671
299	Degs1	8.59163e-47	0.203185	1.4794	1.73756	5.75088	6.79711	6.4082	1.55526	1.5712e-45	0.350869	1.44508	1.30218	1.65295	1.51005	1.53565
300	Fbxo28	1.76668e-24	0.769091	1.78611	2.13629	4.97018	5.5088	5.30858	1.88901	9.15795e-24	0.849124	1.09952	0.928717	1.22414	1.05334	1.12674
301	Capn2	1.58373e-51	0.0219441	3.019	3.99368	9.64429	13.0046	11.7555	3.30542	3.79116e-50	0.078873	1.40517	1.0919	1.80099	1.48772	1.56689
302	Aida	6.01511e-39	0.0298655	2.4255	2.76008	6.64846	8.70534	7.94074	2.52382	7.07045e-38	0.0965896	1.15885	1.02441	1.50246	1.36802	1.34325
303	Mia3	2.44962e-05	0.113347	8.35307	9.8666	7.001	10.0326	8.90568	8.79783	3.24206e-05	0.238034	-0.22526	-0.441648	0.238263	0.0218748	0.0157932
304	Dusp10	5.09243e-06	0.0452582	5.80091	5.80298	6.56571	8.36077	7.6935	5.80152	6.9581e-06	0.128179	0.153748	0.153308	0.4609	0.46046	0.35408
305	Mtarc2	4.11789e-13	0.124652	9.57383	11.5763	13.3467	13.8288	13.6496	10.1623	7.86302e-13	0.253528	0.440221	0.190011	0.487903	0.237694	0.392229
306	C130074G19Rik	2.15977e-18	0.479093	1.03043	1.43637	2.68905	3.41567	3.14557	1.14972	8.18024e-18	0.627838	0.861467	0.598517	1.12085	0.857897	0.947421
307	Bpnt1	0.0668118	0.254445	0.406768	0.658262	0.775813	0.737442	0.751706	0.480672	0.0732214	0.409515	0.336096	0.0988076	0.304581	0.0672933	0.242509
308	Eprs	0.863988	0.474801	39.7481	40.4226	41.2741	40.0352	40.4957	39.9463	0.867245	0.624711	0.0530419	0.0293556	0.0101284	-0.0135579	0.0192291
309	Tgfb2	5.31245e-22	0.769832	7.6602	10.2213	11.0915	13.9509	12.888	8.41281	2.47122e-21	0.849446	0.48152	0.107751	0.787757	0.413988	0.561138
310	Pdcd5-ps	4.74525e-12	0.0140833	5.40113	5.65684	8.01845	6.91911	7.32777	5.47628	8.42831e-12	0.059122	0.494553	0.438042	0.307011	0.2505	0.362765
311	Ptpn14	1.07102e-17	0.32718	0.33427	0.559474	1.36257	1.88165	1.68869	0.400448	3.79984e-17	0.487579	0.824306	0.599297	1.11085	0.885836	0.941017
312	Smyd2	8.11131e-20	1.22465e-07	35.8744	51.5073	39.7486	43.1117	41.8615	40.4683	3.38183e-19	1.86368e-05	0.144129	-0.36577	0.25854	-0.251358	0.0476738
313	Angel2	0.00385694	0.855116	1.22521	1.52125	1.7213	2.09277	1.95468	1.31221	0.00459383	0.906719	0.290351	0.110155	0.474953	0.294757	0.353731
314	Nenf	3.25758e-22	0.806336	13.0662	13.9329	19.6223	20.8332	20.3831	13.3209	1.52785e-21	0.873474	0.551976	0.465716	0.63429	0.548029	0.578349
315	Ppp2r5a	0.00991766	0.00213498	9.06156	8.25275	7.81327	9.85807	9.09796	8.82388	0.0115257	0.0189634	-0.191105	-0.070204	0.109913	0.230814	0.0396985
316	Lpgat1	0.157926	0.0516602	7.00251	5.83264	5.93013	6.48337	6.27772	6.65873	0.167644	0.140162	-0.207571	0.020438	-0.0967639	0.131245	-0.0736201
317	Gstp-ps	1.74859e-33	0.431393	35.9515	37.8924	50.1233	50.3762	50.2822	36.5218	1.4595e-32	0.587243	0.468348	0.394493	0.475469	0.401614	0.450728
318	Rcor3	0.457667	0.66717	2.78316	3.08256	2.67443	3.22187	3.01837	2.87114	0.468778	0.777362	-0.0420712	-0.151953	0.158291	0.0484088	0.0538523
319	G0s2	0.356443	0.375855	0.469219	0.667477	0.390862	0.387235	0.388584	0.527479	0.368106	0.536522	-0.0790694	-0.261687	-0.0828365	-0.265454	-0.137538
320	Cd34	1.30114e-56	0.718468	0.360599	0.463863	4.23356	4.49792	4.39965	0.390944	4.2001e-55	0.814088	1.94355	1.83801	2.01464	1.9091	1.9568
321	Cr1l	2.20521e-17	0.572415	2.57973	2.69853	5.45411	5.97941	5.78414	2.61464	7.54732e-17	0.706054	0.850368	0.803265	0.963256	0.916152	0.908315
322	Cdnf	0.52552	0.987731	1.32282	1.46024	1.53278	1.66403	1.61524	1.3632	0.535512	0.992885	0.124844	0.041919	0.197734	0.114809	0.1462
323	Prpf18	2.25322e-07	0.146827	6.10285	6.83502	8.69906	8.28555	8.43927	6.318	3.26342e-07	0.283205	0.449448	0.307908	0.386591	0.245052	0.367225
324	Sephs1	2.32348e-06	0.245426	0.40269	0.562432	0.929124	1.51123	1.29484	0.449632	3.23013e-06	0.398613	0.45975	0.304153	0.840197	0.6846	0.662709
325	Phyh	0.0519051	0.00885805	16.5847	14.6387	14.7365	16.0718	15.5755	16.0128	0.0574685	0.0444572	-0.160206	0.00899395	-0.0427006	0.1265	-0.0375752
326	Optn	8.97709e-34	0.00325928	5.63186	7.7725	1.93709	2.01899	1.98855	6.26091	7.635e-33	0.0241597	-1.17503	-1.5786	-1.13535	-1.53892	-1.28071
327	Cdc123	5.81394e-06	0.203921	4.3432	5.42142	6.00954	6.23414	6.15065	4.66005	7.91981e-06	0.351714	0.391616	0.126429	0.437118	0.17193	0.337261
328	Sec61a2	5.93625e-08	0.146822	2.94382	3.28619	5.20202	4.61917	4.83583	3.04443	8.80111e-08	0.283205	0.653144	0.533042	0.510762	0.390661	0.529002
329	Upf2	1.68463e-08	0.259788	4.91239	4.81245	2.72069	3.30946	3.0906	4.88302	2.54772e-08	0.415281	-0.668171	-0.643578	-0.456233	-0.43164	-0.524245
330	Celf2	4.49618e-30	1.91652e-06	90.3276	84.0542	115.113	155.615	140.559	88.4841	3.09004e-29	0.000142274	0.346406	0.449073	0.778102	0.880769	0.661704
331	Atp5c1	1.60708e-11	0.00576059	190.027	182.1	189.681	164.063	173.586	187.698	2.76678e-11	0.03395	-0.0026196	0.0585305	-0.210763	-0.149613	-0.112141
332	Kin	0.00221782	0.721332	0.265856	0.369402	0.516483	0.69013	0.62558	0.296284	0.00267785	0.815711	0.260616	0.147183	0.417021	0.303588	0.326573
333	Itih5	4.16163e-61	0.239061	0.86753	1.30979	6.33202	7.54056	7.09131	0.997492	1.7931e-59	0.392162	1.97308	1.66645	2.1932	1.88657	2.01818
334	Prkcq	1.59392e-09	0.920554	11.2762	10.1177	15.2948	14.0196	14.4936	10.9358	2.50338e-09	0.949868	0.408541	0.551547	0.290974	0.433981	0.376377
335	Pfkfb3	9.56387e-55	0.016256	6.26462	7.20703	16.4992	21.0616	19.3656	6.54156	2.76282e-53	0.0649175	1.26833	1.09236	1.60258	1.4266	1.4332
336	Rbm17	0.000598245	0.394701	6.76267	7.88951	6.98369	8.89889	8.18696	7.0938	0.000744052	0.553293	0.040504	-0.155048	0.350715	0.155163	0.18277
337	Pter	0.0339603	0.191711	8.7042	8.93051	10.6813	9.57004	9.98311	8.7707	0.0381304	0.337623	0.267515	0.234256	0.123301	0.090042	0.168753
338	Rsu1	4.11359e-22	0.0743749	8.51268	9.58852	15.7664	14.6182	15.045	8.82883	1.92088e-21	0.178683	0.817651	0.663074	0.715302	0.560724	0.707033
339	Vim	4.79845e-42	0.00742668	10.0862	10.9412	58.4766	83.1683	73.9897	10.3374	6.74792e-41	0.0398804	2.42356	2.31638	2.92451	2.81733	2.7256
340	Hacd1	4.00379e-66	0.00201132	26.8107	30.2966	53.2642	49.5031	50.9012	27.835	2.41988e-64	0.018332	0.964363	0.793996	0.860735	0.690368	0.847946
341	Stam	5.72099e-21	0.105397	0.356011	0.394016	1.6852	2.30112	2.07216	0.367179	2.54193e-20	0.226646	0.985662	0.945783	1.28359	1.24371	1.16805
342	Arl5b	1.02575e-05	0.440752	0.276139	0.358486	0.666035	0.926073	0.82941	0.300337	1.38095e-05	0.596204	0.384633	0.294418	0.593877	0.503662	0.492492
343	Plxdc2	2.34869e-40	0.15763	0.371687	0.677692	5.03177	6.41946	5.90362	0.461609	3.02807e-39	0.29654	2.13663	1.8461	2.43536	2.14484	2.2398
344	Commd3	1.32021e-15	0.0102776	15.946	16.2981	22.9919	19.9916	21.1069	16.0495	3.43431e-15	0.0487398	0.501599	0.47193	0.308867	0.279198	0.374768
345	Bmi1	0.00049036	0.26961	12.5588	11.4965	14.247	14.4148	14.3524	12.2466	0.000612286	0.426914	0.169297	0.286996	0.185084	0.302784	0.212838
346	Msrb2	0.895894	0.463248	0.433604	0.519592	0.525759	0.45598	0.481919	0.458872	0.897896	0.614348	0.0898805	0.00584382	0.022344	-0.0616928	0.0226129
347	Etl4	5.19527e-23	0.0066146	5.21374	5.28691	7.5898	9.75714	8.95148	5.23524	2.52418e-22	0.0369153	0.467164	0.450274	0.791762	0.774872	0.674466
348	Pdss1	0.000534189	0.450251	0.284572	0.580917	0.779135	0.879773	0.842363	0.371656	0.00066516	0.603198	0.469888	0.170415	0.54927	0.249797	0.425639
349	Acbd5	2.58025e-13	0.398589	0.496983	0.85807	1.93379	1.98881	1.96835	0.603092	5.00887e-13	0.557214	0.970707	0.65896	0.997511	0.685764	0.888806
350	Yme1l1	0.0127452	0.0153711	19.2043	19.5605	22.324	18.9	20.1728	19.309	0.0146984	0.0626757	0.207155	0.18194	-0.0218938	-0.0471093	0.0600947
351	Zmynd19	0.00158114	0.772536	0.298119	0.560836	0.477184	0.804607	0.682895	0.375321	0.00192245	0.851091	0.186427	-0.079469	0.475263	0.209366	0.291177
352	Mrpl41	4.42912e-08	0.069554	3.17986	2.95538	5.49194	4.16161	4.65613	3.1139	6.59877e-08	0.170769	0.635195	0.714833	0.304365	0.384003	0.45931
353	Tubb4b	3.76799e-34	0.0300916	14.9548	17.5882	21.8447	28.1609	25.813	15.7286	3.26661e-33	0.0970264	0.517868	0.297469	0.870046	0.649647	0.680611
354	Ssna1	0.197289	0.939762	1.17963	1.23951	1.52051	1.609	1.57611	1.19723	0.20803	0.960731	0.209631	0.17053	0.259417	0.220316	0.22951
355	Anapc2	1.7284e-37	0.00911181	6.92672	6.92219	12.5704	15.4971	14.4092	6.92539	1.85276e-36	0.045234	0.775672	0.776498	1.05742	1.05824	0.959237
356	Entpd2	2.67648e-53	0.730624	4.64162	5.15208	12.7035	13.552	13.2366	4.79163	6.99662e-52	0.822942	1.28036	1.1554	1.36704	1.24207	1.29757
357	Abca2	0.0364785	0.2504	1.62419	1.52759	0.80713	1.21186	1.06141	1.5958	0.0408662	0.404762	-0.538171	-0.484063	-0.246611	-0.192503	-0.332549
358	Fbxw5	3.09846e-07	0.582913	5.48715	6.17946	3.52617	3.81	3.70449	5.6906	4.45806e-07	0.713118	-0.519294	-0.665584	-0.43155	-0.57784	-0.508096
359	Edf1	0.0108408	0.951892	9.52215	10.7515	10.041	11.3287	10.85	9.88342	0.0125575	0.969156	0.0694364	-0.0899844	0.228592	0.0691713	0.122757
360	Mamdc4	0.125251	0.622758	1.55108	1.47135	1.89185	2.00664	1.96397	1.52765	0.134229	0.744235	0.180881	0.226689	0.237044	0.282852	0.229732
361	Phpt1	0.000514235	0.575351	10.7522	11.6917	8.82755	10.2518	9.72236	11.0283	0.000641251	0.707626	-0.258033	-0.368985	-0.0627829	-0.173734	-0.165813
362	Rabl6	0.106741	0.0337976	1.3578	1.04658	0.733052	1.24098	1.05217	1.26635	0.115057	0.104584	-0.444127	-0.2399	-0.0733145	0.130913	-0.14322
363	Bmyc	0.000675768	0.327248	0.341568	0.582482	0.460469	0.957307	0.772618	0.412363	0.000838512	0.487579	0.122512	-0.115758	0.54495	0.30668	0.327771
364	Camsap1	0.000276789	0.998121	10.3324	11.5345	7.56058	8.75965	8.31392	10.6856	0.000350073	0.999104	-0.404672	-0.550119	-0.21555	-0.360998	-0.327274
365	Ubac1	0.102399	0.0587621	20.0343	21.8022	20.1441	19.3398	19.6388	20.5538	0.110518	0.153847	0.0075111	-0.108916	-0.0484363	-0.164864	-0.0625837
366	Nacc2	2.06269e-08	0.000301121	22.5699	19.7477	23.7541	29.3978	27.2999	21.7406	3.10679e-08	0.00588568	0.070721	0.254718	0.367019	0.551016	0.315527
367	Dnlz	0.0818651	0.0252367	8.73849	8.29908	7.39438	9.00019	8.40327	8.60937	0.0890319	0.0859583	-0.214274	-0.147663	0.0382571	0.104868	-0.0312792
368	Entr1	0.0589851	0.244474	1.09975	1.33686	0.919846	1.65484	1.38162	1.16943	0.0649697	0.397369	-0.12923	-0.283578	0.338405	0.184057	0.13463
369	Pmpca	0.000946276	0.830484	4.5403	5.57075	3.14446	4.33251	3.89088	4.84311	0.00116618	0.890267	-0.418781	-0.664873	-0.0551502	-0.301242	-0.256642
370	Sec16a	3.28678e-07	0.448827	0.277919	0.391427	0.808192	1.12237	1.00558	0.311274	4.72343e-07	0.602536	0.500752	0.377982	0.731881	0.609111	0.613051
371	Egfl7	9.19405e-25	0.0606197	0.471594	0.588739	1.93662	2.75671	2.45186	0.506019	4.83056e-24	0.15688	0.996778	0.886276	1.35209	1.24159	1.19664
372	Surf1	0.0253945	0.22026	0.391888	0.524117	0.846119	0.685815	0.745404	0.430745	0.0288088	0.370739	0.407452	0.276522	0.276403	0.145473	0.286795
373	Surf4	3.10754e-36	0.00764012	12.9113	14.3617	18.993	24.2748	22.3114	13.3375	3.09737e-35	0.0406171	0.523241	0.380158	0.861446	0.718362	0.701244
374	Cacfd1	2.96377e-56	0.057956	0.546513	0.677992	3.87609	4.84763	4.48648	0.585149	9.35453e-55	0.152439	1.6567	1.53899	1.91883	1.80112	1.79126
375	Brd3	0.00618023	0.86848	3.21071	3.95678	1.94975	2.56965	2.33922	3.42995	0.00727658	0.915196	-0.513472	-0.748812	-0.238281	-0.473621	-0.407781
376	Wdr5	1.62219e-08	0.00911112	3.1874	2.59844	4.16317	5.49166	4.99782	3.01433	2.45547e-08	0.045234	0.302201	0.520884	0.632531	0.851215	0.579279
377	Rxra	1.50372e-09	0.000115234	13.1461	13.8858	11.2974	17.7009	15.3205	13.3635	2.36564e-09	0.00305536	-0.202048	-0.275577	0.402699	0.32917	0.184284
378	Col5a1	1.93482e-60	2.42809e-05	2.78627	3.54744	17.4404	28.4417	24.3522	3.00995	8.00414e-59	0.00100937	2.28402	2.01974	2.95901	2.69473	2.66046
379	Mrps2	0.344834	0.909582	1.86339	2.29662	2.05142	2.42111	2.28369	1.9907	0.356549	0.942541	0.091755	-0.111506	0.256739	0.0534776	0.134833
380	Tsc1	0.191235	0.540726	1.2625	1.79502	1.46006	1.72449	1.62619	1.41898	0.201846	0.679956	0.120778	-0.184167	0.26807	-0.0368755	0.118572
381	Rapgef1	2.19869e-14	2.52303e-05	41.0232	42.1871	40.3789	55.5022	49.8805	41.3652	4.79336e-14	0.00104042	-0.0222914	-0.0617033	0.42712	0.387708	0.264231
382	Trub2	5.50308e-05	0.314224	0.402379	0.459717	0.802848	1.14785	1.01961	0.419228	7.16536e-05	0.474831	0.362402	0.304589	0.61502	0.557207	0.508967
383	Sptan1	1.68927e-38	0.233534	1.5505	1.69901	5.08104	5.91818	5.60699	1.59414	1.93755e-37	0.385859	1.25354	1.17189	1.43961	1.35796	1.34874
384	Set	5.50405e-08	0.00175239	14.6081	14.3393	14.9853	20.3438	18.3519	14.5291	8.17454e-08	0.0170892	0.0344568	0.0595167	0.451526	0.476585	0.317503
385	Zer1	5.50014e-14	0.0941946	3.3186	3.03625	5.29771	6.15177	5.83429	3.23563	1.14128e-13	0.210193	0.544265	0.641812	0.727737	0.825284	0.690216
386	Endog	1.35814e-10	0.450007	3.5788	3.14683	1.83468	1.77778	1.79893	3.45186	2.23007e-10	0.603171	-0.691786	-0.548826	-0.721039	-0.578079	-0.669534
387	Kyat1	0.0021446	0.895001	1.08239	1.50841	1.56955	1.9441	1.80487	1.20758	0.00259165	0.933507	0.303275	0.0347408	0.499589	0.231055	0.345469
388	Lrrc8a	0.0278283	0.0310914	6.4552	5.59612	6.38782	7.60214	7.15074	6.20275	0.031461	0.0990248	-0.013099	0.16353	0.206448	0.383077	0.178383
389	Dolk	1.24767e-19	0.661305	0.269372	0.384355	1.85578	1.8286	1.8387	0.303161	5.15897e-19	0.773218	1.16977	1.04467	1.15597	1.03087	1.12322
390	Crat	0.000822439	0.00847796	22.5803	21.9221	18.6644	21.7341	20.593	22.3869	0.00101636	0.0432371	-0.261997	-0.221148	-0.0527246	-0.0118764	-0.115134
391	Ptpa	9.7618e-18	0.000283862	6.54958	5.31427	8.95904	11.8056	10.7474	6.18657	3.47785e-17	0.00569294	0.39961	0.65739	0.762302	1.02008	0.708969
392	Tor1b	2.28825e-30	0.203827	0.150533	0.416759	2.12945	2.01154	2.05537	0.228766	1.59188e-29	0.351628	1.44361	1.14331	1.3882	1.08791	1.31414
393	BC005624	0.01602	0.388755	8.01082	7.9714	8.92446	9.77095	9.45629	7.99924	0.0183843	0.54909	0.139331	0.145656	0.257415	0.263741	0.216496
394	Fnbp1	6.75793e-30	0.00865169	1.91949	2.13561	5.36609	7.86496	6.93606	1.983	4.60728e-29	0.0437306	1.12469	1.02166	1.6024	1.49937	1.41166
395	Gpr107	1.39719e-55	0.2143	0.476807	0.621475	4.3446	5.0954	4.81631	0.519319	4.17783e-54	0.364087	1.8556	1.72077	2.04524	1.91042	1.93668
396	Abl1	4.22118e-36	0.00908567	1.65082	1.68161	4.76108	6.47085	5.83528	1.65987	4.16353e-35	0.0452003	1.1199	1.10324	1.49483	1.47817	1.36165
397	Nup214	2.97704e-09	0.181355	0.23827	0.391912	0.801009	1.35727	1.15049	0.283419	4.62709e-09	0.32548	0.54048	0.371738	0.928791	0.760049	0.744675
398	Plpp7	4.27614e-23	0.835049	0.370286	0.826369	2.26672	2.64116	2.50197	0.50431	2.08355e-22	0.893557	1.25337	0.838865	1.40992	0.99542	1.21906
399	Prrc2b	2.14018e-16	0.136729	9.35535	10.5602	11.8156	14.5001	13.5022	9.70941	6.35936e-16	0.269911	0.307529	0.148736	0.581905	0.423112	0.437396
400	Swi5	0.0155701	0.556131	30.267	30.0601	32.572	33.5432	33.1821	30.2062	0.0178825	0.692178	0.102615	0.112197	0.143758	0.15334	0.13141
401	1110008P14Rik	8.95889e-05	0.00933746	22.29	26.1261	27.3998	26.2218	26.6597	23.4172	0.000115766	0.0459168	0.286175	0.0662009	0.225052	0.00507801	0.179884
402	Ptges2	9.0739e-09	0.628458	3.53747	3.97449	2.07283	2.27174	2.1978	3.66589	1.38481e-08	0.748188	-0.562321	-0.69498	-0.471831	-0.604491	-0.545074
403	Dpm2	2.91865e-20	0.677019	2.80904	3.73804	6.36115	6.96762	6.74218	3.08204	1.24488e-19	0.784866	0.950503	0.635642	1.06472	0.749858	0.92345
404	St6galnac6	1.06368e-18	0.0270962	0.985461	1.3247	2.37149	3.89651	3.32961	1.08515	4.14102e-18	0.0901302	0.763911	0.53634	1.30228	1.07471	1.05409
405	Ak1	1.50046e-28	0.00150702	163.878	174.202	175.966	204.597	193.954	166.911	9.49991e-28	0.015894	0.102077	0.0144541	0.318424	0.230801	0.215434
406	Angptl2	1.0438e-128	1.52998e-06	0.402357	0.559636	9.10975	12.3847	11.1673	0.448575	1.77906e-125	0.000121855	2.84982	2.69647	3.25466	3.1013	3.0703
407	Mvb12b	2.19709e-16	0.936064	0.318161	0.509406	1.38877	1.60179	1.5226	0.374361	6.51092e-16	0.95856	0.85774	0.662285	0.980977	0.785522	0.876153
408	Mapkap1	4.89982e-05	0.000923983	8.1893	7.82817	7.26607	10.4218	9.24872	8.08318	6.40237e-05	0.01204	-0.152752	-0.0949114	0.313762	0.371603	0.174175
409	Gapvd1	1.18311e-09	0.00242838	7.88583	7.7141	8.6502	11.6166	10.5139	7.83537	1.86747e-09	0.0202096	0.119052	0.147206	0.505748	0.533902	0.382018
410	Hspa5	2.40133e-23	0.176125	18.9437	19.2896	27.2183	30.2217	29.1053	19.0454	1.18153e-22	0.318809	0.500697	0.475891	0.646614	0.621808	0.586747
411	Fbxw2	0.00267957	0.615419	1.71324	2.15852	2.60553	2.78765	2.71995	1.84409	0.00321986	0.73826	0.410194	0.190961	0.481286	0.262054	0.387316
412	Rab14	3.68772e-12	0.0737557	12.8927	13.0134	16.0617	18.6781	17.7055	12.9282	6.5981e-12	0.178008	0.29643	0.283953	0.502258	0.489781	0.425454
413	Gsn	8.63965e-49	0.274121	136.383	180.976	225.549	286.965	264.135	149.487	1.76141e-47	0.431884	0.721623	0.316078	1.06769	0.66215	0.817091
414	Stom	5.68258e-54	0.0154078	10.4925	9.95111	20.6167	23.4975	22.4266	10.3334	1.5723e-52	0.0627478	0.911452	0.981072	1.09193	1.16155	1.04756
415	Dab2ip	0.0375009	0.0614846	2.40384	2.48329	1.9251	3.0286	2.6184	2.42718	0.0419565	0.158587	-0.218674	-0.251964	0.243117	0.209827	0.0783278
416	Ndufa8	0.000502871	0.000215485	126.746	114.142	109.721	121.198	116.932	123.042	0.000627356	0.00478219	-0.206347	-0.0564771	-0.0640609	0.0858091	-0.0728795
417	Rbm18	3.54444e-07	0.314505	1.10808	1.22781	2.51562	2.19737	2.31568	1.14326	5.08513e-07	0.474963	0.73785	0.658156	0.600956	0.521262	0.629493
418	Mrrf	0.193247	0.936881	5.70784	5.22327	6.45634	5.91511	6.1163	5.56545	0.203818	0.959011	0.15262	0.260795	0.0439038	0.152078	0.116235
419	Rc3h2	0.000332032	0.663272	1.17511	1.7927	1.92164	2.33448	2.18102	1.3566	0.000418329	0.774938	0.42569	0.0651197	0.616371	0.255801	0.432783
420	Rabgap1	0.820491	0.671939	3.50901	3.62888	3.39932	3.78425	3.64116	3.54423	0.824555	0.78091	-0.0355294	-0.0733846	0.085484	0.0476288	0.030449
421	Nek6	1.64409e-13	0.423939	0.877452	1.23667	2.13749	2.84559	2.58237	0.983012	3.25684e-13	0.579905	0.740835	0.488259	1.03443	0.781855	0.853222
422	Psmb7	9.86821e-07	0.000300154	37.9131	47.8418	44.4134	44.038	44.1776	40.8307	1.39395e-06	0.00588568	0.222864	-0.104998	0.210888	-0.116974	0.111043
423	Arpc5l	0.00191893	0.0495322	17.6661	20.801	17.3515	17.9966	17.7568	18.5873	0.00232354	0.135597	-0.0245261	-0.248501	0.0253176	-0.198658	-0.0625102
424	Ppp6c	5.11319e-13	0.640934	10.8708	11.1502	14.3574	15.1204	14.8368	10.9529	9.67895e-13	0.757879	0.371512	0.337951	0.441467	0.407906	0.405914
425	Gtdc1	2.46906e-07	0.956915	3.48972	4.10827	1.73203	2.31805	2.10021	3.67149	3.57057e-07	0.972714	-0.716655	-0.902863	-0.436291	-0.622499	-0.591517
426	Acvr2a	0.00215028	0.0191638	6.03922	7.9118	7.35832	7.32625	7.33817	6.5895	0.00259814	0.0719763	0.247797	-0.0925038	0.24225	-0.0980507	0.135726
427	Mmadhc	0.0137277	0.170476	33.7794	36.3747	37.2892	37.081	37.1584	34.542	0.0158006	0.311692	0.138705	0.0348781	0.130839	0.0270121	0.102474
428	Neb	1.61329e-11	0.848948	465.039	519.453	531.579	580.876	562.551	481.029	2.77635e-11	0.902086	0.192545	0.0332282	0.320262	0.160945	0.225427
429	Arl5a	0.124838	0.418331	2.06395	2.75069	2.08318	2.40462	2.28513	2.26575	0.133804	0.575002	0.00902653	-0.282736	0.152102	-0.139661	0.0085353
430	Prpf40a	2.99891e-05	0.362317	5.36862	5.82121	6.53619	7.78272	7.31935	5.50162	3.95738e-05	0.52289	0.242855	0.143807	0.463688	0.36464	0.355672
431	Gpd2	8.88585e-12	0.399326	12.9207	15.9013	14.0553	18.05	16.5651	13.7966	1.55079e-11	0.557695	0.113037	-0.16686	0.452555	0.172659	0.247443
432	Acvr1	3.45326e-41	0.000332211	2.68648	3.30697	5.5346	8.67184	7.50564	2.86882	4.61988e-40	0.0062222	0.825856	0.601424	1.39155	1.16712	1.13653
433	Pkp4	0.00743551	0.117628	2.07869	1.41543	1.06026	1.21811	1.15943	1.88378	0.00870045	0.244259	-0.579487	-0.229455	-0.472987	-0.122955	-0.417312
434	Tanc1	1.87698e-21	0.337386	0.273303	0.423858	1.40125	1.81696	1.66243	0.317545	8.52647e-21	0.496925	0.915211	0.753981	1.14556	0.984335	1.01489
435	Baz2b	1.11406e-33	0.000306603	2.53968	1.88397	5.99482	8.36984	7.48698	2.34699	9.42805e-33	0.00593083	0.982666	1.27823	1.4044	1.69997	1.34238
436	Marchf7	0.00520238	0.266911	1.23075	1.66546	2.09583	2.03224	2.05588	1.35849	0.00615076	0.424053	0.472798	0.215942	0.442856	0.186001	0.373722
437	Itgb6	1.33349e-27	0.673339	1.59298	2.24125	4.95977	5.35434	5.20767	1.78348	8.01412e-27	0.781877	1.20065	0.878705	1.29313	0.971189	1.15716
438	Rbms1	2.32038e-29	0.00192999	15.0602	15.5519	22.7874	30.1435	27.4091	15.2047	1.53885e-28	0.018107	0.56671	0.5232	0.955446	0.911936	0.809941
439	Tank	2.63883e-16	0.545658	0.274859	0.513663	1.36527	1.4504	1.41875	0.345034	7.70933e-16	0.683589	0.891664	0.643958	0.942678	0.694972	0.84662
440	Psmd14	7.02518e-23	0.0486519	17.3185	21.5469	25.5353	26.6249	26.2199	18.561	3.39969e-22	0.134265	0.534611	0.234982	0.592671	0.293042	0.476677
441	Grb14	1.18987e-14	0.1995	2.80535	2.70085	6.14521	5.14285	5.51545	2.77464	2.68967e-14	0.346755	0.908946	0.949121	0.690877	0.731052	0.787525
442	Xirp2	6.90984e-05	0.0123065	254.319	260.873	243.927	280.782	267.082	256.245	8.96964e-05	0.0546663	-0.0599481	-0.0965169	0.142281	0.105713	0.0595329
443	Klhl41	1.73888e-31	0.00978624	69.5199	77.465	94.679	93.2056	93.7533	71.8546	1.29309e-30	0.0471443	0.440173	0.286154	0.417782	0.263764	0.379156
444	Ppig	0.198809	0.111014	17.6953	17.5022	16.3166	19.2142	18.1371	17.6386	0.209581	0.234581	-0.110525	-0.0955453	0.112687	0.127667	0.0380754
445	Phospho2	0.321707	0.600845	2.24789	2.36324	1.90135	1.70277	1.77659	2.28179	0.333283	0.726092	-0.162777	-0.213124	-0.265064	-0.315411	-0.241167
446	Ssb	5.43506e-26	0.345539	12.1851	12.7643	20.5379	19.8015	20.0752	12.3553	3.04121e-25	0.505786	0.707964	0.645945	0.657773	0.595753	0.658131
447	Ubr3	3.02359e-06	0.507745	21.6271	25.2453	23.6945	26.2797	25.3187	22.6903	4.18296e-06	0.651265	0.126137	-0.0878725	0.269776	0.0557667	0.151789
448	Gorasp2	2.18023e-18	0.192819	5.91704	6.44814	8.79064	10.441	9.82752	6.07311	8.25042e-18	0.339084	0.501249	0.394522	0.725988	0.619261	0.614287
449	Tlk1	3.62971e-07	0.500625	4.76389	4.94916	2.70398	3.32573	3.09461	4.81833	5.20572e-07	0.645284	-0.637969	-0.68361	-0.414101	-0.459742	-0.506882
450	Dync1i2	1.11991e-53	0.103791	38.6298	41.7212	60.6022	68.7289	65.708	39.5382	3.03946e-52	0.224039	0.636396	0.528029	0.815171	0.706804	0.718576
451	Slc25a12	0.00465608	0.564867	49.8762	51.124	45.0278	47.643	46.6709	50.2429	0.00551942	0.699578	-0.144486	-0.179445	-0.0647571	-0.0997162	-0.104244
452	Hat1	1.72643e-20	0.583308	0.346872	0.445906	2.05034	1.96586	1.99726	0.375974	7.46077e-20	0.713283	1.17936	1.077	1.13884	1.03648	1.12319
453	Itga6	4.4242e-14	0.176416	2.67705	3.00686	4.5404	5.79328	5.32755	2.77397	9.28646e-14	0.31913	0.59144	0.467517	0.885557	0.761635	0.745563
454	Pdk1	3.69529e-11	0.694802	3.65236	3.99679	1.93945	2.08769	2.03259	3.75358	6.2322e-11	0.797348	-0.662415	-0.765454	-0.591434	-0.694473	-0.648464
455	Map3k20	4.57586e-49	0.176731	30.2253	33.6333	47.4704	54.3878	51.8164	31.2268	9.53435e-48	0.319549	0.634389	0.484943	0.826852	0.677406	0.712725
456	Sp3	1.18592e-18	0.275052	0.340566	0.519685	1.93375	2.58748	2.34447	0.393202	4.598e-18	0.432631	1.12991	0.948975	1.42013	1.2392	1.26338
457	Ola1	7.9566e-06	0.113479	5.70226	6.06408	6.34303	7.89052	7.31527	5.80858	1.07578e-05	0.238195	0.131729	0.0558732	0.407621	0.331765	0.288409
458	Scrn3	0.673568	0.898856	1.1776	1.35576	0.972467	1.10049	1.0529	1.22996	0.680757	0.935979	-0.142738	-0.256194	-0.052013	-0.165469	-0.119351
459	Chrna1	1.39796e-92	7.65035e-05	0.259314	0.273294	13.1632	18.2903	16.3845	0.263422	3.84303e-90	0.00221756	3.49144	3.47551	3.93717	3.92124	3.78239
460	Atf2	2.24792e-16	0.0502753	0.371643	0.419852	1.06306	1.60492	1.40349	0.38581	6.64705e-16	0.137366	0.588879	0.539044	0.925333	0.875498	0.794404
461	Atp5g3	2.32328e-10	2.5985e-05	279.352	246.726	248.105	252.545	250.895	269.764	3.77051e-10	0.00106464	-0.170484	0.00801045	-0.144994	0.0335004	-0.104216
462	Mrpl23-ps1	3.12648e-05	0.0657015	6.73082	6.32332	7.46313	8.18716	7.91802	6.61107	4.12253e-05	0.164873	0.13057	0.208695	0.248997	0.327122	0.228624
463	Mtx2	2.51721e-12	0.504856	1.88716	1.7296	0.632676	0.689192	0.668183	1.84086	4.54389e-12	0.649122	-0.822413	-0.741452	-0.773319	-0.692358	-0.768051
464	Hnrnpa3	1.44909e-18	0.202714	7.62832	7.8077	11.1901	12.6207	12.0889	7.68103	5.57775e-18	0.350696	0.498561	0.468875	0.658653	0.628968	0.59241
465	Agps	8.30979e-06	0.108814	1.18424	1.1353	1.72957	2.37064	2.13234	1.16986	1.12282e-05	0.231481	0.321542	0.354238	0.625892	0.658588	0.52964
466	Osbpl6	0.00104972	0.0346873	1.6632	3.14393	2.07284	2.40059	2.27876	2.09833	0.0012905	0.106409	0.206414	-0.431424	0.352623	-0.285215	0.0816595
467	Plekha3	1.03386e-07	0.0461196	3.83843	4.2178	4.31391	5.91846	5.32201	3.94991	1.5167e-07	0.129713	0.135234	0.0263323	0.515913	0.407012	0.35298
468	Ttn	8.83299e-14	2.81486e-06	711.974	692.534	695.751	960.226	861.913	706.261	1.79354e-13	0.000185956	-0.033206	0.00667574	0.431027	0.470908	0.286972
469	Zfp385b	1.51116e-05	0.0947659	0.187521	0.298141	0.903867	0.630299	0.731992	0.220028	2.01946e-05	0.210767	0.680979	0.552485	0.457183	0.328689	0.505518
470	Ube2e3	0.0279001	0.0160836	4.60632	4.09821	4.25552	5.40471	4.97753	4.45701	0.0315338	0.0644707	-0.0932215	0.0438419	0.19208	0.329143	0.131438
471	Dnajc10	3.13586e-11	0.267193	5.56213	6.66935	8.56454	8.7509	8.68163	5.8875	5.30865e-11	0.424341	0.543532	0.318591	0.571372	0.346431	0.49127
472	Nckap1	1.04241e-15	0.00115762	13.0045	13.0957	14.7502	18.6761	17.2167	13.0313	2.75968e-15	0.0140165	0.169482	0.16012	0.490553	0.481191	0.376616
473	Dusp19	5.24358e-12	0.10978	2.60449	2.96432	5.55321	4.83001	5.09884	2.71023	9.28826e-12	0.232683	0.862404	0.725127	0.693702	0.556424	0.717026
474	Zc3h15	1.19208e-10	0.151989	17.3387	18.6272	20.0504	23.4996	22.2174	17.7173	1.96232e-10	0.289764	0.198958	0.100995	0.41787	0.319906	0.310836
475	Itgav	3.5256e-34	0.00933597	2.7954	2.65353	6.98764	9.15508	8.34938	2.75371	3.05959e-33	0.0459168	1.07352	1.12848	1.41988	1.47484	1.31655
476	Calcrl	3.86082e-12	0.209562	0.488042	0.702751	2.34841	2.00905	2.1352	0.551136	6.89624e-12	0.358109	1.17006	0.975608	1.01589	0.821438	1.01523
477	Ctnnd1	7.76771e-21	3.13193e-05	16.4237	14.3689	20.7055	27.4001	24.9115	15.8199	3.43342e-20	0.00120771	0.317012	0.498044	0.704847	0.88588	0.623428
478	Tmx2	3.31768e-19	0.52143	9.00223	9.73965	13.5201	14.9882	14.4425	9.21893	1.33617e-18	0.663524	0.537726	0.4351	0.676691	0.574064	0.595661
479	Zdhhc5	0.00137988	0.704394	3.53442	3.85561	2.36719	2.89441	2.69843	3.62881	0.00168423	0.804347	-0.429374	-0.528107	-0.219515	-0.318248	-0.323729
480	Serping1	4.56418e-49	0.126691	25.6468	26.0827	59.4379	54.158	56.1207	25.7749	9.53332e-48	0.256574	1.18149	1.15808	1.04961	1.0262	1.09313
481	Smtnl1	8.22929e-16	0.062082	4.12287	2.94772	1.5673	1.46399	1.50239	3.77754	2.2144e-15	0.159223	-0.9967	-0.620765	-1.05596	-0.680024	-0.932961
482	Timm10	0.118321	0.93878	4.73912	4.94579	3.76471	3.90671	3.85392	4.79986	0.126994	0.960073	-0.268443	-0.319482	-0.226075	-0.277113	-0.256866
483	Slc43a3	8.00977e-05	0.188272	0.242471	0.37619	0.367478	0.754652	0.610729	0.281766	0.00010369	0.333081	0.138306	-0.00916198	0.497972	0.350505	0.329581
484	Ssrp1	1.00442e-10	0.05467	1.10445	1.02491	2.08636	2.93042	2.61666	1.08108	1.66013e-10	0.146371	0.552464	0.60805	0.90124	0.956826	0.797328
485	Tnks1bp1	0.000209175	0.0165089	2.3054	1.39925	2.76116	3.37613	3.14753	2.03912	0.000266058	0.0655781	0.18635	0.648596	0.40483	0.867076	0.448598
486	Fnbp4	5.8416e-49	0.000608655	1.61343	1.75988	6.12694	9.06772	7.97455	1.65646	1.20538e-47	0.00922946	1.44734	1.36868	1.94572	1.86706	1.75633
487	Mtch2	0.115324	0.0210569	18.2136	19.629	20.2103	18.4633	19.1127	18.6296	0.123856	0.0766868	0.142637	0.0400937	0.0186274	-0.0839155	0.0350819
488	Ndufs3	0.00314282	0.706094	77.434	76.5678	71.5183	71.8303	71.7143	77.1794	0.00376326	0.805425	-0.113134	-0.0971135	-0.106939	-0.0909188	-0.104549
489	Ptpmt1	0.0833551	0.587121	10.4097	10.5638	11.0924	11.7584	11.5108	10.455	0.090583	0.715288	0.0838307	0.0644852	0.161177	0.141832	0.127196
490	Celf1	0.000906479	0.00413459	7.68955	7.45239	5.54809	7.68842	6.8928	7.61986	0.00111892	0.0276787	-0.408207	-0.368285	-0.000186726	0.0397355	-0.127126
491	Rapsn	0.000208106	0.03427	4.33792	3.6113	4.92368	5.60929	5.35443	4.1244	0.000264738	0.105424	0.150216	0.361322	0.308217	0.519323	0.310381
492	Psmc3	6.52112e-22	0.323843	46.5927	51.3268	63.554	72.6638	69.2774	47.9839	3.02191e-21	0.484759	0.439767	0.302957	0.630216	0.493406	0.520756
493	Pacsin3	2.85263e-12	0.00166642	15.2704	17.3468	14.2338	20.6718	18.2787	15.8806	5.13304e-12	0.0166519	-0.0949712	-0.268249	0.413574	0.240296	0.191642
494	Arfgap2	7.77001e-06	0.393511	4.21325	4.90348	2.90865	3.08472	3.01927	4.41608	1.05088e-05	0.552744	-0.415512	-0.594893	-0.351947	-0.531327	-0.430316
495	Atg13	9.43432e-21	0.345727	0.304827	0.569254	1.63826	2.22693	2.00811	0.382531	4.15715e-20	0.505887	1.01573	0.74951	1.3063	1.04008	1.12154
496	Phf21a	0.00869197	0.00469712	2.14312	1.91762	1.4767	2.64426	2.21025	2.07686	0.0101331	0.0300969	-0.343778	-0.236371	0.213427	0.320834	0.061227
497	Pex16	9.30343e-06	0.472134	4.86203	4.87848	2.86417	3.38575	3.19186	4.86686	1.25529e-05	0.622258	-0.601242	-0.605284	-0.418577	-0.422619	-0.484997
498	Trp53i11	5.0181e-26	0.00172092	0.29235	0.401803	2.02588	3.92034	3.21612	0.324514	2.81344e-25	0.0168765	1.22736	1.11007	1.92876	1.81147	1.67045
499	Ext2	3.77224e-19	0.000632366	7.18658	7.29697	9.07373	12.6852	11.3427	7.21902	1.51494e-18	0.00933638	0.299265	0.27994	0.741281	0.721956	0.586619
500	Alkbh3	3.49545e-07	0.878838	9.40545	9.63375	12.0627	12.1439	12.1137	9.47254	5.01654e-07	0.921666	0.32811	0.2968	0.337059	0.305749	0.324467
501	Api5	3.76045e-23	0.00126099	11.795	12.132	15.5892	20.7377	18.8239	11.894	1.83753e-22	0.0145589	0.374671	0.337164	0.764624	0.727117	0.62054
502	B230118H07Rik	0.126798	0.05803	20.4442	21.1776	22.8251	20.6959	21.4874	20.6597	0.135785	0.152586	0.151892	0.103375	0.0168361	-0.0316812	0.0541006
503	Traf6	1.86597e-13	0.840724	0.432916	0.810503	1.48019	1.92435	1.75924	0.543874	3.67907e-13	0.897488	0.791494	0.454057	1.02916	0.691728	0.837719
504	Trim44	1.60139e-07	0.416003	1.31182	1.50383	2.25074	2.81901	2.60777	1.36824	2.33363e-07	0.572923	0.491744	0.376632	0.724172	0.609061	0.607291
505	Cd44	7.9562e-60	0.000461726	3.71186	3.86076	47.753	70.7361	62.1926	3.75562	3.2134e-58	0.00762564	3.37112	3.32624	3.92833	3.88344	3.73205
506	Pdhx	0.0643523	0.395684	8.4699	8.60906	7.02715	7.90241	7.57706	8.51079	0.0706441	0.554244	-0.23846	-0.259506	-0.0891527	-0.110199	-0.149083
507	Apip	0.852356	0.455035	19.3004	19.9267	19.4764	18.9422	19.1407	19.4844	0.855871	0.607747	0.0124546	-0.0313821	-0.0256845	-0.0695211	-0.0244097
508	Cat	1.02121e-11	2.87171e-05	6.50255	4.43466	3.16454	4.17716	3.80074	5.89488	1.7721e-11	0.00113496	-0.849224	-0.384032	-0.535222	-0.0700298	-0.522269
509	Caprin1	1.30443e-17	0.150983	7.69163	8.32008	10.5923	12.5701	11.8349	7.87631	4.57838e-17	0.288234	0.415472	0.314756	0.642728	0.542012	0.532038
510	Fbxo3	9.9908e-27	0.0531512	16.3697	16.9446	22.3478	25.762	24.4928	16.5387	5.76059e-26	0.143113	0.42671	0.379731	0.62361	0.576631	0.539552
511	Cd59a	8.64094e-07	0.493363	5.19875	5.15078	7.28727	7.8852	7.66293	5.18466	1.22363e-06	0.640433	0.418919	0.430128	0.519425	0.530635	0.486162
512	Hipk3	1.0663e-32	0.525142	79.0244	92.3548	99.1694	109.932	105.931	82.9417	8.45302e-32	0.666684	0.32393	0.101647	0.471165	0.248882	0.349226
513	Cstf3	1.57508e-08	0.296112	6.00461	7.32451	3.489	3.81992	3.69691	6.39248	2.38585e-08	0.456494	-0.641912	-0.890972	-0.539295	-0.788354	-0.654346
514	Qser1	0.0107918	0.87843	9.57409	10.9797	8.18455	9.74683	9.16609	9.98713	0.0125024	0.921351	-0.203252	-0.383306	0.023378	-0.156676	-0.11205
515	Eif3m	0.219416	0.5665	5.10362	5.08744	5.97088	5.56538	5.71611	5.09886	0.230478	0.700286	0.191676	0.195506	0.105214	0.109043	0.139087
516	Immp1l	5.22489e-05	0.000315131	8.39918	9.27178	8.84148	6.87258	7.60447	8.6556	6.81772e-05	0.00603494	0.0663407	-0.0617396	-0.255698	-0.383779	-0.166279
517	Mpped2	7.86741e-13	0.647742	0.712688	0.628605	0	0	0	0.68798	1.46773e-12	0.762544	-0.776263	-0.703637	-0.776263	-0.703637	-0.755298
518	Lin7c	3.27033e-15	0.174337	3.51256	2.9361	6.46661	7.05927	6.83896	3.34316	8.0247e-15	0.316173	0.726507	0.923686	0.836703	1.03388	0.851917
519	Lgr4	0.712537	0.973455	2.5562	2.71778	2.2444	2.42378	2.3571	2.60368	0.719034	0.983495	-0.132386	-0.196492	-0.0547488	-0.118854	-0.102258
520	Nop10	1.55185e-17	0.063704	18.4282	17.7167	26.2912	22.921	24.1738	18.2191	5.39571e-17	0.161477	0.490287	0.544112	0.300128	0.353952	0.389383
521	Slc12a6	4.54718e-34	0.00350814	18.2777	17.3409	27.4308	32.3117	30.4973	18.0024	3.91425e-33	0.0251865	0.560525	0.632392	0.789096	0.860963	0.729047
522	Emc4	4.08621e-18	0.00571306	9.38966	11.0854	14.4009	13.5405	13.8603	9.88797	1.50944e-17	0.0338698	0.567861	0.349746	0.484924	0.266809	0.448727
523	Emc7	3.18723e-08	0.508767	6.48892	7.34449	8.05958	9.46515	8.94266	6.74034	4.77022e-08	0.652281	0.274686	0.118619	0.482764	0.326697	0.361235
524	Actc1	6.57076e-56	0.333655	53.2733	17.4403	228.579	212.016	218.173	42.7434	2.02884e-54	0.493868	2.08068	3.63806	1.97265	3.53002	2.32493
525	BC052040	0.100049	0.0982853	1.78616	1.30589	1.22769	1.3975	1.33438	1.64503	0.108049	0.215489	-0.322726	-0.0497754	-0.216748	0.056203	-0.180246
526	Fam98b	1.10105e-15	0.0468126	21.1705	20.8173	29.3758	34.8845	32.8368	21.0667	2.89961e-15	0.131109	0.45428	0.47745	0.694717	0.717887	0.616719
527	Srp14	5.36376e-30	0.0396939	25.9295	29.415	37.4078	37.2643	37.3176	26.9537	3.67739e-29	0.116998	0.512213	0.336615	0.506813	0.331214	0.454967
528	Ivd	2.07017e-07	0.216093	9.82497	9.28423	11.9386	12.6247	12.3697	9.66607	3.00442e-07	0.366257	0.257322	0.331252	0.331861	0.40579	0.325935
529	Chac1	5.32225e-19	0.23878	11.8981	13.2472	22.7928	27.682	25.8646	12.2945	2.11451e-18	0.392022	0.883374	0.739854	1.15299	1.00947	1.01487
530	Chp1	0.00279698	0.0189826	14.6475	14.3466	14.3478	16.6838	15.8155	14.5591	0.00335669	0.0716112	-0.0279026	0.00011153	0.176493	0.204507	0.112028
531	Oip5os1	6.14752e-13	3.32479e-06	41.5744	40.1332	41.0535	51.9319	47.8881	41.1509	1.15522e-12	0.000216289	-0.0177631	0.0319206	0.314151	0.363835	0.213919
532	Ndufaf1	0.0537355	0.285623	19.1212	16.236	18.7297	17.5701	18.0012	18.2734	0.059364	0.444692	-0.0283525	0.194942	-0.115734	0.107561	-0.0205212
533	Rtf1	0.0421735	0.1795	4.38265	4.34872	4.56143	5.64197	5.24031	4.37268	0.0469623	0.323062	0.0471394	0.0562645	0.303294	0.312419	0.215975
534	Mga	0.0932745	0.179211	4.05666	4.07949	3.99776	5.17302	4.73614	4.06336	0.101079	0.322747	-0.0169019	-0.0234008	0.287793	0.281294	0.179985
535	Ehd4	2.20633e-58	8.39908e-07	40.9548	39.536	67.9339	90.6313	82.194	40.5378	7.86708e-57	7.56617e-05	0.716378	0.766011	1.12701	1.17664	1.00205
536	Ganc	1.46966e-53	0.15788	0.601195	0.917829	4.47846	5.53081	5.13962	0.694241	3.95092e-52	0.296891	1.77462	1.5143	2.02811	1.76779	1.85751
537	Capn3	1.77188e-07	0.695436	5.51209	6.69755	7.08897	7.98817	7.65391	5.86045	2.57855e-07	0.797747	0.312835	0.0715571	0.464907	0.223628	0.33505
538	Zfp106	9.41058e-07	0.0500622	40.0127	43.53	39.051	47.9047	44.6135	41.0463	1.32997e-06	0.136872	-0.0342341	-0.152941	0.253903	0.135196	0.117483
539	Snap23	6.45156e-25	0.53809	2.65085	3.00587	6.16307	6.1323	6.14374	2.75518	3.41917e-24	0.677442	0.972345	0.838463	0.966134	0.832253	0.927798
540	Lrrc57	0.211916	0.289036	11.2348	11.6426	12.8869	12.0443	12.3575	11.3546	0.222902	0.448419	0.182731	0.135432	0.0924277	0.0451287	0.112598
541	Haus2	3.04169e-22	0.627546	0.183457	0.421578	1.55718	1.66342	1.62392	0.253431	1.43132e-21	0.747547	1.11154	0.847059	1.17027	0.905785	1.06584
542	Ccndbp1	1.16138e-10	0.224051	5.47361	6.13779	8.17583	7.97096	8.04712	5.66878	1.91362e-10	0.374973	0.503269	0.362361	0.470692	0.329785	0.440034
543	Adal	0.00931617	0.499905	0.257767	0.510295	0.518835	0.636315	0.592644	0.331975	0.0108415	0.644995	0.272101	0.00813461	0.379586	0.115619	0.257857
544	Map1a	2.94017e-34	0.776199	0.411276	1.26432	5.27189	5.90491	5.6696	0.66195	2.55414e-33	0.853408	2.1519	1.46983	2.29062	1.60855	2.00472
545	Ppip5k1	7.44986e-05	0.1933	7.79459	7.08851	5.65252	6.00093	5.87142	7.5871	9.65592e-05	0.339651	-0.402715	-0.281974	-0.329069	-0.208328	-0.321563
546	Serf2	5.27536e-18	0.226552	75.236	76.7577	90.8576	88.6535	89.4728	75.6832	1.92699e-17	0.377454	0.268927	0.240413	0.233888	0.205374	0.238575
547	Hypk	1.57589e-17	0.563627	7.99122	8.10876	11.5252	11.2131	11.3291	8.02576	5.47038e-17	0.698734	0.478245	0.459507	0.441836	0.423098	0.449946
548	Mfap1b	3.36925e-14	0.597789	3.31395	3.4919	5.89251	6.45746	6.24745	3.36624	7.16206e-14	0.723425	0.676019	0.617703	0.789674	0.731358	0.731081
549	Mfap1a	0.0683546	0.772593	3.22698	3.32623	4.2141	4.10739	4.14705	3.25615	0.0748834	0.851091	0.302788	0.269306	0.272957	0.239474	0.274198
550	Eif3j1	0.583941	0.533435	10.0926	10.366	9.31702	10.2486	9.90234	10.173	0.592422	0.673371	-0.104576	-0.139696	0.0201497	-0.0149706	-0.0353742
551	B2m	8.36432e-56	0.0080955	24.5562	26.7364	62.2452	79.0369	72.7949	25.1969	2.57331e-54	0.0421184	1.30728	1.18917	1.64699	1.52888	1.49413
552	Sord	2.76591e-23	0.430579	5.26884	5.10197	1.83799	2.15358	2.03627	5.2198	1.357e-22	0.586446	-1.14333	-1.10441	-0.991209	-0.952286	-1.03457
553	Slc30a4	4.17897e-10	0.76849	4.1061	4.23265	6.47623	6.83207	6.69979	4.14329	6.70429e-10	0.848832	0.550088	0.514769	0.617171	0.581851	0.582128
554	Bloc1s6	8.74273e-39	0.426928	2.61898	2.71993	6.63635	7.23121	7.01008	2.64865	1.02062e-37	0.582591	1.0773	1.03761	1.18552	1.14583	1.13446
555	Sqor	0.0803778	0.118622	2.12636	2.98329	2.20751	2.30918	2.27139	2.37818	0.0874814	0.245673	0.0369679	-0.312508	0.0819907	-0.267485	-0.0463426
556	Sema6d	9.72374e-25	0.359008	0.362959	0.626928	2.65836	2.55506	2.59346	0.440529	5.10571e-24	0.519599	1.42446	1.16905	1.38313	1.12772	1.31878
557	Eid1	2.95119e-29	0.00322069	16.9944	14.5004	26.0542	29.7728	28.3905	16.2615	1.94209e-28	0.024055	0.588303	0.803544	0.774108	0.989348	0.76779
558	Secisbp2l	4.45756e-17	0.0135955	8.80032	7.96934	12.2887	14.4643	13.6556	8.55613	1.47352e-16	0.0579735	0.439301	0.567128	0.658041	0.785868	0.616951
559	Cops2	0.00771337	0.0087343	10.2794	11.5327	10.4413	9.10768	9.60343	10.6477	0.00901321	0.0440175	0.0205546	-0.131442	-0.158244	-0.31024	-0.135516
560	Usp50	0.213552	0.0652231	20.205	21.9817	21.774	20.9234	21.2396	20.7271	0.22454	0.164107	0.102983	-0.0130999	0.0480643	-0.0680183	0.0336322
561	Sppl2a	1.46188e-06	0.135717	35.9256	39.2774	30.0175	28.7699	29.2337	36.9105	2.05038e-06	0.26866	-0.251538	-0.376886	-0.310768	-0.436116	-0.326443
562	Blvra	2.91074e-07	0.208256	0.268145	0.331768	0.732027	1.13804	0.987117	0.286841	4.19362e-07	0.356804	0.449742	0.379119	0.753573	0.682949	0.626843
563	Snrnp200	4.91597e-08	0.0759366	4.71924	5.0918	5.54798	7.17617	6.57093	4.82872	7.31387e-08	0.181524	0.195226	0.104181	0.515603	0.424558	0.377291
564	Ciao1	2.94479e-14	0.818733	0.397158	0.682651	1.47168	1.82943	1.69645	0.481053	6.30541e-14	0.882748	0.822996	0.554755	1.01802	0.749776	0.864436
565	Tmem127	1.38841e-27	0.708934	0.296758	0.491165	2.36246	2.70209	2.57584	0.353886	8.32653e-27	0.807319	1.37461	1.17308	1.51343	1.3119	1.40118
566	Stard7	7.64491e-08	0.0201018	19.0822	16.2484	21.9929	23.1449	22.7167	18.2495	1.12775e-07	0.0743523	0.195266	0.414728	0.265798	0.48526	0.301081
567	Mrps5	0.739462	0.809072	5.78496	6.09161	5.69821	6.19106	6.00785	5.87507	0.744793	0.87564	-0.0185637	-0.0823363	0.0838639	0.0200913	0.0275982
568	Nphp1	2.25652e-15	0.323584	0.315997	0.633342	1.62364	1.64381	1.63631	0.409252	5.6659e-15	0.484609	0.995417	0.683746	1.00646	0.694791	0.903593
569	Mtln	1.22178e-06	0.152848	16.9913	18.4556	21.3704	20.7982	21.0109	17.4216	1.7207e-06	0.290363	0.314294	0.201407	0.276913	0.164026	0.256823
570	Snrpb	2.15729e-18	0.442217	13.5918	14.1876	18.7824	20.4121	19.8063	13.7669	8.17448e-18	0.597171	0.439061	0.381317	0.553269	0.495525	0.494653
571	Nop56	3.59902e-10	0.207793	0.425934	0.737043	1.49083	2.45497	2.09657	0.517356	5.78477e-10	0.356372	0.804721	0.519995	1.27677	0.99204	1.02911
572	Idh3b	7.10887e-06	0.00970864	110.954	111.936	109.214	95.133	100.367	111.242	9.64525e-06	0.0469297	-0.0225983	-0.0351945	-0.2198	-0.232397	-0.147025
573	Mrps26	0.0578585	0.565866	2.60806	3.09567	1.90583	2.70849	2.41012	2.75135	0.0637949	0.700009	-0.312273	-0.495149	0.0396076	-0.143269	-0.137588
574	Ddrgk1	0.0206639	0.00229251	9.11588	7.96824	7.98046	9.59939	8.99759	8.77863	0.0235425	0.0195564	-0.17176	0.00196363	0.0673597	0.241084	0.0319471
575	Itpa	3.66141e-20	0.047511	2.68632	3.53265	6.51915	5.99383	6.18911	2.93502	1.55237e-19	0.132273	1.02839	0.730215	0.923901	0.625729	0.869441
576	Atrn	7.10741e-06	0.534965	1.14179	1.54996	2.21583	2.35187	2.3013	1.26173	9.6448e-06	0.674804	0.586372	0.334716	0.646147	0.394491	0.545603
577	Hspa12b	3.0268e-14	0.594393	0.228915	0.538251	1.01821	1.4677	1.30061	0.319816	6.47449e-14	0.720646	0.715689	0.391784	1.00578	0.681876	0.801679
578	Cenpb	0.00443233	0.00292717	45.8507	43.4338	37.5392	45.9389	42.8165	45.1405	0.00526297	0.0225342	-0.281745	-0.205332	0.0027146	0.0791274	-0.0745581
579	Mavs	4.11037e-12	0.496055	6.71124	7.39948	3.71535	3.80928	3.77436	6.91348	7.32815e-12	0.641971	-0.709598	-0.832935	-0.681141	-0.804478	-0.729004
580	Smox	1.65584e-20	0.155472	49.5987	61.832	28.881	34.474	32.3949	53.1936	7.16662e-20	0.293597	-0.759872	-1.07227	-0.51234	-0.824738	-0.698494
581	Prnp	1.76242e-21	0.00398868	4.91647	7.10954	8.74822	8.86293	8.82029	5.56092	8.01886e-21	0.0270634	0.720402	0.265518	0.737281	0.282397	0.581867
582	Tmem230	0.0602618	0.834066	2.37696	2.53389	3.03183	3.3229	3.2147	2.42307	0.066316	0.893178	0.255712	0.19018	0.356274	0.290742	0.300138
583	Pcna	2.13542e-19	0.782906	2.52644	2.90871	5.78906	6.37922	6.15984	2.63877	8.68226e-19	0.857244	0.944999	0.796521	1.06525	0.916776	0.976474
584	Gpcpd1	1.32359e-46	0.596541	42.3827	47.6536	21.3784	25.2712	23.8241	43.9316	2.3847e-45	0.722223	-0.955015	-1.12044	-0.723641	-0.889066	-0.855989
585	Mkks	0.00244415	0.0178404	8.56103	8.29194	9.96261	7.77672	8.58928	8.48195	0.00294361	0.0689504	0.197354	0.238539	-0.123483	-0.0822982	0.0162376
586	AL731706.1	0.00406598	0.062504	0.363433	0.653376	0.872442	0.730819	0.783464	0.448635	0.00483605	0.159814	0.457677	0.179506	0.344211	0.06604	0.299988
587	Ndufaf5	1.6728e-10	0.00451096	6.80237	7.53432	10.4799	8.90283	9.48907	7.01746	2.73567e-10	0.0292137	0.557127	0.427763	0.343929	0.214566	0.38767
588	Kif16b	0.000744744	0.844128	0.300102	0.386043	0.682659	0.814203	0.765304	0.325356	0.000922084	0.89932	0.372118	0.279771	0.480711	0.388364	0.413536
589	Snrpb2	1.2404e-06	0.99285	6.07202	5.22666	8.31356	7.461	7.77792	5.8236	1.74635e-06	0.99645	0.397211	0.580873	0.258707	0.44237	0.363346
590	Rrbp1	3.08088e-47	6.35503e-06	4.49487	4.29595	12.1526	19.5769	16.8171	4.43641	5.7831e-46	0.00036105	1.25919	1.31239	1.90487	1.95807	1.71254
591	Snx5	8.8362e-22	0.0731844	15.0147	17.5421	20.8588	26.9268	24.6711	15.7574	4.06599e-21	0.177181	0.448821	0.237407	0.802255	0.590841	0.61535
592	Kat14	0.0148657	0.949038	0.366472	0.546609	0.642222	0.838604	0.765604	0.419407	0.017085	0.966735	0.265193	0.0865409	0.428155	0.249503	0.314873
593	Sec23b	2.15246e-28	0.969	0.29421	0.479088	2.78509	2.95304	2.89061	0.348538	1.34778e-27	0.980855	1.54826	1.35562	1.61089	1.41826	1.5286
594	Smim26	0.0460408	0.370102	2.94664	3.35153	2.4069	2.27932	2.32675	3.06562	0.0511618	0.530799	-0.212166	-0.353065	-0.267228	-0.408126	-0.289364
595	Dtd1	2.80692e-05	0.028237	0.83965	1.33279	1.83472	1.58329	1.67675	0.984563	3.70919e-05	0.0928019	0.623773	0.281149	0.489781	0.147156	0.431663
596	Rin2	2.3895e-29	0.36317	0.206388	0.477354	3.3512	4.17584	3.86929	0.286014	1.57855e-28	0.523855	1.85072	1.5584	2.1011	1.80878	1.92081
597	Naa20	6.11093e-19	0.586267	8.63107	8.35096	3.41876	3.71858	3.60713	8.54876	2.41995e-18	0.714657	-1.12406	-1.08147	-1.02934	-0.986761	-1.05145
598	Kiz	0.00832097	0.0460911	8.50574	6.98232	9.015	9.66557	9.42373	8.05807	0.00970723	0.129676	0.0752912	0.327281	0.16609	0.41808	0.202597
599	Cd93	7.1536e-39	0.000466928	7.5358	7.3725	16.4942	23.3502	20.8016	7.48781	8.38555e-38	0.00769664	1.03527	1.06314	1.51234	1.5402	1.36097
600	Cst3	5.76427e-70	3.9054e-07	44.2515	56.501	98.8035	88.4178	92.2785	47.8511	4.72338e-68	4.32232e-05	1.14113	0.795505	0.982598	0.636977	0.933153
601	Apmap	0.549764	0.717501	1.54919	1.69251	1.93877	1.90223	1.91581	1.59131	0.55888	0.813321	0.205172	0.126257	0.187122	0.108208	0.170217
602	Acss1	3.77578e-11	0.342955	41.583	36.9783	10.5344	13.5782	12.4467	40.2298	6.3629e-11	0.50278	-1.88433	-1.71923	-1.54647	-1.38137	-1.61643
603	Abhd12	3.17614e-22	0.0013985	5.81495	5.57443	8.79539	12.0526	10.8418	5.74427	1.4913e-21	0.0153103	0.5234	0.575237	0.937557	0.989394	0.812151
604	Nsfl1c	2.01273e-07	0.470996	8.27351	8.63895	11.813	11.3598	11.5283	8.3809	2.92256e-07	0.62172	0.466424	0.410664	0.414464	0.358704	0.417388
605	Fkbp1a	1.06343e-46	0.0969455	58.0518	65.6803	80.4144	94.5229	89.2784	60.2935	1.93612e-45	0.213978	0.463304	0.288024	0.693866	0.518586	0.558647
606	Psmf1	0.0093694	0.685828	1.43936	1.92835	1.57108	2.23093	1.98565	1.58306	0.0109005	0.790669	0.0758696	-0.187717	0.405449	0.141862	0.208965
607	Csnk2a1	7.58922e-11	0.0604381	36.1063	35.4039	43.5578	49.4508	47.2602	35.8999	1.26097e-10	0.156646	0.264015	0.291585	0.443213	0.470782	0.387217
608	Tbc1d20	0.000292421	0.135831	0.38169	0.456821	0.561723	1.04201	0.863475	0.403768	0.000369352	0.268761	0.176705	0.100316	0.563557	0.487167	0.408691
609	Rbck1	4.77766e-21	0.354594	0.322105	0.547402	1.81663	2.38606	2.17438	0.388311	2.1328e-20	0.515498	1.09113	0.864119	1.35677	1.12976	1.19315
610	H13	2.20656e-77	0.046816	0.417955	0.641192	5.53345	6.8087	6.33465	0.483555	2.93818e-75	0.131109	2.20403	1.9931	2.46127	2.25034	2.30567
611	Mcts2	3.37759e-16	0.00958327	0.322886	0.840496	1.97945	1.66246	1.78029	0.474991	9.70458e-16	0.0466411	1.17136	0.69495	1.00907	0.532665	0.914531
612	Id1	0.00174854	0.000283912	23.6144	20.7273	18.8654	25.6296	23.1151	22.766	0.00212175	0.00569294	-0.309248	-0.129254	0.113527	0.293521	0.02104
613	Cox4i2	0.000132637	0.863631	0.351332	0.380077	0	0	0	0.359779	0.000170256	0.912509	-0.434382	-0.464748	-0.434382	-0.464748	-0.443372
614	Tpx2	2.06312e-24	0.168904	0.394171	1.43744	3.33256	5.47473	4.67842	0.700744	1.06493e-23	0.310015	1.63581	0.829855	2.21541	1.40945	1.73932
615	Mylk2	1.1312e-17	0.370568	22.0848	29.3573	23.5016	32.6201	29.2305	24.2219	3.99838e-17	0.53102	0.0859374	-0.309165	0.542384	0.147282	0.261331
616	Pdrg1	3.15897e-11	0.152726	35.1241	37.4422	45.2395	43.9463	44.427	35.8053	5.3446e-11	0.290325	0.356166	0.266434	0.315242	0.22551	0.303638
617	Tm9sf4	0.000112212	0.309715	1.50204	1.3957	2.31925	2.75649	2.59395	1.47079	0.000144539	0.470563	0.407753	0.470409	0.58628	0.648936	0.540599
618	Mapre1	1.36834e-27	0.000217505	17.492	17.2168	23.8157	31.5469	28.673	17.4111	8.212e-27	0.00478961	0.424358	0.44599	0.815621	0.837253	0.688576
619	Snta1	9.13338e-05	0.081064	57.0956	61.923	46.1485	58.9184	54.1715	58.5142	0.000118003	0.190049	-0.301217	-0.416374	0.0445701	-0.070587	-0.109311
620	Pxmp4	0.122683	0.0442757	9.4778	8.39115	8.36042	8.9343	8.72097	9.15848	0.131543	0.126404	-0.16269	-0.00472861	-0.0768456	0.0811159	-0.0635115
621	Chmp4b	5.75941e-08	0.474631	66.3493	73.9463	71.455	76.8714	74.858	68.5817	8.54636e-08	0.624645	0.105424	-0.0487712	0.209431	0.0552362	0.124592
622	Eif2s2	0.107464	0.158444	33.2345	33.6974	32.0339	36.6601	34.9404	33.3705	0.115779	0.29742	-0.0515051	-0.0708799	0.137586	0.118212	0.0644354
623	Itch	1.45531e-24	0.21363	2.43368	2.48345	5.19795	6.0126	5.70977	2.44831	7.58076e-24	0.363239	0.852035	0.831277	1.03019	1.00943	0.960376
624	Dynlrb1	2.68096e-12	0.154292	52.1385	56.6193	68.8097	67.5056	67.9904	53.4552	4.83129e-12	0.292196	0.393671	0.276875	0.366465	0.249669	0.341325
625	Map1lc3a	4.9145e-65	0.424282	44.4135	45.1135	91.01	95.7106	93.9633	44.6192	2.75535e-63	0.579913	1.01867	0.996602	1.09055	1.06849	1.05773
626	Trp53inp2	0.308926	0.0622792	39.0568	37.406	37.1567	39.6048	38.6947	38.5717	0.320353	0.159382	-0.0701114	-0.00939705	0.0196017	0.080316	0.00447871
627	Acss2	0.0287383	0.394354	1.56108	1.4393	0.842512	1.0625	0.980727	1.5253	0.0324424	0.553137	-0.47508	-0.404792	-0.312357	-0.242069	-0.350422
628	Trpc4ap	0.919579	0.738177	15.5086	15.5475	15.5237	16.0298	15.8417	15.5201	0.920768	0.827839	0.00131291	-0.0020805	0.044842	0.0414486	0.027816
629	Eif6	1.15525e-05	0.71856	8.43875	10.3478	9.95471	11.4874	10.9177	8.99974	1.5521e-05	0.814088	0.214884	-0.0508631	0.403808	0.138062	0.253139
630	Uqcc1	0.00147023	0.324755	9.98508	9.423	7.83672	8.22574	8.08113	9.81991	0.00179042	0.485771	-0.313963	-0.238188	-0.251809	-0.176034	-0.252745
631	Ergic3	6.18311e-22	0.825633	12.9495	14.6384	20.0871	22.1305	21.3709	13.4458	2.8684e-21	0.887829	0.596141	0.431263	0.729581	0.564703	0.630971
632	Nfs1	0.0522272	0.897791	5.88822	6.17726	6.70349	7.0932	6.94833	5.97315	0.0578026	0.935327	0.161382	0.10208	0.232579	0.173277	0.188841
633	Romo1	9.41741e-28	0.0711432	29.1618	30.8371	42.7086	40.6567	41.4194	29.6541	5.71211e-27	0.173571	0.535194	0.45721	0.465825	0.387841	0.468646
634	Rbm39	7.09063e-22	0.0440609	6.06633	6.73398	9.2453	11.9166	10.9236	6.26253	3.28048e-21	0.126064	0.535928	0.405679	0.87019	0.739941	0.715275
635	Phf20	1.41254e-05	0.0749179	0.375944	0.317483	0.66759	1.07784	0.925338	0.358764	1.89004e-05	0.179441	0.277343	0.33998	0.594662	0.657299	0.502816
636	Scand1	9.66159e-06	0.00664008	7.01443	6.78755	7.1739	9.21546	8.45656	6.94776	1.30217e-05	0.0369368	0.0284244	0.0698552	0.350083	0.391513	0.250767
637	2900097C17Rik	0.000996184	0.807705	11.4401	12.4203	12.1538	13.3306	12.8932	11.7281	0.00122556	0.874398	0.0804784	-0.0289368	0.204106	0.0946906	0.126355
638	Epb41l1	4.28841e-13	0.00811176	0.279043	0.350216	0.964799	2.18651	1.73237	0.299958	8.16849e-13	0.042156	0.619317	0.541191	1.31691	1.23879	1.07169
639	Dlgap4	8.21683e-57	0.000139726	3.48479	3.96317	8.99219	13.0304	11.5293	3.62537	2.67267e-55	0.00347156	1.15576	1.00954	1.64544	1.49922	1.43766
640	Myl9	2.69908e-08	0.0790578	3.49019	2.92883	1.77203	2.06212	1.95429	3.32523	4.05099e-08	0.186681	-0.695835	-0.503158	-0.552244	-0.359568	-0.549967
641	Rab5if	0.0180397	0.0462386	19.8835	20.6985	22.8584	20.9335	21.649	20.123	0.0206299	0.129903	0.192132	0.1369	0.0707691	0.0155367	0.100632
642	Ndrg3	0.654702	0.947459	0.777783	0.942766	0.644432	0.790444	0.736168	0.826265	0.662397	0.965588	-0.11249	-0.240523	0.0102386	-0.117794	-0.0729897
643	Samhd1	6.07171e-28	0.000167492	2.88715	2.68532	5.92037	9.59251	8.22748	2.82784	3.72252e-27	0.00396491	0.832138	0.909062	1.44626	1.52318	1.26941
644	Rpn2	3.47501e-45	0.360171	2.3314	3.7154	7.68153	9.83554	9.03483	2.7381	5.84103e-44	0.520763	1.38182	0.880571	1.70157	1.20032	1.42464
645	Blcap	0.48974	0.941291	1.4795	1.61617	1.14781	1.31497	1.25283	1.51966	0.500247	0.961947	-0.207182	-0.284589	-0.0990564	-0.176464	-0.161491
646	Tti1	0.137579	0.7748	6.08566	6.67033	6.8425	7.18861	7.05995	6.25747	0.146904	0.85253	0.146411	0.0320248	0.208717	0.09433	0.151304
647	Rprd1b	0.293726	0.575061	3.31265	3.73259	2.77129	3.57345	3.27526	3.43605	0.305223	0.707499	-0.193516	-0.327571	0.084707	-0.0493479	-0.0532636
648	Tgm2	1.27797e-10	0.00600143	19.4519	19.8308	21.3531	27.1043	24.9664	19.5632	2.10167e-10	0.0347211	0.128239	0.101757	0.458557	0.432074	0.33658
649	Ralgapb	0.0718956	0.292087	4.98248	4.68632	5.43403	5.91604	5.73686	4.89545	0.0786716	0.45171	0.104977	0.178226	0.209202	0.282452	0.192474
650	Mafb	2.66073e-21	7.54154e-05	4.76339	3.67673	7.48463	11.161	9.7944	4.44407	1.20036e-20	0.00220829	0.557933	0.85935	1.07727	1.37869	0.987526
651	Top1	0.0943358	0.0492773	6.17878	5.75524	5.76418	7.06437	6.58105	6.05432	0.102177	0.13543	-0.0858235	0.00190763	0.167823	0.255554	0.103891
652	Chd6	1.26105e-05	0.390492	0.406166	0.56257	0.879829	1.30704	1.14824	0.452127	1.69186e-05	0.550591	0.418835	0.26668	0.714279	0.562124	0.564985
653	Srsf6	2.84331e-47	4.82744e-08	7.9946	7.3153	13.3454	20.2407	17.6775	7.79498	5.34894e-46	9.34986e-06	0.673453	0.786744	1.2397	1.35299	1.08655
654	Jph2	1.01919e-58	5.40755e-06	27.4027	28.617	40.2076	52.1517	47.7117	27.7595	3.74376e-57	0.000317815	0.53688	0.476486	0.904086	0.843692	0.760229
655	Fitm2	1.62779e-07	0.00939424	11.6611	10.7587	7.53644	9.42421	8.72247	11.3959	2.37128e-07	0.0461162	-0.568696	-0.462028	-0.280463	-0.173796	-0.350471
656	Serinc3	4.43146e-15	0.398124	33.1158	37.8597	43.116	45.6306	44.6959	34.5099	1.06831e-14	0.556818	0.370862	0.18303	0.450835	0.263004	0.363844
657	Pkig	0.000108865	0.190273	15.6119	14.6971	17.923	19.0925	18.6578	15.3431	0.000140313	0.335716	0.187924	0.26964	0.274443	0.35616	0.266421
658	Ywhab	1.59174e-53	4.2049e-05	30.3241	33.2019	53.3318	74.4074	66.573	31.1698	4.25229e-52	0.00147466	0.794524	0.667723	1.26743	1.14063	1.07074
659	Stk4	3.10251e-47	0.0773897	0.580613	0.930193	4.94178	6.47178	5.90303	0.68334	5.8109e-46	0.184222	1.91041	1.62215	2.24097	1.95271	2.0359
660	Sdc4	1.12524e-12	0.0316558	1.42329	1.84088	2.52884	4.38156	3.69285	1.546	2.07606e-12	0.100249	0.542227	0.31286	1.15106	0.921688	0.882231
661	Sys1	0.102258	0.144016	2.68709	3.3974	2.5435	2.4799	2.50354	2.89583	0.110393	0.280192	-0.0573096	-0.311476	-0.0834381	-0.337605	-0.153115
662	Dbndd2	0.00148678	0.422017	7.81277	7.96855	6.33168	7.00284	6.75335	7.85855	0.00180979	0.57839	-0.265453	-0.290732	-0.139084	-0.164363	-0.192251
663	Ube2c	0.0465617	0.45558	12.1609	12.5171	8.94047	10.7041	10.0485	12.2655	0.0517271	0.608249	-0.404868	-0.4434	-0.169239	-0.207771	-0.263832
664	Tnnc2	1.5717e-06	0.0193031	11659.4	12456.2	10744	9821.27	10164.3	11893.5	2.20044e-06	0.0724037	-0.117951	-0.213315	-0.247484	-0.342848	-0.226648
665	Ctsa	2.85402e-66	1.88269e-05	7.83637	7.65224	23.7215	33.4613	29.8407	7.78226	1.74978e-64	0.000862598	1.48424	1.51462	1.96345	1.99383	1.81217
666	Pltp	9.59342e-38	0.00160184	1.85326	1.66025	11.092	17.1815	14.9179	1.79654	1.0468e-36	0.0164469	2.08337	2.18442	2.67179	2.77284	2.50893
667	Pcif1	0.000825367	0.827714	9.53653	10.8948	10.7249	12.3398	11.7395	9.93567	0.00101983	0.889057	0.154177	-0.020756	0.340341	0.165408	0.220269
668	Ncoa5	4.02043e-06	0.172845	1.3545	1.50337	2.05917	2.9383	2.6115	1.39825	5.52436e-06	0.314429	0.377716	0.28927	0.74215	0.653703	0.590618
669	Slc35c2	0.0183536	0.020502	12.1546	11.8671	11.0184	13.8735	12.8122	12.0701	0.0209692	0.075294	-0.130323	-0.098448	0.177185	0.20906	0.0796731
670	Zmynd8	1.62165e-28	1.88655e-06	3.68213	3.06385	5.66625	9.02727	7.77789	3.50044	1.02368e-27	0.000142274	0.509711	0.714027	1.09869	1.30301	0.963807
671	Ncoa3	7.22616e-06	0.0801059	0.362959	0.504439	0.570607	1.2364	0.988909	0.404534	9.79503e-06	0.188478	0.20458	0.0620966	0.714439	0.571955	0.501886
672	Arfgef2	0.766073	0.326396	1.82688	1.53473	1.53584	1.72973	1.65766	1.74103	0.771049	0.48705	-0.156749	0.000626412	-0.0504498	0.106926	-0.0445633
673	Cse1l	0.0742436	0.275197	2.58299	3.07019	3.51797	3.33472	3.40284	2.72616	0.0810639	0.43278	0.334508	0.150578	0.274772	0.0908419	0.240743
674	Stau1	5.23242e-22	0.645937	0.369662	0.387772	1.91059	2.07824	2.01592	0.374984	2.43665e-21	0.76126	1.08749	1.06854	1.16829	1.14934	1.13318
675	Kcnb1	0.000126038	0.378724	3.02163	3.09333	1.65093	2.1781	1.98214	3.0427	0.000161933	0.539172	-0.601285	-0.62678	-0.339616	-0.365111	-0.438974
676	Rnf114	2.93502e-25	0.00619549	7.97032	6.59165	2.30819	3.32355	2.94611	7.56518	1.58808e-24	0.0356021	-1.43912	-1.19837	-1.05294	-0.812199	-1.11805
677	Ube2v1	0.0487021	0.10281	8.41327	8.37106	8.31707	9.23095	8.89124	8.40087	0.0540416	0.222882	-0.0148202	-0.0083353	0.120172	0.126657	0.073357
678	Cebpb	5.85516e-06	0.201612	17.6223	14.6286	6.94276	8.61213	7.99158	16.7426	7.97469e-06	0.34953	-1.22932	-0.976472	-0.954105	-0.701256	-0.980569
679	Dpm1	0.00417851	0.00289235	7.46888	8.90259	7.86329	7.51516	7.64457	7.89019	0.00496642	0.0224531	0.0656703	-0.159965	0.0078619	-0.217773	-0.0404208
680	Sall4	1.10194e-06	0.0555997	0.369898	0.778561	0	0	0	0.489988	1.55424e-06	0.148208	-0.454068	-0.830711	-0.454068	-0.830711	-0.5753
681	Tshz2	5.1514e-10	0.156484	1.64588	1.61696	3.18817	4.11973	3.77344	1.63738	8.22872e-10	0.295165	0.66257	0.678424	0.95232	0.968174	0.855923
682	Dok5	1.15354e-07	0.0218228	0.230912	0.54269	0	0	0	0.322531	1.68908e-07	0.0786358	-0.299727	-0.625448	-0.299727	-0.625448	-0.403301
683	Fam210b	0.000651045	0.702379	1.32389	1.50161	1.99078	2.33794	2.20889	1.37612	0.000808541	0.802799	0.36398	0.257667	0.522414	0.416101	0.43347
684	Aurka	2.52178e-09	0.117166	4.02134	4.75866	5.37775	7.58065	6.76177	4.23801	3.92954e-09	0.243951	0.344974	0.147314	0.773014	0.575355	0.567367
685	Cstf1	4.04229e-05	0.163292	1.79031	1.98312	2.38368	3.41308	3.03042	1.84697	5.29975e-05	0.303109	0.278165	0.181771	0.661358	0.564965	0.501503
686	Rbm38	5.89097e-14	0.29428	7.01743	6.90828	3.14353	3.93858	3.64303	6.98535	1.21792e-13	0.454568	-0.95228	-0.932504	-0.699044	-0.679268	-0.782288
687	Pmepa1	2.5563e-28	0.0268292	6.11748	7.53773	10.4434	14.5641	13.0323	6.53484	1.59713e-27	0.0895918	0.685079	0.422593	1.12878	0.866298	0.897107
688	Rab22a	2.91117e-05	0.47452	5.84978	5.82221	3.91729	4.39966	4.22035	5.84168	3.84457e-05	0.624645	-0.478193	-0.472375	-0.343189	-0.337371	-0.390203
689	Vapb	7.25532e-13	2.54584e-06	20.1382	18.7537	20.0941	26.4644	24.0964	19.7313	1.35503e-12	0.000173565	-0.00301385	0.0947169	0.377714	0.475445	0.275668
690	Stx16	5.64762e-24	0.048162	0.276492	0.471796	1.8167	2.84807	2.46468	0.333884	2.8378e-23	0.133556	1.14182	0.936431	1.59195	1.38656	1.37709
691	Npepl1	0.000137896	0.474677	14.5629	15.4423	11.6318	13.3327	12.7004	14.8213	0.000176768	0.624645	-0.301048	-0.380352	-0.118795	-0.198099	-0.207645
692	Gnas	8.26104e-81	0.163225	172.689	187.058	257.143	283.427	273.656	176.911	1.3804e-78	0.303109	0.571668	0.456995	0.711553	0.59688	0.62647
693	Nelfcd	1.70649e-48	0.0139106	0.382302	0.66098	3.70347	5.3172	4.71733	0.464194	3.43799e-47	0.0587152	1.76665	1.50169	2.19221	1.92725	1.96524
694	Ctsz	4.47155e-45	0.00273735	1.441	2.1927	10.7084	16.6681	14.4527	1.66189	7.44268e-44	0.0217002	2.262	1.8747	2.8556	2.4683	2.53734
695	Atp5e	7.06544e-06	0.215256	500.805	465.45	543.829	484.02	506.253	490.416	9.58937e-06	0.365275	0.118678	0.22408	-0.0490817	0.0563209	0.0457613
696	Prelid3b	0.00272575	0.556088	10.4066	10.6799	12.4384	12.1243	12.241	10.4869	0.00327351	0.692178	0.236485	0.202332	0.202367	0.168213	0.205024
697	Lsm14b	0.0639499	0.565954	1.03659	1.04918	1.30828	1.50839	1.434	1.04029	0.0702567	0.700009	0.180661	0.171769	0.300606	0.291714	0.254556
698	Psma7	0.0525683	0.82008	11.9996	13.5519	12.7233	13.9801	13.5129	12.4557	0.0581651	0.883642	0.0781642	-0.0845723	0.204579	0.0418421	0.109115
699	Osbpl2	7.00614e-07	0.632927	3.47574	3.47859	4.87624	5.16249	5.05608	3.47658	9.95603e-07	0.751435	0.392767	0.39185	0.461386	0.460469	0.435988
700	Adrm1	0.000180063	0.00201017	7.39464	7.42623	6.24631	8.68656	7.77945	7.40392	0.000229681	0.018332	-0.212222	-0.217641	0.206517	0.201098	0.0630684
701	B230312C02Rik	2.34768e-10	0.0606388	1.47641	3.5626	3.51381	4.24844	3.97536	2.08946	3.80867e-10	0.15688	0.866094	-0.0155113	1.08364	0.202033	0.687447
702	Mir133a-2	1.66282e-07	0.193652	0.472063	0.740684	0	0	0	0.551	2.4219e-07	0.339988	-0.55784	-0.799655	-0.55784	-0.799655	-0.633199
703	Gid8	1.44026e-05	0.613081	3.94961	4.04694	5.19074	5.60532	5.45121	3.97821	1.92683e-05	0.736375	0.322796	0.294703	0.416314	0.38822	0.373942
704	Ythdf1	1.6797e-20	0.00160818	18.9915	20.6522	21.8688	29.0195	26.3614	19.4795	7.26619e-20	0.0164722	0.193993	0.0788699	0.586512	0.471389	0.41796
705	Arfgap1	0.333281	0.149488	2.63905	2.50867	2.28658	3.06681	2.77678	2.60074	0.34498	0.286407	-0.146978	-0.0943384	0.160335	0.212975	0.0688628
706	Eef1a2	1.26857e-13	7.90675e-07	195.72	181.917	130.964	175.124	158.709	191.664	2.53715e-13	7.2453e-05	-0.575998	-0.471045	-0.159551	-0.054598	-0.270644
707	Ppdpf	4.26516e-08	0.110837	7.11909	8.40021	9.71646	9.7019	9.70732	7.49556	6.36005e-08	0.234282	0.400439	0.189063	0.398478	0.187102	0.333816
708	Gmeb2	4.65057e-20	0.182766	0.489747	0.721624	2.32015	3.22138	2.88637	0.557887	1.96296e-19	0.326534	1.15618	0.947478	1.50265	1.29394	1.31883
709	Arfrp1	0.0175018	0.505179	2.44228	3.44232	2.13672	2.77402	2.53712	2.73615	0.0200418	0.649342	-0.134111	-0.502057	0.132737	-0.235209	-0.0789792
710	Zbtb46	0.0800027	0.0323087	2.09152	1.70882	1.29293	1.89689	1.67238	1.97906	0.0870955	0.101579	-0.431125	-0.240474	-0.0938102	0.0968413	-0.156731
711	Tpd52l2	0.240234	0.486782	2.62379	3.05831	3.26037	3.26837	3.2654	2.75148	0.251461	0.634888	0.233479	0.0700996	0.236185	0.0728056	0.18522
712	Dnajc5	5.3908e-13	0.102848	5.40917	6.84194	6.40454	9.17738	8.14664	5.8302	1.01796e-12	0.222902	0.208271	-0.0828006	0.667156	0.376085	0.421313
713	Uckl1os	0.499033	0.875412	1.69905	1.96103	1.96289	2.14494	2.07727	1.77603	0.509312	0.918978	0.134556	0.00090819	0.220581	0.0869334	0.148625
714	Zfp512b	0.00754691	0.130582	1.38925	1.36353	1.57113	2.24519	1.99462	1.38169	0.00882354	0.261287	0.105842	0.121455	0.441745	0.457358	0.330386
715	Prpf6	0.00670993	0.607561	3.42943	3.53051	2.0926	2.54339	2.37582	3.45913	0.00787848	0.731821	-0.5183	-0.550851	-0.32199	-0.354542	-0.401525
716	Samd10	0.000163503	0.35853	5.12794	5.21336	3.20032	3.95829	3.67653	5.15304	0.00020887	0.519183	-0.544903	-0.564873	-0.305559	-0.32553	-0.39586
717	Pcmtd2	0.0288478	0.883777	5.59412	5.17841	6.72643	6.42607	6.53772	5.47196	0.0325617	0.924911	0.228621	0.322566	0.17142	0.265364	0.219926
718	Polr3k	2.22798e-05	0.136219	4.72096	5.53355	7.02942	6.62405	6.77474	4.95974	2.95469e-05	0.269375	0.48904	0.29743	0.414302	0.222692	0.383544
719	Plp2	2.60675e-73	0.0216738	1.22995	1.89106	10.5712	13.644	12.5018	1.42422	2.5244e-71	0.0782312	2.37546	2.00087	2.71523	2.34064	2.47755
720	Magix	1.16776e-08	0.624687	12.2551	11.5168	8.44792	8.30826	8.36018	12.0381	1.7755e-08	0.745704	-0.488475	-0.405793	-0.509959	-0.427277	-0.478126
721	Gpkow	1.14076e-07	0.120593	3.4804	5.06466	5.15796	5.69496	5.49534	3.94595	1.67066e-07	0.248315	0.458824	0.0220256	0.579448	0.14265	0.393158
722	Wdr45	0.357685	0.523054	1.29329	1.25146	1.69769	1.42543	1.52664	1.281	0.369343	0.664966	0.234307	0.260864	0.0808219	0.107379	0.147553
723	Otud5	8.34762e-25	0.0176943	0.343099	0.316754	1.84904	2.78664	2.43811	0.335357	4.39941e-24	0.0686942	1.08491	1.11349	1.49535	1.52393	1.36439
724	Slc35a2	2.31586e-08	0.789498	0.179659	0.497934	0.850963	1.09917	1.0069	0.273187	3.48319e-08	0.86237	0.649906	0.305302	0.831447	0.486843	0.656526
725	Pqbp1	2.76646e-10	0.620945	3.62531	3.65503	5.54831	5.8968	5.76725	3.63404	4.47019e-10	0.742563	0.501573	0.492333	0.576376	0.567136	0.546299
726	Timm17b	2.35638e-21	0.53318	11.7207	13.0687	17.3541	19.5603	18.7402	12.1168	1.06531e-20	0.673149	0.528932	0.383616	0.692692	0.547376	0.589725
727	Rbm3	5.64713e-64	0.609438	5.36502	5.99566	17.4768	18.7761	18.2931	5.55034	2.95244e-62	0.73326	1.53748	1.40119	1.63552	1.49922	1.55844
728	Ftsj1	0.00120694	0.725118	0.293817	0.584585	0.61928	0.827835	0.750309	0.379262	0.00147753	0.81923	0.323719	0.0312477	0.498503	0.206031	0.343714
729	Dynlt3	1.04357e-10	0.0158911	8.9904	9.6068	13.5699	11.7125	12.403	9.17154	1.72351e-10	0.0639397	0.544378	0.458003	0.347633	0.261258	0.398013
730	Tspan7	2.18604e-31	0.134704	9.65501	9.17518	15.4139	16.5417	16.1224	9.51401	1.61854e-30	0.26709	0.623382	0.68986	0.719255	0.785733	0.703575
731	Mid1ip1	4.93504e-29	5.26934e-06	7.29053	6.03163	10.3831	13.9969	12.6535	6.92059	3.21041e-28	0.000314023	0.457355	0.69496	0.855128	1.09273	0.785595
732	Bcor	0.00114887	0.521871	1.67048	1.80173	0.670863	1.08266	0.929582	1.70905	0.00140792	0.663986	-0.676504	-0.745724	-0.358671	-0.427891	-0.489496
733	Atp6ap2	6.78117e-64	0.0493665	16.169	15.679	41.1783	46.4826	44.5109	16.025	3.51353e-62	0.135464	1.2967	1.33847	1.4676	1.50937	1.41856
734	Med14	0.0879395	0.135576	5.0593	5.03353	4.93918	5.8723	5.52543	5.05173	0.0954432	0.268462	-0.0288856	-0.0227386	0.181642	0.187789	0.108727
735	Usp9x	9.23097e-11	0.71159	5.93399	7.05962	7.38145	8.29591	7.95598	6.26477	1.52721e-10	0.809203	0.273515	0.0564882	0.42291	0.205883	0.301935
736	Ddx3x	2.66375e-06	0.632878	16.278	16.2487	11.9654	12.6635	12.404	16.2694	3.69293e-06	0.751435	-0.414274	-0.411824	-0.338608	-0.336159	-0.365554
737	Maoa	1.28575e-22	0.574348	3.84	3.80598	8.63796	8.11233	8.30772	3.83	6.13501e-22	0.707209	0.993721	1.0039	0.912813	0.922989	0.946404
738	Maob	2.17954e-30	0.0895954	6.59261	5.09503	11.3696	11.3544	11.3601	6.15253	1.51997e-29	0.203175	0.704136	1.0211	0.702358	1.01932	0.789161
739	Fundc1	3.18993e-21	0.155576	2.78485	2.97239	6.34407	5.64141	5.9026	2.83996	1.43379e-20	0.293712	0.956341	0.88657	0.811251	0.74148	0.846048
740	Ndufb11	5.99151e-22	0.0746888	91.0019	89.0872	128.448	115.528	120.331	90.4393	2.78254e-21	0.179194	0.492641	0.522983	0.340946	0.371288	0.408064
741	Uba1	3.91987e-22	0.147472	72.3542	80.2834	87.4749	102.534	96.9362	74.6843	1.83343e-21	0.28363	0.270388	0.122307	0.497156	0.349074	0.371849
742	Cdk16	1.02675e-05	7.7155e-07	16.9347	13.8238	12.8091	16.7463	15.2827	16.0206	1.38208e-05	7.2016e-05	-0.377134	-0.102288	-0.0152407	0.259606	-0.0639347
743	Araf	0.000344717	0.611875	3.81064	4.61775	5.08238	5.52853	5.36268	4.04781	0.000433734	0.735563	0.338409	0.114645	0.44053	0.216766	0.333977
744	Uxt	0.978692	0.784697	3.32339	3.20555	3.15346	3.21112	3.18969	3.28876	0.978807	0.858653	-0.0578501	-0.0179792	-0.0379614	0.00190953	-0.03372
745	Slc25a5	2.65083e-20	0.224806	14.3026	13.6326	22.7354	24.5427	23.8709	14.1057	1.13235e-19	0.375742	0.633266	0.697856	0.73914	0.80373	0.719367
746	Ube2a	1.73805e-14	0.717226	0.372276	0.616588	1.75376	1.87192	1.82799	0.444069	3.83765e-14	0.813117	1.00483	0.768448	1.06544	0.829062	0.969639
747	Ndufa1	1.87046e-05	0.990039	34.2211	30.3724	33.6147	29.7875	31.2102	33.0901	2.48986e-05	0.994356	-0.0250558	0.141891	-0.194099	-0.0271521	-0.0818388
748	Lamp2	6.60952e-44	0.0136082	5.84937	5.48067	12.6256	15.0391	14.1419	5.74102	1.05086e-42	0.0579844	0.992276	1.0721	1.22755	1.30738	1.16751
749	Mcts1	5.69419e-16	0.157887	2.84592	3.44388	5.85514	5.55573	5.66703	3.02164	1.57552e-15	0.296891	0.833856	0.625364	0.769427	0.560935	0.72926
750	Thoc2	2.62626e-14	0.107884	2.1942	1.96136	4.47429	5.4769	5.1042	2.12578	5.66178e-14	0.230077	0.777215	0.886411	1.01985	1.12904	0.965587
751	Xiap	0.0249425	0.881569	1.92203	2.63866	2.12914	2.76805	2.53055	2.13262	0.0282998	0.923166	0.0987931	-0.217644	0.366846	0.050409	0.172522
752	Stag2	2.75087e-08	0.83029	6.34722	7.48091	7.98692	9.29556	8.8091	6.68037	4.128e-08	0.890254	0.290628	0.0836075	0.486752	0.279731	0.352946
753	Utp14a	0.000653816	0.454723	3.49679	3.48435	4.56359	5.10453	4.90345	3.49313	0.000811628	0.607668	0.307123	0.311117	0.440986	0.44498	0.393836
754	Aifm1	3.61835e-05	0.724917	1.79939	1.74325	0.878936	0.954503	0.926412	1.78289	4.75417e-05	0.819213	-0.575197	-0.54597	-0.518311	-0.489084	-0.530669
755	Firre	6.50082e-84	0.00170621	0.309675	0.317755	5.29348	6.91708	6.31354	0.31205	1.31905e-81	0.0168096	2.26465	2.25578	2.59576	2.58689	2.47875
756	Rap2c	1.19621e-09	0.215913	4.20071	4.72825	5.62656	7.0826	6.54135	4.35573	1.88745e-09	0.366099	0.349551	0.210166	0.636111	0.496726	0.493739
757	Gpc4	2.53059e-22	0.73436	0.344363	0.478129	2.05741	2.31408	2.21867	0.383671	1.19213e-21	0.825426	1.18539	1.04854	1.30169	1.16484	1.21796
758	Hprt	7.32707e-15	0.361636	2.87625	3.30878	5.06218	6.13113	5.73377	3.00336	1.70791e-14	0.52226	0.645172	0.492557	0.879466	0.72685	0.750204
759	Mospd1	0.00109315	0.935908	15.8169	15.9705	12.8746	12.9024	12.8921	15.8621	0.00134118	0.958516	-0.277467	-0.290581	-0.274577	-0.28769	-0.279516
760	Rtl8a	8.93642e-39	0.598092	4.0927	5.17415	6.82873	8.16866	7.67057	4.41049	1.04181e-37	0.723689	0.620348	0.342538	0.84828	0.57047	0.680367
761	Rtl8b	1.59411e-33	0.69849	5.58453	6.59671	9.67011	10.9663	10.4845	5.88197	1.33579e-32	0.799856	0.696423	0.49013	0.861829	0.655536	0.738794
762	Mmgt1	5.36622e-20	0.0794804	2.5877	3.24833	5.96958	5.54185	5.70085	2.78183	2.2572e-19	0.187315	0.958014	0.714177	0.86664	0.622804	0.825259
763	Slc9a6	1.43325e-16	0.799039	5.0938	5.73891	7.80586	8.63522	8.32693	5.28338	4.37941e-16	0.868547	0.531121	0.385949	0.660975	0.515803	0.569862
764	Fhl1	1.09355e-05	0.455025	150.211	126.782	155.112	123.186	135.054	143.326	1.47037e-05	0.607747	0.0460184	0.288898	-0.284059	-0.0411794	-0.0851546
765	Htatsf1	0.00317945	0.0117867	13.3503	13.4398	12.0719	14.8155	13.7957	13.3766	0.00380592	0.0530619	-0.134608	-0.14358	0.140259	0.131287	0.0414494
766	Arhgef6	5.9283e-19	0.312546	1.6182	2.15118	3.6098	4.72122	4.30808	1.77483	2.34981e-18	0.473344	0.816125	0.54881	1.12775	0.860431	0.935792
767	Rbmx	6.69756e-43	0.0537386	0.439205	1.06818	4.01783	5.86631	5.17918	0.624034	1.00664e-41	0.144467	1.80179	1.27871	2.25426	1.73118	1.92783
768	Fgf13	1.91967e-21	0.102523	0.323954	0.384334	1.41028	1.94666	1.74727	0.341697	8.71109e-21	0.222487	0.864346	0.800007	1.15423	1.08989	1.03394
769	1110012L19Rik	0.375866	0.926838	0.41034	0.584957	0.459307	0.613767	0.55635	0.461653	0.387366	0.953351	0.0492403	-0.11916	0.194389	0.0259884	0.0905656
770	Tmem185a	0.00190099	0.435771	0.456207	1.08397	0.76969	1.13878	1.00158	0.640681	0.00230346	0.591533	0.281282	-0.235838	0.554575	0.0374556	0.286845
771	Mtm1	0.694075	0.449458	0.879404	0.804411	0.643757	0.787109	0.733821	0.857367	0.700735	0.602671	-0.193278	-0.134531	-0.0726479	-0.0139007	-0.0993038
772	Mtmr1	0.00916918	0.249664	5.25938	6.07108	4.52259	4.5373	4.53183	5.4979	0.0106763	0.403802	-0.180674	-0.356584	-0.176838	-0.352748	-0.232218
773	Cd99l2	3.88113e-17	0.8403	0.442931	0.698525	1.77484	2.09855	1.97822	0.51804	1.29149e-16	0.897148	0.943403	0.708123	1.10259	0.86731	0.97224
774	Vma21	1.29045e-14	0.0109508	14.9798	18.5374	21.3549	21.2449	21.2858	16.0252	2.90241e-14	0.0506361	0.484341	0.194352	0.477222	0.187233	0.388447
775	Cetn2	0.00249132	0.411458	0.391953	0.738117	0.903427	1.00548	0.967542	0.493676	0.00299862	0.568582	0.451489	0.131074	0.526835	0.20642	0.397527
776	Zfp275	1.77002e-13	0.0739642	1.62493	1.30193	3.51129	4.40471	4.0726	1.53002	3.49735e-13	0.178226	0.781261	0.970694	1.04194	1.23137	1.00358
777	Bgn	7.00256e-82	0.00883211	0.531491	0.691208	12.8675	16.3202	15.0367	0.578426	1.2697e-79	0.0443591	3.1787	3.03558	3.49944	3.35633	3.34482
778	Slc6a8	1.81244e-14	0.024835	5.58924	5.69345	7.19964	8.93549	8.29023	5.61986	3.99215e-14	0.0850926	0.315449	0.29281	0.59248	0.569841	0.488913
779	Bcap31	4.0635e-54	0.0353973	11.6656	12.7005	24.6881	22.8975	23.5632	11.9697	1.13167e-52	0.107696	1.02018	0.906871	0.915943	0.802631	0.921346
780	Abcd1	0.000837985	0.57826	1.23464	1.29228	1.93709	2.25677	2.13793	1.25158	0.00103527	0.709984	0.394344	0.357605	0.5434	0.50666	0.47888
781	Srpk3	2.60194e-29	0.0665105	3.76807	4.73255	7.84166	10.6144	9.58368	4.05149	1.71358e-28	0.166227	0.890912	0.625141	1.28443	1.01866	1.06706
782	Idh3g	2.37742e-07	0.00816291	37.712	39.7718	45.8213	42.2252	43.5619	38.3173	3.44097e-07	0.0422883	0.274384	0.199593	0.159092	0.0843008	0.180649
783	Ssr4	1.81479e-27	0.00166684	6.87504	8.19063	13.7822	12.0097	12.6686	7.26164	1.08227e-26	0.0166519	0.908506	0.68563	0.724224	0.501347	0.726363
784	Naa10	4.60113e-06	0.488979	3.60236	4.38365	4.5844	5.87915	5.39785	3.83195	6.29893e-06	0.636876	0.279031	0.0528189	0.579857	0.353646	0.404984
785	Hcfc1	2.05799e-17	8.15212e-05	5.61753	4.64372	7.45903	10.7796	9.54522	5.33136	7.06046e-17	0.00234704	0.3542	0.583847	0.83192	1.06157	0.736001
786	Irak1	3.26847e-32	0.00450317	5.94203	6.34406	9.87451	13.0905	11.895	6.06017	2.52528e-31	0.0292137	0.64752	0.5663	1.02129	0.940071	0.869038
787	Mecp2	7.63354e-15	0.409853	1.78406	1.98812	3.78202	4.47784	4.21918	1.84403	1.77353e-14	0.567376	0.780428	0.67838	0.976415	0.874368	0.875889
788	Flna	1.62142e-32	5.49081e-05	10.1099	7.83334	18.2366	24.7427	22.3242	9.44093	1.27353e-31	0.00174226	0.792003	1.12282	1.21231	1.54313	1.15958
789	Emd	1.1501e-09	0.0144184	10.8863	10.0552	7.7626	8.7684	8.39452	10.6421	1.81671e-09	0.0600849	-0.439874	-0.3353	-0.283111	-0.178536	-0.309462
790	Dnase1l1	0.0042885	0.0100645	1.1137	2.21861	1.27107	1.21096	1.2333	1.43839	0.00509573	0.0480771	0.103604	-0.503066	0.0649043	-0.541766	-0.126747
791	Taz	3.93948e-06	0.112473	5.4756	5.92507	6.15533	7.86132	7.22716	5.60768	5.41662e-06	0.236841	0.144004	0.0471882	0.452508	0.355692	0.316249
792	Atp6ap1	1.63202e-60	0.000883539	12.2404	13.2048	24.2165	31.1181	28.5526	12.5238	6.78441e-59	0.0117633	0.929422	0.827988	1.27844	1.177	1.12778
793	Gdi1	2.24868e-22	0.00715729	4.43993	4.69433	6.57418	8.83236	7.99293	4.51469	1.06286e-21	0.0387758	0.477501	0.411564	0.853949	0.788011	0.705512
794	Fam50a	4.55889e-16	0.638792	7.50528	7.8739	11.6798	12.5647	12.2358	7.61361	1.28263e-15	0.755872	0.576099	0.514889	0.673427	0.612217	0.619751
795	Lage3	4.41958e-09	0.0591872	7.1831	8.57311	10.2688	10.0216	10.1135	7.59156	6.81449e-09	0.15458	0.461618	0.235278	0.429617	0.203277	0.371322
796	Ubl4a	0.0488797	0.132835	26.9755	27.7301	25.161	28.3947	27.1926	27.1972	0.0542245	0.264428	-0.0967425	-0.135145	0.0713922	0.0329893	-0.000235298
797	Mpp1	5.12291e-68	0.00362984	3.87683	3.33024	15.3049	18.7575	17.4741	3.71621	3.60806e-66	0.0254806	1.74129	1.91279	2.01838	2.18988	1.9698
798	Fundc2	1.19161e-29	0.0167765	69.3024	69.3554	92.1279	84.6704	87.4425	69.318	8.02125e-29	0.066343	0.405639	0.404552	0.285222	0.284134	0.330846
799	Vbp1	3.08176e-06	0.731238	4.4189	5.08311	6.03105	6.45676	6.29851	4.61408	4.26067e-06	0.823415	0.37574	0.20893	0.460549	0.293739	0.378551
800	Pls3	0.00225019	0.547408	0.370676	0.425064	1.03469	0.898872	0.94936	0.386659	0.00271463	0.685326	0.569923	0.513784	0.470255	0.414116	0.491388
801	Tbl1x	0.289425	0.251306	1.21843	1.27435	1.03655	1.61041	1.39709	1.23486	0.300937	0.405842	-0.123414	-0.159328	0.234739	0.198824	0.101099
802	Dmd	3.79467e-09	0.704343	2.55463	2.57758	4.94948	5.2895	5.16311	2.56138	5.86794e-09	0.804347	0.743064	0.733782	0.823246	0.813964	0.791224
803	Zfx	3.33276e-06	0.619003	0.482545	0.607523	1.24353	1.55398	1.43858	0.519271	4.59873e-06	0.740995	0.597695	0.480931	0.784671	0.667908	0.682661
804	Eif2s3x	2.58764e-07	0.202903	4.85271	5.31196	5.73686	7.02296	6.54488	4.98767	3.73823e-07	0.350699	0.20297	0.0939883	0.45503	0.346048	0.333505
805	Apoo	1.86006e-08	0.00689719	11.8249	12.6202	15.9885	14.0327	14.7597	12.0586	2.80706e-08	0.0378544	0.405605	0.318807	0.229155	0.142356	0.271239
806	Asb12	0.000271816	0.00401168	21.7005	23.481	21.5933	18.495	19.6467	22.2237	0.000344039	0.0271192	-0.00682989	-0.115768	-0.219623	-0.328561	-0.169688
807	Las1l	6.24631e-06	0.0650748	11.1299	10.2915	12.9726	14.6699	14.039	10.8835	8.49657e-06	0.163879	0.204038	0.307363	0.369431	0.472756	0.339744
808	Msn	1.25738e-37	0.00164216	6.71685	6.47196	18.9067	26.9493	23.9596	6.64488	1.36155e-36	0.0166322	1.36717	1.41369	1.85673	1.90325	1.70703
809	Eda2r	1.24491e-46	5.72758e-05	7.74502	10.5795	19.4749	17.27	18.0896	8.57795	2.24769e-45	0.00177493	1.22732	0.822285	1.06294	0.657909	0.994999
810	Ar	0.465627	0.530336	4.04996	4.15156	3.28876	3.87097	3.65455	4.07982	0.476645	0.670905	-0.235711	-0.264448	-0.0520627	-0.0807996	-0.126135
811	Yipf6	1.85679e-22	0.668553	0.340607	0.606204	1.82293	2.23018	2.07879	0.418655	8.80554e-22	0.778334	1.07431	0.813536	1.26873	1.00796	1.11784
812	Igbp1	0.000287067	0.00920444	5.76579	7.20711	7.73757	7.17299	7.38286	6.18933	0.000362749	0.0455263	0.368975	0.0903583	0.272606	-0.0060107	0.221585
813	Pdzd11	8.49959e-41	0.0936632	1.64597	2.13003	6.43842	8.29749	7.60642	1.78821	1.12126e-39	0.209336	1.4912	1.24882	1.81305	1.57067	1.62607
814	Snx12	7.74591e-09	0.394553	6.40513	7.15604	8.06382	9.53746	8.98967	6.62579	1.18511e-08	0.553293	0.291593	0.15225	0.50893	0.369587	0.389549
815	Foxo4	0.247738	0.273454	15.5361	15.8553	14.9839	16.8034	16.127	15.6299	0.258951	0.431022	-0.0490007	-0.0765814	0.106535	0.0789543	0.0424976
816	Il2rg	1.85642e-35	0.0701937	0.286389	0.350332	5.66804	7.54139	6.84501	0.305179	1.7637e-34	0.171697	2.37393	2.30395	2.73114	2.66116	2.58753
817	Nono	1.78609e-38	0.117589	1.91035	2.43087	6.04729	7.72262	7.09986	2.06331	2.03763e-37	0.244259	1.27587	1.03849	1.58357	1.34619	1.4028
818	Itgb1bp2	1.45187e-41	0.854522	24.5078	23.6871	46.6428	45.2849	45.7897	24.2666	1.9924e-40	0.906315	0.901321	0.948499	0.859607	0.906785	0.888958
819	Ogt	2.86358e-10	0.932781	4.20218	5.94839	6.87805	8.53346	7.9181	4.71532	4.62362e-10	0.957283	0.598722	0.181159	0.873885	0.456321	0.641902
820	Pin4	6.36434e-17	0.282236	3.43617	4.20565	6.32347	6.411	6.37846	3.66229	2.05815e-16	0.440949	0.723211	0.492449	0.740352	0.50959	0.662281
821	Phka1	3.07715e-15	0.0429731	98.227	127.222	103.064	120.373	113.939	106.747	7.58562e-15	0.123889	0.0686614	-0.301175	0.290649	-0.0791873	0.0932149
822	Rlim	2.63639e-16	0.190422	2.10362	2.00935	4.79482	5.7319	5.38356	2.07592	7.70485e-16	0.335908	0.900812	0.945313	1.11706	1.16156	1.05335
823	Abcb7	1.92152e-15	0.696238	12.4787	12.2657	17.8741	17.1861	17.4419	12.4161	4.88812e-15	0.798028	0.485722	0.508712	0.432153	0.455143	0.459017
824	Vcp-rs	0.0684088	0.480683	9.04075	9.84297	10.6606	10.6368	10.6457	9.27649	0.0749331	0.629051	0.21578	0.104887	0.212828	0.101934	0.180445
825	Atrx	1.03987e-63	0.000689069	9.8134	8.71669	19.5291	22.7337	21.5424	9.49112	5.33843e-62	0.00981981	0.92485	1.07913	1.13412	1.2884	1.10348
826	Magt1	0.000917504	0.505968	3.39053	3.371	4.22276	4.57952	4.4469	3.38479	0.00113187	0.649945	0.250416	0.256848	0.345746	0.352178	0.312927
827	Cox7b	1.61866e-42	0.0003935	140.267	130.852	214.464	176.771	190.783	137.5	2.36202e-41	0.00688584	0.609024	0.708527	0.331598	0.431101	0.469584
828	Pgk1	1.54116e-42	3.14809e-05	90.1499	102.075	122.326	118.654	120.019	93.6541	2.26054e-41	0.00120847	0.436159	0.25878	0.392556	0.215177	0.354494
829	Itm2a	1.13574e-78	0.0122421	12.597	14.5631	33.5547	31.293	32.1337	13.1747	1.56109e-76	0.05447	1.3456	1.15076	1.24793	1.05309	1.22498
830	Apool	8.155e-16	0.206242	1.47468	1.97672	3.8317	3.68749	3.7411	1.62221	2.1951e-15	0.354425	0.965292	0.698809	0.921575	0.655092	0.85444
831	Hnrnph2	1.84011e-05	0.166255	1.3844	1.20808	2.06699	2.51361	2.34759	1.33259	2.45099e-05	0.306805	0.363199	0.474035	0.559328	0.670165	0.521193
832	Armcx3	7.16249e-40	0.701076	1.3809	1.41874	5.58238	5.85399	5.75303	1.39202	8.86302e-39	0.80174	1.4671	1.44435	1.52544	1.50269	1.4973
833	Gprasp1	1.39165e-09	0.226033	2.86998	3.40304	3.97626	5.25713	4.78099	3.02662	2.19136e-09	0.376884	0.362738	0.176563	0.693176	0.507001	0.521748
834	Tceal5	1.009e-14	0.202803	3.11414	3.73689	6.18565	5.93554	6.02851	3.29714	2.30529e-14	0.350699	0.804527	0.601176	0.753417	0.550066	0.709841
835	Bex1	7.92823e-18	0.299111	6.06799	6.73786	10.5669	10.2771	10.3848	6.26484	2.84601e-17	0.459532	0.710636	0.580002	0.674024	0.543389	0.648112
836	Tceal7	1.93469e-35	0.000205361	1.58403	2.54117	10.4943	7.49265	8.60844	1.8653	1.83194e-34	0.00462344	2.15322	1.69862	1.71659	1.26199	1.74562
837	Tceal9	6.67766e-14	0.263978	6.20136	6.39657	9.38881	10.7495	10.2437	6.25873	1.37357e-13	0.420412	0.528688	0.490101	0.706255	0.667669	0.631326
838	Morf4l2	1.18656e-49	0.0227011	16.5986	19.0805	30.8136	29.7096	30.12	17.328	2.5343e-48	0.0804736	0.854179	0.663845	0.803225	0.612891	0.763793
839	Fam199x	0.00108635	0.830291	2.84599	3.05919	1.67252	2.00517	1.88151	2.90864	0.00133303	0.890254	-0.525158	-0.602991	-0.355911	-0.433744	-0.439841
840	Rnf128	4.1036e-25	0.287034	0.342938	0.322445	2.0057	2.35757	2.22677	0.336916	2.19804e-24	0.446212	1.16231	1.1845	1.32203	1.34421	1.27118
841	Prps1	3.94007e-23	0.745397	5.34889	5.63944	9.38759	9.94839	9.73993	5.43427	1.922e-22	0.83243	0.710284	0.645728	0.786143	0.721587	0.739136
842	Tsc22d3	0.00107286	0.461264	25.4198	33.2336	21.8518	27.0356	25.1086	27.7159	0.00131723	0.613053	-0.209307	-0.583103	0.0856399	-0.288156	-0.137325
843	Mid2	2.6953e-06	0.236435	0.259074	0.234885	0.650626	0.892118	0.802349	0.251966	3.73364e-06	0.389277	0.39065	0.418636	0.587639	0.615626	0.525683
844	Atg4a	2.48631e-16	0.363675	4.32395	4.48603	7.43786	7.00324	7.1648	4.37158	7.28763e-16	0.524229	0.66438	0.621116	0.588087	0.544823	0.604072
845	Acsl4	1.90991e-47	0.606327	0.496604	0.846553	3.79514	4.37638	4.16032	0.59944	3.64938e-46	0.730851	1.67988	1.37674	1.84494	1.5418	1.68989
846	Amot	0.0055896	0.273217	24.4734	25.4477	25.1259	28.0609	26.9699	24.7597	0.00659302	0.430937	0.0364892	-0.0176602	0.190085	0.135936	0.118757
847	Alas2	7.64011e-08	0.140265	4.35958	1.05286	3.04865	1.24272	1.91404	3.38787	1.12723e-07	0.274854	-0.404679	0.979802	-1.25687	0.127612	-0.590503
848	Gnl3l	3.37898e-08	0.593993	5.39839	6.60368	7.74408	8.47426	8.20283	5.75258	5.05009e-08	0.720263	0.450599	0.201609	0.566305	0.317315	0.44664
849	Phf8	5.21961e-08	0.301879	0.262302	0.51952	0.74783	1.31306	1.10295	0.337888	7.76021e-08	0.4627	0.469508	0.201949	0.873745	0.606187	0.652456
850	Huwe1	0.000114847	0.112969	6.41937	6.66928	7.30829	9.44407	8.65014	6.49281	0.000147822	0.237708	0.163255	0.11546	0.493315	0.44552	0.365043
851	Hsd17b10	1.3963e-06	0.00132315	13.4104	14.7495	18.0611	15.3937	16.3853	13.8039	1.96163e-06	0.0149638	0.403527	0.27533	0.186033	0.0578369	0.231889
852	Smc1a	1.84773e-30	0.0567836	5.54484	5.37695	11.0909	13.1143	12.3621	5.4955	1.29068e-29	0.150354	0.885492	0.922984	1.10873	1.14622	1.04064
853	Iqsec2	0.00162076	0.274607	8.01645	6.06304	8.21161	7.14227	7.53977	7.44242	0.0019695	0.43225	0.0308937	0.383163	-0.147127	0.205142	0.0165413
854	Kdm5c	0.0418398	0.0434995	3.6322	3.53188	3.08439	4.56519	4.01474	3.60272	0.0466212	0.125068	-0.181577	-0.149989	0.264734	0.296321	0.123687
855	Nbdy	8.98041e-59	0.886883	0.487136	0.802306	5.60781	5.84296	5.75555	0.579752	3.34197e-57	0.927364	2.15164	1.87433	2.20208	1.92478	2.09637
856	Sms	4.53479e-27	0.182179	21.0775	24.6334	12.3829	13.7714	13.2553	22.1224	2.66337e-26	0.326231	-0.722187	-0.937635	-0.579767	-0.795215	-0.697798
857	Mbtps2	0.715418	0.865824	2.06081	2.28138	2.23727	2.37619	2.32455	2.12563	0.721855	0.913979	0.0808648	-0.0195239	0.141482	0.0410932	0.0890134
858	Smpx	1.25929e-43	0.0162191	60.5094	64.5654	97.0813	90.9819	93.2492	61.7013	1.97637e-42	0.0648307	0.67317	0.581044	0.580543	0.488416	0.587985
859	Eif1ax	1.39611e-16	0.325947	11.7639	12.3106	15.6943	17.3706	16.7475	11.9245	4.27512e-16	0.486551	0.387289	0.326788	0.525331	0.46483	0.457502
860	Sh3kbp1	2.54471e-13	0.0490152	10.3158	8.41774	13.4177	13.5627	13.5088	9.75804	4.94776e-13	0.134962	0.349504	0.614389	0.363936	0.628821	0.431512
861	Pdha1	3.34062e-13	0.682027	239.271	222.013	303.543	293.197	297.043	234.2	6.42201e-13	0.788286	0.341984	0.449517	0.29212	0.399653	0.341634
862	Rai2	0.0166007	0.246179	0.308874	0.376762	0.358835	0.646789	0.539748	0.328824	0.0190277	0.399455	0.0540435	-0.0189087	0.331329	0.258377	0.212545
863	Rbbp7	5.59916e-13	0.36979	3.11526	3.15359	5.60827	5.12357	5.30375	3.12652	1.0559e-12	0.53062	0.683291	0.669916	0.573391	0.560016	0.611284
864	Syap1	2.25747e-10	0.943179	3.72606	3.65359	5.76342	5.64857	5.69126	3.70477	3.6672e-10	0.962921	0.517114	0.539408	0.492405	0.514699	0.508155
865	Ap1s2	2.57267e-84	0.280399	7.35952	9.03853	20.3394	23.3331	22.2203	7.85291	5.34739e-82	0.438612	1.35203	1.08797	1.54143	1.27737	1.39116
866	Asb11	0.00723864	0.313745	19.7022	19.6493	18.4188	16.8381	17.4257	19.6866	0.00847475	0.474487	-0.0923314	-0.0886374	-0.214826	-0.211132	-0.166984
867	Trappc2	4.82116e-21	0.00609194	0.261329	0.661506	2.0087	1.6096	1.75795	0.378925	2.14885e-20	0.035103	1.25419	0.856648	1.04888	0.651336	1.00005
868	Rab9	1.2719e-12	0.461004	1.86994	2.41966	4.20737	4.30692	4.26992	2.03148	2.34056e-12	0.612898	0.859533	0.606701	0.886853	0.634022	0.797756
869	Tmsb4x	2.41722e-49	0.0407408	47.1781	43.3956	122.123	140.456	133.641	46.0666	5.09889e-48	0.119106	1.35365	1.47161	1.5539	1.67186	1.51634
870	Msl3	0.000429855	0.982704	0.460049	0.758424	0.961901	1.2532	1.14491	0.547729	0.000537997	0.989205	0.426235	0.157969	0.625956	0.35769	0.470766
871	Zfhx4	3.04756e-18	0.823533	0.333504	0.467669	1.73652	1.94436	1.8671	0.37293	1.14009e-17	0.886353	1.03712	0.898814	1.14273	1.00443	1.06233
872	Pex2	0.0317797	0.78233	2.3936	2.38512	1.8122	1.67083	1.72338	2.39111	0.0357622	0.856943	-0.27112	-0.267512	-0.345531	-0.341923	-0.316361
873	Pkia	3.66721e-05	0.469701	36.1008	36.0454	39.7294	41.1301	40.6095	36.0846	4.81689e-05	0.620396	0.134619	0.136776	0.1834	0.185557	0.166093
874	Mrps28	0.000115933	0.333875	3.68621	4.21484	2.41227	2.23319	2.29976	3.84155	0.000149197	0.493887	-0.457691	-0.611891	-0.535464	-0.689665	-0.55311
875	Tpd52	2.67055e-07	0.506349	4.87404	5.5478	6.29645	7.49213	7.04766	5.07203	3.85606e-07	0.650052	0.312841	0.156185	0.531773	0.375117	0.406391
876	Fabp4	0.000376431	0.18254	36.4303	34.1834	36.8199	31.8501	33.6975	35.77	0.00047273	0.326327	0.0149384	0.10425	-0.18831	-0.0989982	-0.0836989
877	Impa1	0.109142	0.501625	0.891254	1.15932	0.827922	1.34059	1.15002	0.970029	0.117542	0.645945	-0.0491383	-0.240375	0.307532	0.116295	0.126133
878	Snx16	0.0407579	0.66683	0.212781	0.339611	0.41438	0.47117	0.450059	0.250051	0.0454751	0.777275	0.22185	0.0783557	0.278644	0.13515	0.214125
879	Rbis	3.92265e-09	0.0700619	2.27112	3.32708	5.12904	4.76739	4.90183	2.58142	6.06144e-09	0.171571	0.905878	0.502266	0.818137	0.414525	0.720629
880	Car3	8.65826e-65	4.19671e-45	618.685	1185.05	914.123	842.113	868.881	785.117	4.76639e-63	3.57644e-41	0.562431	-0.374127	0.444191	-0.492367	0.146075
881	Ythdf3	0.00751887	0.00481055	8.2674	7.85125	6.40243	8.62129	7.79648	8.14511	0.00879317	0.0304799	-0.324166	-0.257882	0.0540652	0.120349	-0.0560749
882	Armc1	0.0100092	0.0627074	6.02838	5.32924	6.39929	7.3967	7.02594	5.82293	0.011629	0.15995	0.0741952	0.225355	0.256631	0.407791	0.234279
883	Pde7a	9.19543e-15	0.175106	5.91872	5.64174	9.09459	10.1548	9.76068	5.83733	2.1145e-14	0.317299	0.545005	0.60395	0.689084	0.748029	0.654265
884	Gyg	7.61403e-09	0.366308	27.2276	31.2083	22.7419	25.2008	24.2868	28.3974	1.16535e-08	0.52651	-0.249672	-0.439998	-0.107497	-0.297823	-0.217306
885	Tbl1xr1	0.0375992	0.72029	8.85839	9.93587	9.16902	10.6432	10.0952	9.17502	0.0420499	0.814964	0.0447566	-0.104889	0.240061	0.0904156	0.124903
886	Fndc3b	3.84512e-11	0.0139071	2.72036	2.7265	3.95061	5.9543	5.20947	2.72217	6.47336e-11	0.0587152	0.412164	0.409787	0.902461	0.900084	0.738328
887	Tnik	1.20515e-10	0.000824431	4.27343	3.89737	4.84351	6.52601	5.90058	4.16292	1.98345e-10	0.0112955	0.148095	0.254829	0.513143	0.619877	0.41853
888	Mynn	0.095421	0.531748	1.37719	1.85888	1.77229	1.97973	1.90261	1.51874	0.103282	0.67184	0.221817	-0.0443727	0.32592	0.0597302	0.20465
889	Sec62	0.562861	0.370231	24.3633	23.7616	24.2951	26.4112	25.6246	24.1865	0.571648	0.530853	-0.00388474	0.0307513	0.112025	0.146661	0.0801101
890	Skil	4.98378e-23	0.442307	5.00394	5.65655	8.10023	9.31277	8.86204	5.19571	2.42419e-22	0.597171	0.599995	0.451129	0.780452	0.631586	0.670616
891	Pik3ca	0.00331553	0.0741623	17.7239	18.5392	16.9498	20.5144	19.1893	17.9635	0.00396393	0.178433	-0.0609184	-0.122407	0.200424	0.138935	0.0903697
892	Zfp639	7.57981e-06	0.696924	7.55125	8.22717	5.40646	6.38384	6.02052	7.74988	1.02581e-05	0.798599	-0.416608	-0.526361	-0.211766	-0.321518	-0.317685
893	Mfn1	9.39025e-16	0.000378926	31.9935	27.7766	21.7828	24.4241	23.4422	30.7543	2.4984e-15	0.00676283	-0.534237	-0.336949	-0.375988	-0.178699	-0.377577
894	Mrpl47	0.244224	0.0702226	8.28527	7.32709	7.13216	7.88429	7.6047	8.0037	0.255402	0.171718	-0.191305	-0.034174	-0.0636876	0.0934437	-0.0653928
895	Ndufb5	2.25043e-10	0.204045	95.8157	90.4197	85.7377	73.264	77.9008	94.23	3.65647e-10	0.351857	-0.158582	-0.0758473	-0.382578	-0.299843	-0.271377
896	Usp13	1.73295e-10	0.69515	33.4334	35.165	23.0873	25.9073	24.859	33.9423	2.83133e-10	0.797596	-0.515538	-0.586323	-0.355815	-0.4266	-0.434308
897	Ttc14	1.13906e-10	0.166736	2.70859	2.52764	4.62918	5.50456	5.17916	2.65542	1.87757e-10	0.307359	0.602053	0.674223	0.810578	0.882748	0.757373
898	Fxr1	5.54341e-12	0.191589	204.978	199.193	254.62	271.681	265.339	203.278	9.79898e-12	0.337479	0.31151	0.352606	0.404725	0.44582	0.382729
899	Dnajc19	0.000338848	3.06129e-05	12.2221	14.0957	14.869	12.2695	13.2358	12.7727	0.000426601	0.00118583	0.263255	0.0720728	0.00516419	-0.186019	0.0477156
900	Dcun1d1	2.29051e-20	0.557024	9.93294	10.3638	14.5757	15.6431	15.2463	10.0596	9.82864e-20	0.692886	0.510617	0.454847	0.606241	0.550471	0.554818
901	Mccc1	0.0203131	0.153601	5.004	5.75884	6.34347	6.05307	6.16102	5.22582	0.0231521	0.291485	0.290539	0.119686	0.232327	0.0614747	0.201902
902	Acad9	1.15282e-17	0.523555	7.28687	7.78782	11.6376	11.5448	11.5793	7.43408	4.06469e-17	0.665098	0.608829	0.524151	0.598188	0.51351	0.576749
903	Anxa5	1.10564e-64	0.729176	20.883	22.3236	73.8785	77.245	75.9936	21.3064	6.00142e-63	0.821854	1.77474	1.68276	1.83819	1.74621	1.78728
904	Exosc9	0.0108881	0.259831	4.85199	4.6138	5.48169	6.05444	5.84153	4.78199	0.0126105	0.415281	0.147442	0.207392	0.269603	0.329553	0.242751
905	4932438A13Rik	1.86273e-06	0.434134	3.84039	4.34205	2.39083	2.40132	2.39742	3.9878	2.59891e-06	0.590062	-0.513485	-0.655755	-0.509026	-0.651297	-0.553965
906	Il2	2.32645e-11	0.730774	1.92358	2.35208	4.07927	4.29341	4.21381	2.0495	3.96441e-11	0.823002	0.796888	0.599564	0.856462	0.659139	0.773766
907	Nudt6	0.120856	0.111759	1.24696	1.89579	1.42688	1.46106	1.44836	1.43762	0.129649	0.235696	0.111131	-0.254853	0.131309	-0.234675	0.00633885
908	Spry1	2.54438e-43	2.0253e-05	4.40411	3.87178	8.23136	11.2437	10.124	4.24768	3.91393e-42	0.000903642	0.772487	0.922094	1.17991	1.32952	1.08392
909	Ankrd50	3.90251e-42	0.746445	0.449251	0.598949	3.85966	3.86248	3.86143	0.493241	5.53365e-41	0.833273	1.74555	1.60373	1.74638	1.60457	1.70293
910	Larp1b	0.0236935	0.377734	7.56762	8.79854	6.8653	7.39124	7.19573	7.92934	0.0269185	0.538303	-0.123392	-0.317064	-0.0300101	-0.223683	-0.12368
911	Pgrmc2	1.39653e-15	0.0744579	0.867759	1.0848	1.84879	2.75445	2.4178	0.931538	3.61739e-15	0.178741	0.609043	0.450444	1.0073	0.848696	0.823316
912	Jade1	0.0182594	0.0162643	10.664	9.47627	7.73465	9.81874	9.04403	10.315	0.0208672	0.06492	-0.417245	-0.262303	-0.108534	0.0464079	-0.171898
913	Noct	4.79696e-21	0.33956	0.376596	0.641627	1.82141	2.43715	2.20826	0.454478	2.13918e-20	0.499177	1.03531	0.781292	1.32011	1.06608	1.14129
914	Elf2	1.71645e-08	0.574254	2.65861	3.07612	4.61432	4.67738	4.65394	2.7813	2.59539e-08	0.707195	0.617815	0.461914	0.633929	0.478028	0.580373
915	Ndufc1	2.52275e-06	0.0313426	304.109	286.916	347.233	297.615	316.059	299.057	3.49973e-06	0.0995164	0.190726	0.274403	-0.0310403	0.0526363	0.0795158
916	Naa15	8.13661e-07	0.0148166	8.7284	8.15832	9.7579	11.7786	11.0275	8.56088	1.15355e-06	0.0611461	0.145122	0.232241	0.39346	0.480579	0.331119
917	Setd7	0.00137348	0.791893	20.9266	23.9307	21.6487	25.1739	23.8635	21.8093	0.00167667	0.864086	0.046747	-0.138494	0.255451	0.0702102	0.124404
918	Foxo1	3.46059e-14	0.996073	9.37088	10.2181	3.02349	3.87827	3.56053	9.61983	7.34525e-14	0.998094	-1.36602	-1.4793	-1.0881	-1.20138	-1.21949
919	Cog6	0.000573822	0.157565	4.25886	4.83244	3.4831	3.19724	3.3035	4.42741	0.000713884	0.29654	-0.230251	-0.379601	-0.325309	-0.474658	-0.334752
920	Ufm1	9.76458e-06	0.350071	0.456092	0.699054	0.88699	1.44313	1.2364	0.527489	1.31563e-05	0.510403	0.373985	0.151354	0.746628	0.523997	0.550014
921	Alg5	3.2828e-33	0.309398	1.07389	1.22467	4.09444	4.79167	4.53249	1.11819	2.68226e-32	0.470414	1.29659	1.19533	1.48164	1.38039	1.38509
922	Rfxap	2.45316e-05	0.814831	1.38424	1.56676	0.638906	0.746724	0.706645	1.43788	3.24625e-05	0.8801	-0.540797	-0.647217	-0.448879	-0.555299	-0.514462
923	Tm4sf1	2.00004e-11	0.129715	3.24148	3.99811	6.1313	5.80177	5.92426	3.46383	3.42806e-11	0.260163	0.749596	0.512781	0.681341	0.444526	0.63338
924	Wwtr1	6.39407e-10	0.124444	11.3087	10.7811	14.3105	15.7574	15.2195	11.1537	1.01908e-09	0.253311	0.314838	0.378047	0.445114	0.508323	0.416338
925	Commd2	3.52359e-05	0.478461	0.151983	0.409468	0.52522	0.651998	0.604871	0.227648	4.63324e-05	0.627588	0.404898	0.113867	0.520092	0.229061	0.386561
926	Rnf13	0.109725	0.477153	1.67168	2.21261	2.06415	2.2761	2.19731	1.83064	0.118155	0.626548	0.19774	-0.0682586	0.294232	0.0282334	0.175733
927	Pfn2	5.80483e-05	0.0043295	24.3902	29.3738	28.4149	28.1291	28.2353	25.8547	7.55248e-05	0.0284792	0.212272	-0.0462823	0.198188	-0.0603658	0.122538
928	Serp1	9.28199e-49	0.00456365	0.475198	0.524476	5.21258	7.47513	6.63408	0.489679	1.87889e-47	0.0294855	2.07428	2.02688	2.52233	2.47492	2.35745
929	Eif2a	2.42048e-10	0.758155	1.72693	1.66171	3.3631	3.45608	3.42151	1.70776	3.92453e-10	0.842482	0.678076	0.712999	0.708497	0.743419	0.707438
930	Selenot	6.39713e-27	0.891292	12.9986	13.5495	19.5355	20.2516	19.9854	13.1605	3.734e-26	0.930718	0.552837	0.497146	0.602288	0.546596	0.567513
931	Siah2	1.55509e-06	0.574509	0.228534	0.456331	0.577666	0.929121	0.798475	0.295474	2.17897e-06	0.707305	0.360855	0.115454	0.651006	0.405606	0.473294
932	Mbnl1	7.10323e-05	0.143909	30.7968	32.0811	32.4911	37.4235	35.59	31.1742	9.21646e-05	0.280127	0.0748929	0.0177674	0.273106	0.21598	0.185543
933	P2ry1	4.71029e-13	0.00801362	4.3539	3.07663	2.0639	2.20712	2.15388	3.97856	8.93813e-13	0.0419742	-0.805222	-0.412007	-0.739315	-0.346099	-0.658603
934	Dhx36	0.203987	0.190008	3.00639	3.11173	2.39717	3.24142	2.92759	3.03735	0.21488	0.335639	-0.237972	-0.275414	0.0822441	0.0448013	-0.039764
935	Gmps	8.7872e-20	0.825854	0.395757	0.748861	2.14333	2.41154	2.31184	0.49952	3.65826e-19	0.887954	1.17125	0.84588	1.28938	0.964009	1.14313
936	Ssr3	9.07402e-12	0.0574873	7.59378	9.57858	11.1958	11.3701	11.3053	8.17703	1.58201e-11	0.15158	0.505024	0.205243	0.525496	0.225714	0.423185
937	Rsrc1	8.83916e-28	0.167144	0.372964	0.762029	2.36916	3.38585	3.00792	0.487295	5.36902e-27	0.307845	1.2951	0.935152	1.67556	1.31562	1.43016
938	Mlf1	2.19033e-11	0.0227231	59.7357	61.5023	52.1735	45.3694	47.8987	60.2548	3.73993e-11	0.0805057	-0.191835	-0.233201	-0.38937	-0.430736	-0.325027
939	Gfm1	0.157426	0.536057	2.46735	2.59791	2.10167	1.92307	1.98946	2.50572	0.167176	0.675767	-0.160788	-0.214113	-0.246351	-0.299675	-0.229825
940	Mfsd1	7.37583e-37	0.0493844	2.92759	2.65004	8.61943	10.3474	9.70508	2.84603	7.64682e-36	0.135464	1.29231	1.39804	1.53065	1.63638	1.47685
941	Iqschfp	0.00142812	0.580458	11.4406	12.3033	11.9157	13.2108	12.7294	11.6941	0.00174137	0.711545	0.0540685	-0.0426636	0.19193	0.0951978	0.113104
942	Schip1	0.000607489	0.647642	11.6768	12.6214	12.2782	13.5852	13.0994	11.9544	0.000755328	0.762532	0.0668685	-0.03681	0.202311	0.0986325	0.122188
943	Kpna4	0.00870276	0.69719	11.6773	13.4612	10.4252	11.7849	11.2794	12.2015	0.0101443	0.798798	-0.150034	-0.339973	0.0121896	-0.17775	-0.104461
944	Ppm1l	1.8864e-13	0.348154	12.7055	14.2339	15.4487	18.0514	17.0839	13.1547	3.71696e-13	0.508179	0.263211	0.110689	0.475137	0.322615	0.353429
945	Nmd3	5.58783e-06	0.830512	3.57109	3.59681	2.16928	2.06797	2.10563	3.57865	7.61912e-06	0.890267	-0.528382	-0.536479	-0.575255	-0.583351	-0.560037
946	Ppid	0.124042	0.849268	6.37338	6.25267	7.23422	7.2685	7.25576	6.33791	0.132984	0.90219	0.159307	0.183121	0.165299	0.189114	0.170032
947	Etfdh	1.32306e-38	0.173144	5.88304	4.9766	1.0826	1.06607	1.07221	5.61667	1.5278e-37	0.314747	-1.72466	-1.52094	-1.73616	-1.53244	-1.67493
948	Gask1b	3.44156e-21	0.636835	0.346421	0.462492	2.37442	2.70158	2.57996	0.38053	1.54363e-20	0.754498	1.32551	1.20621	1.45901	1.33971	1.37472
949	Plrg1	5.02698e-19	0.477601	9.49291	9.94961	14.4382	15.7677	15.2735	9.62711	2e-18	0.62675	0.557092	0.495627	0.676268	0.614803	0.614773
950	Arfip1	1.05418e-27	0.134512	9.11247	9.52082	14.954	17.2706	16.4094	9.23247	6.37596e-27	0.266832	0.657782	0.600671	0.853387	0.796276	0.766716
951	Fbxw7	6.991e-52	0.864145	0.332666	0.473243	4.26392	4.48592	4.40339	0.373976	1.69254e-50	0.912658	1.98182	1.83714	2.04142	1.89674	1.97551
952	Fam160a1	0.387417	0.58876	3.78035	4.15003	3.41525	3.44007	3.43084	3.88899	0.398788	0.716466	-0.114622	-0.222087	-0.106535	-0.214001	-0.141955
953	Glt28d2	4.13593e-25	0.219279	2.4595	2.40254	7.42281	6.3777	6.7662	2.44276	2.21397e-24	0.369453	1.28374	1.30769	1.09261	1.11656	1.17364
954	Lrba	4.77943e-29	0.792238	2.49796	3.21779	5.62327	6.50071	6.17454	2.70949	3.11393e-28	0.864241	0.921029	0.651057	1.10051	0.83054	0.951665
955	Hdgf	3.66563e-30	6.70133e-06	85.7486	90.3308	93.1738	118.843	109.301	87.0951	2.52739e-29	0.000374331	0.118486	0.044225	0.466232	0.391971	0.324312
956	Mrpl24	3.86574e-06	0.586012	9.06105	8.62544	11.7795	11.9917	11.9128	8.93304	5.31781e-06	0.714657	0.34505	0.408906	0.368809	0.432665	0.378496
957	Nes	1.8197e-70	0.000373252	1.72305	1.67536	11.0699	15.2341	13.6861	1.70903	1.52034e-68	0.00671066	2.14812	2.17361	2.57573	2.60122	2.43861
958	Gpatch4	3.42824e-13	0.702526	2.67487	2.62815	0.566529	0.720455	0.663236	2.66114	6.58451e-13	0.80286	-1.23012	-1.21166	-1.0949	-1.07644	-1.1383
959	Naxe	0.000401034	0.117535	11.9313	12.084	12.8189	15.0407	14.2148	11.9762	0.000503108	0.244259	0.0957842	0.0788429	0.31087	0.293929	0.229612
960	Mef2d	0.00311092	0.00807863	25.9586	24.2908	19.3876	24.6061	22.6662	25.4685	0.00372767	0.0420918	-0.40305	-0.310918	-0.074257	0.0178755	-0.161444
961	Cct3	1.42426e-06	0.867908	7.92358	8.0546	10.5409	10.8488	10.7343	7.96208	1.99927e-06	0.914819	0.371064	0.350035	0.409046	0.388017	0.388832
962	Pmf1	5.24248e-24	0.0292722	12.5903	12.8886	18.8244	22.8612	21.3606	12.678	2.63889e-23	0.0951823	0.544703	0.513374	0.812092	0.780764	0.709108
963	Slc25a44	0.0769804	0.511826	0.436712	0.601293	0.45569	0.776357	0.657156	0.485076	0.0839016	0.655118	0.0189317	-0.137534	0.30615	0.149684	0.158173
964	Lmna	9.81491e-37	0.000107861	19.1953	20.0125	35.3464	53.0098	46.4438	19.4354	1.00653e-35	0.00291807	0.847794	0.790565	1.4192	1.36197	1.21515
965	Lamtor2	0.29949	0.276533	8.14429	7.90169	8.23371	9.06546	8.75628	8.073	0.311023	0.433998	0.0140392	0.0528319	0.138469	0.177262	0.104751
966	Ubqln4	6.70162e-06	0.221271	6.71936	7.27437	4.44129	5.90781	5.36267	6.88245	9.10428e-06	0.372074	-0.504532	-0.604699	-0.160252	-0.26042	-0.309013
967	Rtraf-ps	0.0103805	0.15832	4.35583	4.76234	5.34833	5.06816	5.17231	4.47529	0.012039	0.297313	0.245267	0.139724	0.180148	0.0746049	0.172875
968	Arhgef2	1.6943e-12	0.00202383	1.03225	0.821087	1.71124	2.95316	2.49151	0.970199	3.09316e-12	0.0183944	0.415872	0.574151	0.959929	1.11821	0.825508
969	Rit1	0.000600143	0.736555	5.10933	5.86757	6.11996	7.16383	6.77579	5.33215	0.000746303	0.826883	0.220854	0.05207	0.41823	0.249447	0.296295
970	Dap3	0.000149317	0.0766124	5.46236	5.56974	5.89703	7.35949	6.81585	5.49392	0.000191092	0.182678	0.0939146	0.0701392	0.371353	0.347577	0.267314
971	Ash1l	0.129392	0.0241331	2.12694	1.67942	1.39345	2.35009	1.99448	1.99543	0.138406	0.0835687	-0.385659	-0.162827	0.0994472	0.322279	-0.000458499
972	Rusc1	0.541172	0.32559	2.10502	1.74306	2.15109	2.3226	2.25885	1.99865	0.550605	0.486289	0.0212472	0.200065	0.0977123	0.27653	0.120047
973	Fdps	5.7892e-07	0.670455	0.260273	0.338862	0.89245	0.876204	0.882243	0.283367	8.24733e-07	0.77991	0.586519	0.499248	0.574081	0.48681	0.552519
974	Scamp3	1.03841e-13	0.334674	6.51196	8.04565	10.0263	10.6577	10.423	6.96265	2.09451e-13	0.494725	0.553686	0.285651	0.634022	0.365987	0.520619
975	Gba	2.24829e-24	0.799663	0.247604	0.533508	2.27112	2.66168	2.5165	0.33162	1.1556e-23	0.868893	1.39063	1.09295	1.55335	1.25567	1.40096
976	Krtcap2	1.26542e-19	0.0011809	32.6909	36.5575	45.4409	42.287	43.4594	33.8272	5.21716e-19	0.0141742	0.463036	0.306297	0.361572	0.204833	0.352275
977	Dpm3	5.5804e-12	0.923794	0.389857	0.519688	1.48528	1.64597	1.58624	0.428009	9.86029e-12	0.951599	0.83847	0.709631	0.928861	0.800022	0.856849
978	Zbtb7b	0.336876	0.336033	1.44315	1.56777	1.24032	1.81722	1.60277	1.47977	0.348616	0.49596	-0.125037	-0.196813	0.20553	0.133753	0.0698407
979	Flad1	0.0358108	0.3469	2.85539	2.91498	1.94171	2.47345	2.27579	2.8729	0.0401446	0.506915	-0.390222	-0.412349	-0.150509	-0.172636	-0.241574
980	Pbxip1	4.18492e-06	0.00125267	24.854	26.0333	20.6761	29.9424	26.4979	25.2005	5.74391e-06	0.0145589	-0.254283	-0.318633	0.259199	0.194849	0.0697233
981	Pmvk	4.51028e-13	0.732781	0.349771	0.725985	1.1353	1.60609	1.43109	0.460325	8.57717e-13	0.824717	0.661725	0.307019	0.949174	0.594469	0.735312
982	Ube2q1	6.11027e-20	0.396177	15.0808	16.1628	21.1762	23.5898	22.6926	15.3987	2.56132e-19	0.55457	0.46368	0.36973	0.612723	0.518772	0.530852
983	Hax1	1.3016e-16	0.289931	6.8031	6.97885	9.61151	10.6377	10.2562	6.85475	4.00875e-16	0.449317	0.443511	0.411378	0.576685	0.544552	0.519087
984	Ubap2l	0.00535904	0.0412963	9.66253	9.14741	9.82391	11.795	11.0623	9.51116	0.00632896	0.120317	0.0216713	0.0931099	0.263028	0.334467	0.198581
985	4933434E20Rik	0.142053	0.121337	9.16339	10.134	10.3856	9.97228	10.1259	9.44862	0.151436	0.24893	0.163833	0.0322378	0.110482	-0.0211131	0.0906138
986	Tpm3	3.58482e-20	0.000287408	6.61805	4.99066	10.056	13.3086	12.0995	6.13983	1.52141e-19	0.0057032	0.537339	0.884046	0.909386	1.25609	0.875552
987	Jtb	0.369535	0.67378	9.23195	10.2271	9.49113	10.0645	9.85136	9.5244	0.381164	0.782176	0.0360885	-0.0978213	0.112856	-0.021054	0.0441375
988	Dennd4b	2.64245e-06	2.81461e-07	56.9596	49.8485	45.8216	59.6961	54.5385	54.8699	3.66459e-06	3.47624e-05	-0.307874	-0.119032	0.0665567	0.255398	-0.00858233
989	Gatad2b	0.00182033	0.0180746	19.8642	20.4895	14.8383	20.9778	18.6956	20.048	0.00220697	0.0696659	-0.39761	-0.440211	0.0750136	0.0324129	-0.0958096
990	Npr1	0.174212	0.260386	5.30224	5.11067	5.48636	6.183	5.92404	5.24594	0.184335	0.415996	0.0415453	0.0860785	0.188722	0.233255	0.148694
991	Snapin	5.66512e-05	0.15033	6.17391	7.56723	8.0785	8.27073	8.19927	6.58335	7.37297e-05	0.287503	0.339694	0.0836252	0.369922	0.113853	0.278684
992	Chtop	0.0706061	0.192359	12.0872	13.8061	13.4732	13.6129	13.561	12.5923	0.0772903	0.338625	0.145226	-0.0328158	0.15909	-0.0189524	0.0993148
993	S100a1	0.0580346	0.0548337	152.969	152.588	163.613	145.555	152.267	152.857	0.0639725	0.146763	0.0964362	0.10001	-0.0712028	-0.0676288	-0.00554115
994	S100a16	1.31877e-33	0.370488	13.6813	14.2944	22.0361	23.9638	23.2472	13.8615	1.11053e-32	0.530996	0.64991	0.590894	0.765855	0.706839	0.706242
995	S100a6	2.02355e-64	0.0782418	26.4137	32.9733	97.5573	119.25	111.186	28.3413	1.07779e-62	0.185319	1.84607	1.53656	2.13307	1.82356	1.93489
996	S100a11	2.66492e-45	0.0127533	13.303	15.0159	51.0773	68.8282	62.2297	13.8064	4.51499e-44	0.0556497	1.86433	1.70115	2.28749	2.12431	2.09439
997	S100a10	1.84083e-51	0.458249	0.459145	0.687461	10.7305	11.9255	11.4813	0.526238	4.36979e-50	0.610378	3.00707	2.79734	3.14703	2.9373	3.03172
998	Them4	1.63192e-05	0.662378	2.87902	3.03399	4.407	4.30089	4.34033	2.92456	2.17811e-05	0.774213	0.479138	0.422623	0.450544	0.394029	0.444401
999	Rorc	2.60898e-18	0.410759	28.6499	30.0318	20.6892	20.5338	20.5916	29.056	9.8249e-18	0.568354	-0.451052	-0.516769	-0.461423	-0.52714	-0.477183
1000	Snx27	1.07941e-09	0.0262615	4.94749	4.79963	6.15675	7.69527	7.12336	4.90404	1.70695e-09	0.0883625	0.267023	0.303343	0.547951	0.584271	0.460375
1001	Pogz	2.30365e-13	0.0842385	1.21762	1.33244	2.48046	3.4863	3.1124	1.25136	4.49753e-13	0.195116	0.650265	0.577438	1.01651	0.943687	0.869183
1002	Psmb4	5.32661e-09	0.235841	27.6824	30.4326	34.7216	34.9328	34.8543	28.4906	8.18932e-09	0.388524	0.31663	0.184533	0.325134	0.193037	0.28189
1003	Psmd4	0.0759232	0.671935	25.1253	27.8543	25.142	29.1092	27.6344	25.9273	0.0828149	0.78091	0.00091997	-0.14242	0.204755	0.0614142	0.0886844
1004	Pip5k1a	7.99831e-05	0.434019	3.54392	4.03574	2.20407	2.14375	2.16617	3.68845	0.000103558	0.590001	-0.504031	-0.652297	-0.531451	-0.679717	-0.56637
1005	Vps72	2.67084e-13	0.332007	17.2639	18.4672	11.2247	13.7354	12.8021	17.6175	5.17881e-13	0.492578	-0.579197	-0.671247	-0.309707	-0.401757	-0.431771
1006	Tmod4	3.9956e-15	2.36651e-05	151.536	174.774	184.199	178.724	180.76	158.365	9.67524e-15	0.00100173	0.279929	0.0753587	0.236636	0.0320656	0.1897
1007	Scnm1	6.29305e-12	0.0080519	22.342	27.4638	32.4104	31.2055	31.6534	23.8471	1.10896e-11	0.04206	0.517372	0.23117	0.464382	0.178181	0.394158
1008	Sema6c	1.31737e-41	0.000267939	2.93692	3.14197	6.695	9.96477	8.7493	2.99718	1.81074e-40	0.00545868	0.966853	0.893603	1.47774	1.40449	1.28632
1009	Mllt11	1.49944e-25	1.73071e-13	10.4727	18.4141	17.1285	16.0473	16.4492	12.8064	8.19118e-25	1.34083e-10	0.660048	-0.0988501	0.571332	-0.187566	0.337824
1010	Cdc42se1	1.38434e-25	0.0237615	0.222252	0.284804	1.77992	2.77318	2.40396	0.240633	7.56723e-25	0.0826511	1.1855	1.11349	1.62624	1.55423	1.45614
1011	Prune1	1.96182e-35	0.212359	5.62435	6.16437	10.1567	11.7196	11.1386	5.78304	1.85556e-34	0.361848	0.752062	0.639002	0.941199	0.828139	0.8396
1012	Mindy1	1.57782e-22	0.0773258	9.08814	11.2611	12.4342	16.7917	15.1719	9.72669	7.49926e-22	0.184121	0.413255	0.131826	0.818548	0.537119	0.592289
1013	Ensa	0.371388	0.144222	7.68139	7.30652	6.62948	7.58157	7.22765	7.57123	0.383029	0.28033	-0.18634	-0.122658	-0.0166841	0.0469983	-0.0590209
1014	Mcl1	1.5691e-06	0.000626767	39.0713	37.4752	37.5506	49.8276	45.2639	38.6023	2.19716e-06	0.00931851	-0.0558159	0.00282544	0.343044	0.401685	0.224305
1015	Adamtsl4	0.000951805	0.66979	0.319077	0.690385	0.664391	0.924245	0.82765	0.42819	0.00117283	0.779455	0.335465	-0.0223579	0.544764	0.18694	0.355802
1016	Ecm1	7.59484e-58	0.052326	0.243065	0.388165	4.25326	5.41399	4.98251	0.285704	2.64176e-56	0.141518	2.07931	1.92003	2.36732	2.20804	2.21819
1017	Mrps21	1.02965e-11	0.00236645	44.9036	45.8106	59.4882	51.2858	54.3348	45.1701	1.78637e-11	0.0198884	0.398046	0.369816	0.187811	0.159581	0.261227
1018	Car14	4.65408e-14	0.276335	13.9611	12.5058	6.75706	7.13062	6.99176	13.5335	9.73967e-14	0.433954	-0.947639	-0.799992	-0.879783	-0.732137	-0.862794
1019	Anp32e	4.05067e-41	0.00394775	13.3167	15.569	19.7694	26.3564	23.9078	13.9786	5.40216e-40	0.0268525	0.536758	0.325977	0.934172	0.723391	0.733697
1020	Otud7b	0.00067497	0.962326	6.64471	6.68421	8.48731	8.48278	8.48446	6.65632	0.000837643	0.976266	0.311537	0.304102	0.310848	0.303413	0.308915
1021	Sf3b4	0.0439106	0.0172436	4.81748	4.251	3.3536	4.6569	4.17243	4.65102	0.0488392	0.0674621	-0.418186	-0.270383	-0.0403836	0.107419	-0.127669
1022	Bola1	0.800302	0.544323	1.03194	1.27136	1.02063	1.03002	1.02653	1.10229	0.804455	0.68268	-0.00805243	-0.168752	-0.00136191	-0.162061	-0.0529535
1023	H2ac19	8.6966e-06	0.394696	2.93309	3.59239	1.90201	2.15412	2.0604	3.12683	1.17434e-05	0.553293	-0.438612	-0.662194	-0.318426	-0.542008	-0.431313
1024	H2ac18	0.0183323	0.464625	0.340146	0.57104	0.575373	0.668715	0.634017	0.407996	0.0209476	0.61579	0.233303	0.00397371	0.316347	0.0870179	0.21478
1025	Hjv	2.06682e-43	1.01591e-08	25.2223	26.4344	29.1746	40.4367	36.2502	25.5785	3.20827e-42	2.79276e-06	0.202538	0.137346	0.660114	0.594922	0.48699
1026	Txnip	9.23637e-46	0.154655	16.9736	19.0387	31.53	36.8174	34.8519	17.5804	1.59984e-44	0.292733	0.855895	0.698984	1.07317	0.91626	0.948266
1027	Polr3gl	1.56372e-15	0.0807	2.36392	3.1431	3.43728	5.19205	4.53975	2.59289	4.0175e-15	0.189404	0.399532	0.0989631	0.880275	0.579705	0.624677
1028	Rbm8a	2.69087e-12	0.00966219	8.88366	8.21589	11.0587	13.2575	12.4401	8.68743	4.84709e-12	0.0468114	0.286954	0.387876	0.528599	0.629521	0.472359
1029	Pex11b	3.37423e-07	0.0441774	6.86161	7.93082	9.74131	9.10608	9.34222	7.17581	4.84584e-07	0.126166	0.450274	0.266306	0.362327	0.17836	0.339112
1030	Pias3	0.00356813	0.0728801	0.928406	1.09198	0.802728	1.72781	1.38393	0.976473	0.00425639	0.176645	-0.0972271	-0.214684	0.500336	0.382879	0.270416
1031	Polr3c	1.39496e-14	0.17394	0.509259	0.693719	1.47172	2.12809	1.8841	0.563464	3.1169e-14	0.315786	0.711676	0.545322	1.05144	0.885087	0.883374
1032	Rnf115	0.00875086	0.27651	4.95852	5.77927	6.1146	6.18626	6.15962	5.1997	0.010199	0.433998	0.25583	0.0696533	0.270288	0.0841111	0.207684
1033	Chd1l	2.00315e-16	0.410146	0.571052	0.741176	1.9007	2.38107	2.2025	0.621045	5.98137e-16	0.56769	0.884668	0.736337	1.10575	0.95742	0.982276
1034	Prkab2	1.11343e-06	0.00879724	32.5193	35.2555	29.7783	40.0629	36.2398	33.3234	1.56967e-06	0.0442301	-0.123079	-0.236285	0.292841	0.179635	0.117654
1035	Pde4dip	1.23423e-58	0.0431192	67.3143	82.4315	99.4957	125.221	115.658	71.7566	4.49493e-57	0.124185	0.556875	0.26847	0.885691	0.597287	0.681136
1036	Sec22b	0.00111498	0.564548	1.45852	2.04904	2.40567	2.67988	2.57795	1.63205	0.00136698	0.699488	0.470148	0.159583	0.581868	0.271304	0.442945
1037	Tbx15	0.000337572	0.78635	18.3374	21.3642	17.3419	20.0113	19.019	19.2268	0.000425057	0.859872	-0.0762474	-0.286048	0.119775	-0.0900251	-0.0148988
1038	Atp1a1	1.80076e-19	0.00438953	5.87496	6.42694	8.61381	12.6831	11.1704	6.03716	7.34966e-19	0.0287751	0.483758	0.37234	0.992973	0.881555	0.790315
1039	Casq2	9.61132e-32	0.933314	6.10529	4.24672	17.6541	15.945	16.5803	5.55913	7.23566e-31	0.957354	1.39253	1.83001	1.25389	1.69137	1.42238
1040	Tspan2	0.0219245	0.565933	0.355248	0.496822	0.731539	0.735769	0.734197	0.396851	0.0249553	0.700009	0.353498	0.210152	0.357018	0.213672	0.312089
1041	Sike1	1.37021e-16	0.370883	5.96658	7.11692	9.10555	11.1642	10.399	6.30462	4.20337e-16	0.531294	0.536625	0.316143	0.804124	0.583642	0.642023
1042	Csde1	1.02947e-10	0.709769	180.713	188.816	203.406	214.668	210.482	183.094	1.70055e-10	0.807887	0.169778	0.106841	0.247153	0.184215	0.200091
1043	Nras	1.79249e-16	0.145572	8.31315	9.00807	12.2933	14.9253	13.9469	8.51736	5.38822e-16	0.281916	0.513362	0.409538	0.773976	0.670152	0.651213
1044	Ampd1	8.61253e-55	3.70636e-06	52.4417	72.4368	78.7034	84.0203	82.0438	58.3174	2.49646e-53	0.000235713	0.576676	0.118138	0.669841	0.211304	0.485417
1045	Bcas2	0.091362	0.223503	4.19619	4.32707	3.21196	4.10651	3.77398	4.23465	0.0990569	0.374276	-0.302963	-0.33885	-0.0251168	-0.0610043	-0.1329
1046	Trim33	0.0101135	0.666913	1.15795	1.57597	1.33415	1.92551	1.70568	1.28079	0.0117422	0.777275	0.113233	-0.14222	0.439025	0.183572	0.246459
1047	Hipk1	0.141456	0.922766	1.98301	2.2216	2.49244	2.7906	2.67977	2.05313	0.150837	0.950999	0.227464	0.116455	0.345655	0.234647	0.269326
1048	Slc16a1	2.43662e-15	0.451265	4.69159	5.16986	1.54426	1.4043	1.45633	4.83213	6.09297e-15	0.603972	-1.16159	-1.27799	-1.24321	-1.35962	-1.24752
1049	Rhoc	3.71286e-47	0.0423438	0.944913	1.42098	5.85649	7.92363	7.15522	1.08481	6.92363e-46	0.122369	1.81776	1.50188	2.19793	1.88204	1.96781
1050	Rap1a	0.107206	0.312721	8.83377	8.89359	8.55487	7.87838	8.12985	8.85135	0.11553	0.473432	-0.0415078	-0.0502573	-0.147447	-0.156197	-0.109729
1051	Atp5pb	1.33574e-16	0.276411	96.2048	88.7262	125.105	111.389	116.488	94.0071	4.10501e-16	0.433967	0.375526	0.491023	0.209403	0.3249	0.306402
1052	Wdr77	3.07618e-21	0.0275166	2.00235	1.90166	4.28324	5.65417	5.14455	1.97276	1.38339e-20	0.0910625	0.815328	0.864546	1.14816	1.19738	1.0475
1053	Cept1	0.00686517	0.384121	1.39655	1.28578	1.87545	2.13357	2.03762	1.364	0.0080541	0.544581	0.26283	0.331103	0.386846	0.455119	0.361711
1054	Dram2	0.43805	0.641593	7.05614	6.90502	7.86845	7.335	7.5333	7.01174	0.449063	0.758239	0.138593	0.165914	0.0490925	0.0764131	0.090989
1055	Lamtor5	3.85987e-19	0.0331562	3.20776	3.71192	6.99904	6.06898	6.41471	3.35591	1.54795e-18	0.103202	0.926773	0.763513	0.748448	0.585188	0.767415
1056	Rbm15	0.000198711	0.0171398	3.82905	3.21779	1.93663	2.85722	2.51501	3.64942	0.000252975	0.0673023	-0.717575	-0.522324	-0.324175	-0.128924	-0.403521
1057	Kcnc4	8.32326e-17	0.237841	21.7206	29.8695	26.2033	31.9668	29.8243	24.1152	2.6447e-16	0.391138	0.259785	-0.182401	0.537014	0.0948281	0.295508
1058	Strip1	3.84045e-26	0.000915475	3.3266	2.8023	5.46024	6.97555	6.41227	3.17253	2.16887e-25	0.0119902	0.578353	0.764717	0.882348	1.06871	0.828992
1059	Ahcyl1	7.46954e-10	0.326046	0.938182	1.10227	2.00271	2.60623	2.38188	0.986401	1.1876e-09	0.486614	0.631561	0.514315	0.895788	0.778542	0.76767
1060	Gstm5	0.00278957	0.0055859	21.2339	24.7309	21.2994	19.831	20.3768	22.2615	0.00334875	0.0334715	0.00424257	-0.206502	-0.09403	-0.304774	-0.121899
1061	Gstm2	1.03184e-51	0.00735446	30.5786	34.6432	54.5437	51.824	52.835	31.773	2.49102e-50	0.0395674	0.814679	0.639997	0.742248	0.567566	0.716037
1062	Gstm1	0.234162	0.0451844	116.894	124.616	123.278	117.951	119.931	119.163	0.245423	0.128013	0.0760755	-0.0154536	0.012875	-0.0786542	0.00918846
1063	Gstm4	0.0004475	0.13921	1.719	1.97977	1.94365	3.00075	2.6078	1.79563	0.000559671	0.273351	0.114529	-0.0175924	0.557192	0.42507	0.367944
1064	Amigo1	3.75241e-10	0.000115445	9.15847	8.24115	9.5763	13.4744	12.0254	8.88891	6.02904e-10	0.00305536	0.0581513	0.194691	0.510823	0.647363	0.397443
1065	Sypl2	3.91544e-79	0.0526157	18.8313	22.1072	37.5744	44.7545	42.0855	19.794	5.65549e-77	0.142076	0.95986	0.739297	1.20613	0.985569	1.05103
1066	Psma5	0.0376175	0.113213	4.92129	5.76597	6.08683	5.82251	5.92077	5.16951	0.0420649	0.237948	0.259228	0.0668435	0.204391	0.0120063	0.165776
1067	Sort1	3.75219e-09	0.291457	6.40102	6.06426	8.76665	9.41262	9.17249	6.30206	5.80435e-09	0.451025	0.400138	0.467324	0.492536	0.559722	0.478297
1068	Celsr2	6.21577e-06	0.584046	2.2446	2.43197	0.822882	1.2829	1.1119	2.29966	8.45773e-06	0.713686	-0.831821	-0.912816	-0.507175	-0.588171	-0.643779
1069	Sars	0.0955201	0.12357	9.0998	8.89112	7.33739	8.73742	8.21699	9.03847	0.103368	0.251988	-0.276658	-0.246537	-0.0527148	-0.0225941	-0.123172
1070	Taf13	0.286938	0.255376	3.08283	3.89501	3.13131	3.23872	3.1988	3.3215	0.298497	0.41047	0.0170303	-0.244711	0.0540594	-0.207682	-0.041556
1071	Clcc1	0.0647565	0.0420765	1.50416	1.93079	2.4139	1.82006	2.04081	1.62953	0.0710603	0.121887	0.447097	0.220135	0.171399	-0.0555631	0.209651
1072	Stxbp3	0.028502	0.532862	2.24943	2.67817	3.11379	3.17748	3.1538	2.37542	0.0321842	0.672948	0.340279	0.16148	0.362444	0.183645	0.299365
1073	Amy1	1.05872e-07	0.758108	2.18933	2.27458	3.41315	3.64477	3.55867	2.21438	1.55238e-07	0.842482	0.468555	0.430501	0.542354	0.5043	0.504072
1074	S1pr1	0.0507172	0.303397	1.60628	1.26676	0.850578	0.994323	0.940889	1.50651	0.0561972	0.463942	-0.494017	-0.292654	-0.386093	-0.18473	-0.368961
1075	A930005H10Rik	0.000259808	0.0267546	4.33199	6.48104	4.2503	4.75217	4.56561	4.96351	0.000329036	0.0894129	-0.0222731	-0.510839	0.109432	-0.379134	-0.0996216
1076	Extl2	2.93536e-28	0.741538	0.318231	0.614772	2.34918	2.52867	2.46195	0.405372	1.82726e-27	0.830297	1.34521	1.05248	1.42052	1.12779	1.30063
1077	Rtca	0.0196922	0.583466	4.43777	5.06034	5.35588	5.60834	5.51449	4.62072	0.0224595	0.713283	0.225077	0.0686925	0.281273	0.124889	0.212898
1078	Dbt	0.255402	0.572212	1.41886	1.18246	1.01698	1.00457	1.00919	1.34939	0.266569	0.705904	-0.26213	-0.113759	-0.271032	-0.122661	-0.225677
1079	Lrrc39	0.378002	0.390759	3.4644	4.13463	3.78307	3.92583	3.87276	3.66136	0.389426	0.550785	0.0994702	-0.102323	0.1419	-0.0598938	0.0639903
1080	Agl	1.4696e-59	0.130128	60.2214	73.0751	87.2908	95.2456	92.2886	63.9985	5.71867e-58	0.260623	0.528228	0.253275	0.652685	0.377732	0.521293
1081	Tlcd4	4.33384e-15	0.185875	5.63713	6.43596	3.22399	3.13086	3.16548	5.87188	1.04596e-14	0.329911	-0.651955	-0.815913	-0.684119	-0.848077	-0.722222
1082	Cnn3	1.7693e-41	0.0245803	1.77206	1.46778	6.48407	7.96543	7.41477	1.68265	2.41248e-40	0.0845644	1.43286	1.60061	1.69341	1.86116	1.64927
1083	Abcd3	3.31856e-09	0.147468	4.54835	4.35368	2.25443	2.9256	2.6761	4.49114	5.14476e-09	0.28363	-0.769655	-0.718127	-0.499146	-0.447618	-0.578928
1084	Gclm	0.154163	0.239919	2.87432	3.08046	2.18838	3.07927	2.7481	2.9349	0.163813	0.393341	-0.281117	-0.355907	0.0743694	-0.000421219	-0.0701643
1085	1810037I17Rik	3.76742e-15	0.948318	14.9524	14.2754	20.3351	19.5769	19.8587	14.7535	9.15482e-15	0.966116	0.419459	0.482021	0.367252	0.429814	0.404985
1086	Myoz2	1.64743e-34	0.000854616	11.4588	7.70781	4.625	4.20518	4.36124	10.3565	1.45637e-33	0.0115238	-1.14724	-0.630458	-1.25914	-0.742361	-1.08288
1087	Synpo2	3.61459e-05	0.173811	73.6849	85.4411	67.6349	89.3723	81.2919	77.1396	4.74997e-05	0.315695	-0.121875	-0.332775	0.275064	0.0641631	0.0746968
1088	Sec24d	1.57172e-41	0.283131	1.17406	1.06839	6.02795	6.70044	6.45045	1.14301	2.14996e-40	0.441831	1.69271	1.7646	1.82455	1.89644	1.79769
1089	Snhg8	4.25505e-15	0.595582	14.6198	14.6878	21.4278	20.6755	20.9551	14.6398	1.02811e-14	0.721369	0.52191	0.515645	0.472683	0.466418	0.489335
1090	Camk2d	2.95111e-07	0.143586	7.65164	7.7141	9.2193	10.6915	10.1443	7.66999	4.25107e-07	0.279625	0.240251	0.229872	0.434416	0.424037	0.362197
1091	Ank2	1.97541e-16	0.907314	0.325197	0.511268	1.5615	1.71269	1.65649	0.379875	5.91305e-16	0.940992	0.950783	0.76123	1.03352	0.843964	0.944982
1092	Ap1ar	0.000258746	0.505863	12.3746	12.3363	10.6411	9.87943	10.1626	12.3634	0.000327739	0.649927	-0.200269	-0.196122	-0.297898	-0.293751	-0.259614
1093	Pitx2	4.47783e-35	0.000554238	1.8252	1.14113	4.69843	6.19707	5.63998	1.62418	4.11652e-34	0.00860331	1.01221	1.41219	1.34905	1.74904	1.33931
1094	Pla2g12a	2.01414e-28	0.145649	23.419	23.164	13.867	15.706	15.0224	23.3441	1.26489e-27	0.281916	-0.715889	-0.700744	-0.547636	-0.532491	-0.603478
1095	Sec24b	9.41979e-20	0.0287024	0.348256	0.441088	1.29406	2.08159	1.78884	0.375535	3.91588e-19	0.0938104	0.766808	0.670743	1.19258	1.09652	1.01967
1096	Ostc	1.32817e-16	0.918058	7.8487	8.13906	13.7206	13.8708	13.815	7.93403	4.08468e-16	0.947868	0.734302	0.687722	0.748945	0.702365	0.729674
1097	Hadh	1.92348e-05	1.79532e-05	67.5687	57.1872	64.6	70.9234	68.5728	64.518	2.55844e-05	0.000840642	-0.0638537	0.172994	0.0689126	0.30576	0.0866335
1098	Aimp1	2.10772e-21	0.0010506	33.9364	38.6372	26.5405	23.936	24.9041	35.3178	9.5441e-21	0.0131391	-0.343175	-0.525298	-0.486503	-0.668626	-0.487492
1099	Ppa2	0.0222013	0.0832683	9.25986	9.63602	8.4145	10.3933	9.65773	9.3704	0.0252603	0.193724	-0.124055	-0.176001	0.151174	0.0992278	0.039428
1100	Cisd2	0.0288645	0.497471	1.48457	2.15668	1.88804	2.24182	2.11031	1.68208	0.0325763	0.643023	0.217093	-0.128315	0.383805	0.0383963	0.213707
1101	Ube2d3	5.68424e-06	0.174273	54.0438	58.0871	60.3525	61.0085	60.7646	55.232	7.74562e-06	0.316125	0.156541	0.0542794	0.171885	0.0696226	0.13539
1102	Nfkb1	1.30612e-05	0.0235814	5.08424	4.77342	5.6923	7.25228	6.67239	4.9929	1.75122e-05	0.0823273	0.137426	0.213077	0.439715	0.515367	0.356422
1103	Ppp3ca	1.11873e-30	0.0331736	50.4245	55.1526	68.013	82.1344	76.8851	51.8139	7.91848e-30	0.103215	0.424412	0.297514	0.692991	0.566093	0.56043
1104	Emcn	0.0121666	0.17676	10.1303	8.11397	8.87357	8.34707	8.54278	9.53778	0.0140569	0.319549	-0.172848	0.115493	-0.251907	0.0364348	-0.143089
1105	Ddit4l	5.73003e-23	2.75536e-05	57.0872	68.2831	81.0461	76.2959	78.0617	60.3772	2.78083e-22	0.00111602	0.498215	0.243932	0.412172	0.157889	0.365276
1106	H2az1	6.61013e-14	0.23577	4.85239	6.14583	7.59881	8.04407	7.87855	5.23248	1.36001e-13	0.388482	0.55511	0.267035	0.627946	0.339871	0.510518
1107	Lamtor3	0.16403	0.576528	25.5536	25.3073	27.1142	28.1012	27.7343	25.4812	0.173929	0.708562	0.0823908	0.0958334	0.132171	0.145614	0.117804
1108	1110002E22Rik	3.02925e-09	0.0171462	11.2281	12.8122	11.0059	15.4265	13.7832	11.6936	4.70653e-09	0.0673023	-0.0264526	-0.202199	0.425831	0.250084	0.219865
1109	Adh1	0.014203	0.158767	6.44557	7.24877	8.29711	7.77874	7.97143	6.6816	0.0163388	0.297692	0.320401	0.172603	0.237632	0.0898347	0.223932
1110	Adh5	2.13124e-06	0.0373562	6.33991	7.22137	8.97971	8.20261	8.49148	6.59893	2.96674e-06	0.111702	0.443236	0.279618	0.326281	0.162664	0.320836
1111	Metap1	5.29826e-15	0.183165	10.9492	13.046	15.6649	16.232	16.0212	11.5653	1.26299e-14	0.326821	0.479904	0.246657	0.52818	0.294933	0.437884
1112	Eif4e	5.70375e-20	0.40586	25.8199	26.5895	36.7725	35.7803	36.1491	26.046	2.39563e-19	0.563835	0.494034	0.453216	0.455633	0.414815	0.457912
1113	Rap1gds1	9.07012e-16	0.00176185	6.86107	6.63097	8.51242	11.0858	10.1292	6.79345	2.42002e-15	0.0170905	0.275087	0.317946	0.620512	0.663371	0.514013
1114	Pdlim5	4.39652e-06	0.451204	44.3457	45.9694	33.4906	37.8548	36.2325	44.8229	6.02753e-06	0.603972	-0.394765	-0.44552	-0.222876	-0.273631	-0.299507
1115	Gbp7	7.07321e-17	0.67944	0.427061	0.865557	2.50157	2.73891	2.65068	0.555917	2.26779e-16	0.787031	1.29496	0.908396	1.38957	1.00301	1.2304
1116	Gbp2	3.9597e-24	0.685236	0.318061	0.76848	2.53952	2.81558	2.71296	0.450421	2.0122e-23	0.790201	1.42514	1.00104	1.53349	1.10939	1.3561
1117	Gtf2b	2.17244e-05	0.332842	4.13102	4.33808	6.29291	5.75562	5.95535	4.19186	2.88284e-05	0.493254	0.507251	0.450174	0.396843	0.339767	0.42187
1118	Lmo4	0.000770726	0.000158622	51.2206	42.5256	41.2558	48.3119	45.6889	48.6655	0.000953423	0.00384028	-0.305472	-0.0427177	-0.0826853	0.180069	-0.0891648
1119	Selenof	2.8879e-46	0.00216508	11.3736	14.1117	23.799	22.2774	22.843	12.1782	5.10595e-45	0.0190573	1.00301	0.714613	0.91166	0.623262	0.855408
1120	Sh3glb1	2.30805e-14	2.37444e-05	36.2591	34.1451	38.2924	45.6645	42.9241	35.6379	5.02149e-14	0.00100173	0.0766594	0.160928	0.324734	0.409002	0.261677
1121	Znhit6	1.06163e-10	0.672728	1.58708	1.90954	3.56044	3.64159	3.61143	1.68184	1.75231e-10	0.781593	0.817848	0.648385	0.843294	0.67383	0.781991
1122	Ddah1	3.05886e-72	0.00273328	0.331316	0.605155	5.10531	7.10337	6.36063	0.411786	2.83343e-70	0.0216881	2.19721	1.92735	2.60567	2.33581	2.38231
1123	Bcl10	0.00541419	0.0992363	1.71175	1.69005	1.87196	2.77447	2.43898	1.70538	0.0063932	0.216944	0.0828065	0.0943998	0.477047	0.488641	0.346151
1124	2410004B18Rik	0.11823	0.551577	0.979336	1.1583	0.706057	0.702594	0.703881	1.03192	0.126925	0.689026	-0.214351	-0.339227	-0.217282	-0.342158	-0.254022
1125	Ssx2ip	2.04042e-14	0.461077	11.5779	12.0607	15.5429	16.9066	16.3997	11.7197	4.46889e-14	0.612899	0.395329	0.340989	0.509608	0.455267	0.451995
1126	Gng5	3.34544e-26	0.00301873	67.8687	68.8869	100.411	87.7207	92.4381	68.1679	1.89183e-25	0.0230104	0.558294	0.537121	0.365422	0.344249	0.433907
1127	Rpf1	0.166632	0.257368	1.60131	1.8687	2.35413	2.03529	2.15381	1.67989	0.176622	0.413283	0.366702	0.225544	0.222594	0.0814363	0.234925
1128	Prkacb	0.172403	0.120634	17.0355	16.8495	14.6346	17.1307	16.2028	16.9809	0.182467	0.248315	-0.206097	-0.19114	0.00759407	0.0225514	-0.063815
1129	Ttll7	2.34569e-29	3.9265e-08	17.3507	28.4714	14.0785	16.6253	15.6786	20.6186	1.55322e-28	7.78177e-06	-0.283342	-0.966826	-0.0581882	-0.741672	-0.37428
1130	Dnajb4	0.0398276	0.0147042	4.55267	3.76573	4.28736	5.0941	4.79421	4.32142	0.0444779	0.0608594	-0.0706347	0.149849	0.134231	0.354715	0.122801
1131	Fubp1	1.57082e-23	0.0127868	6.84925	6.33244	11.462	14.1256	13.1355	6.69738	7.77834e-23	0.0557671	0.666913	0.765174	0.946362	1.04462	0.876879
1132	Nexn	1.41415e-33	0.0262212	56.5819	60.7732	78.0746	93.1204	87.5275	57.8136	1.18967e-32	0.0883579	0.4576	0.356233	0.708892	0.607526	0.589977
1133	Zzz3	0.000283077	0.909392	0.423983	0.703526	0.89519	1.21057	1.09333	0.50613	0.000357761	0.942459	0.41241	0.153818	0.634483	0.375892	0.474955
1134	Pigk	2.4652e-08	0.197188	0.322618	0.484223	0.85431	1.4157	1.20701	0.370107	3.70389e-08	0.344185	0.487486	0.321174	0.869043	0.702731	0.687807
1135	Rabggtb	6.29379e-20	0.438996	24.8136	25.7571	40.3819	38.9837	39.5034	25.0909	2.63307e-19	0.594395	0.680869	0.629076	0.631281	0.579488	0.6345
1136	Acadm	8.19757e-25	0.243313	17.1158	14.429	10.7758	9.52276	9.98854	16.3262	4.32568e-24	0.396819	-0.621425	-0.389818	-0.783733	-0.552126	-0.656957
1137	Cryz	1.08539e-31	0.320987	2.15188	2.04317	6.27769	5.57296	5.83493	2.11993	8.13515e-31	0.481679	1.20727	1.2579	1.06033	1.11097	1.13141
1138	Zranb2	0.0129624	0.533543	10.9306	11.0025	12.2201	13.0398	12.7351	10.9517	0.0149399	0.673409	0.148064	0.13939	0.234857	0.226184	0.200646
1139	Srsf11	2.97792e-48	0.000661687	10.0923	10.8814	17.6161	23.2707	21.1687	10.3242	5.90183e-47	0.00961845	0.746987	0.647847	1.12965	1.03051	0.969115
1140	Wls	1.31078e-71	0.0526387	0.483246	0.841463	6.43131	8.06683	7.45886	0.588511	1.17583e-69	0.142093	2.32486	2.01276	2.61184	2.29975	2.41279
1141	Tgs1	0.0177378	0.359322	5.71851	5.16228	6.58096	6.76102	6.69409	5.55505	0.0203037	0.5198	0.174239	0.298916	0.208106	0.332783	0.231143
1142	Chchd7	0.114608	0.858155	10.9893	10.817	9.97909	9.61757	9.75196	10.9387	0.123133	0.909262	-0.126989	-0.106108	-0.175294	-0.154413	-0.151044
1143	Penk	4.22844e-12	0.370264	0.927328	1.18317	2.19587	2.86668	2.61732	1.00251	7.53077e-12	0.530853	0.729605	0.549784	1.00449	0.824672	0.853113
1144	Impad1	4.03074e-05	0.478997	16.9085	18.8017	18.0244	20.9484	19.8615	17.4648	5.28542e-05	0.627809	0.0872088	-0.0577707	0.293472	0.148493	0.176062
1145	Sdcbp	7.88937e-32	0.0695862	6.08761	6.4844	14.5668	18.1176	16.7977	6.20421	5.94984e-31	0.170799	1.1351	1.05652	1.43153	1.35294	1.30478
1146	Nsmaf	0.00014325	0.977687	0.841778	1.09817	1.45032	1.69722	1.60544	0.917121	0.00018341	0.985901	0.411872	0.223841	0.550373	0.362341	0.442586
1147	Rab2a	2.83737e-28	0.324961	43.3367	51.6809	57.7513	63.2576	61.2107	45.7887	1.76755e-27	0.48593	0.40612	0.15734	0.535367	0.286587	0.411004
1148	Chd7	0.0451555	0.0887529	2.62047	2.51952	1.56875	2.41516	2.10053	2.5908	0.0501911	0.201973	-0.495109	-0.454309	-0.0842233	-0.043423	-0.211793
1149	Asph	1.18415e-24	1.66153e-05	59.6164	73.1474	78.7425	78.2106	78.4084	63.5926	6.20242e-24	0.000782296	0.395642	0.104953	0.385987	0.0952974	0.297922
1150	Ndufaf6	0.306731	0.619353	0.45578	0.550494	0.500643	0.716192	0.636066	0.483613	0.318155	0.74131	0.0437885	-0.0471471	0.237419	0.146483	0.141117
1151	Dpy19l4	3.20095e-16	0.758657	0.508334	0.86899	2.05835	2.30202	2.21144	0.614316	9.24381e-16	0.84282	1.0198	0.710493	1.13039	0.821089	0.992296
1152	Virma	1.16631e-50	0.132415	0.258272	0.570355	3.40689	3.18964	3.2704	0.349981	2.65048e-49	0.26384	1.80832	1.48867	1.73538	1.41574	1.66143
1153	Pdp1	2.6225e-34	0.647403	10.6025	10.5714	18.58	18.0145	18.2247	10.5934	2.2922e-33	0.762502	0.754939	0.758811	0.712664	0.716535	0.72966
1154	Otud6b	4.50838e-05	0.788061	5.33612	5.31077	3.64249	3.80507	3.74464	5.32867	5.89632e-05	0.861423	-0.448701	-0.442918	-0.399041	-0.393257	-0.415605
1155	Pip4p2	3.29115e-48	0.626452	0.517721	0.638803	4.77518	4.64667	4.69444	0.553302	6.4924e-47	0.74684	1.92796	1.81722	1.8955	1.78476	1.87422
1156	Tmem64	1.91171e-11	0.292737	7.43813	8.89727	9.15186	11.6318	10.71	7.86691	3.27996e-11	0.452431	0.266749	0.0366403	0.582069	0.35196	0.401232
1157	Decr1	7.17888e-06	0.660501	19.9283	19.3472	17.0655	15.8469	16.2999	19.7576	9.73403e-06	0.772761	-0.212218	-0.171595	-0.312974	-0.27235	-0.262874
1158	Rmdn1	1.27999e-06	0.777394	0.332003	0.297257	0	0	0	0.321792	1.80091e-06	0.854061	-0.413597	-0.375464	-0.413597	-0.375464	-0.402495
1159	Wwp1	0.110413	0.891997	27.6606	28.2099	29.4462	30.2574	29.9558	27.822	0.11882	0.930936	0.0871931	0.0598019	0.125127	0.0977364	0.103039
1160	Tstd3	5.23711e-05	0.34829	0.274251	0.534126	0.817824	0.85951	0.844014	0.350618	6.83053e-05	0.508241	0.512564	0.244796	0.545273	0.277505	0.449231
1161	Usp45	0.0655055	0.217508	1.56722	1.41777	1.767	2.19873	2.03824	1.5233	0.0718638	0.367925	0.108116	0.194647	0.317293	0.403823	0.267925
1162	Pnisr	2.61375e-25	0.136432	4.24814	4.41973	7.44478	8.71553	8.24316	4.29856	1.41694e-24	0.269512	0.686255	0.639841	0.888488	0.842073	0.802786
1163	Coq3	0.107196	0.466328	5.58389	5.53413	5.13908	4.51186	4.74501	5.56927	0.11553	0.617376	-0.100918	-0.0899732	-0.256402	-0.245456	-0.193422
1164	Fbxl4	1.28292e-18	0.109412	3.77475	4.82239	1.66051	1.87191	1.79333	4.08261	4.96022e-18	0.232173	-0.84372	-1.12991	-0.733412	-1.0196	-0.863583
1165	Ndufaf4	2.2756e-17	0.33345	26.4722	24.8855	15.5304	16.161	15.9266	26.0059	7.77261e-17	0.493686	-0.732848	-0.647022	-0.678839	-0.593013	-0.673985
1166	Ufl1	1.4264e-06	0.47889	2.71466	3.4664	4.39271	4.67775	4.57179	2.93557	2.00194e-06	0.627765	0.537779	0.271898	0.612089	0.346208	0.50157
1167	Map3k7	0.11297	0.269922	6.63952	6.26012	5.54908	5.95041	5.80122	6.52803	0.121434	0.427323	-0.22219	-0.148703	-0.136383	-0.0628963	-0.146478
1168	Rragd	0.0125843	0.0592486	8.39314	10.001	8.01223	7.87131	7.9237	8.86562	0.0145198	0.154666	-0.0597237	-0.287679	-0.0824596	-0.310415	-0.144769
1169	Ube2j1	2.73036e-14	0.71093	12.7937	14.4821	17.9597	19.1286	18.694	13.2899	5.86986e-14	0.808711	0.458922	0.292329	0.545233	0.37864	0.462767
1170	Pnrc1	0.0508071	0.125847	12.2118	12.4196	9.52906	12.1064	11.1483	12.2729	0.0562747	0.255349	-0.327451	-0.349961	-0.0115597	-0.0340701	-0.127723
1171	Rngtt	0.00136005	0.211846	2.68611	2.13536	1.52121	1.63989	1.59577	2.52426	0.0016605	0.361287	-0.54798	-0.314512	-0.481622	-0.248154	-0.441158
1172	Akirin2	1.74669e-13	0.0200759	8.72584	9.21418	10.6792	13.7393	12.6017	8.86934	3.45366e-13	0.0743211	0.264044	0.193366	0.599769	0.529092	0.462766
1173	Orc3	4.00262e-05	0.909021	2.47792	2.97214	1.19021	1.62233	1.4617	2.62315	5.24935e-05	0.942303	-0.667157	-0.858851	-0.407373	-0.599067	-0.55759
1174	Rars2	2.7379e-05	0.681505	4.12937	4.95106	5.35534	5.91362	5.70609	4.37083	3.61855e-05	0.788138	0.309188	0.094823	0.430661	0.216296	0.320328
1175	Slc35a1	0.000212698	0.668429	0.319424	0.61246	0.810173	0.987912	0.921841	0.405536	0.000270459	0.778297	0.456219	0.166865	0.591345	0.30199	0.451369
1176	Smim8	0.000353782	0.338495	0.263491	0.576993	0.715601	0.807448	0.773306	0.355617	0.000444877	0.498126	0.441298	0.121538	0.516539	0.196778	0.387492
1177	C9orf72	0.0149009	0.203831	2.28408	3.41242	2.60845	3.02998	2.87328	2.61566	0.0171232	0.351628	0.135886	-0.290191	0.295282	-0.130796	0.0993001
1178	Smim27	3.51529e-11	0.0158818	8.55749	9.45616	12.7621	11.3919	11.9013	8.82157	5.93684e-11	0.0639324	0.526	0.396349	0.374699	0.245049	0.393488
1179	Ndufb6	7.9174e-06	1.58214e-05	27.2981	28.5267	31.2926	24.9695	27.3199	27.6591	1.07065e-05	0.000753019	0.190497	0.12918	-0.123888	-0.185206	-0.0171771
1180	Aptx	0.00341476	0.904616	0.280333	0.433459	0.58569	0.713747	0.666145	0.325331	0.00407685	0.939337	0.308591	0.14561	0.420635	0.257654	0.330161
1181	Dnaja1	2.02365e-05	0.93302	5.09326	5.33577	6.6298	6.93208	6.81971	5.16452	2.68873e-05	0.957283	0.32443	0.268125	0.380484	0.324179	0.343126
1182	Smu1	7.12762e-06	0.096018	0.988506	1.96384	1.94243	2.1939	2.10043	1.27512	9.66915e-06	0.212813	0.565325	-0.0104578	0.683637	0.107853	0.446526
1183	B4galt1	3.4582e-10	0.0521947	2.51582	2.71752	3.80492	5.51328	4.87824	2.57509	5.56368e-10	0.141252	0.450651	0.37017	0.889525	0.809043	0.717403
1184	Bag1	2.91213e-05	0.101636	16.7338	16.9325	18.1257	20.7808	19.7938	16.7922	3.84524e-05	0.221011	0.10901	0.0929309	0.296559	0.28048	0.224912
1185	Chmp5	1.61478e-06	0.492127	3.51443	3.78105	5.52532	5.31332	5.39213	3.59278	2.25926e-06	0.639413	0.531506	0.44872	0.483855	0.40107	0.476929
1186	Nfx1	3.3151e-07	0.0220725	1.5032	1.06097	2.18689	2.88801	2.62738	1.37325	4.76333e-07	0.0791333	0.348374	0.628823	0.635258	0.915706	0.612066
1187	Aqp7	8.12879e-07	0.490825	0.346757	0.445346	0	0	0	0.375728	1.15264e-06	0.638081	-0.429489	-0.531415	-0.429489	-0.531415	-0.460195
1188	Nol6	0.0237366	0.00700833	2.47213	2.1557	1.70995	2.87074	2.43924	2.37915	0.0269639	0.0381422	-0.357554	-0.21969	0.156787	0.294651	0.0254327
1189	Ube2r2	2.2556e-07	0.00095187	30.2776	28.4428	22.2945	27.1148	25.323	29.7384	3.26631e-07	0.0122535	-0.425139	-0.337924	-0.153799	-0.0665836	-0.22372
1190	Ubap2	6.86777e-41	0.0647829	7.04175	8.96009	11.9855	15.7609	14.3574	7.60547	9.11637e-40	0.163386	0.691316	0.382666	1.05952	0.750866	0.835612
1191	Dcaf12	3.88139e-23	4.25642e-05	9.9939	8.97021	12.7796	16.5519	15.1496	9.69308	1.89446e-22	0.00148661	0.325826	0.466833	0.67492	0.815927	0.59482
1192	Ubap1	0.036351	0.385575	14.301	16.7268	13.9985	15.2604	14.7914	15.0138	0.0407287	0.546098	-0.0288031	-0.241112	0.0877425	-0.124566	-0.0201838
1193	Nudt2	0.001558	0.282255	0.435545	0.502179	0.676569	1.03914	0.90436	0.455126	0.00189486	0.440949	0.223913	0.158455	0.50636	0.440902	0.388162
1194	Myorg	3.78832e-19	0.899341	0.481209	0.673108	2.17218	2.41273	2.32331	0.5376	1.52068e-18	0.936255	1.0987	0.922946	1.20415	1.02839	1.11194
1195	Fam219a	4.3587e-06	0.357794	4.4027	4.52706	5.93137	6.84526	6.50554	4.43924	5.97857e-06	0.518558	0.359462	0.326629	0.538141	0.505308	0.46455
1196	Cntfr	1.46011e-10	0.00148231	12.8712	8.78898	6.79517	7.62093	7.31397	11.6716	2.39428e-10	0.0157726	-0.831437	-0.328579	-0.686172	-0.183315	-0.607986
1197	Il11ra1	2.1535e-12	0.00351427	24.5467	22.8121	29.3445	35.95	33.4946	24.0369	3.90719e-12	0.0252093	0.248299	0.349742	0.532442	0.633884	0.462312
1198	Rpp25l	1.15764e-09	0.299771	11.4051	12.4211	15.4526	15.2749	15.341	11.7037	1.82829e-09	0.46038	0.407386	0.29382	0.391717	0.278151	0.363252
1199	Galt	0.000104643	0.72292	0.306414	0.319708	0.80473	0.909913	0.870813	0.310321	0.000134953	0.817181	0.46617	0.451564	0.547894	0.533288	0.513745
1200	Ccl27a	0.073186	0.687069	0.342887	0.330125	0.529424	0.59235	0.568959	0.339137	0.0799809	0.791672	0.187651	0.201427	0.24582	0.259596	0.228504
1201	Dnajb5	0.0335237	0.0367115	8.48389	7.51037	6.54365	7.63357	7.22842	8.19781	0.0376501	0.110316	-0.330216	-0.173959	-0.135523	0.0207344	-0.160676
1202	Vcp	4.00728e-10	0.937285	38.5287	45.8878	44.746	52.3747	49.5389	40.6912	6.4349e-10	0.959011	0.210745	-0.0355654	0.433255	0.186944	0.27765
1203	Stoml2	0.000436296	0.816337	9.98117	9.67666	12.371	11.8161	12.0224	9.89169	0.000545738	0.881057	0.28407	0.324642	0.222926	0.263497	0.257763
1204	Tesk1	0.0305517	0.712117	0.395939	0.600194	0.518462	0.812398	0.703134	0.455961	0.034403	0.809586	0.121375	-0.0756364	0.376665	0.179653	0.22622
1205	Tpm2	4.31697e-43	0.000104929	2417.08	2342.03	1813.77	1991.77	1925.6	2395.02	6.57211e-42	0.00286603	-0.414069	-0.368587	-0.279084	-0.233601	-0.314582
1206	Tln1	0.00104379	0.00149237	25.0742	24.4633	21.0567	26.6523	24.5722	24.8947	0.00128357	0.0158381	-0.241409	-0.207203	0.0847731	0.118979	-0.0180786
1207	Creb3	0.0727517	0.564711	2.82211	2.99694	2.2783	2.12538	2.18222	2.87349	0.0795471	0.699548	-0.221423	-0.285947	-0.290338	-0.354863	-0.283597
1208	Rgp1	0.000398923	0.916294	0.300424	0.316752	0.745575	0.786125	0.771052	0.305223	0.000500533	0.947193	0.42472	0.406718	0.457851	0.439849	0.44031
1209	Npr2	6.63831e-09	0.00232129	13.6287	12.8973	8.7624	11.4857	10.4734	13.4138	1.01803e-08	0.019664	-0.583493	-0.509494	-0.228526	-0.154526	-0.329158
1210	Hint2	0.0799456	0.265586	6.90892	5.67409	6.31903	5.96871	6.09893	6.54605	0.0870444	0.422419	-0.111829	0.133082	-0.18259	0.0623203	-0.0881204
1211	Clta	8.60809e-37	0.0423451	9.31356	9.84302	17.0506	20.5865	19.2721	9.46914	8.85968e-36	0.122369	0.807503	0.735279	1.06559	0.993362	0.953351
1212	Tomm5	6.8645e-05	0.677978	0.389336	0.485034	1.02933	1.01222	1.01858	0.417458	8.91214e-05	0.785658	0.546611	0.450511	0.53439	0.43829	0.510035
1213	Slc25a51	3.5153e-05	0.00951219	7.36536	7.44621	7.20164	9.27645	8.50518	7.38912	4.62306e-05	0.0465202	-0.0285155	-0.042391	0.296841	0.282965	0.180195
1214	Tmod1	1.53488e-07	0.962161	20.7466	24.5464	22.7726	26.6553	25.212	21.8632	2.23785e-07	0.976251	0.12851	-0.10382	0.346769	0.114439	0.197201
1215	Tstd2	0.204282	0.118948	2.99829	2.79843	2.15037	2.8722	2.60388	2.93956	0.215138	0.246158	-0.343861	-0.269879	-0.0462314	0.0277506	-0.128485
1216	Anp32b	7.68488e-16	0.000344928	11.0923	11.0969	12.4504	16.4914	14.9893	11.0937	2.07709e-15	0.00634494	0.153554	0.153007	0.532556	0.532009	0.40285
1217	Col15a1	1.62329e-70	1.2392e-06	4.62622	3.3968	14.1102	19.2342	17.3295	4.26495	1.36967e-68	0.000100576	1.42528	1.781	1.84656	2.20227	1.79967
1218	Tgfbr1	2.02763e-40	0.0477609	1.78904	2.15886	6.02915	7.89437	7.20102	1.89772	2.63407e-39	0.132752	1.33358	1.15395	1.67312	1.49349	1.50089
1219	Alg2	1.73545e-29	0.921134	0.346087	0.816038	3.02118	3.53915	3.34661	0.484187	1.15724e-28	0.950163	1.57885	1.14683	1.75365	1.32163	1.55022
1220	Sec61b	9.09678e-23	0.418025	4.8195	7.04941	9.04313	10.5128	9.96647	5.47478	4.37735e-22	0.574768	0.787243	0.319255	0.98427	0.516282	0.760197
1221	Erp44	2.39618e-06	0.145974	4.56282	5.29615	6.80176	6.46297	6.58891	4.77831	3.32957e-06	0.282211	0.487984	0.30933	0.423935	0.245281	0.393244
1222	Cavin4	1.43959e-33	0.0735907	7.80713	9.17076	14.7739	14.3655	14.5173	8.20784	1.20988e-32	0.177811	0.840794	0.63311	0.802947	0.595263	0.75294
1223	Mrpl50	0.348994	0.412411	6.19749	6.28226	6.03396	5.57007	5.74251	6.2224	0.360762	0.569599	-0.033156	-0.050048	-0.131584	-0.148476	-0.0991916
1224	Tmem246	0.000526493	0.57205	4.69818	5.30483	3.49605	3.73163	3.64406	4.87645	0.000655865	0.705904	-0.341843	-0.487798	-0.268162	-0.414118	-0.339557
1225	Rnf20	0.00331838	0.0620669	5.53351	4.18822	6.28856	6.87293	6.6557	5.13818	0.00396679	0.159223	0.157776	0.490394	0.269042	0.60166	0.318723
1226	Abca1	4.80302e-92	0.0044845	0.467371	0.788992	8.93971	11.5253	10.5642	0.561882	1.2791e-89	0.0291955	2.75997	2.47406	3.09355	2.80763	2.88831
1227	Slc44a1	5.84561e-37	0.381862	1.56991	2.26613	5.35902	6.62876	6.15676	1.7745	6.08257e-36	0.542281	1.30709	0.96122	1.56973	1.22387	1.36708
1228	Tmem38b	0.98326	0.74475	3.38546	3.23915	3.17952	3.29681	3.25321	3.34247	0.98326	0.832355	-0.06939	-0.020437	-0.029464	0.0194889	-0.0299631
1229	Rad23b	0.000155303	0.0147924	18.9382	20.1078	16.3575	21.5336	19.6095	19.2819	0.000198514	0.0611353	-0.199981	-0.282218	0.176539	0.0943024	0.0231141
1230	Tmem245	4.86874e-24	0.711924	0.375307	0.585386	2.12819	2.47213	2.34428	0.437041	2.46094e-23	0.809475	1.18558	0.980495	1.33607	1.13099	1.2186
1231	Ptpn3	9.89818e-43	0.63447	46.313	47.0958	24.2367	23.575	23.8209	46.543	1.47469e-41	0.75242	-0.906716	-0.930388	-0.945047	-0.968719	-0.937676
1232	Pakap	0.125776	0.806035	0.381346	0.498208	0.617296	0.678432	0.655706	0.415687	0.134741	0.873474	0.227508	0.110345	0.281039	0.163875	0.225943
1233	Txn1	5.33155e-31	0.987758	40.2865	40.3172	67.4428	67.5414	67.5047	40.2955	3.84395e-30	0.992885	0.729229	0.728156	0.731305	0.730231	0.730218
1234	Ecpas	0.00219931	0.112783	8.63876	8.26178	9.34115	10.4571	10.0423	8.52798	0.00265588	0.237435	0.101477	0.159035	0.249327	0.306884	0.212797
1235	Ptbp3	1.0085e-53	0.0560622	0.317764	0.398853	4.96201	6.25748	5.77592	0.341593	2.74583e-52	0.149254	2.17771	2.09155	2.46138	2.37522	2.33647
1236	Hsdl2	0.443808	0.584424	9.88736	8.80472	9.95518	9.44535	9.63487	9.56921	0.454802	0.713847	0.00895936	0.160065	-0.0597935	0.0913121	0.00893376
1237	Slc31a1	0.00145765	0.422539	1.51893	1.41045	2.17922	2.45157	2.35033	1.48705	0.00177586	0.57892	0.33586	0.399367	0.454441	0.517947	0.429865
1238	Cdc26	0.142077	0.94713	3.0774	3.40682	2.44286	2.73477	2.62626	3.1742	0.151442	0.965368	-0.244042	-0.35613	-0.126629	-0.238716	-0.203018
1239	Pole3	1.97534e-23	0.0377151	0.374917	0.822989	2.97485	2.53505	2.69854	0.506588	9.74181e-23	0.112473	1.53156	1.1246	1.36239	0.955426	1.29567
1240	Atp6v1g1	1.30334e-66	5.88664e-08	69.249	87.332	103.146	103.909	103.626	74.5629	8.16694e-65	1.06736e-05	0.568062	0.237603	0.578593	0.248134	0.469487
1241	Tmem268	0.00411434	0.0393663	3.51291	3.34367	1.89154	3.08912	2.64395	3.46318	0.0048922	0.11631	-0.642223	-0.58708	-0.142268	-0.0871242	-0.29257
1242	Tle1	0.011474	0.921286	1.20375	1.53569	0.611139	0.906274	0.796564	1.30129	0.0132728	0.950163	-0.451878	-0.654296	-0.209204	-0.411622	-0.357203
1243	2310002L09Rik	0.215077	0.951991	32.6691	32.499	35.1568	35.1398	35.1461	32.6191	0.226087	0.969156	0.102841	0.110147	0.102162	0.109468	0.104557
1244	Dmac1	4.28528e-07	0.666759	2.77895	2.69319	4.36301	4.55103	4.48114	2.75374	6.13148e-07	0.777275	0.50506	0.538178	0.554772	0.58789	0.546146
1245	Mpdz	0.755634	0.504256	2.85497	2.75136	2.42664	2.70922	2.60417	2.82452	0.760722	0.648645	-0.169927	-0.130618	-0.0556067	-0.0162981	-0.0856116
1246	Nfib	1.38887e-06	0.0418872	32.256	33.9256	33.2453	40.1467	37.5813	32.7466	1.95216e-06	0.121581	0.0422917	-0.0283775	0.307163	0.236494	0.193158
1247	Psip1	0.0026863	0.653521	2.40743	2.38937	3.32761	3.58709	3.49064	2.40212	0.0032275	0.767142	0.344888	0.352556	0.428897	0.436565	0.400486
1248	Rraga	1.39559e-07	0.565493	7.36506	8.33099	9.78115	10.2342	10.0658	7.64891	2.03756e-07	0.699946	0.366064	0.208408	0.425447	0.267792	0.355515
1249	Haus6	4.91091e-16	0.0428466	6.19851	6.07804	9.13037	11.1287	10.3858	6.16311	1.37216e-15	0.123567	0.492915	0.517265	0.752648	0.776998	0.668582
1250	Plin2	1.09407e-33	0.167512	3.93741	4.44454	14.3705	17.5374	16.3602	4.08643	9.26809e-33	0.308322	1.63834	1.49728	1.90861	1.76756	1.77105
1251	Mllt3	0.0661389	0.178934	64.9774	63.5629	66.6205	59.7572	62.3085	64.5617	0.07254	0.322384	0.0354893	0.0667544	-0.118917	-0.0876519	-0.0504558
1252	Klhl9	9.81171e-09	0.255263	6.91229	7.09815	9.11935	10.4765	9.97201	6.96691	1.49661e-08	0.410444	0.354948	0.321452	0.536515	0.503019	0.461736
1253	Mtap	1.80735e-42	0.701066	5.42478	5.5253	11.6398	12.0732	11.9121	5.45431	2.62079e-41	0.80174	0.976253	0.953856	1.02489	1.0025	1.00039
1254	Tusc1	3.51067e-48	0.140563	1.10419	0.979216	6.54026	7.53587	7.16577	1.06746	6.89354e-47	0.275139	1.84135	1.92969	2.02028	2.10861	1.98173
1255	Plaa	0.12439	0.0689549	5.95531	5.33237	4.18817	5.54181	5.03862	5.77225	0.13334	0.169787	-0.422889	-0.287519	-0.0884261	0.0469438	-0.165417
1256	Tek	4.05505e-09	0.924584	0.4048	0.76074	1.06487	1.44714	1.30504	0.509397	6.25808e-09	0.951837	0.555683	0.229866	0.800732	0.474915	0.610819
1257	Jun	0.192835	0.0780229	3.94295	3.59729	2.82024	3.87727	3.48434	3.84137	0.203434	0.184989	-0.371709	-0.267121	-0.0192968	0.0852908	-0.110519
1258	Fggy	2.038e-06	0.662963	0.268295	0.347186	0.78414	0.968101	0.899718	0.291478	2.83973e-06	0.774684	0.492338	0.405279	0.633914	0.546855	0.556762
1259	Hook1	0.0778894	0.427514	1.83433	2.00357	1.49861	1.33918	1.39844	1.88406	0.0848598	0.583298	-0.181887	-0.265554	-0.27701	-0.360677	-0.266007
1260	Nfia	1.6645e-08	0.0198946	4.54874	4.2089	5.78037	7.55044	6.89246	4.44888	2.51817e-08	0.0738743	0.289205	0.380385	0.623839	0.715019	0.534516
1261	Tm2d1	0.0012393	0.242762	4.17646	4.44927	5.82969	5.2964	5.49464	4.25663	0.00151569	0.39625	0.399853	0.325758	0.282561	0.208465	0.305111
1262	Usp1	8.71993e-19	0.471911	3.32401	3.29033	6.20379	6.66736	6.49504	3.31411	3.4229e-18	0.622062	0.736387	0.747668	0.826361	0.837642	0.796873
1263	Alg6	1.28689e-21	0.0450627	3.69919	3.5316	6.19062	7.38114	6.93859	3.64994	5.893e-21	0.127795	0.613705	0.666097	0.834734	0.887127	0.771671
1264	Pgm1	7.64557e-28	2.58436e-07	234.994	304.505	269.846	289.209	282.012	255.42	4.65397e-27	3.27265e-05	0.198725	-0.173719	0.298345	-0.0740995	0.142351
1265	Raver2	0.0001561	0.91452	0.331545	0.315106	0	0	0	0.326715	0.000199503	0.946508	-0.413102	-0.395179	-0.413102	-0.395179	-0.407858
1266	Jak1	8.48936e-05	0.329631	14.7807	15.0653	16.7169	18.3722	17.7569	14.8643	0.000109799	0.490077	0.166968	0.141182	0.295828	0.270042	0.241635
1267	Pde4b	4.64635e-05	0.233782	19.1219	20.7018	12.165	16.6671	14.9935	19.5861	6.07489e-05	0.385964	-0.612057	-0.721107	-0.187699	-0.29675	-0.364184
1268	Mier1	7.10282e-12	0.00991511	4.8903	4.46793	6.37229	8.0045	7.39776	4.76619	1.24599e-11	0.0475275	0.323771	0.431118	0.612304	0.719651	0.542388
1269	Prkaa2	1.55434e-10	0.21209	90.2356	100.552	93.3186	109.739	103.635	93.2671	2.54635e-10	0.361486	0.0479449	-0.106599	0.279496	0.124952	0.150542
1270	Plpp3	0.569591	0.555368	11.2857	11.7932	12.2917	12.0803	12.1589	11.4348	0.57807	0.691634	0.113543	0.0551471	0.0904171	0.0320209	0.0816502
1271	Usp24	7.38562e-06	0.414668	9.96224	12.0165	8.08616	10.9471	9.88361	10.5659	1.00032e-05	0.571847	-0.2708	-0.518601	0.124117	-0.123684	-0.087722
1272	Ttc4	0.113994	0.939075	2.04651	2.64602	1.87483	2.43793	2.22861	2.22268	0.122489	0.960144	-0.0836815	-0.342849	0.174385	-0.0847818	0.00265228
1273	Ssbp3	1.81994e-11	1.52815e-07	6.92558	5.31547	6.56457	9.79731	8.59561	6.45244	3.12565e-11	2.10047e-05	-0.0672596	0.260367	0.446083	0.77371	0.364663
1274	Mrpl37	0.501867	0.176977	8.42768	8.08797	8.01304	8.83998	8.53258	8.32785	0.512144	0.319804	-0.0648891	-0.0119438	0.0617527	0.114698	0.0313224
1275	Tmem59	3.67541e-36	0.00907331	19.7192	21.6627	27.2991	33.9195	31.4585	20.2903	3.64631e-35	0.0451652	0.449786	0.320437	0.753063	0.623714	0.608399
1276	Yipf1	5.70998e-07	0.70538	0.323739	0.451141	0.950685	1.18407	1.09732	0.361177	8.13856e-07	0.80515	0.559362	0.426793	0.722403	0.589834	0.623689
1277	Ndc1	1.7364e-08	0.0082215	1.28246	0.752435	1.94062	2.61397	2.36367	1.12671	2.62415e-08	0.0424711	0.36553	0.746758	0.662997	1.04423	0.661414
1278	Magoh	7.66716e-11	0.687305	6.38104	6.53675	9.44199	9.25649	9.32544	6.4268	1.27293e-10	0.791672	0.500501	0.470381	0.474641	0.444521	0.475391
1279	Czib	1.9494e-06	0.160704	6.56264	7.37177	9.05358	8.71057	8.83808	6.80041	2.71761e-06	0.299807	0.410746	0.264105	0.360666	0.214025	0.334826
1280	Cpt2	0.093938	0.0359147	6.13785	4.99626	5.36189	5.6912	5.56879	5.80238	0.101759	0.108573	-0.166034	0.0853919	-0.0932244	0.158201	-0.0504133
1281	Scp2	8.50261e-20	0.757054	9.50076	8.18456	14.5753	12.9567	13.5584	9.11398	3.54151e-19	0.841588	0.568771	0.761982	0.410466	0.603677	0.525501
1282	Zyg11b	0.176892	0.766984	5.90254	6.65065	5.9658	6.98871	6.60846	6.12238	0.187031	0.847871	0.0131613	-0.135293	0.210835	0.0623806	0.0952463
1283	Coa7	0.0447661	0.241069	5.34613	5.34625	5.71307	6.91053	6.4654	5.34616	0.0497712	0.394469	0.0810966	0.0810689	0.317898	0.31787	0.234335
1284	Zfyve9	0.000634946	0.728524	10.1765	11.8384	10.4205	12.4373	11.6876	10.6649	0.000788777	0.821333	0.0311654	-0.168841	0.265778	0.065771	0.121251
1285	Btf3l4	2.47306e-10	0.174239	4.90476	5.63167	7.30894	7.15774	7.21394	5.11837	4.00749e-10	0.316125	0.492786	0.325292	0.466292	0.298798	0.424929
1286	Txndc12	0.84601	0.384005	4.85917	5.14747	5.06161	4.7546	4.86872	4.94389	0.849599	0.544567	0.0490055	-0.020292	-0.0259805	-0.095278	-0.0183604
1287	Kti12	0.237468	0.480859	1.0936	1.31941	0.743711	1.24261	1.05715	1.15995	0.248795	0.629179	-0.263823	-0.411594	0.0991916	-0.0485794	-0.0703514
1288	Nrd1	0.000393961	0.0207269	21.5581	22.5676	18.2035	22.9206	21.1671	21.8548	0.000494525	0.0760044	-0.232279	-0.295436	0.0846088	0.021452	-0.0440721
1289	Osbpl9	2.08868e-11	0.111226	8.19215	8.24877	12.0289	10.6801	11.1815	8.20879	3.5764e-11	0.234946	0.503247	0.494387	0.345582	0.336722	0.403611
1290	Eps15	4.07129e-10	0.468647	13.7179	16.5292	15.9584	19.8719	18.4171	14.544	6.53401e-10	0.619579	0.204422	-0.0477633	0.503987	0.251803	0.320968
1291	Rnf11	0.00107543	0.0117104	22.6576	22.0044	22.3996	25.6295	24.4288	22.4656	0.00132001	0.0528052	-0.0158209	0.024571	0.170722	0.211114	0.115915
1292	Cdkn2c	3.1462e-09	0.174639	1.09262	1.50688	2.02916	3.20266	2.76644	1.21436	4.88377e-09	0.316654	0.533605	0.273021	1.00599	0.745408	0.766313
1293	Faf1	0.0640649	0.295198	8.83277	9.10752	7.57473	8.66223	8.25798	8.91351	0.0703558	0.455491	-0.197507	-0.237265	-0.0252413	-0.0649999	-0.0986984
1294	Efcab14	5.6468e-07	0.926838	5.27595	5.72394	3.34848	3.73325	3.59022	5.4076	8.04986e-07	0.953351	-0.529323	-0.628797	-0.407005	-0.506478	-0.481221
1295	Atpaf1	8.55068e-09	0.300555	4.21308	3.94129	2.35046	2.62982	2.52598	4.13321	1.30613e-08	0.461148	-0.637775	-0.560526	-0.522238	-0.444989	-0.541839
1296	Mknk1	9.92862e-17	0.0233998	8.15172	8.4872	10.848	13.678	12.626	8.25031	3.12451e-16	0.0819349	0.372533	0.320595	0.68154	0.629602	0.558792
1297	Uqcrh	2.39881e-18	0.308324	205.406	196.923	286.361	262.175	271.165	202.913	9.04943e-18	0.469326	0.477375	0.537925	0.350535	0.411085	0.416528
1298	Lrrc41	0.0538799	0.220481	5.2058	5.36522	3.73616	4.93021	4.48635	5.25265	0.0595158	0.371039	-0.389898	-0.426492	-0.0655335	-0.102128	-0.18862
1299	Pomgnt1	1.00733e-18	0.737635	0.403217	0.444138	1.98159	1.91194	1.93783	0.415242	3.93422e-18	0.827558	1.08734	1.04587	1.05324	1.01177	1.0537
1300	Mast2	0.0993721	0.198379	3.41797	3.24576	2.4673	3.02636	2.81854	3.36737	0.1074	0.345372	-0.349572	-0.292213	-0.133907	-0.0765478	-0.193742
1301	Akr1a1	9.10172e-50	0.243893	15.9464	19.7804	33.1617	39.9659	37.4366	17.073	1.96367e-48	0.397031	1.01141	0.71716	1.27345	0.9792	1.08864
1302	Prdx1	2.39883e-50	6.96874e-08	160.798	167.293	271.04	222.037	240.253	162.706	5.39389e-49	1.23724e-05	0.749629	0.692845	0.463094	0.406311	0.559437
1303	Urod	0.0201392	0.0207189	8.98634	8.59113	8.41971	10.2755	9.58563	8.8702	0.0229601	0.0760044	-0.0842728	-0.0260176	0.175159	0.233414	0.100955
1304	Hectd3	0.00133127	0.971981	1.56634	1.3268	2.64622	2.42607	2.5079	1.49595	0.00162584	0.982589	0.506689	0.648053	0.416839	0.558204	0.491019
1305	Rnf220	0.00150618	0.0463749	7.64889	8.32321	6.4471	8.98237	8.03994	7.84704	0.00183288	0.130088	-0.215836	-0.324148	0.206869	0.098557	0.0311184
1306	Eri3	0.000232053	0.0880748	12.1393	13.0952	12.0031	15.109	13.9545	12.4202	0.000294586	0.20128	-0.0150384	-0.116349	0.293981	0.19267	0.15617
1307	Atp6v0b	1.43624e-12	0.23166	17.7705	19.5531	21.8903	25.8392	24.3713	18.2944	2.63728e-12	0.383862	0.286269	0.155379	0.51587	0.384981	0.395016
1308	Ipo13	0.00030496	0.0615263	12.6927	13.3052	12.6186	15.4514	14.3984	12.8727	0.000384847	0.158647	-0.00783315	-0.0709587	0.264802	0.201676	0.15053
1309	St3gal3	2.49033e-16	0.447552	0.303687	0.397671	1.22626	1.51452	1.40737	0.331305	7.29549e-16	0.601204	0.772023	0.671596	0.947687	0.84726	0.854615
1310	Med8	2.74645e-07	0.497987	0.339984	0.476356	0.936027	1.26866	1.14501	0.380058	3.96363e-07	0.643436	0.530884	0.391059	0.759628	0.619803	0.636258
1311	Tie1	0.042682	0.0764744	8.06004	7.02364	8.3346	9.01676	8.76318	7.75548	0.0475162	0.182553	0.0430711	0.218332	0.144826	0.320086	0.157164
1312	Ebna1bp2	9.47524e-05	0.103698	4.76526	5.86083	6.7553	6.56918	6.63837	5.08721	0.000122345	0.223951	0.427797	0.176799	0.39275	0.141752	0.327483
1313	Zfp691	0.0102152	0.582352	1.35317	1.33012	0.605899	0.801325	0.72868	1.3464	0.0118537	0.712732	-0.551224	-0.537024	-0.385547	-0.371347	-0.440776
1314	AU022252	0.135942	0.708168	4.73254	5.34266	4.69194	5.56431	5.24003	4.91183	0.14523	0.806819	-0.0102541	-0.156167	0.195469	0.0495552	0.0779471
1315	Ybx1	0.00207467	0.00141719	41.5194	35.3739	33.6286	38.1574	36.4739	39.7135	0.00250892	0.0154047	-0.296157	-0.0709405	-0.118834	0.106382	-0.119619
1316	Foxj3	0.01533	0.17118	6.57742	7.17122	6.03427	7.74362	7.10821	6.75191	0.0176139	0.312643	-0.107304	-0.21615	0.206525	0.0976788	0.0648312
1317	Foxo6	1.76154e-20	0.976766	0.283103	0.349414	1.73113	1.78864	1.76726	0.302589	7.60476e-20	0.985205	1.08986	1.01716	1.11993	1.04723	1.08708
1318	Scmh1	5.89727e-05	0.253689	1.40915	1.55599	1.98704	2.68326	2.42445	1.4523	7.67158e-05	0.408683	0.310191	0.224837	0.612457	0.527103	0.481738
1319	Ctps	7.95915e-07	0.528981	4.4399	4.87738	5.73892	6.60883	6.28546	4.56846	1.12896e-06	0.669963	0.308937	0.197343	0.484094	0.3725	0.387741
1320	Cited4	3.97797e-58	0.0014825	2.21665	2.44479	7.15555	9.72889	8.77231	2.28369	1.41251e-56	0.0157726	1.34222	1.24336	1.73787	1.63901	1.57338
1321	Kcnq4	4.78486e-50	0.00757973	0.422343	0.619122	2.92507	4.21129	3.73317	0.480169	1.05639e-48	0.0403715	1.46445	1.27751	1.87337	1.68643	1.67704
1322	Nfyc	3.31787e-11	0.122524	6.17596	7.71259	9.09614	9.37149	9.26913	6.62752	5.60898e-11	0.250636	0.492559	0.212631	0.531378	0.251449	0.429029
1323	Smap2	1.35235e-30	2.41172e-06	3.65863	3.02865	5.48242	7.88746	6.99344	3.4735	9.54031e-30	0.000167095	0.476628	0.686237	0.931867	1.14148	0.837413
1324	Zmpste24	2.78764e-07	0.647527	0.402468	0.542149	1.19502	1.49423	1.38301	0.443515	4.02171e-07	0.762502	0.646266	0.509292	0.830627	0.693653	0.723197
1325	Pabpc4	5.22817e-07	0.023657	19.5241	18.9453	14.9089	17.1717	16.3305	19.354	7.46056e-07	0.0824946	-0.367485	-0.326214	-0.17563	-0.134359	-0.231998
1326	Macf1	3.40044e-49	0.00218107	7.06144	7.89271	13.4535	17.8016	16.1853	7.30572	7.12003e-48	0.0191029	0.842306	0.70072	1.22174	1.08016	1.049
1327	Ndufs5	0.137634	0.849563	19.2673	17.9805	20.515	18.9735	19.5465	18.8892	0.146946	0.90219	0.086188	0.180828	-0.0210672	0.0735725	0.0469119
1328	Akirin1	1.34983e-08	0.732676	2.98017	3.28546	4.76122	4.86639	4.82729	3.06989	2.04976e-08	0.824708	0.533543	0.426924	0.559641	0.453022	0.517838
1329	Mycbp	0.0452837	0.068845	1.43839	1.9881	2.30878	1.96368	2.09196	1.59993	0.050327	0.16966	0.440372	0.147075	0.281459	-0.0118386	0.250052
1330	Rragc	1.02507e-18	0.00290284	7.21458	7.36023	9.43691	12.6052	11.4275	7.25738	3.99985e-18	0.0224563	0.345436	0.32008	0.727903	0.702547	0.589778
1331	Utp11	0.534017	0.8922	5.61468	6.16258	5.12399	5.55475	5.39463	5.77569	0.543757	0.930936	-0.111199	-0.226007	-0.0131308	-0.127939	-0.0835074
1332	1110065P20Rik	0.0285672	0.861482	5.06756	5.24886	4.01155	4.3096	4.1988	5.12084	0.0322535	0.911541	-0.275861	-0.318337	-0.192515	-0.234991	-0.23555
1333	Gnl2	1.85677e-06	0.537012	0.263505	0.462993	0.690933	1.04522	0.913519	0.322126	2.59102e-06	0.676584	0.420389	0.208897	0.694822	0.483329	0.533368
1334	Meaf6	4.6588e-09	0.0625924	1.92384	2.13326	2.86037	4.26188	3.7409	1.98538	7.17944e-09	0.159858	0.400873	0.301072	0.847714	0.747914	0.667245
1335	Mrps15	0.467527	0.30013	8.36741	8.45688	7.73877	8.73849	8.36686	8.3937	0.478435	0.460766	-0.100221	-0.113933	0.0560465	0.0423338	-0.00412799
1336	Lsm10	2.28835e-16	0.682188	0.36717	0.67864	2.16402	2.30278	2.2512	0.458699	6.75254e-16	0.788286	1.21057	0.914466	1.27249	0.976389	1.15629
1337	Stk40	9.89044e-29	0.681736	6.63602	7.15808	2.56208	2.79881	2.71081	6.78943	6.31832e-28	0.788201	-1.1001	-1.19551	-1.00727	-1.10268	-1.06978
1338	Thrap3	1.64944e-05	0.0326153	5.96461	5.35796	6.78829	7.86236	7.4631	5.78634	2.20012e-05	0.102054	0.161265	0.292743	0.347649	0.479128	0.318553
1339	Map7d1	2.09975e-48	3.0375e-10	15.4993	14.545	21.2192	31.6728	27.7869	15.2189	4.19066e-47	1.12546e-07	0.429405	0.515355	0.985687	1.07164	0.827741
1340	Trappc3	0.35997	0.246818	2.22354	2.21009	1.64708	2.23076	2.01379	2.21958	0.371568	0.400111	-0.28424	-0.278209	0.00323188	0.00926281	-0.0952931
1341	5730409E04Rik	3.76045e-24	0.666188	0.395545	0.770586	2.56109	2.75815	2.6849	0.505754	1.91437e-23	0.776854	1.35149	1.00809	1.42919	1.0858	1.29114
1342	Psmb2	0.0260949	0.0360894	23.4357	26.6636	26.7323	25.7736	26.13	24.3842	0.0295798	0.108907	0.182578	0.0035807	0.131822	-0.0471755	0.0959558
1343	Ncdn	3.19931e-24	0.0418684	1.52115	2.08603	3.57999	5.40065	4.72386	1.68715	1.63456e-23	0.121568	0.86126	0.56959	1.34414	1.05247	1.09091
1344	AU040320	9.89142e-05	0.335271	1.35958	1.15068	2.09167	2.2994	2.22218	1.2982	0.000127642	0.495092	0.389855	0.523594	0.48367	0.61741	0.487536
1345	Sfpq	1.09414e-26	0.000553073	6.4121	6.16666	10.0058	13.7891	12.3827	6.33998	6.29118e-26	0.00860088	0.570313	0.618895	0.996576	1.04516	0.866525
1346	Smim12	0.000361233	0.738094	1.30391	1.49188	1.98548	2.3165	2.19345	1.35915	0.000454045	0.827839	0.373882	0.260728	0.525578	0.412423	0.436851
1347	Zfp362	2.14485e-10	0.00244318	8.38783	7.69249	9.78705	12.6646	11.595	8.18349	3.49025e-10	0.0202522	0.200438	0.31146	0.541585	0.652607	0.455732
1348	Ak2	3.16298e-27	0.131027	2.83299	3.74389	6.55585	8.8293	7.9842	3.10067	1.87187e-26	0.261993	0.979125	0.671523	1.35862	1.05102	1.13153
1349	Rnf19b	3.56748e-10	0.130223	5.51149	5.00892	7.66317	8.48093	8.17695	5.36381	5.73516e-10	0.260753	0.411908	0.52779	0.542041	0.657923	0.528125
1350	Fndc5	1.31642e-20	7.41229e-10	15.7491	10.5686	9.55569	11.0932	10.5216	14.2268	5.72084e-20	2.5267e-07	-0.666062	-0.132199	-0.469891	0.0639722	-0.402263
1351	Yars	0.0278164	0.235216	3.31792	3.38667	2.13085	2.9326	2.63457	3.33812	0.0314517	0.387869	-0.463785	-0.486573	-0.134853	-0.157641	-0.255287
1352	Rbbp4	2.89723e-08	0.0849666	4.51591	4.53108	5.8676	7.30557	6.77103	4.52037	4.34228e-08	0.196202	0.316207	0.312245	0.590481	0.586519	0.493343
1353	Zbtb8os	5.07705e-31	0.847372	1.40882	1.72932	7.19947	7.33909	7.28719	1.503	3.66356e-30	0.901198	1.76721	1.58699	1.79156	1.61135	1.72722
1354	Eif3i	1.42395e-07	0.0605866	10.5177	12.1781	13.7834	13.5399	13.6304	11.0056	2.07825e-07	0.15688	0.360123	0.165831	0.336168	0.141876	0.285261
1355	Tmem234	0.115028	0.760592	7.26496	8.04996	6.25155	7.31479	6.91956	7.49564	0.123553	0.843664	-0.188719	-0.319622	0.00867337	-0.122231	-0.101303
1356	Ccdc28b	2.08557e-14	0.680748	0.321973	0.55693	1.35023	1.47665	1.42966	0.391018	4.56192e-14	0.787528	0.83011	0.594099	0.905699	0.669688	0.804613
1357	Kpna6	0.00294588	0.219546	3.41532	3.19733	2.11721	2.59169	2.41531	3.35126	0.00353339	0.369758	-0.502263	-0.429219	-0.297853	-0.224809	-0.349416
1358	Khdrbs1	1.23954e-16	0.00582785	4.76551	4.43222	6.60371	8.35546	7.70429	4.66757	3.83703e-16	0.0342045	0.399257	0.485163	0.698361	0.784267	0.618997
1359	Ptp4a2	9.51829e-30	0.0339877	300.171	297.014	438.628	500.015	477.196	299.244	6.4428e-29	0.104905	0.545698	0.560901	0.73427	0.749473	0.671468
1360	Pef1	0.000182629	0.450097	12.3953	14.137	14.4658	15.3257	15.0061	12.9071	0.00023278	0.603197	0.207361	0.0309997	0.285424	0.109063	0.202798
1361	Tinagl1	2.06437e-25	0.00523224	5.46367	4.16854	1.67736	2.06539	1.92115	5.08309	1.12413e-24	0.0321176	-1.27154	-0.948944	-1.07628	-0.753687	-1.05827
1362	Serinc2	4.29028e-16	0.381786	7.6954	10.8296	10.682	12.9248	12.0911	8.6164	1.21106e-15	0.542281	0.425967	-0.0181059	0.679335	0.235262	0.445019
1363	Fabp3	5.86627e-54	0.000807133	134.798	93.0079	78.9929	61.4331	67.9606	122.518	1.61787e-52	0.0111301	-0.763519	-0.23291	-1.12108	-0.59047	-0.840873
1364	Zcchc17	0.159318	0.0602424	6.24595	6.02242	5.45558	6.73382	6.25866	6.18026	0.169037	0.156377	-0.166627	-0.12142	0.0940072	0.139214	0.0156679
1365	Pum1	0.00790282	0.127833	10.7239	11.0998	8.08783	10.3405	9.50311	10.8344	0.00923206	0.258041	-0.36745	-0.41297	-0.047975	-0.0934952	-0.172167
1366	Srsf4	4.44861e-25	8.55123e-05	5.85926	5.58577	8.15347	11.5373	10.2794	5.77889	2.37538e-24	0.00245366	0.416266	0.474966	0.870101	0.928801	0.734573
1367	Epb41	0.149396	0.0240506	5.97915	5.15817	4.92482	5.95209	5.57022	5.7379	0.159045	0.0833341	-0.236279	-0.0557314	-0.00560428	0.174944	-0.0363556
1368	Ythdf2	2.32195e-16	0.23904	0.376833	0.606594	1.41005	2.03164	1.80058	0.44435	6.84457e-16	0.392162	0.807711	0.58506	1.13875	0.916096	0.955306
1369	Taf12	0.0806752	0.734177	6.60765	7.20496	7.56954	7.86914	7.75777	6.78318	0.0877827	0.825426	0.171766	0.0627206	0.221343	0.112297	0.170204
1370	Snhg3	1.43934e-42	0.00582243	1.12774	2.07495	6.04513	5.39654	5.63764	1.40609	2.11484e-41	0.0341963	1.7273	1.19606	1.58797	1.05673	1.46398
1371	Phactr4	6.05525e-20	0.12134	0.351687	0.410077	1.52941	2.0941	1.88419	0.368845	2.53951e-19	0.24893	0.904039	0.843026	1.19476	1.13375	1.07521
1372	Atpif1	1.32064e-53	0.117347	1.42936	1.8343	8.38167	7.63014	7.9095	1.54836	3.56156e-52	0.244149	1.94927	1.72685	1.8288	1.60639	1.80578
1373	Dnajc8	2.40002e-10	0.640861	20.8003	21.7842	26.9266	27.0765	27.0208	21.0894	3.8921e-10	0.757879	0.357291	0.293607	0.365016	0.301333	0.343142
1374	Rpa2	0.216223	0.449485	3.54764	4.40817	3.50445	3.88236	3.74188	3.80051	0.227236	0.602671	-0.0137669	-0.26379	0.10246	-0.147563	-0.0177306
1375	Stx12	5.59658e-12	0.150422	10.5182	12.0122	15.2365	15.0289	15.1061	10.9573	9.88683e-12	0.287549	0.495323	0.319375	0.476754	0.300806	0.429718
1376	Ahdc1	2.19674e-06	0.147103	0.29097	0.376537	0.594738	1.0342	0.870838	0.316114	3.05643e-06	0.283331	0.304865	0.212277	0.656004	0.563416	0.5074
1377	Wasf2	1.3518e-25	0.00242838	0.322521	0.520043	1.58789	3.10335	2.54001	0.380565	7.39889e-25	0.0202096	0.968486	0.767664	1.63351	1.43269	1.3585
1378	Tmem222	2.03831e-18	0.556444	0.295117	1.02419	1.83155	2.33641	2.14874	0.509361	7.75123e-18	0.692467	1.12851	0.484248	1.36521	0.720952	1.06084
1379	Wdtc1	0.00695399	0.00252	10.6755	10.057	8.85664	11.3468	10.4211	10.4938	0.00815381	0.0205901	-0.244319	-0.165787	0.0806471	0.159179	-0.00914547
1380	Nudc	1.25614e-24	0.144872	1.66012	2.46403	3.76409	5.42239	4.80595	1.89635	6.57546e-24	0.280997	0.840712	0.459749	1.27162	0.890659	1.0033
1381	Zdhhc18	2.99193e-17	0.037147	4.44746	5.84325	5.68139	8.75357	7.61155	4.85762	1.00979e-16	0.111193	0.294566	-0.0345346	0.840348	0.511248	0.555958
1382	Arid1a	1.20204e-05	0.00595507	8.26291	8.24688	8.10373	11.4023	10.1761	8.2582	1.61396e-05	0.0346098	-0.0250073	-0.0225094	0.421071	0.423569	0.271618
1383	Hmgn2	2.57949e-83	0.00271047	0.449878	0.645086	8.9933	11.8495	10.7878	0.507242	4.99601e-81	0.0215875	2.78503	2.6028	3.14771	2.96548	2.96731
1384	Sh3bgrl3	2.84777e-45	0.0107246	1.19559	1.60224	17.9203	25.5901	22.739	1.31508	4.81521e-44	0.0499425	3.10726	2.86211	3.59821	3.35306	3.35812
1385	Cep85	3.90928e-05	0.0124325	4.16661	3.8699	4.4297	5.87858	5.33999	4.07942	5.12852e-05	0.0548394	0.0716565	0.15698	0.412894	0.498217	0.319818
1386	Cnksr1	0.00036365	0.506029	12.9503	15.2401	9.78269	13.1161	11.877	13.6232	0.000456949	0.649945	-0.371577	-0.59084	0.0170442	-0.202218	-0.183463
1387	Trim63	9.18725e-10	0.762366	64.9193	72.5949	25.7375	29.7366	28.25	67.1749	1.45571e-09	0.844519	-1.30183	-1.46074	-1.10074	-1.25965	-1.2208
1388	Extl1	1.1853e-15	0.322996	0.378659	0.478634	1.31815	1.69628	1.55572	0.408038	3.10422e-15	0.484096	0.749708	0.648709	0.967702	0.866703	0.860042
1389	Mtfr1l	1.80263e-05	0.104387	34.8076	34.796	36.8821	39.9496	38.8093	34.8042	2.40181e-05	0.225098	0.0812499	0.0817148	0.193583	0.194048	0.152976
1390	Selenon	1.14749e-55	0.000842988	0.428401	0.573243	4.75338	7.1758	6.27532	0.470965	3.45546e-54	0.0114304	2.01001	1.87067	2.51696	2.37762	2.30625
1391	Maco1	2.17011e-07	0.268385	9.81806	10.6459	12.0749	14.4404	13.5611	10.0613	3.14571e-07	0.42568	0.273363	0.166985	0.513271	0.406893	0.396597
1392	Tmem50a	6.19157e-44	0.0128921	15.6946	16.7057	29.4853	36.5775	33.9411	15.9917	9.89955e-43	0.0559688	0.868734	0.783897	1.17049	1.08565	1.04009
1393	Rsrp1	8.66129e-94	6.64343e-12	24.764	21.5568	62.6527	92.5586	81.4417	23.8216	2.46038e-91	4.35502e-09	1.30486	1.49666	1.86051	2.05231	1.73178
1394	Syf2	0.107286	0.308187	7.27418	8.17412	8.46223	8.41442	8.43219	7.53863	0.115601	0.469326	0.193565	0.0446111	0.186257	0.0373029	0.143588
1395	Clic4	8.49379e-23	0.0233717	1.01107	0.952846	3.61615	5.228	4.62883	0.993961	4.09412e-22	0.0818971	1.19873	1.24111	1.6308	1.67319	1.4972
1396	Srsf10	1.78824e-08	0.0306283	1.4248	1.20101	2.27591	3.26137	2.89505	1.35904	2.70011e-08	0.0982263	0.434028	0.573731	0.81345	0.953153	0.723442
1397	Pnrc2	1.29561e-17	0.0975353	6.43754	6.25815	9.16965	10.3276	9.89714	6.38483	4.54932e-17	0.214416	0.451373	0.486596	0.606941	0.642163	0.561314
1398	Fuca1	7.48566e-29	0.282621	0.331185	0.670033	3.09808	4.04293	3.6917	0.430758	4.81455e-28	0.441279	1.62224	1.29507	1.92155	1.59439	1.71333
1399	Hmgcl	3.67618e-18	0.00011855	4.47828	3.6349	5.96986	7.95973	7.22004	4.23044	1.36567e-17	0.00310855	0.347407	0.588591	0.709733	0.950916	0.652212
1400	Lypla2	7.5704e-11	0.0034451	10.1255	10.4629	11.4369	16.5115	14.6251	10.2246	1.25809e-10	0.0249375	0.160768	0.117664	0.654437	0.611334	0.477204
1401	Pithd1	0.343118	0.664917	2.0492	2.26819	2.10535	2.52985	2.37205	2.11355	0.354861	0.776025	0.0263216	-0.0737361	0.211176	0.111118	0.115065
1402	Eloa	4.74847e-08	0.267281	7.5823	8.66181	8.48343	10.4579	9.72394	7.89952	7.06838e-08	0.424403	0.144045	-0.0268836	0.416907	0.245979	0.269035
1403	Id3	3.76495e-25	0.287667	0.50122	0.893529	2.83793	3.79722	3.44062	0.616504	2.02301e-24	0.446946	1.35419	1.01925	1.67606	1.34112	1.45789
1404	Tcea3	2.20412e-19	0.0863237	22.2993	22.4475	28.2384	31.3476	30.1918	22.3428	8.95732e-19	0.198556	0.327575	0.318429	0.47337	0.464224	0.418185
1405	Zfp46	2.95525e-15	0.367487	4.68483	4.62764	7.38219	8.01097	7.77724	4.66803	7.30412e-15	0.527848	0.56021	0.574798	0.664565	0.679153	0.630921
1406	Hnrnpr	2.87279e-34	0.65092	1.26533	1.71822	4.78371	5.50521	5.23701	1.39841	2.50327e-33	0.764912	1.35228	1.08933	1.52188	1.25893	1.37877
1407	C1qb	1.49396e-52	0.00638994	6.6587	6.78674	63.605	87.2663	78.4707	6.69633	3.7556e-51	0.0361843	3.07647	3.05255	3.52669	3.50277	3.36818
1408	C1qc	1.00411e-49	0.00205774	3.323	3.60867	21.4273	31.0741	27.4881	3.40695	2.15542e-48	0.0185764	2.37515	2.28283	2.89131	2.79899	2.69251
1409	Wnt4	0.000218188	0.119022	0.345199	0.348523	0.53272	0.885251	0.754205	0.346176	0.000277232	0.24619	0.188274	0.184713	0.486937	0.483376	0.381951
1410	Cdc42	1.11093e-61	0.137962	108.619	111.161	206.618	226.391	219.041	109.366	4.93089e-60	0.271652	0.921432	0.888365	1.05267	1.0196	0.995473
1411	Hspg2	1.00851e-50	7.74174e-06	1.05292	0.688002	4.48337	7.06443	6.10497	0.945688	2.30417e-49	0.000412344	1.41738	1.69975	1.97389	2.25626	1.86855
1412	Usp48	2.03051e-12	0.289414	1.32246	1.32932	2.90422	3.47992	3.26591	1.32448	3.68956e-12	0.448924	0.749378	0.745122	0.947818	0.943562	0.875948
1413	Ece1	0.0418485	0.217754	1.76971	2.11373	1.3641	2.32987	1.97087	1.87081	0.0466248	0.368162	-0.228447	-0.397356	0.265729	0.09682	0.049427
1414	Eif4g3	3.29763e-05	0.0158589	12.7723	12.4437	13.2465	15.9619	14.9525	12.6758	4.34148e-05	0.0639048	0.0488293	0.08367	0.300525	0.335365	0.22216
1415	Hp1bp3	2.40437e-07	0.00053279	7.25301	6.68967	7.30856	9.61775	8.75936	7.08746	3.47879e-07	0.00845519	0.00967838	0.111678	0.363487	0.465486	0.271099
1416	Ddost	1.69139e-39	0.00485523	1.94889	3.14707	5.25661	8.69907	7.41941	2.30099	2.0621e-38	0.0306037	1.08521	0.59329	1.71767	1.22575	1.35082
1417	Pink1	1.36259e-08	0.225071	28.4562	30.3731	30.8404	34.8665	33.3699	29.0195	2.06877e-08	0.376048	0.112284	0.0213309	0.284064	0.19311	0.195244
1418	Mul1	0.000110455	0.0427026	2.52465	2.16189	3.05367	3.99434	3.64467	2.41805	0.000142319	0.123235	0.201749	0.35844	0.502813	0.659504	0.442401
1419	Camk2n1	0.818456	0.841767	1.86055	1.98677	1.91112	2.14044	2.05519	1.89764	0.822606	0.898039	0.0252849	-0.0370102	0.134674	0.0723789	0.0763863
1420	Nbl1	2.05797e-35	0.13131	2.50657	2.76581	6.66681	8.07159	7.5494	2.58275	1.93576e-34	0.26237	1.12857	1.02566	1.3713	1.26839	1.25476
1421	Micos10	1.11044e-06	0.117927	32.2051	32.3267	39.3023	36.1656	37.3316	32.2408	1.56572e-06	0.244757	0.279458	0.274187	0.162563	0.157292	0.205578
1422	Capzb	7.55402e-50	0.000563761	187.181	203.57	233.304	283.706	264.97	191.997	1.65489e-48	0.00870357	0.316261	0.195785	0.597351	0.476875	0.462685
1423	Akr7a5	2.72039e-16	0.630599	0.337199	0.437252	1.56761	1.53461	1.54688	0.366601	7.93128e-16	0.750134	0.941214	0.837115	0.922552	0.818453	0.89814
1424	Mrto4	0.0233461	0.602465	1.93307	2.43511	2.02078	2.78698	2.50217	2.0806	0.0265274	0.727397	0.0425124	-0.185435	0.368638	0.140691	0.185036
1425	Emc1	3.62706e-21	0.0130686	6.90395	7.37107	10.0426	13.2588	12.0633	7.04122	1.62597e-20	0.0563617	0.482439	0.3996	0.851208	0.768369	0.70003
1426	Ubr4	6.91534e-10	0.079419	23.4698	27.533	24.2155	32.3927	29.353	24.6638	1.10072e-09	0.187315	0.0433133	-0.178319	0.448535	0.226902	0.242108
1427	Aldh4a1	1.09232e-11	7.10193e-05	12.9265	12.1549	13.48	17.9726	16.3026	12.6997	1.89472e-11	0.00210148	0.056237	0.138468	0.446087	0.528318	0.33684
1428	Arhgef10l	0.0222416	0.261053	3.61605	3.8912	2.5124	3.4607	3.10819	3.69691	0.0253027	0.416765	-0.394204	-0.477732	-0.0493899	-0.132918	-0.193209
1429	Padi2	0.342772	0.0851825	8.59715	7.6517	8.10942	8.661	8.45597	8.31932	0.354546	0.196621	-0.0752469	0.0743761	0.00956676	0.15919	0.0209999
1430	Sdhb	3.0176e-12	0.581411	112.307	104.522	100.119	89.5127	93.4555	110.019	5.42189e-12	0.712099	-0.164181	-0.0614802	-0.324048	-0.221347	-0.233105
1431	Szrd1	4.91746e-09	0.880946	3.70835	3.63731	5.87794	5.91369	5.9004	3.68748	7.56847e-09	0.922854	0.546755	0.568687	0.554234	0.576167	0.557869
1432	Fbxo42	1.92845e-06	0.826677	4.10678	4.88552	5.40837	6.34335	5.99579	4.33562	2.68885e-06	0.888504	0.327542	0.122786	0.524024	0.319268	0.39083
1433	Hspb7	6.02498e-15	0.0408501	83.2953	78.3404	54.9493	61.7166	59.201	81.8393	1.42112e-14	0.119285	-0.591332	-0.503935	-0.426604	-0.339207	-0.460526
1434	Zbtb17	0.0130303	0.782896	1.08948	1.32688	0.49649	0.82782	0.704656	1.15924	0.01501	0.857244	-0.481559	-0.636812	-0.193018	-0.348271	-0.341043
1435	Spen	0.189861	0.0811003	7.39573	7.06949	5.64972	7.80622	7.00459	7.29986	0.200445	0.190082	-0.336362	-0.279183	0.0688671	0.126046	-0.0522597
1436	Ddi2	1.0549e-10	0.152159	12.523	14.9219	15.022	20.0021	18.1509	13.2279	1.74155e-10	0.289859	0.244638	0.00904698	0.635118	0.399527	0.428684
1437	Lrrc38	5.14365e-06	0.611752	1.05376	1.46825	1.68873	2.31348	2.08125	1.17556	7.0247e-06	0.735563	0.388658	0.123437	0.690083	0.424862	0.502127
1438	Dhrs3	1.78862e-29	0.00283104	8.70741	8.3609	13.8573	17.4738	16.1294	8.60558	1.19176e-28	0.0221894	0.61401	0.666448	0.928322	0.98076	0.834532
1439	Vps13d	0.221351	0.143189	6.5966	6.99092	7.66734	6.96436	7.22568	6.71248	0.232395	0.27898	0.190235	0.117227	0.0682045	-0.00480325	0.0929404
1440	Zfp979	0.132084	0.19649	0.357048	0.332988	0.364574	0.583399	0.502056	0.349978	0.14125	0.343696	0.00797978	0.0337868	0.222554	0.248361	0.154003
1441	Mfn2	1.70071e-16	3.931e-05	98.7968	100.9	99.5399	117.666	110.928	99.4147	5.13407e-16	0.00142527	0.0107027	-0.0193799	0.249837	0.219754	0.156598
1442	Plod1	1.69944e-16	0.0729335	1.35379	1.48193	3.33577	4.6882	4.18547	1.39145	5.13205e-16	0.176724	0.881302	0.804827	1.27299	1.19651	1.11659
1443	Fbxo6	1.43369e-08	0.927407	2.59683	2.73647	1.17615	1.27337	1.23723	2.63786	2.17478e-08	0.953609	-0.724946	-0.779898	-0.661894	-0.716846	-0.701378
1444	Ubiad1	0.151089	0.479331	1.3383	1.22122	1.61016	1.77388	1.71302	1.3039	0.160746	0.628053	0.158676	0.232783	0.246444	0.320551	0.235823
1445	Mtor	0.0101261	0.345668	3.63629	4.03468	2.94102	2.76487	2.83035	3.75336	0.0117536	0.505887	-0.234402	-0.353329	-0.300371	-0.419299	-0.311472
1446	Exosc10	2.67348e-05	0.81386	0.300807	0.427603	0.827726	1.01806	0.947306	0.338067	3.53451e-05	0.879386	0.490643	0.356455	0.633561	0.499372	0.541329
1447	Srm	1.05846e-12	0.0533991	1.33308	1.24715	2.85653	4.01698	3.58561	1.30783	1.95539e-12	0.14369	0.725069	0.779205	1.10458	1.15872	0.990577
1448	Tardbp	2.2402e-26	0.170039	14.4838	16.8833	20.363	24.8968	23.2114	15.1889	1.27358e-25	0.311366	0.464348	0.256501	0.74201	0.534163	0.580681
1449	Casz1	2.08482e-06	0.00444884	5.17087	4.20564	5.85393	7.6137	6.95954	4.88723	2.90308e-06	0.0290301	0.151458	0.396855	0.481159	0.726557	0.435097
1450	Pex14	9.12167e-06	0.18349	0.35595	0.414504	0.717726	1.14546	0.986459	0.373156	1.23115e-05	0.327006	0.341197	0.280204	0.661983	0.60099	0.532703
1451	Dffa	0.105056	0.514024	17.5043	19.8962	17.9163	19.2401	18.748	18.2072	0.113299	0.656946	0.0317688	-0.143612	0.129357	-0.0460241	0.0400612
1452	Kif1b	4.95369e-12	0.420134	35.179	37.0642	40.8972	44.5488	43.1914	35.7329	8.79121e-12	0.576644	0.211702	0.138419	0.332262	0.258979	0.26669
1453	Ube4b	1.55383e-16	0.0323262	8.04299	8.5652	10.8365	13.8119	12.7059	8.19644	4.72412e-16	0.101579	0.388371	0.307375	0.711889	0.630893	0.575647
1454	Nmnat1	3.22906e-15	0.85286	2.47952	2.65638	0.659533	0.754527	0.719215	2.53149	7.9257e-15	0.905115	-1.06811	-1.13964	-0.987805	-1.05933	-1.03853
1455	Ctnnbip1	0.000962001	0.495593	3.66945	5.10704	4.18327	5.14168	4.78541	4.0919	0.00118488	0.641665	0.150608	-0.236612	0.39538	0.00815922	0.184215
1456	Clstn1	0.0223272	0.019905	2.60728	2.23619	1.43818	2.3638	2.01973	2.49823	0.0253967	0.0738808	-0.565104	-0.40849	-0.100817	0.0557972	-0.212208
1457	Tmem201	2.39263e-07	0.070281	14.6854	15.142	9.18128	12.3812	11.1917	14.8196	3.46238e-07	0.171762	-0.6235	-0.664902	-0.22921	-0.270612	-0.375809
1458	Slc25a33	0.59251	0.390716	2.3318	2.62801	2.79455	2.62363	2.68717	2.41885	0.60083	0.550785	0.187627	0.064749	0.121135	-0.00174272	0.109004
1459	H6pd	9.29921e-31	0.0842555	0.371795	0.590849	2.7325	3.81634	3.41345	0.436166	6.593e-30	0.195116	1.44408	1.23035	1.81187	1.59814	1.61968
1460	Gpr157	0.00686772	0.0262501	6.38995	6.27785	4.35708	6.25088	5.5469	6.35701	0.00805598	0.0883625	-0.464118	-0.442066	-0.0274086	-0.00535567	-0.168307
1461	Eno1	4.14912e-55	0.13418	18.7897	22.9315	58.6336	70.769	66.258	20.0068	1.21508e-53	0.266359	1.59137	1.31721	1.85861	1.58445	1.67885
1462	Rere	3.52088e-16	4.04021e-05	25.8935	23.44	29.5417	38.4634	35.1469	25.1725	1.01027e-15	0.00144061	0.183523	0.321535	0.553257	0.691269	0.465821
1463	Errfi1	0.0159433	0.432633	2.84193	3.40386	2.18553	2.31538	2.26711	3.00706	0.0182989	0.588304	-0.270299	-0.467234	-0.212657	-0.409592	-0.294528
1464	Park7	3.62503e-32	0.491607	73.1509	88.3756	105.8	125.839	118.39	77.6248	2.7957e-31	0.638834	0.526377	0.25696	0.774462	0.505045	0.602625
1465	Camta1	0.0639847	0.779304	34.0527	34.4846	30.9607	31.9832	31.6031	34.1796	0.0702768	0.855167	-0.133229	-0.150895	-0.0877952	-0.105462	-0.109731
1466	Vamp3	1.12406e-05	0.450706	7.65481	8.71002	9.81476	10.1794	10.0439	7.96489	1.51068e-05	0.603633	0.321428	0.155455	0.369272	0.2033	0.300887
1467	Dnajc11	0.301837	0.109681	2.15408	2.02992	1.71713	2.36989	2.12724	2.11759	0.313335	0.23257	-0.215134	-0.157196	0.0954844	0.153422	0.00445863
1468	Thap3	3.56497e-08	0.565225	6.70252	7.20802	8.82835	9.86955	9.48251	6.85106	5.32621e-08	0.699717	0.35162	0.259916	0.49689	0.405186	0.417024
1469	Klhl21	0.000462357	0.00791729	25.1037	25.8596	21.8229	28.8024	26.208	25.3258	0.000577827	0.0415719	-0.193768	-0.234952	0.191177	0.149993	0.0475514
1470	Nol9	0.00150129	0.6925	0.171094	0.210338	0	0	0	0.182626	0.00182719	0.795562	-0.227857	-0.27541	-0.227857	-0.27541	-0.241994
1471	Acot7	0.0100755	0.595567	2.43497	2.97206	2.73796	3.5937	3.2756	2.59279	0.0117029	0.721369	0.121957	-0.0876339	0.419361	0.209771	0.25102
1472	A430005L14Rik	0.364129	0.528757	5.86682	6.09996	6.76717	6.47829	6.58568	5.93533	0.375725	0.669963	0.177747	0.129578	0.123067	0.0748984	0.129313
1473	Lrrc47	0.000681235	0.228966	3.64678	3.79215	4.36404	5.4552	5.04959	3.6895	0.000844926	0.380508	0.207088	0.162647	0.47423	0.429788	0.367402
1474	Tprgl	4.02022e-18	0.60714	17.1546	18.1789	21.9828	23.6569	23.0346	17.4556	1.48635e-17	0.73152	0.340217	0.261028	0.441656	0.362467	0.381051
1475	Prxl2b	0.0703272	0.0534374	9.91636	10.6108	11.8089	10.4836	10.9763	10.1204	0.0769949	0.143748	0.230657	0.141681	0.0730873	-0.0158886	0.106967
1476	Rer1	0.0109094	0.75998	6.59185	6.21712	7.71718	7.56976	7.62456	6.48173	0.0126318	0.843631	0.19941	0.272438	0.174803	0.247831	0.205079
1477	Ski	4.69538e-29	3.60766e-05	9.26734	8.86795	12.8775	17.7863	15.9615	9.14998	3.06418e-28	0.00134388	0.434689	0.49193	0.871615	0.928855	0.740792
1478	Tmem52	0.737943	0.718545	24.6966	24.7149	25.269	26.1446	25.8191	24.702	0.743439	0.814088	0.0317818	0.0307543	0.0790895	0.0780621	0.0613826
1479	Gnb1	2.41438e-56	1.34426e-05	6.84628	7.34508	14.9786	21.9709	19.3717	6.99285	7.67736e-55	0.000658379	1.02607	0.937148	1.54973	1.46081	1.34978
1480	Nadk	0.00124279	0.0159586	1.14674	0.883897	1.1918	1.92685	1.65361	1.0695	0.00151974	0.0640599	0.0299665	0.218393	0.447201	0.635628	0.358673
1481	Cdk11b	0.0276638	0.239971	1.65853	1.83862	1.74141	2.5584	2.25471	1.71145	0.0312999	0.393351	0.0442932	-0.0502703	0.420603	0.32604	0.263463
1482	Mib2	7.51017e-07	0.00226136	1.09632	0.915395	1.19719	2.23328	1.84814	1.04316	1.06634e-06	0.0194625	0.0677961	0.198015	0.62514	0.755358	0.47922
1483	Ssu72	0.00238455	0.897399	6.20051	6.78214	7.1364	7.81336	7.56171	6.37142	0.00287347	0.935147	0.176292	0.0642238	0.291593	0.179525	0.215956
1484	Atad3a	0.0196852	0.00838531	1.27525	0.774327	0.55845	1.0073	0.840451	1.12805	0.0224545	0.043052	-0.545911	-0.187161	-0.180766	0.177985	-0.209471
1485	Vwa1	8.81818e-18	0.274538	1.69009	1.87164	3.7417	4.54805	4.24831	1.74344	3.15485e-17	0.432221	0.817754	0.72353	1.04433	0.950104	0.935867
1486	Mrpl20	0.380387	0.922754	9.22937	9.82091	8.454	8.94917	8.7651	9.4032	0.391788	0.950999	-0.113721	-0.194826	-0.0400692	-0.121175	-0.0913208
1487	Ccnl2	1.46112e-46	0.000131078	6.32238	5.94444	12.8975	17.3761	15.7113	6.21132	2.62081e-45	0.00332455	0.924437	1.00089	1.32745	1.4039	1.21249
1488	Aurkaip1	7.31583e-06	0.229748	21.7273	22.7939	26.6213	25.6822	26.0313	22.0407	9.91184e-06	0.38151	0.281353	0.215185	0.231453	0.165286	0.230444
1489	Dvl1	4.24173e-14	0.038375	2.87222	3.19684	4.17782	5.81086	5.20382	2.96761	8.92266e-14	0.113902	0.419185	0.303042	0.814679	0.698535	0.644886
1490	Ints11	0.00142226	0.373437	0.245692	0.558016	0.585632	0.708962	0.663117	0.337471	0.00173448	0.533876	0.34811	0.0253481	0.456173	0.133411	0.314381
1491	Ube2j2	4.26826e-09	6.72056e-06	15.3091	14.4597	13.939	19.4835	17.4225	15.0595	6.58236e-09	0.000374331	-0.126589	-0.049421	0.328783	0.405951	0.19804
1492	C1qtnf12	2.00177e-14	0.908342	1.43684	2.03729	3.20166	3.86226	3.6167	1.61328	4.38763e-14	0.941715	0.785948	0.468175	0.996618	0.678845	0.820997
1493	Sdf4	1.81122e-57	0.159421	13.4361	14.7327	23.9628	27.1816	25.9851	13.8171	6.14951e-56	0.298132	0.790098	0.666015	0.965073	0.84099	0.864898
1494	Perm1	8.90477e-53	0.86914	10.3685	10.2164	3.14263	3.12881	3.13395	10.3238	2.29264e-51	0.915664	-1.45642	-1.437	-1.46124	-1.44182	-1.45377
1495	1700109H08Rik	1.0291e-60	0.252874	0.30404	0.455968	4.72199	5.46507	5.18885	0.348686	4.32018e-59	0.407834	2.13353	1.97454	2.30968	2.15069	2.19812
1496	Gatad1	7.19179e-08	0.762484	7.72612	8.69332	9.29504	10.5019	10.0533	8.01034	1.06219e-07	0.84454	0.238537	0.0868861	0.398462	0.246812	0.294822
1497	Akap9	1.56875e-11	0.0756713	4.64682	3.8275	6.92405	7.64052	7.37419	4.40605	2.70298e-11	0.18094	0.488801	0.714963	0.613681	0.839844	0.631375
1498	Steap4	7.7553e-10	0.233644	9.57648	10.3067	12.4319	14.7856	13.9107	9.79106	1.23235e-09	0.385875	0.344807	0.248489	0.577749	0.481431	0.466508
1499	Sri	2.26031e-24	0.192777	3.47213	3.92775	7.36876	9.02581	8.40984	3.60602	1.16108e-23	0.33908	0.904051	0.764085	1.16468	1.02472	1.03065
1500	Abcb4	0.0926502	0.935816	7.81534	7.95651	6.83722	6.91244	6.88448	7.85682	0.100428	0.958516	-0.169674	-0.192594	-0.155893	-0.178813	-0.167774
1501	Crot	0.349233	0.658942	1.24971	1.30773	0.84357	1.06756	0.984297	1.26676	0.360966	0.77178	-0.287234	-0.323974	-0.121807	-0.158547	-0.192002
1502	Cacna2d1	3.50425e-40	0.299852	135.175	152.254	217.734	249.24	237.528	140.194	4.47724e-39	0.460422	0.683711	0.513249	0.877849	0.707388	0.756482
1503	Sema3c	2.59881e-29	0.0916847	6.39292	7.14504	12.5743	11.7662	12.0666	6.61394	1.71284e-28	0.206449	0.876656	0.736879	0.788115	0.648338	0.779168
1504	Cd36	1.0187e-12	2.39801e-05	32.1679	23.1248	22.0386	23.358	22.8675	29.5105	1.88521e-12	0.00100669	-0.525736	-0.0664674	-0.445393	0.0138757	-0.354257
1505	Phtf2	1.54857e-29	0.225687	31.1124	33.1189	43.4295	48.552	46.6478	31.702	1.03668e-28	0.376527	0.46839	0.380947	0.625814	0.53837	0.543031
1506	Tmem60	0.0177414	0.0439851	8.96063	10.742	8.89817	8.87015	8.88056	9.48412	0.0203051	0.125997	-0.00907555	-0.246451	-0.0131651	-0.25054	-0.0855401
1507	Rsbn1l	0.077664	0.285414	1.16098	1.43765	0.733496	1.45294	1.18551	1.24229	0.0846251	0.444581	-0.318004	-0.491806	0.182825	0.00902325	-0.0370031
1508	Pmpcb	0.376263	0.967558	14.404	13.3533	14.8877	13.7871	14.1962	14.0952	0.387728	0.979593	0.0446051	0.146527	-0.0589651	0.0429567	0.00961918
1509	Dnajc2	1.61758e-05	0.895058	1.08543	1.46191	1.98149	2.30033	2.18181	1.19606	2.15931e-05	0.933507	0.515689	0.276258	0.662265	0.422835	0.534929
1510	Psmc2	1.45852e-06	0.0407268	55.0618	62.3618	70.6189	67.8659	68.8893	57.2069	2.04601e-06	0.119106	0.353324	0.176729	0.296772	0.120177	0.26388
1511	Orc5	0.00279441	0.749858	3.65627	4.3313	4.71221	5.1608	4.99405	3.85464	0.00335408	0.835769	0.294873	0.0995611	0.403943	0.208631	0.304167
1512	Kmt2e	1.25729e-48	0.000243535	5.84035	4.88907	12.8784	16.4007	15.0913	5.56081	2.539e-47	0.00509928	1.0207	1.23673	1.347	1.56303	1.29434
1513	Srpk2	1.46108e-22	0.0570751	1.67194	1.89769	3.74439	5.0789	4.58283	1.73828	6.95217e-22	0.15082	0.828336	0.71132	1.18592	1.06891	1.02773
1514	Rint1	3.78947e-05	0.787914	0.178531	0.290015	0.618873	0.677226	0.655534	0.211291	4.97364e-05	0.861399	0.458	0.327602	0.509088	0.378689	0.450751
1515	Tomm7	2.42847e-68	7.71358e-07	47.5815	50.9559	91.9131	77.7607	83.0216	48.5731	1.73911e-66	7.2016e-05	0.935475	0.838595	0.697069	0.600189	0.761202
1516	Klhl7	0.00829648	0.626638	1.47999	1.8266	0.809532	0.935036	0.888382	1.58185	0.00967998	0.74684	-0.45472	-0.643452	-0.357976	-0.546709	-0.451253
1517	Slc4a2	3.06638e-10	0.0347727	0.309525	0.453868	0.812996	1.71607	1.38038	0.351941	4.94356e-10	0.106481	0.469333	0.31848	1.05248	0.901627	0.816156
1518	Fastk	1.4927e-06	3.68249e-05	7.28712	6.66566	6.2791	9.26281	8.15368	7.1045	2.09258e-06	0.00134971	-0.187111	-0.0746503	0.308483	0.420944	0.175629
1519	Agap3	0.000346134	0.346278	6.58831	7.86396	8.35055	8.76057	8.60816	6.96317	0.000435323	0.506196	0.301273	0.0771001	0.363187	0.139014	0.270916
1520	Asb10	3.00978e-11	0.156242	6.81806	8.54	4.74301	5.46072	5.19393	7.32407	5.1013e-11	0.294773	-0.445002	-0.732181	-0.275115	-0.562294	-0.426434
1521	Abcf2	0.000149142	0.208728	13.4764	14.4262	16.5388	15.9907	16.1944	13.7555	0.000190896	0.357185	0.276842	0.185163	0.231038	0.139359	0.220684
1522	Smarcd3	0.00243315	0.291828	8.58174	9.79075	6.76365	9.06694	8.21074	8.93702	0.0029312	0.451518	-0.303553	-0.474988	0.0712651	-0.10017	-0.109496
1523	Nub1	1.07477e-09	0.11563	2.39299	2.58332	3.61729	4.8292	4.3787	2.44892	1.69992e-09	0.241342	0.444489	0.365752	0.78074	0.702003	0.641113
1524	Rheb	1.47109e-17	0.355538	25.6177	27.2901	16.3404	15.9163	16.074	26.1092	5.13376e-17	0.516518	-0.618249	-0.706159	-0.65397	-0.741881	-0.666982
1525	Kmt2c	0.186637	0.852701	8.73467	9.76677	8.60904	9.84296	9.38428	9.03796	0.19714	0.905059	-0.0187394	-0.164121	0.155555	0.0101732	0.0489347
1526	Actr3b	4.34298e-10	0.682051	1.70939	1.92508	0.384782	0.430421	0.413455	1.77277	6.96217e-10	0.788286	-0.968309	-1.07882	-0.921528	-1.03204	-0.972102
1527	Nom1	0.541603	0.762021	1.65153	1.77962	1.22174	1.50553	1.40004	1.68917	0.550847	0.844346	-0.255133	-0.3232	-0.0817063	-0.149773	-0.164103
1528	Ube3c	0.0387169	0.429184	5.28692	6.03377	4.56209	5.89622	5.40029	5.50639	0.0432715	0.584827	-0.176725	-0.338669	0.133453	-0.0284908	-0.0237195
1529	Dnajb6	0.0012957	0.0260088	8.55856	8.93964	7.72616	9.87219	9.07445	8.67054	0.00158353	0.0878504	-0.131446	-0.187846	0.185778	0.129378	0.0590329
1530	Hadha	0.00162283	0.0439191	14.1703	11.8213	11.5683	11.8109	11.7207	13.48	0.00197173	0.125935	-0.271464	-0.0287526	-0.243877	-0.00116512	-0.186883
1531	Hadhb	2.45368e-06	0.144041	27.9339	22.6988	27.417	24.5154	25.594	26.3956	3.40558e-06	0.280192	-0.0260075	0.26194	-0.181393	0.106554	-0.0428392
1532	Mapre3	1.08181e-06	0.6649	42.2797	50.3569	43.463	53.1273	49.5348	44.6532	1.52661e-06	0.776025	0.038916	-0.207953	0.322667	0.0757982	0.14656
1533	Ost4	7.97745e-18	0.0412821	39.304	44.8438	57.2303	55.5929	56.2016	40.932	2.86127e-17	0.120317	0.530846	0.345044	0.489697	0.303895	0.448005
1534	Atraid	9.93469e-08	0.473974	3.11439	3.37064	5.08625	4.89373	4.9653	3.18969	1.45896e-07	0.624201	0.564875	0.47771	0.518503	0.431339	0.50975
1535	Trim54	2.11096e-20	0.673775	38.4892	39.8599	20.1893	23.0415	21.9813	38.892	9.08107e-20	0.782176	-0.89812	-0.947349	-0.715932	-0.76516	-0.795641
1536	Gtf3c2	1.04751e-19	0.00126421	3.95881	3.38629	6.20008	8.42497	7.59792	3.79057	4.34397e-19	0.0145589	0.538018	0.715012	0.926493	1.10349	0.84379
1537	Eif2b4	0.132395	0.531158	31.103	33.5285	28.451	32.7413	31.1465	31.8157	0.141565	0.671392	-0.124392	-0.22947	0.0718086	-0.0332696	-0.029727
1538	Snx17	1.76709e-06	0.388848	1.33916	1.53064	2.17596	2.77571	2.55276	1.39543	2.4683e-06	0.54909	0.4412	0.327687	0.690755	0.577242	0.568656
1539	Ppm1g	0.0166404	0.0611541	3.06734	3.06287	2.86048	4.18727	3.69407	3.06603	0.0190707	0.157878	-0.0753058	-0.0737181	0.350888	0.352476	0.207217
1540	Nrbp1	3.19502e-09	0.903287	17.4902	20.2531	22.6676	25.695	24.5696	18.3021	4.95504e-09	0.938535	0.356151	0.155239	0.529806	0.328895	0.405671
1541	Mrpl33	2.24954e-51	0.00547557	20.3192	24.6012	44.8561	41.9392	43.0235	21.5775	5.31041e-50	0.0331884	1.10496	0.840901	1.01014	0.746081	0.963385
1542	Babam2	4.60473e-05	0.631249	3.77403	4.46003	5.13785	5.50863	5.3708	3.97562	6.02141e-05	0.750392	0.362525	0.168825	0.447145	0.253445	0.356598
1543	Ppp1cb	0.0766792	0.749567	19.271	21.2782	19.7118	21.2361	20.6694	19.8608	0.0835948	0.835554	0.0310351	-0.105181	0.133487	-0.00272848	0.0548675
1544	Pisd	2.91362e-54	0.691593	0.291645	0.486316	4.36632	4.378	4.37366	0.348851	8.16771e-53	0.795052	2.05472	1.85219	2.05786	1.85533	1.99417
1545	Ywhah	5.86596e-06	0.0487164	2.43526	2.46199	3.04917	4.50865	3.96612	2.44312	7.98813e-06	0.1344	0.237205	0.226021	0.68128	0.670097	0.528404
1546	Ctbp1	3.84696e-23	8.83299e-05	26.5481	24.7889	32.2601	39.5247	36.8242	26.0311	1.87873e-22	0.00249393	0.27184	0.367041	0.55685	0.65205	0.484689
1547	Maea	7.16768e-12	0.0304731	12.1035	12.3216	14.3377	17.2106	16.1427	12.1676	1.25711e-11	0.097923	0.227127	0.203316	0.474826	0.451015	0.3806
1548	Fam53a	0.0501715	0.794476	0.913105	1.25775	0.487754	0.920661	0.759738	1.01438	0.0556141	0.865685	-0.362779	-0.60175	0.0056873	-0.233283	-0.194977
1549	Letm1	0.0062979	0.499836	2.3901	3.07824	1.73808	2.09437	1.96193	2.59231	0.00741001	0.644995	-0.308162	-0.574785	-0.131679	-0.398302	-0.278378
1550	Mxd4	9.33926e-23	0.0155681	2.54345	2.08129	4.88399	5.94692	5.5518	2.40764	4.48643e-22	0.0631769	0.731638	0.933261	0.971217	1.17284	0.943117
1551	Rnf4	7.56283e-16	0.698701	0.405766	0.592753	1.73779	2.06289	1.94204	0.460714	2.04735e-15	0.799991	0.961656	0.78149	1.12353	0.943369	1.01014
1552	Fam193a	4.65694e-19	0.0148698	4.64673	4.71855	6.92992	9.00132	8.23132	4.66783	1.85885e-18	0.0613065	0.489891	0.471655	0.824704	0.806468	0.70374
1553	Add1	1.4783e-09	0.0074803	11.9819	11.056	13.7137	15.9385	15.1115	11.7098	2.32609e-09	0.0400673	0.18066	0.287417	0.383799	0.490556	0.342145
1554	Nop14	0.00411364	0.228343	7.70029	9.48005	9.59731	9.96447	9.82799	8.22329	0.00489205	0.379622	0.284563	0.0160531	0.333701	0.065191	0.231412
1555	Htra3	1.24987e-40	0.0015122	4.7621	4.55274	9.72534	12.6535	11.565	4.70058	1.63616e-39	0.015894	0.896356	0.949753	1.2446	1.298	1.14023
1556	Ablim2	9.8413e-60	0.000884802	6.77968	6.48841	14.6621	18.0999	16.822	6.69409	3.90081e-58	0.0117633	1.0095	1.06455	1.29579	1.35084	1.21184
1557	Afap1	1.93396e-12	0.0602644	7.24975	6.38462	10.1945	11.4158	10.9618	6.99552	3.51712e-12	0.156386	0.440367	0.600193	0.589751	0.749577	0.581168
1558	Grpel1	1.96183e-07	0.00421742	18.386	19.3994	25.3285	21.27	22.7786	18.6838	2.85011e-07	0.0280568	0.441611	0.368103	0.200083	0.126575	0.272658
1559	D5Ertd579e	1.11424e-11	0.00393659	48.5247	43.664	58.8852	71.8063	67.0032	47.0964	1.93196e-11	0.0268166	0.274051	0.423087	0.555913	0.704949	0.499674
1560	Mrfap1	4.14478e-40	0.866614	37.9925	42.2838	50.9006	54.8498	53.3818	39.2535	5.26405e-39	0.914587	0.412554	0.261925	0.518355	0.367725	0.434007
1561	Wfs1	4.31658e-10	0.00429026	9.04453	7.46706	10.6578	11.7058	11.3162	8.58098	6.92115e-10	0.0283385	0.214881	0.461359	0.339081	0.585558	0.362317
1562	Evc	2.40386e-06	0.00203049	6.52835	5.15244	7.13017	8.49122	7.98528	6.12403	3.3397e-06	0.0183944	0.11095	0.402127	0.334259	0.625436	0.33487
1563	Wdr1	2.21749e-42	0.0297558	5.1134	5.49198	13.2204	16.6414	15.3697	5.22465	3.19214e-41	0.0963812	1.21791	1.13123	1.52892	1.44223	1.39496
1564	Rab28	0.133308	0.640294	3.015	2.81366	2.72764	2.26934	2.4397	2.95584	0.142505	0.757438	-0.107138	-0.0329153	-0.296401	-0.222179	-0.201699
1565	Tapt1	0.000517769	0.81533	4.28259	5.53307	5.46633	6.50313	6.11772	4.65006	0.000645375	0.880527	0.291703	-0.0148132	0.506246	0.199731	0.33315
1566	Qdpr	0.00121907	0.683497	4.74642	5.93942	4.57176	6.05063	5.5009	5.09699	0.00149202	0.789462	-0.0445281	-0.316682	0.29509	0.0229367	0.0925408
1567	Lap3	0.552497	0.895658	4.26204	4.72122	4.28016	4.65933	4.51838	4.39698	0.561524	0.933904	0.0049594	-0.115741	0.10501	-0.0156907	0.032095
1568	Med28	3.81458e-06	0.13657	6.73375	5.77316	8.22956	8.479	8.38628	6.45147	5.24997e-06	0.269721	0.255094	0.446433	0.293567	0.484906	0.333028
1569	Adgra3	0.0918586	0.182394	6.57345	6.29116	6.78345	7.64014	7.32169	6.4905	0.0995827	0.326246	0.0394596	0.0942617	0.190104	0.244906	0.151815
1570	Ppargc1a	7.56798e-11	0.531148	10.1472	11.118	5.31612	5.34738	5.33576	10.4324	1.25794e-10	0.671392	-0.819565	-0.940037	-0.812442	-0.932915	-0.851544
1571	Dhx15	0.00362429	0.917418	6.13977	7.03407	6.87617	7.85381	7.4904	6.40257	0.00432277	0.94755	0.141616	-0.0286378	0.310421	0.140167	0.197805
1572	Sod3	1.16239e-69	6.89325e-05	0.470291	0.380586	6.20134	9.15506	8.05708	0.44393	9.3452e-68	0.002054	2.29216	2.38299	2.78803	2.87885	2.64905
1573	Anapc4	0.35858	0.76338	7.0389	7.33128	7.80624	7.83859	7.82657	7.12482	0.370178	0.845334	0.131527	0.0799871	0.136818	0.0852781	0.119516
1574	Sel1l3	1.34357e-34	0.225475	8.65636	10.2225	13.798	16.6181	15.5698	9.11659	1.19644e-33	0.376299	0.615847	0.399004	0.867507	0.650664	0.711831
1575	Smim20	9.31163e-19	0.219919	3.9902	3.9798	6.86334	7.78508	7.44244	3.98714	3.65013e-18	0.370313	0.656044	0.659055	0.815957	0.818969	0.759447
1576	Rbpj	3.62073e-44	0.141544	19.1104	20.9145	31.1849	35.8484	34.1148	19.6405	5.83286e-43	0.276344	0.678442	0.5545	0.87366	0.749717	0.7666
1577	Tbc1d19	9.06609e-12	0.424149	2.43668	2.44019	4.70248	4.25784	4.42313	2.43772	1.58095e-11	0.579913	0.730572	0.7291	0.613454	0.611982	0.657675
1578	Stim2	1.44554e-14	0.0123263	2.36483	2.61558	3.33576	4.96256	4.35783	2.43851	3.22147e-14	0.0546824	0.365753	0.262058	0.825399	0.721704	0.639864
1579	0610040J01Rik	2.96919e-08	0.200548	0.361403	0.550288	0	0	0	0.416909	4.44935e-08	0.348008	-0.445094	-0.632536	-0.445094	-0.632536	-0.502747
1580	Tbc1d1	1.88689e-35	0.207769	5.37832	6.43595	1.02454	1.21193	1.14227	5.68911	1.79065e-34	0.356372	-1.65558	-1.87693	-1.52787	-1.74921	-1.64267
1581	Rfc1	8.69814e-05	0.58517	1.14655	1.48191	1.71126	2.27731	2.06689	1.24509	0.000112448	0.714342	0.336947	0.127516	0.610495	0.401064	0.450002
1582	Lias	0.152645	0.285341	7.71743	8.13373	7.27251	8.73492	8.1913	7.83976	0.16226	0.444548	-0.0755784	-0.142879	0.159265	0.0919648	0.0562608
1583	Smim14	2.67807e-16	0.582869	6.18932	6.59316	9.97229	9.90907	9.93257	6.30799	7.81861e-16	0.713118	0.609937	0.531092	0.601601	0.522755	0.581085
1584	Ube2k	0.371805	0.849888	12.9741	12.7947	14.082	13.6853	13.8328	12.9214	0.383413	0.902411	0.11007	0.128712	0.0716175	0.0902596	0.0914844
1585	Pds5a	0.192669	0.0737095	1.2996	1.16612	0.790897	1.347	1.14028	1.26038	0.203284	0.177961	-0.360704	-0.274434	0.0294297	0.1157	-0.0787667
1586	Apbb2	3.93964e-08	0.812719	8.01524	8.58137	10.8038	11.6292	11.3224	8.1816	5.87774e-08	0.878598	0.388817	0.300951	0.486327	0.39846	0.424464
1587	Uchl1	0.00519245	0.801632	0.402436	0.49109	0.988301	0.992819	0.99114	0.428488	0.00613987	0.869924	0.503601	0.415169	0.506876	0.418443	0.479106
1588	Limch1	6.72408e-22	0.626778	6.99836	8.80213	12.4626	13.6975	13.2384	7.52841	3.11427e-21	0.74684	0.751179	0.457787	0.877794	0.584403	0.739442
1589	Tmem33	3.40684e-07	0.370363	3.42948	3.41129	1.80027	2.23294	2.0721	3.42414	4.89102e-07	0.530906	-0.661571	-0.655635	-0.454292	-0.448357	-0.526169
1590	Slc30a9	0.00312487	0.776966	2.55413	2.76611	3.63689	3.67888	3.66327	2.61642	0.00374334	0.853811	0.383662	0.300085	0.396666	0.313089	0.36678
1591	Atp8a1	0.000410471	0.736521	5.95976	7.35738	6.42915	7.58664	7.15637	6.37047	0.000514493	0.826883	0.0941598	-0.169854	0.303055	0.0390416	0.146171
1592	Yipf7	0.00105586	0.17788	16.9466	17.4113	20.3312	18.9735	19.4782	17.0832	0.00129711	0.320961	0.249253	0.212372	0.154377	0.117496	0.179442
1593	Guf1	0.00541567	0.77169	0.346279	0.470614	0.638579	0.833179	0.760841	0.382816	0.00639407	0.850626	0.283468	0.156026	0.44537	0.317929	0.348655
1594	Commd8	5.91028e-05	0.819882	0.371659	0.476922	0.881571	1.04752	0.985831	0.402591	7.68733e-05	0.88354	0.456016	0.349344	0.577955	0.471283	0.501648
1595	Slain2	0.0202796	0.0235189	19.1976	18.9427	16.5974	19.4213	18.3716	19.1227	0.023117	0.0822099	-0.198823	-0.180496	0.0158871	0.034214	-0.0548839
1596	Ociad1	1.60889e-16	0.0752483	7.48248	7.71701	10.2905	12.2545	11.5244	7.5514	4.88282e-16	0.180131	0.412551	0.373204	0.643925	0.604579	0.550513
1597	Ociad2	2.91781e-05	6.07243e-06	8.44933	11.2364	10.7124	9.17995	9.74962	9.26834	3.85214e-05	0.00034731	0.309759	-0.0631393	0.107447	-0.265451	0.0660829
1598	Sgcb	1.62762e-16	0.944537	7.51855	8.25871	11.4701	12.1423	11.8924	7.73605	4.93264e-16	0.963647	0.549794	0.429591	0.625533	0.505331	0.561468
1599	Usp46	0.002438	0.948262	0.317692	0.442407	0.705354	0.81439	0.773858	0.35434	0.00293663	0.966116	0.372058	0.241593	0.461472	0.331006	0.3893
1600	Chic2	1.58486e-17	0.975028	11.7368	12.2523	18.3124	18.7805	18.6065	11.8883	5.49479e-17	0.98436	0.600524	0.543282	0.63508	0.577837	0.605273
1601	Kdr	0.0781313	0.0169786	74.3493	65.4973	70.6542	76.4987	74.3261	71.748	0.0851125	0.0668941	-0.0725431	0.107755	0.0405778	0.220876	0.0502416
1602	Clock	0.000744195	0.953038	0.239393	0.531298	0.457953	0.737494	0.633581	0.325172	0.000921539	0.969869	0.234311	-0.0708101	0.487374	0.182253	0.301858
1603	Ppat	0.00115629	0.365525	0.357553	0.555034	0.510092	0.934695	0.776858	0.415585	0.0014168	0.525745	0.153628	-0.0423097	0.511098	0.31516	0.327931
1604	Paics	2.29288e-14	0.0166359	59.9708	64.8257	77.1827	73.5475	74.8988	61.3974	4.99104e-14	0.0659401	0.358732	0.248199	0.290043	0.17951	0.282591
1605	Srp72	4.65443e-11	0.55325	2.94357	3.09882	4.92456	5.47598	5.271	2.98919	7.80193e-11	0.690046	0.587206	0.531499	0.715596	0.659889	0.652599
1606	Polr2b	2.81188e-05	0.760287	3.37403	3.27315	2.39447	2.1464	2.23862	3.34439	3.71517e-05	0.843664	-0.365775	-0.332112	-0.475261	-0.441598	-0.423775
1607	Igfbp7	2.08828e-38	0.487351	16.5144	20.0774	29.9373	32.1095	31.302	17.5614	2.36339e-37	0.635241	0.820804	0.553649	0.918706	0.65155	0.799318
1608	Utp3	3.64721e-11	0.492972	4.82505	4.81559	7.83773	8.51159	8.2611	4.82227	6.15232e-11	0.640097	0.601407	0.603751	0.707417	0.709761	0.669602
1609	Grsf1	0.479237	0.521113	6.86663	7.10443	6.74251	7.47905	7.20526	6.93651	0.489872	0.66322	-0.0229451	-0.0659109	0.108157	0.0651913	0.0480435
1610	Mob1b	3.49053e-13	0.89222	0.417593	0.722047	1.59078	1.84987	1.75356	0.50706	6.69962e-13	0.930936	0.869945	0.589264	1.00745	0.726773	0.869562
1611	Cox18	0.0341355	0.57993	1.11127	1.35244	1.2918	1.73766	1.57192	1.18214	0.0383221	0.711513	0.118372	-0.0376743	0.374835	0.218788	0.237105
1612	Ankrd17	4.26536e-07	0.0144998	7.45206	7.79714	7.73573	10.3122	9.35448	7.55346	6.10503e-07	0.0603061	0.0476246	-0.0101066	0.42051	0.362779	0.275675
1613	Pf4	5.77119e-38	0.372912	2.9182	2.83498	20.9469	23.382	22.4768	2.89374	6.38729e-37	0.533644	2.48575	2.51672	2.63756	2.66853	2.59201
1614	Parm1	7.34201e-08	0.880795	3.69402	3.88751	2.12593	2.23811	2.19641	3.75088	1.08419e-07	0.92281	-0.586539	-0.644814	-0.535672	-0.593946	-0.571742
1615	Rchy1	1.07864e-05	0.1539	6.96991	7.92828	9.30048	9.06913	9.15513	7.25154	1.45079e-05	0.291806	0.370076	0.206257	0.337304	0.173485	0.299474
1616	G3bp2	4.54867e-06	0.437367	8.63512	9.3508	9.97992	11.4045	10.8749	8.84543	6.22911e-06	0.593148	0.188492	0.0851253	0.364488	0.261121	0.270394
1617	Uso1	0.240724	0.860536	4.32476	5.13745	4.32378	5.00335	4.75073	4.56358	0.251911	0.911209	-0.000267192	-0.205188	0.17305	-0.0318705	0.0477332
1618	Sdad1	0.0133883	0.137712	8.4451	9.21839	6.16238	8.87787	7.86845	8.67234	0.0154203	0.271285	-0.399127	-0.512658	0.0646345	-0.0488963	-0.125183
1619	Art3	3.42114e-12	2.70432e-08	42.5105	54.1118	59.9154	51.4396	54.5903	45.9197	6.13143e-12	5.76155e-06	0.485442	0.144445	0.269291	-0.0717068	0.244639
1620	Scarb2	4.50618e-17	0.487263	9.80708	10.9185	13.9875	15.9371	15.2124	10.1337	1.48498e-16	0.635224	0.471783	0.330552	0.648214	0.506983	0.542166
1621	Stbd1	4.15379e-19	0.0120161	4.8572	7.54817	8.07674	8.88222	8.5828	5.64797	1.66347e-18	0.0537823	0.631964	0.0865598	0.754624	0.20922	0.527534
1622	Septin11	6.37015e-34	0.0651988	8.15512	7.68376	14.0882	15.6447	15.0661	8.0166	5.45592e-33	0.164095	0.720773	0.797032	0.862415	0.938674	0.833367
1623	Ccni	1.31238e-25	0.00594131	6.11264	6.58166	9.09823	12.1749	11.0312	6.25047	7.20163e-25	0.0345846	0.505646	0.413516	0.889339	0.79721	0.73064
1624	Anxa3	0.0053461	0.863736	1.18101	1.68853	1.47174	2.05259	1.83667	1.33015	0.00631455	0.912509	0.18053	-0.12129	0.485036	0.183216	0.283776
1625	Hnrnpd	1.14317e-20	7.32996e-06	4.6085	4.08983	5.93636	9.59187	8.23302	4.45608	4.98571e-20	0.000397872	0.306565	0.446562	0.917271	1.05727	0.758937
1626	Hnrnpdl	0.00469809	0.156874	27.9486	28.1269	28.999	32.3141	31.0818	28.001	0.00556845	0.295704	0.0514179	0.042559	0.202635	0.193777	0.145648
1627	Sec31a	1.91715e-27	0.0126554	18.3498	18.6723	26.2596	31.7417	29.7038	18.4446	1.14172e-26	0.0553925	0.494441	0.470594	0.758807	0.73496	0.659048
1628	Cops4	4.96215e-11	0.000333694	13.0097	14.9681	18.9013	16.3747	17.3139	13.5852	8.30631e-11	0.00623627	0.506438	0.317674	0.310561	0.121796	0.328436
1629	Coq2	0.539664	0.660198	3.1701	3.0201	2.71984	2.80575	2.77381	3.12602	0.549267	0.772513	-0.164842	-0.111991	-0.131901	-0.0790498	-0.128727
1630	Mrps18c	1.58391e-17	0.0864441	2.82964	3.45375	5.95551	5.52906	5.68758	3.01304	5.49371e-17	0.198726	0.860949	0.643137	0.769666	0.551854	0.736789
1631	Wdfy3	0.18386	0.188182	3.6054	3.75907	3.10096	4.14139	3.75464	3.65056	0.194303	0.332992	-0.167364	-0.214717	0.158832	0.111479	0.0319304
1632	Klhl8	3.93503e-62	0.020924	0.579403	1.08876	5.09784	6.98789	6.2853	0.729083	1.80292e-60	0.0764049	1.94892	1.54565	2.33843	1.93517	2.07498
1633	Nudt9	0.000265685	0.0887432	7.4461	9.68393	8.18165	9.0109	8.70264	8.10371	0.000336329	0.201973	0.120467	-0.218617	0.245214	-0.0938705	0.0919234
1634	Sparcl1	1.07063e-22	0.41738	11.8725	11.8654	18.1317	19.2268	18.8198	11.8704	5.12581e-22	0.57453	0.571674	0.572475	0.651979	0.65278	0.622882
1635	Lrrc8c	0.255392	0.866976	1.25853	1.30134	0.860135	0.965302	0.926208	1.27111	0.266569	0.914649	-0.27998	-0.307065	-0.200636	-0.227721	-0.237636
1636	Tgfbr3	2.23942e-24	0.830138	1.82543	2.47936	5.33192	6.14147	5.84054	2.01759	1.15244e-23	0.890254	1.16417	0.863821	1.33775	1.0374	1.18071
1637	Dipk1a	4.41071e-14	0.406499	0.640996	1.20736	2.32195	2.53152	2.45362	0.807427	9.26043e-14	0.564475	1.01746	0.58971	1.10572	0.67797	0.934171
1638	Atp5k	1.02296e-07	0.934893	98.2588	84.1867	119.33	104.659	110.113	94.1236	1.50149e-07	0.958167	0.277735	0.498303	0.0901454	0.310713	0.224148
1639	Pcgf3	6.31387e-19	0.0561395	4.19989	4.83615	5.95076	7.84458	7.1406	4.38686	2.49452e-18	0.149325	0.418689	0.252153	0.766312	0.599777	0.595689
1640	Golga3	3.48321e-12	0.140205	4.36908	4.78501	5.85548	7.2613	6.73872	4.49131	6.24137e-12	0.274799	0.352581	0.244937	0.621693	0.514048	0.494944
1641	Ankle2	0.00750646	0.446836	2.17853	2.73422	2.25434	3.23438	2.87007	2.34183	0.00877986	0.601078	0.0340034	-0.198443	0.413788	0.181341	0.211721
1642	Pgam5	0.0075432	0.941984	3.79056	3.67691	5.01298	4.8477	4.90914	3.75717	0.00882041	0.962467	0.327885	0.362526	0.287674	0.322315	0.312847
1643	Pxmp2	0.00812705	0.869669	10.0009	9.59088	11.7737	11.2016	11.4143	9.88043	0.00948749	0.91577	0.215546	0.270348	0.149447	0.204249	0.190262
1644	Fbrsl1	0.00363971	0.023949	3.38829	3.04934	3.43467	4.33483	4.00022	3.28868	0.00433995	0.083066	0.0151704	0.131142	0.281785	0.397756	0.221456
1645	Ulk1	0.00170155	0.31831	17.1228	18.9472	12.8691	16.6829	15.2652	17.6589	0.00206591	0.479237	-0.385934	-0.524311	-0.0354545	-0.173831	-0.198078
1646	Ttc28	0.00741185	0.50308	1.90134	2.03703	1.05906	1.47467	1.32018	1.94121	0.00867396	0.647522	-0.494731	-0.560677	-0.229481	-0.295427	-0.342176
1647	Pitpnb	1.70601e-06	0.320368	0.290787	0.512375	0.721649	1.24513	1.05054	0.355903	2.38416e-06	0.481229	0.415541	0.186975	0.798549	0.569984	0.59675
1648	Mn1	1.49482e-06	0.357162	1.32125	1.37421	2.21936	2.70686	2.52564	1.33681	2.09521e-06	0.517994	0.471875	0.439331	0.675296	0.642752	0.593346
1649	Tfip11	1.15706e-07	0.227413	0.214754	0.47104	0.470109	0.999729	0.802855	0.290066	1.69394e-07	0.378297	0.275259	-0.000913881	0.719141	0.442968	0.482838
1650	Myo18b	0.00595733	0.171588	12.3399	13.4254	11.2294	13.8613	12.8829	12.6589	0.00701705	0.312986	-0.125405	-0.238262	0.155808	0.0429508	0.0234696
1651	Iscu	1.11942e-05	0.42013	8.47309	8.57458	10.7444	10.2002	10.4025	8.50291	1.50469e-05	0.576644	0.31007	0.294695	0.241618	0.226244	0.262909
1652	Coro1c	4.37947e-36	0.00586231	0.297237	0.458288	5.0446	8.01844	6.91298	0.344563	4.31467e-35	0.0343122	2.2202	2.05137	2.79744	2.6286	2.55708
1653	Ssh1	1.20429e-52	9.55926e-05	0.408613	0.528392	3.20304	5.3042	4.52314	0.443811	3.06356e-51	0.00267095	1.57716	1.45942	2.16204	2.0443	1.93561
1654	Ung	4.88868e-17	0.065574	4.67254	3.20774	0.351017	0.5316	0.464472	4.2421	1.60236e-16	0.164698	-2.06995	-1.639	-1.88896	-1.45801	-1.83976
1655	Acacb	1.03348e-23	0.00858422	8.73654	7.59549	2.53901	3.95868	3.43095	8.40123	5.15652e-23	0.0435599	-1.46006	-1.28024	-0.973454	-0.793625	-1.08523
1656	Kctd10	0.000755525	0.171568	0.817176	1.16242	0.85841	1.79714	1.44819	0.918629	0.000935025	0.312986	0.032371	-0.218579	0.622255	0.371305	0.351639
1657	Ube3b	3.18937e-13	1.31243e-05	7.79151	7.96736	7.33831	11.4571	9.92605	7.84319	6.14234e-13	0.000650261	-0.0763559	-0.104929	0.502789	0.474216	0.305134
1658	Mmab	1.11367e-14	0.0326675	13.1417	13.7432	16.09	19.6154	18.3049	13.3184	2.52411e-14	0.102162	0.273199	0.2131	0.543773	0.483675	0.431096
1659	Gltp	1.24073e-43	0.109372	0.389064	0.52981	6.69227	8.40258	7.76681	0.430423	1.95083e-42	0.232149	2.4693	2.33006	2.75894	2.6197	2.61561
1660	Git2	4.70943e-27	0.028825	3.62049	3.46306	6.7837	8.26673	7.71545	3.57423	2.76213e-26	0.0940093	0.752409	0.802422	1.00401	1.05403	0.930046
1661	Ankrd13a	7.17896e-41	0.00119912	2.8304	2.29686	6.76261	8.66631	7.95865	2.67361	9.49986e-40	0.0142578	1.01905	1.23545	1.33547	1.55187	1.28608
1662	2210016L21Rik	3.05831e-10	0.631835	0.897258	1.27354	1.96115	2.53835	2.32379	1.00783	4.93148e-10	0.750662	0.642241	0.381218	0.899162	0.638139	0.727191
1663	Sppl3	2.57485e-08	0.208197	1.30982	1.4157	2.28916	3.0299	2.75455	1.34093	3.86658e-08	0.356804	0.50994	0.445277	0.802964	0.738301	0.681554
1664	Acads	4.06494e-06	0.00241252	3.07493	2.14933	1.26338	1.96782	1.70596	2.80293	5.58463e-06	0.0201367	-0.848297	-0.476567	-0.457373	-0.0856424	-0.490973
1665	Mlec	4.54808e-35	0.237255	7.97564	11.1896	12.7759	17.3622	15.6573	8.9201	4.17209e-34	0.390476	0.618062	0.176496	1.03265	0.591086	0.747732
1666	Pop5	0.188085	0.812071	1.10198	1.18827	0.764663	0.766418	0.765765	1.12734	0.198619	0.878132	-0.252356	-0.310397	-0.250922	-0.308964	-0.268755
1667	Rnf10	0.000920615	0.00157417	24.6244	23.6726	22.8904	27.3111	25.6678	24.3447	0.00113538	0.0162868	-0.101087	-0.0464813	0.143853	0.198458	0.0734159
1668	Coq5	1.49001e-10	0.345788	5.54952	5.30209	3.08732	3.44948	3.31485	5.47681	2.44236e-10	0.505889	-0.680232	-0.624673	-0.557753	-0.502194	-0.585971
1669	Dynll1	1.63232e-34	0.365289	27.7156	25.4447	57.6833	59.8357	59.0356	27.0483	1.44601e-33	0.525578	1.03112	1.14997	1.08308	1.20194	1.09791
1670	Gatc	8.08624e-23	0.196695	9.07645	9.6806	13.2098	15.1537	14.4311	9.25398	3.90209e-22	0.343915	0.4959	0.411894	0.680879	0.596873	0.589658
1671	Cox6a1	9.46039e-30	0.137651	8.39746	7.42191	16.1043	17.3078	16.8604	8.11079	6.4087e-29	0.271259	0.864013	1.02214	0.962116	1.12024	0.971118
1672	Pxn	1.42985e-23	5.27847e-05	16.6237	17.8128	19.5188	28.7243	25.3024	16.9732	7.09265e-23	0.00169776	0.219427	0.125231	0.754123	0.659927	0.549349
1673	Rab35	0.000125296	0.000491586	5.06772	3.78934	4.97107	5.80888	5.49744	4.69205	0.000161027	0.00799484	-0.023165	0.318163	0.166263	0.507591	0.190922
1674	Tmem233	7.50808e-09	0.284599	8.11941	10.3467	12.535	13.2051	12.956	8.77393	1.14955e-08	0.443636	0.569686	0.254422	0.639393	0.324129	0.513874
1675	Hspb8	9.01041e-49	0.253558	23.3977	33.2103	35.5139	43.0491	40.2481	26.2812	1.83262e-47	0.408562	0.581702	0.0940137	0.85237	0.364682	0.596419
1676	Suds3	1.21688e-13	0.190745	7.53944	6.70864	4.08624	4.30993	4.22678	7.2953	2.43867e-13	0.3362	-0.747543	-0.599877	-0.685448	-0.537782	-0.666372
1677	Taok3	1.88509e-26	0.00015839	1.3722	1.12733	3.91712	7.13065	5.93609	1.30024	1.07528e-25	0.00384028	1.05159	1.20877	1.77715	1.93433	1.59234
1678	Pebp1	2.42243e-31	0.116456	36.4038	41.6543	47.995	50.189	49.3734	37.9467	1.77965e-30	0.242828	0.389452	0.199944	0.452649	0.26314	0.371162
1679	Wsb2	1.57649e-19	0.811274	3.11163	4.70935	5.82922	7.25258	6.72348	3.58113	6.47149e-19	0.877482	0.732012	0.258394	1.00514	0.531518	0.753546
1680	Nos1	8.76341e-28	0.233788	32.5227	32.9717	10.7478	15.1878	13.5373	32.6547	5.3268e-27	0.385964	-1.51275	-1.53195	-1.05023	-1.06942	-1.21104
1681	Fbxo21	1.08124e-08	0.0675098	0.227957	0.184109	0.609397	0.962443	0.831206	0.215072	1.64571e-08	0.168052	0.39026	0.442718	0.676391	0.728849	0.591752
1682	Fbxw8	2.232e-23	0.347172	0.285051	0.475112	1.83821	2.36354	2.16826	0.340902	1.09885e-22	0.507218	1.14315	0.944155	1.38815	1.18916	1.24049
1683	Plbd2	2.96588e-16	1.42385e-05	7.21627	6.30744	8.37882	12.3834	10.8948	6.9492	8.61165e-16	0.000693377	0.190922	0.36004	0.703887	0.873004	0.581446
1684	Tpcn1	0.000135785	0.132719	1.6696	1.7194	2.17867	3.07691	2.74301	1.68423	0.000174193	0.264261	0.251799	0.225134	0.610854	0.584188	0.479688
1685	Ptpn11	1.09808e-06	0.126956	7.89223	7.97808	4.8864	6.3206	5.78747	7.91746	1.54906e-06	0.256901	-0.595159	-0.609022	-0.280582	-0.294445	-0.393758
1686	Trafd1	5.93299e-21	0.000258735	2.82284	2.95085	4.15982	6.96309	5.92104	2.86046	2.63338e-20	0.00533883	0.432675	0.385156	1.05868	1.01116	0.842216
1687	Naa25	0.478633	0.539166	2.40986	2.98621	2.18891	2.3549	2.2932	2.57922	0.489313	0.678495	-0.0966462	-0.321951	-0.0234431	-0.248748	-0.120158
1688	Erp29	3.10306e-22	0.0810574	2.67044	3.31303	5.23609	7.2072	6.47448	2.85927	1.4594e-21	0.190049	0.764689	0.531942	1.16094	0.928189	0.953645
1689	Adam1a	0.0768782	0.720209	5.04745	5.56235	4.63252	4.99046	4.8574	5.19876	0.083801	0.814964	-0.102546	-0.220431	-0.0136602	-0.131545	-0.0817176
1690	Mapkapk5	0.026071	0.665152	4.96816	5.45573	4.44257	4.74516	4.63268	5.11144	0.0295602	0.776025	-0.132997	-0.246293	-0.0549378	-0.168233	-0.11769
1691	Aldh2	9.44552e-39	8.8379e-05	9.56598	8.17001	15.4226	19.0293	17.6886	9.15576	1.09965e-37	0.00249393	0.636259	0.840689	0.922683	1.12711	0.879858
1692	Acad12	0.000151427	0.000476257	5.79666	5.26736	5.04265	7.15657	6.37077	5.64112	0.000193705	0.00780512	-0.169644	-0.0526757	0.263136	0.380105	0.150388
1693	Brap	0.352532	0.482612	1.07137	1.13189	0.692023	0.991789	0.880358	1.08915	0.364155	0.630897	-0.291835	-0.333382	-0.0565192	-0.0980664	-0.151911
1694	Ppp1cc	8.3211e-08	0.00364898	14.1302	14.1395	14.4682	17.8278	16.5789	14.1329	1.22495e-07	0.0255099	0.0318759	0.0309862	0.315437	0.314547	0.216159
1695	Pptc7	1.09802e-06	1.51534e-05	15.0674	12.3872	9.97216	13.2542	12.0342	14.2798	1.54906e-06	0.000729589	-0.550293	-0.287012	-0.172755	0.090526	-0.229331
1696	Vps29	8.16188e-06	0.970486	0.338748	0.630295	0.861809	1.16373	1.0515	0.424422	1.10318e-05	0.98201	0.475821	0.191573	0.692637	0.408389	0.526302
1697	Arpc3	3.0817e-06	0.48463	4.41199	5.02854	5.66279	6.82983	6.396	4.59317	4.26067e-06	0.632759	0.299966	0.144316	0.532821	0.377171	0.40308
1698	Atp2a2	3.95306e-40	0.00167262	2.49207	2.79646	7.62823	11.351	9.96715	2.58151	5.03558e-39	0.0166519	1.30498	1.18441	1.82248	1.7019	1.61455
1699	Anapc5	1.53778e-22	0.831885	40.8449	45.8581	51.3737	55.8609	54.1929	42.3181	7.31302e-22	0.891514	0.323791	0.160543	0.442385	0.279137	0.349512
1700	Rnf34	1.05167e-06	0.10947	7.09458	7.93289	9.77789	9.27133	9.45963	7.34093	1.48457e-06	0.232238	0.413046	0.270876	0.343594	0.201423	0.326552
1701	Kdm2b	4.32935e-08	0.068339	0.30616	0.481792	0.641536	1.37576	1.10283	0.357771	6.45351e-08	0.16931	0.329716	0.147704	0.86306	0.681048	0.631093
1702	Orai1	6.84454e-108	0.000185498	9.8422	9.94874	28.2129	34.0982	31.9105	9.87351	5.83292e-105	0.00427494	1.42995	1.41584	1.69474	1.68063	1.59773
1703	Setd1b	2.1416e-17	0.00630387	3.21021	2.55314	5.46232	7.04799	6.45855	3.01712	7.33844e-17	0.0359738	0.618161	0.862957	0.934737	1.17953	0.892733
1704	Psmd9	1.5306e-08	0.833818	4.58659	5.14129	6.53069	6.93985	6.78775	4.7496	2.31971e-08	0.893025	0.430813	0.29424	0.507143	0.370569	0.437746
1705	Mlxip	7.1494e-11	0.496954	4.45137	4.41548	2.3129	2.65823	2.52986	4.44082	1.18975e-10	0.642861	-0.718524	-0.708995	-0.575472	-0.565943	-0.624213
1706	Diablo	5.95138e-20	0.91657	0.538571	0.826203	2.25212	2.50027	2.40802	0.623095	2.49718e-19	0.947222	1.07979	0.832535	1.18587	0.938617	1.07019
1707	Vps33a	5.13032e-24	0.6037	0.351536	0.547161	2.00753	2.3847	2.2445	0.409023	2.58702e-23	0.728612	1.15398	0.958957	1.32443	1.1294	1.2033
1708	Clip1	9.05187e-18	0.563131	43.0151	50.2984	27.6902	32.9922	31.0213	45.1554	3.23303e-17	0.698443	-0.61744	-0.838356	-0.372795	-0.593711	-0.527467
1709	Rsrc2	7.39662e-30	0.186605	13.8068	13.2797	23.0434	24.8416	24.1732	13.6519	5.03466e-29	0.330588	0.699382	0.751677	0.803439	0.855735	0.780801
1710	Denr	0.330294	0.76079	5.80538	6.32464	6.15107	6.47178	6.35256	5.95797	0.342012	0.843664	0.0714851	-0.0345974	0.134777	0.0286941	0.0795816
1711	Arl6ip4	0.0758405	0.261518	3.98363	4.4944	4.83386	4.69873	4.74896	4.13372	0.0827439	0.417274	0.227254	0.0864879	0.193444	0.0526775	0.163295
1712	Pitpnm2	0.502743	0.248634	10.9204	10.8508	10.0194	11.3791	10.8737	10.9	0.512976	0.402366	-0.11339	-0.10494	0.0544661	0.0629163	-0.0031959
1713	2810006K23Rik	0.336671	0.27561	4.14171	4.37061	5.04987	4.48402	4.69436	4.20898	0.348446	0.433189	0.234654	0.171817	0.0929832	0.0301461	0.128533
1714	Cdk2ap1	1.31464e-26	0.0715569	11.5429	14.1453	17.3844	18.118	17.8453	12.3076	7.52913e-26	0.174123	0.551619	0.279616	0.608069	0.336066	0.501957
1715	Sbno1	0.00023547	0.00429652	9.73485	9.05661	9.43183	12.335	11.2558	9.53554	0.00029879	0.0283397	-0.0413096	0.0528477	0.312916	0.407073	0.218201
1716	Kmt5a	0.000734181	0.00328282	11.9164	11.815	8.8207	12.6519	11.2277	11.8866	0.000909535	0.0242638	-0.395301	-0.38394	0.0799018	0.0912629	-0.0757128
1717	Rilpl1	1.19132e-06	0.290924	24.6667	25.019	18.8658	21.118	20.2808	24.7702	1.67837e-06	0.450528	-0.369605	-0.389276	-0.214675	-0.234346	-0.276151
1718	Tmed2	2.91587e-24	0.000123387	17.5124	17.219	21.1145	26.6448	24.589	17.4262	1.49423e-23	0.00319605	0.256502	0.279549	0.578519	0.601567	0.473771
1719	Eif2b1	2.56742e-12	0.417581	1.89672	2.37633	0.595525	0.771181	0.705884	2.03766	4.6306e-12	0.574713	-0.86039	-1.08143	-0.70971	-0.930745	-0.83244
1720	Atp6v0a2	4.76177e-22	0.184163	0.291901	0.559385	1.70984	2.47593	2.19115	0.370503	2.21869e-21	0.327702	1.06871	0.797229	1.4279	1.15642	1.21937
1721	Ncor2	2.01469e-16	0.00664447	1.62769	1.41775	2.93409	4.19647	3.72721	1.566	6.00953e-16	0.0369368	0.582235	0.702369	0.983735	1.10387	0.881468
1722	Scarb1	5.43554e-06	0.206089	1.54323	1.83567	2.27722	3.32892	2.93797	1.62917	7.41621e-06	0.354339	0.365809	0.208782	0.767345	0.610319	0.582848
1723	Ubc	6.96624e-12	0.000487344	72.1612	78.8329	66.0759	90.3414	81.3213	74.1217	1.22304e-11	0.00796127	-0.125285	-0.251189	0.320191	0.194287	0.132034
1724	Slc15a4	0.00190859	0.716647	5.05049	6.07714	5.77418	7.14008	6.63234	5.35218	0.00231201	0.812677	0.162996	-0.0631195	0.427992	0.201876	0.264873
1725	Ran	6.7261e-17	0.986774	8.41899	9.06166	12.2313	12.8895	12.6448	8.60785	2.16628e-16	0.992364	0.490311	0.395088	0.56035	0.465126	0.506069
1726	Adgrd1	5.54388e-10	0.144511	0.221278	0.418581	0.727224	1.34189	1.1134	0.279257	8.84903e-10	0.280594	0.500064	0.284007	0.939282	0.723225	0.72426
1727	Sfswap	2.80031e-14	0.00163162	3.83602	3.37601	5.32752	7.55965	6.7299	3.70084	6.00963e-14	0.0165729	0.387819	0.532022	0.823731	0.967933	0.71753
1728	Mrps17	0.296966	0.362287	63.8304	65.9174	69.7738	67.4369	68.3056	64.4437	0.308477	0.52289	0.126546	0.0808344	0.0781046	0.0323933	0.0827183
1729	Nipsnap2	1.96414e-22	0.00228945	150.379	132.488	179.635	186.177	183.745	145.121	9.30427e-22	0.0195498	0.254917	0.436371	0.30624	0.487693	0.33837
1730	Psph	4.85809e-10	0.993675	0.460105	0.675595	1.35878	1.57667	1.49568	0.523429	7.76747e-10	0.996833	0.691972	0.49337	0.819436	0.620835	0.712109
1731	Cct6a	1.49579e-30	0.157621	24.9802	25.3518	36.8468	40.5273	39.1591	25.0894	1.05174e-29	0.29654	0.542757	0.522269	0.676645	0.656157	0.622263
1732	Sumf2	0.0001499	0.891698	0.257545	0.581047	0.595696	0.88642	0.77835	0.352609	0.000191808	0.930936	0.343576	0.0133056	0.585041	0.254771	0.394794
1733	Phkg1	3.41729e-63	5.1575e-06	10.9996	10.9179	19.355	25.3646	23.1306	10.9756	1.70305e-61	0.000309523	0.762401	0.772252	1.13562	1.14547	1.01077
1734	Chchd2	0.000960968	0.122553	164.905	170.347	150.707	166.12	160.391	166.504	0.00118378	0.250636	-0.129067	-0.175628	0.0105296	-0.0360314	-0.0536376
1735	Zbed5	1.18389e-07	0.00183591	8.32499	9.1859	7.76453	6.75773	7.13199	8.57798	1.73262e-07	0.017539	-0.0894253	-0.216824	-0.265468	-0.392867	-0.236113
1736	Rabgef1	1.16693e-22	0.0935733	6.74117	8.34298	2.92683	3.12193	3.0494	7.21188	5.5743e-22	0.209245	-0.979187	-1.25052	-0.909233	-1.18056	-1.02
1737	Ndufa12-ps	0.127548	0.728478	397.988	373.487	397.251	362.954	375.703	390.788	0.136553	0.821333	-0.00266769	0.0887625	-0.132589	-0.0411589	-0.0566456
1738	Tmem248	0.00596796	0.398955	16.5028	17.5892	17.1757	19.5272	18.6531	16.822	0.0070286	0.55736	0.0544287	-0.032457	0.229954	0.143069	0.141094
1739	Sbds	2.36515e-05	0.922518	9.5134	10.0538	6.17749	6.84788	6.59868	9.67221	3.13271e-05	0.950999	-0.550679	-0.622993	-0.421855	-0.494169	-0.490038
1740	Galnt17	1.36739e-81	9.23002e-08	0.285359	0.75803	4.08182	7.43492	6.18848	0.424258	2.42769e-79	1.54232e-05	1.98317	1.53139	2.7142	2.26242	2.33548
1741	Auts2	3.13267e-32	0.0411669	0.785856	1.5917	3.08322	5.05311	4.32085	1.02266	2.42256e-31	0.120098	1.19309	0.655808	1.76106	1.22378	1.3954
1742	Castor2	1.44619e-24	1.67853e-06	6.6784	6.09253	8.40635	12.6955	11.1011	6.50623	7.54713e-24	0.00013004	0.29283	0.407334	0.834822	0.949326	0.688975
1743	Gtf2i	3.2716e-06	0.0155899	12.341	13.0071	12.2507	16.1399	14.6942	12.5367	4.51654e-06	0.0632352	-0.00979575	-0.0800848	0.361495	0.291206	0.213353
1744	Rfc2	3.20506e-18	0.418961	2.41363	3.10015	5.79826	5.90127	5.86298	2.61537	1.19639e-17	0.575683	0.99386	0.729488	1.01556	0.751184	0.924692
1745	Eif4h	5.38101e-19	0.00154321	5.93963	5.25459	8.14071	10.1286	9.38964	5.73833	2.13686e-18	0.0160552	0.397446	0.547391	0.68134	0.831285	0.624684
1746	Eln	4.52432e-25	0.0364663	10.1711	6.82448	17.3809	17.2878	17.3224	9.18763	2.41127e-24	0.109656	0.718441	1.23214	0.711119	1.22482	0.846792
1747	Dnajc30	0.433082	0.60477	2.78643	3.3676	2.96101	3.23316	3.132	2.95721	0.444398	0.729387	0.0650301	-0.140972	0.160898	-0.0451044	0.0623546
1748	Mlxipl	1.27939e-24	1.22467e-07	3.30618	2.29672	4.49218	7.11152	6.13784	3.00954	6.69303e-24	1.86368e-05	0.35097	0.736345	0.913564	1.29894	0.83205
1749	Bcl7b	0.38911	0.14199	5.14368	4.36444	4.94773	5.45731	5.26788	4.91469	0.400434	0.277023	-0.0467642	0.148912	0.0718304	0.267506	0.0836755
1750	Baz1b	0.150763	0.183961	1.74101	1.66186	1.72882	2.31706	2.09839	1.71775	0.16044	0.327563	-0.00643238	0.0358415	0.275195	0.317469	0.189106
1751	Hip1	2.24916e-39	0.000938226	3.04387	2.68983	7.20522	9.68383	8.76246	2.93983	2.71492e-38	0.0121513	1.02081	1.15299	1.40162	1.5338	1.30911
1752	Mdh2	0.0526847	0.268962	55.7146	50.7986	56.5752	54.7963	55.4576	54.27	0.0582862	0.426119	0.0217266	0.152535	-0.023551	0.107258	0.0306707
1753	Hspb1	5.29941e-35	0.000361045	33.5421	31.6696	44.4307	51.6155	48.9447	32.9919	4.83529e-34	0.0065293	0.39531	0.475717	0.607131	0.687539	0.555142
1754	Ywhag	0.00333128	0.00369806	184.554	179.706	151.962	202.387	183.643	183.13	0.00398165	0.0257871	-0.278669	-0.240471	0.132387	0.170585	0.00401457
1755	Rasa4	4.68997e-17	0.258475	1.04784	1.54688	2.99325	4.18522	3.74213	1.19449	1.54138e-16	0.414301	0.963458	0.648831	1.3403	1.02567	1.11165
1756	Polr2j	0.105374	0.322227	2.587	3.37423	2.46373	2.7503	2.64377	2.81834	0.113627	0.483114	-0.0504524	-0.336703	0.0642259	-0.222024	-0.0675118
1757	Alkbh4	0.00567517	0.929219	0.23562	0.38954	0.450043	0.620688	0.557254	0.280851	0.0066921	0.954993	0.230861	0.0614885	0.391372	0.222	0.281903
1758	Prkrip1	0.235774	0.261159	1.73513	2.37151	1.86928	1.99754	1.94986	1.92213	0.247051	0.416857	0.0690823	-0.232707	0.132174	-0.169616	0.0136264
1759	Cux1	7.49425e-11	0.0196438	30.0866	30.9209	33.9153	41.2461	38.521	30.3318	1.24617e-10	0.0733139	0.167565	0.129359	0.442523	0.404317	0.334993
1760	Fis1	0.274194	0.12787	90.2998	93.7892	97.1522	92.7179	94.3663	91.3252	0.285658	0.258041	0.104409	0.0502984	0.0377127	-0.0163983	0.0467545
1761	Plod3	2.50628e-15	0.072464	1.09186	0.975006	2.85148	3.81561	3.45721	1.05752	6.25066e-15	0.175837	0.880627	0.963554	1.20293	1.28586	1.11524
1762	Ache	1.45387e-84	0.000318063	0.36004	0.618691	5.54036	7.83424	6.98154	0.436047	3.1769e-82	0.0060503	2.26572	2.01454	2.69946	2.44828	2.47456
1763	Srrt	3.89881e-25	4.18218e-05	3.57761	2.94254	6.01343	9.32537	8.09423	3.39099	2.09098e-24	0.00147275	0.615526	0.830995	1.17353	1.389	1.05041
1764	Trip6	1.71712e-38	0.0482641	1.80358	1.83739	7.48557	9.51599	8.76123	1.81351	1.9642e-37	0.133671	1.59774	1.58045	1.90724	1.88995	1.79469
1765	Pop7	6.13991e-12	0.411096	0.651907	1.18343	2.47284	2.59824	2.55162	0.8081	1.0822e-11	0.568461	1.07198	0.669522	1.12316	0.720695	0.974005
1766	Gigyf1	1.02905e-23	0.000117226	4.09458	3.31121	6.43914	9.00428	8.05075	3.86438	5.13741e-23	0.0030886	0.546173	0.787042	0.973583	1.21445	0.895781
1767	Mospd3	5.0413e-11	0.0190827	13.5153	13.0698	16.2508	19.3873	18.2214	13.3844	8.4355e-11	0.071809	0.249085	0.29406	0.490097	0.535072	0.418208
1768	Pcolce	2.25983e-52	0.0617696	2.40061	2.96572	9.76202	12.291	11.3509	2.56667	5.61466e-51	0.158889	1.66208	1.44029	1.96658	1.74479	1.79197
1769	Cops6	0.126132	0.362789	37.8475	37.8768	39.046	41.9725	40.8846	37.8561	0.135105	0.523482	0.0438362	0.0427498	0.145591	0.144505	0.10828
1770	Taf6	0.0847892	0.707701	1.21092	1.60335	0.819919	1.06758	0.975516	1.32624	0.092118	0.806718	-0.280774	-0.516497	-0.0967065	-0.332429	-0.235771
1771	Lamtor4	1.0294e-10	0.167125	7.94865	8.87593	11.623	11.2373	11.3807	8.22114	1.70055e-10	0.307845	0.496317	0.354071	0.451538	0.309292	0.425072
1772	Pdgfa	3.53812e-13	0.0210859	3.97309	3.84558	5.83482	7.73458	7.02839	3.93562	6.78179e-13	0.0767574	0.45876	0.496233	0.812595	0.850068	0.701878
1773	Sun1	2.62193e-21	0.449073	0.254903	0.446943	1.83944	1.80108	1.81534	0.311336	1.18348e-20	0.602671	1.17803	0.9726	1.15841	0.952976	1.10227
1774	Get4	1.56454e-14	0.01972	2.91104	3.13117	3.91688	5.3392	4.81048	2.97573	3.47757e-14	0.0734821	0.330189	0.251191	0.696747	0.617749	0.547438
1775	Cox19	0.114878	0.141341	8.4562	8.60632	10.0669	8.7537	9.24186	8.50031	0.123408	0.27603	0.226923	0.204198	0.0446895	0.021965	0.108431
1776	3110082I17Rik	0.000317004	0.852982	1.56926	2.14567	2.69939	3.15482	2.98552	1.73864	0.000399691	0.905132	0.525932	0.233921	0.693433	0.401421	0.541308
1777	Gpr146	1.00567e-27	0.00164734	2.34676	2.81742	3.98969	6.2848	5.43165	2.48507	6.09121e-27	0.0166322	0.576183	0.386353	1.12212	0.932294	0.884001
1778	Mafk	0.000463837	0.00772536	5.1002	4.8333	4.80927	6.91451	6.13193	5.02177	0.000579592	0.0408409	-0.0705002	-0.00595607	0.375642	0.440187	0.244105
1779	Eif3b	4.90405e-19	0.0327128	5.92906	6.16086	8.22665	10.1391	9.42817	5.99717	1.95474e-18	0.102267	0.413148	0.365674	0.684898	0.637424	0.575641
1780	Gna12	2.4747e-13	0.0036939	0.955196	1.15648	1.50043	3.08091	2.4934	1.01435	4.81602e-13	0.0257816	0.354861	0.213494	1.06158	0.920211	0.794321
1781	Wipi2	0.17294	0.748745	1.82093	2.38576	1.85455	2.2712	2.11632	1.98691	0.183012	0.835184	0.0170941	-0.246216	0.213653	-0.0496571	0.0611916
1782	Actb	5.64968e-46	4.75917e-05	151.727	138.702	456.579	699.252	609.044	147.899	9.88636e-45	0.00158428	1.58307	1.71167	2.19692	2.32552	2.03458
1783	Fscn1	1.23559e-42	0.000212229	0.295935	0.354947	5.68997	10.0484	8.42828	0.313277	1.82491e-41	0.00474702	2.36801	2.30376	3.09178	3.02753	2.84382
1784	Zdhhc4	4.91877e-19	0.555118	3.61346	4.57351	6.63394	7.19146	6.98422	3.89558	1.95969e-18	0.691508	0.72658	0.453843	0.828273	0.555536	0.705672
1785	Kdelr2	7.30263e-49	0.0594089	25.9427	26.4611	47.2085	53.6388	51.2485	26.095	1.4924e-47	0.154874	0.839394	0.811896	1.02003	0.992535	0.947361
1786	Daglb	1.91008e-24	0.000566359	0.445652	0.468716	1.70889	3.39012	2.76516	0.452429	9.87127e-24	0.00872787	0.905981	0.883146	1.60254	1.57971	1.37424
1787	Rac1	1.48525e-30	0.0607436	21.5175	23.5004	28.4048	33.5216	31.6195	22.1002	1.0452e-29	0.157056	0.385	0.263244	0.616449	0.494692	0.497828
1788	Fam220a	0.014393	0.624269	11.5077	12.1622	10.0961	10.2479	10.1914	11.7	0.0165521	0.745415	-0.172764	-0.246348	-0.153159	-0.226743	-0.182431
1789	Eif2ak1	1.36214e-05	0.50146	15.386	16.7444	18.8791	19.264	19.1209	15.7852	1.82518e-05	0.645945	0.278783	0.163887	0.306449	0.191554	0.261504
1790	Aimp2	1.76299e-13	2.60105e-06	15.576	21.9378	15.0005	15.3928	15.247	17.4455	3.48428e-13	0.000175922	-0.050978	-0.51961	-0.016032	-0.484664	-0.183095
1791	Ccz1	0.215513	0.874208	1.29886	1.60878	1.55146	1.796	1.7051	1.38993	0.226517	0.918111	0.150408	-0.0320515	0.282447	0.0999881	0.178712
1792	Tecpr1	0.25844	0.16565	2.90565	2.91815	2.22765	3.11021	2.78214	2.90932	0.269673	0.306285	-0.275076	-0.279686	0.0736506	0.069041	-0.0477153
1793	Bri3	4.47442e-05	0.000134191	4.83432	3.65119	4.58348	5.77486	5.33199	4.48664	5.8537e-05	0.00337337	-0.0634001	0.263562	0.215628	0.54259	0.206735
1794	Arpc1a	1.24202e-06	0.615662	1.21894	1.55137	2.25768	2.85609	2.63365	1.31663	1.74835e-06	0.738344	0.553972	0.352572	0.797266	0.595866	0.64939
1795	Pdap1	9.68666e-09	0.000281316	14.8761	14.7733	14.4249	19.3169	17.4984	14.8459	1.4778e-08	0.00568099	-0.0415891	-0.0322199	0.355827	0.365197	0.223296
1796	Bud31	2.44025e-05	0.272689	4.29044	4.48704	6.12006	5.61328	5.80166	4.34821	3.23016e-05	0.430184	0.428503	0.375862	0.321979	0.269339	0.346832
1797	Atp5j2	4.45756e-16	0.293345	119.839	113.122	153.191	139.408	144.531	117.865	1.25578e-15	0.453206	0.351634	0.434138	0.216536	0.299041	0.292003
1798	Gtf3a	0.691126	0.233373	6.2109	5.75006	5.72893	6.36322	6.12744	6.07548	0.697841	0.385726	-0.0998023	-0.0045241	0.0301581	0.125436	0.0105559
1799	Polr1d	1.26361e-09	0.0132134	18.944	22.096	24.1035	23.7397	23.8749	19.8703	1.99195e-09	0.0566667	0.331932	0.120245	0.310872	0.0991847	0.253244
1800	Flt1	4.39737e-06	0.000679473	8.91372	7.05574	5.78302	7.09727	6.60873	8.36774	6.02773e-06	0.00977141	-0.5475	-0.24809	-0.291991	0.00741856	-0.300046
1801	Pomp	1.55511e-42	0.862201	66.7296	74.828	109.032	118.21	114.798	69.1094	2.27709e-41	0.911849	0.700064	0.537121	0.815644	0.6527	0.723932
1802	Slc7a1	9.68546e-30	0.138783	0.214483	0.486166	3.13956	4.317	3.87931	0.29432	6.54037e-29	0.272688	1.76914	1.47788	2.13027	1.83902	1.91448
1803	Ubl3	0.0472384	0.37373	6.32214	6.45561	4.93075	5.77423	5.46069	6.36136	0.0524584	0.534204	-0.304049	-0.330112	-0.112208	-0.13827	-0.188285
1804	Hmgb1	0.0724265	0.416235	5.91951	6.02676	6.24384	6.88196	6.64475	5.95103	0.0792119	0.573139	0.0660847	0.0438947	0.187884	0.165694	0.137243
1805	Uspl1	1.41175e-05	0.583712	2.87155	3.28838	3.91555	4.67934	4.39542	2.99404	1.88929e-05	0.713379	0.344441	0.196921	0.552812	0.405292	0.433886
1806	Hsph1	5.93701e-12	0.442681	5.87292	6.47574	3.29855	3.31144	3.30665	6.05006	1.04687e-11	0.597581	-0.677073	-0.798367	-0.672753	-0.794047	-0.711071
1807	Fry	3.24438e-06	0.133629	3.53431	3.38144	4.57278	5.44487	5.12069	3.48939	4.48041e-06	0.265699	0.297514	0.346991	0.507269	0.556746	0.447176
1808	Pds5b	1.60775e-21	0.79137	2.96009	2.89931	6.75524	6.50057	6.59524	2.94223	7.3347e-21	0.863626	0.969636	0.991951	0.921465	0.94378	0.946082
1809	Gng11	0.000758819	0.552062	5.73916	5.20923	7.32571	7.34235	7.33617	5.58343	0.000938965	0.68943	0.305006	0.42316	0.307887	0.426041	0.340545
1810	Col1a2	1.34519e-69	3.627e-05	22.8623	32.8921	118.186	185.25	160.32	25.8096	1.07138e-67	0.00134388	2.32041	1.81419	2.96444	2.45822	2.58911
1811	Casd1	5.23089e-09	0.761832	3.63583	4.10949	5.25423	5.92089	5.67308	3.77502	8.04361e-09	0.844257	0.432006	0.291653	0.578132	0.437779	0.482846
1812	Sgce	1.33668e-28	0.215385	1.22845	1.06955	3.75991	4.2085	4.04175	1.18175	8.48192e-28	0.365384	1.0949	1.20162	1.22483	1.33155	1.20844
1813	Pon3	0.0277898	0.22295	1.56327	1.91925	2.45343	2.21322	2.30251	1.66788	0.0314258	0.373864	0.430047	0.24243	0.326036	0.138419	0.307872
1814	Pon2	0.0176375	0.665214	11.3407	12.4581	12.4958	13.1731	12.9214	11.6691	0.0201944	0.776025	0.129092	0.00403347	0.199737	0.0746784	0.135991
1815	Pdk4	2.1612e-15	0.401663	36.5565	30.8119	3.92516	4.43255	4.24394	34.8684	5.45065e-15	0.560192	-2.93082	-2.69132	-2.78936	-2.54987	-2.77399
1816	Sem1	1.27223e-11	0.00364361	10.2747	11.1209	15.2454	13.0613	13.8732	10.5234	2.20052e-11	0.0255099	0.526939	0.422535	0.318646	0.214242	0.368155
1817	Sdhaf3	0.00372781	0.325495	1.20078	2.07797	1.32027	1.80542	1.62508	1.45855	0.00444314	0.486289	0.0762768	-0.40769	0.350203	-0.133764	0.0945505
1818	C1galt1	0.0600749	0.014592	3.1951	2.54207	2.33886	2.94073	2.717	3.0032	0.0661274	0.0606304	-0.329349	-0.0852349	-0.0902428	0.153871	-0.107016
1819	Umad1	5.9405e-08	0.147473	0.307369	0.628165	1.04966	1.03341	1.03945	0.401638	8.80587e-08	0.28363	0.648721	0.33214	0.637232	0.320651	0.541066
1820	Ndufa4	1.22495e-35	5.17394e-05	95.8763	94.1572	148.18	121.909	131.675	95.3711	1.17424e-34	0.00168291	0.622836	0.648667	0.34338	0.36921	0.461222
1821	Tmem106b	0.05311	0.424295	25.507	23.726	27.4879	27.3632	27.4096	24.9836	0.0587112	0.579913	0.103975	0.204321	0.097648	0.197995	0.128774
1822	Bmt2	0.000492223	0.982193	0.328219	0.400965	0.782279	0.86046	0.831398	0.349596	0.000614431	0.989205	0.42423	0.347302	0.486166	0.409238	0.440417
1823	2610001J05Rik	0.000241013	0.800194	5.76101	5.39851	7.46522	6.91702	7.1208	5.65449	0.000305687	0.869249	0.324307	0.403811	0.227718	0.307222	0.287294
1824	Ppp1r3a	2.40254e-09	0.645592	7.84255	7.93008	4.00726	3.48308	3.67793	7.86828	3.74922e-09	0.761065	-0.820442	-0.834652	-0.979972	-0.994183	-0.922782
1825	Cav1	3.72553e-07	0.675533	15.6618	14.1052	19.3899	18.4106	18.7746	15.2044	5.34134e-07	0.783677	0.291311	0.432813	0.220303	0.361804	0.28727
1826	Capza2	5.00242e-36	0.528212	31.1715	35.72	42.908	46.2348	44.9982	32.5082	4.90007e-35	0.669655	0.448699	0.257918	0.554065	0.363284	0.457064
1827	St7	0.000342781	0.302301	0.230346	0.320855	0.399615	0.677432	0.57416	0.256943	0.000431425	0.463014	0.185966	0.0835582	0.44719	0.344782	0.324663
1828	Tspan12	7.4801e-31	0.285158	22.1103	17.5752	12.5797	9.87527	10.8806	20.7776	5.33434e-30	0.444343	-0.767084	-0.451923	-1.08749	-0.772325	-0.874241
1829	Cped1	2.64354e-15	0.946035	3.89004	4.37615	7.44336	7.99153	7.78776	4.03289	6.57184e-15	0.964483	0.787972	0.651245	0.87872	0.741994	0.80411
1830	Ndufa5	2.57304e-07	0.653718	40.8131	39.3355	50.587	47.7065	48.7773	40.3789	3.71841e-07	0.767142	0.303053	0.354958	0.220159	0.272064	0.266592
1831	Asb15	1.05623e-45	0.731923	0.590862	1.03887	4.95816	5.61131	5.36852	0.722515	1.81476e-44	0.823969	1.90506	1.54709	2.05513	1.69716	1.88644
1832	Lmod2	2.44866e-06	0.0681919	3.91659	3.44166	5.0009	5.87101	5.54756	3.77703	3.39917e-06	0.169174	0.287521	0.43408	0.482863	0.629423	0.454845
1833	Wasl	3.66298e-18	0.150135	0.395629	0.671559	1.41638	2.17162	1.89087	0.476713	1.36136e-17	0.287322	0.791933	0.531655	1.1843	0.924024	0.969116
1834	Arf5	5.13277e-35	0.000104675	5.73042	6.23596	9.47551	14.3542	12.5407	5.87898	4.70339e-34	0.00286603	0.638251	0.533763	1.18987	1.08538	0.977032
1835	Snd1	1.23528e-33	0.000192136	5.58199	6.05951	9.19923	13.7605	12.0649	5.72232	1.04228e-32	0.00440156	0.631865	0.530821	1.16514	1.0641	0.958669
1836	Rbm28	6.11674e-13	0.0117431	3.95763	3.46571	5.61701	7.06979	6.52975	3.81308	1.14994e-12	0.0529217	0.416528	0.567291	0.702879	0.853643	0.645643
1837	Hilpda	6.13463e-26	0.593086	0.265405	0.554875	3.20009	3.21366	3.20861	0.350468	3.42142e-25	0.719675	1.73082	1.43362	1.73547	1.43827	1.63989
1838	Calu	3.06062e-32	0.224687	6.65928	6.55597	12.2803	13.4122	12.9915	6.62892	2.369e-31	0.375669	0.794006	0.813597	0.912013	0.931604	0.874995
1839	Flnc	9.03717e-08	3.38575e-05	28.6473	28.2851	24.8729	35.0172	31.2463	28.5409	1.32876e-07	0.0012881	-0.196462	-0.178729	0.280784	0.298516	0.126419
1840	Atp6v1f	2.33193e-31	0.0259954	29.1661	35.079	43.7166	44.6003	44.2718	30.9037	1.71909e-30	0.087842	0.567879	0.309649	0.596112	0.337881	0.504888
1841	Tnpo3	2.55167e-11	0.0134607	7.14329	7.36133	8.81327	11.9548	10.787	7.20736	4.34038e-11	0.0575286	0.269122	0.231001	0.669805	0.631684	0.522208
1842	Nrf1	0.0564836	0.331667	0.922188	1.19473	0.785338	1.43255	1.19197	1.00228	0.0623191	0.492244	-0.106552	-0.297845	0.339723	0.14843	0.130584
1843	Ube2h	0.000942553	0.00726447	13.5095	13.6183	12.1232	15.5396	14.2696	13.5415	0.00116176	0.0392567	-0.144879	-0.155659	0.188926	0.178146	0.0704908
1844	Klhdc10	3.11757e-12	0.000913394	6.41102	6.44158	7.11544	10.0725	8.97326	6.42	5.59443e-12	0.0119902	0.130996	0.12506	0.579233	0.573297	0.426646
1845	Tmem209	0.00461171	0.0278136	1.0342	0.956795	0.889886	1.91783	1.53571	1.01145	0.0054691	0.0916348	-0.106163	-0.0501932	0.520431	0.576401	0.334152
1846	2210408F21Rik	1.00105e-08	0.821627	0.395201	0.53724	1.18908	1.2711	1.24062	0.436941	1.52666e-08	0.884638	0.649854	0.509985	0.702921	0.563051	0.640894
1847	Mkln1	9.85976e-18	0.327788	9.16525	10.409	13.8794	14.1216	14.0315	9.53072	3.50835e-17	0.487961	0.549671	0.383149	0.572962	0.40644	0.513389
1848	Podxl	0.0959217	0.19814	2.29925	2.54545	1.82622	2.76633	2.41687	2.3716	0.10375	0.34518	-0.223267	-0.327099	0.191022	0.0871907	0.0192402
1849	Chchd3	5.02292e-25	0.227037	48.0503	45.9087	37.9299	32.8553	34.7417	47.421	2.67199e-24	0.377995	-0.333383	-0.268974	-0.53488	-0.470471	-0.438024
1850	Exoc4	0.263301	0.872073	2.50451	3.10594	2.40555	2.91645	2.72654	2.68125	0.274578	0.91734	-0.0413269	-0.269827	0.160334	-0.0681658	0.0176399
1851	Akr1b3	9.97972e-06	0.00161832	9.42181	11.8545	10.893	10.9454	10.9259	10.1367	1.34419e-05	0.0165165	0.190505	-0.112161	0.196851	-0.105815	0.0987823
1852	Akr1b10	0.0766155	0.323592	1.377	1.57424	2.06367	1.83954	1.92285	1.43496	0.0835466	0.484609	0.366123	0.251115	0.256516	0.141509	0.263481
1853	Bpgm	0.0604266	0.489169	12.4808	12.2221	14.3619	13.306	13.6985	12.4047	0.0664802	0.637026	0.188459	0.216409	0.0857147	0.113664	0.132924
1854	Cald1	4.97659e-33	0.00730734	10.5421	9.34785	19.2088	22.916	21.5379	10.1912	4.01995e-32	0.0393885	0.808078	0.965652	1.05107	1.20864	1.01
1855	1810058I24Rik	1.04469e-28	0.169791	14.2181	15.872	24.3879	23.8432	24.0457	14.7042	6.6588e-28	0.311175	0.738347	0.589505	0.70706	0.558218	0.673416
1856	Mtpn	4.69461e-45	0.0576264	1.06027	1.47542	5.23071	6.93628	6.30227	1.18227	7.78355e-44	0.151759	1.59656	1.33172	1.94563	1.68079	1.74252
1857	Trim24	0.00476668	0.00660459	8.28094	7.81759	7.3448	9.89685	8.94818	8.14478	0.00564739	0.0368836	-0.153393	-0.0795062	0.231568	0.305454	0.121484
1858	Ubn2	0.00755355	0.314805	5.90445	6.34891	6.50016	8.03649	7.46539	6.03506	0.00883009	0.475285	0.119394	0.0293904	0.388237	0.298233	0.267015
1859	Fmc1	2.47269e-17	0.391376	35.0515	30.65	45.2526	42.8986	43.7736	33.7581	8.40202e-17	0.551291	0.359476	0.54733	0.284114	0.471969	0.365301
1860	Luc7l2	2.19246e-31	5.35107e-06	7.85278	7.62587	10.7872	15.6371	13.8343	7.7861	1.62189e-30	0.000316679	0.413016	0.450475	0.910205	0.947665	0.755639
1861	Hipk2	2.88905e-15	0.0093468	2.9952	2.1262	0.493565	0.936785	0.772028	2.73983	7.15088e-15	0.0459363	-1.41951	-1.06565	-1.0446	-0.690746	-1.07757
1862	Kdm7a	0.410173	0.478846	6.4309	6.16641	5.58717	5.88679	5.77542	6.35317	0.421499	0.627765	-0.173877	-0.12159	-0.109705	-0.0574181	-0.118058
1863	Mkrn1	3.99411e-26	0.0686106	1.15322	1.13373	4.45929	3.52532	3.8725	1.14749	2.25118e-25	0.169505	1.34222	1.35533	1.07153	1.08464	1.18201
1864	Ndufb2	0.00441182	0.118909	48.9368	47.2249	49.9338	44.0164	46.2161	48.4338	0.00524008	0.246158	0.0285199	0.0788458	-0.149654	-0.0993281	-0.066219
1865	Mrps33	3.96494e-15	0.330374	9.41814	9.0337	13.2435	12.0748	12.5093	9.30517	9.61014e-15	0.490825	0.451205	0.505449	0.327695	0.381939	0.39058
1866	Ssbp1	0.432945	0.197167	16.4366	16.752	17.1759	15.4478	16.0902	16.5292	0.444364	0.344185	0.0599129	0.0340493	-0.0842224	-0.110086	-0.0365965
1867	Gstk1	0.0389137	0.697624	10.9178	9.44076	11.4115	10.2924	10.7084	10.4837	0.0434858	0.799187	0.0585642	0.249453	-0.0777652	0.113124	0.0279508
1868	Clcn1	0.000973076	0.21079	2.26189	2.25107	2.89531	3.71593	3.41089	2.25871	0.001198	0.359847	0.256034	0.260825	0.531837	0.536628	0.436768
1869	Zyx	1.45914e-13	0.0687069	1.01902	1.07206	2.54833	3.72477	3.28746	1.03461	2.90223e-13	0.169569	0.813486	0.776075	1.22659	1.18918	1.07537
1870	Cul1	1.83922e-13	0.719801	8.47351	8.6451	12.1425	12.6846	12.4831	8.52393	3.62821e-13	0.814844	0.472273	0.446376	0.530585	0.504688	0.501525
1871	Zfp467	0.0163891	0.439635	1.99515	2.60808	1.52693	1.80567	1.70205	2.17526	0.0187903	0.594883	-0.245243	-0.513847	-0.0942824	-0.362886	-0.232821
1872	Atp6v0e2	3.12889e-07	0.183495	1.28708	1.7256	2.91111	2.67795	2.76462	1.41594	4.50108e-07	0.327006	0.774074	0.521004	0.685397	0.432328	0.63992
1873	Rarres2	1.3178e-06	0.00652291	4.26401	4.94133	7.08298	5.66151	6.18991	4.46305	1.8535e-06	0.0366435	0.618723	0.444102	0.339686	0.165064	0.396267
1874	Repin1	1.25542e-08	0.0142149	3.65119	3.49525	4.51066	6.16708	5.55134	3.60537	1.90708e-08	0.0595571	0.244624	0.293821	0.623785	0.672983	0.508474
1875	Gimap4	3.02938e-11	0.0973081	1.63743	1.63264	3.84469	2.99987	3.31391	1.63602	5.13349e-11	0.21427	0.87727	0.879893	0.600819	0.603442	0.710633
1876	Tmem176b	9.09616e-49	0.485726	9.30969	12.8434	28.9706	34.4289	32.3999	10.3481	1.84565e-47	0.633898	1.53955	1.11435	1.78093	1.35573	1.55739
1877	Tmem176a	8.07579e-42	0.00417427	5.60423	5.75815	15.1803	20.5496	18.5537	5.64946	1.12638e-40	0.0278568	1.29278	1.25954	1.7062	1.67296	1.55613
1878	Malsu1	1.88395e-10	7.61901e-06	78.9109	88.7863	76.6931	66.9968	70.6012	81.8129	3.07097e-10	0.00040836	-0.0406074	-0.20871	-0.232926	-0.401029	-0.209873
1879	Cycs	7.60797e-12	0.0222737	113.826	100.644	130.091	104.53	114.032	109.953	1.33268e-11	0.0795544	0.191109	0.36704	-0.1218	0.0541309	0.0520867
1880	Hnrnpa2b1	3.22427e-23	0.332868	49.6061	57.861	67.2294	71.9092	70.1696	52.0319	1.57915e-22	0.493254	0.431084	0.213082	0.52679	0.308789	0.424402
1881	Snx10	9.67588e-30	0.694623	0.279559	0.613526	2.91257	3.07354	3.0137	0.377698	6.53909e-29	0.797348	1.61247	1.2779	1.67063	1.33606	1.54267
1882	Hibadh	0.131205	0.0478616	23.4925	20.74	22.4205	23.0538	22.8184	22.6837	0.140327	0.132989	-0.064568	0.107417	-0.0260756	0.145909	0.00818308
1883	Tax1bp1	2.45958e-13	0.870809	15.7474	16.7181	21.0773	21.8117	21.5387	16.0326	4.7888e-13	0.916516	0.398629	0.317339	0.445842	0.364553	0.404105
1884	Wipf3	9.40887e-07	0.157397	4.89614	4.64803	6.15913	6.91725	6.63543	4.82323	1.32995e-06	0.296297	0.280013	0.342036	0.425228	0.487251	0.39089
1885	Znrf2	0.395449	0.270564	3.60438	3.42439	3.59446	4.09945	3.91173	3.55149	0.406859	0.428021	-0.00310954	0.0544167	0.147336	0.204862	0.109894
1886	Gars	9.8682e-13	0.0910865	22.2325	20.8649	27.3669	29.0602	28.4308	21.8306	1.82899e-12	0.205626	0.288068	0.375595	0.371714	0.459241	0.366358
1887	Inmt	0.745946	0.541425	6.93884	6.91003	7.01787	6.44846	6.66013	6.93037	0.751235	0.680634	0.0142919	0.0195361	-0.0919858	-0.0867417	-0.0500206
1888	Aqp1	6.65025e-06	0.356086	18.4998	19.1461	13.6463	15.7824	14.9884	18.6897	9.03738e-06	0.517138	-0.412916	-0.459962	-0.216508	-0.263554	-0.300419
1889	Fkbp9	2.04713e-14	0.227334	6.45178	7.17071	8.82143	10.6021	9.9402	6.66305	4.48243e-14	0.378239	0.398348	0.265472	0.638733	0.505857	0.513649
1890	Nt5c3	0.0876169	0.309123	33.7866	35.6275	32.136	31.5612	31.7749	34.3276	0.0951052	0.470168	-0.0701313	-0.144525	-0.0953786	-0.169772	-0.108204
1891	Pyurf	6.06137e-10	0.63726	6.13017	5.94769	8.87516	9.11955	9.0287	6.07655	9.66417e-10	0.754688	0.469866	0.507269	0.505136	0.54254	0.503017
1892	Abcg2	8.63813e-28	0.613693	0.385636	0.799751	2.89441	3.0876	3.01579	0.507328	5.2544e-27	0.736709	1.49086	1.11361	1.56071	1.18346	1.41369
1893	Herc3	0.039722	0.0943572	1.18424	1.81755	1.0244	0.927148	0.963301	1.37034	0.0443716	0.21036	-0.109634	-0.476945	-0.180663	-0.547974	-0.271815
1894	Fam13a	5.84644e-21	0.325109	1.33604	1.18826	3.53718	3.88524	3.75585	1.29261	2.59632e-20	0.486067	0.95773	1.05201	1.06436	1.15864	1.05271
1895	Tigd2	0.15939	0.455933	5.21589	5.64891	3.81021	5.04081	4.58336	5.34314	0.169093	0.608434	-0.369863	-0.467018	-0.0412209	-0.138376	-0.184064
1896	Gng12	2.04232e-36	0.454553	1.06596	1.71565	4.41169	4.69029	4.58673	1.25687	2.05728e-35	0.607544	1.38927	0.994781	1.46169	1.0672	1.30768
1897	Serbp1	3.70977e-06	0.0715646	26.1487	25.7012	28.77	32.172	30.9074	26.0172	5.10985e-06	0.174123	0.132978	0.156953	0.289085	0.313061	0.240013
1898	Rpia	0.0245033	0.0923505	7.48686	7.49013	7.36478	8.96945	8.37295	7.48782	0.0278201	0.207326	-0.0209021	-0.0214588	0.232283	0.231726	0.143109
1899	Smyd1	1.04341e-14	0.593745	115.319	136.07	125.961	143.555	137.015	121.417	2.37943e-14	0.720176	0.126305	-0.110525	0.313532	0.0767015	0.173021
1900	Krcc1	0.388872	0.144193	4.67462	4.25088	3.92	4.46301	4.26116	4.5501	0.400237	0.28033	-0.205867	-0.0939024	-0.0548276	0.0571368	-0.0771337
1901	Rmnd5a	2.19982e-05	0.586116	10.3078	12.3671	9.77515	12.3544	11.3956	10.9129	2.9178e-05	0.714657	-0.0696087	-0.310981	0.239994	-0.00137761	0.057298
1902	Chmp3	2.24701e-17	0.73323	11.7446	12.5563	17.155	17.5471	17.4014	11.9831	7.68112e-17	0.825004	0.510485	0.421405	0.541311	0.452231	0.503176
1903	Reep1	1.31838e-25	0.457575	4.3855	6.0783	8.08129	9.21542	8.79383	4.88295	7.22988e-25	0.609767	0.753816	0.359494	0.923595	0.529273	0.735334
1904	Mrpl35	0.018126	0.33442	10.6672	9.72571	11.7989	11.8873	11.8544	10.3906	0.0207258	0.494517	0.133561	0.254951	0.143486	0.264876	0.174429
1905	Immt	3.31709e-11	0.0302158	67.539	66.8557	76.4255	85.8767	82.3634	67.3382	5.60877e-11	0.0973163	0.175883	0.190337	0.342044	0.356498	0.286722
1906	Ptcd3	2.6237e-07	0.26461	5.56659	5.1206	3.64068	3.87311	3.78671	5.43553	3.78905e-07	0.421024	-0.500809	-0.399337	-0.430303	-0.328831	-0.427026
1907	St3gal5	1.66641e-53	4.80515e-05	36.7032	29.9993	10.8795	14.6606	13.2551	34.7332	4.42402e-52	0.00158719	-1.66621	-1.38376	-1.26755	-0.985092	-1.32579
1908	Tmem150a	0.000310504	0.715625	1.92901	2.10889	0.770331	1.13107	0.996975	1.98187	0.000391611	0.81195	-0.726393	-0.812379	-0.458832	-0.544818	-0.5784
1909	Rnf181	1.00002e-21	0.363966	6.0642	8.321	10.0591	11.485	10.9549	6.72738	4.59665e-21	0.524361	0.646635	0.246677	0.821592	0.421634	0.629553
1910	Vamp5	1.00424e-25	0.129465	16.9479	19.9226	10.1906	11.1481	10.7921	17.8221	5.53566e-25	0.259967	-0.681536	-0.902779	-0.563092	-0.784335	-0.674601
1911	Vamp8	4.74079e-33	0.0986207	13.27	14.835	24.0076	23.0499	23.4059	13.7299	3.8404e-32	0.215997	0.809385	0.659247	0.753051	0.602914	0.728486
1912	Mat2a	5.00726e-12	0.000238932	14.5691	13.2117	16.2633	21.499	19.5528	14.1702	8.88257e-12	0.00503511	0.149023	0.280634	0.531175	0.662785	0.43809
1913	Retsat	1.10335e-22	0.974888	5.98362	5.74807	2.51464	2.30077	2.38027	5.9144	5.27653e-22	0.98436	-0.990599	-0.941099	-1.08117	-1.03167	-1.03247
1914	Tgoln1	1.40955e-05	0.695992	7.09736	7.07195	9.21699	9.57805	9.44384	7.08989	1.88693e-05	0.797854	0.335448	0.339981	0.385551	0.390084	0.368459
1915	Tcf7l1	0.00107393	0.320223	2.74987	3.61171	1.83102	2.07379	1.98354	3.00313	0.00131836	0.48121	-0.405518	-0.703977	-0.286825	-0.585284	-0.424102
1916	Kcmf1	6.7831e-49	0.000468707	70.0401	83.333	49.7416	52.5635	51.5145	73.9464	1.39291e-47	0.00771104	-0.485465	-0.732928	-0.407385	-0.654848	-0.513143
1917	Tmsb10	1.11664e-59	9.48218e-05	6.26681	5.25551	49.488	74.4841	65.1924	5.96963	4.40554e-58	0.00265813	2.79655	3.01274	3.37678	3.59297	3.24751
1918	Suclg1	1.22597e-05	0.0544048	25.1554	25.4761	23.6626	21.0522	22.0225	25.2496	1.64583e-05	0.145752	-0.084784	-0.102367	-0.246185	-0.263768	-0.189249
1919	Mrpl19	0.0462944	0.738353	4.1123	3.29722	4.70413	4.09308	4.32022	3.87278	0.0514368	0.827927	0.158035	0.408603	-0.00543435	0.245134	0.126742
1920	Pole4	7.59425e-07	0.829593	0.345794	0.676198	0.997657	1.39868	1.24961	0.442887	1.0781e-06	0.890254	0.569851	0.253116	0.833781	0.517047	0.640715
1921	Hk2	6.82222e-24	0.272504	90.9035	88.3472	31.6908	40.2159	37.0469	90.1523	3.42195e-23	0.430052	-1.49123	-1.45054	-1.15692	-1.11622	-1.2605
1922	Htra2	3.89938e-40	0.0287309	2.58729	2.5258	6.92418	8.52824	7.93197	2.56922	4.97463e-39	0.0938104	1.14337	1.16831	1.40931	1.43426	1.32337
1923	Aup1	5.4765e-22	0.863974	1.39673	2.28414	3.575	4.37597	4.07823	1.6575	2.54475e-21	0.912591	0.932706	0.478253	1.16546	0.711009	0.934255
1924	Mrpl53	3.40732e-09	0.370018	4.67408	4.85367	6.38824	6.13405	6.22854	4.72686	5.27661e-09	0.530769	0.380843	0.335889	0.330333	0.285379	0.33596
1925	Wbp1	0.243899	0.170826	2.02973	2.53846	2.72545	2.46225	2.56009	2.17923	0.255094	0.312197	0.298224	0.0742909	0.192521	-0.0314121	0.163237
1926	Ino80b	2.20699e-12	0.0814774	2.4232	2.16722	4.21014	5.15992	4.80686	2.34798	4.00085e-12	0.190816	0.605976	0.718104	0.847563	0.959692	0.794466
1927	Dctn1	7.41954e-16	2.01884e-05	10.6371	10.0993	11.5104	15.3857	13.9452	10.4791	2.01431e-15	0.000903642	0.104397	0.172669	0.493705	0.561977	0.380675
1928	Mob1a	1.38913e-10	0.123699	0.278183	0.478368	0.98822	1.75806	1.47189	0.337009	2.28007e-10	0.252191	0.637383	0.427472	1.10956	0.899647	0.886604
1929	Bola3	0.0100857	0.645056	40.9484	37.0049	43.3834	40.5166	41.5822	39.7896	0.011713	0.760749	0.0814034	0.223831	-0.0149285	0.1275	0.0620511
1930	Tet3	2.5527e-13	0.0038121	3.44643	3.15164	4.86212	6.94626	6.17153	3.3598	4.96103e-13	0.026257	0.398775	0.497743	0.837627	0.936595	0.718017
1931	Dguok	0.000748969	0.487019	3.6965	3.26124	2.61577	2.5506	2.57483	3.5686	0.000927047	0.635002	-0.377285	-0.23697	-0.403523	-0.263209	-0.353878
1932	Tex261	8.4122e-07	0.391575	12.7226	13.283	14.8266	16.3905	15.8092	12.8873	1.19163e-06	0.551389	0.205791	0.148046	0.341742	0.283997	0.275479
1933	Paip2b	8.82001e-05	0.0332096	3.25433	4.04043	2.66378	2.25169	2.40487	3.48533	0.000113989	0.103233	-0.2156	-0.460216	-0.387744	-0.63236	-0.397615
1934	Zfp638	1.71738e-05	0.514793	0.368537	0.486055	0.846882	1.14776	1.03592	0.403071	2.28966e-05	0.657657	0.432457	0.313604	0.650199	0.531346	0.53709
1935	Dysf	4.31488e-35	0.379072	6.48294	7.7786	11.3551	13.4514	12.6722	6.86369	3.9839e-34	0.539578	0.723429	0.493044	0.949534	0.719148	0.797964
1936	Exoc6b	0.000333695	0.795212	1.11921	1.5988	1.5347	2.11739	1.90079	1.26015	0.0004203	0.866376	0.258283	-0.0360353	0.556811	0.262493	0.360029
1937	Spr	0.000495708	0.00115954	17.8949	14.5148	13.8378	15.7005	15.0081	16.9016	0.000618691	0.0140165	-0.348721	-0.0643675	-0.178112	0.106242	-0.161294
1938	Rab11fip5	3.85533e-26	0.00648392	6.53355	7.11452	9.5527	12.7256	11.5461	6.70427	2.17584e-25	0.0364967	0.486212	0.379034	0.865469	0.758291	0.703514
1939	Cct7	6.04814e-16	0.0149811	11.6796	12.819	13.7819	17.9316	16.389	12.0144	1.66642e-15	0.0614976	0.221328	0.0971778	0.57829	0.45414	0.418069
1940	Tprkb	0.153414	0.246948	1.12088	1.29335	0.752165	1.39059	1.15327	1.17157	0.163037	0.400246	-0.275528	-0.388319	0.1727	0.0599092	-0.0122068
1941	Fam136a	0.0044537	0.613156	0.313452	0.3768	0.572693	0.745128	0.681029	0.332067	0.00528614	0.736375	0.259873	0.191918	0.40997	0.342015	0.335678
1942	Snrpg	1.07905e-18	0.577295	4.19165	3.9606	7.25781	7.41844	7.35873	4.12376	4.19701e-18	0.709301	0.669564	0.735245	0.697359	0.76304	0.706082
1943	Pcyox1	1.64185e-23	0.161018	0.402137	0.895081	1.7964	2.83749	2.45049	0.546994	8.12065e-23	0.300065	0.995941	0.56131	1.45254	1.01791	1.15733
1944	Tia1	6.99667e-20	0.0125947	2.72609	2.34904	4.73052	5.91309	5.4735	2.61529	2.92283e-19	0.055263	0.621004	0.774917	0.891669	1.04558	0.840434
1945	2310040G24Rik	2.42802e-09	1.91464e-06	37.9067	49.5996	38.2322	35.6103	36.5849	41.3428	3.78759e-09	0.000142274	0.0120207	-0.367087	-0.0877705	-0.466878	-0.171962
1946	Pcbp1	2.30033e-34	0.00691054	41.2268	40.928	56.7838	65.5764	62.3079	41.139	2.02306e-33	0.0378615	0.452506	0.462751	0.656851	0.667097	0.58723
1947	Snrnp27	0.525902	0.72574	12.1838	11.7843	13.1136	12.3132	12.6107	12.0664	0.535837	0.819716	0.0983223	0.142709	0.0140945	0.0584809	0.0588837
1948	Anxa4	4.85559e-64	0.206375	6.64055	7.86297	31.8728	36.7347	34.9274	6.99977	2.55428e-62	0.354583	2.10515	1.89103	2.30415	2.09003	2.16705
1949	Aak1	2.26689e-10	0.0303751	0.289176	0.470624	0.652605	1.48604	1.17623	0.342496	3.68181e-10	0.0976818	0.358293	0.168313	0.947401	0.757421	0.696913
1950	Nfu1	0.15865	0.0981675	5.0971	6.03109	5.17689	5.03229	5.08605	5.37156	0.16837	0.215337	0.0187588	-0.186868	-0.0154158	-0.221042	-0.0661417
1951	Gfpt1	0.00552279	0.360028	3.11779	3.84921	4.22229	4.35681	4.3068	3.33273	0.00651783	0.520644	0.342811	0.106931	0.379503	0.143624	0.292568
1952	Isy1	0.040805	0.831132	2.04021	2.81972	2.07178	2.73833	2.49056	2.26927	0.0455217	0.890819	0.0149048	-0.31439	0.298224	-0.0310709	0.0944864
1953	Cnbp	3.07971e-08	1.40118e-07	107.14	136.692	117.395	108.713	111.94	115.824	4.61334e-08	2.02388e-05	0.130701	-0.217839	0.0208294	-0.327711	-0.0487816
1954	Copg1	4.83677e-10	0.75002	6.90143	7.45382	9.89317	10.7807	10.4508	7.06375	7.7363e-10	0.835841	0.463238	0.365749	0.576241	0.478752	0.505923
1955	Rab7	6.8419e-05	0.0361768	35.456	36.3191	35.6251	41.467	39.2954	35.7097	8.88551e-05	0.109065	0.00667537	-0.0270806	0.220184	0.186428	0.134455
1956	Rpn1	7.05884e-17	0.0459128	7.17427	8.56374	9.73526	13.5443	12.1284	7.58258	2.26443e-16	0.129473	0.393195	0.166711	0.831295	0.604811	0.613207
1957	Kbtbd12	6.60901e-30	0.474967	2.24378	2.29942	8.82477	9.72889	9.3928	2.26013	4.52022e-29	0.624737	1.59875	1.57421	1.72575	1.70121	1.67258
1958	Mgll	0.00271079	0.542335	3.9892	3.9831	2.78386	3.12484	2.99809	3.98741	0.00325646	0.681276	-0.39895	-0.397185	-0.274472	-0.272707	-0.318981
1959	Abtb1	1.71147e-20	0.253421	0.334071	0.550362	1.53829	2.12242	1.90528	0.39763	7.39987e-20	0.408484	0.92802	0.71125	1.22683	1.01006	1.0557
1960	Podxl2	2.02456e-26	0.903336	4.2987	4.59791	1.08792	1.31862	1.23286	4.38662	1.15176e-25	0.938535	-1.34357	-1.42282	-1.19237	-1.27162	-1.27049
1961	Tpra1	0.00417652	0.918581	4.63158	5.44427	3.27121	4.16186	3.83078	4.87039	0.00496475	0.948177	-0.398893	-0.593372	-0.125649	-0.320127	-0.281201
1962	Plxna1	2.90678e-53	0.000897007	0.361032	0.436158	5.29157	8.02875	7.01126	0.383109	7.5754e-52	0.0118516	2.20872	2.1312	2.72982	2.65231	2.53411
1963	Slc41a3	4.51145e-06	0.133099	13.2805	16.3196	16.7101	17.5217	17.22	14.1736	6.18112e-06	0.264833	0.310522	0.032168	0.375171	0.0968166	0.263964
1964	Iqsec1	0.0310099	0.100632	1.65344	1.76507	1.43849	2.34208	2.00619	1.68624	0.0349096	0.219219	-0.121877	-0.18133	0.332884	0.273431	0.162347
1965	Nup210	8.44051e-33	0.144794	1.65434	2.53064	4.74819	6.59084	5.90587	1.91185	6.71615e-32	0.280997	1.11475	0.703177	1.5159	1.10433	1.24589
1966	Fbln2	1.40866e-36	0.466128	8.20057	9.29543	16.1523	18.2187	17.4505	8.52231	1.43596e-35	0.617206	0.898606	0.736397	1.06271	0.900505	0.954281
1967	Chchd4	0.106428	0.642058	2.46977	2.93729	1.99203	2.22607	2.13907	2.60715	0.114735	0.758472	-0.213712	-0.396075	-0.105061	-0.287424	-0.200522
1968	Tmem43	7.21625e-26	0.141676	0.307634	0.378569	2.1839	2.87475	2.61794	0.328479	4.00892e-25	0.276474	1.28383	1.20762	1.56714	1.49093	1.44539
1969	Lsm3	7.55993e-06	0.186459	1.66029	1.77559	3.23707	2.67917	2.88655	1.69417	1.02328e-05	0.330492	0.671483	0.610273	0.467795	0.406585	0.52865
1970	Slc6a6	8.34972e-16	0.0980609	7.67941	8.51661	11.9473	15.3888	14.1095	7.92543	2.23973e-15	0.215158	0.576977	0.444126	0.917045	0.784195	0.759463
1971	Ccdc174	7.04316e-05	0.326753	0.279459	0.328642	0.561821	0.812996	0.719627	0.293912	9.13991e-05	0.487254	0.287695	0.233277	0.502841	0.448424	0.410356
1972	Nr2c2	6.06197e-27	0.544216	1.50357	1.60455	4.33185	4.76248	4.6024	1.53324	3.54079e-26	0.68268	1.09065	1.03361	1.2027	1.14566	1.14506
1973	Mrps25	0.00324165	0.0219916	1.31224	2.50845	1.81871	1.91807	1.88114	1.66376	0.00387833	0.0789105	0.285747	-0.3158	0.335727	-0.26582	0.113176
1974	Slc25a26	0.000423705	0.694763	2.63136	2.64038	1.55705	1.75322	1.6803	2.63401	0.000530612	0.797348	-0.506031	-0.509611	-0.39939	-0.40297	-0.43917
1975	Lrig1	0.0376423	0.467734	0.340322	0.431371	0.696323	0.629924	0.654606	0.367078	0.042087	0.618565	0.339831	0.245013	0.282225	0.187408	0.275393
1976	Suclg2	0.0325128	0.0515776	6.48445	5.71574	6.61394	7.24742	7.01194	6.25856	0.0365581	0.140027	0.0247468	0.181097	0.140045	0.296395	0.142468
1977	Tmf1	0.00434962	0.0202345	3.01132	2.2733	1.68439	2.26801	2.05107	2.79445	0.00516763	0.0745518	-0.579481	-0.286152	-0.295663	-0.00233328	-0.314576
1978	Uba3	7.39495e-26	0.499701	5.74881	6.20156	9.62019	10.6116	10.2431	5.88185	4.10018e-25	0.644926	0.654105	0.560428	0.782866	0.689189	0.708168
1979	Arl6ip5	2.3905e-38	0.534635	7.11443	6.45114	15.161	15.2344	15.2071	6.91952	2.69113e-37	0.674487	0.993959	1.11699	1.00049	1.12352	1.03314
1980	Lmod3	5.45312e-07	0.260036	5.69093	5.97413	7.11361	8.34209	7.88543	5.77415	7.77766e-07	0.415531	0.278136	0.218331	0.481539	0.421733	0.391402
1981	Mitf	0.0996621	0.120719	5.81083	5.75025	4.57653	5.69743	5.28076	5.79303	0.1077	0.248315	-0.288463	-0.275574	-0.0242221	-0.0113336	-0.113115
1982	Foxp1	3.79876e-25	0.00254367	0.283764	0.371523	1.78286	3.35712	2.77192	0.309553	2.03989e-24	0.0206473	1.11619	1.02079	1.76299	1.66759	1.52623
1983	Tpt1-ps3	0.000706914	0.812994	3.45809	3.39865	4.32125	4.37241	4.35339	3.44062	0.000876138	0.878754	0.255338	0.274704	0.269144	0.288509	0.269691
1984	Ppp4r2	0.968545	0.937915	5.24799	5.3724	5.11499	5.2902	5.22507	5.28455	0.968773	0.959418	-0.0310415	-0.0594859	0.00971402	-0.0187304	-0.0137188
1985	Pdzrn3	0.0058617	0.000506464	11.0436	9.59986	9.18007	11.3507	10.5438	10.6193	0.00690728	0.00818991	-0.242517	-0.0582981	0.0363243	0.220543	-0.00940941
1986	Itpr1	5.42581e-20	1.58895e-10	7.6908	12.9823	13.3004	11.9204	12.4334	9.24575	2.28114e-19	6.44811e-08	0.718497	0.0324577	0.572086	-0.113953	0.390795
1987	Bhlhe40	1.56402e-57	0.260721	5.73808	6.70195	14.0669	16.2108	15.4138	6.02132	5.33144e-56	0.416392	1.16097	0.968083	1.3529	1.16002	1.2251
1988	Arl8b	0.548303	0.513047	19.3632	19.0423	19.7721	20.4877	20.2217	19.2689	0.557461	0.656188	0.028679	0.0515948	0.0775446	0.10046	0.066269
1989	Lmcd1	1.56634e-05	0.00190189	14.3341	11.9834	14.9897	17.0199	16.2652	13.6433	2.09254e-05	0.0179888	0.0603997	0.30048	0.23285	0.47293	0.237629
1990	Cav3	3.09805e-05	0.871378	1.08708	1.08463	1.96916	2.03136	2.00824	1.08636	4.08567e-05	0.916775	0.508569	0.510266	0.538479	0.540176	0.527931
1991	Thumpd3	0.351358	0.676632	4.95347	4.75393	5.68035	5.19108	5.37295	4.89483	0.362987	0.784632	0.166194	0.215376	0.0564601	0.105642	0.112512
1992	Gt(ROSA)26Sor	3.13945e-07	0.885226	0.201757	0.267232	0.781338	0.816178	0.803227	0.220998	4.5155e-07	0.925858	0.567815	0.491281	0.59576	0.519225	0.56252
1993	Mtmr14	3.95043e-15	0.140503	0.330454	0.621779	1.68762	1.54647	1.59894	0.416063	9.57768e-15	0.275136	1.01441	0.728754	0.936577	0.650918	0.876037
1994	Camk1	2.66078e-18	0.500608	3.00653	3.27441	6.09616	6.88908	6.59433	3.08525	1.00155e-17	0.645284	0.824684	0.731314	0.977503	0.884132	0.894498
1995	Tada3	1.40131e-05	0.404093	0.333022	0.565088	0.692182	1.16137	0.986958	0.401216	1.87678e-05	0.562694	0.344184	0.112641	0.697244	0.465701	0.503882
1996	Arpc4	7.62014e-38	5.21702e-05	10.7745	11.7203	22.9882	37.5724	32.151	11.0524	8.36841e-37	0.00169047	1.02666	0.915193	1.7119	1.60044	1.45973
1997	Jagn1	0.000908132	0.255992	3.71916	4.76127	2.88986	3.23574	3.10717	4.02539	0.00112063	0.411229	-0.278809	-0.566667	-0.155914	-0.443773	-0.291092
1998	Creld1	0.000291491	0.498147	0.252867	0.584356	0.65979	0.831392	0.767603	0.350278	0.000368231	0.643506	0.405768	0.0671045	0.547708	0.209044	0.388538
[truncated: 6,523 more rows]
