# Supplementary material for: Compartment-specific remodeling of skeletal muscle in Duchenne muscular dystrophy
Source: Research Square preprint supplement (doi:10.21203/rs.3.rs-8852148/v1), 2026-02-23
Supplement: Supplementary file 4 [file c3b51f429457d1dafdf6027d.xlsx]

## Sheet: Sections metadata
	Section	Sample	Condition	Replicates	batch	Region	Uncorrected PC1	Uncorrected PC2	Uncorrected UMAP1	Uncorrected UMAP2	PC1	PC2	UMAP1	UMAP2	Clusters
0	001	WT	Controls	WT-1	batch1	Proximal	-23.332	-10.2155	12.195	13.8013	-15.6524	3.47899	5.1763	-1.16127	WT
1	002	WT	Controls	WT-1	batch1	Central	-5.96067	-13.3356	4.94628	-7.54008	-11.2257	2.05488	5.32712	-2.59999	WT
2	003	WT	Controls	WT-1	batch1	Central	-6.36831	-14.3718	5.11197	-7.3013	-11.8135	2.25034	5.36621	-2.92165	WT
3	004	WT	Controls	WT-1	batch1	Central	-11.0245	-12.8624	5.72218	-6.62109	-12.6195	2.88035	5.18815	-1.73498	WT
4	005	WT	Controls	WT-1	batch1	Central	-12.4747	-12.3286	5.96676	-6.78479	-13.2796	2.8962	4.7602	-1.76602	WT
5	006	WT	Controls	WT-1	batch1	Central	-9.56147	-12.2145	5.94042	-6.99606	-11.8369	1.80944	4.81972	-2.47457	WT
6	007	WT	Controls	WT-1	batch1	Central	-6.07921	-13.7475	5.27384	-7.63682	-11.3075	1.94877	5.71578	-2.60013	WT
7	008	WT	Controls	WT-1	batch1	Central	-7.00135	-12.9054	5.52024	-7.32864	-11.1543	1.57675	5.36086	-2.96992	WT
8	009	WT	Controls	WT-1	batch1	Central	-6.23113	-13.6334	5.17949	-7.3377	-11.4495	2.12203	4.86823	-2.74385	WT
9	010	WT	Controls	WT-1	batch1	Central	-3.77326	-13.2673	4.76761	-8.2465	-10.0636	1.45893	6.39763	-2.52364	WT
10	011	WT	Controls	WT-1	batch1	Central	-7.17356	-13.1197	5.62915	-7.2311	-11.5854	1.68473	4.92532	-2.4174	WT
11	012	WT	Controls	WT-1	batch1	Central	-7.19292	-14.2857	5.63456	-7.51701	-11.9854	2.46468	4.22577	-1.85662	WT
12	013	WT	Controls	WT-1	batch1	Central	-5.68759	-13.7936	5.11805	-8.07	-11.373	2.18017	5.63703	-2.69818	WT
13	014	WT	Controls	WT-1	batch1	Central	-7.34406	-14.3548	5.33189	-7.05728	-12.085	2.41536	5.73242	-2.23482	WT
14	015	WT	Controls	WT-1	batch1	Central	-7.93492	-13.9034	5.5567	-6.98593	-12.4486	2.4923	4.99391	-1.8764	WT
15	016	WT	Controls	WT-1	batch1	Central	-7.50923	-14.0643	5.79813	-7.37756	-12.211	2.59294	5.44282	-2.35816	WT
16	017	WT	Controls	WT-1	batch1	Central	-6.83467	-12.9079	5.45679	-7.17652	-11.0973	1.74183	6.14994	-2.2718	WT
17	018	WT	Controls	WT-1	batch1	Central	-5.84899	-14.3509	5.16521	-7.4855	-11.6425	2.06298	6.43155	-1.90963	WT
18	019	WT	Controls	WT-1	batch1	Central	-5.37068	-13.5683	5.01943	-7.67019	-10.8278	1.77871	7.67982	-1.68509	WT
19	020	WT	Controls	WT-1	batch1	Central	-3.87949	-15.4057	5.40391	-8.44756	-11.3186	2.38379	6.87045	-1.47798	WT
20	021	WT	Controls	WT-1	batch1	Central	-4.51248	-14.5089	5.22995	-7.86454	-11.0086	1.91895	7.12803	-1.5133	WT
21	022	WT	Controls	WT-1	batch1	Central	-5.70324	-14.9179	5.53518	-7.88871	-11.7657	2.40577	7.12185	-1.26644	WT
22	023	WT	Controls	WT-1	batch1	Central	-4.15624	-14.5698	4.77924	-8.39564	-11.1555	2.2091	7.99827	-1.28606	WT
23	024	WT	Controls	WT-1	batch1	Central	-3.08149	-14.6079	4.9155	-8.83379	-10.5905	1.83434	8.63996	-0.981981	WT
24	025	WT	Controls	WT-1	batch1	Central	-1.29399	-15.4402	5.37595	-8.91713	-10.3284	1.44856	8.29624	-1.24029	WT
25	026	WT	Controls	WT-1	batch1	Central	-2.30518	-14.9058	4.97932	-8.77143	-10.1784	1.49816	8.54258	-0.663713	WT
26	027	WT	Controls	WT-1	batch1	Central	-3.60211	-14.3442	5.45004	-8.39252	-10.2977	1.59786	8.18375	-1.53658	WT
27	028	WT	Controls	WT-1	batch1	Distal	-6.57147	-13.5459	5.60917	-7.80575	-11.1838	1.91941	8.9784	-1.09125	WT
28	029	WT	Controls	WT-1	batch1	Distal	-3.57071	-14.9573	4.67208	-8.7661	-10.5578	2.06599	8.91823	-1.00861	WT
29	030	WT	Controls	WT-1	batch1	Distal	-4.78214	-14.8654	5.40545	-8.06443	-11.5278	2.38023	7.74316	-0.944032	WT
30	031	WT	Controls	WT-1	batch1	Distal	-1.1527	-14.5567	5.28809	-8.90848	-9.85373	1.42861	8.61684	-0.78468	WT
31	032	WT	Controls	WT-1	batch1	Distal	-3.12225	-14.7529	5.18333	-8.54463	-10.7406	1.88096	8.77371	-0.500562	WT
32	033	WT	Controls	WT-1	batch1	Distal	-4.55787	-13.5119	4.73583	-7.85869	-10.0703	1.12811	8.91212	-0.34058	WT
33	034	WT	Controls	WT-1	batch1	Distal	-2.98513	-14.5217	5.16533	-8.71262	-10.5326	1.62915	9.21557	-0.624725	WT
34	035	WT	Controls	WT-1	batch1	Distal	-2.10248	-15.0005	5.1638	-9.11914	-10.44	1.55513	9.62227	-0.517648	WT
35	036	WT	Controls	WT-1	batch1	Distal	-3.33019	-14.9227	5.29301	-8.75673	-10.9252	2.01033	9.66062	-0.440328	WT
36	037	WT	Controls	WT-1	batch1	Distal	-5.36469	-14.8039	5.06044	-8.1932	-11.5977	1.93417	10.0414	-0.422626	WT
37	038	WT	Controls	WT-1	batch1	Distal	-4.82489	-14.0477	4.86779	-8.13527	-10.8374	1.48283	10.1113	-0.521132	WT
38	039	WT	Controls	WT-1	batch1	Distal	-4.76746	-13.9789	4.39213	-8.08375	-10.9008	1.86444	9.89286	-0.255973	WT
39	040	WT	Controls	WT-1	batch1	Distal	-5.92105	-13.7446	5.61437	-7.92481	-10.8235	1.83755	10.1805	-0.825548	WT
40	041	WT	Controls	WT-1	batch1	Distal	-11.4897	-12.1813	6.22369	-6.75858	-12.4463	2.66506	10.6807	-1.6838	WT
41	042	WT	Controls	WT-1	batch1	Distal	-10.9353	-10.8785	5.92289	-6.65583	-11.4127	2.07608	10.4488	-1.37234	WT
42	043	WT	Controls	WT-1	batch1	Distal	-9.70229	-11.5047	6.14952	-6.81074	-11.4613	1.77631	10.862	-1.10591	WT
43	044	WT	Controls	WT-1	batch1	Distal	-12.2584	-9.99336	6.04302	-6.46756	-12.3165	2.02119	10.138	-1.68379	WT
44	045	WT	Controls	WT-1	batch1	Distal	-8.73792	-12.2833	6.07528	-7.01922	-11.4882	1.46246	10.1885	-1.40258	WT
45	046	WT	Controls	WT-1	batch1	Distal	-11.7685	-10.948	6.13603	-6.47548	-12.0927	1.97233	10.0399	-1.53078	WT
46	047	WT	Controls	WT-1	batch1	Distal	-12.927	-7.01075	5.58693	-6.40237	-9.44798	-0.664208	9.51135	-1.08408	WT
47	001	WT	Controls	WT-2	batch1	Proximal	-35.6014	-2.11295	15.0164	13.7149	-12.3082	2.27861	7.19053	-1.70167	WT
48	002	WT	Controls	WT-2	batch1	Proximal	-34.1436	-2.61058	14.7915	14.2739	-11.9082	2.31113	7.18179	-1.64003	WT
49	003	WT	Controls	WT-2	batch1	Proximal	-35.0689	-2.19087	15.0656	14.0617	-12.5412	2.05449	5.73392	-1.24449	WT
50	004	WT	Controls	WT-2	batch1	Proximal	-33.6836	-2.03861	14.573	14.3333	-11.5775	2.28679	6.74837	-2.14632	WT
51	005	WT	Controls	WT-2	batch1	Proximal	-34.457	-2.07776	14.7662	13.9873	-12.1504	2.29288	6.56115	-2.0361	WT
52	006	WT	Controls	WT-2	batch1	Central	-33.091	-3.49624	14.0733	14.0973	-11.5936	2.32442	5.00932	-2.32155	WT
53	007	WT	Controls	WT-2	batch1	Central	-35.6676	-2.67629	14.6656	13.4904	-12.8112	2.88228	4.55194	-1.42799	WT
54	008	WT	Controls	WT-2	batch1	Central	-33.273	-2.43363	14.1261	14.0166	-12.3321	2.15694	4.31395	-2.17918	WT
55	009	WT	Controls	WT-2	batch1	Central	-33.3439	-4.20554	14.186	13.9784	-12.5082	2.89624	4.86197	-1.70999	WT
56	010	WT	Controls	WT-2	batch1	Central	-32.8569	-2.65584	13.9405	13.7071	-12.2173	2.70667	5.69647	-2.1398	WT
57	011	WT	Controls	WT-2	batch1	Central	-34.4043	-2.5405	14.8925	13.8987	-12.5831	2.27234	4.41172	-1.70728	WT
58	012	WT	Controls	WT-2	batch1	Central	-43.1935	0.297689	14.3338	13.3822	-14.8248	3.27914	4.99886	-1.43709	WT
59	013	WT	Controls	WT-2	batch1	Central	-32.0809	-2.27992	13.4062	14.0813	-11.8175	2.19643	5.22951	-2.64201	WT
60	014	WT	Controls	WT-2	batch1	Central	-32.2292	-2.69835	13.664	14.6221	-11.3395	1.81812	4.6135	-2.79457	WT
61	015	WT	Controls	WT-2	batch1	Central	-34.4305	-0.0433216	15.1399	14.0716	-10.6499	0.675985	4.70121	-2.64791	WT
62	016	WT	Controls	WT-2	batch1	Central	-31.0096	-1.98351	13.0986	13.7263	-10.271	1.8511	5.81397	-2.76831	WT
63	017	WT	Controls	WT-2	batch1	Central	-34.07	-1.79852	14.9014	13.8274	-11.9877	2.17205	4.18101	-1.54661	WT
64	018	WT	Controls	WT-2	batch1	Central	-32.1412	-2.88861	13.4593	13.9033	-11.2962	2.00384	4.83677	-2.24289	WT
65	019	WT	Controls	WT-2	batch1	Central	-32.5605	-2.87062	13.9102	14.1486	-11.4565	1.98195	4.44882	-2.206	WT
66	020	WT	Controls	WT-2	batch1	Central	-30.9724	-3.97402	12.9373	14.5816	-11.7354	2.21775	4.66177	-2.05978	WT
67	021	WT	Controls	WT-2	batch1	Central	-31.3588	-3.50179	13.1859	14.4385	-11.7621	2.44971	5.04285	-1.95901	WT
68	022	WT	Controls	WT-2	batch1	Central	-31.7398	-3.37002	13.5068	14.6679	-11.6429	1.98377	4.31216	-1.76135	WT
69	023	WT	Controls	WT-2	batch1	Central	-33.5225	-2.91261	14.5901	14.4715	-12.1617	2.13689	4.55265	-1.3572	WT
70	024	WT	Controls	WT-2	batch1	Central	-32.3832	-2.80336	13.962	14.703	-11.9459	2.05683	4.90764	-1.79171	WT
71	025	WT	Controls	WT-2	batch1	Central	-31.9034	-3.45636	13.569	14.7508	-12.0181	2.3196	5.83074	-1.36071	WT
72	026	WT	Controls	WT-2	batch1	Central	-31.1348	-3.47199	12.8753	14.6339	-11.8165	2.28436	6.00517	-1.80009	WT
73	027	WT	Controls	WT-2	batch1	Central	-31.6986	-2.84634	13.0794	13.9839	-11.2723	1.7728	7.45204	-1.4089	WT
74	028	WT	Controls	WT-2	batch1	Central	-32.7662	-3.01826	13.8285	13.9847	-11.9877	2.33525	6.13663	-1.56587	WT
75	029	WT	Controls	WT-2	batch1	Central	-32.9619	-2.50824	14.3828	14.2606	-11.8937	2.68265	6.40905	-1.7528	WT
76	030	WT	Controls	WT-2	batch1	Central	-31.8743	-3.50921	13.451	14.2463	-11.9333	2.17581	5.98913	-1.29103	WT
77	031	WT	Controls	WT-2	batch1	Central	-30.2514	-3.63817	12.616	13.9572	-11.3242	2.04055	6.92636	-1.71182	WT
78	032	WT	Controls	WT-2	batch1	Central	-32.5291	-2.88166	14.1462	14.6949	-11.7026	2.02317	6.5005	-1.26882	WT
79	033	WT	Controls	WT-2	batch1	Central	-32.2434	-2.88503	13.8081	14.8019	-11.858	2.17781	6.31828	-1.08536	WT
80	034	WT	Controls	WT-2	batch1	Central	-32.7409	-3.37704	14.2213	14.6572	-11.7464	2.09763	5.71467	-1.26789	WT
81	035	WT	Controls	WT-2	batch1	Central	-30.9081	-3.86003	12.5494	14.1178	-11.5163	1.99608	7.30269	-0.872103	WT
82	036	WT	Controls	WT-2	batch1	Central	-30.2878	-3.3861	12.6083	14.3246	-11.2033	2.05084	7.32628	-1.03266	WT
83	037	WT	Controls	WT-2	batch1	Central	-30.5208	-2.87051	12.8697	14.5386	-10.9195	1.75821	7.59048	-1.15039	WT
84	038	WT	Controls	WT-2	batch1	Central	-30.0556	-3.17254	12.3286	13.9812	-10.7294	1.59559	7.96198	-1.4789	WT
85	039	WT	Controls	WT-2	batch1	Central	-31.3451	-2.79734	13.2783	14.7689	-11.0367	1.67238	8.36499	-1.22998	WT
86	040	WT	Controls	WT-2	batch1	Central	-31.8457	-2.68426	13.445	13.7594	-11.6392	1.90693	6.96669	-0.935598	WT
87	041	WT	Controls	WT-2	batch1	Central	-33.8209	-3.22803	14.5584	13.9415	-12.4458	2.4455	8.89156	-1.42009	WT
88	042	WT	Controls	WT-2	batch1	Central	-31.4725	-2.8688	13.1642	13.7875	-11.1926	1.82892	8.15197	-0.828824	WT
89	043	WT	Controls	WT-2	batch1	Distal	-33.0186	-3.23639	13.8513	13.5126	-11.5639	2.03871	8.25759	-1.02074	WT
90	044	WT	Controls	WT-2	batch1	Distal	-31.3276	-2.26595	12.9849	13.0444	-11.3729	1.85247	9.47648	-0.5797	WT
91	045	WT	Controls	WT-2	batch1	Distal	-30.2162	-3.27264	12.5959	13.5885	-10.9792	1.72656	8.93721	-0.684177	WT
92	046	WT	Controls	WT-2	batch1	Distal	-29.0891	-2.53488	12.4211	13.6791	-10.9447	1.81803	9.34679	-0.32972	WT
93	047	WT	Controls	WT-2	batch1	Distal	-29.9194	-3.42325	12.3306	13.6317	-10.7939	1.77805	9.20683	-0.469451	WT
94	048	WT	Controls	WT-2	batch1	Distal	-31.5759	-3.11922	12.8876	13.0612	-11.5569	2.57487	9.39837	-1.29478	WT
95	049	WT	Controls	WT-2	batch1	Distal	-30.2299	-2.55692	12.5849	13.2515	-10.8167	1.77812	9.27209	-0.713458	WT
96	050	WT	Controls	WT-2	batch1	Distal	-31.6494	-1.73756	13.2645	13.4541	-11.284	1.68449	10.6265	-1.01585	WT
97	051	WT	Controls	WT-2	batch1	Distal	-31.4583	-1.65764	13.0801	13.1297	-10.9549	1.48338	9.82391	-0.345979	WT
98	052	WT	Controls	WT-2	batch1	Distal	-29.7765	-2.26075	12.29	13.5103	-10.0385	1.3129	9.59261	-0.538468	WT
99	053	WT	Controls	WT-2	batch1	Distal	-31.209	-2.41652	13.1521	13.2604	-11.0118	1.58126	9.87568	-0.988536	WT
100	054	WT	Controls	WT-2	batch1	Distal	-30.8969	-2.53605	12.7866	12.9575	-11.262	1.85102	10.4411	-0.446536	WT
101	055	WT	Controls	WT-2	batch1	Distal	-31.7963	-2.56286	13.1167	13.4488	-11.5727	2.15982	9.99166	-1.50608	WT
102	056	WT	Controls	WT-2	batch1	Distal	-33.7033	-1.29521	14.0996	13.2548	-11.9655	2.15918	10.266	-1.63181	WT
103	057	WT	Controls	WT-2	batch1	Distal	-30.8495	-2.70832	12.8193	13.1313	-10.7298	1.49562	9.78975	-1.2	WT
104	058	WT	Controls	WT-2	batch1	Distal	-33.3888	-1.82664	14.7094	13.7938	-11.3124	1.62174	10.6357	-0.865476	WT
105	059	WT	Controls	WT-2	batch1	Distal	-32.7793	-0.221501	14.4892	13.5531	-9.84168	0.184113	9.94541	-0.811507	WT
106	060	WT	Controls	WT-2	batch1	Distal	-32.5581	-2.25314	13.4849	12.9896	-11.0354	1.99885	10.8051	-0.828139	WT
107	061	WT	Controls	WT-2	batch1	Distal	-34.3397	0.165282	13.9715	13.0212	-10.8602	1.37978	10.7255	-0.632059	WT
108	062	WT	Controls	WT-2	batch1	Distal	-35.7915	-1.29199	14.5307	13.1668	-11.6239	1.83382	10.5927	-0.723203	WT
109	063	WT	Controls	WT-2	batch1	Distal	-37.5356	-1.19349	14.3379	13.3029	-13.2097	2.28787	10.7691	-1.3563	WT
110	064	WT	Controls	WT-2	batch1	Distal	-38.621	-0.513614	14.3009	13.4329	-12.4307	1.60459	11.0321	-1.39724	WT
111	001	Ctr	Controls	Ctr-1	batch2	Proximal	-21.2094	-20.1557	-2.89285	8.91659	-12.6038	4.58002	20.6948	-8.09988	Ctr
112	002	Ctr	Controls	Ctr-1	batch2	Proximal	-20.1145	-20.8687	-2.71771	9.21575	-12.7471	4.71158	20.6647	-7.87195	Ctr
113	003	Ctr	Controls	Ctr-1	batch2	Proximal	-16.1576	-23.7032	-3.50846	8.61074	-12.5142	4.82288	21.7388	-7.75445	Ctr
114	004	Ctr	Controls	Ctr-1	batch2	Central	-16.1836	-24.3662	-3.46351	8.64579	-13.225	5.64309	22.4776	-7.41936	Ctr
115	005	Ctr	Controls	Ctr-1	batch2	Central	-15.0772	-24.4885	-3.93607	8.60332	-12.1055	4.76613	21.6977	-7.50725	Ctr
116	006	Ctr	Controls	Ctr-1	batch2	Central	-16.02	-23.856	-3.46333	9.05281	-12.6545	4.84021	22.1008	-7.03047	Ctr
117	007	Ctr	Controls	Ctr-1	batch2	Central	-14.0543	-23.7825	-2.78861	10.1975	-12.2219	4.74148	20.7659	-6.14779	Ctr
118	008	Ctr	Controls	Ctr-1	batch2	Central	-15.4338	-24.6424	-3.79369	9.12481	-12.44	4.78978	22.36	-6.89459	Ctr
119	009	Ctr	Controls	Ctr-1	batch2	Central	-16.9783	-24.1467	-3.25174	8.6526	-13.203	5.22319	22.7229	-6.62231	Ctr
120	010	Ctr	Controls	Ctr-1	batch2	Central	-13.7218	-24.7852	-3.80372	10.1321	-11.8759	4.6142	22.2337	-6.7841	Ctr
121	011	Ctr	Controls	Ctr-1	batch2	Central	-13.7896	-25.1523	-3.31245	10.2187	-11.9427	4.46888	20.9185	-6.50158	Ctr
122	012	Ctr	Controls	Ctr-1	batch2	Central	-13.2563	-24.7995	-3.36974	10.1759	-11.8182	4.5209	21.7306	-6.68628	Ctr
123	013	Ctr	Controls	Ctr-1	batch2	Central	-13.0122	-25.3796	-3.64051	10.4505	-11.481	4.21306	21.6547	-6.42535	Ctr
124	014	Ctr	Controls	Ctr-1	batch2	Central	-11.6594	-25.5953	-2.86079	11.1968	-11.4602	4.46092	20.4214	-6.68391	Ctr
125	015	Ctr	Controls	Ctr-1	batch2	Central	-13.406	-24.9314	-3.17686	10.3139	-11.7758	4.75581	21.0944	-6.94256	Ctr
126	016	Ctr	Controls	Ctr-1	batch2	Central	-13.54	-24.9119	-3.66903	10.12	-11.7535	4.42933	22.0099	-6.6633	Ctr
127	017	Ctr	Controls	Ctr-1	batch2	Central	-15.2473	-24.7213	-3.72937	8.9092	-12.546	4.91619	22.6885	-6.94593	Ctr
128	018	Ctr	Controls	Ctr-1	batch2	Central	-14.5031	-24.7061	-3.65551	9.50696	-12.1102	4.6575	21.6188	-6.90171	Ctr
129	019	Ctr	Controls	Ctr-1	batch2	Central	-11.6701	-25.883	-2.58914	11.4455	-11.831	4.94447	20.4967	-6.65086	Ctr
130	020	Ctr	Controls	Ctr-1	batch2	Central	-16.8272	-21.9836	-2.88511	9.17081	-12.1703	4.7951	20.5954	-6.08417	Ctr
131	021	Ctr	Controls	Ctr-1	batch2	Central	-13.9837	-25.7147	-3.66092	10.0409	-12.4658	4.88163	22.3054	-6.42768	Ctr
132	022	Ctr	Controls	Ctr-1	batch2	Central	-12.1441	-26.405	-3.34686	10.9844	-12.0435	5.10243	21.4077	-6.90742	Ctr
133	023	Ctr	Controls	Ctr-1	batch2	Central	-15.6625	-23.5784	-3.87666	8.85424	-12.769	4.99277	22.439	-6.30294	Ctr
134	024	Ctr	Controls	Ctr-1	batch2	Central	-13.9611	-25.3599	-3.4905	9.94384	-12.1588	4.81668	21.8672	-7.0776	Ctr
135	025	Ctr	Controls	Ctr-1	batch2	Central	-10.6344	-25.7858	-2.7764	11.6672	-11.0078	4.6007	20.1577	-6.75989	Ctr
136	026	Ctr	Controls	Ctr-1	batch2	Central	-14.2029	-25.3578	-4.02962	9.80894	-12.1959	4.61238	22.4665	-6.7925	Ctr
137	027	Ctr	Controls	Ctr-1	batch2	Central	-14.9136	-24.4516	-3.81598	9.3085	-11.9502	4.36697	21.2591	-6.4762	Ctr
138	028	Ctr	Controls	Ctr-1	batch2	Central	-14.4736	-24.2757	-4.02247	9.20576	-12.0164	4.63004	22.7157	-6.74631	Ctr
139	029	Ctr	Controls	Ctr-1	batch2	Central	-16.0341	-24.6652	-3.46572	8.50016	-12.9539	5.00219	22.5433	-7.56186	Ctr
140	030	Ctr	Controls	Ctr-1	batch2	Central	-14.9012	-23.3864	-3.69607	9.21319	-11.6677	4.5008	21.68	-7.45634	Ctr
141	031	Ctr	Controls	Ctr-1	batch2	Central	-18.1943	-20.2943	-2.90906	9.44201	-11.4059	4.52856	19.5533	-6.9054	Ctr
142	032	Ctr	Controls	Ctr-1	batch2	Central	-16.9392	-23.0501	-3.03139	8.71738	-12.4792	5.20188	22.539	-7.26375	Ctr
143	033	Ctr	Controls	Ctr-1	batch2	Central	-11.08	-26.3942	-3.02395	11.5345	-11.691	4.84223	20.8993	-7.34666	Ctr
144	034	Ctr	Controls	Ctr-1	batch2	Central	-12.9592	-25.4028	-3.0005	10.6421	-11.4213	4.45777	20.2199	-7.20163	Ctr
145	035	Ctr	Controls	Ctr-1	batch2	Central	-12.7791	-26.2927	-2.7384	11.0262	-11.6058	4.91458	19.8543	-7.29546	Ctr
146	036	Ctr	Controls	Ctr-1	batch2	Central	-15.3072	-25.111	-3.59162	9.17455	-11.7133	4.32013	21.5702	-7.93921	Ctr
147	037	Ctr	Controls	Ctr-1	batch2	Central	-14.0483	-23.5805	-3.14997	9.6795	-11.0738	4.48859	20.3543	-7.5914	Ctr
148	038	Ctr	Controls	Ctr-1	batch2	Central	-13.1693	-24.2917	-2.92167	10.652	-11.5858	4.54849	19.9493	-7.74118	Ctr
149	039	Ctr	Controls	Ctr-1	batch2	Central	-10.4243	-25.9794	-3.14811	11.3253	-11.3228	5.04058	19.4413	-7.19095	Ctr
150	040	Ctr	Controls	Ctr-1	batch2	Central	-12.1567	-25.9619	-3.06207	10.8745	-11.5287	4.57008	19.9698	-7.90122	Ctr
151	041	Ctr	Controls	Ctr-1	batch2	Central	-12.6381	-25.7965	-3.45378	10.8258	-11.6835	4.56848	20.0998	-8.33495	Ctr
152	042	Ctr	Controls	Ctr-1	batch2	Distal	-13.8047	-26.4079	-3.95994	10.2298	-12.6249	5.21836	21.1602	-8.29371	Ctr
153	043	Ctr	Controls	Ctr-1	batch2	Distal	-10.0308	-26.8631	-2.75334	11.6098	-10.9401	4.40131	19.303	-7.22529	Ctr
154	044	Ctr	Controls	Ctr-1	batch2	Distal	-16.1793	-24.7942	-3.62139	8.73921	-12.492	5.08875	20.8962	-8.55259	Ctr
155	045	Ctr	Controls	Ctr-1	batch2	Distal	-12.8081	-24.7176	-2.62647	10.8801	-10.8395	4.51704	19.0628	-7.6822	Ctr
156	046	Ctr	Controls	Ctr-1	batch2	Distal	-14.0106	-23.753	-2.60288	10.0621	-10.6547	3.97131	19.1023	-7.27223	Ctr
157	047	Ctr	Controls	Ctr-1	batch2	Distal	-13.3663	-22.9932	-2.60897	10.6261	-10.2654	3.92081	18.5644	-7.55632	Ctr
158	048	Ctr	Controls	Ctr-1	batch2	Distal	-12.7856	-25.6475	-3.86357	10.7844	-11.3276	4.41758	19.6176	-8.83926	Ctr
159	049	Ctr	Controls	Ctr-1	batch2	Distal	-15.4573	-20.9942	-2.44603	10.0722	-11.0157	4.45778	18.5727	-7.67054	Ctr
160	050	Ctr	Controls	Ctr-1	batch2	Distal	-15.469	-22.8033	-3.2767	9.2056	-11.7741	4.38501	19.0531	-8.8029	Ctr
161	051	Ctr	Controls	Ctr-1	batch2	Distal	-19.6629	-20.175	-3.01679	9.00234	-12.4385	5.42688	21.9887	-7.82086	Ctr
162	052	Ctr	Controls	Ctr-1	batch2	Distal	-14.9058	-23.3749	-2.89253	9.81496	-11.7981	5.10306	19.1834	-8.22988	Ctr
163	053	Ctr	Controls	Ctr-1	batch2	Distal	-14.5089	-24.4789	-2.65821	10.0318	-11.6699	4.8706	18.7402	-8.24761	Ctr
164	054	Ctr	Controls	Ctr-1	batch2	Distal	-12.9728	-24.8503	-3.66914	10.463	-10.8049	3.75248	18.4479	-8.78939	Ctr
165	055	Ctr	Controls	Ctr-1	batch2	Distal	-9.34864	-26.6962	-3.04419	11.5207	-10.2994	4.36346	18.8241	-8.60428	Ctr
166	056	Ctr	Controls	Ctr-1	batch2	Distal	-9.84729	-26.6098	-3.22928	11.5954	-10.5475	4.18829	18.3972	-8.56823	Ctr
167	057	Ctr	Controls	Ctr-1	batch2	Distal	-9.55023	-27.1298	-2.93415	11.6213	-10.6882	4.4537	18.3681	-8.39326	Ctr
168	058	Ctr	Controls	Ctr-1	batch2	Distal	-12.1107	-23.9086	-3.23967	10.8019	-10.4441	4.20679	18.1636	-8.62866	Ctr
169	059	Ctr	Controls	Ctr-1	batch2	Distal	-12.5901	-22.7863	-3.86443	10.1995	-10.0264	3.44908	18.23	-9.13125	Ctr
170	060	Ctr	Controls	Ctr-1	batch2	Distal	-12.0427	-24.946	-4.05456	10.5606	-10.6738	3.98568	18.8486	-9.43284	Ctr
171	061	Ctr	Controls	Ctr-1	batch2	Distal	-13.4206	-19.1226	-2.45003	10.1635	-8.39872	2.47469	18.1328	-8.13411	Ctr
172	001	Ctr	Controls	Ctr-2	batch2	Proximal	-33.9255	0.766259	25.2948	5.20676	-13.2963	4.43636	21.1579	-7.71347	Ctr
173	002	Ctr	Controls	Ctr-2	batch2	Proximal	-38.3903	2.33292	25.2451	5.17621	-13.7388	3.2776	21.1935	-7.09418	Ctr
174	003	Ctr	Controls	Ctr-2	batch2	Central	-33.9275	1.2971	25.4934	5.33612	-13.0873	4.65037	21.2866	-7.60941	Ctr
175	004	Ctr	Controls	Ctr-2	batch2	Central	-28.5534	0.189196	26.1476	5.01224	-12.0244	4.22246	21.3066	-5.74506	Ctr
176	005	Ctr	Controls	Ctr-2	batch2	Central	-29.6305	1.28709	25.9592	4.92374	-12.421	4.6994	20.1114	-6.25738	Ctr
177	006	Ctr	Controls	Ctr-2	batch2	Central	-32.8848	0.502041	25.8371	5.47469	-12.6562	4.44502	19.9043	-6.54454	Ctr
178	007	Ctr	Controls	Ctr-2	batch2	Central	-28.6715	0.210215	26.3009	5.19473	-11.8025	4.23149	21.9368	-5.58432	Ctr
179	008	Ctr	Controls	Ctr-2	batch2	Central	-28.0166	1.0123	26.2973	5.12981	-11.317	3.503	21.5403	-5.51558	Ctr
180	009	Ctr	Controls	Ctr-2	batch2	Central	-28.2306	-0.73374	26.3046	4.97891	-12.3279	4.58457	22.1744	-5.96773	Ctr
181	010	Ctr	Controls	Ctr-2	batch2	Central	-29.3088	1.10037	26.1198	5.27669	-12.325	4.59503	21.3847	-5.27269	Ctr
182	011	Ctr	Controls	Ctr-2	batch2	Central	-28.1232	-0.502549	25.7242	4.74095	-12.4042	4.71847	21.5627	-5.15819	Ctr
183	012	Ctr	Controls	Ctr-2	batch2	Central	-27.0954	-0.492795	25.0621	3.98787	-11.2914	3.99789	20.5734	-5.86707	Ctr
184	013	Ctr	Controls	Ctr-2	batch2	Central	-28.5824	-0.0524219	26.1413	5.49265	-12.1725	4.45951	22.2979	-5.94768	Ctr
185	014	Ctr	Controls	Ctr-2	batch2	Central	-27.4192	0.618297	25.0421	4.36268	-12.0094	4.47082	20.4616	-5.65246	Ctr
186	015	Ctr	Controls	Ctr-2	batch2	Central	-27.8451	0.105583	26.0282	4.55381	-12.1748	4.40151	21.7096	-5.3838	Ctr
187	016	Ctr	Controls	Ctr-2	batch2	Central	-27.5774	1.02866	25.4912	4.55149	-11.673	3.81605	21.3089	-5.15177	Ctr
188	017	Ctr	Controls	Ctr-2	batch2	Central	-26.8654	1.15659	25.5812	4.05288	-11.3207	4.13106	21.1762	-5.38307	Ctr
189	018	Ctr	Controls	Ctr-2	batch2	Central	-27.1754	-0.201436	25.6784	4.12847	-11.7993	4.32881	21.0347	-5.36519	Ctr
190	019	Ctr	Controls	Ctr-2	batch2	Central	-29.7629	0.436152	25.8202	5.61438	-12.4686	4.32913	22.5434	-6.18499	Ctr
191	020	Ctr	Controls	Ctr-2	batch2	Central	-27.6192	0.0989699	25.6061	4.35592	-11.5286	3.80861	21.0841	-5.89807	Ctr
192	021	Ctr	Controls	Ctr-2	batch2	Central	-30.9027	-0.10146	25.8984	5.53524	-13.1561	4.57619	21.9203	-5.50177	Ctr
193	022	Ctr	Controls	Ctr-2	batch2	Central	-27.3449	-0.301642	25.3306	4.36787	-12.0347	4.32214	20.7876	-5.35445	Ctr
194	023	Ctr	Controls	Ctr-2	batch2	Central	-25.2588	-0.855631	24.4564	3.12351	-11.8459	4.56739	20.9488	-5.61716	Ctr
195	024	Ctr	Controls	Ctr-2	batch2	Central	-24.2469	-0.321	24.7948	2.5083	-10.7484	4.30826	20.1821	-6.14574	Ctr
196	025	Ctr	Controls	Ctr-2	batch2	Central	-26.1466	-0.533668	24.4461	3.66231	-11.3853	4.3641	20.9377	-5.53365	Ctr
197	026	Ctr	Controls	Ctr-2	batch2	Central	-25.49	-0.841636	24.4948	3.05348	-10.9804	4.17435	20.3737	-6.64415	Ctr
198	027	Ctr	Controls	Ctr-2	batch2	Central	-26.2719	-0.549438	25.4557	3.94104	-11.1766	4.06864	21.4889	-7.15689	Ctr
199	028	Ctr	Controls	Ctr-2	batch2	Central	-26.3711	-0.457221	24.9559	3.64686	-11.7128	4.2251	20.8763	-7.08388	Ctr
200	029	Ctr	Controls	Ctr-2	batch2	Central	-27.6452	-0.0879386	25.8607	4.46609	-11.7098	4.42885	21.6681	-7.9017	Ctr
201	030	Ctr	Controls	Ctr-2	batch2	Central	-25.2228	-1.00522	24.4205	3.4317	-11.0616	4.30678	19.9197	-7.5997	Ctr
202	031	Ctr	Controls	Ctr-2	batch2	Central	-26.0282	-1.46649	24.6486	3.35456	-11.3278	4.62545	20.4823	-7.99943	Ctr
203	032	Ctr	Controls	Ctr-2	batch2	Central	-27.6965	-1.07666	25.862	4.78613	-12.3078	4.90671	22.2403	-7.63868	Ctr
204	033	Ctr	Controls	Ctr-2	batch2	Central	-26.2298	-0.279848	25.0342	3.58261	-11.5305	4.27349	20.6129	-8.12845	Ctr
205	034	Ctr	Controls	Ctr-2	batch2	Central	-24.4594	-1.05474	24.6545	2.52348	-11.1898	4.42437	20.2121	-7.83686	Ctr
206	035	Ctr	Controls	Ctr-2	batch2	Central	-26.6969	-0.959622	25.1546	3.83663	-11.7046	4.6317	20.3699	-8.20473	Ctr
207	036	Ctr	Controls	Ctr-2	batch2	Central	-28.1218	0.238692	26.2492	4.39904	-11.6876	4.11861	19.9375	-8.37818	Ctr
208	037	Ctr	Controls	Ctr-2	batch2	Central	-26.806	1.30559	25.4337	4.58	-10.5306	3.65603	20.4566	-8.36746	Ctr
209	038	Ctr	Controls	Ctr-2	batch2	Central	-25.1485	-1.64527	24.7421	2.91106	-11.2558	4.46677	19.2369	-8.02749	Ctr
210	039	Ctr	Controls	Ctr-2	batch2	Central	-23.2814	-1.74708	24.9478	2.71002	-10.7198	4.1747	18.9897	-7.64178	Ctr
211	040	Ctr	Controls	Ctr-2	batch2	Central	-22.9102	-1.15294	24.9303	2.80956	-10.1879	3.96473	19.1794	-7.93633	Ctr
212	041	Ctr	Controls	Ctr-2	batch2	Central	-24.2866	-0.957872	24.5146	2.44958	-10.948	4.16661	19.5253	-7.84415	Ctr
213	042	Ctr	Controls	Ctr-2	batch2	Central	-24.9565	-1.57072	24.4924	2.70841	-11.2292	4.78174	19.5721	-8.25286	Ctr
214	043	Ctr	Controls	Ctr-2	batch2	Central	-26.375	-1.51293	24.9861	3.26905	-11.3908	4.86684	18.9707	-8.828	Ctr
215	044	Ctr	Controls	Ctr-2	batch2	Central	-25.798	-0.91558	24.6393	2.67804	-11.2295	4.50918	18.4316	-8.04104	Ctr
216	045	Ctr	Controls	Ctr-2	batch2	Distal	-27.0594	-0.330567	25.937	4.04318	-11.8898	4.43256	19.1522	-9.0276	Ctr
217	046	Ctr	Controls	Ctr-2	batch2	Distal	-25.079	-0.852785	24.2925	3.25303	-10.9241	3.90741	18.5998	-9.01532	Ctr
218	047	Ctr	Controls	Ctr-2	batch2	Distal	-25.5032	-1.5383	24.8042	3.67052	-11.3796	4.46222	18.9848	-9.27407	Ctr
219	048	Ctr	Controls	Ctr-2	batch2	Distal	-32.846	0.252061	25.6389	5.56995	-14.2765	5.22406	19.8267	-8.99287	Ctr
220	049	Ctr	Controls	Ctr-2	batch2	Distal	-25.543	-0.774602	24.6419	3.46134	-10.8353	4.15332	18.7295	-9.1262	Ctr
221	050	Ctr	Controls	Ctr-2	batch2	Distal	-27.0759	-0.922228	26.0573	4.45187	-11.327	3.87443	19.274	-9.26763	Ctr
222	051	Ctr	Controls	Ctr-2	batch2	Distal	-27.8408	-0.399412	25.7975	4.61321	-11.6524	4.30726	18.6161	-9.16815	Ctr
223	052	Ctr	Controls	Ctr-2	batch2	Distal	-25.6054	-0.448649	24.5844	3.83099	-10.4736	3.72458	18.3432	-9.36741	Ctr
224	053	Ctr	Controls	Ctr-2	batch2	Distal	-25.3042	-0.258858	24.3526	3.28333	-10.3793	3.59111	17.9515	-8.85209	Ctr
225	054	Ctr	Controls	Ctr-2	batch2	Distal	-24.4707	-0.109664	24.1317	2.89531	-10.1134	3.28043	18.0344	-8.83676	Ctr
226	055	Ctr	Controls	Ctr-2	batch2	Distal	-24.3789	-1.06636	24.2828	2.99559	-10.4907	3.90813	18.2382	-9.27342	Ctr
227	056	Ctr	Controls	Ctr-2	batch2	Distal	-32.4146	1.28463	25.4362	5.37237	-11.7318	3.96988	18.2524	-9.49389	Ctr
228	001	DMD	DMD	DMD-1	batch1	Central	18.0185	-1.66901	5.99244	-9.74249	1.37377	-0.756724	-6.08909	9.42505	DMD
229	002	DMD	DMD	DMD-1	batch1	Central	22.9518	-3.57478	6.14568	-10.3058	4.58995	-1.54154	-7.01286	10.8983	DMD
230	003	DMD	DMD	DMD-1	batch1	Central	26.8101	-4.97059	6.3093	-10.7608	3.39533	-2.47472	-7.22728	10.3655	DMD
231	004	DMD	DMD	DMD-1	batch1	Central	41.9489	-8.47877	6.4669	-11.4711	6.70591	-5.11786	-6.69372	12.6343	DMD
232	005	DMD	DMD	DMD-1	batch1	Central	42.4314	-9.02961	6.37769	-11.683	6.24304	-4.61937	-6.79607	12.4318	DMD
233	006	DMD	DMD	DMD-1	batch1	Central	49.9704	-8.74199	6.67778	-12.1509	9.74591	-6.24341	-6.4705	13.5332	DMD
234	007	DMD	DMD	DMD-1	batch1	Central	48.13	-9.57255	6.56163	-11.8652	7.11848	-7.44023	-6.55819	13.093	DMD
235	008	DMD	DMD	DMD-1	batch1	Central	44.8989	-9.53758	6.24416	-11.8817	6.24934	-6.5064	-6.74492	12.9943	DMD
236	009	DMD	DMD	DMD-1	batch1	Central	44.3479	-10.4346	6.36043	-11.7306	5.00978	-7.72088	-6.52302	12.6261	DMD
237	010	DMD	DMD	DMD-1	batch1	Central	47.9818	-12.1106	6.53527	-11.9976	5.25647	-7.00236	-6.50494	12.4311	DMD
238	011	DMD	DMD	DMD-1	batch1	Central	45.9264	-9.92299	6.69772	-11.5905	7.34188	-4.65674	-6.64872	12.7713	DMD
239	012	DMD	DMD	DMD-1	batch1	Central	42.6957	-6.51399	6.71266	-11.364	7.72372	-7.54582	-6.70591	13.2434	DMD
240	013	DMD	DMD	DMD-1	batch1	Central	51.4152	-7.90355	6.75852	-12.3647	12.8715	-5.92908	-6.28713	14.3397	DMD
241	014	DMD	DMD	DMD-1	batch1	Central	50.1191	-6.40365	6.6124	-12.2951	12.7786	-6.92556	-6.06542	14.1898	DMD
242	015	DMD	DMD	DMD-1	batch1	Central	49.6164	-9.14315	6.91379	-11.9102	10.2824	-6.44498	-6.44841	13.7095	DMD
243	016	DMD	DMD	DMD-1	batch1	Central	56.4708	-9.95739	7.16753	-12.9667	12.8644	-5.95001	-5.98205	14.207	DMD
244	017	DMD	DMD	DMD-1	batch1	Central	50.2804	-8.89703	6.49753	-12.3051	11.074	-6.09969	-6.36282	13.8274	DMD
245	018	DMD	DMD	DMD-1	batch1	Central	56.6242	-9.7255	6.77198	-12.8536	13.7409	-5.17067	-6.35866	14.65	DMD
246	019	DMD	DMD	DMD-1	batch1	Central	59.8322	-9.45034	6.70841	-13.5702	17.0016	-4.20895	-5.87829	15.4955	DMD
247	020	DMD	DMD	DMD-1	batch1	Central	59.7142	-6.17165	6.49735	-13.3691	20.9691	-3.31851	-3.62631	16.2177	DMD
248	021	DMD	DMD	DMD-1	batch1	Central	56.6345	-8.2646	6.96982	-13.043	15.5074	-6.22642	-6.19535	14.9648	DMD
249	022	DMD	DMD	DMD-1	batch1	Central	66.3766	-8.02609	6.92428	-14.8186	22.8315	-2.75779	-3.70617	17.3529	DMD
250	023	DMD	DMD	DMD-1	batch1	Central	66.0036	-8.80096	6.79983	-14.6959	20.438	-2.89102	-4.87594	16.4591	DMD
251	024	DMD	DMD	DMD-1	batch1	Central	61.6941	-9.40189	6.68952	-13.8198	17.0481	-4.47418	-6.09363	15.5687	DMD
252	025	DMD	DMD	DMD-1	batch1	Central	62.8619	-8.11532	6.67207	-14.2058	19.8306	-3.29016	-4.93946	16.205	DMD
253	026	DMD	DMD	DMD-1	batch1	Central	55.3369	-8.42342	7.08436	-12.7803	13.4347	-6.3375	-6.20096	14.42	DMD
254	027	DMD	DMD	DMD-1	batch1	Central	57.2201	-8.59965	6.86854	-12.9436	13.9646	-6.3206	-6.0837	14.7153	DMD
255	028	DMD	DMD	DMD-1	batch1	Central	58.9218	-7.84405	7.2652	-13.1926	16.1743	-5.50562	-6.00172	15.1456	DMD
256	029	DMD	DMD	DMD-1	batch1	Central	64.4736	-9.00076	6.46921	-14.4342	19.3566	-3.65551	-5.4662	16.1423	DMD
257	030	DMD	DMD	DMD-1	batch1	Central	65.1898	-8.66073	6.76001	-14.7275	20.4427	-3.57385	-4.87836	16.8603	DMD
258	031	DMD	DMD	DMD-1	batch1	Central	63.2814	-7.34933	7.06583	-14.1592	20.6468	-3.63959	-4.63078	17.0055	DMD
259	032	DMD	DMD	DMD-1	batch1	Central	62.4025	-7.42643	6.85177	-14.0241	20.1125	-4.01923	-4.39804	16.3394	DMD
260	033	DMD	DMD	DMD-1	batch1	Central	62.6813	-7.61048	6.94008	-13.9667	20.2188	-3.42484	-4.81964	16.5888	DMD
261	034	DMD	DMD	DMD-1	batch1	Central	67.3476	-8.83093	7.07673	-14.8668	21.104	-3.15143	-4.90075	17.5223	DMD
262	035	DMD	DMD	DMD-1	batch1	Central	56.2006	-5.98278	6.81927	-13.0231	18.0095	-3.84368	-4.52814	15.6022	DMD
263	036	DMD	DMD	DMD-1	batch1	Central	62.3435	-8.7924	6.41987	-14.1519	17.6929	-4.31817	-6.1318	16.033	DMD
264	037	DMD	DMD	DMD-1	batch1	Central	58.3634	-7.03524	7.05922	-13.3269	17.3304	-5.09564	-5.83657	15.5069	DMD
265	038	DMD	DMD	DMD-1	batch1	Central	59.9312	-8.60016	7.04307	-13.6221	16.6251	-5.01136	-6.00287	15.2498	DMD
266	039	DMD	DMD	DMD-1	batch1	Central	61.4538	-7.27106	6.407	-13.8854	19.6067	-3.09819	-4.49077	15.6526	DMD
267	040	DMD	DMD	DMD-1	batch1	Central	62.9878	-9.31097	6.30648	-14.3964	18.0375	-3.8289	-5.98465	16.3099	DMD
268	041	DMD	DMD	DMD-1	batch1	Central	61.823	-8.45685	6.79299	-13.8863	17.9224	-4.08003	-5.94895	15.867	DMD
269	042	DMD	DMD	DMD-1	batch1	Central	64.447	-8.47003	6.54245	-14.7037	19.5826	-3.41798	-5.42669	16.4276	DMD
270	043	DMD	DMD	DMD-1	batch1	Central	64.5968	-7.076	7.20186	-14.3123	20.8976	-3.99635	-4.14993	16.8926	DMD
271	044	DMD	DMD	DMD-1	batch1	Central	66.1705	-6.3698	7.13667	-14.7952	22.8589	-2.76798	-3.65424	17.3468	DMD
272	045	DMD	DMD	DMD-1	batch1	Central	63.4885	-6.61933	6.54118	-14.1685	21.5966	-3.91217	-3.50982	16.6454	DMD
273	046	DMD	DMD	DMD-1	batch1	Distal	69.3845	-7.53034	7.34101	-15.185	23.6003	-2.59839	-4.01113	18.1008	DMD
274	047	DMD	DMD	DMD-1	batch1	Distal	61.4332	-5.17947	6.5317	-13.7358	19.9552	-4.97304	-4.90129	16.7952	DMD
275	048	DMD	DMD	DMD-1	batch1	Distal	68.3315	-8.25599	7.29341	-15.2253	22.5027	-3.25901	-5.01564	18.5174	DMD
276	049	DMD	DMD	DMD-1	batch1	Distal	69.0766	-7.52139	7.23185	-15.0915	23.4409	-2.75208	-4.54063	18.6756	DMD
277	050	DMD	DMD	DMD-1	batch1	Distal	68.0056	-8.73974	7.12383	-15.3539	23.7474	-0.918715	-4.28139	18.8798	DMD
278	051	DMD	DMD	DMD-1	batch1	Distal	69.072	-8.58694	7.19518	-15.3267	24.1702	-1.33218	-4.55075	18.8584	DMD
279	052	DMD	DMD	DMD-1	batch1	Distal	72.5824	-6.92611	7.59917	-15.0747	25.7057	-2.74937	-4.70612	18.9547	DMD
280	053	DMD	DMD	DMD-1	batch1	Distal	66.0337	-6.19836	6.84836	-14.8597	22.3544	-3.879	-4.87756	18.352	DMD
281	054	DMD	DMD	DMD-1	batch1	Distal	66.3826	-7.08371	6.81362	-15.1537	22.2038	-3.52718	-5.32985	18.8035	DMD
282	055	DMD	DMD	DMD-1	batch1	Distal	73.21	-8.30637	7.64723	-14.8483	26.7838	-1.00374	-4.67631	19.3008	DMD
283	056	DMD	DMD	DMD-1	batch1	Distal	75.6874	-7.20382	7.91359	-15.3453	29.734	0.883478	-4.42995	19.2174	DMD
284	057	DMD	DMD	DMD-1	batch1	Distal	72.8609	-7.06184	7.76671	-15.268	28.5028	0.509486	-4.24625	18.8863	DMD
285	058	DMD	DMD	DMD-1	batch1	Distal	81.8304	-7.52656	8.2209	-15.4432	35.7026	4.1689	-5.1712	20.0753	DMD
286	059	DMD	DMD	DMD-1	batch1	Distal	88.5098	-6.2799	8.52982	-15.5818	40.7685	5.21872	-5.3306	20.5223	DMD
287	060	DMD	DMD	DMD-1	batch1	Distal	90.9774	-6.05244	8.88004	-15.7671	42.5316	5.90693	-5.43324	20.6814	DMD
288	061	DMD	DMD	DMD-1	batch1	Distal	93.5518	-5.92479	8.79928	-15.9285	43.8623	6.82096	-5.94918	20.7891	DMD
289	062	DMD	DMD	DMD-1	batch1	Distal	92.3241	-6.77603	8.75521	-15.8211	42.8534	6.17166	-5.42357	20.9124	DMD
290	063	DMD	DMD	DMD-1	batch1	Distal	96.8071	-6.63344	8.40853	-15.8332	46.1581	7.7209	-5.54944	20.7492	DMD
291	064	DMD	DMD	DMD-1	batch1	Distal	95.5073	-6.27302	8.73943	-15.7346	46.039	7.86815	-5.80874	20.5977	DMD
292	065	DMD	DMD	DMD-1	batch1	Distal	91.3673	-6.24522	8.86987	-15.6304	42.9601	7.24423	-5.71135	20.4598	DMD
293	066	DMD	DMD	DMD-1	batch1	Distal	98.1371	-5.3602	8.43956	-15.4453	49.0811	10.0443	-5.50064	20.5862	DMD
294	067	DMD	DMD	DMD-1	batch1	Distal	91.5438	-3.38427	8.5938	-16.0609	45.9388	7.68528	-5.69182	20.7993	DMD
295	001	DMD	DMD	DMD-2	batch2	Proximal	-6.26819	41.1686	-2.88978	-2.5076	19.9376	-3.48968	-5.61535	17.1951	DMD
296	002	DMD	DMD	DMD-2	batch2	Proximal	-10.3866	39.1524	-2.53633	-2.52833	19.1665	-3.14387	-5.74844	17.0811	DMD
297	003	DMD	DMD	DMD-2	batch2	Proximal	-4.69228	41.0676	-2.76905	-2.8468	19.3767	-2.26474	-5.91765	17.0299	DMD
298	004	DMD	DMD	DMD-2	batch2	Proximal	3.12626	45.0031	-0.842972	-2.42685	22.4602	-3.7174	-4.50555	18.4744	DMD
299	005	DMD	DMD	DMD-2	batch2	Proximal	5.3356	45.6508	-0.272893	-2.09373	23.1455	-4.6351	-3.99958	18.3046	DMD
300	006	DMD	DMD	DMD-2	batch2	Proximal	2.66268	44.8647	-0.97331	-2.7098	22.2147	-4.31975	-4.12263	18.3494	DMD
301	007	DMD	DMD	DMD-2	batch2	Proximal	1.26191	42.8792	-1.31897	-3.21054	20.6833	-3.36446	-5.16624	17.1341	DMD
302	008	DMD	DMD	DMD-2	batch2	Proximal	2.7479	44.6353	-1.13437	-2.62433	22.7065	-4.28599	-3.80727	18.2105	DMD
303	009	DMD	DMD	DMD-2	batch2	Proximal	2.37905	42.8272	-0.899678	-3.19009	20.6057	-3.09853	-4.74699	16.7444	DMD
304	010	DMD	DMD	DMD-2	batch2	Proximal	-1.98765	40.7805	-2.654	-3.30193	18.2367	-2.18856	-4.99863	15.7782	DMD
305	011	DMD	DMD	DMD-2	batch2	Proximal	2.58421	43.2273	-0.93067	-2.95415	20.3857	-3.04304	-5.02768	16.8513	DMD
306	012	DMD	DMD	DMD-2	batch2	Proximal	1.14794	42.0716	-1.25804	-3.50804	19.4272	-2.47442	-5.32289	16.2505	DMD
307	013	DMD	DMD	DMD-2	batch2	Proximal	2.62008	43.4318	-0.744951	-3.03814	20.3514	-3.29185	-5.25723	16.8366	DMD
308	014	DMD	DMD	DMD-2	batch2	Proximal	2.7767	43.2735	-0.591912	-2.98503	20.739	-3.08745	-5.1024	17.5714	DMD
309	015	DMD	DMD	DMD-2	batch2	Proximal	4.66195	44.9526	0.140146	-2.34654	21.8365	-3.76161	-4.43129	18.1107	DMD
310	016	DMD	DMD	DMD-2	batch2	Proximal	2.08731	43.8309	-1.11924	-3.11992	20.864	-3.30305	-4.77019	17.2293	DMD
311	017	DMD	DMD	DMD-2	batch2	Proximal	0.604075	44.3315	-2.28823	-3.17284	22.4115	-5.0895	-3.62017	17.3216	DMD
312	018	DMD	DMD	DMD-2	batch2	Proximal	0.382584	43.3186	-2.08073	-3.40473	20.6271	-3.35663	-3.8796	16.52	DMD
313	019	DMD	DMD	DMD-2	batch2	Proximal	2.15307	44.026	-1.32633	-2.7114	21.2421	-3.58501	-4.07584	16.9977	DMD
314	020	DMD	DMD	DMD-2	batch2	Proximal	0.43756	43.573	-1.66048	-3.32764	20.596	-3.80332	-4.14486	16.2959	DMD
315	021	DMD	DMD	DMD-2	batch2	Proximal	3.08112	43.6009	-0.592304	-2.79577	20.8807	-3.47729	-4.44369	16.6181	DMD
316	022	DMD	DMD	DMD-2	batch2	Central	-0.247134	42.6907	-2.61733	-3.74691	19.8441	-3.03877	-4.0872	15.7595	DMD
317	023	DMD	DMD	DMD-2	batch2	Central	0.800238	44.6708	-2.39935	-3.55767	22.3089	-4.42252	-3.09793	16.9149	DMD
318	024	DMD	DMD	DMD-2	batch2	Central	0.310786	43.7609	-2.43124	-3.50515	21.0112	-3.76354	-3.52664	16.546	DMD
319	025	DMD	DMD	DMD-2	batch2	Central	-0.97346	43.1373	-2.1241	-3.34872	19.5536	-3.20667	-4.51974	16.1024	DMD
320	026	DMD	DMD	DMD-2	batch2	Central	-1.08125	42.7795	-3.08644	-3.42144	20.8023	-3.504	-3.77013	15.9824	DMD
321	027	DMD	DMD	DMD-2	batch2	Central	-2.06677	42.6266	-3.00188	-3.68198	19.59	-2.88736	-4.67922	15.8519	DMD
322	028	DMD	DMD	DMD-2	batch2	Central	1.68881	43.3719	-1.57437	-2.89725	20.6814	-3.40741	-5.00459	17.0884	DMD
323	029	DMD	DMD	DMD-2	batch2	Central	-0.578016	43.8389	-2.85276	-3.68625	21.5311	-4.1349	-3.79672	16.7578	DMD
324	030	DMD	DMD	DMD-2	batch2	Central	-4.39762	40.9924	-2.75607	-2.90613	18.9483	-2.66587	-4.3829	15.5789	DMD
325	031	DMD	DMD	DMD-2	batch2	Central	-5.16142	40.912	-2.97308	-2.79416	19.3996	-3.00769	-4.0044	15.6237	DMD
326	032	DMD	DMD	DMD-2	batch2	Central	2.16349	44.6794	-1.70771	-2.62736	22.5764	-4.38294	-3.36345	17.8467	DMD
327	033	DMD	DMD	DMD-2	batch2	Central	-0.18638	43.0289	-2.40972	-3.44316	20.3065	-3.44867	-3.85748	15.8951	DMD
328	034	DMD	DMD	DMD-2	batch2	Central	0.99735	44.6271	-2.24113	-3.63724	21.8589	-4.295	-3.14193	16.9721	DMD
329	035	DMD	DMD	DMD-2	batch2	Central	-0.429007	44.4812	-2.70747	-3.34236	21.3692	-3.98832	-3.32261	16.7363	DMD
330	036	DMD	DMD	DMD-2	batch2	Central	-1.76786	43.2437	-3.08521	-3.44478	21.3471	-4.03058	-3.60651	15.8831	DMD
331	037	DMD	DMD	DMD-2	batch2	Central	3.17934	45.5912	-1.57846	-2.19811	22.2548	-4.05069	-3.21742	17.4493	DMD
332	038	DMD	DMD	DMD-2	batch2	Central	4.87529	46.7498	-1.06692	-2.23722	23.7496	-4.88065	-3.21916	17.5975	DMD
333	039	DMD	DMD	DMD-2	batch2	Central	4.06827	45.6307	-1.08804	-2.23646	22.2701	-4.30874	-3.7065	17.9069	DMD
334	040	DMD	DMD	DMD-2	batch2	Central	3.4357	45.1178	-1.42062	-2.25442	22.2904	-4.05366	-3.48163	17.7651	DMD
335	041	DMD	DMD	DMD-2	batch2	Central	2.85412	44.4296	-1.48605	-2.40627	22.1697	-4.00972	-3.60873	17.6139	DMD
336	042	DMD	DMD	DMD-2	batch2	Central	2.61736	45.119	-1.88684	-2.55152	22.0456	-4.34637	-3.36608	16.9807	DMD
337	043	DMD	DMD	DMD-2	batch2	Central	-2.01431	43.0136	-3.0154	-3.14855	20.8732	-3.62116	-4.38678	16.8566	DMD
338	044	DMD	DMD	DMD-2	batch2	Central	3.65352	45.4157	-0.677597	-2.37069	22.4583	-4.33868	-3.73745	17.9878	DMD
339	045	DMD	DMD	DMD-2	batch2	Central	-4.9424	41.0239	-2.373	-2.8171	18.5118	-2.62543	-5.91428	16.8239	DMD
340	046	DMD	DMD	DMD-2	batch2	Central	0.875637	43.9016	-1.64533	-3.17566	21.6034	-4.48737	-4.55083	18.0162	DMD
341	047	DMD	DMD	DMD-2	batch2	Distal	5.48584	45.6707	-0.12756	-2.07466	22.5903	-4.60058	-4.15748	18.4288	DMD
342	048	DMD	DMD	DMD-2	batch2	Distal	0.236771	44.0646	-1.5622	-3.39455	21.8365	-4.49297	-4.5976	18.3559	DMD
343	049	DMD	DMD	DMD-2	batch2	Distal	4.33492	45.1197	-0.276252	-2.53785	21.8563	-3.74087	-4.58129	17.9734	DMD
344	050	DMD	DMD	DMD-2	batch2	Distal	0.671939	43.7251	-0.861551	-3.28576	21.8851	-4.386	-5.01988	18.6251	DMD
345	051	DMD	DMD	DMD-2	batch2	Distal	4.45301	44.2255	-0.0413092	-2.5841	21.2021	-3.58074	-5.10724	17.8261	DMD
346	052	DMD	DMD	DMD-2	batch2	Distal	5.23092	44.7746	-0.0275764	-2.17777	21.7985	-3.88846	-5.18844	18.4237	DMD
347	053	DMD	DMD	DMD-2	batch2	Distal	3.83667	44.0432	-0.131386	-2.54727	20.9481	-3.78194	-5.30368	17.7707	DMD
348	054	DMD	DMD	DMD-2	batch2	Distal	4.34779	44.5222	0.114066	-2.31383	21.0582	-3.98783	-5.67249	18.301	DMD
349	055	DMD	DMD	DMD-2	batch2	Distal	1.41265	43.0997	-1.06701	-3.45022	19.4463	-3.16715	-5.74229	16.6511	DMD
350	056	DMD	DMD	DMD-2	batch2	Distal	3.99178	43.6899	0.359381	-2.81608	20.6127	-3.33157	-5.57633	18.4829	DMD
351	057	DMD	DMD	DMD-2	batch2	Distal	2.67981	42.5187	-0.224355	-3.10464	20.3794	-3.24128	-5.92922	18.1362	DMD
352	058	DMD	DMD	DMD-2	batch2	Distal	2.88751	44.8921	-0.235162	-2.60022	22.0031	-4.58216	-5.57629	18.716	DMD
353	059	DMD	DMD	DMD-2	batch2	Distal	4.29717	44.3739	0.298528	-2.52173	21.0337	-3.96108	-5.72702	18.2481	DMD
354	060	DMD	DMD	DMD-2	batch2	Distal	0.647788	42.994	-0.826449	-3.60054	20.8346	-4.16416	-5.83547	18.5386	DMD
355	061	DMD	DMD	DMD-2	batch2	Distal	-7.58664	39.6491	-2.76502	-2.67409	18.2195	-2.5692	-6.20829	17.0831	DMD
356	062	DMD	DMD	DMD-2	batch2	Distal	-0.0248337	41.9688	-1.13501	-3.7008	19.3755	-2.79337	-5.98835	17.7344	DMD
357	063	DMD	DMD	DMD-2	batch2	Distal	-11.8123	37.244	-2.53384	-2.45386	16.3283	-1.50007	-6.21386	16.8156	DMD
358	064	DMD	DMD	DMD-2	batch2	Distal	-8.29643	39.4533	-2.74876	-2.30214	17.6617	-3.12476	-6.2444	17.3488	DMD
359	065	DMD	DMD	DMD-2	batch2	Distal	2.69417	43.3674	-0.0277111	-3.10348	20.6643	-3.36899	-6.0095	18.5933	DMD
360	066	DMD	DMD	DMD-2	batch2	Distal	5.05475	44.9326	0.386298	-2.3051	22.0855	-4.22664	-5.84277	18.5549	DMD
361	001	DMD	DMD	DMD-3	batch2	Proximal	-2.91904	-0.99741	18.8561	-1.71827	-2.29211	-0.779979	-5.59553	9.03114	DMD
362	002	DMD	DMD	DMD-3	batch2	Proximal	0.353503	-3.07578	19.167	-1.46656	-3.06004	-0.227018	-5.93334	9.28482	DMD
363	003	DMD	DMD	DMD-3	batch2	Proximal	4.44956	-1.52074	18.9668	-1.29915	-0.673475	-2.0464	-5.41947	9.44864	DMD
364	004	DMD	DMD	DMD-3	batch2	Proximal	2.92473	-1.53805	19.1054	-1.22894	-0.548309	-1.79503	-5.91959	9.05931	DMD
365	005	DMD	DMD	DMD-3	batch2	Proximal	3.66128	-2.06909	18.9664	-1.203	-0.277681	-2.32424	-6.22627	8.78067	DMD
366	006	DMD	DMD	DMD-3	batch2	Central	11.864	-2.13309	19.7448	-2.79291	2.42444	-2.5296	-6.04962	10.435	DMD
367	007	DMD	DMD	DMD-3	batch2	Central	10.6941	-2.86864	19.7693	-2.39401	1.2931	-1.72272	-6.30541	9.67159	DMD
368	008	DMD	DMD	DMD-3	batch2	Central	7.11743	-2.35174	19.4138	-1.00886	0.314677	-1.002	-6.26876	9.47443	DMD
369	009	DMD	DMD	DMD-3	batch2	Central	8.07173	-2.44482	19.6582	-1.42047	0.711779	-1.38213	-5.90048	9.32634	DMD
370	010	DMD	DMD	DMD-3	batch2	Central	7.56824	-1.33043	19.4631	-0.853127	0.787731	-2.06652	-5.98845	9.3716	DMD
371	011	DMD	DMD	DMD-3	batch2	Central	9.17072	-1.8387	19.849	-1.6445	1.44201	-1.915	-6.60328	9.60075	DMD
372	012	DMD	DMD	DMD-3	batch2	Central	8.51035	-2.36166	19.6766	-1.78345	1.69399	-1.90563	-6.59646	9.73478	DMD
373	013	DMD	DMD	DMD-3	batch2	Central	8.39444	-1.52302	20.0066	-1.25383	1.56753	-2.18666	-6.88644	9.84615	DMD
374	014	DMD	DMD	DMD-3	batch2	Central	8.03001	-1.50807	19.6498	-0.931303	0.957546	-2.49164	-6.4699	9.32207	DMD
375	015	DMD	DMD	DMD-3	batch2	Central	8.10566	-0.80646	19.6784	-0.781394	2.83509	-2.7356	-7.18532	10.1696	DMD
376	016	DMD	DMD	DMD-3	batch2	Central	-0.457311	-2.14894	18.9395	-1.69981	-2.19061	-0.729735	-5.62798	8.67359	DMD
377	017	DMD	DMD	DMD-3	batch2	Central	12.467	-1.88	20.0725	-2.97536	3.02483	-2.78052	-6.99177	10.8027	DMD
378	018	DMD	DMD	DMD-3	batch2	Central	11.4313	-1.17635	20.0721	-2.06577	3.18622	-2.77059	-7.18795	10.697	DMD
379	019	DMD	DMD	DMD-3	batch2	Central	7.83511	-1.36145	19.7725	-1.10951	1.93796	-2.0771	-7.1376	9.57938	DMD
380	020	DMD	DMD	DMD-3	batch2	Central	15.0955	-1.19558	20.435	-3.52251	4.61605	-3.36053	-7.34457	11.4806	DMD
381	021	DMD	DMD	DMD-3	batch2	Central	12.0387	-0.802221	19.9297	-2.51443	3.78356	-2.40636	-6.76256	11.0001	DMD
382	022	DMD	DMD	DMD-3	batch2	Central	13.8363	0.385281	20.494	-3.16048	5.3392	-3.85695	-6.97542	11.8115	DMD
383	023	DMD	DMD	DMD-3	batch2	Central	13.9894	-0.138704	20.2755	-3.53237	4.73772	-3.70207	-6.94411	11.7725	DMD
384	024	DMD	DMD	DMD-3	batch2	Central	13.8614	-0.393195	20.0394	-3.3075	4.3476	-3.49064	-7.36724	11.4501	DMD
385	025	DMD	DMD	DMD-3	batch2	Central	15.8272	-1.97212	20.6733	-3.29131	4.20779	-3.05161	-6.68164	11.3694	DMD
386	026	DMD	DMD	DMD-3	batch2	Central	13.2646	-1.39643	20.215	-3.12017	4.0851	-3.21613	-7.22018	11.2548	DMD
387	027	DMD	DMD	DMD-3	batch2	Central	13.2077	-1.52823	19.8957	-3.26858	3.22123	-2.38146	-6.34731	10.9711	DMD
388	028	DMD	DMD	DMD-3	batch2	Central	11.1671	-1.07972	20.1739	-2.37632	3.11373	-2.38981	-7.22185	10.6168	DMD
389	029	DMD	DMD	DMD-3	batch2	Central	12.4359	-0.689781	20.3362	-2.79815	3.45988	-2.67764	-6.40744	10.8821	DMD
390	030	DMD	DMD	DMD-3	batch2	Central	11.7869	-0.149826	20.3906	-2.37291	4.40952	-3.36021	-6.6327	11.2046	DMD
391	031	DMD	DMD	DMD-3	batch2	Central	14.2776	-0.821409	20.4457	-2.95417	4.4458	-3.3176	-6.98363	11.4397	DMD
392	032	DMD	DMD	DMD-3	batch2	Central	15.611	0.929564	20.3081	-3.78604	5.87486	-4.2672	-6.75125	11.679	DMD
393	033	DMD	DMD	DMD-3	batch2	Central	8.56864	0.0656917	19.9956	-1.15202	2.55487	-2.34371	-6.99427	10.1424	DMD
394	034	DMD	DMD	DMD-3	batch2	Central	9.68897	-0.280746	20.0479	-1.69585	3.64588	-3.2436	-6.75545	11.1181	DMD
395	035	DMD	DMD	DMD-3	batch2	Central	13.453	-1.31201	20.0616	-3.47513	4.03075	-2.95808	-7.07384	11.4711	DMD
396	036	DMD	DMD	DMD-3	batch2	Central	11.7887	-1.86699	19.9245	-2.87619	2.65947	-2.52547	-6.65111	10.2925	DMD
397	037	DMD	DMD	DMD-3	batch2	Central	12.1319	-1.49708	19.7643	-3.06117	3.29104	-2.69734	-6.63696	10.89	DMD
398	038	DMD	DMD	DMD-3	batch2	Central	7.91028	-1.93427	19.4545	-1.54132	1.51622	-1.12528	-5.83213	9.65318	DMD
399	039	DMD	DMD	DMD-3	batch2	Central	6.47102	-1.00986	19.2751	-0.744526	1.77752	-1.50922	-6.25178	9.65582	DMD
400	040	DMD	DMD	DMD-3	batch2	Central	15.206	-1.82542	20.4406	-3.56575	3.78115	-2.51605	-6.28453	11.1377	DMD
401	041	DMD	DMD	DMD-3	batch2	Central	16.9796	-1.09794	20.8443	-3.40579	5.25787	-3.48634	-6.18227	11.5436	DMD
402	042	DMD	DMD	DMD-3	batch2	Central	15.7934	-2.43825	20.7753	-3.52543	3.75094	-2.79385	-6.04748	11.181	DMD
403	043	DMD	DMD	DMD-3	batch2	Central	9.38341	-2.0612	19.6858	-1.89404	0.572537	-1.96224	-5.86391	8.94652	DMD
404	044	DMD	DMD	DMD-3	batch2	Central	8.2054	-2.22635	19.8757	-1.53709	-0.270694	-1.5063	-5.43537	9.54582	DMD
405	045	DMD	DMD	DMD-3	batch2	Central	11.3065	-2.03416	19.685	-2.72379	2.28362	-1.9206	-5.98816	10.2974	DMD
406	046	DMD	DMD	DMD-3	batch2	Central	11.2679	-2.51269	20.0496	-2.7943	2.19917	-1.81123	-6.0945	10.173	DMD
407	047	DMD	DMD	DMD-3	batch2	Central	8.62932	-1.58726	19.9351	-1.29492	0.738496	-2.02868	-5.88111	9.65462	DMD
408	048	DMD	DMD	DMD-3	batch2	Central	10.1763	-1.0162	20.3208	-1.89741	2.86289	-2.51116	-6.27284	10.5434	DMD
409	049	DMD	DMD	DMD-3	batch2	Distal	14.9898	-0.797212	20.552	-3.47859	4.74408	-3.31723	-6.47263	11.5515	DMD
410	050	DMD	DMD	DMD-3	batch2	Distal	9.29442	-1.66791	20.2013	-1.34119	1.2956	-2.49763	-6.36508	9.46746	DMD
411	051	DMD	DMD	DMD-3	batch2	Distal	6.54505	-2.98701	19.4931	-1.15423	-0.829951	-1.5606	-5.88607	8.86513	DMD
412	052	DMD	DMD	DMD-3	batch2	Distal	8.44881	-0.885716	19.8167	-0.902175	2.38156	-1.99675	-6.18561	10.1206	DMD
413	053	DMD	DMD	DMD-3	batch2	Distal	-1.00839	3.26715	18.5729	-1.54051	1.32534	-2.81748	-6.87157	9.37177	DMD
414	054	DMD	DMD	DMD-3	batch2	Distal	1.88424	3.14483	18.7536	-1.36766	1.98378	-3.45924	-7.15087	9.65634	DMD
415	055	DMD	DMD	DMD-3	batch2	Distal	11.2575	1.13941	19.8275	-2.42354	4.4636	-4.11825	-7.14254	11.6218	DMD
416	056	DMD	DMD	DMD-3	batch2	Distal	-0.884536	2.09689	18.6123	-1.56244	-0.121733	-2.78021	-6.53419	8.9931	DMD
417	057	DMD	DMD	DMD-3	batch2	Distal	-3.8111	4.61392	18.7731	-1.93813	0.712905	-2.45957	-7.02116	9.16143	DMD
418	058	DMD	DMD	DMD-3	batch2	Distal	3.93256	0.155037	18.7932	-1.10214	0.345214	-1.46612	-5.74932	9.00916	DMD

## Sheet: DEG DMD vs WT
	names	scores	logfoldchanges	pvals	pvals_adj
0	Peg3	74.6027	33.5053	1.10257e-142	9.39612e-139
1	Tnfrsf23	62.5368	33.0799	1.07342e-128	3.04922e-125
2	Tubb6	58.3346	33.8581	3.07348e-123	5.23843e-120
3	Ahnak2	58.1156	33.0682	6.04854e-123	8.59094e-120
4	Tnnt2	56.0771	34.2655	3.68516e-120	3.92562e-117
5	DMD	48.2292	32.4712	1.55627e-108	1.10521e-105
6	Myl4	47.003	33.3787	1.42409e-106	9.33544e-104
7	Dynlt1a	46.4085	31.766	1.31902e-105	8.02908e-103
8	C1qa	45.728	33.7071	1.73589e-104	9.86218e-102
9	Per3	44.8557	32.4267	4.95016e-103	2.63658e-100
10	Pygo2	43.9478	32.3836	1.71556e-101	8.12224e-99
11	Loxl1	43.389	32.6644	1.56707e-100	7.02871e-98
12	Fcer1g	41.5858	34.1706	2.32082e-97	8.24086e-95
13	Ctss	41.2889	34.8189	7.91249e-97	2.69721e-94
14	Cpe	40.922	1.51462	2.18929e-117	2.07301e-114
15	Atp6v1a	40.4199	32.3153	2.98621e-95	9.78786e-93
16	Ptp4a2	40.2065	1.57181	7.8095e-123	9.50751e-120
17	Serpinb6a	39.7572	2.10123	2.86019e-99	1.21873e-96
18	Serpina3n	39.3644	32.328	2.67185e-93	8.13197e-91
19	Ctsb	38.9987	2.36129	3.44359e-109	2.66784e-106
20	Dusp14	38.7938	32.0797	3.15435e-92	9.26943e-90
21	Plekho2	38.5485	32.9732	9.19972e-92	2.52903e-89
22	Lox	38.5044	32.446	1.11546e-91	2.9706e-89
23	Tcap	38.1316	1.29234	6.02337e-117	5.13312e-114
24	Rap1gap2	38.1125	32.2504	6.2429e-91	1.61218e-88
25	Appbp2	37.9389	31.9648	1.34449e-90	3.36993e-88
26	Tnfaip2	36.175	2.03499	8.65794e-92	2.45943e-89
27	Klf5	36.1201	31.9861	4.91115e-87	1.0208e-84
28	Lyz1	35.9162	32.7939	1.2561e-86	2.54869e-84
29	Cybb	35.7627	33.1136	2.55266e-86	5.05901e-84
30	Tsc22d4	35.6915	31.7609	3.5502e-86	6.8761e-84
31	Nav1	35.6828	32.1646	3.69704e-86	7.00137e-84
32	Agtrap	35.5239	31.8968	7.73236e-86	1.40202e-83
33	Col14a1	35.4805	32.4741	9.46634e-86	1.68067e-83
34	Dgkz	35.4108	32.3072	1.30993e-85	2.2782e-83
35	Fbn1	35.1014	32.291	5.56964e-85	9.1933e-83
36	Lgals3	35.0998	34.4714	5.60962e-85	9.1933e-83
37	Cttn	34.8099	31.9215	2.19628e-84	3.53146e-82
38	Mdga1	34.7261	31.8417	3.26462e-84	5.15206e-82
39	Cpne2	34.6776	31.8276	4.10623e-84	6.36242e-82
40	Numa1	34.5243	31.9623	8.49848e-84	1.29329e-81
41	Prune2	34.4489	4.70495	9.29129e-77	7.68742e-75
42	Mcrip1	34.3032	31.6446	2.43546e-83	3.64123e-81
43	Cd53	34.2798	33.0519	2.72323e-83	4.00126e-81
44	Pak1	34.2517	4.83545	8.28099e-81	9.0051e-79
45	C4b	34.1425	32.0826	5.24901e-83	7.58171e-81
46	Armcx2	34.0426	32.3615	8.47366e-83	1.20354e-80
47	Fosl2	33.9944	31.9624	1.06832e-82	1.4925e-80
48	Riok1	33.9774	31.8047	1.15901e-82	1.59308e-80
49	Ep400	33.8785	31.7084	1.86553e-82	2.48407e-80
50	Xpo6	33.8631	32.2071	2.00909e-82	2.63408e-80
51	Map1lc3a	33.8587	1.66069	2.02439e-90	4.92911e-88
52	S100a4	33.6866	33.3038	4.70941e-82	5.99009e-80
53	Atrnl1	33.6474	31.8275	5.69254e-82	7.0307e-80
54	Actb	33.6068	2.37588	9.20865e-95	2.90652e-92
55	Mrc1	33.559	32.5499	8.73415e-82	1.06332e-79
56	Fem1b	33.5297	31.6317	1.00677e-81	1.2084e-79
57	Rap2b	33.3879	32.5195	2.00563e-81	2.37388e-79
58	Myadm	33.2948	31.912	3.15653e-81	3.63513e-79
59	Chrna1	33.2863	5.35046	6.6357e-102	3.32644e-99
60	Fbxl22	33.176	31.7903	5.63655e-81	6.40462e-79
61	Adam19	33.1054	32.0013	7.96079e-81	8.81063e-79
62	Anxa1	33.0958	32.4031	8.34784e-81	9.0051e-79
63	Pycr2	33.0078	31.7494	1.28468e-80	1.35161e-78
64	Tmsb10	32.9062	4.02733	2.17055e-97	8.04234e-95
65	Acot9	32.7406	31.7773	4.78262e-80	4.91055e-78
66	Cbx6	32.6269	31.8185	8.38986e-80	8.51171e-78
67	S100a13	32.5169	31.8342	1.44637e-79	1.41678e-77
68	Rfx5	32.4815	31.8856	1.72389e-79	1.66943e-77
69	Igf2	32.4285	4.6727	5.63045e-82	7.0307e-80
70	Cacng1	32.3399	1.37183	8.36485e-72	4.68982e-70
71	Ctxn3	32.2941	2.40393	1.04683e-77	9.39063e-76
72	Maged1	32.2628	32.047	5.11419e-79	4.84257e-77
73	Col5a3	32.2564	31.9817	5.28152e-79	4.94606e-77
74	Vash2	32.2415	32.4146	5.68694e-79	5.26784e-77
75	Arpc1b	31.7314	32.5191	7.34321e-78	6.72891e-76
76	Tbc1d23	31.6626	31.7823	1.03916e-77	9.39063e-76
77	Ier2	31.617	31.785	1.30782e-77	1.16096e-75
78	Cd55	31.6029	31.6693	1.40496e-77	1.23434e-75
79	Smarcd1	31.5541	31.754	1.79838e-77	1.56386e-75
80	Fgl2	31.2251	31.8052	9.5608e-77	7.83434e-75
81	Sulf2	31.1978	32.2869	1.09906e-76	8.83601e-75
82	Casq1	31.1236	0.933847	1.07451e-68	5.35497e-67
83	Sbk1	31.0736	31.5695	2.07276e-76	1.63556e-74
84	Postn	31.0404	32.6491	2.45633e-76	1.92045e-74
85	Tmem9	30.9423	31.4742	4.0615e-76	3.14656e-74
86	Srsf2	30.8355	2.02913	2.32463e-75	1.6932e-73
87	4632427E13Rik	30.7782	31.585	9.43474e-76	7.2435e-74
88	Lcp1	30.6993	32.9389	1.41649e-75	1.06826e-73
89	Ppt1	30.6839	31.9027	1.53374e-75	1.14653e-73
90	Timp1	30.6725	31.8964	1.62705e-75	1.20571e-73
91	Bclaf1	30.656	31.8605	1.77098e-75	1.30106e-73
92	Neat1	30.5145	2.71178	3.33888e-67	1.55486e-65
93	Lrrcc1	30.4949	31.6808	4.07483e-75	2.91813e-73
94	Sdc3	30.3757	32.1832	7.56097e-75	5.36955e-73
95	Mamstr	30.2333	31.4089	1.58515e-74	1.11642e-72
96	Marveld1	30.2055	31.6041	1.83267e-74	1.28017e-72
97	1700037H04Rik	30.1471	31.6537	2.48536e-74	1.72197e-72
98	Sln	30.0915	31.9822	3.32087e-74	2.2823e-72
99	Resf1	30.0674	31.8616	3.76727e-74	2.56837e-72
100	Nrros	29.974	32.6736	6.14143e-74	4.15375e-72
101	Rbm3	29.8155	2.30139	2.7108e-87	5.77535e-85
102	Pld3	29.7932	31.9775	1.58633e-73	1.0399e-71
103	Angptl2	29.7931	4.23011	5.35226e-70	2.73125e-68
104	Btbd8	29.7425	31.435	2.07108e-73	1.3371e-71
105	Srgap2	29.6794	31.5466	2.88805e-73	1.83672e-71
106	Alox5ap	29.6226	32.6474	3.89638e-73	2.45962e-71
107	Rae1	29.6108	31.4569	4.14716e-73	2.59868e-71
108	Meg3	29.5882	32.2055	4.67393e-73	2.90739e-71
109	Ifi30	29.5124	32.4669	6.97875e-73	4.30963e-71
110	Qsox1	29.445	31.7271	9.96995e-73	6.11251e-71
111	Vsir	29.4004	31.9026	1.26289e-72	7.68738e-71
112	Tns3	29.3877	31.8266	1.35124e-72	8.16685e-71
113	Pgam2	29.3354	0.960481	2.21595e-77	1.90751e-75
114	Zfp503	29.3345	31.4179	1.79202e-72	1.06794e-70
115	Fam91a1	29.3285	31.581	1.85006e-72	1.09487e-70
116	Fam214b	29.3197	31.6949	1.93794e-72	1.13898e-70
117	Crlf3	29.2864	31.7748	2.3139e-72	1.35062e-70
118	Gstp-ps	29.2049	0.887591	2.20058e-81	2.56895e-79
119	Scara3	29.1474	31.7264	4.85063e-72	2.79304e-70
120	Dera	29.0075	31.4533	1.02386e-71	5.66578e-70
121	Spred1	28.9735	31.5717	1.2285e-71	6.75438e-70
122	Supt16	28.9335	31.7673	1.52148e-71	8.25864e-70
123	Rbm6	28.7813	31.3668	3.44523e-71	1.84656e-69
124	Apoe	28.6675	3.34494	1.68904e-87	3.71506e-85
125	Tmem19	28.6573	31.4319	6.71712e-71	3.55548e-69
126	Pip4k2a	28.6559	31.7317	6.76771e-71	3.56015e-69
127	Antxr1	28.5157	31.5646	1.4426e-70	7.4508e-69
128	Cacna2d1	28.3005	1.40989	6.75111e-81	7.57012e-79
129	S100a6	28.081	2.15825	6.70703e-86	1.24255e-83
130	Mpp1	28.0224	4.29605	1.7452e-64	7.01537e-63
131	Vhl	28.0198	31.3103	2.1376e-69	1.07791e-67
132	Col3a1	28.0064	2.43797	3.77857e-85	6.44019e-83
133	Adamts5	27.9941	2.42128	6.19789e-67	2.85505e-65
134	Tmed10	27.9095	1.34988	1.0897e-75	8.29149e-74
135	Zfp715	27.7453	4.19172	4.2474e-72	2.46234e-70
136	Safb2	27.6924	31.5356	1.28855e-68	6.3474e-67
137	Zfp626	27.6567	31.3952	1.56874e-68	7.63931e-67
138	F830016B08Rik	27.6504	4.12423	1.61529e-70	8.29247e-69
139	Csnk1g3	27.5376	31.3562	3.02597e-68	1.46519e-66
140	2310015D24Rik	27.5084	31.1821	3.55538e-68	1.7118e-66
141	Ankrd1	27.4893	3.90669	3.85513e-79	3.6914e-77
142	H2-Aa	27.4686	2.65783	1.02765e-76	8.34058e-75
143	Mdk	27.3686	31.7836	7.71269e-68	3.69256e-66
144	Ftl1	27.3472	2.61287	1.48288e-82	2.00589e-80
145	Mt2	27.3173	5.34936	4.96282e-72	2.83847e-70
146	Ddx52	27.3006	31.266	1.12423e-67	5.3226e-66
147	Map1b	27.1936	4.20339	3.3273e-77	2.80745e-75
148	Gstp2	27.1038	0.859558	8.96689e-74	6.017e-72
149	Cd9	27.0667	1.65772	3.28665e-82	4.24377e-80
150	Gstp1	27.065	0.858112	1.81671e-73	1.18183e-71
151	Gpx4-ps2	27.0396	1.20923	6.65871e-63	2.4672e-61
152	Cul7	26.9761	31.841	6.86086e-67	3.14345e-65
153	Slfn5	26.9259	31.5263	9.08461e-67	4.11803e-65
154	Slc27a4	26.849	31.3255	1.39801e-66	6.3036e-65
155	Fam133b	26.7945	31.121	1.89752e-66	8.5109e-65
156	H2-Ab1	26.6396	2.76958	3.42511e-80	3.55961e-78
157	Cd44	26.6266	3.76791	1.08215e-80	1.15276e-78
158	Kctd17	26.5663	31.5752	6.85638e-66	2.99641e-64
159	Laptm5	26.5147	32.4136	9.17787e-66	3.97024e-64
160	Tnfrsf1b	26.5118	32.2301	9.32652e-66	4.01417e-64
161	Ankhd1	26.503	31.4167	9.80451e-66	4.1987e-64
162	Gpr153	26.4526	31.276	1.30336e-65	5.55363e-64
163	Fyco1	26.4433	1.14097	1.71121e-72	1.02697e-70
164	Myh8	26.2997	31.5609	3.0998e-65	1.29493e-63
165	Lyz2	26.2789	3.42276	1.00334e-79	1.00594e-77
166	Fam214a	26.2656	4.13229	6.33833e-64	2.47777e-62
167	Prdx4	26.2225	31.4515	4.80803e-65	1.98903e-63
168	Pcbp2	26.2018	0.807828	1.74766e-76	1.39192e-74
169	Atp6ap2	26.0411	2.11644	5.19247e-65	2.13769e-63
170	Itgb2	25.9837	32.5685	1.87453e-64	7.49987e-63
171	Ncf1	25.9114	32.4778	2.83497e-64	1.1237e-62
172	Actg1	25.8714	2.08616	2.51046e-77	2.13941e-75
173	Sec22a	25.7751	31.1618	6.19129e-64	2.43144e-62
174	Bgn	25.6946	4.24793	8.34809e-68	3.97443e-66
175	5430431A17Rik	25.6926	31.1755	9.94975e-64	3.87177e-62
176	Fcgr3	25.6758	32.056	1.09605e-63	4.24569e-62
177	Psap	25.6586	1.6825	7.02115e-77	5.8661e-75
178	Skap2	25.6523	31.5864	1.25472e-63	4.83835e-62
179	Anxa4	25.6362	2.84846	3.83236e-67	1.77497e-65
180	Arl6	25.6328	31.354	1.40327e-63	5.38677e-62
181	Klhl24	25.5897	1.11727	1.01696e-64	4.10736e-63
182	Igfbp5	25.5656	1.4935	7.47425e-66	3.24977e-64
183	Ahnak	25.4925	1.73835	1.14743e-62	4.14338e-61
184	Hmgn2	25.4725	3.81628	2.49647e-65	1.05322e-63
185	Pdcd4	25.3903	31.0381	5.69194e-63	2.13686e-61
186	Ehd4	25.3811	1.45103	2.09186e-73	1.34037e-71
187	Pnp	25.3667	31.6327	6.52593e-63	2.43921e-61
188	C1qtnf6	25.3357	31.559	7.80831e-63	2.88062e-61
189	Arid2	25.3246	31.052	8.32825e-63	3.0592e-61
190	Hexb	25.3201	31.8997	8.54529e-63	3.12545e-61
191	Itgal	25.2965	31.752	9.79977e-63	3.56896e-61
192	Myh3	25.2771	31.8864	1.09662e-62	3.97676e-61
193	Nfam1	25.1165	31.9415	2.7895e-62	9.98829e-61
194	Grb10	25.0984	3.88247	3.15503e-65	1.31157e-63
195	Plp2	25.0524	3.88785	1.54347e-61	5.36875e-60
196	C1qb	24.9888	3.83426	2.73454e-75	1.9749e-73
197	Gabarap	24.9583	1.08691	1.22262e-69	6.20186e-68
198	C1qc	24.9581	3.66844	5.91208e-71	3.14892e-69
199	Cox8a	24.9441	1.37618	9.95816e-72	5.54663e-70
200	Gak	24.9179	31.1478	8.88806e-62	3.11704e-60
201	Rsrp1	24.905	2.67073	8.95487e-57	2.67766e-55
202	Pgd	24.8991	31.5695	9.92271e-62	3.46563e-60
203	Hjurp	24.8233	4.02316	1.38196e-71	7.54938e-70
204	Chrnb1	24.7387	3.93232	1.57974e-63	6.037e-62
205	Man1c1	24.7335	31.6323	2.61814e-61	9.06985e-60
206	Mt1	24.7261	3.38253	2.7959e-60	9.16411e-59
207	Pid1	24.5883	31.4712	6.14887e-61	2.10444e-59
208	Cdc42	24.5699	1.18927	1.11393e-73	7.35884e-72
209	Ciart	24.5629	31.1695	7.14171e-61	2.43447e-59
210	F13a1	24.5321	31.3853	8.56553e-61	2.89665e-59
211	Kmt2e	24.4733	3.90606	8.1204e-53	2.03536e-51
212	Eif5a	24.4364	0.82734	3.51712e-64	1.38763e-62
213	Clec3b	24.3694	31.1873	2.23857e-60	7.39423e-59
214	Ctsa	24.3386	2.58954	7.7712e-65	3.16872e-63
215	Abca1	24.3357	3.80989	1.35064e-59	4.29484e-58
216	Fth1	24.3101	0.877199	1.16744e-68	5.78426e-67
217	Npm1	24.1605	1.40601	7.42863e-71	3.88385e-69
218	Col1a2	24.1446	2.08089	1.82465e-71	9.84157e-70
219	Anxa5	24.085	1.69833	8.09672e-72	4.60002e-70
220	Trip4	24.072	30.9985	1.30832e-59	4.17583e-58
221	Tgfbi	24.0396	4.1328	5.78632e-65	2.37072e-63
222	Mustn1	23.9612	1.32459	8.58248e-65	3.48285e-63
223	Nfic	23.9222	1.10058	1.7897e-63	6.80884e-62
224	Orai1	23.9105	2.18164	2.15707e-51	5.05016e-50
225	Aplp2	23.847	1.18237	3.39375e-62	1.20506e-60
226	Nes	23.7928	3.84043	2.51789e-56	7.34844e-55
227	Kdelr2	23.6675	1.79401	1.25424e-54	3.3718e-53
228	Ptms	23.5523	1.50135	3.71607e-66	1.64085e-64
229	R3hdm4	23.4013	1.13193	9.58127e-61	3.22734e-59
230	Scn1b	23.2504	0.794775	2.96522e-62	1.05731e-60
231	Ckap4	23.2236	4.16112	7.46402e-69	3.74167e-67
232	Eif4b	23.1797	0.960855	2.47533e-60	8.1447e-59
233	Mymk	23.1694	32.0126	2.97111e-57	9.01062e-56
234	Hbp1	23.1618	1.38662	1.5502e-56	4.5712e-55
235	Hrc	23.1258	0.926744	1.31572e-68	6.44402e-67
236	Gpx1	23.1155	1.82563	5.96212e-62	2.09955e-60
237	Tfrc	23.0821	1.28951	1.43107e-59	4.53368e-58
238	Fbxl18	23.0466	30.8688	6.26446e-57	1.88642e-55
239	Septin7	22.9987	1.18745	2.7343e-63	1.03105e-61
240	Psma6	22.9081	1.14927	1.8294e-60	6.06621e-59
241	Eif3l	22.8588	1.06024	1.14207e-67	5.37718e-66
242	Hnrnpf	22.8425	3.57839	8.00992e-58	2.44662e-56
243	Glul	22.8406	1.96352	1.83976e-48	3.824e-47
244	Mybpc1	22.8013	0.906857	5.25004e-62	1.85647e-60
245	Mef2c	22.7988	0.920183	1.9487e-67	9.12464e-66
246	Grn	22.7827	3.29404	2.33114e-65	9.88356e-64
247	Tuba1b	22.7721	2.56278	4.12911e-66	1.81383e-64
248	Ccl21a	22.6092	30.9874	9.07503e-56	2.59521e-54
249	Adcy4	22.5868	30.989	1.04143e-55	2.94853e-54
250	Pi16	22.571	4.27149	2.16384e-66	9.6546e-65
251	Pcbp1	22.5679	1.09022	3.28624e-59	1.02961e-57
252	Arpc5	22.5391	2.6226	1.12324e-60	3.76861e-59
253	Map3k20	22.5137	1.15775	8.10888e-54	2.11975e-52
254	Kif1c	22.5007	1.1052	6.62059e-63	2.46379e-61
255	Jund	22.4855	1.86375	1.62464e-55	4.50982e-54
256	Rpa1	22.4676	3.60877	9.1105e-56	2.59664e-54
257	Tubb5	22.4586	2.3266	3.51031e-66	1.55806e-64
258	Fzd4	22.3511	3.60883	5.7439e-52	1.38275e-50
259	Mgl2	22.3181	30.976	5.44674e-55	1.48298e-53
260	Ccnt2	22.2661	3.62903	1.2707e-56	3.76003e-55
261	Fam98b	22.2571	1.89764	2.3182e-52	5.69328e-51
262	Hoxd8	22.229	30.8579	9.4442e-55	2.55503e-53
263	Ccser2	22.1961	1.07112	3.05071e-59	9.59342e-58
264	Ucp2	22.1412	2.9967	2.06366e-63	7.81622e-62
265	Ypel3	22.1319	1.23534	6.89427e-54	1.81336e-52
266	Zdbf2	22.0225	30.8908	3.3977e-54	9.0485e-53
267	Acta1	21.9548	0.638547	3.51997e-61	1.21446e-59
268	Rtn4	21.9415	0.737477	6.7696e-56	1.95561e-54
269	Ppp2ca	21.928	0.859878	4.51722e-56	1.30938e-54
270	Gnas	21.8988	0.664232	3.57507e-61	1.2285e-59
271	Ftl1-ps1	21.8951	2.28458	1.50488e-60	5.02926e-59
272	Adamts12	21.8868	31.0221	7.90436e-54	2.07265e-52
273	Pabpc1	21.8316	2.02046	6.13134e-58	1.87954e-56
274	Rbfox2	21.8017	3.6675	1.83585e-56	5.39488e-55
275	Firre	21.7546	3.78648	7.26027e-61	2.46502e-59
276	Ywhag	21.7515	1.13669	6.81213e-60	2.1868e-58
277	Cdkn1a	21.7193	3.98511	1.70449e-59	5.37988e-58
278	Dlgap4	21.6984	3.61044	1.53572e-50	3.45315e-49
279	Ptprs	21.687	3.6896	6.1437e-52	1.47483e-50
280	Cst3	21.6455	1.09663	9.41134e-57	2.80432e-55
281	Lrrfip1	21.6383	1.65648	3.72234e-51	8.62005e-50
282	Mafb	21.6087	3.79161	3.50058e-60	1.13e-58
283	Ppp3ca	21.5865	1.13162	1.20342e-54	3.24542e-53
284	Serinc5	21.5588	30.7849	6.1378e-53	1.54753e-51
285	Itgav	21.5411	3.5449	8.11778e-56	2.32928e-54
286	Tmsb4x	21.5099	1.55035	1.64013e-62	5.89755e-61
287	Csde1	21.4886	0.578832	5.1455e-51	1.17876e-49
288	Csnk2a1	21.4751	1.23351	2.67724e-54	7.15218e-53
289	Tcf25	21.4406	1.45468	1.79352e-48	3.73702e-47
290	Celf2	21.4321	1.72588	1.20174e-47	2.42108e-46
291	Snrnp70	21.3516	3.6296	5.61812e-58	1.72843e-56
292	Cdkn1c	21.3354	2.19479	6.86198e-52	1.64263e-50
293	Cd81	21.099	1.30457	3.27797e-49	6.98371e-48
294	H2-Eb1	21.0915	2.29673	2.05475e-58	6.34442e-57
295	Lims1	21.0787	3.50023	5.2884e-53	1.33732e-51
296	Cltc	21.0425	1.38401	8.96671e-53	2.24089e-51
297	Capns1	21.0027	0.717528	2.90424e-52	7.11205e-51
298	Ldha	20.9512	0.501057	3.70414e-50	8.22048e-49
299	Eef1a1	20.9293	1.58747	2.98932e-60	9.76052e-59
300	Serpinh1	20.8954	1.47707	3.35555e-60	1.09145e-58
301	Trip6	20.8569	3.6054	2.28716e-55	6.32831e-54
302	Csf2ra	20.8279	31.6535	6.19741e-51	1.41215e-49
303	Atp6v1b2	20.8277	1.39261	5.23357e-55	1.4295e-53
304	B2m	20.8224	1.33503	3.37873e-60	1.09481e-58
305	Rnh1	20.8174	3.50955	9.72721e-54	2.5273e-52
306	Myh9	20.8095	3.68558	1.45812e-55	4.07413e-54
307	Vkorc1	20.8073	3.39849	1.57341e-55	4.38189e-54
308	Rtn2	20.7942	0.874376	1.29398e-53	3.35176e-52
309	Cilp	20.7647	2.03845	1.29763e-47	2.60812e-46
310	Gpx3	20.7404	1.07928	4.6488e-48	9.52333e-47
311	Vim	20.7398	2.3433	6.82573e-60	2.1868e-58
312	Ctsz	20.7335	3.8508	1.40879e-55	3.94926e-54
313	Deptor	20.7089	2.05791	2.62022e-45	4.76109e-44
314	Ctsc	20.6596	2.04774	2.56161e-48	5.27295e-47
315	Sh3bgrl3	20.6236	2.87371	4.29351e-59	1.33538e-57
316	Ppp2r3a	20.5967	0.938833	1.42855e-54	3.82832e-53
317	Fam111a	20.5836	3.78374	4.12361e-59	1.28723e-57
318	S100a10	20.4485	3.67457	5.31507e-57	1.60621e-55
319	Pdha1	20.438	0.851488	1.42936e-58	4.42947e-57
320	Lmna	20.4377	1.81168	1.32836e-57	4.04296e-56
321	Cd63	20.3206	1.38746	4.22844e-55	1.16241e-53
322	Rnasek	20.2771	1.48809	2.32091e-47	4.65383e-46
323	Tfg	20.2244	1.00593	2.10419e-53	5.41749e-52
324	Tusc1	20.1696	3.6967	4.78584e-55	1.31141e-53
325	Ccdc80	20.1139	3.60438	4.10301e-56	1.19337e-54
326	Rnf19a	19.9847	3.1873	7.17376e-53	1.80339e-51
327	Sod3	19.9749	3.58538	4.9679e-54	1.3148e-52
328	Arf3	19.9597	3.42538	3.09405e-51	7.20424e-50
329	Gpx4	19.9503	0.864881	1.05961e-46	2.05695e-45
330	Serping1	19.9186	1.26061	1.06919e-56	3.17479e-55
331	Itga7	19.9174	2.03968	1.78253e-44	3.10015e-43
332	Plac9a	19.9014	31.4386	2.3586e-48	4.89052e-47
333	Plac9b	19.8965	31.4037	2.43478e-48	5.03621e-47
334	Tcf7l2	19.8776	3.39007	7.73051e-50	1.68921e-48
335	St3gal1	19.876	3.46959	2.60515e-53	6.66699e-52
336	Csf1r	19.8414	2.80736	8.89663e-54	2.31857e-52
337	Bloc1s6	19.839	3.2497	3.83369e-46	7.29257e-45
338	Map4k4	19.7766	3.6272	1.0326e-55	2.93326e-54
339	Ddah1	19.7557	3.35564	1.93181e-52	4.77185e-51
340	Gas1	19.746	3.25239	1.49659e-49	3.23705e-48
341	Rhob	19.746	3.37686	2.32696e-50	5.1912e-49
342	Sparc	19.7456	1.51347	7.07133e-56	2.03587e-54
343	Slc44a2	19.6999	1.28906	6.83791e-45	1.22165e-43
344	Zmiz1	19.6896	3.48775	2.05276e-43	3.33211e-42
345	Pomp	19.6757	0.951272	4.4175e-53	1.12041e-51
346	Gpi1	19.6623	0.865083	5.18973e-47	1.02377e-45
347	Actc1	19.6474	3.01464	1.19046e-45	2.20546e-44
348	Ccl6	19.6243	4.06234	1.05885e-55	2.98792e-54
349	Lgals1	19.6222	1.2838	1.11181e-55	3.12702e-54
350	Utp3	19.5826	3.30271	1.21973e-48	2.55395e-47
351	Ache	19.5543	3.37684	9.62343e-53	2.39798e-51
352	Pltp	19.5195	3.72528	4.92946e-52	1.19005e-50
353	Pik3ip1	19.5181	3.32396	2.96932e-52	7.25058e-51
354	Gamt	19.4896	3.26173	8.7424e-48	1.76966e-46
355	Igf2r	19.4827	3.29408	6.97834e-46	1.31279e-44
356	Armt1	19.464	3.24127	4.81953e-51	1.10706e-49
357	Sfswap	19.4598	3.26388	4.18669e-49	8.83142e-48
358	Cbfb	19.4557	1.12656	2.26394e-45	4.1225e-44
359	Golt1b	19.4553	3.2444	6.26745e-50	1.38013e-48
360	Fnta	19.4515	0.953502	5.87072e-49	1.23532e-47
361	Sap18b	19.3941	0.906812	2.54601e-53	6.53527e-52
362	Hspg2	19.3764	3.45734	1.16737e-52	2.90037e-51
363	Atp1b2	19.3709	1.40805	3.81859e-53	9.71404e-52
364	Tuba1a	19.3658	3.34232	1.2976e-49	2.81378e-48
365	Hdgf	19.3618	0.64337	3.83662e-51	8.86063e-50
366	Tagln2	19.35	3.74187	3.96171e-52	9.61871e-51
367	Esyt1	19.3497	3.51514	1.03993e-44	1.82727e-43
368	Crip1	19.3488	2.07035	1.63595e-53	4.22471e-52
369	Iqgap1	19.346	2.6082	4.23293e-52	1.0248e-50
370	H13	19.3445	3.18049	2.5104e-48	5.18006e-47
371	Galnt17	19.344	3.32022	1.48099e-50	3.33888e-49
372	D5Ertd579e	19.3383	1.21047	3.91312e-54	1.03887e-52
373	Washc2	19.3336	3.30962	3.72469e-49	7.87638e-48
374	Selenop	19.3327	1.45354	6.99308e-50	1.53595e-48
375	Bin1	19.3242	0.730965	5.0263e-46	9.49759e-45
376	F2r	19.3117	3.39754	3.04128e-52	7.40509e-51
377	Gstm2	19.2999	0.982898	3.28844e-51	7.636e-50
378	Man2a1	19.2821	2.49768	8.13548e-51	1.8439e-49
379	Emp1	19.2702	3.48638	5.82183e-48	1.18128e-46
380	Gpnmb	19.2225	32.9951	1.95548e-46	3.74485e-45
381	Clic1	19.198	32.0641	2.29573e-46	4.3866e-45
382	Dot1l	19.1873	3.33905	4.8282e-50	1.06596e-48
383	Eno1	19.1548	1.3916	9.15857e-52	2.18015e-50
384	Map1lc3b	19.1185	0.632043	7.13718e-50	1.56357e-48
385	Pfkfb3	19.0989	2.27407	9.51192e-47	1.85493e-45
386	Shisa5	19.0921	3.48991	3.34207e-53	8.52728e-52
387	Ptbp3	19.0921	3.4327	8.23947e-52	1.96686e-50
388	Hip1	19.0817	3.36766	2.87217e-47	5.74569e-46
389	Sap18	19.0755	0.851274	2.0855e-52	5.1366e-51
390	Bsg	19.0515	0.665956	4.79237e-48	9.7939e-47
391	Neb	19.0403	0.687597	5.70352e-45	1.02327e-43
392	Col1a1	19.0004	2.25338	9.19124e-49	1.92925e-47
393	Slc12a6	19	1.38024	6.88856e-45	1.22812e-43
394	Samhd1	18.9811	3.47546	1.51828e-51	3.5941e-50
395	Ube2d1	18.9166	0.908412	8.59206e-44	1.43011e-42
396	Efhd2	18.903	32.0878	1.59187e-45	2.92368e-44
397	Apobec1	18.8582	32.101	2.13781e-45	3.90115e-44
398	Ddr2	18.8528	3.24937	3.56989e-48	7.33075e-47
399	Col6a2	18.8402	1.74427	1.08531e-51	2.57633e-50
400	Klhl40	18.7975	1.57992	1.07381e-42	1.67909e-41
401	Wbp2	18.7937	1.07436	9.64204e-46	1.79802e-44
402	Ankrd13a	18.7837	3.2488	2.51992e-44	4.32958e-43
403	Fscn1	18.76	3.76053	1.75866e-52	4.35677e-51
404	Crtap	18.7178	1.72386	4.21096e-47	8.36499e-46
405	Clk1	18.711	1.78877	6.52532e-44	1.09466e-42
406	Atp5mpl	18.7109	0.742361	7.12407e-51	1.61897e-49
407	Gprc5b	18.6765	2.22332	6.72967e-47	1.3184e-45
408	Mapre1	18.6508	1.38898	5.87686e-47	1.15398e-45
409	Fn1	18.6411	2.57421	2.61763e-50	5.82439e-49
410	Snhg9	18.6235	31.3562	1.0052e-44	1.7699e-43
411	Hmga1b	18.5789	3.00513	2.20059e-40	2.96732e-39
412	Col5a2	18.5565	2.63576	1.63236e-49	3.52177e-48
413	Cog1	18.5523	3.1857	1.33687e-45	2.46597e-44
414	Uba52	18.5355	0.61953	2.40419e-51	5.61328e-50
415	Acvr1	18.5241	3.27671	8.46686e-47	1.65492e-45
416	Lama2	18.5207	3.13706	2.19444e-44	3.78563e-43
417	Cd74	18.5162	2.15519	5.28453e-51	1.20737e-49
418	Ckb	18.506	31.4475	2.18759e-44	3.78147e-43
419	Tuba1c	18.49	3.80135	1.81118e-51	4.26379e-50
420	Ccl9	18.4891	31.9504	2.44711e-44	4.21299e-43
421	Mtpn	18.4867	3.2731	2.09374e-49	4.50576e-48
422	Gigyf1	18.4781	3.22723	1.37699e-46	2.66093e-45
423	Gns	18.4563	3.33416	1.43977e-44	2.50914e-43
424	Adss	18.4376	3.32235	4.26351e-51	9.81991e-50
425	Plxna1	18.4271	3.45208	2.06874e-50	4.62723e-49
426	Pitx2	18.4265	3.12705	3.43647e-47	6.84244e-46
427	Chd4	18.4126	3.17509	2.94008e-45	5.33093e-44
428	Psmc2	18.3924	0.849252	4.20672e-50	9.31161e-49
429	Mpeg1	18.3857	32.1761	4.85508e-44	8.22564e-43
430	Capg	18.3752	31.8958	5.20602e-44	8.80272e-43
431	Agl	18.3748	0.722762	2.39591e-43	3.88174e-42
432	Bhlhe40	18.3723	1.80567	1.26117e-43	2.07085e-42
433	Ccdc88c	18.3518	3.05211	2.96628e-44	5.04943e-43
434	Anxa11	18.351	2.92782	6.75674e-40	8.81791e-39
435	Kxd1	18.3421	0.574451	1.65987e-50	3.72247e-49
436	Ebf1	18.3383	3.17831	1.10778e-46	2.14557e-45
437	Pdlim3	18.3145	0.83734	6.35511e-44	1.06821e-42
438	Myoz3	18.2943	0.917657	2.17849e-44	3.77339e-43
439	Fam219a	18.2825	3.06078	9.66961e-43	1.51758e-41
440	Stom	18.2811	1.69115	2.98516e-40	3.98115e-39
441	Col5a1	18.2753	2.47331	3.68996e-49	7.82235e-48
442	Spi1	18.264	32.2342	1.08969e-43	1.79967e-42
443	Sgk1	18.2435	1.19229	7.70848e-46	1.44695e-44
444	Cxxc5	18.2323	3.09388	9.22005e-45	1.63354e-43
445	Ywhab	18.2281	1.39964	1.02199e-46	1.98844e-45
446	Srrm2	18.2174	2.10061	5.32652e-41	7.41709e-40
447	Fxyd5	18.2074	31.9554	1.58806e-43	2.59758e-42
448	Zfp36l1	18.2068	3.03148	4.53109e-45	8.1464e-44
449	Son	18.1925	1.42862	1.79669e-41	2.60841e-40
450	Dstn	18.1734	31.0564	1.99091e-43	3.23788e-42
451	Pwwp3a	18.1581	3.29698	9.92633e-44	1.64576e-42
452	Capzb	18.1348	0.617642	5.49949e-48	1.11854e-46
453	Lmbrd2	18.1203	3.20783	9.70318e-46	1.80547e-44
454	AI467606	18.1118	31.8576	3.00006e-43	4.83299e-42
455	Atrx	18.0444	1.71096	9.96137e-44	1.64837e-42
456	Cryab	18.0433	0.591667	2.90655e-49	6.22352e-48
457	Wls	18.0364	3.15563	8.62478e-45	1.53126e-43
458	Zfr	18.0222	1.09293	3.83e-45	6.91511e-44
459	Vcp	18.016	0.862197	3.48225e-43	5.58865e-42
460	Csnk2a3	18.01	2.83964	2.93716e-41	4.19974e-40
461	Ecm1	18.0038	3.31456	2.69272e-49	5.78019e-48
462	Litaf	18.0018	3.61185	1.25838e-49	2.7357e-48
463	Sgcg	17.9994	0.598798	1.45839e-46	2.81185e-45
464	Naca	17.9869	1.31525	6.06755e-44	1.02189e-42
465	Calr	17.9646	1.16289	1.65164e-46	3.17726e-45
466	Mcoln1	17.9447	3.10518	1.20767e-44	2.10896e-43
467	Fabp5	17.9437	31.8758	9.20812e-43	1.44782e-41
468	Fnbp4	17.939	3.30026	1.71801e-45	3.14857e-44
469	Lsp1	17.9206	2.26087	9.78575e-45	1.72659e-43
470	Phkg1	17.9199	1.57939	3.9456e-41	5.55776e-40
471	Dcn	17.9142	1.11284	3.16115e-49	6.75171e-48
472	Nexn	17.8598	0.822563	3.88131e-46	7.36672e-45
473	Cd68	17.8327	32.1283	1.93364e-42	2.99065e-41
474	Gltp	17.8183	3.41888	5.39085e-48	1.09906e-46
475	Pa2g4	17.8009	3.10374	3.75695e-42	5.71727e-41
476	Atf7ip	17.7814	3.20198	2.96851e-44	5.04943e-43
477	Itm2a	17.7747	1.20702	2.81511e-44	4.81734e-43
478	Mbd1	17.7539	3.11346	1.42307e-42	2.21708e-41
479	Itgb1bp2	17.7513	0.970316	1.74044e-48	3.6353e-47
480	1700109H08Rik	17.7495	3.31766	3.26359e-47	6.51343e-46
481	Lhfpl2	17.7306	31.6192	3.83084e-42	5.80897e-41
482	Tubb2a	17.7185	31.4381	4.15533e-42	6.28983e-41
483	Klhl41	17.6624	0.587156	1.31451e-45	2.43e-44
484	Per1	17.6613	31.1182	6.09836e-42	9.14969e-41
485	Cited4	17.6294	3.12107	1.35061e-40	1.85643e-39
486	Tyrobp	17.6263	31.7048	7.71275e-42	1.14509e-40
487	Stmn1	17.6203	31.4235	8.02928e-42	1.19001e-40
488	Dipk2a	17.6163	31.3605	8.246e-42	1.22001e-40
489	Dpysl3	17.6137	31.2536	8.39168e-42	1.23941e-40
490	Srsf6	17.6095	1.89769	1.75262e-42	2.71561e-41
491	Tgfbr3	17.6058	3.11173	1.13447e-44	1.98521e-43
492	Fto	17.603	1.15174	3.30191e-43	5.30922e-42
493	Nctc1	17.5993	1.73245	4.61877e-38	5.22031e-37
494	Sft2d2	17.5821	3.08921	7.47226e-42	1.11132e-40
495	Tnfsf12	17.5709	3.12032	1.38949e-45	2.55751e-44
496	Gmfg	17.566	31.0408	1.15569e-41	1.69514e-40
497	Mapk1ip1l	17.5653	31.09	1.1614e-41	1.70059e-40
498	Vcp-rs	17.5343	1.37622	2.04991e-40	2.77291e-39
499	Sgpl1	17.5294	31.4019	1.47747e-41	2.15599e-40
500	Timp2	17.5165	1.58958	4.07385e-43	6.51358e-42
501	AW549877	17.5105	3.09633	6.53916e-44	1.09483e-42
502	L3mbtl3	17.5088	3.11789	4.3865e-44	7.44656e-43
503	Hcfc1	17.482	3.20923	2.33742e-41	3.36477e-40
504	Dync1i2	17.4815	0.977848	6.05132e-42	9.09512e-41
505	Gprc5c	17.4806	31.3248	2.05216e-41	2.96918e-40
506	Pim1	17.4629	31.0003	2.31048e-41	3.33163e-40
507	Eno1b	17.461	1.32315	3.91389e-45	7.05162e-44
508	Pdxk	17.46	3.24953	9.61978e-46	1.7978e-44
509	Mob4	17.4476	1.22756	1.62444e-41	2.36236e-40
510	Hif1a	17.436	3.18659	9.31059e-45	1.64616e-43
511	C330007P06Rik	17.4191	30.1848	3.10291e-41	4.4219e-40
512	Myo1e	17.3979	3.31945	1.02359e-42	1.6035e-41
513	Gnb1	17.3959	1.82447	3.11235e-41	4.42796e-40
514	Etv5	17.3885	3.13129	8.27152e-46	1.54923e-44
515	Pde4dip	17.3854	0.892244	5.80588e-46	1.09464e-44
516	Cnn3	17.3811	3.13558	1.72461e-43	2.81553e-42
517	Mmp2	17.3785	1.57998	7.02204e-39	8.53664e-38
518	Gga2	17.3557	3.2155	1.69423e-46	3.25185e-45
519	Pfn1	17.3436	1.18812	1.12974e-45	2.09752e-44
520	Gadd45g	17.3359	2.23868	1.83576e-38	2.1638e-37
521	Psen2	17.3324	3.12651	4.23997e-46	8.02956e-45
522	Cped1	17.318	3.02498	8.17524e-40	1.06042e-38
523	Maf	17.3177	1.14228	8.12429e-45	1.44541e-43
524	Nfkbia	17.3091	1.51235	2.02314e-42	3.1234e-41
525	Cfl1	17.2982	1.51609	2.86057e-46	5.45364e-45
526	Hbs1l	17.2918	1.069	1.03329e-41	1.51822e-40
527	Gmfg-ps	17.2856	30.8424	7.62509e-41	1.05318e-39
528	Gpc1	17.2767	1.29181	2.65341e-44	4.54978e-43
529	Degs1	17.262	2.95859	2.64436e-42	4.06773e-41
530	Aebp1	17.2107	1.72078	5.22387e-41	7.28606e-40
531	Ogdh	17.2054	0.630249	1.91652e-43	3.12287e-42
532	Col6a3	17.2035	2.17792	1.19949e-43	1.97337e-42
533	Tapt1	17.1977	2.98259	4.69626e-41	6.56926e-40
534	Itm2c	17.193	30.8906	1.42402e-40	1.95418e-39
535	Setd1b	17.1885	3.20886	5.71823e-45	1.02376e-43
536	Rere	17.1882	1.42566	9.58796e-42	1.4112e-40
537	Flvcr1	17.1804	31.4929	1.55047e-40	2.12089e-39
538	Cep170	17.1633	3.01852	3.18802e-42	4.86887e-41
539	Svil	17.1571	0.620412	1.09381e-44	1.91799e-43
540	Tmbim1	17.1407	30.9591	2.02747e-40	2.74692e-39
541	Rsrc2	17.136	1.22997	3.00258e-42	4.60215e-41
542	Psmg4	17.1322	3.03287	2.86207e-43	4.61942e-42
543	Ccnd3	17.1305	3.07263	7.08184e-44	1.18336e-42
544	Atp1a2	17.1243	0.71243	3.79866e-43	6.085e-42
545	Sumo3	17.1243	1.00089	7.73106e-43	1.22234e-41
546	Map4	17.1027	0.979084	1.09317e-42	1.70622e-41
547	Cd109	17.0773	31.0658	3.11081e-40	4.14223e-39
548	Rad21	17.0566	1.63695	2.37754e-39	3.00615e-38
549	Lrpap1	17.0469	30.7971	3.82233e-40	5.07382e-39
550	Cacng6	17.0148	1.03645	2.98041e-40	3.98105e-39
551	Antxr2	17.0082	30.8651	4.96489e-40	6.53954e-39
552	Pabpn1	17.0052	3.14799	9.64062e-41	1.32726e-39
553	Slc25a24	17.0038	31.1861	5.11376e-40	6.71487e-39
554	Herc4	17.0008	3.02626	2.13758e-40	2.88692e-39
555	Tob2	16.9851	2.97769	6.17382e-41	8.54112e-40
556	Fopnl	16.9771	0.863921	5.89305e-44	9.94467e-43
557	Mphosph8	16.9669	3.032	8.47309e-42	1.24927e-40
558	Bcdin3d	16.9592	30.4963	6.91677e-40	8.99919e-39
559	Wdr43	16.9533	2.9319	6.20744e-42	9.28066e-41
560	Hes1	16.948	2.96086	3.92405e-40	5.20074e-39
561	Fubp1	16.9335	2.08682	1.67671e-39	2.14227e-38
562	Dab2	16.9301	2.49469	4.71582e-43	7.51182e-42
563	Ccng1	16.922	0.748987	9.13666e-44	1.51779e-42
564	Stag1	16.9109	1.67585	2.70971e-39	3.40091e-38
565	Txn1	16.9054	0.971731	3.61908e-45	6.54815e-44
566	Gtf3c3	16.896	30.6284	1.06136e-39	1.36837e-38
567	Coq6	16.8663	30.3897	1.29784e-39	1.67072e-38
568	Pde7a	16.8661	1.96597	8.36791e-40	1.08376e-38
569	Chrne	16.8649	3.40987	2.89915e-44	4.95122e-43
570	Tmem109	16.8578	1.20998	3.79342e-42	5.76248e-41
571	Akirin1	16.8504	2.77419	8.17212e-39	9.89245e-38
572	Gripap1	16.8455	30.5178	1.49451e-39	1.92099e-38
573	2900026A02Rik	16.8372	30.5436	1.58022e-39	2.02505e-38
574	Sestd1	16.8369	30.6248	1.58353e-39	2.02625e-38
575	Plxnb2	16.8276	31.2121	1.68665e-39	2.15174e-38
576	Ddx17	16.8234	3.0011	2.58299e-41	3.70576e-40
577	Rab5a	16.8221	2.64348	1.57172e-39	2.0172e-38
578	Usp14	16.8127	0.892532	2.57234e-39	3.23804e-38
579	Slfn2	16.8094	31.3716	1.90796e-39	2.42681e-38
580	Tpt1-ps6	16.7956	30.0718	2.09517e-39	2.657e-38
581	Sh3pxd2a	16.7934	2.96352	2.31017e-40	3.11016e-39
582	Atp6v1g1	16.7895	0.554057	2.90899e-39	3.62964e-38
583	Hpcal1	16.7809	3.23127	5.6003e-43	8.88748e-42
584	Tnfrsf22	16.7764	30.5393	2.38761e-39	3.0144e-38
585	BC085271	16.7734	30.8641	2.4363e-39	3.07133e-38
586	Mcl1	16.7606	1.13665	5.9859e-40	7.8239e-39
587	Igf1r	16.7539	3.00487	3.04405e-42	4.65734e-41
588	Map1s	16.7292	2.01184	3.50911e-40	4.66531e-39
589	Obsl1	16.7208	30.7816	3.48189e-39	4.33178e-38
590	Dclk1	16.7186	31.2987	3.5331e-39	4.38908e-38
591	Tmem38a	16.7068	0.61122	1.81094e-37	1.93636e-36
592	Bod1	16.7017	0.813799	2.88598e-37	3.04762e-36
593	Palld	16.7013	3.02247	1.24632e-41	1.82181e-40
594	Sin3a	16.7013	2.95925	6.2294e-43	9.86746e-42
595	Cnot6	16.6921	30.9292	4.23047e-39	5.24775e-38
596	Dap	16.6859	31.0763	4.41268e-39	5.46582e-38
597	Yy1	16.6804	30.5828	4.58162e-39	5.66685e-38
598	Phip	16.6766	30.7935	4.70018e-39	5.80507e-38
599	Rassf4	16.6756	31.5689	4.73355e-39	5.83781e-38
600	Srsf5	16.6755	3.12323	1.4489e-42	2.25319e-41
601	1110059G10Rik	16.6657	3.02158	5.1897e-42	7.82772e-41
602	Thy1	16.6623	3.11217	3.88992e-41	5.48839e-40
603	Crebrf	16.6612	30.7402	5.21744e-39	6.42529e-38
604	Trim8	16.6508	3.2122	4.37219e-43	6.9775e-42
605	Dpt	16.6501	1.72041	1.87491e-41	2.71734e-40
606	Extl3	16.6413	2.97142	6.35639e-42	9.47013e-41
607	Lamp1	16.635	0.638249	4.3762e-42	6.6124e-41
608	Ddx39b	16.6189	1.45125	1.89042e-40	2.56941e-39
609	Coro1c	16.6166	3.28481	2.09179e-44	3.63059e-43
610	Rb1	16.6161	30.6924	7.09193e-39	8.60931e-38
611	Tia1	16.6152	2.92235	8.8273e-41	1.21725e-39
612	Mypn	16.5982	1.01128	2.31867e-38	2.68474e-37
613	Il11ra1	16.5938	1.11578	2.87357e-40	3.84436e-39
614	Med6	16.5575	30.5757	1.056e-38	1.26572e-37
615	Srrm1	16.5389	30.8546	1.19831e-38	1.43226e-37
616	Ctsd	16.5349	1.02898	1.44934e-43	2.37525e-42
617	Shprh	16.5247	30.6223	1.31995e-38	1.56666e-37
618	Emb	16.5229	31.2704	1.33691e-38	1.58458e-37
619	Gng5-ps	16.5197	29.8198	1.36566e-38	1.61641e-37
620	Smad5	16.5109	2.90801	2.97742e-42	4.57181e-41
621	Rbm28	16.5086	2.91935	5.47056e-38	6.1423e-37
622	Smc3	16.4867	1.14127	2.13231e-36	2.05793e-35
623	Snx4	16.4819	30.7118	1.76657e-38	2.08514e-37
624	Zmym4	16.4709	30.48	1.90375e-38	2.24085e-37
625	Lilrb4a	16.4681	30.6447	1.94028e-38	2.27755e-37
626	Gda	16.4607	30.8004	2.04133e-38	2.38305e-37
627	Pfdn6	16.4438	30.4452	2.29035e-38	2.65556e-37
628	Aldh1a1	16.44	0.720969	1.21103e-36	1.20005e-35
629	Gpr108	16.4353	30.5846	2.42699e-38	2.80255e-37
630	Tspo	16.4317	2.02859	1.72157e-39	2.19301e-38
631	Gdi2	16.428	1.0481	1.11257e-43	1.83391e-42
632	Wdr6	16.4235	30.4906	2.6288e-38	3.03148e-37
633	Rgma	16.4231	30.7623	2.63598e-38	3.03566e-37
634	Hsf2	16.4187	2.8446	6.05355e-41	8.38835e-40
635	Myog	16.4042	31.6575	2.99881e-38	3.44345e-37
636	Unc93b1	16.399	31.3259	3.10656e-38	3.55835e-37
637	Fgfr1	16.3976	2.90145	4.55515e-40	6.01844e-39
638	Ccnd1	16.3937	31.1637	3.22212e-38	3.68081e-37
639	Tmx3	16.3886	30.4597	3.33648e-38	3.80636e-37
640	Ift27	16.3784	30.5985	3.57661e-38	4.06399e-37
641	Clec16a	16.3716	30.1393	3.74462e-38	4.24922e-37
642	Plxnd1	16.3691	30.5834	3.80885e-38	4.31636e-37
643	Atxn7l3b	16.3636	3.08835	4.08499e-37	4.25578e-36
644	Cryz	16.3481	2.92374	1.53307e-40	2.10045e-39
645	Sh3pxd2b	16.3387	30.9979	4.68648e-38	5.28983e-37
646	Pkn1	16.3368	3.01258	6.26369e-42	9.34836e-41
647	Mrtfa	16.3322	30.4159	4.90045e-38	5.52403e-37
648	Des	16.329	0.463544	5.27374e-43	8.38485e-42
649	Fam129b	16.3256	31.0331	5.1235e-38	5.76022e-37
650	Cxcl14	16.3224	1.55522	1.16613e-37	1.27899e-36
651	Glt28d2	16.3167	2.95533	5.86762e-39	7.20517e-38
652	Prpf39	16.3109	2.95926	1.98079e-40	2.68794e-39
653	Cndp2	16.2952	3.18842	8.4651e-43	1.33345e-41
654	Sox4	16.2931	3.179	3.45978e-42	5.27446e-41
655	St13	16.2915	0.717759	6.43494e-39	7.87911e-38
656	Ssr2	16.2889	30.4068	6.58207e-38	7.34194e-37
657	Hsp90b1	16.2874	1.24456	2.02653e-38	2.37227e-37
658	Map3k12	16.2837	31.0941	6.81964e-38	7.59699e-37
659	Ddb1	16.2834	2.85645	1.67022e-36	1.62856e-35
660	Prpf38b	16.2788	30.8787	7.05324e-38	7.84696e-37
661	Fbxw7	16.2719	2.88849	4.60981e-41	6.47196e-40
662	Fyn	16.2537	3.03276	5.85899e-41	8.13198e-40
663	Mllt6	16.2463	2.94793	1.4704e-38	1.73796e-37
664	Mzt2	16.2446	30.2695	8.90647e-38	9.85727e-37
665	Clec4a1	16.2439	31.1095	8.95075e-38	9.89343e-37
666	Fam78a	16.2401	30.4039	9.18431e-38	1.01384e-36
667	Ecm2	16.2186	30.4154	1.06356e-37	1.16951e-36
668	Slc37a2	16.2117	31.2447	1.11505e-37	1.22454e-36
669	Tcf12	16.2048	2.94721	4.46275e-41	6.27584e-40
670	Ctla2a	16.2007	30.4372	1.20168e-37	1.31629e-36
671	Nup88	16.1855	30.3982	1.33289e-37	1.4544e-36
672	Ddr1	16.1743	30.9443	1.43934e-37	1.56855e-36
673	Cldn12	16.1734	30.3665	1.44818e-37	1.57617e-36
674	Gse1	16.1677	30.4492	1.50604e-37	1.63497e-36
675	Usp1	16.1637	2.80781	3.84975e-36	3.63318e-35
676	Vat1	16.1636	31.0432	1.54853e-37	1.67469e-36
677	Ythdc1	16.159	30.5722	1.59809e-37	1.72391e-36
678	Nacc2	16.159	1.32647	4.91461e-38	5.53267e-37
679	Rbm33	16.1584	30.5515	1.60408e-37	1.72819e-36
680	Gtf3c2	16.1582	2.99798	4.13127e-37	4.2935e-36
681	Serpinb1a	16.1504	30.819	1.69504e-37	1.82158e-36
682	Cited2	16.1476	30.9409	1.72752e-37	1.85414e-36
683	Ccl7	16.1434	30.9562	1.77711e-37	1.90497e-36
684	Fos	16.1392	30.529	1.82942e-37	1.95368e-36
685	Lasp1	16.1361	2.08061	2.2639e-41	3.27e-40
686	Pisd	16.1305	2.94426	3.3701e-41	4.77871e-40
687	Rhbdf1	16.1274	2.98398	5.7711e-40	7.56636e-39
688	Rrbp1	16.1232	2.25895	3.60406e-41	5.0935e-40
689	H3f3b	16.1181	1.57087	9.40089e-39	1.13316e-37
690	Leng8	16.1075	30.7193	2.2721e-37	2.42035e-36
691	Hnrnpc	16.1038	0.9705	2.14596e-42	3.30702e-41
692	Necap1	16.0905	30.3521	2.55234e-37	2.7121e-36
693	Frs2	16.087	30.3437	2.61333e-37	2.77345e-36
694	Arl6ip1	16.086	2.0733	6.84688e-40	8.92189e-39
695	Pea15a	16.085	1.36927	4.68442e-41	6.5659e-40
696	Adrb2	16.0818	30.2871	2.70902e-37	2.87143e-36
697	Cdon	16.0815	30.5259	2.71389e-37	2.87301e-36
698	Ctif	16.0812	30.5095	2.7187e-37	2.87454e-36
699	Plxdc2	16.0753	3.04218	1.63122e-40	2.2242e-39
700	Baz2b	16.0733	2.9337	7.53899e-37	7.67438e-36
701	Pias1	16.073	2.84519	8.52103e-38	9.45524e-37
702	Xbp1	16.0721	2.87131	2.11083e-38	2.45744e-37
703	Tbc1d22a	16.0696	2.90889	6.51433e-39	7.94208e-38
704	Golim4	16.0662	30.483	3.0138e-37	3.17811e-36
705	Slc39a7	16.066	30.1783	3.017e-37	3.17811e-36
706	Adamtsl5	16.0553	2.90884	2.71012e-40	3.63711e-39
707	Synj1	16.0336	30.6683	3.76487e-37	3.94155e-36
708	Cdh13	16.0328	1.20101	5.58695e-38	6.26474e-37
709	Eef2	16.0281	0.77822	5.95824e-40	7.79971e-39
710	Gnb2	16.026	30.7173	3.96683e-37	4.1479e-36
711	Rnf38	16.0243	30.5945	4.01234e-37	4.18521e-36
712	Trdn	16.0161	1.00049	2.82906e-41	4.05197e-40
713	Dpm2	16.0116	2.89492	1.65035e-37	1.77579e-36
714	Cap1	16.0039	30.8061	4.61326e-37	4.78275e-36
715	Macf1	16.0009	1.72206	1.1786e-36	1.172e-35
716	Aco2	15.9984	0.659923	3.59047e-41	5.08272e-40
717	Slc50a1	15.9973	30.3883	4.82671e-37	4.99796e-36
718	Igfn1	15.9912	30.3048	5.03275e-37	5.20499e-36
719	Suz12	15.9877	2.79896	1.32757e-37	1.45046e-36
720	B9d2	15.9818	30.3498	5.36724e-37	5.53748e-36
721	Chd8	15.9799	30.5735	5.43677e-37	5.60244e-36
722	Gadl1	15.9798	2.93183	7.29273e-40	9.47387e-39
723	Lix1l	15.978	30.5998	5.50822e-37	5.66921e-36
724	Atp13a2	15.9763	30.511	5.57362e-37	5.7296e-36
725	Pvr	15.9706	30.6699	5.79327e-37	5.93392e-36
726	Klhdc2	15.9702	0.719278	1.53854e-37	1.666e-36
727	Sdf4	15.9672	1.0909	1.81206e-35	1.59693e-34
728	Atp6v0a1	15.9629	1.93621	9.73044e-38	1.07135e-36
729	Pf4	15.9618	2.54258	1.51618e-41	2.2087e-40
730	Polr2a	15.9582	3.09238	1.59677e-37	1.72391e-36
731	Tacc1	15.956	2.89154	5.81122e-41	8.07883e-40
732	Rbpj	15.9435	1.26776	3.82649e-35	3.28392e-34
733	Pja1	15.9428	30.1453	7.01142e-37	7.15585e-36
734	Npdc1	15.9276	30.2717	7.77841e-37	7.90079e-36
735	Tra2b	15.9207	2.73073	1.03206e-38	1.23876e-37
736	Rlim	15.9177	2.88427	8.59877e-40	1.11028e-38
737	Ccnl2	15.9157	1.8611	6.03327e-39	7.39792e-38
738	Poglut1	15.9129	30.2459	8.60074e-37	8.70493e-36
739	Pclaf	15.9124	31.3652	8.62917e-37	8.72335e-36
740	Ganab	15.9083	1.55015	4.50326e-40	5.95913e-39
741	Cwc25	15.9067	2.95884	4.73705e-40	6.24909e-39
742	Tmem203	15.9024	30.0796	9.24212e-37	9.32087e-36
743	Ppp1r18	15.895	30.6813	9.72463e-37	9.79589e-36
744	Stoml1	15.8911	30.2152	9.98764e-37	1.00446e-35
745	Fbxo7	15.8832	30.2222	1.05428e-36	1.05825e-35
746	Ppfibp1	15.8789	30.5562	1.08538e-36	1.08691e-35
747	Chfr	15.8785	30.4717	1.0888e-36	1.08906e-35
748	Idnk	15.8782	30.4058	1.09073e-36	1.0897e-35
749	Ist1	15.8726	2.8655	2.17848e-38	2.53274e-37
750	Gtf3c1	15.867	30.301	1.17759e-36	1.172e-35
751	Slc38a9	15.8667	30.3142	1.18014e-36	1.17216e-35
752	Slc39a3	15.865	30.3277	1.19447e-36	1.18502e-35
753	Jph2	15.8523	1.00582	1.78514e-35	1.57484e-34
754	C1qtnf3	15.8495	30.9111	1.32822e-36	1.30856e-35
755	Depp1	15.8491	30.3544	1.33184e-36	1.31062e-35
756	Axl	15.8445	1.80661	1.25758e-38	1.4968e-37
757	Rabggtb	15.8329	1.04448	1.57977e-40	2.1575e-39
758	Tnrc6b	15.8228	2.92119	9.32814e-39	1.12598e-37
759	Pkd2	15.8198	30.3342	1.62747e-36	1.59051e-35
760	Cotl1	15.818	31.0451	1.64801e-36	1.60874e-35
761	Entpd2	15.8119	1.87553	3.32286e-37	3.49167e-36
762	Nolc1	15.8103	30.2765	1.73695e-36	1.68783e-35
763	Vwa5a	15.8088	30.5544	1.75568e-36	1.70409e-35
764	Get1	15.7881	30.1805	2.02334e-36	1.95719e-35
765	Kank2	15.7805	2.89166	3.13606e-37	3.29945e-36
766	Amotl1	15.7804	1.3123	4.94382e-36	4.61459e-35
767	Exoc1	15.7743	30.2176	2.22311e-36	2.14314e-35
768	Casc3	15.7641	30.331	2.38526e-36	2.29685e-35
769	Casz1	15.7563	2.85159	9.99513e-37	1.00446e-35
770	Tmem50a	15.7534	1.15852	4.70224e-41	6.56926e-40
771	Wdr1	15.7489	1.77031	1.26158e-38	1.49947e-37
772	Stard3	15.7394	30.3767	2.824e-36	2.70102e-35
773	Tmem184b	15.7386	30.3624	2.84063e-36	2.71389e-35
774	Ctsh	15.7373	31.034	2.86627e-36	2.73531e-35
775	Mylpf	15.7354	0.484359	6.75433e-37	6.90173e-36
776	Gm2a	15.7284	30.7649	3.04579e-36	2.90338e-35
777	Fbxo38	15.7277	30.2011	3.06134e-36	2.91495e-35
778	Ttn	15.7194	0.878788	5.67223e-37	5.82395e-36
779	Cbl	15.718	30.846	3.27088e-36	3.10752e-35
780	Impdh1	15.7132	30.2309	3.38092e-36	3.20492e-35
781	Sap30	15.7102	30.3626	3.45203e-36	3.26869e-35
782	Hnrnpr	15.7051	2.86907	4.39658e-38	4.97579e-37
783	Arid5b	15.7045	2.81157	2.77034e-39	3.46679e-38
784	Nfia	15.7033	2.84183	1.11524e-34	9.24525e-34
785	Nr2c2	15.6944	2.75344	8.01323e-38	8.90336e-37
786	Tada2b	15.6931	30.2852	3.88121e-36	3.65881e-35
787	Hspa2	15.6851	30.3197	4.10055e-36	3.85279e-35
788	Thap11	15.6836	29.9617	4.14304e-36	3.88844e-35
789	Pdgfa	15.6772	2.8589	5.64167e-36	5.20891e-35
790	Zfp703	15.6703	30.5797	4.53846e-36	4.25019e-35
791	Mif	15.666	0.733309	2.49752e-40	3.35708e-39
792	Ttc9	15.6649	30.3169	4.70928e-36	4.40532e-35
793	Clec7a	15.6621	30.8272	4.80099e-36	4.48618e-35
794	Acp2	15.6553	30.4358	5.03084e-36	4.69068e-35
795	Sh3rf2	15.6533	30.232	5.099e-36	4.74385e-35
796	1110051M20Rik	15.6507	30.0661	5.19139e-36	4.82454e-35
797	H2-D1	15.6505	1.79797	1.09729e-36	1.09497e-35
798	Prelp	15.6488	1.81813	1.5076e-34	1.2302e-33
799	Sap25	15.6449	30.4222	5.40428e-36	5.01145e-35
800	Gypc	15.6427	30.2431	5.48467e-36	5.08047e-35
801	Tgif1	15.6399	30.8327	5.59134e-36	5.16805e-35
802	Fkbp1a	15.6397	0.653723	8.41119e-40	1.08771e-38
803	Wfdc17	15.637	30.8015	5.70362e-36	5.26042e-35
804	Wiz	15.6364	30.2557	5.72691e-36	5.27602e-35
805	Rab8b	15.6363	30.9229	5.73292e-36	5.27602e-35
806	Zfp120	15.6331	30.3714	5.85922e-36	5.38644e-35
807	Surf4	15.6311	1.04613	8.49246e-37	8.60556e-36
808	2310022B05Rik	15.631	30.3748	5.94565e-36	5.46001e-35
809	Mgat4b	15.6292	30.2247	6.01945e-36	5.52183e-35
810	Npc2	15.6132	1.7713	2.87448e-39	3.59183e-38
811	Glg1	15.6093	30.6007	6.90027e-36	6.30945e-35
812	Nipsnap2	15.6061	0.68524	1.43282e-34	1.17183e-33
813	Fndc3b	15.6055	2.98615	5.06778e-40	6.66476e-39
814	Fem1c	15.6048	2.75718	1.09433e-35	9.86866e-35
815	Marcksl1	15.6042	31.0821	7.14482e-36	6.52606e-35
816	Slc25a17	15.5904	30.5425	7.85394e-36	7.16609e-35
817	Ipo8	15.5848	2.81971	1.21256e-38	1.44523e-37
818	Spp1	15.5791	31.7579	8.49076e-36	7.73885e-35
819	Gosr2	15.5776	30.1214	8.57826e-36	7.81025e-35
820	Il2rg	15.5771	3.48395	1.85135e-40	2.52032e-39
821	Fbxo11	15.5771	2.77919	7.5465e-37	7.67438e-36
822	Tmbim6	15.5737	0.822037	2.91182e-38	3.34879e-37
823	Yjefn3	15.5704	30.2388	9.01406e-36	8.19828e-35
824	Serp1	15.5699	3.01283	2.00475e-39	2.54612e-38
825	Nav2	15.5696	2.98914	3.00221e-38	3.44345e-37
826	Ift52	15.5694	30.52	9.07584e-36	8.24567e-35
827	Cd34	15.5684	2.80156	9.54708e-39	1.14916e-37
828	Luc7l	15.562	30.4179	9.54593e-36	8.66352e-35
829	Serpine1	15.5595	30.7884	9.71086e-36	8.80382e-35
830	Ehd3	15.5576	2.95403	8.15203e-39	9.88216e-38
831	Fdxacb1	15.5567	30.3401	9.9031e-36	8.96856e-35
832	Lcn2	15.5437	30.1423	1.08233e-35	9.78111e-35
833	Cpeb2	15.5421	30.0373	1.09423e-35	9.86866e-35
834	Stxbp4	15.5357	30.1409	1.14371e-35	1.03031e-34
835	Cyba	15.5291	2.38541	2.83189e-40	3.79456e-39
836	Tmem189	15.5259	30.5085	1.22376e-35	1.1001e-34
837	Tubb2b	15.5225	30.6741	1.2523e-35	1.12456e-34
838	Evi5	15.5221	30.122	1.25598e-35	1.12619e-34
839	Srebf1	15.522	30.1258	1.25676e-35	1.12619e-34
840	Otulinl	15.5213	31.1503	1.26223e-35	1.12991e-34
841	Actn4	15.5211	2.92064	6.54429e-39	7.9672e-38
842	Mga	15.5192	2.88561	2.22615e-38	2.58464e-37
843	Noc4l	15.5136	30.1608	1.3315e-35	1.18693e-34
844	Nsmce1	15.5097	2.76302	1.97598e-36	1.91356e-35
845	Gle1	15.5065	30.3002	1.398e-35	1.2449e-34
846	Ptpn1	15.5023	30.4825	1.43881e-35	1.27991e-34
847	Tnnc1	15.493	30.7834	1.53379e-35	1.36156e-34
848	Zrsr2	15.4904	30.4346	1.56127e-35	1.38307e-34
849	Sat1	15.4874	30.8362	1.59376e-35	1.41039e-34
850	Srsf1	15.4865	1.90684	1.04675e-33	7.88022e-33
851	Hoxc11	15.4817	30.0731	1.65745e-35	1.46371e-34
852	Cavin3	15.4736	2.97198	3.5676e-38	4.05944e-37
853	S100a11	15.4722	1.60991	6.45067e-39	7.88703e-38
854	Prkag3	15.4666	1.38836	1.72234e-34	1.39922e-33
855	Krit1	15.4647	30.2307	1.86281e-35	1.63997e-34
856	Pan3	15.4571	30.8475	1.96273e-35	1.72615e-34
857	Uba1	15.4553	0.6751	3.56785e-38	4.05944e-37
858	Gnl1	15.4547	30.2637	1.99601e-35	1.7518e-34
859	Helz	15.4488	2.87989	9.4531e-38	1.04216e-36
860	6430548M08Rik	15.4484	30.2838	2.08467e-35	1.82773e-34
861	Rfc2	15.445	2.80077	2.76682e-36	2.64931e-35
862	Srsf11	15.4444	1.50923	2.05387e-38	2.3944e-37
863	Kmt2b	15.4443	2.78875	3.14862e-36	2.9947e-35
864	Srek1	15.4435	2.83044	6.21395e-38	6.95864e-37
865	Ilk	15.4387	1.45209	1.93203e-36	1.87312e-35
866	Hoxa7	15.4379	30.1975	2.24054e-35	1.96036e-34
867	Nbdy	15.436	2.84374	1.1639e-36	1.16009e-35
868	Rnf20	15.4337	2.75963	2.85328e-35	2.4711e-34
869	Carns1	15.4333	1.77382	4.86976e-34	3.80386e-33
870	Mir22hg	15.431	30.5165	2.34854e-35	2.05064e-34
871	Tmem176b	15.4307	1.5887	6.49806e-39	7.93359e-38
872	Mvp	15.429	30.0716	2.38153e-35	2.07732e-34
873	Tgfbr1	15.4189	2.91882	1.57427e-36	1.54029e-35
874	Usp34	15.4116	0.924487	2.15342e-35	1.88607e-34
875	Hspa4l	15.4114	30.2719	2.6877e-35	2.3372e-34
876	Phlda1	15.4096	30.3207	2.72059e-35	2.3634e-34
877	Svep1	15.4058	30.3391	2.79365e-35	2.42439e-34
878	Trim25	15.4055	2.83713	1.32808e-36	1.30856e-35
879	Selenoo	15.4043	30.1604	2.82168e-35	2.44622e-34
880	Pnpla7	15.3978	30.165	2.95228e-35	2.55424e-34
881	Arf1	15.3929	0.660251	1.69463e-34	1.37802e-33
882	Arhgap24	15.3894	30.1341	3.12623e-35	2.69926e-34
883	Gpatch8	15.3888	30.3338	3.14039e-35	2.70875e-34
884	Thoc2	15.3851	2.94637	4.09912e-37	4.26529e-36
885	Sf3a1	15.3849	30.2821	3.22441e-35	2.7784e-34
886	Atxn2l	15.3807	3.08382	2.63521e-39	3.31228e-38
887	Tacc2	15.376	0.978874	2.29409e-35	2.00515e-34
888	Cyp2u1	15.3693	29.981	3.59095e-35	3.09112e-34
889	Clk4	15.3664	30.166	3.66191e-35	3.14902e-34
890	Flot1	15.3657	1.45513	2.91254e-33	2.08928e-32
891	Ranbp10	15.3655	30.1106	3.68653e-35	3.167e-34
892	Slc30a4	15.3587	2.77996	9.68136e-35	8.07286e-34
893	Trp53bp1	15.358	30.3507	3.88204e-35	3.32825e-34
894	Tram1	15.3551	1.45288	8.24175e-37	8.36145e-36
895	Irf2bpl	15.3521	2.84461	1.39336e-36	1.36642e-35
896	Atp2a1	15.3488	0.466509	7.19621e-37	7.33566e-36
897	Smc1a	15.3378	1.71503	1.04903e-35	9.49024e-35
898	Prelid1	15.3333	30.7792	4.60008e-35	3.92019e-34
899	Tomm34	15.3317	30.2472	4.65053e-35	3.95922e-34
900	Foxo3	15.3157	2.90213	1.98904e-38	2.33159e-37
901	Cstb	15.3136	2.31316	5.62695e-39	6.91961e-38
902	Tubgcp4	15.3135	30.0392	5.27174e-35	4.48361e-34
903	Nup85	15.3118	30.0273	5.33433e-35	4.53232e-34
904	Arhgdia	15.2998	1.93887	6.41691e-37	6.56481e-36
905	Pank2	15.2996	30.2301	5.80156e-35	4.9195e-34
906	Lin52	15.2984	29.9921	5.84813e-35	4.94913e-34
907	Rbm25	15.2691	1.66147	1.29103e-35	1.15326e-34
908	Sdc2	15.2652	30.39	7.35328e-35	6.19216e-34
909	Cops7b	15.2649	30.2433	7.36418e-35	6.19522e-34
910	Cmtm7	15.2633	2.90389	9.56147e-39	1.14926e-37
911	Adamts2	15.2618	30.3075	7.52365e-35	6.32313e-34
912	Cygb	15.2597	1.77857	1.70625e-36	1.65989e-35
913	Selenon	15.2587	3.04909	2.03961e-38	2.38305e-37
914	Ehmt2	15.2584	30.1584	7.70073e-35	6.45921e-34
915	Crkl	15.2524	30.2103	8.02941e-35	6.7225e-34
916	N4bp2	15.2524	30.0939	8.0304e-35	6.7225e-34
917	Ddt	15.2506	2.66926	4.27438e-34	3.35108e-33
918	Ap1s2	15.2471	1.36445	1.13871e-34	9.43056e-34
919	Sf1	15.2461	1.31748	3.78889e-34	2.99248e-33
920	Zfp26	15.2377	2.90391	4.19605e-37	4.35551e-36
921	Hmgn3	15.2369	30.2404	8.9323e-35	7.47017e-34
922	Col8a1	15.2352	30.6019	9.03447e-35	7.54821e-34
923	Map7d1	15.2308	1.26748	3.34667e-36	3.17598e-35
924	Col6a1	15.2281	1.76247	2.11399e-37	2.25474e-36
925	Lyn	15.2249	30.8492	9.69956e-35	8.08012e-34
926	Ap2a1	15.2248	2.79078	3.89305e-36	3.66592e-35
927	Usp2	15.2231	1.34659	5.84534e-35	4.94913e-34
928	Psat1	15.2221	30.8788	9.89037e-35	8.23103e-34
929	Nans	15.2217	30.3628	9.91731e-35	8.2454e-34
930	Mpp6	15.2211	30.0167	9.95994e-35	8.27277e-34
931	Pigm	15.2014	30.1705	1.14092e-34	9.43976e-34
932	Pip4k2b	15.2001	1.02675	1.53336e-37	1.66251e-36
933	Dus3l	15.1986	30.2479	1.16282e-34	9.61159e-34
934	Sema5a	15.1909	30.1506	1.22618e-34	1.01255e-33
935	Mfap5	15.1865	1.92956	1.48635e-37	1.61564e-36
936	Ddi2	15.1825	1.42866	5.09612e-36	4.74385e-35
937	Ldlr	15.1787	30.2585	1.33336e-34	1.09893e-33
938	Carhsp1	15.1774	30.313	1.34579e-34	1.1081e-33
939	Vrk3	15.1761	30.1182	1.35776e-34	1.11687e-33
940	Yap1	15.1756	2.82591	1.87425e-33	1.36633e-32
941	Txndc16	15.1746	30.0195	1.37241e-34	1.12675e-33
942	Cd93	15.1743	2.08379	1.50928e-36	1.4784e-35
943	C3ar1	15.174	30.8223	1.37781e-34	1.13009e-33
944	Slc7a8	15.1688	30.5263	1.42815e-34	1.16913e-33
945	E4f1	15.1663	29.9603	1.45255e-34	1.18683e-33
946	Sf3b3	15.1635	2.86058	5.6916e-37	5.8368e-36
947	Thyn1	15.1634	2.70989	2.41812e-36	2.32587e-35
948	Erlec1	15.1608	30.2144	1.50851e-34	1.2302e-33
949	Pi4ka	15.1488	30.0767	1.6389e-34	1.33398e-33
950	Pvalb	15.1434	0.515137	1.35869e-36	1.3355e-35
951	Serinc3	15.1391	0.791264	1.41075e-34	1.156e-33
952	Irgm2	15.1363	31.0891	1.78607e-34	1.44823e-33
953	Zer1	15.134	2.7899	1.33317e-34	1.09893e-33
954	Syt11	15.1327	30.0864	1.83153e-34	1.48368e-33
955	Pard3	15.1316	2.74385	1.21449e-35	1.09291e-34
956	Dbp	15.1307	1.83318	3.34367e-34	2.65314e-33
957	Tiparp	15.1275	30.1065	1.89807e-34	1.53612e-33
958	AI987944	15.1274	2.66649	4.57215e-35	3.90029e-34
959	Chchd5	15.1183	30.0341	2.02176e-34	1.63467e-33
960	Abca5	15.1179	30.1748	2.02751e-34	1.63777e-33
961	Crbn	15.117	29.8916	2.04064e-34	1.64681e-33
962	Cpne3	15.1161	30.1915	2.05375e-34	1.65583e-33
963	Odf2	15.1062	30.4228	2.19847e-34	1.76749e-33
964	Psmb5	15.1058	0.76184	9.07874e-35	7.57777e-34
965	Mindy3	15.1045	30.0585	2.22394e-34	1.78628e-33
966	Golga2	15.0994	30.1305	2.30295e-34	1.848e-33
967	Commd6	15.0983	30.0727	2.32051e-34	1.86034e-33
968	Reep5	15.092	0.893283	4.32309e-35	3.69152e-34
969	Atp6ap1	15.0906	1.22526	1.25592e-36	1.24308e-35
970	Tppp3	15.0904	1.33232	3.64777e-37	3.82365e-36
971	Ubn2	15.0882	2.81176	5.11261e-33	3.60378e-32
972	Emp3	15.0873	2.02782	1.2005e-38	1.43287e-37
973	Dennd1a	15.0801	29.8566	2.63208e-34	2.10418e-33
974	Msn	15.0748	1.74033	6.3475e-38	7.09458e-37
975	Tpm4	15.0746	1.7771	5.23869e-37	5.41141e-36
976	Slc39a13	15.0744	30.0685	2.73641e-34	2.17941e-33
977	Nfix	15.0694	0.897135	3.66802e-36	3.46551e-35
978	Pnn	15.0666	30.192	2.88735e-34	2.29534e-33
979	Cnot4	15.0538	30.1084	3.15534e-34	2.50604e-33
980	Tomm7	15.0531	0.611789	1.37111e-36	1.34615e-35
981	Snx6	15.0467	2.70882	2.61974e-36	2.5113e-35
982	Csnk1a1	15.0448	0.826129	4.4098e-36	4.13425e-35
983	Lgmn	15.0398	31.0294	3.47471e-34	2.75456e-33
984	Akap13	15.0385	2.81361	3.2386e-33	2.31733e-32
985	Nudcd3	15.0369	2.81702	3.24661e-31	2.04189e-30
986	Lama5	15.0344	30.1419	3.60644e-34	2.85633e-33
987	Zfp655	15.0323	30.0009	3.65749e-34	2.89407e-33
988	Midn	15.0316	30.9162	3.67538e-34	2.90552e-33
989	Actl6a	15.0247	30.2198	3.85464e-34	3.03878e-33
990	Gng12	15.0234	2.75887	1.61257e-35	1.42555e-34
991	Dbnl	15.023	30.4405	3.89979e-34	3.07154e-33
992	Minpp1	15.0194	30.1867	3.99928e-34	3.14408e-33
993	Cdk5	15.0103	30.1409	4.25753e-34	3.34095e-33
994	Nfat5	14.9969	2.84194	3.37735e-37	3.54456e-36
995	Psmd5	14.9932	29.9485	4.79013e-34	3.74509e-33
996	Slc4a1ap	14.9899	30.0356	4.90267e-34	3.82256e-33
997	Cecr2	14.9846	29.9904	5.08458e-34	3.95715e-33
998	Nsun4	14.9782	30.1046	5.31218e-34	4.12674e-33
999	Tubb4b	14.9743	1.02003	3.05226e-35	2.63807e-34
1000	Vwa7	14.9618	30.065	5.94889e-34	4.60877e-33
1001	Klhdc1	14.9601	29.9394	6.01925e-34	4.65904e-33
1002	Uba6	14.9541	30.1356	6.27311e-34	4.85113e-33
1003	Inpp5e	14.9529	29.9118	6.32681e-34	4.88822e-33
1004	Osmr	14.9493	30.2599	6.48724e-34	5.0031e-33
1005	Anapc1	14.9472	30.2668	6.58037e-34	5.06576e-33
1006	Ppia	14.9469	0.976403	2.47515e-37	2.63336e-36
1007	Sec31a	14.9446	1.46151	1.485e-32	1.01811e-31
1008	Gmfb	14.944	2.68636	2.68945e-34	2.14803e-33
1009	Spsb1	14.9428	30.3866	6.78448e-34	5.21817e-33
1010	Fus	14.9423	1.6583	5.27741e-36	4.89914e-35
1011	Mxd4	14.9422	2.84779	6.44912e-36	5.90326e-35
1012	Zfp422	14.942	30.1373	6.82173e-34	5.24209e-33
1013	Stk38	14.9394	1.83413	1.534e-34	1.24979e-33
1014	Cpsf6	14.9379	2.69883	1.31896e-35	1.17698e-34
1015	Akap9	14.9371	2.74832	2.13232e-32	1.44597e-31
1016	Tmem179b	14.9332	30.3626	7.24985e-34	5.55105e-33
1017	Egfr	14.9324	30.1121	7.28691e-34	5.57442e-33
1018	Nsa2	14.9293	0.912931	5.02083e-34	3.91111e-33
1019	Entpd5	14.9284	29.912	7.48931e-34	5.71899e-33
1020	Slc25a23	14.9281	30.0825	7.50968e-34	5.72941e-33
1021	Smpx	14.9274	0.598689	8.65159e-38	9.58762e-37
1022	Tmem263	14.9258	2.77384	3.46052e-36	3.27309e-35
1023	Stk17b	14.9233	30.1295	7.76228e-34	5.91683e-33
1024	Nedd4	14.9224	0.654943	1.37149e-34	1.12675e-33
1025	Col15a1	14.9215	1.84291	4.8895e-33	3.44937e-32
1026	Naa80	14.9212	30.051	7.87231e-34	5.99534e-33
1027	Ifnar2	14.9201	30.3653	7.93508e-34	6.03236e-33
1028	Rock1	14.9181	2.81005	2.1015e-36	2.0305e-35
1029	Gpalpp1	14.915	30.1293	8.21637e-34	6.24063e-33
1030	Pik3r4	14.9113	29.8527	8.42793e-34	6.39562e-33
1031	Pfkm	14.9105	0.455167	1.78093e-37	1.90667e-36
1032	Ttc14	14.9102	2.89804	1.68723e-36	1.64327e-35
1033	Hspb3	14.9095	1.45854	1.07195e-33	8.04861e-33
1034	Myo9a	14.9091	30.1131	8.55617e-34	6.48716e-33
1035	Naaa	14.9079	30.5508	8.62975e-34	6.53713e-33
1036	Taf3	14.9049	30.0366	8.81272e-34	6.66388e-33
1037	Scx	14.8996	29.9948	9.13832e-34	6.89785e-33
1038	Dctn4	14.899	2.69946	4.55943e-34	3.568e-33
1039	Bcam	14.8923	0.819032	2.5092e-36	2.40804e-35
1040	Folr2	14.8879	30.8152	9.90701e-34	7.46486e-33
1041	Ddx19a	14.8776	30.0741	1.06393e-33	8.00245e-33
1042	Bri3bp	14.8766	30.1975	1.07081e-33	8.0471e-33
1043	D2hgdh	14.8743	29.9329	1.08834e-33	8.15732e-33
1044	Acly	14.8663	30.1546	1.15019e-33	8.60576e-33
1045	Bag2	14.8633	29.9327	1.17402e-33	8.77628e-33
1046	Tspan5	14.853	30.179	1.26074e-33	9.39163e-33
1047	Tsc22d2	14.8527	30.0886	1.26352e-33	9.40412e-33
1048	Ttyh2	14.8504	30.5178	1.28318e-33	9.52003e-33
1049	Usp36	14.8504	30.0261	1.28356e-33	9.52003e-33
1050	Gga1	14.8488	30.0267	1.29794e-33	9.61833e-33
1051	St6galnac4	14.8375	30.1465	1.40342e-33	1.03729e-32
1052	Commd7	14.8347	30.0353	1.43038e-33	1.0563e-32
1053	Slc35b4	14.8299	30.3255	1.47849e-33	1.09088e-32
1054	Uckl1	14.8284	29.978	1.49372e-33	1.10021e-32
1055	Prpf31	14.8274	29.8732	1.5045e-33	1.1072e-32
1056	Creb3l1	14.823	30.3076	1.55071e-33	1.14022e-32
1057	Pelp1	14.8171	2.73901	2.45207e-35	2.13666e-34
1058	Ano8	14.8137	30.1881	1.65407e-33	1.21412e-32
1059	Trio	14.8103	29.89	1.69274e-33	1.24037e-32
1060	Ikzf5	14.8084	29.9853	1.7147e-33	1.25538e-32
1061	Prkag2	14.8081	29.9513	1.71875e-33	1.25727e-32
1062	Nup155	14.8065	2.8051	5.55868e-36	5.14344e-35
1063	Ttc17	14.8055	30.0073	1.74963e-33	1.27876e-32
1064	Eda2r	14.8045	1.57074	5.23229e-32	3.44587e-31
1065	Azin1	14.8006	2.77691	3.92668e-34	3.08986e-33
1066	Aif1	14.7968	30.5688	1.85861e-33	1.35609e-32
1067	Mast4	14.7929	1.352	1.07355e-30	6.60561e-30
1068	Kantr	14.7895	30.0701	1.95378e-33	1.42308e-32
1069	Tln2	14.788	2.78334	5.24942e-32	3.45448e-31
1070	Mbd3	14.7877	2.67388	3.97607e-35	3.40201e-34
1071	Reep3	14.7794	2.75749	2.68606e-35	2.3372e-34
1072	Cct6a	14.777	0.903296	6.56274e-35	5.53192e-34
1073	Arnt	14.776	30.1202	2.14513e-33	1.55847e-32
1074	Asb7	14.7744	30.0604	2.16853e-33	1.57413e-32
1075	Ppp4r1l-ps	14.7719	30.0584	2.20651e-33	1.59897e-32
1076	Tmem165	14.7713	30.3244	2.21649e-33	1.60484e-32
1077	Tex264	14.771	29.7713	2.22089e-33	1.60666e-32
1078	Zfp664	14.7675	29.973	2.27513e-33	1.6445e-32
1079	Aftph	14.7643	2.63409	7.06417e-34	5.4235e-33
1080	Rnps1	14.7633	0.825718	1.10915e-34	9.20369e-34
1081	Ciz1	14.7595	30.0596	2.40502e-33	1.73544e-32
1082	Bcas3	14.7507	2.68538	2.07446e-33	1.50841e-32
1083	Prkar1a	14.7439	1.40851	8.36692e-33	5.82064e-32
1084	Brpf3	14.7404	29.9454	2.74334e-33	1.97622e-32
1085	Mlh3	14.74	29.8695	2.75148e-33	1.98041e-32
1086	Pola2	14.7391	29.9828	2.76894e-33	1.9913e-32
1087	Pnpo	14.7381	29.9163	2.78721e-33	2.00275e-32
1088	Ube2i	14.7372	2.51657	7.47546e-33	5.22179e-32
1089	5031425E22Rik	14.732	29.8388	2.9069e-33	2.08699e-32
1090	Nln	14.7158	30.4165	3.2512e-33	2.32383e-32
1091	Zdhhc8	14.7157	30.1604	3.25314e-33	2.32383e-32
1092	Zfp326	14.7133	30.0539	3.30876e-33	2.35961e-32
1093	Btg2	14.7126	30.086	3.32427e-33	2.36868e-32
1094	Anxa2	14.709	2.17879	8.7962e-37	8.88166e-36
1095	Fau	14.7071	0.889961	3.97682e-37	4.15325e-36
1096	Pdxdc1	14.7044	2.70578	4.1121e-35	3.51487e-34
1097	Ddx46	14.6951	2.69105	2.35742e-32	1.59318e-31
1098	Nudcd1	14.6932	29.8997	3.80163e-33	2.7043e-32
1099	Iqgap2	14.6925	30.7382	3.82026e-33	2.71529e-32
1100	Ccn4	14.6854	30.5013	4.01059e-33	2.84818e-32
1101	Peg13	14.6851	29.7878	4.01841e-33	2.85137e-32
1102	Zfp281	14.6826	29.9749	4.08957e-33	2.89703e-32
1103	Fnip1	14.6814	2.64224	1.77374e-33	1.29527e-32
1104	Ltbp1	14.6811	2.78031	7.44808e-34	5.6926e-33
1105	Tubgcp2	14.6726	29.9592	4.38339e-33	3.10259e-32
1106	Epn2	14.6722	29.9218	4.39589e-33	3.10886e-32
1107	Idua	14.6704	29.8753	4.45078e-33	3.14507e-32
1108	Phtf2	14.6668	0.955905	2.17989e-32	1.47671e-31
1109	Mbtps1	14.6615	30.1978	4.7333e-33	3.34194e-32
1110	Tet3	14.6522	2.81921	5.13462e-34	3.99245e-33
1111	Wipf2	14.6516	2.7902	1.97918e-35	1.73882e-34
1112	Stat6	14.6338	29.9999	5.72953e-33	4.02863e-32
1113	Arhgap31	14.6308	30.2076	5.84855e-33	4.10893e-32
1114	Krba1	14.624	29.9913	6.13184e-33	4.30441e-32
1115	Dgcr2	14.6198	2.62435	5.9318e-34	4.59971e-33
1116	Kdm2a	14.6184	2.79061	3.90317e-35	3.343e-34
1117	Pnck	14.6072	29.8965	6.88587e-33	4.82975e-32
1118	Bcl2l11	14.6018	30.1075	7.14825e-33	5.00965e-32
1119	Phf1	14.5996	29.8425	7.25994e-33	5.07957e-32
1120	Huwe1	14.5986	2.81681	1.05949e-32	7.29912e-32
1121	Clk2	14.5973	30.0905	7.37241e-33	5.15403e-32
1122	Hoxa5	14.5934	29.9633	7.57816e-33	5.28487e-32
1123	Nisch	14.5835	1.79485	6.44824e-34	4.97752e-33
1124	Cpsf7	14.5833	30.1472	8.12146e-33	5.6545e-32
1125	Dhrs3	14.581	1.48625	2.72828e-33	1.96704e-32
1126	Src	14.5773	30.2709	8.46819e-33	5.88149e-32
1127	Fip1l1	14.5766	30.4416	8.50735e-33	5.90388e-32
1128	Pdcd6ip	14.5724	2.73267	2.46655e-34	1.97556e-33
1129	Lamtor1	14.5719	0.589147	4.01565e-36	3.77719e-35
1130	Apobec2	14.5679	0.573377	7.8869e-34	6.00108e-33
1131	Cbx1	14.5678	2.62606	4.16251e-34	3.26939e-33
1132	Med27	14.5648	29.9105	9.23133e-33	6.40109e-32
1133	Dnajc16	14.5619	29.6705	9.42112e-33	6.52244e-32
1134	Pds5b	14.5467	2.69001	2.13282e-32	1.44597e-31
1135	Zfp579	14.5391	29.9728	1.10305e-32	7.59304e-32
1136	Wdr11	14.5321	2.76109	1.39236e-33	1.03001e-32
1137	Ing1	14.5314	2.5733	1.21947e-31	7.84922e-31
1138	Capza2	14.5196	0.615991	2.17144e-34	1.74741e-33
1139	Spen	14.5187	2.7526	1.26537e-33	9.40963e-33
1140	Ltbr	14.5185	30.0203	1.27156e-32	8.74592e-32
1141	Klf6	14.5153	1.75044	3.27207e-33	2.33539e-32
1142	Mfap3	14.51	2.84105	5.88849e-35	4.97834e-34
1143	Ndrg2	14.5098	0.440425	1.53696e-35	1.36296e-34
1144	Lin7c	14.4989	2.73511	9.10755e-34	6.88072e-33
1145	5330406M23Rik	14.4968	30.0819	1.47703e-32	1.01429e-31
1146	Serf1	14.4965	30.0575	1.48033e-32	1.01573e-31
1147	Preb	14.4956	29.9418	1.48988e-32	1.02064e-31
1148	Rasip1	14.4926	30.0036	1.52066e-32	1.04089e-31
1149	Mtap	14.4899	1.62079	7.20207e-33	5.04322e-32
1150	Rnf214	14.4897	29.9021	1.55125e-32	1.06098e-31
1151	Grb2	14.4881	1.42746	1.99934e-32	1.35981e-31
1152	Hsp90ab1	14.4725	0.516728	1.73753e-34	1.41021e-33
1153	Brd4	14.4704	2.70746	3.12738e-33	2.23962e-32
1154	Zfp653	14.4656	29.9857	1.83282e-32	1.25154e-31
1155	Prrc2a	14.4643	2.80299	2.6166e-34	2.09377e-33
1156	Ccdc97	14.464	29.914	1.85401e-32	1.265e-31
1157	Dhx16	14.4627	29.8873	1.87093e-32	1.27553e-31
1158	Vps39	14.4609	29.7624	1.8942e-32	1.29036e-31
1159	Ssb	14.4592	1.19816	2.01734e-33	1.46813e-32
1160	Pfkfb1	14.457	29.7281	1.94513e-32	1.324e-31
1161	Fam50a	14.4554	1.66815	3.13916e-31	1.97869e-30
1162	Tapbp	14.4482	1.27672	1.27716e-35	1.14208e-34
1163	Mthfd1	14.4469	2.66346	8.70721e-34	6.58995e-33
1164	Slc29a1	14.4414	1.4697	4.9411e-32	3.26166e-31
1165	Slc43a2	14.4391	30.5525	2.20176e-32	1.49034e-31
1166	Gatad2a	14.4353	1.25523	3.66943e-33	2.61244e-32
1167	Top2a	14.434	30.7889	2.28132e-32	1.54297e-31
1168	Arf6	14.4333	1.62791	1.49065e-33	1.0989e-32
1169	Eif4g2	14.4307	0.584648	6.0773e-36	5.5689e-35
1170	En1	14.413	29.7968	2.63809e-32	1.77862e-31
1171	Cux1	14.4081	1.05795	7.02788e-31	4.35576e-30
1172	Hcfc1r1	14.404	0.721934	5.46519e-35	4.63888e-34
1173	Pum2	14.4031	0.640015	9.75946e-34	7.36019e-33
1174	Srxn1	14.4023	30.1012	2.84126e-32	1.91257e-31
1175	Nrbp2	14.3994	29.9755	2.89743e-32	1.94885e-31
1176	Otud1	14.3947	29.7068	2.9937e-32	2.01201e-31
1177	Itsn2	14.3929	29.986	3.03195e-32	2.03451e-31
1178	Gpr107	14.3924	2.65313	1.3142e-33	9.73034e-33
1179	Fer	14.3881	29.8949	3.13396e-32	2.10131e-31
1180	D030056L22Rik	14.3871	30.0085	3.15574e-32	2.11425e-31
1181	Septin11	14.3853	1.51916	3.40448e-32	2.27552e-31
1182	Taok3	14.3839	3.00744	1.50375e-35	1.33628e-34
1183	Tmem41a	14.3761	29.8703	3.40361e-32	2.27552e-31
1184	Uros	14.3733	29.7496	3.47233e-32	2.31906e-31
1185	Dtx4	14.3704	30.0698	3.54151e-32	2.36156e-31
1186	Acin1	14.3665	1.41946	6.01745e-35	5.08233e-34
1187	Nkapd1	14.3646	2.69109	7.81372e-33	5.44468e-32
1188	Kctd20	14.3591	30.1483	3.83019e-32	2.55007e-31
1189	Ddx18	14.3573	2.64252	9.28227e-32	5.99724e-31
1190	Klhl8	14.351	2.75	1.67466e-32	1.14446e-31
1191	Nub1	14.3471	2.68681	6.57608e-34	5.06576e-33
1192	M6pr	14.3469	29.9376	4.16648e-32	2.7718e-31
1193	Zbtb10	14.3455	29.7318	4.20817e-32	2.79735e-31
1194	H2-Q7	14.3434	30.039	4.26798e-32	2.83489e-31
1195	Ifih1	14.3424	29.9408	4.29895e-32	2.85324e-31
1196	Smarce1	14.3411	2.63073	5.19776e-33	3.66077e-32
1197	Cadm1	14.339	30.0615	4.40033e-32	2.91599e-31
1198	6330403L08Rik	14.3282	29.8042	4.74226e-32	3.14014e-31
1199	Thrsp	14.3271	29.9347	4.77906e-32	3.16205e-31
1200	Arhgef15	14.3246	29.8193	4.8621e-32	3.21449e-31
1201	Gspt1	14.3241	0.608769	7.1678e-34	5.49317e-33
1202	Kptn	14.3214	29.9383	4.97138e-32	3.27911e-31
1203	Fam193b	14.321	29.9213	4.98438e-32	3.28514e-31
1204	Ap3b1	14.3208	2.60799	1.0349e-31	6.66623e-31
1205	Gars	14.3189	0.879852	5.66508e-34	4.39688e-33
1206	Filip1l	14.3067	29.8225	5.50499e-32	3.61987e-31
1207	Vps35l	14.3025	29.6675	5.66411e-32	3.72163e-31
1208	Brpf1	14.3017	30.0664	5.69622e-32	3.73697e-31
1209	Birc2	14.2998	29.845	5.77215e-32	3.78387e-31
1210	Luc7l2	14.2952	1.50808	5.25112e-31	3.26881e-30
1211	Klhl20	14.2932	29.7921	6.04066e-32	3.9538e-31
1212	Ttyh3	14.2917	30.4773	6.10507e-32	3.99289e-31
1213	Zfp740	14.2908	29.8512	6.14567e-32	4.01637e-31
1214	Ankrd13c	14.2894	29.7912	6.20455e-32	4.05174e-31
1215	Elp1	14.2877	29.8054	6.27533e-32	4.09482e-31
1216	Pgap1	14.2765	29.9484	6.78068e-32	4.41781e-31
1217	Strbp	14.2744	29.876	6.88239e-32	4.48065e-31
1218	Nipbl	14.2682	2.72808	1.29612e-31	8.32997e-31
1219	Herc1	14.2674	2.68926	2.11739e-32	1.4378e-31
1220	Cpd	14.2586	1.48002	2.1524e-30	1.30646e-29
1221	Slc49a4	14.254	1.1206	8.51487e-32	5.52235e-31
1222	Txndc15	14.2522	29.8028	8.02389e-32	5.20789e-31
1223	Dusp3	14.245	0.935652	1.19161e-33	8.89997e-33
1224	A530013C23Rik	14.2409	29.7865	8.67774e-32	5.6237e-31
1225	Smg5	14.2403	29.6494	8.71672e-32	5.64467e-31
1226	P4hb	14.2367	1.32598	7.54696e-33	5.26742e-32
1227	Champ1	14.234	29.8581	9.10526e-32	5.88733e-31
1228	Tns1	14.2308	0.704929	1.73389e-31	1.10766e-30
1229	Mlxipl	14.2299	2.7739	9.42164e-33	6.52244e-32
1230	Ap2m1	14.2292	0.862271	2.49347e-32	1.68245e-31
1231	Oaz1	14.2266	0.507372	2.42557e-31	1.53685e-30
1232	Kcnu1	14.2249	30.1396	9.6934e-32	6.25338e-31
1233	Plcb4	14.2206	29.8141	9.98865e-32	6.43898e-31
1234	Cebpb	14.1964	2.84644	5.6275e-33	3.96016e-32
1235	Chd2	14.1915	2.79292	4.44646e-34	3.48279e-33
1236	Ifi203	14.1718	30.2491	1.40001e-31	8.99088e-31
1237	Nos3	14.1648	29.6467	1.46995e-31	9.43295e-31
1238	Fam219b	14.1515	30.1906	1.61185e-31	1.03235e-30
1239	2610002M06Rik	14.1469	29.6949	1.66334e-31	1.06419e-30
1240	Zdhhc7	14.1461	29.8545	1.67214e-31	1.06902e-30
1241	Ccdc86	14.1404	30.0218	1.73974e-31	1.11048e-30
1242	2610507B11Rik	14.1355	1.14818	1.04651e-32	7.21548e-32
1243	Ablim2	14.134	1.76258	3.71667e-30	2.23683e-29
1244	Arpc4	14.1281	1.5137	4.88085e-34	3.80903e-33
1245	Abi2	14.1249	29.7882	1.93775e-31	1.23512e-30
1246	Lysmd4	14.1224	29.8208	1.9709e-31	1.25531e-30
1247	Prkce	14.1212	29.8201	1.98737e-31	1.26485e-30
1248	Itih5	14.1155	1.97496	3.02062e-32	2.0285e-31
1249	Gmpr	14.1125	0.45583	7.04377e-32	4.58221e-31
1250	Wdr77	14.1114	2.65642	1.14867e-33	8.60194e-33
1251	Vasp	14.1085	2.77315	2.7096e-34	2.1621e-33
1252	Prkch	14.1077	29.7569	2.18283e-31	1.38718e-30
1253	Atp6v0c	14.1073	0.695962	1.25375e-33	9.34771e-33
1254	Ssh1	14.0941	2.73985	1.61856e-33	1.18908e-32
1255	Parva	14.0938	1.7207	5.68406e-32	3.73186e-31
1256	Focad	14.0934	29.5822	2.40876e-31	1.52734e-30
1257	Ppp1r9b	14.0916	1.77531	4.91511e-32	3.24702e-31
1258	Ranbp2	14.0884	2.63354	3.87753e-31	2.4351e-30
1259	Akt2	14.085	0.661412	4.17232e-30	2.50751e-29
1260	Hmgxb3	14.0788	29.7326	2.66601e-31	1.68544e-30
1261	Med19	14.0599	29.8723	3.03818e-31	1.91788e-30
1262	Trmt12	14.0592	29.7393	3.05262e-31	1.92557e-30
1263	Sdcbp	14.053	1.79711	4.04422e-33	2.86729e-32
1264	Arhgap12	14.0506	29.6086	3.24136e-31	2.04009e-30
1265	Rbx1	14.0471	0.73538	3.81744e-34	3.01224e-33
1266	Cyb5a	14.0448	1.29663	8.45238e-29	4.71717e-28
1267	Pgk1	14.0403	0.439304	5.00689e-31	3.12362e-30
1268	Pam	14.0397	1.84292	2.52956e-31	1.60072e-30
1269	Srp72	14.0377	2.55453	7.59438e-32	4.93287e-31
1270	Sfxn3	14.022	1.77971	2.37885e-32	1.60638e-31
1271	Nup205	14.0182	29.8476	4.05589e-31	2.54336e-30
1272	Map4k2	14.0164	29.7466	4.10602e-31	2.57291e-30
1273	Tmed9	14.0159	1.75483	1.58101e-31	1.01379e-30
1274	Nono	14.013	2.62421	1.42184e-30	8.71092e-30
1275	B4galt1	14.0008	2.70315	2.20645e-33	1.59897e-32
1276	Tmtc3	13.9903	29.9383	4.92115e-31	3.07463e-30
1277	H2-K1	13.9896	1.21593	3.51822e-32	2.34787e-31
1278	Arhgef40	13.9882	29.9672	4.99137e-31	3.11623e-30
1279	Plin2	13.9858	2.0632	2.80482e-34	2.23181e-33
1280	Cs	13.983	0.560257	3.02194e-33	2.16594e-32
1281	Gtf2h2	13.9811	29.8365	5.24328e-31	3.26632e-30
1282	Snhg20	13.9615	30.2346	6.00781e-31	3.73167e-30
1283	Cic	13.9613	2.78527	1.67618e-33	1.2293e-32
1284	Igip	13.9581	29.6656	6.14831e-31	3.81616e-30
1285	Hacd1	13.9551	0.681416	2.8131e-32	1.89512e-31
1286	Itgb1	13.9538	0.906416	1.00087e-32	6.91197e-32
1287	Fam168a	13.9409	2.58986	4.38284e-32	2.90666e-31
1288	Ctbp1	13.9252	0.832618	1.00071e-32	6.91197e-32
1289	Asap1	13.9216	2.83367	1.07374e-33	8.05493e-33
1290	Trappc2l	13.9177	1.08369	9.42132e-30	5.564e-29
1291	Map1a	13.9054	2.68701	2.10308e-31	1.3375e-30
1292	Timm13	13.9036	2.54469	3.16189e-30	1.90968e-29
1293	Capn6	13.892	30.2065	9.72195e-31	6.00801e-30
1294	Ano10	13.8897	29.714	9.87883e-31	6.10053e-30
1295	Tafa5	13.8853	29.814	1.01834e-30	6.27951e-30
1296	Rara	13.8846	2.72112	8.40859e-33	5.84486e-32
1297	Dgcr8	13.8838	29.7061	1.02845e-30	6.3373e-30
1298	Ythdf1	13.8808	0.996089	2.53217e-30	1.53261e-29
1299	Tnrc6a	13.8719	1.7999	1.40502e-30	8.61408e-30
1300	Fstl1	13.866	1.86447	7.07496e-34	5.4269e-33
1301	Rab2a	13.865	0.603694	6.00726e-32	3.93496e-31
1302	Pak2	13.8558	30.1025	1.2489e-30	7.679e-30
1303	Akr1a1	13.8534	1.04988	3.2078e-31	2.02047e-30
1304	Wac	13.8513	29.76	1.28875e-30	7.91265e-30
1305	Tsc22d3	13.8411	1.16234	3.81899e-29	2.17841e-28
1306	Gnai2	13.838	1.31518	1.25261e-33	9.34742e-33
1307	Cd164	13.8362	1.2363	2.48672e-28	1.35758e-27
1308	Lamp2	13.832	1.41294	1.00261e-32	6.9184e-32
1309	Trpm7	13.8277	29.5387	1.51723e-30	9.28866e-30
1310	Btbd10	13.8161	29.9345	1.6439e-30	1.00497e-29
1311	Klf2	13.814	2.64464	3.36166e-31	2.11269e-30
1312	Dcaf13	13.8101	2.68741	2.34528e-33	1.69377e-32
1313	Igsf10	13.7879	29.856	1.99905e-30	1.21859e-29
1314	Inppl1	13.7875	2.54298	7.60367e-31	4.70919e-30
1315	Tmem120b	13.7865	29.5759	2.01803e-30	1.22841e-29
1316	Airn	13.7786	29.7378	2.13206e-30	1.29504e-29
1317	Myh4	13.7779	0.596654	8.39456e-31	5.19524e-30
1318	Elp2	13.773	1.11518	8.41703e-29	4.7036e-28
1319	Mxra8	13.7647	29.8684	2.34841e-30	1.42443e-29
1320	1700120C14Rik	13.7627	0.922616	1.28264e-33	9.52003e-33
1321	Cish	13.7598	29.8076	2.42895e-30	1.47118e-29
1322	Synpo2l	13.7523	1.06266	3.30774e-32	2.21434e-31
1323	Klhl33	13.7514	1.5506	3.31376e-29	1.89402e-28
1324	Bcl9l	13.7513	2.6608	4.41503e-31	2.76247e-30
1325	Hs6st1	13.7421	2.58455	1.45266e-32	9.98353e-32
1326	Stx4a	13.7376	2.48135	1.00152e-29	5.90653e-29
1327	Rtn3	13.7254	1.29505	6.57629e-32	4.28792e-31
1328	Zfp560	13.7169	29.4021	3.26945e-30	1.97325e-29
1329	Tcof1	13.7159	2.57212	5.54986e-30	3.3051e-29
1330	Cand1	13.7138	29.8179	3.33939e-30	2.01403e-29
1331	Fbxo28	13.7038	2.65018	8.46735e-31	5.23649e-30
1332	Lpin1	13.6876	0.7522	7.42937e-32	4.82937e-31
1333	Klf7	13.6871	2.6242	1.61236e-31	1.03235e-30
1334	Wdr83os	13.6793	2.51166	5.11022e-31	3.18576e-30
1335	Mus81	13.6764	2.52267	1.28676e-30	7.90608e-30
1336	Mybpc2	13.6736	0.486972	5.29499e-30	3.16437e-29
1337	Ppp6r1	13.6718	2.62063	1.01474e-30	6.26185e-30
1338	Paics	13.6678	0.65237	8.56828e-29	4.7756e-28
1339	Anapc5	13.642	0.597165	1.71222e-30	1.04599e-29
1340	Cacfd1	13.6252	2.45944	6.5465e-30	3.88776e-29
1341	Mcmbp	13.6217	1.79323	1.1768e-29	6.91632e-29
1342	Cnot1	13.6159	1.47085	6.85063e-28	3.69033e-27
1343	Sypl2	13.6159	0.951519	6.69279e-29	3.76972e-28
1344	Vapa	13.6089	0.664266	2.78692e-30	1.6856e-29
1345	Cnpy3	13.6061	2.64482	3.66726e-32	2.4435e-31
1346	Ywhae	13.6053	0.537209	9.08479e-32	5.87856e-31
1347	Acot2	13.6051	29.6474	7.09176e-30	4.2057e-29
1348	Slc3a2	13.5948	1.46117	4.27033e-31	2.6739e-30
1349	Zrsr1	13.5901	29.6083	7.87079e-30	4.65798e-29
1350	U2surp	13.5895	1.23035	2.08149e-30	1.26613e-29
1351	Atp6v1h	13.5894	2.67465	2.90937e-31	1.83793e-30
1352	Mif-ps	13.5884	1.03094	4.06299e-30	2.44353e-29
1353	Rai14	13.588	29.6796	7.98725e-30	4.72362e-29
1354	Sf3a2	13.5829	2.66882	8.88246e-30	5.2494e-29
1355	Sugt1	13.5758	0.732574	1.48677e-29	8.69612e-29
1356	Rcbtb2	13.5749	2.59322	1.24854e-31	8.03024e-31
1357	Snapc3	13.5503	29.5516	1.03649e-29	6.10434e-29
1358	C1ra	13.54	2.48226	6.75242e-31	4.18807e-30
1359	Sqstm1	13.54	0.591043	4.83948e-30	2.90028e-29
1360	Pim3	13.5358	29.7949	1.14652e-29	6.74305e-29
1361	Toe1	13.5311	29.7286	1.18445e-29	6.9565e-29
1362	Os9	13.5291	1.86098	2.00288e-30	1.22005e-29
1363	Klf9	13.5162	1.13062	3.82008e-28	2.06959e-27
1364	Hspa13	13.514	2.56487	1.5164e-29	8.85119e-29
1365	Sptan1	13.5109	2.52065	1.23408e-29	7.24298e-29
1366	Ltbp3	13.507	1.66444	5.82955e-29	3.29221e-28
1367	Mafg	13.506	2.62401	8.91475e-28	4.77808e-27
1368	Lsmem1	13.4977	1.5871	2.09125e-29	1.21318e-28
1369	Psmc4	13.4932	1.01567	6.50979e-30	3.86865e-29
1370	Tspan17	13.4888	29.789	1.58716e-29	9.24526e-29
1371	Ercc2	13.4873	29.4632	1.60385e-29	9.33606e-29
1372	Trim35	13.4853	0.881385	1.29127e-29	7.56825e-29
1373	Emc8	13.4659	2.61871	4.39295e-30	2.63825e-29
1374	Lama4	13.4588	29.6922	1.9542e-29	1.13522e-28
1375	Eif2b4	13.4485	0.817441	1.05333e-28	5.82508e-28
1376	Phldb2	13.443	29.7379	2.18031e-29	1.26141e-28
1377	Fcrls	13.4415	30.1151	2.20278e-29	1.27355e-28
1378	Plekhm3	13.432	29.7671	2.35329e-29	1.3578e-28
1379	Ldlrad3	13.4231	29.8378	2.50276e-29	1.44112e-28
1380	Tmpo	13.4212	1.38869	2.3373e-29	1.34949e-28
1381	Aldh2	13.4209	1.27031	1.81924e-30	1.10977e-29
1382	H1f0	13.4177	0.876466	9.55541e-32	6.16903e-31
1383	H19	13.4061	1.14812	2.11004e-32	1.43396e-31
1384	Rarg	13.4015	2.56151	6.85645e-30	4.06899e-29
1385	Birc6	13.4008	2.45185	1.50721e-29	8.80358e-29
1386	Plcl1	13.397	29.6325	2.99825e-29	1.72061e-28
1387	Cc2d2a	13.3947	29.5128	3.04609e-29	1.74689e-28
1388	Klf4	13.3942	29.4324	3.05731e-29	1.75215e-28
1389	Hba-a2	13.3903	1.72641	5.82904e-29	3.29221e-28
1390	Rras2	13.3884	2.43521	2.93186e-29	1.68365e-28
1391	Prmt1	13.3812	1.02474	3.50664e-30	2.11341e-29
1392	Mfap1a	13.3781	2.44859	3.51107e-30	2.11458e-29
1393	Pip4p2	13.3627	2.50105	2.84682e-30	1.72061e-29
1394	Xpnpep3	13.3609	29.6332	3.85163e-29	2.19556e-28
1395	Inha	13.3587	29.5091	3.90834e-29	2.2264e-28
1396	Nelfcd	13.3558	2.65094	2.35521e-31	1.4945e-30
1397	Mmrn2	13.3496	1.39755	1.25332e-27	6.66302e-27
1398	Zswim8	13.3479	29.7326	4.21395e-29	2.39728e-28
1399	Slc15a2	13.3429	29.6595	4.36037e-29	2.47727e-28
1400	Tcf4	13.3298	1.43526	5.74436e-30	3.41854e-29
1401	Ank1	13.3208	0.528761	5.89248e-29	3.32555e-28
1402	Mtch1	13.315	1.06366	5.51354e-30	3.28576e-29
1403	Rbms1	13.3038	1.14048	1.38323e-30	8.48657e-30
1404	Plec	13.2937	0.895754	1.72314e-28	9.44955e-28
1405	Entpd1	13.2872	29.6975	6.41715e-29	3.61686e-28
1406	Tm9sf2	13.278	0.989722	6.64928e-28	3.58413e-27
1407	Akap12	13.2718	2.72078	5.63224e-31	3.5035e-30
1408	Ip6k2	13.2673	29.4346	7.36229e-29	4.13044e-28
1409	Atox1	13.2622	1.13561	1.5405e-29	8.98575e-29
1410	Srpk2	13.2526	2.47519	1.56488e-29	9.1217e-29
1411	Mbnl1	13.2506	0.757732	3.67485e-29	2.0976e-28
1412	Spats2	13.2447	29.6436	8.60956e-29	4.79547e-28
1413	Fcgr2b	13.2423	30.4242	8.7554e-29	4.87351e-28
1414	Twsg1	13.2392	29.5444	8.94499e-29	4.97255e-28
1415	Copz1	13.2332	0.928321	1.3968e-29	8.1811e-29
1416	Atxn10	13.2319	1.51394	4.68064e-29	2.65569e-28
1417	Zfp354a	13.2228	29.5186	1.00178e-28	5.55442e-28
1418	Ncs1	13.2135	29.4481	1.0686e-28	5.90574e-28
1419	Clasp2	13.2117	2.45962	4.89643e-29	2.77258e-28
1420	Cdc23	13.2103	2.51318	2.14122e-29	1.23964e-28
1421	Aldh7a1	13.2095	2.44812	3.60984e-29	2.06186e-28
1422	Ywhaz	13.2067	1.29169	2.44667e-29	1.41072e-28
1423	Ganc	13.1918	2.40113	1.35211e-28	7.44838e-28
1424	Aida	13.1851	1.61173	5.45735e-29	3.08815e-28
1425	Nop9	13.1774	2.52947	1.49591e-29	8.74358e-29
1426	Zfp963	13.1637	29.5592	1.50909e-28	8.29174e-28
1427	Tbca	13.1628	0.823875	1.74091e-31	1.11048e-30
1428	Zfp871	13.1574	1.59665	9.02812e-28	4.83277e-27
1429	Zmat2	13.1504	0.899446	4.13676e-27	2.15881e-26
1430	Wnk1	13.145	1.01581	3.2611e-29	1.86768e-28
1431	Hps5	13.1382	2.64661	1.04622e-28	5.78956e-28
1432	Tpi1	13.1375	0.413707	7.19775e-30	4.26559e-29
1433	Pdpn	13.132	30.3174	1.87886e-28	1.02969e-27
1434	Rab9	13.1316	2.49274	2.47351e-29	1.42524e-28
1435	Virma	13.1226	2.58726	1.53861e-30	9.4128e-30
1436	Hacd3	13.122	2.47662	5.42781e-30	3.23694e-29
1437	Hspa5	13.1196	1.05478	2.24339e-29	1.29615e-28
1438	Rpn2	13.1156	1.64882	8.23595e-29	4.60543e-28
1439	Nup50	13.1129	2.49834	2.74714e-29	1.57864e-28
1440	G3bp1	13.1122	0.999651	1.38246e-27	7.33584e-27
1441	Maoa	13.1089	1.81709	2.00229e-29	1.16237e-28
1442	Rgl2	13.1028	29.5562	2.29932e-28	1.25688e-27
1443	Vcpip1	13.1008	2.497	6.31381e-30	3.7548e-29
1444	Aco1	13.0929	29.7867	2.46333e-28	1.34567e-27
1445	Alkbh6	13.0871	29.3964	2.56405e-28	1.3989e-27
1446	Kmt2d	13.0784	2.60118	1.03166e-29	6.0801e-29
1447	Ddit4l	13.076	0.566596	7.15268e-29	4.01814e-28
1448	Wdr5	13.0694	2.48398	1.25623e-29	7.36793e-29
1449	Acadsb	13.0688	0.932582	3.27012e-27	1.70865e-26
1450	Golgb1	13.0613	1.30843	4.56004e-28	2.46891e-27
1451	Rapgef1	13.0584	0.783207	1.19604e-28	6.59292e-28
1452	Eid1	13.0575	1.11354	4.75688e-29	2.69536e-28
1453	Coprs	13.0566	29.5989	3.16617e-28	1.723e-27
1454	Fxr1	13.0552	0.609417	4.0413e-31	2.53608e-30
1455	Fech	13.0547	0.503153	5.67449e-31	3.52721e-30
1456	Sphk2	13.0524	2.51742	5.07995e-30	3.04012e-29
1457	Sobp	13.0483	1.37532	9.54829e-28	5.1016e-27
1458	Arfip1	13.0405	1.49424	1.24218e-26	6.34264e-26
1459	Marcks	13.018	1.67592	2.65839e-29	1.5297e-28
1460	Mta1	13.0148	2.41559	4.73719e-28	2.5632e-27
1461	Ik	13.0059	1.07973	2.38464e-27	1.25289e-26
1462	Purb	12.9992	1.03601	7.35237e-29	4.12759e-28
1463	Mecp2	12.9972	2.4954	3.99292e-29	2.27306e-28
1464	Tmem9b	12.9944	1.20444	7.65523e-28	4.12116e-27
1465	Fry	12.993	2.44915	3.78998e-28	2.0546e-27
1466	Anp32e	12.9899	0.979754	9.27027e-29	5.15002e-28
1467	Tmem176a	12.9835	1.69083	1.13736e-29	6.69375e-29
1468	Taok2	12.982	1.87916	9.67662e-29	5.37226e-28
1469	Eif3d	12.9814	1.30498	3.59957e-28	1.95261e-27
1470	Crhr2	12.9752	29.3686	5.5623e-28	3.00583e-27
1471	Mrps21	12.9703	0.567858	5.19497e-30	3.10678e-29
1472	Asb15	12.9652	2.48855	2.278e-28	1.24603e-27
1473	Septin8	12.9648	1.83377	3.27109e-29	1.87162e-28
1474	Nxf1	12.9553	1.68663	1.6333e-27	8.63462e-27
1475	Ctnna1	12.9421	1.40369	1.17804e-28	6.50211e-28
1476	Rnase4	12.9346	1.2456	2.68346e-29	1.54308e-28
1477	Stim2	12.9195	2.40033	7.99721e-29	4.48075e-28
1478	1810058I24Rik	12.9185	0.997988	7.73938e-30	4.58339e-29
1479	Calu	12.9125	1.20479	5.42156e-30	3.23547e-29
1480	Hnrnpa0	12.9093	1.80391	3.27236e-29	1.87162e-28
1481	Slc6a9	12.9084	29.6592	8.8273e-28	4.73419e-27
1482	Sel1l	12.9054	1.40433	3.50013e-28	1.90109e-27
1483	Bahcc1	12.9041	29.5392	9.09427e-28	4.86512e-27
1484	Vdac2	12.899	0.507357	8.44128e-29	4.71406e-28
1485	Arpc2	12.8973	1.04683	1.02053e-28	5.65105e-28
1486	Stk4	12.8931	2.52701	8.48274e-29	4.73102e-28
1487	Cct2	12.8911	1.07311	1.02573e-27	5.47014e-27
1488	Jkamp	12.8851	1.25327	7.70669e-29	4.32082e-28
1489	Dcaf12	12.8759	1.25824	4.88822e-27	2.54319e-26
1490	Abcc5	12.873	1.72935	1.01036e-28	5.59836e-28
1491	Lrrc47	12.8676	2.47746	3.42468e-28	1.8613e-27
1492	Khsrp	12.8605	1.70935	7.06344e-29	3.97062e-28
1493	Hnrnpab	12.8538	0.978945	1.59868e-28	8.77266e-28
1494	Aldh3a2	12.8228	29.4075	1.59647e-27	8.44513e-27
1495	Pcolce	12.8225	1.60658	1.82699e-29	1.06277e-28
1496	App	12.8179	1.34431	1.18041e-28	6.51098e-28
1497	Atpaf2	12.8075	29.3224	1.77402e-27	9.36693e-27
1498	Prdx1	12.807	0.479037	5.3417e-30	3.19004e-29
1499	Zfc3h1	12.8006	29.5002	1.86086e-27	9.81936e-27
1500	Mat2a	12.7986	1.20509	2.03643e-27	1.07126e-26
1501	Eif4e	12.7986	0.709196	8.12697e-29	4.55046e-28
1502	Tshz2	12.7979	2.55076	1.40902e-29	8.247e-29
1503	Spock2	12.7961	29.5336	1.91928e-27	1.01151e-26
1504	Mfsd1	12.7941	1.77177	8.15851e-29	4.56512e-28
1505	Rhoa	12.7927	1.02897	3.53617e-28	1.91944e-27
1506	Pbrm1	12.7897	2.42308	5.84648e-27	3.0288e-26
1507	Mrfap1	12.7778	0.531497	1.935e-29	1.12484e-28
1508	Bicc1	12.7776	1.55632	2.03923e-28	1.11686e-27
1509	Glyr1	12.7736	1.03476	2.10002e-29	1.21661e-28
1510	Txnip	12.7686	1.03913	4.30143e-29	2.44542e-28
1511	Atp2b4	12.7641	29.5693	2.39542e-27	1.25701e-26
1512	Mpv17l2	12.7637	2.39549	1.05258e-27	5.60982e-27
1513	Arl6ip5	12.7628	1.44888	4.74285e-28	2.56463e-27
1514	Atp5k	12.7623	0.565164	4.46086e-30	2.67714e-29
1515	Pmepa1	12.7599	1.50551	1.55312e-26	7.90188e-26
1516	Camk2b	12.7572	1.10174	5.55781e-27	2.88276e-26
1517	Ppfia1	12.7514	2.38776	2.69963e-28	1.47193e-27
1518	Cfp	12.7512	30.4562	2.61777e-27	1.37284e-26
1519	Zfp229	12.7508	29.2338	2.6261e-27	1.37636e-26
1520	Sox13	12.7409	29.3316	2.81182e-27	1.47279e-26
1521	Puf60	12.7405	0.652774	5.93731e-29	3.34862e-28
1522	Hdac4	12.7277	1.52258	2.4241e-26	1.226e-25
1523	Mindy1	12.7271	1.12955	8.02106e-28	4.31537e-27
1524	Atp1a1	12.725	1.62955	4.68431e-29	2.656e-28
1525	Mtdh	12.7026	0.85718	2.15086e-26	1.08975e-25
1526	Anxa6	12.7018	0.625062	6.99937e-29	3.9372e-28
1527	Laptm4a	12.6832	0.529599	1.37456e-28	7.56718e-28
1528	BC031181	12.6567	0.954299	1.54573e-25	7.59232e-25
1529	Foxn2	12.6467	29.2386	5.38936e-27	2.79708e-26
1530	Ndufa12-ps	12.6323	0.51572	4.5505e-29	2.58357e-28
1531	Pank1	12.6252	2.42018	2.8825e-28	1.57063e-27
1532	Ski	12.6184	1.25138	9.81455e-28	5.24058e-27
1533	Actn3	12.6111	0.525481	2.16491e-25	1.05485e-24
1534	Actr2	12.5968	2.4386	1.1672e-27	6.21293e-27
1535	Calm1	12.5907	0.687631	5.62498e-29	3.1809e-28
1536	Atg12	12.5895	2.39354	6.53692e-28	3.5258e-27
1537	Tnni1	12.5877	30.1168	8.10238e-27	4.17969e-26
1538	Dnajb9	12.5876	1.32388	1.22794e-26	6.27505e-26
1539	Ifitm3	12.5846	1.03299	2.09591e-29	1.21506e-28
1540	Colgalt1	12.5824	1.29707	1.44897e-27	7.67918e-27
1541	Cfdp1	12.5759	2.4575	7.33469e-27	3.79055e-26
1542	Dlc1	12.5696	2.5173	1.47994e-28	8.13678e-28
1543	Pdlim7	12.563	0.498276	1.22537e-27	6.51847e-27
1544	Nsrp1	12.5508	2.58262	1.12682e-28	6.22345e-28
1545	Uqcr11	12.5399	0.490923	8.78234e-28	4.71304e-27
1546	Nedd4l	12.5308	2.49211	8.52678e-28	4.58167e-27
1547	Pmf1	12.5173	0.962801	1.52791e-28	8.38975e-28
1548	Rpusd2	12.5098	29.632	1.3872e-26	7.06616e-26
1549	Anxa7	12.5051	1.33414	1.82672e-26	9.26625e-26
1550	Igfbp4	12.4946	1.25329	4.96041e-27	2.5776e-26
1551	Emc3	12.4898	2.35898	1.77662e-26	9.02284e-26
1552	Coa7	12.4772	2.41066	7.847e-26	3.89925e-25
1553	Casq2	12.4623	1.65623	6.31088e-28	3.4082e-27
1554	Anks1	12.4613	2.371	8.3047e-27	4.2763e-26
1555	Ano6	12.4609	1.52438	1.31506e-26	6.70672e-26
1556	Rbm42	12.4408	2.23875	6.01632e-25	2.8804e-24
1557	Plrg1	12.4388	1.18431	1.17275e-26	6.00251e-26
1558	Nmt1	12.437	2.42287	1.22821e-26	6.27505e-26
1559	Pbxip1	12.436	0.888287	8.78253e-27	4.51961e-26
1560	Lbr	12.4357	1.09752	4.97015e-26	2.48858e-25
1561	Pkm	12.4284	0.442549	7.72012e-27	3.98732e-26
1562	Rac1	12.4266	0.627201	8.71259e-28	4.67856e-27
1563	Znhit6	12.4169	2.40054	1.28028e-27	6.80208e-27
1564	Tef	12.4052	0.976406	1.8037e-25	8.82382e-25
1565	Col6a6	12.4016	29.2819	2.92832e-26	1.47751e-25
1566	Prkab2	12.3976	0.799106	8.78984e-27	4.52064e-26
1567	Mapre3	12.3959	0.733924	1.02666e-25	5.07492e-25
1568	Msmo1	12.3933	1.78251	6.38562e-27	3.30609e-26
1569	Obscn	12.3922	0.741167	4.25567e-26	2.13585e-25
1570	Grina	12.3786	1.09279	1.96844e-25	9.60218e-25
1571	Ksr1	12.3606	2.39982	6.426e-27	3.32498e-26
1572	Eif5	12.3565	0.786757	8.13794e-25	3.88089e-24
1573	Htra3	12.3549	1.48895	1.04192e-26	5.34894e-26
1574	Repin1	12.3309	2.43078	4.70943e-26	2.36081e-25
1575	Fxyd6	12.3265	1.5626	4.99259e-26	2.49835e-25
1576	Grcc10	12.3219	0.702185	9.15563e-28	4.89487e-27
1577	Ampd1	12.3164	0.493243	4.92443e-26	2.46714e-25
1578	Cflar	12.3118	1.48137	6.93793e-26	3.45559e-25
1579	Dnmt3a	12.3089	1.35609	9.17674e-26	4.54675e-25
1580	Cavin4	12.3038	1.04855	3.02405e-26	1.52401e-25
1581	Bap1	12.2831	2.34406	1.00804e-25	4.98578e-25
1582	Mapk3	12.2796	1.40743	1.78714e-26	9.0709e-26
1583	Ncdn	12.2793	2.46804	3.58114e-27	1.87e-26
1584	Xrcc2	12.274	29.3283	7.05342e-26	3.51105e-25
1585	Tgm2	12.2733	0.966856	8.29699e-27	4.27491e-26
1586	Inpp5k	12.2644	2.33916	7.99761e-26	3.97177e-25
1587	Ubr4	12.2644	0.922187	5.62487e-26	2.80815e-25
1588	Elk3	12.2638	2.45916	1.39273e-27	7.38573e-27
1589	Cd47	12.262	1.80918	1.55071e-27	8.20818e-27
1590	Selenof	12.2561	0.729443	1.75654e-27	9.28035e-27
1591	Kifap3	12.2556	1.34926	1.50944e-26	7.68426e-26
1592	Srsf3	12.2528	0.973164	8.1762e-28	4.39606e-27
1593	Slc6a6	12.2492	1.48392	5.2016e-26	2.60141e-25
1594	Atl2	12.2472	0.639692	5.75608e-25	2.75735e-24
1595	Jarid2	12.2453	1.5426	5.20575e-26	2.60196e-25
1596	Sptlc1	12.2449	2.42674	1.58805e-26	8.07478e-26
1597	Chac1	12.2449	1.78624	1.96732e-27	1.03555e-26
1598	Hook3	12.2448	1.18007	8.32743e-26	4.13316e-25
1599	Pttg1ip	12.2372	1.55637	4.46866e-27	2.32774e-26
1600	Cdc73	12.2319	1.16068	3.55945e-25	1.7157e-24
1601	Psmg2	12.2212	1.25652	2.95105e-24	1.38332e-23
1602	Msl2	12.2167	2.42777	2.61263e-26	1.32057e-25
1603	Limch1	12.2121	1.30762	3.15442e-26	1.58877e-25
1604	Klhl31	12.2034	0.469058	3.26333e-27	1.70614e-26
1605	Sctr	12.189	29.2818	1.26743e-25	6.24697e-25
1606	Tlk2	12.1885	0.901195	1.18999e-25	5.86867e-25
1607	Ctnnd1	12.1756	1.3511	2.31114e-25	1.12417e-24
1608	Set	12.1752	0.995569	5.75934e-27	2.98547e-26
1609	Rab24	12.1653	2.30138	3.44987e-25	1.66665e-24
1610	Psmb4	12.1646	0.632774	1.10768e-25	5.46908e-25
1611	Cct8	12.1602	0.704207	2.29932e-27	1.20881e-26
1612	Mkln1	12.1586	1.21557	1.76892e-24	8.3609e-24
1613	Snrk	12.1559	2.31277	4.91161e-27	2.5538e-26
1614	Hmgn1	12.1545	1.22583	9.75996e-27	5.01655e-26
1615	Psmg3	12.1453	28.9921	1.71188e-25	8.38908e-25
1616	Dmac1	12.1432	2.36687	9.04109e-26	4.48476e-25
1617	Mrpl33	12.1403	0.642558	3.13839e-27	1.64183e-26
1618	Atp2a2	12.139	1.51067	1.92563e-27	1.01423e-26
1619	Lamb2	12.1321	1.10122	3.46776e-26	1.74453e-25
1620	Clptm1	12.1259	0.82799	1.10255e-25	5.44689e-25
1621	Idh1	12.1229	1.76479	7.74977e-26	3.85318e-25
1622	Adprh	12.1183	1.08046	4.53139e-26	2.2729e-25
1623	Bcl7b	12.1183	2.33975	5.38645e-25	2.58319e-24
1624	Rack1	12.1175	0.560403	1.02209e-27	5.45411e-27
1625	Nrbp1	12.1148	1.06251	3.43765e-26	1.7304e-25
1626	Abcc1	12.0964	2.40204	1.10625e-26	5.67236e-26
1627	Irf2	12.0948	2.46502	8.01982e-27	4.13961e-26
1628	Park7	12.092	0.608124	1.30433e-27	6.92556e-27
1629	Thoc5	12.0913	2.35989	6.14353e-26	3.06529e-25
1630	Lbh	12.0829	2.52074	1.29019e-26	6.58382e-26
1631	Stim1	12.0807	0.972531	1.19934e-26	6.13492e-26
1632	Dnm1	12.0778	29.3194	2.72382e-25	1.32114e-24
1633	Pdia6	12.0666	1.62421	5.52097e-26	2.7579e-25
1634	Clta	12.0596	1.16698	6.6476e-26	3.31485e-25
1635	Myod1	12.0554	1.86473	2.36251e-25	1.14851e-24
1636	Ccnd2	12.0507	1.42129	1.14528e-25	5.65145e-25
1637	Srfbp1	12.0493	29.1736	3.31388e-25	1.60278e-24
1638	Cul1	12.0486	1.21172	8.44079e-24	3.90301e-23
1639	Ncor2	12.0447	2.36306	3.49982e-26	1.75961e-25
1640	Dysf	12.0299	1.30408	3.49618e-25	1.68711e-24
1641	Zc3h11a	12.0227	1.13065	4.45159e-25	2.13847e-24
1642	Emc1	12.0102	1.32931	1.15536e-26	5.91704e-26
1643	Tardbp	12.0038	0.946826	8.63169e-25	4.11175e-24
1644	Atp5b	12.0013	0.404357	3.05213e-27	1.59768e-26
1645	Trp53	11.9969	1.55003	2.84264e-26	1.43513e-25
1646	Nfib	11.9933	0.639026	2.45691e-25	1.19372e-24
1647	Rbmx	11.9902	2.46957	2.94945e-26	1.48729e-25
1648	Tmem37	11.9865	1.4774	1.89211e-25	9.25104e-25
1649	Mkrn1	11.9841	2.36525	1.74902e-26	8.888e-26
1650	Isca2	11.9819	0.635687	1.65595e-25	8.12438e-25
1651	Zmynd11	11.9682	0.896948	3.30609e-24	1.5472e-23
1652	Zmiz2	11.9647	2.40473	3.51938e-25	1.69735e-24
1653	Tomm6	11.9598	0.706484	1.13856e-26	5.83451e-26
1654	Kcnq4	11.9581	2.28112	3.73808e-26	1.8783e-25
1655	Card10	11.954	2.33965	4.06528e-25	1.9551e-24
1656	Nr1h2	11.9505	2.2818	2.20668e-25	1.07398e-24
1657	Dctn1	11.9453	0.974411	1.63871e-24	7.74977e-24
1658	Tpbgl	11.9332	1.21613	1.28522e-24	6.10513e-24
1659	Nsf	11.9201	1.65267	1.93233e-25	9.43685e-25
1660	Snhg8	11.917	0.977587	7.11719e-25	3.39982e-24
1661	Gatd3a	11.9053	0.683959	8.14915e-27	4.20127e-26
1662	Chmp1b	11.9045	2.39546	9.15369e-26	4.53797e-25
1663	Lrrc8a	11.8963	1.52403	2.55253e-25	1.23947e-24
1664	Scamp1	11.8926	1.43355	1.58168e-24	7.48423e-24
1665	Ankrd50	11.8857	2.31117	6.65552e-26	3.31686e-25
1666	Cmas	11.8773	0.913806	4.26136e-25	2.04824e-24
1667	Psmc3	11.8757	0.640734	7.14306e-27	3.69376e-26
1668	Ttc9c	11.8683	1.24346	1.43056e-25	7.03879e-25
1669	Rab11b	11.8614	0.857974	1.08628e-26	5.57329e-26
1670	Marchf2	11.8565	0.604471	1.52737e-24	7.23527e-24
1671	Pitpna	11.8551	0.835494	4.86404e-25	2.33397e-24
1672	Egflam	11.8498	2.24936	5.59527e-25	2.68183e-24
1673	Ubb-ps	11.8487	0.406378	1.66729e-25	8.1753e-25
1674	Tmem52	11.8472	0.846731	1.78313e-25	8.73321e-25
1675	Myom2	11.8443	0.76462	4.41964e-23	1.99281e-22
1676	Ano5	11.8422	0.641114	8.84794e-25	4.21241e-24
1677	Psmd4	11.8399	0.8297	1.53514e-25	7.54466e-25
1678	Tmem135	11.8324	2.3362	6.11049e-25	2.92384e-24
1679	Copb2	11.8315	0.821763	4.18029e-26	2.09926e-25
1680	Uqcr10	11.8292	0.50972	9.82029e-27	5.04452e-26
1681	Dtna	11.812	0.836983	1.00074e-25	4.95256e-25
1682	Cdc42ep3	11.81	1.26168	3.47561e-24	1.62564e-23
1683	Ranbp9	11.8082	2.27703	3.46303e-25	1.67207e-24
1684	Kat6a	11.807	1.30503	8.41155e-24	3.8916e-23
1685	Cox6a1	11.8009	1.23721	7.0942e-26	3.52929e-25
1686	BC029722	11.7971	29.0866	1.87228e-24	8.84454e-24
1687	Parvb	11.7907	1.04317	1.7983e-25	8.80245e-25
1688	Phactr2	11.7875	2.29817	2.88347e-25	1.39619e-24
1689	Hdac9	11.7855	29.154	2.02657e-24	9.55223e-24
1690	Fam13a	11.7849	2.29009	1.64797e-25	8.08989e-25
1691	Pdgfb	11.7788	1.47949	4.4037e-24	2.05297e-23
1692	Mindy2	11.7775	2.31045	9.94426e-26	4.92417e-25
1693	Pdp1	11.7763	0.857443	6.43939e-25	3.07949e-24
1694	Gaa	11.7697	1.00832	1.5597e-24	7.38432e-24
1695	Sult5a1	11.761	29.1022	2.39777e-24	1.12707e-23
1696	Septin4	11.7583	2.27135	9.45374e-25	4.4958e-24
1697	Spry1	11.7509	1.57424	4.05361e-25	1.95059e-24
1698	Pgam5	11.7504	2.27997	1.96567e-24	9.27031e-24
1699	Rab14	11.7492	1.11862	2.67881e-24	1.2571e-23
1700	Git2	11.7423	1.6111	3.92536e-24	1.83298e-23
1701	Cdc37l1	11.7373	2.21003	5.77504e-24	2.68494e-23
1702	Lman1	11.7189	1.1293	1.94928e-24	9.19809e-24
1703	Dynll2	11.7078	0.499079	1.38498e-25	6.82241e-25
1704	Rhoc	11.707	1.76447	2.82066e-25	1.36655e-24
1705	Bnip3l-ps	11.7061	0.708561	2.73325e-25	1.32496e-24
1706	Sec11a	11.7036	1.17113	9.80579e-24	4.52436e-23
1707	Ptov1	11.6868	1.18177	1.87451e-23	8.55627e-23
1708	Prune1	11.684	1.42533	3.92356e-24	1.83298e-23
1709	Ifngr1	11.6825	1.45504	1.44247e-24	6.84452e-24
1710	Tnmd	11.6603	29.581	4.77827e-24	2.22637e-23
1711	Lmo4	11.6535	0.622211	1.40388e-25	6.91154e-25
1712	Psmb3	11.6531	0.869473	6.8102e-24	3.15759e-23
1713	Dcxr	11.6336	2.30462	3.92572e-25	1.89011e-24
1714	Ablim1	11.6332	2.19966	1.93732e-24	9.14672e-24
1715	Zfp207	11.6313	1.52771	2.87352e-24	1.34772e-23
1716	Ddx5	11.622	0.847305	1.15837e-24	5.50563e-24
1717	Sfpq	11.6149	1.43795	8.55508e-25	4.07754e-24
1718	Tsc22d1	11.5915	0.754369	1.42144e-23	6.50214e-23
1719	Rhog	11.5848	1.43484	2.18247e-25	1.0628e-24
1720	Mpv17	11.5845	2.19943	2.62595e-24	1.23297e-23
1721	Snx9	11.5705	1.29231	1.18545e-23	5.43723e-23
1722	Hmga1	11.5637	1.03789	6.46825e-25	3.09156e-24
1723	Maco1	11.5511	1.22939	3.10231e-24	1.45343e-23
1724	Srrt	11.5428	1.6871	1.46155e-24	6.93117e-24
1725	Ryr1	11.542	0.56504	3.15473e-24	1.47718e-23
1726	Popdc2	11.5391	1.03959	8.84987e-23	3.96314e-22
1727	Hyal2	11.528	29.1768	1.18158e-23	5.42241e-23
1728	Myl6	11.5209	0.753923	1.47644e-25	7.26037e-25
1729	Nsfl1c	11.5184	1.334	4.83733e-24	2.25266e-23
1730	Abhd12	11.5164	1.5723	6.26394e-24	2.91065e-23
1731	Rnf123	11.5106	1.07925	1.23337e-23	5.65402e-23
1732	Rap1b	11.501	1.68337	2.05577e-24	9.6845e-24
1733	Osbpl5	11.4986	1.26018	1.00337e-23	4.6245e-23
1734	Col4a1	11.4878	1.19165	1.90417e-23	8.687e-23
1735	Tbc1d19	11.4797	2.25181	6.57004e-24	3.04956e-23
1736	Tbcb	11.4617	0.758859	2.92751e-25	1.41671e-24
1737	Spcs2	11.4578	0.716536	2.58981e-25	1.25685e-24
1738	Oxct1	11.4508	0.544521	5.70056e-24	2.65176e-23
1739	Tm9sf3	11.449	1.03688	4.0332e-23	1.82146e-22
1740	Scpep1	11.4481	2.91025	2.1187e-25	1.03293e-24
1741	Ints5	11.4469	2.34956	2.67893e-23	1.21565e-22
1742	Ndufa2	11.444	0.440739	1.4694e-24	6.96453e-24
1743	Capn2	11.4368	1.45249	8.32925e-24	3.85562e-23
1744	Vps52	11.4281	2.19907	1.05007e-23	4.83193e-23
1745	Tnnc2	11.4204	0.340836	3.78736e-25	1.82453e-24
1746	2700081O15Rik	11.4177	28.8602	2.50881e-23	1.13966e-22
1747	Afap1	11.4082	1.47102	1.25386e-23	5.74482e-23
1748	Slc12a2	11.4014	0.836569	1.31764e-24	6.25566e-24
1749	Acsl4	11.3974	2.22018	6.43596e-24	2.98895e-23
1750	Ufd1	11.3803	0.769753	7.38757e-25	3.52502e-24
1751	Psmd1	11.3734	0.941353	8.01582e-24	3.71254e-23
1752	Septin2	11.3664	1.09762	8.52523e-24	3.93991e-23
1753	Daxx	11.3663	2.20251	6.7436e-24	3.12841e-23
1754	Nemf	11.3649	2.28136	2.00385e-23	9.13199e-23
1755	Pxn	11.3579	1.07739	3.3744e-23	1.52555e-22
1756	Api5	11.3544	1.07564	1.00645e-23	4.63619e-23
1757	Snrpg	11.3506	1.24217	1.02125e-23	4.70182e-23
1758	Lpp	11.3452	1.28927	3.28794e-23	1.48725e-22
1759	Smarca2	11.327	0.48765	4.92942e-24	2.29429e-23
1760	Zfp617	11.3251	2.13604	2.41946e-23	1.10083e-22
1761	Tnnt1	11.3214	1.87928	2.18996e-24	1.03109e-23
1762	Irak1	11.3124	1.24573	1.06702e-22	4.7658e-22
1763	Skil	11.3017	1.20947	6.96292e-23	3.12634e-22
1764	Grk3	11.298	29.1982	5.67438e-23	2.55317e-22
1765	Sf3b6	11.2957	0.988151	1.29577e-23	5.93047e-23
1766	Gsn	11.2957	0.904603	2.51165e-23	1.14035e-22
1767	Ank3	11.2906	1.29487	1.93884e-23	8.84045e-23
1768	Erh	11.2787	1.01206	1.07649e-23	4.95079e-23
1769	Pmp22	11.267	2.37389	9.84368e-24	4.53939e-23
1770	Spop	11.2623	0.733273	8.11015e-22	3.51371e-21
1771	Lamtor3	11.2615	0.668838	3.01585e-23	1.3649e-22
1772	Plekha2	11.2545	1.42718	3.65333e-23	1.65078e-22
1773	Lum	11.2541	1.57532	2.97464e-23	1.34768e-22
1774	Bscl2	11.2536	2.33145	6.41956e-23	2.88389e-22
1775	Mtmr10	11.2412	2.22807	1.67571e-23	7.65297e-23
1776	Lmo7	11.2344	1.18284	1.16273e-22	5.18785e-22
1777	Btf3	11.2196	0.566103	2.21157e-24	1.0407e-23
1778	Snx13	11.2138	0.896886	1.31412e-22	5.85717e-22
1779	Pdrg1	11.2115	0.553618	2.17207e-23	9.89331e-23
1780	Sp1	11.2063	1.2408	5.45938e-23	2.45773e-22
1781	Psmd11	11.1982	0.849351	8.737e-23	3.91465e-22
1782	Clu	11.1933	1.38942	3.69412e-22	1.61941e-21
1783	Fbln2	11.1897	0.924687	1.28762e-23	5.89633e-23
1784	Fundc2	11.1866	0.343941	6.86982e-24	3.1835e-23
1785	Rock2	11.18	0.73064	4.22386e-23	1.90655e-22
1786	Mrps23	11.1734	0.673194	9.65822e-24	4.45869e-23
1787	Haus6	11.1701	1.43116	1.05154e-22	4.69911e-22
1788	Thrap3	11.1673	1.18729	9.48283e-23	4.24213e-22
1789	Atf7	11.1609	0.959599	1.45178e-22	6.4606e-22
1790	Ube4b	11.1575	1.19578	1.57905e-23	7.21924e-23
1791	Tmed2	11.1546	0.626199	3.64644e-24	1.7046e-23
1792	Pggt1b	11.1512	1.36923	4.63344e-22	2.02597e-21
1793	Sec61a2	11.1431	2.21443	2.11098e-22	9.32112e-22
1794	Saraf	11.142	0.501369	5.97508e-23	2.68563e-22
1795	Jmy	11.1351	2.15942	2.06807e-22	9.14586e-22
1796	U2af2	11.1272	0.892405	4.09862e-24	1.91284e-23
1797	Sf3b1	11.1229	1.41832	1.89315e-22	8.38535e-22
1798	Atp6v1d	11.1159	0.656481	1.14316e-23	5.25178e-23
1799	Sema6c	11.1156	1.56301	1.14983e-22	5.13298e-22
1800	Ostc	11.1106	1.20065	8.69719e-23	3.89887e-22
1801	Ppig	11.0936	1.02654	4.28415e-22	1.87517e-21
1802	Eprs	11.0929	0.537538	3.09195e-22	1.35753e-21
1803	Cox15	11.0768	2.22191	4.59566e-23	2.07109e-22
1804	Ky	11.0759	0.825161	2.48347e-23	1.12876e-22
1805	Sec62	11.0758	1.29857	9.13138e-22	3.94813e-21
1806	Zfp445	11.0682	1.24541	2.99522e-23	1.35628e-22
1807	Plpp1	11.0624	0.787572	8.90356e-22	3.85354e-21
1808	Tmx1	11.0507	1.12374	1.88591e-22	8.35763e-22
1809	Ip6k1	11.0415	1.14962	1.36215e-22	6.06492e-22
1810	Phf5a	11.0385	0.990732	4.17225e-22	1.82713e-21
1811	Anapc11	11.0372	0.906013	1.8568e-21	7.9556e-21
1812	Bub3	11.0313	0.831172	5.7749e-23	2.59703e-22
1813	Bcl6	11.0232	2.22892	2.72692e-21	1.16194e-20
1814	Trappc4	11.0219	2.15529	1.04996e-22	4.69454e-22
1815	Zranb1	11.0202	0.815051	2.09769e-22	9.26724e-22
1816	Copa	11.0172	0.659277	2.17393e-23	9.89648e-23
1817	Gnl3l	11.015	1.43455	4.67839e-22	2.04458e-21
1818	Bnip3l	10.9868	0.596314	2.3165e-22	1.02022e-21
1819	Arhgef6	10.9818	2.17899	2.31474e-22	1.01997e-21
1820	Scp2	10.9818	0.93422	5.22848e-22	2.2803e-21
1821	Morf4l2	10.9807	0.833054	1.10133e-23	5.06233e-23
1822	Kpna1	10.9792	0.680415	2.14383e-22	9.46127e-22
1823	Ppp5c	10.9769	2.19247	7.93509e-22	3.43961e-21
1824	Pgs1	10.9745	1.43349	3.1845e-22	1.39744e-21
1825	Fbxo3	10.9735	0.703795	5.50782e-22	2.39967e-21
1826	Rbm39	10.9728	1.35707	2.66636e-22	1.17369e-21
1827	Ppic	10.9652	1.486	2.25104e-22	9.92929e-22
1828	Fzd7	10.95	2.2169	4.72095e-22	2.06106e-21
1829	Smarcal1	10.9459	2.19455	9.45399e-23	4.23145e-22
1830	Nenf	10.9414	0.823519	1.79204e-22	7.9499e-22
1831	Mfsd5	10.9259	1.31627	5.11227e-23	2.30268e-22
1832	Chic2	10.9138	1.04825	1.83432e-22	8.13322e-22
1833	Pbx1	10.9134	1.13371	6.72609e-22	2.91852e-21
1834	Actr1a	10.9125	1.39689	6.07573e-22	2.6417e-21
1835	Stat3	10.902	1.52636	3.03237e-22	1.33343e-21
1836	Ak1	10.8981	0.300183	8.00923e-23	3.59235e-22
1837	Ldb3	10.8827	0.333147	1.74144e-22	7.73348e-22
1838	Mrpl24	10.8812	1.0118	4.71352e-22	2.05887e-21
1839	Creg1	10.8811	1.4133	5.10434e-22	2.2273e-21
1840	Ppp4r3b	10.8804	2.10143	3.05174e-22	1.34057e-21
1841	Rars	10.8731	0.872768	1.56145e-22	6.94142e-22
1842	Cops9	10.8641	0.796633	1.41636e-21	6.0899e-21
1843	Sarnp	10.8605	1.10121	1.49654e-21	6.43141e-21
1844	Secisbp2l	10.8591	1.35538	2.52144e-21	1.076e-20
1845	Trip12	10.8556	0.760405	1.35922e-22	6.05503e-22
1846	Btbd1	10.8498	0.67052	1.2517e-22	5.5819e-22
1847	Gapvd1	10.8306	1.1729	2.90757e-22	1.27921e-21
1848	Atp5pb	10.8275	0.414014	2.80818e-23	1.27362e-22
1849	Bnip3	10.8263	0.42621	1.58425e-22	7.0391e-22
1850	Zmynd8	10.8244	1.75451	4.60503e-22	2.01458e-21
1851	Zbtb20	10.8202	1.26281	6.01732e-21	2.53483e-20
1852	Dda1	10.8126	2.10318	3.69683e-21	1.56816e-20
1853	Rab12	10.8028	0.493725	1.74617e-22	7.75044e-22
1854	Zfp362	10.7994	1.33084	1.25517e-21	5.40232e-21
1855	Dnm3	10.7843	28.6578	1.84536e-21	7.91054e-21
1856	Rin2	10.7777	2.70839	4.25897e-23	1.92138e-22
1857	Snd1	10.7756	1.27972	6.10406e-22	2.65267e-21
1858	Aamp	10.7741	0.92728	1.55994e-22	6.93829e-22
1859	Sh3bp5	10.7676	1.2556	5.09247e-21	2.15161e-20
1860	Hexim1	10.7642	1.34085	2.33114e-21	9.95289e-21
1861	Smoc2	10.7613	1.19053	3.27798e-21	1.39257e-20
1862	Rtf1	10.7564	2.17155	1.70437e-21	7.30984e-21
1863	Trappc5	10.7563	2.08462	5.98884e-22	2.60525e-21
1864	Atpif1	10.7525	1.41972	6.46307e-22	2.80725e-21
1865	Tial1	10.7517	1.22755	1.89914e-21	8.12881e-21
1866	Cab39	10.6946	0.543884	2.04193e-21	8.72686e-21
1867	Rtl8a	10.6893	0.853949	4.27499e-21	1.81161e-20
1868	Eif3a	10.6839	2.12856	1.49825e-21	6.43551e-21
1869	Yeats4	10.6789	0.902601	5.48206e-22	2.38967e-21
1870	Nucks1	10.6733	1.06118	1.02966e-21	4.44292e-21
1871	Rbm24	10.6689	0.938116	1.87825e-21	8.04344e-21
1872	Pcbp4	10.6678	1.13149	2.61927e-21	1.11663e-20
1873	Tmod3	10.6668	2.14256	3.0385e-22	1.33543e-21
1874	Anp32b	10.6658	0.934799	6.19265e-21	2.6074e-20
1875	Rab7	10.6654	0.540773	3.88966e-21	1.64914e-20
1876	Smarcc2	10.6547	0.995108	1.21766e-21	5.24349e-21
1877	Eya1	10.6498	1.45347	1.59926e-21	6.86596e-21
1878	Pura	10.645	2.14679	5.27578e-21	2.22796e-20
1879	Txnl4a	10.641	2.14751	9.07199e-22	3.92444e-21
1880	Eif2a	10.6252	2.07639	1.15108e-21	4.96179e-21
1881	S100a16	10.6249	0.701739	2.09567e-22	9.26312e-22
1882	Speg	10.6162	0.67737	2.92311e-21	1.24367e-20
1883	Ogn	10.6124	1.13107	1.17062e-21	5.04348e-21
1884	Lgals3bp	10.6072	1.47739	3.38862e-22	1.48625e-21
1885	Ehbp1l1	10.605	0.752126	2.79221e-20	1.15848e-19
1886	Sri	10.5945	1.50414	6.57699e-22	2.85528e-21
1887	Nrip1	10.5852	1.19747	4.85412e-21	2.05294e-20
1888	Ptma	10.5834	2.55015	1.95141e-22	8.63892e-22
1889	Uba3	10.5834	1.16909	1.84325e-20	7.68878e-20
1890	Tom1l2	10.5833	0.827594	1.2935e-21	5.56448e-21
1891	Kbtbd12	10.5614	2.76243	2.31138e-22	1.01901e-21
1892	Ppp3r1	10.548	0.854653	9.04916e-20	3.68628e-19
1893	Lrrfip2	10.5462	1.11	6.0145e-21	2.53483e-20
1894	Acss1	10.5404	1.44452	8.93312e-21	3.75015e-20
1895	Fuz	10.5378	2.10145	1.67462e-21	7.18584e-21
1896	Nrp1	10.5301	1.24835	5.00466e-21	2.11556e-20
1897	Hnrnpu	10.5292	0.98953	2.74409e-21	1.16867e-20
1898	Snrpf	10.5139	0.999517	7.16128e-22	3.10577e-21
1899	Tmed4	10.501	1.26145	2.01279e-20	8.38369e-20
1900	Epb41l2	10.4944	1.51371	9.53592e-22	4.12095e-21
1901	Fam193a	10.4902	1.47548	2.61594e-21	1.11577e-20
1902	Il6st	10.4729	1.05965	2.02698e-21	8.66731e-21
1903	Agpat5	10.4649	0.739223	4.62522e-21	1.95711e-20
1904	Smap2	10.4581	1.35856	1.71668e-20	7.17487e-20
1905	Gstm1	10.456	0.394191	1.61973e-20	6.77631e-20
1906	Manf	10.4524	1.23078	3.3281e-21	1.41316e-20
1907	Hhatl	10.4515	1.24163	8.39368e-21	3.52543e-20
1908	Ppib	10.4376	1.42879	1.0495e-21	4.52625e-21
1909	Sf3b2	10.4287	1.20842	4.52527e-21	1.91576e-20
1910	Srpr	10.4215	1.06216	3.41737e-21	1.45034e-20
1911	Lgals9	10.4212	0.981544	9.56217e-22	4.1302e-21
1912	Bag6	10.4043	0.894771	1.71154e-20	7.15689e-20
1913	Zcchc24	10.4034	1.08206	3.15198e-21	1.33971e-20
1914	Nktr	10.4002	1.20141	5.44666e-21	2.29898e-20
1915	Atp6v0e	10.3973	1.25663	3.02653e-21	1.28703e-20
1916	Tpp2	10.3665	0.958471	5.62395e-21	2.37264e-20
1917	Rnf19b	10.3628	1.36311	1.79822e-20	7.50462e-20
1918	Ssr1	10.3625	0.963387	2.1506e-19	8.67365e-19
1919	Caprin1	10.3463	0.908931	4.27796e-21	1.81196e-20
1920	Psma3	10.329	0.406963	2.8233e-21	1.2018e-20
1921	Srp9	10.3204	0.484498	7.84888e-21	3.29986e-20
1922	Nras	10.3164	1.17874	2.70031e-20	1.12144e-19
1923	Fzr1	10.3134	1.36939	2.61332e-20	1.08615e-19
1924	Ino80b	10.3108	2.13023	2.71771e-20	1.12812e-19
1925	1700025G04Rik	10.3035	0.959427	2.29893e-20	9.57081e-20
1926	Hspb8	10.2899	0.655976	4.94674e-20	2.03751e-19
1927	Gatad2b	10.2847	1.02668	3.2797e-20	1.3581e-19
1928	D8Ertd738e	10.2726	0.583057	2.19721e-21	9.38576e-21
1929	Mocs2	10.2724	2.02634	1.92001e-20	8.00113e-20
1930	Bbs2	10.2429	1.39226	4.74426e-20	1.956e-19
1931	Ubfd1	10.2396	2.0936	1.41861e-20	5.94366e-20
1932	Arf5	10.2366	1.21406	1.86853e-20	7.79043e-20
1933	Ube3a	10.2365	0.558474	3.37573e-20	1.39583e-19
1934	Fnbp1	10.2327	1.59928	6.83865e-21	2.87798e-20
1935	Psmd14	10.2306	0.571816	1.5651e-20	6.55098e-20
1936	Tsfm	10.2217	2.06188	2.52612e-20	1.05064e-19
1937	Serbp1	10.21	0.584745	1.49681e-20	6.26822e-20
1938	Stard7	10.2079	0.846585	7.96139e-21	3.34551e-20
1939	Rsl1d1	10.203	1.18555	6.23182e-20	2.55817e-19
1940	Atp6v0d1	10.2025	1.05571	4.17244e-20	1.72191e-19
1941	Nek1	10.1998	1.56255	8.23892e-20	3.36587e-19
1942	Hnrnpd	10.1929	1.43018	9.63798e-21	4.04406e-20
1943	C1s1	10.1916	1.48057	1.74782e-20	7.30142e-20
1944	Myo18a	10.1833	0.835201	1.26879e-20	5.31856e-20
1945	Hspb1	10.175	0.707022	1.33986e-19	5.44341e-19
1946	Cox8b	10.1684	0.415403	5.78527e-21	2.43949e-20
1947	Sema3c	10.1639	1.27744	2.50266e-19	1.0046e-18
1948	Hnrnpk	10.1626	1.03544	2.99791e-20	1.24322e-19
1949	Rwdd4a	10.1569	1.0031	7.51459e-20	3.07438e-19
1950	Sspn	10.1475	1.26502	2.29171e-19	9.22095e-19
1951	Pnisr	10.1384	1.29025	3.32871e-20	1.37705e-19
1952	Snrpb	10.1295	0.897946	3.93281e-19	1.57054e-18
1953	Aprt	10.1176	1.2834	3.10561e-20	1.28663e-19
1954	Sort1	10.1161	1.35237	8.57062e-20	3.49468e-19
1955	Ndfip1	10.1094	1.30181	5.48273e-20	2.25284e-19
1956	Cbx5	10.1094	1.16184	1.6773e-19	6.80016e-19
1957	Cyb5r3	10.1016	1.11307	1.76275e-20	7.36019e-20
1958	Tomm40l	10.0962	2.0224	6.50962e-20	2.66963e-19
1959	Sulf1	10.0821	1.56215	4.03441e-20	1.66576e-19
1960	Atp2b1	10.0818	1.28875	7.433e-20	3.04246e-19
1961	Tmem14c	10.0589	0.88154	1.98603e-19	8.03272e-19
1962	Ube2d2a	10.0527	0.90639	1.98079e-19	8.01534e-19
1963	Ppp1ca	10.0517	0.744785	2.32198e-20	9.66205e-20
1964	Prkaca	10.0515	0.880535	3.32828e-20	1.37705e-19
1965	U2af1	10.0436	1.16139	5.2056e-20	2.1431e-19
1966	Itga1	10.0428	2.04595	8.48648e-20	3.46369e-19
1967	Usp4	10.0386	0.70364	6.73729e-20	2.76034e-19
1968	Stub1	10.0332	0.747019	8.42021e-20	3.43829e-19
1969	Snx3	10.0314	0.424252	5.97106e-20	2.45231e-19
1970	Mpp5	10.0243	1.16173	2.90451e-19	1.16262e-18
1971	Polr2f	10.0167	0.844962	2.89855e-19	1.16078e-18
1972	Lamc1	9.9963	1.22939	2.57385e-19	1.03269e-18
1973	Ubr2	9.98959	1.06726	1.17318e-19	4.76997e-19
1974	Htra2	9.987	1.45478	2.05572e-19	8.30669e-19
1975	3300002P13Rik	9.98676	0.775977	2.43745e-19	9.79807e-19
1976	Ryk	9.98507	0.779806	1.29622e-18	5.07412e-18
1977	Epm2aip1	9.98417	1.07985	6.43114e-19	2.54557e-18
1978	Thumpd1	9.98361	1.22759	4.41355e-19	1.76005e-18
1979	Rexo2	9.9703	0.59767	2.61405e-20	1.08615e-19
1980	Hspb2	9.95859	0.927102	2.25097e-19	9.06985e-19
1981	Scamp2	9.95856	1.34595	6.92932e-20	2.83766e-19
1982	Dynlt1c	9.95757	29.3291	4.61964e-19	1.84051e-18
1983	Bcap31	9.95331	0.85188	2.22292e-18	8.63828e-18
1984	Fcgrt	9.94921	0.966013	1.67821e-19	6.80064e-19
1985	Capn1	9.94802	1.32597	2.83987e-19	1.13835e-18
1986	Dynlt1b	9.94712	29.3992	4.94971e-19	1.96742e-18
1987	Srsf4	9.9407	1.27259	2.44858e-19	9.83355e-19
1988	Slc1a5	9.93884	1.42375	4.60267e-20	1.89855e-19
1989	Mtus1	9.93258	0.831185	2.06799e-19	8.35231e-19
1990	Map3k3	9.92458	2.18929	7.59551e-20	3.10599e-19
1991	Tcp1	9.92282	0.518652	3.90261e-20	1.61212e-19
1992	Sec24d	9.92276	1.55158	1.41332e-19	5.73811e-19
1993	Nptn	9.92164	1.07791	2.44524e-19	9.82476e-19
1994	Uqcc2	9.91611	0.553435	5.84674e-19	2.31856e-18
1995	Trmt112-ps2	9.91232	29.3488	6.22826e-19	2.46756e-18
1996	Parp3	9.89764	0.781469	2.10708e-19	8.50618e-19
1997	Smdt1	9.89691	0.439176	9.10189e-19	3.58439e-18
1998	Zfp651	9.89299	0.685986	1.22092e-18	4.78595e-18
[truncated: 6,523 more rows]

## Sheet: DEG Ctr vs WT
	names	scores	logfoldchanges	pvals	pvals_adj
0	BC085271	43.3115	32.302	1.83145e-73	8.21453e-71
1	Ndufa12-ps	41.8651	1.06508	7.36026e-108	3.13621e-104
2	Ptp4a2	37.0709	1.46086	6.64493e-95	1.13256e-91
3	DMD	36.453	32.6823	2.26998e-65	5.22831e-63
4	Pcbp2	34.7225	1.01118	7.47053e-91	1.06106e-87
5	Tuba4a	33.9902	0.906403	2.18669e-90	2.66213e-87
6	Ywhag	33.9654	1.76671	3.2738e-89	3.48741e-86
7	Tnnc2	32.3311	0.973931	1.30003e-86	1.10788e-83
8	Lpin1	31.5667	1.74927	8.51787e-83	6.59902e-80
9	Per1	31.0038	32.494	5.72312e-58	7.17241e-56
10	Eif3l	30.7619	1.13911	1.27386e-81	8.35067e-79
11	Ddit4	30.421	32.9904	4.07253e-57	4.8203e-55
12	Atp2a1	29.1219	0.887956	4.66748e-75	2.33978e-72
13	Klhl24	28.8157	1.29685	5.13323e-73	2.18727e-70
14	Pdha1	28.4912	0.933099	4.87637e-72	1.8068e-69
15	Eif1	28.3755	0.8435	1.93494e-76	1.0306e-73
16	Acot2	27.9055	33.5349	2.74877e-53	2.57418e-51
17	Tfg	27.7086	1.28474	2.4034e-68	7.06268e-66
18	Lrp6	27.6963	1.25412	4.30553e-70	1.41122e-67
19	Bclaf1	27.4149	31.9788	1.64479e-52	1.46009e-50
20	Acta1	27.2019	0.791803	1.25475e-72	4.86043e-70
21	Tcap	27.1146	1.27478	1.65179e-62	2.81531e-60
22	Map3k12	26.3858	32.2272	7.57502e-51	6.26741e-49
23	Slc25a25	26.3447	31.7007	8.84843e-51	7.18156e-49
24	Atp1a2	26.2878	1.0667	2.60153e-67	7.15169e-65
25	Tada2b	26.2877	31.9445	1.0977e-50	8.8251e-49
26	Septin7	26.1161	1.28072	7.44673e-67	1.8665e-64
27	Kif1c	25.8831	1.24698	1.69019e-68	5.1442e-66
28	Pnpla2	25.8597	1.93268	6.18642e-64	1.1982e-61
29	Speg	25.4024	1.52443	2.46464e-59	3.44322e-57
30	Ndrg2	25.1114	0.784617	2.86477e-67	7.62923e-65
31	Aco2	25.1045	0.916222	3.3369e-64	6.77072e-62
32	Tob2	24.8427	4.10497	7.01241e-64	1.32799e-61
33	Pgam2	24.8328	0.926201	1.93605e-66	4.58307e-64
34	Eif4b	24.6825	1.06669	3.1408e-64	6.52826e-62
35	Hsp90ab1	24.4435	0.942626	3.08366e-65	6.91551e-63
36	Psmd11	24.349	1.77728	1.08238e-57	1.33681e-55
37	Lmo4	24.2742	1.22438	2.5202e-63	4.5696e-61
38	mt-Rnr2	24.2309	1.12522	9.94026e-65	2.17207e-62
39	Ctsb	24.212	0.710224	1.43065e-60	2.06644e-58
40	Nfic	23.9821	1.12413	5.24122e-62	8.27142e-60
41	Fam214b	23.9167	31.9222	1.16455e-46	6.05142e-45
42	Cacna2d1	23.8314	1.12308	1.93499e-61	2.94464e-59
43	Rhob	23.8067	4.07599	1.79098e-62	2.9927e-60
44	Psmc2	23.7844	1.02966	7.1352e-63	1.24094e-60
45	Pfdn6	23.6342	31.6516	3.66254e-46	1.84687e-44
46	St13	23.6204	1.10552	2.05071e-61	3.06599e-59
47	Hk2	23.5847	1.72505	4.00432e-62	6.43864e-60
48	Larp4	23.5265	1.79167	2.36052e-62	3.86853e-60
49	Npm1	23.2308	1.15526	6.96781e-59	9.31944e-57
50	Cs	22.727	0.927611	8.1965e-60	1.16418e-57
51	Slc25a39	22.5095	1.12977	1.23868e-58	1.62401e-56
52	Ppp1r3c	22.4784	1.59414	6.36497e-53	5.8325e-51
53	Spen	22.4241	3.78377	1.10883e-54	1.1117e-52
54	Gstp-ps	22.2624	0.743507	6.99888e-59	9.31944e-57
55	Gabarap	22.2145	1.0127	1.57976e-58	2.0398e-56
56	Eef1a2	22.0853	0.82095	2.58586e-58	3.28907e-56
57	Csnk2a1	21.9026	1.34345	1.77514e-56	2.01703e-54
58	Lpl	21.8367	1.53251	1.48625e-57	1.8094e-55
59	Rab12	21.8333	0.961559	1.59712e-55	1.70134e-53
60	Psma6	21.8062	1.14892	1.45508e-56	1.6757e-54
61	Eif5a	21.7835	0.868135	1.96447e-57	2.35792e-55
62	Tle5	21.6785	0.7017	4.1919e-57	4.89362e-55
63	Tbcel	21.4013	31.7943	4.34371e-42	1.58193e-40
64	Csde1	21.3952	0.652048	4.26605e-55	4.43357e-53
65	Gsk3a	21.3431	0.867721	4.89573e-56	5.41837e-54
66	Ptp4a3	21.1956	1.07045	2.90676e-52	2.50216e-50
67	Fzd4	21.1953	3.7348	2.99163e-53	2.77116e-51
68	Fosl2	21.0905	31.286	1.6801e-41	5.82024e-40
69	Srrm1	20.9783	31.5637	2.74656e-41	9.21504e-40
70	Mafb	20.9311	3.62791	4.32503e-54	4.1884e-52
71	Ogdh	20.8806	0.913873	1.94187e-54	1.92426e-52
72	Gadd45g	20.8762	2.71643	3.50958e-48	2.21545e-46
73	Supt16	20.7861	31.4529	6.39659e-41	2.1047e-39
74	Trim54	20.7822	1.32799	2.92751e-54	2.86761e-52
75	Ube2l6	20.7729	31.7849	6.78024e-41	2.22236e-39
76	Chd4	20.7339	3.59593	2.23337e-52	1.96214e-50
77	Cebpb	20.679	4.57965	1.09554e-53	1.04901e-51
78	Got1	20.5401	1.09089	5.18184e-49	3.59022e-47
79	Ppp1r3a	20.3655	3.6564	4.00648e-49	2.79862e-47
80	Ptpn1	20.3077	31.4087	5.34709e-40	1.62163e-38
81	Slc6a9	20.2895	31.5481	5.80066e-40	1.72844e-38
82	Jund	20.2747	1.65758	7.10557e-48	4.32526e-46
83	Tmtc3	20.2106	31.4512	8.25861e-40	2.44375e-38
84	Serpinb6a	20.184	1.15113	1.17909e-51	9.94872e-50
85	Nos1	20.1302	1.68901	2.72028e-49	1.94809e-47
86	Svil	20.1026	0.683955	7.93794e-51	6.50453e-49
87	Actb	20.048	0.962624	2.64576e-50	2.04975e-48
88	Tcf25	19.9985	1.49349	3.24587e-49	2.28606e-47
89	Fyco1	19.9361	0.868494	1.22084e-50	9.72336e-49
90	Neb	19.7767	0.782841	1.08899e-49	8.28607e-48
91	Snrpf	19.615	1.6347	2.65848e-48	1.70343e-46
92	Cab39	19.5352	1.23248	2.39814e-50	1.87495e-48
93	Mcl1	19.5296	1.43629	1.50654e-49	1.13617e-47
94	Map1lc3a	19.4733	0.999073	1.85939e-49	1.36601e-47
95	Klf9	19.4599	1.76179	2.24446e-47	1.29238e-45
96	Med6	19.4425	31.3421	2.67699e-38	7.21941e-37
97	Mypn	19.4109	1.22773	3.20009e-47	1.79415e-45
98	Tsc22d3	19.3974	1.85619	7.30313e-49	4.93947e-47
99	Srsf2	19.3556	1.41782	8.60391e-49	5.72832e-47
100	Pi16	19.3502	4.10133	2.01577e-48	1.32141e-46
101	Gstp1	19.3429	0.653076	1.82161e-49	1.34989e-47
102	Ube3a	19.261	1.16393	2.78012e-49	1.97435e-47
103	Gatad2b	19.2246	1.79176	2.96322e-44	1.30842e-42
104	Klf2	19.0987	3.42825	9.14639e-47	4.84134e-45
105	Sf1	19.0802	1.84595	3.78847e-48	2.37392e-46
106	Dnaja2	19.0791	0.991119	5.73829e-49	3.94368e-47
107	Nfkbia	19.005	1.67249	8.58105e-47	4.59923e-45
108	Acss1	18.9841	3.59595	2.86343e-47	1.61604e-45
109	Kdm2a	18.9535	3.52815	2.05963e-48	1.32971e-46
110	Glul	18.9427	2.12807	1.78651e-48	1.18021e-46
111	Ccser2	18.9221	1.00481	2.03277e-48	1.32239e-46
112	Hrc	18.8651	0.796528	4.94059e-47	2.68177e-45
113	Celf2	18.8366	1.60956	4.28883e-44	1.84593e-42
114	Pabpn1	18.81	3.37508	1.02071e-44	4.6516e-43
115	Gpx4-ps2	18.7961	1.05967	4.52545e-48	2.79463e-46
116	Fam98b	18.7751	1.84167	2.84147e-47	1.61433e-45
117	Gstp2	18.768	0.649156	7.09086e-48	4.32526e-46
118	Sqstm1	18.6321	0.986683	1.45773e-47	8.5674e-46
119	Bsg	18.6227	0.711841	3.43504e-47	1.91329e-45
120	Zmiz1	18.5958	3.51313	1.20447e-43	4.93485e-42
121	Map1lc3b	18.5855	0.744847	3.97471e-47	2.18532e-45
122	Nfix	18.5405	1.14898	1.01449e-46	5.33672e-45
123	Tbc1d23	18.5278	31.4519	1.85702e-36	4.34768e-35
124	Prkab2	18.3872	1.14686	1.90195e-43	7.71828e-42
125	Rasd2	18.3334	3.52014	1.25696e-45	6.15621e-44
126	Calr	18.2613	1.05764	1.43724e-42	5.34853e-41
127	Pvalb	18.0946	0.754367	1.60902e-45	7.74694e-44
128	Eif2b4	18.0944	1.30501	1.25695e-45	6.15621e-44
129	Mga	18.0781	3.51294	9.28717e-46	4.60147e-44
130	Ubn2	18.0527	3.2935	1.65615e-41	5.76068e-40
131	Ccnk	18.0193	1.28631	1.28295e-41	4.53663e-40
132	Vcp-rs	18.0184	1.70843	1.52043e-45	7.40408e-44
133	Acin1	18.0063	1.74919	3.02633e-45	1.44081e-43
134	Utp3	17.9823	3.31282	6.62333e-45	3.08437e-43
135	Rbm25	17.9515	1.99635	7.95841e-44	3.34097e-42
136	Usp2	17.9401	1.74693	1.01686e-44	4.6516e-43
137	Zfr	17.9183	1.12657	2.35021e-44	1.04861e-42
138	Pabpc1	17.858	1.56496	4.20101e-42	1.53652e-40
139	Srrm2	17.8445	2.22937	7.93795e-43	3.00654e-41
140	Sdr39u1	17.8324	0.711145	7.43157e-45	3.42334e-43
141	Akt2-ps	17.8009	3.00717	3.20532e-43	1.27169e-41
142	Anxa11	17.7893	2.98414	8.10501e-41	2.61632e-39
143	Mical2	17.7775	1.98215	4.32353e-41	1.43926e-39
144	Cox4i1	17.7633	0.582353	3.89455e-44	1.70202e-42
145	Fbxo32	17.7605	2.36712	1.02595e-37	2.63347e-36
146	Tom1l2	17.6586	1.34629	5.81329e-43	2.24167e-41
147	Zfp626	17.629	31.1692	1.32698e-34	2.73153e-33
148	Mafg	17.5809	3.3329	3.28273e-39	9.45116e-38
149	Tapt1	17.5733	3.32369	7.76598e-44	3.27632e-42
150	Brd4	17.548	3.30215	2.56569e-43	1.03136e-41
151	Nacc2	17.5404	1.53412	4.74714e-43	1.85574e-41
152	Sap18b	17.4654	0.808434	1.02278e-43	4.23115e-42
153	Ctsd	17.4414	1.05955	1.00235e-43	4.16685e-42
154	D5Ertd579e	17.4401	1.20847	5.49716e-43	2.13913e-41
155	Atrnl1	17.327	31.0742	5.69924e-34	1.12168e-32
156	Des	17.3254	0.682984	3.45558e-40	1.06312e-38
157	Ndufa12	17.3115	0.398829	6.15907e-43	2.36431e-41
158	Ubxn4	17.3023	1.0747	7.09426e-43	2.69898e-41
159	Larp1	17.2769	1.68967	1.44283e-40	4.60515e-39
160	Trdn	17.2618	1.20316	8.06081e-43	3.03957e-41
161	R3hdm4	17.2434	0.938845	5.76725e-43	2.23402e-41
162	Hr	17.1614	3.50801	3.51824e-40	1.0785e-38
163	Acsl1	17.1517	0.967145	5.82247e-42	2.1025e-40
164	Pdlim5	17.1482	1.11404	1.63448e-42	6.05612e-41
165	Tacc2	17.1169	1.93359	1.80002e-39	5.23541e-38
166	Uqcrc1	17.0889	0.690749	6.44743e-42	2.31835e-40
167	Ppp3ca	17.0158	0.947868	1.75949e-41	6.04611e-40
168	Atxn2l	17.0014	3.90145	1.87969e-40	5.91097e-39
169	Sec62	16.998	1.90729	1.10948e-36	2.64846e-35
170	Ppig	16.969	1.56321	6.44852e-39	1.81968e-37
171	Zfhx2	16.9551	31.1394	3.48354e-33	6.48183e-32
172	Actr1b	16.9058	0.763322	2.33702e-40	7.29526e-39
173	Hnrnpc	16.9022	0.943532	5.62514e-42	2.03989e-40
174	Neat1	16.8537	1.59649	1.22667e-38	3.36132e-37
175	Atp5k	16.8504	0.684274	1.73321e-41	5.97994e-40
176	Hba-a2	16.8404	2.82709	1.11724e-41	3.96714e-40
177	Eif4g1	16.8358	0.998536	2.36969e-41	8.01367e-40
178	Rtn2	16.8218	0.806926	1.08598e-41	3.87228e-40
179	Samd8	16.808	3.39934	1.96351e-41	6.72009e-40
180	Tcof1	16.808	3.06222	5.20081e-39	1.48232e-37
181	Rnf20	16.7973	3.1256	1.5835e-40	4.99801e-39
182	Mphosph8	16.7805	3.30807	1.47514e-41	5.19469e-40
183	Mpv17l2	16.7189	3.06515	3.84731e-40	1.17515e-38
184	Slc12a2	16.7069	1.17885	1.34934e-40	4.33928e-39
185	Prpf38b	16.6926	31.1094	1.26331e-32	2.28092e-31
186	Mef2d	16.6296	1.35943	8.06202e-41	2.61234e-39
187	Sap18	16.6027	0.758288	5.28406e-41	1.75217e-39
188	Cdkn1a	16.5889	4.63211	4.81669e-38	1.26691e-36
189	Zfp651	16.5404	1.15795	8.14196e-38	2.1026e-36
190	Hbs1l	16.4995	1.07865	9.88014e-40	2.91345e-38
191	Ftl1	16.4893	1.11694	5.37227e-40	1.62349e-38
192	Eif5b	16.4754	1.44553	9.66111e-39	2.68182e-37
193	Smc3	16.4492	1.20704	5.13035e-38	1.33703e-36
194	Psmd1	16.4229	1.40028	1.25356e-39	3.67107e-38
195	Tomm6	16.3889	1.03461	2.77801e-40	8.57762e-39
196	Cdkn1b	16.3356	1.65203	1.73696e-36	4.07779e-35
197	Naca	16.3019	1.30486	1.35021e-39	3.94058e-38
198	Rnf19a	16.301	3.05245	5.54413e-40	1.66805e-38
199	Cacng1	16.291	0.887905	5.55887e-40	1.66805e-38
200	Tnrc6b	16.2896	3.3163	5.65771e-40	1.69175e-38
201	Strn3	16.2528	1.792	3.67798e-39	1.0518e-37
202	Cdc42ep3	16.1701	1.76767	1.53359e-37	3.88966e-36
203	Ubr5	16.1632	3.03119	1.70254e-38	4.63547e-37
204	Zbtb4	16.1216	3.02369	1.31935e-38	3.60368e-37
205	Eef2	16.1154	0.822451	2.83122e-39	8.20668e-38
206	Kdelr2	16.1148	1.2997	4.54975e-37	1.12712e-35
207	Obscn	16.0508	1.04478	2.29182e-38	6.20029e-37
208	Gpt2	16.0472	1.02794	2.40892e-37	6.00257e-36
209	Pbxip1	16.0416	1.28329	5.42088e-39	1.53477e-37
210	Commd6	16.0058	30.919	3.82685e-31	6.1766e-30
211	Ablim3	15.9997	1.63983	2.04818e-37	5.14886e-36
212	Son	15.9664	1.24455	7.98515e-35	1.66788e-33
213	Tmed7	15.944	3.1555	7.48827e-39	2.0923e-37
214	Luc7l3	15.935	3.21534	9.31361e-39	2.59381e-37
215	Eprs	15.9325	0.859289	2.96506e-38	7.97106e-37
216	Siva1	15.9293	1.13729	4.63263e-38	1.22227e-36
217	Wdr43	15.8991	3.11237	1.04747e-38	2.89823e-37
218	Myh4	15.8104	0.718455	2.15657e-37	5.40538e-36
219	Rora	15.7791	1.71571	1.2794e-37	3.2644e-36
220	Med13	15.7635	2.02354	1.09866e-34	2.2836e-33
221	Hnrnpf	15.7621	3.16294	3.09526e-38	8.29492e-37
222	Kmt2e	15.7619	3.07334	4.77827e-37	1.1803e-35
223	Zbtb20	15.7167	1.84344	8.6306e-35	1.79829e-33
224	Pank1	15.6648	3.82419	3.27952e-36	7.51292e-35
225	Galnt2l	15.6638	2.83023	2.31852e-35	5.05331e-34
226	Galnt2	15.65	2.82993	2.60654e-35	5.65216e-34
227	Huwe1	15.6479	3.13881	9.57441e-37	2.31799e-35
228	Casz1	15.6425	3.05032	2.20149e-37	5.50179e-36
229	Ttn	15.6184	0.973604	1.50023e-37	3.81641e-36
230	Zfp664	15.6045	30.6855	2.88144e-30	4.36932e-29
231	Tnfaip2	15.5961	1.01707	1.12226e-37	2.87203e-36
232	Sh3bp5	15.5841	1.83357	2.24264e-35	4.91306e-34
233	Akt2	15.5638	0.809084	1.68966e-36	3.9777e-35
234	Mbnl1	15.4604	0.945265	1.39046e-36	3.30069e-35
235	Ybx1	15.4317	0.966783	9.46083e-37	2.29701e-35
236	Jade1	15.4226	1.82697	9.98026e-37	2.4094e-35
237	Gaa	15.4101	1.49954	5.96816e-37	1.46151e-35
238	Sfswap	15.4088	3.07722	4.25971e-37	1.05835e-35
239	Hipk2	15.3847	3.03634	1.05704e-36	2.53749e-35
240	Ubb-ps	15.3807	0.778261	1.4607e-35	3.22489e-34
241	Bcl9l	15.3651	3.12472	1.06931e-36	2.55973e-35
242	Akirin1	15.3611	2.80392	2.73602e-36	6.3188e-35
243	Rere	15.3024	1.45972	1.04724e-36	2.52107e-35
244	Pbrm1	15.2626	2.96066	2.03039e-35	4.45953e-34
245	Sf3a2	15.2515	3.0554	2.25073e-35	4.91814e-34
246	Tmed10	15.2299	0.748609	8.19665e-36	1.83821e-34
247	Synj2bp	15.2227	1.7431	2.04325e-36	4.7586e-35
248	Sumo3	15.1999	1.01441	2.04371e-36	4.7586e-35
249	Golgb1	15.1756	1.54954	1.61087e-34	3.28416e-33
250	Sec24a	15.1532	2.06929	1.08438e-35	2.41281e-34
251	Selenow	15.1373	0.522187	3.43854e-36	7.85609e-35
252	Hdgf	15.1256	0.566294	3.64047e-36	8.29521e-35
253	Ppp2r2d	15.1193	1.12697	2.46722e-35	5.3637e-34
254	Psmd4	15.108	1.20858	4.09849e-36	9.31396e-35
255	Fnta	15.078	0.824239	7.15056e-36	1.61637e-34
256	Nipbl	15.0136	3.07197	3.25075e-35	7.01339e-34
257	Mllt6	14.9546	2.93031	4.12121e-35	8.82435e-34
258	Mark2	14.9166	2.88345	3.22961e-35	6.98547e-34
259	Tmem37	14.8933	2.3201	3.47247e-35	7.47282e-34
260	Ddx18	14.8817	2.83581	4.6222e-34	9.16055e-33
261	Set	14.8433	1.18083	1.4862e-34	3.03726e-33
262	Ckm	14.8218	0.48151	7.61051e-35	1.59746e-33
263	Gpx3	14.8175	0.804708	4.35105e-33	8.0608e-32
264	Hcfc1	14.8143	3.0312	1.317e-34	2.71756e-33
265	Abcf1	14.805	2.81827	5.72688e-35	1.20803e-33
266	Trip10	14.8047	1.84804	1.2418e-34	2.57484e-33
267	Vdac2	14.7945	0.605681	1.26778e-34	2.62234e-33
268	Rapgef1	14.7928	0.891081	1.44461e-33	2.77274e-32
269	Ppp1r15a	14.7847	2.28946	7.94589e-35	1.66376e-33
270	Vldlr	14.7491	0.952684	1.23601e-33	2.3831e-32
271	Ftl1-ps1	14.7329	0.871692	1.33821e-34	2.748e-33
272	Fth1	14.7074	0.504351	3.76296e-34	7.51005e-33
273	Rock2	14.69	1.04568	1.63646e-34	3.32838e-33
274	Atp6v0a1	14.6882	1.86387	6.73695e-34	1.31078e-32
275	Eno3	14.6611	0.40499	1.63183e-33	3.09033e-32
276	Gpi1	14.6473	0.699734	8.40635e-34	1.63186e-32
277	Mrps17	14.6431	0.63699	2.30831e-34	4.67254e-33
278	Atp5b	14.5564	0.470297	2.63125e-34	5.28856e-33
279	Slc25a42	14.5544	2.17219	2.92428e-34	5.86371e-33
280	Eif3a	14.5477	2.80792	1.35983e-33	2.61592e-32
281	Zfp715	14.5413	3.12525	4.20942e-34	8.38147e-33
282	Ktn1	14.5132	1.22582	2.00219e-33	3.7583e-32
283	Birc6	14.4768	2.95058	5.19703e-34	1.02521e-32
284	Smox	14.4746	1.29983	1.12103e-31	1.90687e-30
285	Gatd3a	14.459	0.778942	6.7033e-34	1.30722e-32
286	Apba3	14.4437	2.95254	6.34165e-34	1.24238e-32
287	Ehd4	14.4165	0.814841	1.00082e-33	1.9384e-32
288	Rbm28	14.4147	2.79122	5.44805e-33	1.00494e-31
289	Igf2r	14.3941	2.85132	2.66415e-33	4.96802e-32
290	Cux1	14.3387	1.13455	3.34618e-32	5.91621e-31
291	Ube2b	14.3212	0.539034	1.33675e-32	2.40333e-31
292	Timm13	14.3102	2.84413	5.78677e-33	1.06512e-31
293	Rnf5	14.3028	1.73427	2.18238e-33	4.08752e-32
294	Gstm1	14.2892	0.653363	1.99046e-33	3.7528e-32
295	Zbtb16	14.2781	3.05392	4.06936e-33	7.55535e-32
296	Rbm24	14.2475	1.22393	1.23412e-31	2.08261e-30
297	Ell2	14.2211	2.90919	2.11239e-32	3.77396e-31
298	Vcp	14.1887	0.907301	6.84646e-33	1.25745e-31
299	Pde4b	14.1358	1.56216	2.74429e-32	4.87226e-31
300	Cul3	14.1264	0.507439	5.03384e-32	8.8087e-31
301	Lims1	14.1135	2.92989	7.63825e-33	1.39985e-31
302	Pard3	14.1113	2.8971	7.79171e-33	1.42491e-31
303	Slc30a4	14.074	2.75637	6.10386e-32	1.05298e-30
304	Tmem52	14.0714	1.22663	1.30757e-32	2.35583e-31
305	Coa7	14.0524	2.82143	1.5165e-31	2.53405e-30
306	Mfap1a	14.0477	2.8226	1.24178e-32	2.2468e-31
307	Tcf7l2	13.9965	2.8696	2.09207e-32	3.74551e-31
308	Bcas3	13.9663	2.81013	4.27115e-32	7.5204e-31
309	Mllt3	13.9595	0.614375	2.3728e-32	4.2215e-31
310	Nfia	13.9542	2.8326	1.17833e-31	1.9924e-30
311	Deptor	13.9387	1.60257	2.40852e-31	3.9472e-30
312	Trim63	13.9267	2.02822	1.3423e-28	1.848e-27
313	Cd24a	13.9247	0.652937	5.17372e-32	9.03492e-31
314	Mtdh	13.9026	0.999116	6.9732e-31	1.10252e-29
315	Il11ra1	13.8835	1.03603	5.50628e-32	9.57643e-31
316	Entpd4	13.8779	0.766819	5.53224e-32	9.60199e-31
317	Kank2	13.8772	2.84462	6.54013e-32	1.11918e-30
318	Cbx1	13.8745	2.72815	5.45142e-32	9.50041e-31
319	Acadl	13.8656	0.71213	6.5179e-32	1.11762e-30
320	Entpd4b	13.8634	0.768146	6.05116e-32	1.046e-30
321	Npepps	13.8519	1.13855	1.08748e-30	1.70359e-29
322	Smarcd3	13.8435	1.66033	1.52973e-30	2.37182e-29
323	Ube2m	13.8426	0.849106	6.45344e-32	1.11054e-30
324	Bin1	13.8408	0.593336	1.16983e-31	1.98196e-30
325	Bcl7b	13.8393	2.87018	1.48808e-31	2.49143e-30
326	Eya1	13.8338	1.94015	1.6852e-31	2.80211e-30
327	Pa2g4	13.8214	2.89695	7.74889e-32	1.32337e-30
328	Prpf6	13.8179	2.98238	9.38973e-32	1.60039e-30
329	Mapre1	13.797	1.11178	1.37213e-31	2.30182e-30
330	Psen2	13.7818	2.9668	2.31479e-31	3.82299e-30
331	Klf7	13.7596	2.85772	1.12727e-31	1.91366e-30
332	Zranb1	13.7572	1.08615	3.21819e-31	5.22389e-30
333	Myo18a	13.7422	1.08667	3.81478e-31	6.1688e-30
334	Igf1r	13.7391	2.95324	1.57549e-31	2.62745e-30
335	Washc2	13.7158	2.77731	1.68679e-31	2.80211e-30
336	Atf6	13.6891	3.02266	4.76086e-31	7.62632e-30
337	Klf6	13.6814	1.84062	2.73076e-31	4.46671e-30
338	Fam219a	13.6766	3.04097	2.39262e-31	3.93001e-30
339	Comt	13.6756	2.77088	2.39342e-31	3.93001e-30
340	2610507B11Rik	13.666	1.13496	8.39015e-31	1.32164e-29
341	Ndufc1	13.6657	0.348006	3.20324e-31	5.20955e-30
342	Ppp2ca	13.6558	0.686791	3.22743e-31	5.22893e-30
343	Fam214a	13.6272	2.98747	2.94063e-31	4.80078e-30
344	Smad5	13.6004	2.8806	6.43436e-31	1.02302e-29
345	Gpx4	13.5937	0.721227	4.04456e-31	6.51564e-30
346	Clcn3	13.589	1.57684	2.44351e-30	3.72515e-29
347	Cenpb	13.5769	1.01834	2.485e-30	3.78164e-29
348	mt-Rnr1	13.5757	0.805434	4.78893e-31	7.65689e-30
349	Eif2s2	13.5746	0.767027	4.60482e-31	7.39026e-30
350	Akt1	13.5719	1.06432	6.18754e-31	9.85611e-30
351	Arrb1	13.5444	3.0334	1.53833e-30	2.37924e-29
352	Plin3	13.5292	1.70613	1.22675e-30	1.91122e-29
353	Cnep1r1	13.5234	2.8902	6.59704e-31	1.04693e-29
354	Rgmb	13.5006	0.928159	7.65459e-31	1.20801e-29
355	Id1	13.4999	1.68151	3.37866e-27	4.36256e-26
356	Map2k7	13.4815	0.938261	1.91758e-30	2.93915e-29
357	Cox8a	13.4507	0.754445	1.20472e-30	1.88033e-29
358	Mmrn2	13.4323	1.62982	3.18445e-30	4.80316e-29
359	Helz	13.4054	3.02791	2.43163e-30	3.71369e-29
360	Clip1	13.3635	1.01811	1.87297e-29	2.69164e-28
361	Suz12	13.3487	2.71666	2.70198e-30	4.10451e-29
362	Nemf	13.3248	2.71251	9.98899e-30	1.47277e-28
363	Tlk2	13.3189	1.09561	5.40509e-30	8.08109e-29
364	Gigyf1	13.2949	2.81776	3.51126e-30	5.28675e-29
365	Rabggtb	13.2553	0.802873	1.32851e-29	1.92872e-28
366	Lrrc47	13.2463	2.70816	9.09817e-30	1.34609e-28
367	Hmga1b	13.2323	2.45351	1.56502e-28	2.14423e-27
368	Xrcc1	13.2133	2.75914	6.50385e-30	9.70679e-29
369	Aars	13.202	1.1073	1.01241e-29	1.49012e-28
370	Pcbp1	13.155	0.805313	1.43095e-29	2.0739e-28
371	Cnot1	13.1409	1.59339	8.73286e-29	1.2101e-27
372	Cep170	13.1388	2.82912	1.16325e-29	1.70038e-28
373	Bnip3	13.1065	0.667832	3.83021e-29	5.41311e-28
374	Psmd7	13.105	0.84464	1.58281e-29	2.28622e-28
375	Rpa1	13.101	2.68947	1.75166e-29	2.52156e-28
376	Actn3	13.0992	0.605961	1.48411e-28	2.03665e-27
377	Lrrc8a	13.0938	1.91842	1.58955e-29	2.29208e-28
378	Usp34	13.0731	0.928405	1.98004e-29	2.84072e-28
379	Rbfox1	13.0472	1.32363	2.84226e-29	4.04369e-28
380	Lamtor3	13.0355	0.899891	2.52059e-29	3.59806e-28
381	Ddx24	13.0194	1.60926	5.19061e-29	7.2994e-28
382	Clasp2	13.0192	2.79978	2.7763e-29	3.95646e-28
383	Ube2c	13.0131	1.59072	2.97784e-29	4.22952e-28
384	Ubr4	13.012	1.0756	5.86687e-29	8.18289e-28
385	Pias1	12.9899	2.68246	4.07389e-29	5.74797e-28
386	Ankrd33b	12.9833	2.68932	3.62766e-29	5.13537e-28
387	Slc16a3	12.9712	0.800331	6.07388e-29	8.45778e-28
388	Pttg1	12.959	0.531047	5.55033e-29	7.7796e-28
389	Setd1b	12.9498	2.84701	5.72845e-29	8.01607e-28
390	Uba1	12.9498	0.56134	9.64862e-29	1.33483e-27
391	Rab10	12.9052	0.750978	3.06337e-28	4.15041e-27
392	Nr1h2	12.8969	2.64633	8.58553e-29	1.19163e-27
393	Gbe1	12.89	0.702957	2.09676e-28	2.86409e-27
394	Atn1	12.8468	2.70988	1.04343e-28	1.43885e-27
395	Slc38a2	12.8464	1.35223	2.69995e-27	3.50213e-26
396	Slc49a4	12.8089	1.08192	4.79994e-28	6.42152e-27
397	Foxj2	12.8039	2.69614	2.27205e-28	3.09799e-27
398	Trip12	12.7791	0.910791	2.89218e-28	3.92471e-27
399	Nipsnap2	12.7553	0.593514	2.57904e-27	3.36064e-26
400	Fzd7	12.7551	2.6394	6.1718e-28	8.23099e-27
401	Ppargc1a	12.7389	1.86661	2.33504e-28	3.17494e-27
402	Eif4g2	12.7318	0.445711	5.76939e-28	7.70638e-27
403	Rhot2	12.7272	0.894862	4.0848e-28	5.49931e-27
404	Lrrc20	12.7231	0.835721	3.86544e-28	5.21223e-27
405	Clint1	12.7124	1.19438	4.47447e-28	6.00495e-27
406	Mapre2	12.6872	1.00229	4.55598e-28	6.10473e-27
407	Fam199x	12.6738	2.60029	3.6602e-28	4.95114e-27
408	Kmt2d	12.6665	2.79012	3.86065e-28	5.21223e-27
409	Picalm	12.6287	1.49268	3.31293e-27	4.28419e-26
410	Ryr1	12.6248	0.679948	7.04129e-28	9.36129e-27
411	Pdgfa	12.6206	2.63843	9.34664e-28	1.24069e-26
412	Mapk6	12.6202	1.22121	1.25607e-27	1.65957e-26
413	Glrx5	12.6111	0.812713	1.14041e-27	1.51144e-26
414	Ypel3	12.5968	0.870849	6.49495e-28	8.64844e-27
415	Cdc37l1	12.5511	2.57584	1.65832e-27	2.17419e-26
416	Timp3	12.5469	0.979011	4.41672e-26	5.30879e-25
417	Mybpc2	12.5435	0.491697	2.15114e-27	2.81598e-26
418	Rrp12	12.5361	1.74217	4.21656e-27	5.38734e-26
419	Mcrip2	12.5072	1.50309	1.36895e-27	1.80591e-26
420	Rtf1	12.5039	2.58405	3.94954e-27	5.05375e-26
421	Emd	12.4935	0.675243	1.40707e-27	1.85333e-26
422	Gtpbp2	12.4881	2.10528	1.46781e-27	1.93035e-26
423	Foxn3	12.4786	0.643106	1.62007e-27	2.1273e-26
424	Cltc	12.4715	0.887945	3.6287e-27	4.65719e-26
425	Herc4	12.4645	2.627	2.24555e-27	2.93506e-26
426	Camk2a	12.4561	1.078	3.96356e-26	4.79793e-25
427	Ube2r2	12.4289	0.724861	1.13645e-26	1.40563e-25
428	Slc8a1	12.427	2.57699	2.39674e-27	3.12787e-26
429	Epn1	12.421	0.686789	2.6108e-27	3.39166e-26
430	Ddi2	12.421	1.45217	2.87685e-27	3.72592e-26
431	Akap9	12.417	2.57353	1.04557e-26	1.29888e-25
432	Atf7ip	12.4135	2.71193	2.58479e-27	3.36299e-26
433	Fkbp4	12.402	0.631625	1.4748e-26	1.81098e-25
434	Rbbp5	12.3919	1.50367	1.54678e-25	1.80323e-24
435	Akt1s1	12.3911	1.23377	1.13295e-26	1.40335e-25
436	Dctn4	12.3875	2.59255	3.79928e-27	4.86879e-26
437	Zer1	12.3867	2.56048	6.56935e-27	8.31857e-26
438	Yap1	12.3774	2.69302	5.76664e-27	7.33482e-26
439	Map3k3	12.3761	2.69895	3.43472e-27	4.42156e-26
440	Sphk2	12.3746	2.59152	3.3848e-27	4.36389e-26
441	Malsu1	12.3707	0.547086	3.49643e-27	4.4942e-26
442	Setd7	12.3626	1.03952	2.40951e-26	2.93341e-25
443	Plec	12.3482	0.837151	1.29175e-25	1.50799e-24
444	Tmem268	12.3297	2.62944	5.98313e-27	7.59885e-26
445	Mta1	12.3256	2.51423	9.11927e-27	1.14118e-25
446	Nploc4	12.324	1.20707	6.63955e-27	8.38256e-26
447	Dnajb9	12.3083	1.45524	9.19875e-27	1.14944e-25
448	Kdm5c	12.3035	2.55693	7.88231e-27	9.90753e-26
449	Snta1	12.3026	0.865017	1.01393e-26	1.26326e-25
450	Samhd1	12.2941	2.66702	6.45307e-27	8.18349e-26
451	Rab7	12.2838	0.686662	1.25406e-26	1.54885e-25
452	Daxx	12.2803	2.70346	7.25606e-27	9.13385e-26
453	Sorbs1	12.2758	2.67515	9.58856e-27	1.19639e-25
454	Fnip1	12.2716	2.51235	1.01604e-26	1.26405e-25
455	Wdr11	12.236	2.59759	1.27642e-26	1.57419e-25
456	Usp13	12.2144	0.925118	1.11286e-26	1.38047e-25
457	D8Ertd738e	12.1968	0.652249	1.29625e-26	1.59634e-25
458	Tstd2	12.181	2.56065	1.59326e-26	1.95363e-25
459	Fam168a	12.1765	2.61771	1.4703e-26	1.80806e-25
460	Arid1a	12.1619	1.53018	4.94818e-26	5.92252e-25
461	Mt1	12.1613	3.0808	4.29527e-25	4.88709e-24
462	Bfar	12.1579	1.12449	1.69109e-26	2.07062e-25
463	Pde7a	12.1522	1.73439	1.7693e-26	2.16327e-25
464	Bcam	12.1436	0.717373	1.91095e-26	2.33312e-25
465	Cpox	12.1313	1.91232	2.1177e-26	2.58184e-25
466	Taok2	12.1058	1.86261	4.63642e-26	5.55719e-25
467	Pgam5	12.1002	2.53634	4.15651e-26	5.01725e-25
468	Tfb2m	12.0798	2.55302	3.16319e-26	3.83998e-25
469	Dcaf13	12.059	2.68629	5.66293e-26	6.73075e-25
470	Camsap1	12.0556	1.34773	3.62282e-26	4.3917e-25
471	Nsfl1c	12.0525	1.40044	2.14455e-25	2.4899e-24
472	Msrb3	12.0482	0.806268	5.08467e-26	6.06884e-25
473	Ar	12.0406	2.54283	8.63751e-26	1.0181e-24
474	Ybx3	12.0401	0.553726	4.52668e-26	5.43329e-25
475	Cox6a2	12.0324	0.343789	4.29591e-26	5.17818e-25
476	Scn1b	12.0287	0.472185	4.38902e-26	5.28294e-25
477	Llph	12.0269	2.43143	5.60719e-26	6.67381e-25
478	Phf3	12.0184	2.59756	5.16743e-26	6.15899e-25
479	Utp4	12.0119	2.67428	5.03003e-26	6.01205e-25
480	Lamtor1	12.0047	0.46044	6.7108e-26	7.95402e-25
481	Mpp1	11.9772	2.55611	7.72576e-26	9.11897e-25
482	Gpatch4	11.973	2.66525	7.54554e-26	8.9186e-25
483	Ythdf1	11.9651	0.917938	2.92776e-25	3.3808e-24
484	Mbd1	11.9613	2.66185	7.23591e-26	8.5645e-25
485	Lmna	11.9362	1.10229	8.98442e-26	1.05753e-24
486	Vapa	11.9329	0.672583	9.72554e-26	1.14161e-24
487	Wbp2	11.9236	0.815145	9.66932e-26	1.13658e-24
488	Smarca2	11.911	0.550882	1.16502e-25	1.36565e-24
489	Spsb3	11.9027	2.59414	1.21185e-25	1.41665e-24
490	G3bp1	11.8867	1.0505	1.95981e-25	2.27851e-24
491	Rxra	11.8502	0.958764	3.0537e-25	3.5167e-24
492	8030462N17Rik	11.8425	2.52326	1.73885e-25	2.02438e-24
493	Nsrp1	11.8392	2.74615	2.3555e-25	2.7311e-24
494	Ddx46	11.8362	2.46671	4.28923e-25	4.88674e-24
495	Nrbp1	11.8066	1.10777	3.21809e-25	3.69604e-24
496	Clstn1	11.8044	2.6331	2.53517e-25	2.93542e-24
497	Atp6v1b2	11.7906	1.00023	3.72259e-25	4.26971e-24
498	Rbm3	11.7892	1.02127	2.58932e-25	2.99406e-24
499	Rnf6	11.7846	2.8533	3.96067e-25	4.53059e-24
500	Amotl1	11.7777	0.970087	8.12924e-24	8.62732e-23
501	Ttc14	11.7695	2.65007	3.07648e-25	3.53817e-24
502	Scaf11	11.7676	1.76738	3.00006e-25	3.45961e-24
503	Ppp6r1	11.7521	2.49152	5.01836e-25	5.6946e-24
504	Lamp1	11.7444	0.556463	5.34833e-25	6.06097e-24
505	Aftph	11.7438	2.4709	3.82412e-25	4.38026e-24
506	Thoc5	11.7378	2.53832	4.0297e-25	4.60337e-24
507	Cped1	11.7353	2.57267	4.21037e-25	4.80331e-24
508	Flcn	11.7136	1.43049	1.13596e-24	1.26876e-23
509	Pnpla8	11.7094	0.704685	4.64284e-25	5.27551e-24
510	Hsp90aa1	11.7045	1.485	5.9261e-25	6.68019e-24
511	Dazap1	11.6973	2.61978	5.5376e-25	6.25881e-24
512	Pcmtd1	11.6972	0.63646	1.11765e-24	1.25159e-23
513	Tmf1	11.6884	2.52302	5.36838e-25	6.07561e-24
514	Mthfd1	11.6825	2.55686	5.63146e-25	6.35646e-24
515	Mat2a	11.675	1.18725	1.45937e-24	1.6236e-23
516	Tia1	11.6666	2.46847	6.39346e-25	7.19749e-24
517	Atxn7l3b	11.6647	2.42006	5.34495e-24	5.75849e-23
518	Sppl2a	11.653	0.934592	1.66416e-24	1.84661e-23
519	Mrps21	11.6485	0.55412	7.27801e-25	8.18248e-24
520	Zmiz2	11.6196	2.47185	2.04994e-24	2.25705e-23
521	Lrrc58	11.6127	1.69955	7.27065e-24	7.76447e-23
522	Smarcc2	11.6039	1.32965	1.15598e-24	1.28944e-23
523	Pura	11.6019	2.44837	2.61389e-24	2.86318e-23
524	Cops7a	11.5995	2.42141	2.78389e-24	3.03768e-23
525	Brd3	11.5985	2.55295	1.09346e-24	1.22611e-23
526	Mapre3	11.5968	0.905336	1.1332e-24	1.26734e-23
527	Pnrc1	11.5893	1.3872	1.28479e-24	1.43124e-23
528	Fndc3b	11.5756	2.75998	3.29885e-24	3.58582e-23
529	Mcmbp	11.5698	1.60105	6.8897e-24	7.36688e-23
530	Mospd1	11.5574	1.03844	1.60654e-24	1.785e-23
531	Herc1	11.5514	2.39935	2.85578e-24	3.11214e-23
532	Dlgap4	11.5463	2.45135	2.56388e-24	2.81202e-23
533	Fxr1	11.5429	0.506394	2.6548e-24	2.90426e-23
534	Pbx1	11.5416	1.36521	1.88683e-24	2.08825e-23
535	Cdc42	11.515	0.457528	1.9203e-24	2.12254e-23
536	Cdc73	11.5138	1.18537	6.83315e-24	7.31559e-23
537	Eif4ebp2	11.5102	0.874234	1.97917e-24	2.18478e-23
538	Nr4a1	11.498	1.64423	2.73108e-24	2.98388e-23
539	Ggnbp2	11.4883	1.80512	5.498e-24	5.9159e-23
540	Serinc3	11.4726	0.6979	2.9178e-24	3.17566e-23
541	Acyp2	11.4595	0.98863	5.31663e-24	5.73523e-23
542	Myom2	11.4298	0.836433	1.39206e-23	1.45381e-22
543	Ank	11.4197	0.782304	2.66812e-23	2.74611e-22
544	Paics	11.4178	0.617297	9.10185e-24	9.62357e-23
545	Mia2	11.4002	1.54157	4.42201e-24	4.79445e-23
546	Xirp2	11.3999	0.46268	5.81217e-24	6.24607e-23
547	Egln3	11.3958	1.80738	5.17042e-24	5.59167e-23
548	Arfgap1	11.393	2.53922	5.8704e-24	6.3007e-23
549	Ugp2	11.3794	0.489619	1.53675e-23	1.60296e-22
550	Mob4	11.3777	0.997121	5.24406e-24	5.66411e-23
551	Ndufa10	11.3718	0.880876	2.06723e-23	2.14318e-22
552	Fry	11.3702	2.45948	6.447e-24	6.91086e-23
553	Naa20	11.3647	1.31514	7.32571e-24	7.81348e-23
554	Snx15	11.357	2.58088	8.09151e-24	8.59798e-23
555	Sars2	11.3544	1.31235	1.21368e-23	1.27534e-22
556	Trappc3	11.3519	2.60842	9.4549e-24	9.98447e-23
557	Gapvd1	11.341	1.25626	1.28662e-23	1.34832e-22
558	Zfp358	11.3172	1.12385	1.23765e-23	1.29892e-22
559	Uggt1	11.315	2.45158	8.81424e-24	9.34266e-23
560	Cog1	11.3045	2.53499	8.8933e-24	9.41475e-23
561	Macrod1	11.2866	0.573719	1.1026e-23	1.16148e-22
562	Ubr2	11.2678	1.3127	1.28788e-23	1.34832e-22
563	Rsrp1	11.2598	1.35164	4.80839e-23	4.88404e-22
564	Arhgap23	11.2586	2.56501	1.71471e-23	1.78422e-22
565	Dnajb12	11.2581	2.34276	2.05327e-23	2.1313e-22
566	Cct2	11.2522	0.972354	5.63347e-23	5.71529e-22
567	Cacng6	11.248	0.836025	1.33832e-23	1.3994e-22
568	Prkar1a	11.2436	1.16042	4.0905e-23	4.16977e-22
569	Yars	11.2305	2.40216	2.03157e-23	2.11135e-22
570	Hdac4	11.2069	1.47174	6.05268e-23	6.126e-22
571	Ndufaf4	11.1915	0.847015	3.98605e-23	4.07303e-22
572	Gtf3c2	11.1874	2.52504	2.5052e-23	2.58153e-22
573	Nmt1	11.1638	2.48413	2.72978e-23	2.80617e-22
574	Lin7c	11.1519	2.36243	3.48274e-23	3.57159e-22
575	Phf2	11.1383	1.21549	9.21731e-23	9.27389e-22
576	Sltm	11.1381	2.66127	7.98093e-23	8.04893e-22
577	Net1	11.1373	2.86065	9.34114e-23	9.3874e-22
578	Cebpd	11.1304	31.8383	5.09547e-20	4.50452e-19
579	Polr2m	11.1257	0.542354	3.60601e-23	3.68912e-22
580	Mybpc1	11.1231	0.461947	4.04595e-23	4.12929e-22
581	Jmy	11.1167	2.50482	3.53412e-23	3.61993e-22
582	Zmynd11	11.1018	0.890499	1.9428e-22	1.93643e-21
583	Errfi1	11.0883	2.34071	5.7331e-23	5.80945e-22
584	Mlxipl	11.0855	2.37435	7.66741e-23	7.74191e-22
585	Acvr1	11.085	2.43382	4.48798e-23	4.56948e-22
586	Usp1	11.0499	2.34038	8.05152e-23	8.11053e-22
587	Ifi30	11.0327	31.7628	8.65849e-20	7.55247e-19
588	Cebpg	11.0302	1.11583	6.50585e-23	6.57685e-22
589	Hsp90b1	11.0264	0.909699	1.29536e-22	1.29415e-21
590	Pik3ca	11.0057	0.956177	4.34865e-22	4.26949e-21
591	Gdi2	10.9915	0.643628	1.03697e-22	1.03966e-21
592	Ikzf2	10.9887	2.67221	2.09012e-22	2.07357e-21
593	Shisa2	10.9632	2.38292	1.05488e-22	1.05636e-21
594	Rnps1	10.9599	0.710583	1.07955e-22	1.0798e-21
595	Hoxc10	10.9596	0.650394	1.6173e-22	1.61389e-21
596	Fam50a	10.9593	1.43179	2.37585e-22	2.35157e-21
597	Plin5	10.9591	31.3495	1.29067e-19	1.11553e-18
598	Zfp106	10.9557	0.741232	2.25818e-21	2.11941e-20
599	Agt	10.9384	31.3148	1.44407e-19	1.24432e-18
600	Tmod1	10.9339	0.88269	5.30335e-22	5.17699e-21
601	Car14	10.8906	1.48748	1.95607e-22	1.94739e-21
602	Atg12	10.8735	2.42881	2.06145e-22	2.0499e-21
603	Rprd1b	10.8633	2.41494	2.18307e-22	2.16327e-21
604	Cops6	10.8603	0.660833	2.43936e-22	2.41162e-21
605	Arf1	10.8525	0.529583	3.50555e-22	3.4457e-21
606	Mcf2l	10.8501	2.69218	6.29672e-22	6.12565e-21
607	Erc1	10.847	2.43387	2.44345e-22	2.41287e-21
608	Gadd45a	10.8385	30.6533	2.48433e-19	2.10661e-18
609	Rpf2	10.8344	1.00447	3.40531e-21	3.17159e-20
610	Ppp1r12a	10.8221	2.56291	4.51957e-22	4.4322e-21
611	Klhl41	10.8165	0.382572	3.19251e-22	3.1489e-21
612	Ctla2a	10.8143	30.8626	2.83338e-19	2.3907e-18
613	Elp2	10.8076	0.942196	1.89926e-21	1.79839e-20
614	Tgm2	10.8066	0.999638	3.28207e-22	3.23351e-21
615	Wnk2	10.8048	1.55517	3.31218e-22	3.2594e-21
616	Bod1	10.7927	0.597334	6.94251e-22	6.73851e-21
617	Fkbp5	10.7839	30.8219	3.34192e-19	2.8059e-18
618	Mlf1	10.7736	0.56269	7.78695e-22	7.54953e-21
619	Trappc9	10.7623	1.00808	5.11487e-22	4.99873e-21
620	Nfib	10.762	0.715271	4.65288e-22	4.55768e-21
621	Bloc1s6	10.7487	2.32108	5.85086e-22	5.70493e-21
622	Flnc	10.7385	0.790991	5.99201e-22	5.83588e-21
623	Cep85l	10.7242	31.0404	4.62109e-19	3.85332e-18
624	Gtf3a	10.7184	1.62465	8.11824e-22	7.85286e-21
625	Depp1	10.7084	31.1232	5.03526e-19	4.19048e-18
626	Sdad1	10.7067	1.55115	6.7462e-22	6.55543e-21
627	Oxct1	10.7016	0.557444	8.36103e-22	8.06938e-21
628	Repin1	10.6954	2.3675	1.0254e-21	9.85165e-21
629	Trpc4ap	10.6933	0.880713	1.17106e-21	1.11881e-20
630	Farsa	10.6881	2.25987	9.04099e-22	8.70591e-21
631	Dynll2	10.688	0.555867	1.06957e-21	1.02645e-20
632	Creb3	10.6833	2.23692	1.12583e-21	1.0768e-20
633	Mmut	10.6822	1.34771	1.07466e-21	1.03018e-20
634	Slc12a6	10.6796	0.969427	8.09239e-22	7.83674e-21
635	Stard7	10.6767	0.92304	8.31654e-22	8.03555e-21
636	Ubap2l	10.6695	1.2976	3.93819e-21	3.65193e-20
637	Prkacb	10.6637	1.01325	9.07044e-22	8.72442e-21
638	Emc3	10.653	2.24634	1.55729e-21	1.47951e-20
639	Serbp1	10.6412	0.626657	1.37963e-21	1.31512e-20
640	Jun	10.6375	2.46851	1.09862e-21	1.05196e-20
641	Hbp1	10.6336	0.700256	2.1526e-21	2.02477e-20
642	Gatad2a	10.6245	1.08775	1.20465e-21	1.14961e-20
643	Tmem135	10.6058	2.35012	1.57101e-21	1.49089e-20
644	Mcoln1	10.5969	2.38382	1.46737e-21	1.3972e-20
645	Slc25a34	10.5942	31.0005	9.36108e-19	7.67807e-18
646	Gpcpd1	10.5939	0.6161	1.49087e-21	1.41799e-20
647	Polr2a	10.5926	2.36709	2.36018e-21	2.2127e-20
648	Nrip1	10.5877	1.49192	1.63815e-21	1.55287e-20
649	Pik3ip1	10.5832	2.42772	2.00138e-21	1.89088e-20
650	Pwwp3a	10.563	2.43104	1.96411e-21	1.85773e-20
651	Dctn1	10.5574	0.915805	6.35961e-21	5.85276e-20
652	Irs2	10.5459	2.4083	2.17604e-21	2.04456e-20
653	Tet3	10.5459	2.47495	2.10208e-21	1.97944e-20
654	Atp1a1	10.5437	1.35692	2.81008e-21	2.6287e-20
655	Pip4k2b	10.5266	0.782206	2.4173e-21	2.26376e-20
656	Tgif1	10.5251	30.9063	1.36226e-18	1.11092e-17
657	Plin4	10.521	1.55142	2.90423e-21	2.71083e-20
658	Brwd1	10.5107	2.33242	2.856e-21	2.66873e-20
659	Nudt22	10.5062	2.54743	3.7443e-21	3.47592e-20
660	Ascc1	10.5011	1.28767	3.53899e-21	3.2889e-20
661	Rbm42	10.4991	2.07851	1.54961e-20	1.40786e-19
662	Hnrnpdl	10.4931	0.688871	1.72316e-20	1.55724e-19
663	Tfeb	10.4872	2.23506	3.42541e-21	3.18683e-20
664	Map3k20	10.4829	0.680034	3.28797e-21	3.06565e-20
665	Lrg1	10.4812	1.86749	4.02853e-21	3.73164e-20
666	Smarcal1	10.4504	2.3285	4.14602e-21	3.83631e-20
667	Cpeb1	10.4452	2.2917	5.28537e-21	4.87467e-20
668	Puf60	10.4301	0.567984	4.94903e-21	4.57437e-20
669	Fh1	10.4255	0.662938	5.0911e-21	4.70058e-20
670	Fubp1	10.4032	1.55935	6.15231e-21	5.66811e-20
671	Dym	10.395	0.845857	8.66657e-21	7.93303e-20
672	Pygm	10.3891	0.40132	3.38009e-20	3.00994e-19
673	Atp6ap2	10.374	1.02131	7.30189e-21	6.7127e-20
674	Pcx	10.3709	2.45301	7.69911e-21	7.06263e-20
675	Acads	10.3706	2.3546	7.36559e-21	6.76396e-20
676	Gsk3b	10.3689	1.50447	2.55455e-20	2.28915e-19
677	Kmt5a	10.3613	1.25652	1.68938e-20	1.52833e-19
678	Pdcd6ip	10.3411	2.26569	9.33891e-21	8.53929e-20
679	Nrbf2	10.3348	30.192	3.82927e-18	3.05267e-17
680	Odr4	10.3293	2.41972	1.11552e-20	1.01673e-19
681	Kpna1	10.3228	0.723498	1.11139e-20	1.01406e-19
682	Sik3	10.3211	2.3233	1.05239e-20	9.61248e-20
683	Paox	10.3211	30.4461	4.12544e-18	3.2857e-17
684	Nr4a3	10.2973	30.5584	4.69451e-18	3.72154e-17
685	Dlat	10.2894	0.715608	7.0247e-20	6.17529e-19
686	Itgav	10.2783	2.41974	1.61054e-20	1.46011e-19
687	Nol6	10.2713	2.47043	1.68046e-20	1.52187e-19
688	Crebrf	10.268	30.4218	5.50387e-18	4.35911e-17
689	Tollip	10.2643	2.47469	2.75069e-20	2.46233e-19
690	Arrdc2	10.2595	30.5478	5.76357e-18	4.5521e-17
691	Ttc3	10.2479	1.64163	1.74701e-20	1.57712e-19
692	Kif5b	10.2304	0.981883	2.26425e-20	2.03115e-19
693	Micos13	10.23	2.34276	2.09257e-20	1.88111e-19
694	Prkar2a	10.2213	0.659997	3.57459e-20	3.17982e-19
695	Rnasek	10.2213	0.998761	2.15596e-20	1.93605e-19
696	Rnf10	10.2207	0.642428	3.24667e-20	2.89415e-19
697	Dennd4b	10.2031	0.807564	1.2855e-19	1.11219e-18
698	Srp68	10.1801	0.866243	2.85751e-20	2.55527e-19
699	Atp5h	10.1769	0.345757	3.00097e-20	2.68074e-19
700	Wdr5	10.1697	2.32462	3.13915e-20	2.80124e-19
701	Bach1	10.1603	30.2662	9.87346e-18	7.67016e-17
702	Lpcat3	10.1484	2.48674	4.88464e-20	4.32712e-19
703	Pip5k1a	10.147	2.35854	3.60184e-20	3.20072e-19
704	Fam122a	10.1398	1.25002	5.47383e-20	4.83399e-19
705	Srp72	10.1309	2.24475	3.99276e-20	3.54441e-19
706	Thrap3	10.1219	1.24636	4.45515e-20	3.95076e-19
707	Hspa5	10.1219	0.804742	1.2208e-19	1.05836e-18
708	Ndufaf1	10.1157	0.909973	2.3956e-19	2.03746e-18
709	Ube2s	10.107	29.7256	1.31813e-17	1.01565e-16
710	Pim3	10.0977	30.4739	1.38674e-17	1.06658e-16
711	Pwp1	10.0971	2.27982	5.07085e-20	4.48741e-19
712	AC159819.1	10.0938	29.6929	1.41611e-17	1.08721e-16
713	Spsb1	10.0807	30.4343	1.52022e-17	1.16295e-16
714	Myoz3	10.073	0.668961	7.0289e-20	6.17529e-19
715	Nub1	10.0693	2.37804	6.77768e-20	5.96688e-19
716	Eya4	10.0653	2.26082	6.29492e-20	5.55335e-19
717	Pdhb	10.0633	0.439363	6.39345e-20	5.63444e-19
718	Keap1	10.0589	1.42356	1.07701e-19	9.35603e-19
719	Maco1	10.0453	1.25125	7.25638e-20	6.36857e-19
720	Ddb1	10.0431	2.30227	7.53201e-20	6.5969e-19
721	Khsrp	10.0348	1.50902	7.87163e-20	6.88728e-19
722	Tubb6	10.0341	30.3709	1.95785e-17	1.48971e-16
723	Mpp5	10.0308	1.21821	1.88166e-19	1.60999e-18
724	Ablim1	10.0292	2.18802	8.30126e-20	7.25573e-19
725	Esf1	10.0231	30.4804	2.07763e-17	1.57803e-16
726	Phf21a	10.0214	2.26479	8.80384e-20	7.67141e-19
727	Macroh2a1	10.012	0.952251	5.11451e-19	4.25228e-18
728	A930016O22Rik	10.0103	0.987659	1.25764e-19	1.08919e-18
729	Nctc1	10.002	1.07552	5.32318e-19	4.42146e-18
730	D230025D16Rik	9.9975	2.32894	1.01403e-19	8.81789e-19
731	Fbp2	9.99715	2.2643	1.34143e-19	1.15822e-18
732	U2surp	9.99105	0.978208	1.50966e-19	1.29953e-18
733	Usp19	9.96877	1.17757	2.98804e-19	2.5187e-18
734	Ssb	9.95652	0.856699	2.50737e-19	2.11982e-18
735	Crkl	9.95593	29.9706	2.9912e-17	2.25984e-16
736	Adam9	9.95556	30.2416	2.99716e-17	2.26234e-16
737	Zfp36	9.95448	30.5944	3.01485e-17	2.27368e-16
738	Sdhd	9.95119	1.29453	1.40619e-19	1.21291e-18
739	Dpm2	9.94327	2.23253	1.57483e-19	1.35289e-18
740	Prr12	9.94224	1.48656	1.76031e-19	1.50919e-18
741	Map3k10	9.93601	2.31235	1.55701e-19	1.33894e-18
742	Tnpo2	9.93191	2.11814	1.91581e-19	1.63593e-18
743	Srek1	9.91472	2.2801	1.9309e-19	1.64716e-18
744	Ppp4r3b	9.91208	2.19132	1.84763e-19	1.58246e-18
745	Hnrnpu	9.90886	1.06184	1.88863e-19	1.61433e-18
746	Tmem106b	9.90818	0.727626	2.08674e-19	1.77832e-18
747	Stag1	9.90773	1.09259	3.22658e-19	2.7144e-18
748	Stx4a	9.89604	2.16039	2.41299e-19	2.0502e-18
749	Ndufs5	9.88943	0.478911	2.17832e-19	1.85451e-18
750	Bzw2	9.88492	0.769266	2.47284e-19	2.09896e-18
751	Tnni2	9.88444	0.316376	2.49492e-19	2.11349e-18
752	Rb1cc1	9.87371	1.21584	2.50607e-19	2.11982e-18
753	Zfhx3	9.8621	1.41258	2.68858e-19	2.27077e-18
754	Adamtsl5	9.85874	2.36458	3.38722e-19	2.84113e-18
755	Tmem201	9.84306	1.04075	3.07623e-19	2.59048e-18
756	Ipmk	9.83128	2.19874	3.4199e-19	2.86291e-18
757	Atp6v1h	9.82843	2.30643	3.29158e-19	2.76636e-18
758	Sec31a	9.82709	1.13511	4.15742e-19	3.47348e-18
759	Usp14	9.82449	0.636185	3.39637e-19	2.84601e-18
760	Ap3b1	9.81602	2.18002	4.01206e-19	3.35533e-18
761	Scaf1	9.81259	1.27524	5.96937e-19	4.95336e-18
762	Tln2	9.80454	2.17457	7.40339e-19	6.11353e-18
763	Gmpr	9.79327	0.384378	4.21157e-19	3.51528e-18
764	Ppp5c	9.7932	2.12128	8.40413e-19	6.9332e-18
765	Psmc4	9.78159	0.770252	9.21165e-19	7.56278e-18
766	Dennd1b	9.77442	2.27804	5.02069e-19	4.18244e-18
767	Zfand5	9.77333	0.947083	1.33101e-18	1.08648e-17
768	Chfr	9.76835	30.091	8.26354e-17	6.10771e-16
769	Pdk4	9.76605	2.34965	7.79981e-18	6.10937e-17
770	Rrs1	9.75058	30.0731	9.09806e-17	6.70706e-16
771	Mapk1ip1	9.74905	1.45841	7.19698e-19	5.94886e-18
772	Pdss2	9.74075	2.15226	6.10411e-19	5.06023e-18
773	AW549877	9.73428	2.26792	6.55063e-19	5.42512e-18
774	Ap2a1	9.72119	2.19891	6.96333e-19	5.76131e-18
775	Eif1b	9.71376	1.11889	1.89738e-18	1.53848e-17
776	Ssbp1	9.71047	0.948683	8.63046e-19	7.09931e-18
777	Wnk1	9.7039	0.762028	1.70416e-18	1.38445e-17
778	Osr2	9.70074	2.34445	8.87859e-19	7.29637e-18
779	Idh1	9.69955	1.62426	8.51857e-19	7.01403e-18
780	Ppm1g	9.69724	2.21971	8.44396e-19	6.95932e-18
781	Tns1	9.6872	0.541312	1.13687e-18	9.29788e-18
782	Tmem140	9.6869	30.3426	1.28415e-16	9.34543e-16
783	Shank3	9.67946	30.2652	1.33686e-16	9.68769e-16
784	Rfc2	9.67567	2.16432	9.90461e-19	8.10827e-18
785	Rras2	9.67426	2.26524	9.76368e-19	8.00059e-18
786	6430548M08Rik	9.6687	30.1212	1.41703e-16	1.02425e-15
787	Tomm40	9.66593	30.1929	1.43836e-16	1.03879e-15
788	Srsf1	9.65965	1.30496	3.43213e-18	2.74635e-17
789	Sesn1	9.64087	30.3847	1.64714e-16	1.1776e-15
790	Srxn1	9.63243	30.1201	1.72407e-16	1.2295e-15
791	Nisch	9.62939	1.35749	1.37196e-18	1.11776e-17
792	Yy1	9.6274	30.1227	1.77161e-16	1.26234e-15
793	Tbc1d22a	9.62129	2.25639	1.40403e-18	1.1428e-17
794	Fstl1	9.61284	1.1115	2.59931e-18	2.09568e-17
795	Csnk1e	9.60458	30.132	2.00424e-16	1.42098e-15
796	Ripor2	9.59909	30.326	2.06468e-16	1.46018e-15
797	Safb2	9.59408	30.1451	2.12135e-16	1.49777e-15
798	Zfp362	9.59244	1.29591	2.28531e-18	1.84951e-17
799	Gars	9.59041	0.792909	2.87565e-18	2.30539e-17
800	Fopnl	9.58899	0.577278	2.05167e-18	1.66201e-17
801	Anp32b	9.58348	0.856576	6.99251e-18	5.49218e-17
802	Cstf2t	9.58195	2.42624	2.53687e-18	2.04727e-17
803	Ddx3x	9.58183	0.948613	1.82235e-18	1.47905e-17
804	Lin52	9.56131	30.0339	2.53234e-16	1.78204e-15
805	Phf23	9.55634	2.27985	2.61039e-18	2.1023e-17
806	Nudcd3	9.55207	2.10174	6.98292e-18	5.48971e-17
807	Wapl	9.54646	1.00156	2.41104e-18	1.94757e-17
808	Ist1	9.54605	2.21281	2.33164e-18	1.88522e-17
809	Nt5c3	9.54257	0.512454	2.61246e-18	2.1023e-17
810	Klc2	9.53849	2.29912	2.69732e-18	2.16854e-17
811	Celsr2	9.52929	2.31045	2.82918e-18	2.27027e-17
812	Fip1l1	9.52918	29.9745	3.01242e-16	2.11291e-15
813	Ahnak	9.52871	0.734154	3.50824e-18	2.80462e-17
814	Serpine1	9.52266	30.3238	3.12034e-16	2.18681e-15
815	Ttc38	9.51585	29.9734	3.23722e-16	2.25943e-15
816	Sympk	9.51027	0.996807	3.62146e-18	2.89242e-17
817	Gda	9.50466	30.1077	3.4389e-16	2.39822e-15
818	Sbno1	9.49833	1.19109	4.4633e-18	3.54816e-17
819	Lrrc30	9.49579	0.595584	3.28772e-18	2.63327e-17
820	Sec14l1	9.48467	1.2145	4.23894e-18	3.37294e-17
821	Mxd4	9.47768	2.19211	3.72151e-18	2.96954e-17
822	Fxr2	9.46803	1.12544	4.51977e-18	3.5897e-17
823	Phtf2	9.46216	0.67333	7.47186e-18	5.85788e-17
824	Arnt	9.46182	30.1931	4.33379e-16	2.99291e-15
825	Lcn2	9.45858	30.2026	4.41035e-16	3.04086e-15
826	Gzf1	9.45531	29.9145	4.48883e-16	3.08997e-15
827	Idnk	9.44874	30.1909	4.65087e-16	3.19635e-15
828	Txn1	9.44699	0.517939	4.58612e-18	3.639e-17
829	Btg2	9.44028	30.0318	4.86798e-16	3.33749e-15
830	Pygo2	9.42226	30.0001	5.36515e-16	3.66655e-15
831	Tcf7l1	9.42115	2.29666	5.68668e-18	4.49554e-17
832	Psmb4	9.42051	0.578333	5.61878e-18	4.44598e-17
833	Susd6	9.42006	29.988	5.42917e-16	3.70733e-15
834	Tmx1	9.40875	1.09167	6.44379e-18	5.07993e-17
835	Asb3	9.40539	30.0479	5.87651e-16	3.99678e-15
836	Tsc22d2	9.39775	29.9823	6.12356e-16	4.15817e-15
837	Nek7	9.39486	0.545898	7.8981e-18	6.18068e-17
838	Phka1	9.39135	0.451277	8.16214e-18	6.3756e-17
839	Armc1	9.38955	1.30772	6.81373e-18	5.36165e-17
840	Mapk1ip1l	9.38332	29.9968	6.61922e-16	4.48759e-15
841	Samd4	9.38238	1.2709	1.04735e-17	8.12885e-17
842	Klhdc2	9.37615	0.506727	7.43739e-18	5.83623e-17
843	Prmt1	9.36666	0.827329	7.97093e-18	6.23195e-17
844	Phlda3	9.36242	0.972825	8.17245e-18	6.37781e-17
845	Atp11b	9.36179	30.028	7.4342e-16	5.02413e-15
846	Plekhm2	9.3603	30.089	7.49412e-16	5.0566e-15
847	Adipor1	9.35464	0.346765	9.21405e-18	7.1841e-17
848	Nolc1	9.35201	30.1556	7.83639e-16	5.27919e-15
849	Hspa9	9.34984	0.544502	9.65928e-18	7.51062e-17
850	Inppl1	9.34822	2.09674	9.42823e-18	7.33766e-17
851	Pdp2	9.3459	30.2794	8.09891e-16	5.45173e-15
852	Las1l	9.32442	0.93228	1.76666e-17	1.34906e-16
853	Pkm	9.31714	0.391728	1.11284e-17	8.62149e-17
854	Tox4	9.31484	1.14391	3.96743e-17	2.98415e-16
855	Psmc5	9.30668	0.58816	1.33141e-17	1.02495e-16
856	Mrps23	9.30366	0.641799	1.25621e-17	9.70574e-17
857	Zc3h11a	9.30155	0.926161	2.52376e-17	1.91178e-16
858	Clptm1	9.30004	0.711804	1.44268e-17	1.10662e-16
859	Txn2	9.29977	0.482973	1.45819e-17	1.11751e-16
860	Phf5a	9.29871	0.992119	1.30443e-17	1.006e-16
861	Psmd8	9.29728	0.590115	1.30363e-17	1.006e-16
862	Inpp5e	9.29262	30.0832	1.07921e-15	7.23039e-15
863	Vamp2	9.28917	1.13448	1.66435e-17	1.27207e-16
864	Arpc1b	9.28752	29.8815	1.10926e-15	7.41418e-15
865	Adrm1	9.28299	0.946764	1.8063e-17	1.37809e-16
866	Pim1	9.28237	30.0542	1.14047e-15	7.61398e-15
867	Tmem189	9.282	29.8215	1.14274e-15	7.62007e-15
868	Etnk1	9.27398	2.15417	1.50325e-17	1.15101e-16
869	Ncapd2	9.27089	29.9104	1.21323e-15	8.06374e-15
870	Arhgap24	9.27077	29.8849	1.21401e-15	8.06374e-15
871	Capzb	9.26673	0.30804	1.94949e-17	1.48468e-16
872	Tcerg1	9.26114	29.8908	1.27858e-15	8.48606e-15
873	Cdk16	9.25965	0.827473	3.54289e-17	2.66954e-16
874	Ccdc50	9.25768	0.759481	2.25157e-17	1.70862e-16
875	Adcy2	9.25687	1.09053	2.44181e-17	1.85134e-16
876	Rab14	9.25265	1.00951	1.94823e-17	1.48468e-16
877	Gfpt1	9.24133	2.08478	2.63476e-17	1.99409e-16
878	Ehbp1l1	9.23085	0.697865	5.86873e-17	4.37945e-16
879	Pptc7	9.22748	0.981537	2.04608e-17	1.55546e-16
880	Ninj1	9.21374	30.0807	1.65021e-15	1.08847e-14
881	Trak2	9.21372	0.879373	6.26137e-17	4.66021e-16
882	Kctd20	9.21282	29.9639	1.65833e-15	1.09214e-14
883	Dnttip2	9.20933	29.9941	1.68979e-15	1.112e-14
884	Ano8	9.19422	30.0603	1.83292e-15	1.20433e-14
885	Tango2	9.18428	1.22839	2.74579e-17	2.07627e-16
886	4632427E13Rik	9.18002	30.0167	1.9784e-15	1.29771e-14
887	Mkln1	9.17503	0.997208	7.57971e-17	5.61201e-16
888	Luc7l	9.17436	29.987	2.03949e-15	1.33594e-14
889	Grn	9.15856	1.27465	4.78093e-17	3.58338e-16
890	Zfp120	9.15435	29.7378	2.27112e-15	1.4797e-14
891	Ythdc1	9.15269	30.0079	2.29148e-15	1.48955e-14
892	Cflar	9.14954	1.25174	4.22813e-17	3.17464e-16
893	Spock2	9.14201	29.9734	2.42694e-15	1.5764e-14
894	Vhl	9.13595	29.8073	2.50722e-15	1.62731e-14
895	Map4	9.12809	0.602061	3.99988e-17	3.0059e-16
896	Srsf6	9.12348	1.12405	4.84744e-17	3.63004e-16
897	Serpina3n	9.1223	29.9874	2.69803e-15	1.74716e-14
898	Naa15	9.12079	1.15363	7.35351e-17	5.45877e-16
899	Ucp3	9.119	1.43318	7.50365e-17	5.56053e-16
900	Tmem120b	9.11604	30.0178	2.79043e-15	1.80562e-14
901	Usp4	9.115	0.655429	5.73319e-17	4.28581e-16
902	Avpi1	9.10838	29.8423	2.90755e-15	1.87713e-14
903	Actg1	9.10476	0.663059	6.01471e-17	4.48446e-16
904	C4b	9.103	30.0105	2.99285e-15	1.93074e-14
905	Cited2	9.10093	29.8556	3.02633e-15	1.94939e-14
906	Numa1	9.10003	29.8814	3.04102e-15	1.95737e-14
907	Dmac1	9.09804	2.12505	5.03648e-17	3.7683e-16
908	Anapc5	9.09113	0.43261	6.48011e-17	4.81881e-16
909	Sec61a2	9.08853	2.02465	7.44281e-17	5.52025e-16
910	Tsc22d1	9.08174	0.618987	1.27761e-16	9.30581e-16
911	Ikzf5	9.08018	30.0354	3.383e-15	2.17256e-14
912	Wwp1	9.07683	0.547098	5.8493e-17	4.36878e-16
913	Dusp7	9.07617	29.9623	3.45672e-15	2.21824e-14
914	Anapc16	9.06581	0.941035	6.19135e-17	4.61212e-16
915	Ipo8	9.06497	2.18756	7.24049e-17	5.37955e-16
916	Ehd3	9.05907	2.36882	8.84148e-17	6.52921e-16
917	Nudt18	9.05886	29.7027	3.79341e-15	2.43247e-14
918	Gnaq	9.05406	2.30302	9.5126e-17	7.0066e-16
919	Nudt3	9.04953	0.768752	9.89798e-17	7.2716e-16
920	Vezf1	9.04862	0.745563	1.18868e-16	8.67285e-16
921	Lox	9.04186	29.9699	4.15562e-15	2.66072e-14
922	Fhl3	9.03543	29.9687	4.30165e-15	2.75009e-14
923	Dgcr2	9.03479	2.16157	7.96661e-17	5.89335e-16
924	Mdk	9.03276	30.0139	4.36356e-15	2.7834e-14
925	Coq10a	9.02844	0.723823	1.01834e-16	7.47484e-16
926	Pdk2	9.02366	0.536411	9.71321e-17	7.14202e-16
927	Dnajc28	9.0215	2.00077	9.66868e-17	7.11542e-16
928	Ttc19	9.02149	1.09081	1.45464e-16	1.04966e-15
929	Leng1	9.00205	29.8066	5.14499e-15	3.26962e-14
930	Tmpo	8.99693	1.07542	1.07203e-16	7.84866e-16
931	Ppp1ccb	8.99298	0.636676	1.06576e-16	7.8095e-16
932	Spop	8.98556	0.615266	4.18552e-16	2.90228e-15
933	Camk2d	8.98245	1.01988	1.30429e-16	9.47584e-16
934	Pdcl	8.98218	29.7924	5.72344e-15	3.62911e-14
935	Slc39a14	8.982	29.8563	5.7291e-15	3.62999e-14
936	Tnrc6a	8.98096	1.37235	1.20227e-16	8.76451e-16
937	C1qbp	8.97957	1.1242	1.81935e-16	1.2942e-15
938	Wdr3	8.97588	29.7775	5.91997e-15	3.74536e-14
939	Foxo4	8.97227	0.742198	1.46133e-16	1.05359e-15
940	Ddx49	8.96934	1.16344	1.63918e-16	1.17296e-15
941	9930021J03Rik	8.96841	2.05075	1.37735e-16	9.96414e-16
942	Trim27	8.96114	2.0504	1.33879e-16	9.69345e-16
943	Rai1	8.95766	30.019	6.52733e-15	4.1113e-14
944	Sf3b4	8.95539	1.20576	1.33604e-16	9.68769e-16
945	Ttbk2	8.955	30.0484	6.62093e-15	4.1641e-14
946	Eif3j1	8.95275	0.928756	1.30168e-16	9.46495e-16
947	Nfe2l1	8.95164	0.506255	1.33195e-16	9.66855e-16
948	Peg3	8.9465	29.7152	6.92968e-15	4.35507e-14
949	Kmt2c	8.94476	1.1035	2.20144e-16	1.55175e-15
950	Pafah1b1	8.94277	0.801285	1.51899e-16	1.09424e-15
951	Akap13	8.93859	2.01007	2.07519e-16	1.4664e-15
952	Nceh1	8.93655	29.955	7.30903e-15	4.58672e-14
953	Nup62	8.93517	2.02146	1.56489e-16	1.12256e-15
954	Mapt	8.93285	1.00512	2.38592e-16	1.68039e-15
955	Ormdl3	8.93206	2.11865	1.5432e-16	1.10886e-15
956	Ankhd1	8.9316	29.9486	7.50519e-15	4.69943e-14
957	Usp38	8.93027	1.16277	1.60213e-16	1.14831e-15
958	Utp11	8.92907	1.32118	1.54193e-16	1.10886e-15
959	Eef1d	8.92783	0.638834	1.63928e-16	1.17296e-15
960	Fto	8.9275	0.685827	1.54617e-16	1.11006e-15
961	Nrp1	8.92732	1.06196	3.47128e-16	2.41882e-15
962	Atp5e	8.92708	0.253142	2.04973e-16	1.45081e-15
963	Acacb	8.91517	1.22606	3.14551e-16	2.20082e-15
964	Fus	8.9061	1.02695	2.1992e-16	1.55145e-15
965	Csnk1a1	8.90238	0.537643	1.87045e-16	1.32833e-15
966	Cluh	8.9018	1.11556	1.83851e-16	1.30674e-15
967	5330406M23Rik	8.89926	30.0072	8.92398e-15	5.56736e-14
968	Rsl1d1	8.89787	1.24176	1.87425e-16	1.32992e-15
969	Iba57	8.89508	30.0142	9.12584e-15	5.68497e-14
970	Maff	8.89486	29.7511	9.1368e-15	5.68764e-14
971	Marveld1	8.894	29.8936	9.17895e-15	5.70555e-14
972	Retreg1	8.89184	1.31779	2.28402e-15	1.48584e-14
973	Ywhab	8.89175	0.649084	4.58037e-16	3.15044e-15
974	Selenoo	8.87943	29.8055	9.92324e-15	6.12796e-14
975	Klf4	8.8692	29.8023	1.04816e-14	6.46337e-14
976	Slc7a8	8.86506	29.9841	1.07164e-14	6.58915e-14
977	Zrsr2	8.85372	29.8269	1.13864e-14	6.99602e-14
978	Ulk1	8.85164	1.0284	2.72055e-16	1.91134e-15
979	Snhg8	8.84429	0.76929	4.44486e-16	3.06217e-15
980	Tpt1	8.84077	0.209943	2.82879e-16	1.98574e-15
981	Cog2	8.83816	29.6977	1.23745e-14	7.58125e-14
982	Stim2	8.82127	2.04645	3.16207e-16	2.21059e-15
983	Pkdcc	8.81929	1.19261	5.51473e-16	3.76273e-15
984	Midn	8.81838	29.7038	1.37543e-14	8.40845e-14
985	Phactr2	8.8183	2.07767	3.19498e-16	2.23177e-15
986	Gucd1	8.81379	29.7301	1.40961e-14	8.59988e-14
987	Zscan21	8.81377	29.6858	1.40977e-14	8.59988e-14
988	Polr3f	8.8103	29.9503	1.43614e-14	8.742e-14
989	Zfp652	8.80418	0.637809	4.02243e-16	2.79601e-15
990	Ankrd13a	8.79571	2.05607	3.88864e-16	2.70522e-15
991	Tcf12	8.79104	2.10818	4.17878e-16	2.89997e-15
992	Cbx6	8.78946	29.834	1.60525e-14	9.7505e-14
993	Kdm6b	8.78671	29.7799	1.629e-14	9.88771e-14
994	Mbtps2	8.78282	2.03254	4.02911e-16	2.79838e-15
995	Srfbp1	8.78057	29.823	1.68331e-14	1.02028e-13
996	Vps4b	8.7765	1.97229	4.20211e-16	2.91142e-15
997	Uqcr11	8.77419	0.385274	4.29875e-16	2.97113e-15
998	Dab2ip	8.77414	2.06768	4.29064e-16	2.96793e-15
999	Alpk2	8.77283	1.16266	4.40762e-16	3.04086e-15
1000	Taf7	8.76154	29.8238	1.86336e-14	1.12302e-13
1001	Lias	8.76031	1.1104	4.68283e-16	3.21572e-15
1002	Prpf4	8.7557	29.8437	1.92232e-14	1.15774e-13
1003	Tspyl2	8.72562	29.8612	2.25706e-14	1.35647e-13
1004	Ank3	8.7217	1.12616	6.38709e-16	4.33366e-15
1005	Cpeb3	8.72126	2.01499	6.78587e-16	4.59692e-15
1006	Efhd2	8.71042	29.5134	2.4476e-14	1.46684e-13
1007	Wbp1l	8.70755	0.846332	7.45548e-16	5.03452e-15
1008	Fiz1	8.69993	1.32026	7.02764e-16	4.75692e-15
1009	Fbxl20	8.69797	29.6604	2.61569e-14	1.56648e-13
1010	Rnpepl1	8.69499	2.08427	7.23679e-16	4.89459e-15
1011	Car4	8.67548	29.7918	2.94877e-14	1.75976e-13
1012	Slc27a4	8.67356	29.7619	2.97907e-14	1.77412e-13
1013	Hadha	8.66071	0.958274	1.09098e-15	7.29773e-15
1014	Hspa13	8.64964	2.00694	1.0626e-15	7.13028e-15
1015	Hip1	8.64449	2.13631	1.01461e-15	6.819e-15
1016	Odf3l2	8.63697	2.22467	1.15987e-15	7.71614e-15
1017	Chd7	8.63564	2.00644	1.06468e-15	7.13866e-15
1018	Pomp	8.63249	0.429174	1.14094e-15	7.61398e-15
1019	Jade2	8.63217	29.6067	3.71373e-14	2.19476e-13
1020	Cblb	8.62844	29.6446	3.78825e-14	2.2357e-13
1021	Rab11fip3	8.62659	1.20262	1.14927e-15	7.6576e-15
1022	Smim10l1	8.62299	0.530164	1.63732e-15	1.08081e-14
1023	Ppfibp1	8.62206	29.7797	3.91917e-14	2.30817e-13
1024	Nudt7	8.62074	29.5793	3.94675e-14	2.3212e-13
1025	Zc3h13	8.61768	29.6565	4.01163e-14	2.35773e-13
1026	Lsm12	8.61722	0.916955	1.58449e-15	1.04675e-14
1027	Prkag2	8.61429	29.625	4.08453e-14	2.39892e-13
1028	Itfg2	8.61327	29.3897	4.10675e-14	2.41031e-13
1029	Pnkp	8.60876	2.36164	1.70312e-15	1.1199e-14
1030	Psmc6	8.60241	0.747028	2.2418e-15	1.46284e-14
1031	Slc3a2	8.60123	1.08988	1.33653e-15	8.86375e-15
1032	Bub3	8.59888	0.615475	3.06181e-15	1.96926e-14
1033	Slc25a17	8.5934	29.7673	4.56477e-14	2.66993e-13
1034	Tpp2	8.5913	0.912901	1.43038e-15	9.47141e-15
1035	Tbx1	8.58979	1.37144	1.46647e-15	9.69529e-15
1036	S100a6	8.58845	0.577586	1.4601e-15	9.66072e-15
1037	Hadh	8.58476	0.449102	1.65175e-15	1.08865e-14
1038	Igfn1	8.57128	30.0057	5.13455e-14	2.99089e-13
1039	Mlh3	8.57015	29.88	5.16543e-14	3.00682e-13
1040	Chchd5	8.56758	29.6566	5.23652e-14	3.04404e-13
1041	Sft2d2	8.56525	1.92225	1.90488e-15	1.25064e-14
1042	Gripap1	8.56156	29.6716	5.40692e-14	3.13667e-13
1043	Ern1	8.55442	29.8124	5.61581e-14	3.24901e-13
1044	Pds5b	8.5525	1.92061	2.26417e-15	1.4763e-14
1045	Gnb2	8.55041	29.7753	5.73684e-14	3.31678e-13
1046	Lbx1	8.54604	0.581365	2.2758e-15	1.48162e-14
1047	Ctxn3	8.54495	0.872683	2.09605e-15	1.37193e-14
1048	Max	8.54127	0.948575	2.56579e-15	1.66279e-14
1049	Syncrip	8.54124	0.649803	1.9796e-15	1.29771e-14
1050	Dmwd	8.53461	1.15614	2.20646e-15	1.44198e-14
1051	Eps15l1	8.53093	29.6565	6.36244e-14	3.66852e-13
1052	Sars	8.51342	0.992217	2.84047e-15	1.83661e-14
1053	Fbxo38	8.51253	29.5921	7.01534e-14	4.0232e-13
1054	Kdm7a	8.49773	1.24465	2.90279e-15	1.87548e-14
1055	Gtf3c3	8.49462	29.7007	7.71505e-14	4.41556e-13
1056	Ppp2cb	8.48819	29.6579	7.98258e-14	4.55949e-13
1057	Ppard	8.48247	29.7488	8.2287e-14	4.69378e-13
1058	Tigd2	8.47765	1.54148	3.01107e-15	1.94102e-14
1059	Mtr	8.47684	29.4449	8.47826e-14	4.82321e-13
1060	Fitm2	8.46315	0.871069	3.37912e-15	2.17171e-14
1061	Naa50	8.4621	0.579813	7.3725e-15	4.61974e-14
1062	Psap	8.46126	0.474033	4.32386e-15	2.76221e-14
1063	Plrg1	8.45495	0.875602	4.46081e-15	2.84331e-14
1064	Arrdc3	8.45431	29.8114	9.55396e-14	5.40989e-13
1065	Ciart	8.44939	30.0821	9.80627e-14	5.54171e-13
1066	Gtf2h3	8.43435	29.5456	1.06202e-13	5.98186e-13
1067	Afap1	8.4272	1.25273	4.32811e-15	2.76286e-14
1068	Trappc10	8.42648	1.96883	4.19832e-15	2.68604e-14
1069	Bri3bp	8.41814	29.4664	1.15724e-13	6.49245e-13
1070	Actr1a	8.41796	1.15985	6.20601e-15	3.9176e-14
1071	Slc4a1ap	8.41005	29.6046	1.20789e-13	6.75881e-13
1072	Lrrc14b	8.39993	1.09728	4.97956e-15	3.16921e-14
1073	Ctnnd1	8.39863	1.06952	5.70814e-15	3.6221e-14
1074	Rbpj	8.38172	0.734683	9.59435e-15	5.95073e-14
1075	Hccs	8.37945	29.7237	1.42031e-13	7.89556e-13
1076	Tbl1xr1	8.37918	1.07979	5.85661e-15	3.70802e-14
1077	Spr	8.36818	0.849913	6.11209e-15	3.86117e-14
1078	Synpo	8.36559	0.890043	6.32083e-15	3.98418e-14
1079	Ttc28	8.36263	2.10575	6.59241e-15	4.14922e-14
1080	Psmd2	8.356	0.669434	1.23266e-14	7.55734e-14
1081	Tex2	8.34939	0.78581	7.89231e-15	4.93458e-14
1082	Rsrc2	8.33966	0.69928	7.35009e-15	4.60908e-14
1083	Dyrk1a	8.33201	0.592686	9.61967e-15	5.95776e-14
1084	Sod1	8.33064	0.49134	7.77842e-15	4.86694e-14
1085	Kcnn1	8.32816	29.4801	1.86269e-13	1.02412e-12
1086	Tmsb10	8.3281	1.15573	7.90683e-15	4.94003e-14
1087	Alpk3	8.32206	0.758444	9.93827e-15	6.1328e-14
1088	Csnk1d	8.31977	0.904964	8.40277e-15	5.24604e-14
1089	Prxl2b	8.31889	0.820124	1.07001e-14	6.58384e-14
1090	Cox10	8.31778	1.11913	9.10535e-15	5.67635e-14
1091	Otub1	8.31254	1.89549	9.64613e-15	5.96895e-14
1092	Bcdin3d	8.31032	29.6086	2.04682e-13	1.12318e-12
1093	Sparc	8.30936	0.526511	9.15644e-15	5.69571e-14
1094	Plaa	8.30192	1.43505	9.77133e-15	6.03853e-14
1095	Mitf	8.29795	1.13103	9.6097e-15	5.95591e-14
1096	Znhit1	8.29288	29.4942	2.24424e-13	1.22599e-12
1097	Rp9	8.28769	1.16776	1.0637e-14	6.54976e-14
1098	Chd8	8.28491	29.7533	2.3407e-13	1.27623e-12
1099	Gpt	8.28145	29.4684	2.3838e-13	1.2989e-12
1100	Cd164	8.27824	0.836993	1.96457e-14	1.18235e-13
1101	Pde4d	8.27715	29.5629	2.43851e-13	1.32701e-12
1102	Emc8	8.27467	1.86059	1.37826e-14	8.41973e-14
1103	Rwdd4a	8.26966	1.00738	1.16431e-14	7.14862e-14
1104	Ccng1	8.2644	0.367328	1.2821e-14	7.84915e-14
1105	Idh3a	8.25932	0.289818	1.23206e-14	7.55734e-14
1106	Nufip2	8.25071	1.1682	1.34239e-14	8.21237e-14
1107	Zbtb10	8.25029	29.5767	2.80961e-13	1.52215e-12
1108	Gys1	8.24959	0.687227	1.47685e-14	8.98337e-14
1109	Meg3	8.24796	29.7979	2.84439e-13	1.53904e-12
1110	Tnks2	8.24243	0.542975	1.42093e-14	8.65557e-14
1111	Lpgat1	8.24023	1.17345	1.41313e-14	8.61426e-14
1112	Tmem11	8.22976	0.846087	1.70032e-14	1.0284e-13
1113	Socs7	8.22964	0.817734	3.08762e-14	1.8362e-13
1114	Sfr1	8.22822	0.63743	3.65447e-14	2.16124e-13
1115	Larp4b	8.2253	0.894972	1.80221e-14	1.08694e-13
1116	Eif4a2	8.22507	0.69636	1.5564e-14	9.46051e-14
1117	Per3	8.2244	29.7449	3.2204e-13	1.73808e-12
1118	Sort1	8.22318	1.2158	1.73501e-14	1.04789e-13
1119	Itga1	8.21702	1.87275	1.70018e-14	1.0284e-13
1120	Pde4dip	8.21667	0.413749	1.71419e-14	1.03605e-13
1121	Ncl	8.21371	0.7679	1.66053e-14	1.00719e-13
1122	Yjefn3	8.20566	29.5027	3.55457e-13	1.90277e-12
1123	Fam91a1	8.20187	29.4566	3.62618e-13	1.93988e-12
1124	Srf	8.19488	29.6474	3.76213e-13	2.00757e-12
1125	Mrpl24	8.17141	0.950032	2.21524e-14	1.33227e-13
1126	Gnl3l	8.16867	1.26355	2.28587e-14	1.37184e-13
1127	Fbxo31	8.16662	0.770215	3.75485e-14	2.21752e-13
1128	Rbm20	8.1602	1.99103	2.39832e-14	1.43832e-13
1129	Chuk	8.1586	29.4554	4.55331e-13	2.39675e-12
1130	Tnfrsf12a	8.15589	29.4997	4.61869e-13	2.42666e-12
1131	Gga1	8.15134	29.4702	4.73044e-13	2.47926e-12
1132	Gpatch11	8.15047	29.505	4.75211e-13	2.48909e-12
1133	St3gal5	8.14688	0.598243	3.86847e-14	2.27988e-13
1134	Stat3	8.13833	1.5567	3.32155e-14	1.96981e-13
1135	Dhrs3	8.13531	0.946036	2.97049e-14	1.77025e-13
1136	Psmg2	8.13315	0.901893	6.94197e-14	3.98649e-13
1137	Odf2	8.13126	29.2859	5.25695e-13	2.75014e-12
1138	Bod1l	8.12752	29.3188	5.36119e-13	2.80123e-12
1139	Arpc2	8.12733	0.640277	5.61457e-14	3.24901e-13
1140	Mrpl47	8.12492	0.912473	3.00484e-14	1.78821e-13
1141	Rgcc	8.12343	1.26949	3.55251e-14	2.10386e-13
1142	Eif3d	8.12194	0.949913	3.11557e-14	1.85023e-13
1143	Wdr26	8.11872	0.836823	3.10853e-14	1.84734e-13
1144	Ddx39b	8.11682	0.713447	5.21271e-14	3.03227e-13
1145	Ube2d1	8.11471	0.458845	3.42501e-14	2.02976e-13
1146	Tsnax	8.10924	0.683348	4.96474e-14	2.89791e-13
1147	Pmpcb	8.10274	0.818793	4.13406e-14	2.42467e-13
1148	Cdk13	8.09558	29.4924	6.34037e-13	3.28666e-12
1149	Ctnnbip1	8.09299	1.38668	3.60385e-14	2.13278e-13
1150	Appbp2	8.08352	29.8474	6.75445e-13	3.49069e-12
1151	Slc4a4	8.0761	29.5392	7.0226e-13	3.60957e-12
1152	Ankrd40	8.07033	0.441889	4.17085e-14	2.44457e-13
1153	Ganab	8.06503	0.942249	4.64759e-14	2.71651e-13
1154	Thoc2l	8.06103	29.5565	7.60025e-13	3.88538e-12
1155	Mia3	8.0515	1.024	6.68485e-14	3.84142e-13
1156	Mpnd	8.04999	1.0587	5.12338e-14	2.98642e-13
1157	Bcat2	8.04027	0.759637	5.39063e-14	3.12936e-13
1158	Rheb	8.04015	0.667614	9.75968e-14	5.51904e-13
1159	Dst	8.02859	0.681199	1.64724e-13	9.11543e-13
1160	Gtpbp4	8.02788	1.1214	5.43164e-14	3.14887e-13
1161	Sel1l	8.0225	1.07099	5.59102e-14	3.23907e-13
1162	Card10	8.01834	1.92611	5.84272e-14	3.3757e-13
1163	Cfd	8.01526	2.59581	1.0391e-13	5.85664e-13
1164	Spg7	8.01344	1.05522	5.92774e-14	3.42251e-13
1165	Riox2	8.00385	29.3918	1.02542e-12	5.16163e-12
1166	Patl1	8.00303	1.04455	6.42198e-14	3.70035e-13
1167	Akip1	8.00287	29.3582	1.03067e-12	5.18195e-12
1168	Oip5os1	8.00147	0.414464	6.52214e-14	3.75298e-13
1169	Rad21	7.99678	0.898176	7.41632e-14	4.24744e-13
1170	Bcl2l1	7.995	29.4489	1.07399e-12	5.39336e-12
1171	Akap1	7.97826	1.20653	7.84943e-14	4.48945e-13
1172	Oxsr1	7.97546	0.879398	1.3692e-13	7.61637e-13
1173	Cox7a1	7.96828	0.317394	8.29815e-14	4.72706e-13
1174	Sorbs2	7.96465	1.1284	8.74242e-14	4.96686e-13
1175	Top1	7.95883	1.09874	8.37741e-14	4.76902e-13
1176	Ndufs5-ps	7.95599	0.667245	8.51581e-14	4.84134e-13
1177	Polr2l	7.95345	0.374059	9.24647e-14	5.24973e-13
1178	Arhgdia	7.9496	1.08457	1.00124e-13	5.65443e-13
1179	Pgp	7.9485	0.664954	1.0083e-13	5.69058e-13
1180	Nme7	7.94685	1.33307	9.38385e-14	5.32418e-13
1181	Cuedc1	7.94564	0.639215	1.21466e-13	6.7922e-13
1182	Atp5l2-ps	7.94408	0.361004	9.46042e-14	5.36049e-13
1183	Tcim	7.94147	1.88809	1.11194e-13	6.24648e-13
1184	Elk4	7.93774	1.1883	9.61192e-14	5.43909e-13
1185	Mpdz	7.93539	1.83499	1.10304e-13	6.20062e-13
1186	Hps5	7.91923	1.8263	1.47325e-13	8.17917e-13
1187	Dcaf12	7.91527	0.920934	1.1846e-13	6.64154e-13
1188	Eloc	7.90449	0.544913	1.19728e-13	6.70823e-13
1189	Psma7	7.9026	0.777251	1.23237e-13	6.88671e-13
1190	Timm44	7.87527	0.923369	1.705e-13	9.41065e-13
1191	Atp2b1	7.86797	1.18999	1.48216e-13	8.21258e-13
1192	Arl8b	7.86797	0.540404	1.48107e-13	8.21191e-13
1193	Ttc17	7.86738	29.3593	2.09093e-12	1.02114e-11
1194	Tbc1d12	7.86358	29.3096	2.13274e-12	1.04037e-11
1195	Luc7l2	7.85897	0.998093	1.69023e-13	9.34122e-13
1196	Trappc8	7.85167	29.4746	2.26926e-12	1.10471e-11
1197	Golga4	7.84737	0.527313	1.69595e-13	9.36673e-13
1198	Slc35c2	7.8454	0.908133	2.24062e-13	1.22479e-12
1199	Psip1	7.84448	1.92829	1.71681e-13	9.46969e-13
1200	Qser1	7.84326	0.905625	1.73017e-13	9.53721e-13
1201	Hbb-bs	7.84316	1.12173	2.22522e-13	1.21716e-12
1202	Thumpd1	7.84299	1.16385	1.74662e-13	9.62165e-13
1203	Nr3c1	7.8396	1.07401	1.85357e-13	1.01976e-12
1204	Pdrg1	7.82722	0.435481	1.93348e-13	1.06167e-12
1205	Cadm1	7.81957	29.6261	2.68174e-12	1.2941e-11
1206	Zbtb46	7.81561	1.99893	2.39719e-13	1.30536e-12
1207	Cd47	7.81484	1.27709	2.06622e-13	1.1331e-12
1208	Pcgf5	7.81452	0.944629	2.25606e-13	1.23166e-12
1209	Kxd1	7.81451	0.241278	2.08457e-13	1.14169e-12
1210	Add1	7.81363	0.715524	3.53686e-13	1.89447e-12
1211	Ift52	7.81203	29.6878	2.78906e-12	1.34284e-11
1212	Gsr	7.80496	1.08702	2.66174e-13	1.44572e-12
1213	Pola2	7.80426	29.5896	2.90398e-12	1.39267e-11
1214	Fgfr1op	7.79685	0.959642	3.26809e-13	1.76047e-12
1215	Prg4	7.79517	29.4096	3.04442e-12	1.45592e-11
1216	Elavl1	7.78192	1.1511	2.54437e-13	1.38373e-12
1217	Tcf4	7.77569	0.945203	2.72935e-13	1.4815e-12
1218	Tsfm	7.7654	1.88464	2.81561e-13	1.52444e-12
1219	Cpsf2	7.7554	29.3322	3.74262e-12	1.76506e-11
1220	Dmac2	7.75378	1.03255	3.02267e-13	1.63447e-12
1221	Stt3b	7.74882	0.970839	3.90294e-13	2.0788e-12
1222	Bnip3l-ps	7.74879	0.582584	3.40782e-13	1.82996e-12
1223	Fam133b	7.74605	29.5057	3.92871e-12	1.8406e-11
1224	Wdr18	7.74566	1.05605	3.25811e-13	1.75621e-12
1225	R3hdm2	7.74334	0.625865	4.10373e-13	2.17759e-12
1226	Furin	7.74306	1.14943	3.25739e-13	1.75621e-12
1227	Tmcc3	7.74103	1.10447	3.42365e-13	1.8373e-12
1228	Agpat3	7.73712	0.777431	3.35843e-13	1.80685e-12
1229	Cd93	7.73673	1.13269	3.8882e-13	2.07225e-12
1230	Ubap1	7.73352	0.683381	4.4121e-13	2.32817e-12
1231	Ndst1	7.73141	1.25798	3.48541e-13	1.86927e-12
1232	Flt1	7.72344	0.945592	3.66031e-13	1.95691e-12
1233	Sox6	7.71964	0.414042	4.25163e-13	2.25046e-12
1234	C1qb	7.7105	1.08866	4.02147e-13	2.13793e-12
1235	Psme3	7.709	0.511771	4.03426e-13	2.14205e-12
1236	Uqcrq	7.70466	0.271512	4.2247e-13	2.23759e-12
1237	Man2a1	7.7021	1.21061	4.1796e-13	2.21646e-12
1238	Gab1	7.69591	1.22049	4.42233e-13	2.33212e-12
1239	Usp50	7.69588	0.35392	4.66851e-13	2.45133e-12
1240	Terf2	7.68224	0.893969	4.71932e-13	2.47495e-12
1241	Ssr2	7.67653	29.0956	5.63154e-12	2.55957e-11
1242	Ints6	7.67553	1.04847	5.54969e-13	2.89086e-12
1243	Phb2	7.67419	0.732135	5.53923e-13	2.88894e-12
1244	Usp9x	7.65657	0.625358	6.72061e-13	3.47531e-12
1245	A430005L14Rik	7.65595	1.1078	5.69875e-13	2.96488e-12
1246	Odc1	7.65241	0.847453	6.02549e-13	3.12724e-12
1247	Slc15a4	7.65134	1.22777	5.7951e-13	3.01317e-12
1248	Agl	7.65052	0.33735	6.67974e-13	3.45627e-12
1249	Kdm5a	7.64764	29.2867	6.53879e-12	2.94056e-11
1250	Sh2d3c	7.64463	29.2639	6.64145e-12	2.98351e-11
1251	Wwc2	7.64402	29.3113	6.66222e-12	2.98976e-11
1252	Ago2	7.62855	0.657128	9.2098e-13	4.66623e-12
1253	Arih1	7.62845	0.851945	6.93921e-13	3.57533e-12
1254	Ube2v1	7.62103	0.440566	6.87934e-13	3.54877e-12
1255	Prkca	7.61585	0.882129	7.29951e-13	3.74512e-12
1256	Usp7	7.61305	1.06581	8.28676e-13	4.22367e-12
1257	Tbc1d19	7.61201	1.80007	7.45606e-13	3.82084e-12
1258	Tial1	7.60996	0.984755	8.02653e-13	4.10084e-12
1259	Rex1bd	7.6095	0.780142	7.51725e-13	3.84757e-12
1260	Emc1	7.60509	0.928789	7.59003e-13	3.88249e-12
1261	Fam20b	7.60147	0.837758	9.4815e-13	4.79249e-12
1262	Marchf6	7.57386	0.515131	1.00747e-12	5.08327e-12
1263	Rnf141	7.57156	1.14443	1.01718e-12	5.12319e-12
1264	Trim24	7.56177	0.993175	1.01637e-12	5.12211e-12
1265	Clic5	7.5428	0.67717	1.12582e-12	5.63041e-12
1266	Atf4	7.53951	0.695757	1.39503e-12	6.91189e-12
1267	Eif4a1	7.53721	1.13324	1.15561e-12	5.77262e-12
1268	Rpia	7.5318	0.998129	1.37314e-12	6.8153e-12
1269	Ephx2	7.52782	1.01177	1.59912e-12	7.8773e-12
1270	Hspa1b	7.51993	29.3819	1.26286e-11	5.37565e-11
1271	Aplp2	7.517	0.502823	1.4947e-12	7.3971e-12
1272	Zfp91	7.51433	0.595565	1.48271e-12	7.34206e-12
1273	Hnrnpa0	7.51392	1.30111	1.36563e-12	6.78989e-12
1274	C2cd2	7.50428	0.883268	2.56985e-12	1.24362e-11
1275	Gpr157	7.48354	1.19745	1.67714e-12	8.24254e-12
1276	Il6ra	7.47527	29.1293	1.5884e-11	6.60633e-11
1277	Rab1a	7.47362	0.76837	2.36979e-12	1.15139e-11
1278	Snx13	7.46704	0.702248	1.83106e-12	8.9783e-12
1279	Hba-a1	7.45189	1.12558	2.78636e-12	1.3423e-11
1280	Ppp2r3a	7.4477	0.38276	1.98795e-12	9.73077e-12
1281	Srek1ip1	7.44763	0.910357	2.05706e-12	1.00517e-11
1282	Lrpap1	7.43626	29.2972	1.94009e-11	7.92971e-11
1283	Dync1i2	7.43291	0.437395	2.87383e-12	1.37976e-11
1284	Mt2	7.41383	3.28225	6.68911e-12	2.99866e-11
1285	2900097C17Rik	7.41304	0.471616	2.52792e-12	1.22473e-11
1286	Man2a2	7.41176	0.97849	2.72224e-12	1.31216e-11
1287	Pard6b	7.41048	29.5163	2.21383e-11	8.9882e-11
1288	Taok1	7.39198	0.980723	3.47636e-12	1.65045e-11
1289	Ccnt1	7.38959	0.99667	3.39815e-12	1.61873e-11
1290	Shprh	7.38619	29.0798	2.50664e-11	1.0062e-10
1291	Ncoa1	7.38598	1.03891	2.8926e-12	1.38799e-11
1292	Slc6a6	7.38133	1.02239	3.18342e-12	1.52027e-11
1293	Rilpl1	7.35992	0.521903	3.55676e-12	1.68486e-11
1294	Cryz	7.35791	1.82007	3.5185e-12	1.66767e-11
1295	Ier3ip1	7.35703	0.581665	3.7005e-12	1.74713e-11
1296	Tmem100	7.35575	0.871868	3.48615e-12	1.65417e-11
1297	Oxa1l	7.35242	0.697023	3.68729e-12	1.74282e-11
1298	Dusp1	7.34729	1.79737	3.85161e-12	1.81045e-11
1299	Smg7	7.34352	0.751071	4.33006e-12	2.01754e-11
1300	Nsf	7.33989	1.26713	3.84851e-12	1.80999e-11
1301	Atxn1	7.33669	1.13292	3.89843e-12	1.83044e-11
1302	Prpf40a	7.32531	1.05434	4.24341e-12	1.97933e-11
1303	Atp5pb	7.32251	0.264237	4.58184e-12	2.12094e-11
1304	Ecd	7.31851	1.09165	4.37689e-12	2.03713e-11
1305	Appl1	7.31834	1.03276	4.3829e-12	2.03881e-11
1306	Ube2g1	7.31452	0.553525	1.11011e-11	4.77553e-11
1307	Nktr	7.31277	0.949062	4.53757e-12	2.10273e-11
1308	Tm9sf3	7.31052	0.696461	7.14133e-12	3.18965e-11
1309	Ilf3	7.30558	0.971974	4.79918e-12	2.21074e-11
1310	Eif3g	7.30424	0.839612	5.06797e-12	2.32576e-11
1311	Esyt1	7.29748	1.74116	5.89732e-12	2.6704e-11
1312	Ecpas	7.29554	0.910821	5.02315e-12	2.30767e-11
1313	Tnfaip1	7.29054	0.877871	6.79116e-12	3.03962e-11
1314	Lbr	7.28344	0.783283	5.42004e-12	2.47003e-11
1315	Pik3r1	7.28072	2.66072	1.61377e-11	6.69551e-11
1316	Anxa6	7.2711	0.324013	9.17348e-12	4.01522e-11
1317	Myo1e	7.27074	1.80847	6.00706e-12	2.71721e-11
1318	Nrap	7.27053	0.307314	5.80163e-12	2.63127e-11
1319	Srsf11	7.27003	0.789831	5.81654e-12	2.63523e-11
1320	Ppp1cc	7.26574	0.455416	6.74997e-12	3.02436e-11
1321	Map7d1	7.26369	0.670627	6.27102e-12	2.8276e-11
1322	Prkaca	7.26038	0.729706	6.28607e-12	2.83289e-11
1323	Pank3	7.25992	1.16801	6.21184e-12	2.80388e-11
1324	Timp4	7.25507	1.075	6.49183e-12	2.92252e-11
1325	Ldlrad3	7.24606	29.219	5.11855e-11	1.96488e-10
1326	Ndufa8	7.24451	0.272425	6.82413e-12	3.05277e-11
1327	Il6st	7.24189	0.805781	6.90646e-12	3.08798e-11
1328	Srpr	7.22286	0.860898	7.78097e-12	3.46444e-11
1329	Ptprg	7.21402	29.0252	6.02244e-11	2.28509e-10
1330	Slc30a9	7.21344	1.79383	8.17266e-12	3.61429e-11
1331	Cnst	7.21167	0.999531	8.35492e-12	3.68724e-11
1332	Tcp1	7.20846	0.362214	8.46395e-12	3.73343e-11
1333	Ebna1bp2	7.20842	1.05676	9.47432e-12	4.14052e-11
1334	Tmem179b	7.20647	29.0578	6.25735e-11	2.3679e-10
1335	Zc3h14	7.19857	0.57445	1.06304e-11	4.59625e-11
1336	Foxo1	7.19747	1.22491	1.10237e-11	4.74945e-11
1337	Txndc9	7.19409	0.759171	1.04411e-11	4.5282e-11
1338	Prxl2c	7.19123	1.11682	9.43237e-12	4.1243e-11
1339	Acly	7.18302	29.2224	7.04652e-11	2.64074e-10
1340	Gna11	7.1764	1.04058	1.02212e-11	4.44415e-11
1341	Pggt1b	7.17317	1.04853	1.10992e-11	4.77553e-11
1342	Epb41	7.16938	1.03748	1.07362e-11	4.63729e-11
1343	Tbc1d9b	7.1677	1.73047	1.07455e-11	4.63855e-11
1344	Tmbim6	7.16635	0.408796	1.09471e-11	4.71882e-11
1345	Coa5	7.16614	0.388393	1.16454e-11	4.99709e-11
1346	Kbtbd12	7.16086	1.74731	1.1164e-11	4.79775e-11
1347	Tor1aip2	7.15743	0.757947	1.28975e-11	5.47339e-11
1348	Dtx3	7.15227	0.988974	1.24817e-11	5.3211e-11
1349	Mbnl2	7.14932	0.414735	1.24804e-11	5.3211e-11
1350	Ssh2	7.14821	0.774013	1.46801e-11	6.1567e-11
1351	Cnksr1	7.14776	0.976076	1.36231e-11	5.74733e-11
1352	Rbm7	7.14233	1.16432	1.24595e-11	5.31695e-11
1353	Wdtc1	7.14205	0.848675	1.47816e-11	6.19317e-11
1354	Phkg1	7.14186	0.736193	1.40203e-11	5.90319e-11
1355	Pccb	7.13779	0.605327	1.30442e-11	5.52497e-11
1356	Etfbl	7.12895	0.7401	1.47627e-11	6.18827e-11
1357	Fam57b	7.12438	0.939015	1.53436e-11	6.40972e-11
1358	Dnmt3a	7.11164	0.943652	1.5248e-11	6.37601e-11
1359	Gstm2	7.10912	0.428796	1.56882e-11	6.54404e-11
1360	Myl6	7.10849	0.383248	1.58153e-11	6.5874e-11
1361	Tpi1	7.10656	0.238519	1.59757e-11	6.63799e-11
1362	Hbb-bt	7.10397	1.01217	1.90707e-11	7.80599e-11
1363	Mtmr1	7.10109	1.06427	1.596e-11	6.6347e-11
1364	Arid1b	7.10001	1.1309	1.62264e-11	6.72903e-11
1365	Septin11	7.0992	0.895094	1.65084e-11	6.83932e-11
1366	Cox5b-ps	7.09333	0.360787	1.72861e-11	7.13377e-11
1367	Plekhf2	7.08875	28.8583	1.13448e-10	4.13165e-10
1368	Cast	7.08554	0.928494	1.78627e-11	7.35746e-11
1369	Cyb5d2	7.07587	1.68856	1.84782e-11	7.59263e-11
1370	Cul1	7.07418	0.899435	1.92037e-11	7.85288e-11
1371	Ssbp3	7.07262	1.04627	1.90002e-11	7.78459e-11
1372	Pycr2	7.0704	29.2635	1.24436e-10	4.50105e-10
1373	Mdm2	7.06928	0.934518	1.97092e-11	8.04802e-11
1374	Amfr	7.06819	0.759352	2.1062e-11	8.5594e-11
1375	Bag6	7.0638	0.641676	2.46827e-11	9.92197e-11
1376	Afg3l2	7.06001	0.817156	2.02824e-11	8.27019e-11
1377	Mapk14	7.05958	0.823531	2.0478e-11	8.34593e-11
1378	BC048679	7.05918	29.2186	1.31665e-10	4.7504e-10
1379	Ipo7	7.05771	0.597275	2.26496e-11	9.18269e-11
1380	Snx9	7.05687	0.982997	2.06674e-11	8.41107e-11
1381	Snw1	7.05246	0.657615	2.26822e-11	9.19154e-11
1382	Arhgap5	7.04628	0.899062	2.39164e-11	9.64124e-11
1383	Rnf187	7.04486	0.796523	2.27836e-11	9.22821e-11
1384	Snx3	7.03834	0.366526	2.43068e-11	9.7847e-11
1385	Plekho2	7.03783	29.1771	1.46586e-10	5.25758e-10
1386	Grcc10	7.0377	0.42116	2.32683e-11	9.41111e-11
1387	Pigyl	7.03417	0.730123	3.22919e-11	1.27522e-10
1388	Zcchc24	7.032	0.825015	2.39291e-11	9.64179e-11
1389	Ctsa	7.02782	0.986091	2.56189e-11	1.02644e-10
1390	Otud4	7.0273	0.740858	2.47907e-11	9.95601e-11
1391	Calm1	7.01376	0.439154	2.86422e-11	1.14007e-10
1392	Bri3	7.0124	0.898529	2.68882e-11	1.07226e-10
1393	Map4k5	7.00667	1.03418	3.06349e-11	1.21316e-10
1394	Abhd12	7.0056	1.04253	3.28381e-11	1.29559e-10
1395	Ski	7.00418	0.761907	2.9921e-11	1.18599e-10
1396	Aamp	7.0041	0.703413	2.9056e-11	1.15384e-10
1397	Ptp4a1	7.00188	0.753658	2.89608e-11	1.15111e-10
1398	Fam120a	6.99954	0.588954	3.06632e-11	1.21371e-10
1399	Dync1h1	6.98681	0.697436	4.07125e-11	1.58353e-10
1400	Mknk2	6.98309	0.722367	4.42647e-11	1.71699e-10
1401	Clpp	6.97701	0.949252	3.63595e-11	1.42498e-10
1402	Cul7	6.97427	29.3118	2.01652e-10	7.06612e-10
1403	Kcnc4	6.97391	0.604367	4.96455e-11	1.91179e-10
1404	Ube4b	6.97167	0.88734	3.45631e-11	1.35938e-10
1405	Ccdc6	6.95788	0.554275	3.7035e-11	1.44843e-10
1406	Cmya5	6.93412	0.372196	5.94007e-11	2.25887e-10
1407	Pin1	6.92129	0.562789	5.40163e-11	2.06703e-10
1408	Dgkd	6.91334	1.08302	4.79721e-11	1.85573e-10
1409	Kiz	6.91063	0.908616	4.948e-11	1.90714e-10
1410	Wwtr1	6.90911	0.760096	4.93383e-11	1.90254e-10
1411	Tnfrsf23	6.9015	29.0679	2.90144e-10	1.00227e-09
1412	Esrra	6.90009	1.20631	5.46015e-11	2.08474e-10
1413	Irs1	6.89911	0.598233	5.33511e-11	2.04341e-10
1414	Atrx	6.89294	0.782278	5.45464e-11	2.0845e-10
1415	Plekhb1	6.87331	0.737838	6.27138e-11	2.3711e-10
1416	Ptpn11	6.86436	0.837257	6.36367e-11	2.40067e-10
1417	Actr2	6.8643	1.72349	6.37087e-11	2.40233e-10
1418	Cnot6l	6.85824	28.9852	3.5996e-10	1.23147e-09
1419	Secisbp2l	6.85573	0.973572	7.62916e-11	2.84782e-10
1420	Isg20	6.84752	29.3242	3.79677e-10	1.2958e-09
1421	Ulk4	6.84459	1.15048	8.34735e-11	3.10097e-10
1422	Tnpo3	6.84179	0.968069	7.45631e-11	2.78941e-10
1423	Rtraf-ps	6.83456	0.722047	7.57826e-11	2.8313e-10
1424	Acot7	6.83217	1.63482	8.23614e-11	3.06366e-10
1425	Rnf103	6.8257	28.9591	4.23197e-10	1.43285e-09
1426	Gcc2	6.82293	1.04844	8.1026e-11	3.01925e-10
1427	Satb1	6.82016	0.70371	8.22399e-11	3.06181e-10
1428	Mrpl15	6.81971	0.676142	9.35347e-11	3.44768e-10
1429	Pcbp4	6.81109	0.824613	9.02091e-11	3.33664e-10
1430	Hadhb	6.8029	0.416746	9.1512e-11	3.3775e-10
1431	Smc6	6.79627	0.908303	9.7289e-11	3.58141e-10
1432	Arhgap31	6.77796	29.0101	5.36299e-10	1.79793e-09
1433	Tomm20	6.77725	0.570217	1.08631e-10	3.96809e-10
1434	Zfp871	6.77024	1.007	1.13781e-10	4.14022e-10
1435	Samm50	6.76949	0.544868	1.23772e-10	4.48103e-10
1436	Mavs	6.76336	0.939033	1.14961e-10	4.17781e-10
1437	Ik	6.75631	0.686258	1.20766e-10	4.37759e-10
1438	Tpra1	6.75288	1.16245	1.29471e-10	4.67323e-10
1439	Uba52	6.75269	0.226958	1.2383e-10	4.48103e-10
1440	Ivns1abp	6.74695	0.801488	1.2761e-10	4.60998e-10
1441	Msi2	6.72779	0.590838	1.42595e-10	5.12092e-10
1442	Ccdc25	6.72504	0.797027	1.61634e-10	5.75616e-10
1443	Ndufs2	6.71889	0.288282	1.47523e-10	5.28898e-10
1444	Pdpk1	6.71617	0.861981	1.54282e-10	5.51045e-10
1445	Pxn	6.71329	0.782595	1.51806e-10	5.43671e-10
1446	Snx27	6.71225	1.01291	1.57735e-10	5.6267e-10
1447	2410006H16Rik	6.71168	1.17687	1.53307e-10	5.48396e-10
1448	Amot	6.71111	0.48191	2.00406e-10	7.02822e-10
1449	Pdgfb	6.70993	1.01062	1.60398e-10	5.7169e-10
1450	Ctbp1	6.70868	0.545762	1.86481e-10	6.5669e-10
1451	Ttc9c	6.70259	0.794273	1.62418e-10	5.78166e-10
1452	Clip4	6.68968	0.786745	1.75095e-10	6.19153e-10
1453	Stim1	6.68776	0.675116	1.88886e-10	6.64334e-10
1454	Tinagl1	6.684	1.05341	1.80764e-10	6.37876e-10
1455	Mrps6	6.68182	0.906061	1.85117e-10	6.52156e-10
1456	U2af2	6.67863	0.476202	2.07582e-10	7.26794e-10
1457	Ccnd2	6.66438	0.969597	2.00766e-10	7.03795e-10
1458	Lrrc57	6.66328	0.793403	2.05698e-10	7.20493e-10
1459	Glg1	6.65978	29.1796	9.61291e-10	3.14718e-09
1460	Crim1	6.65434	28.999	9.87345e-10	3.22752e-09
1461	Cd63	6.65298	0.495524	2.14157e-10	7.49198e-10
1462	Snrpb2	6.63742	0.89231	2.5727e-10	8.94148e-10
1463	Ppp2r2a	6.6287	0.81235	2.60072e-10	9.03152e-10
1464	Gnai2	6.62633	0.61353	2.51452e-10	8.75e-10
1465	Uqcr10	6.62156	0.269535	2.58197e-10	8.97007e-10
1466	Rab5b	6.61734	0.900833	2.67064e-10	9.27054e-10
1467	Api5	6.61586	0.701339	2.70529e-10	9.38701e-10
1468	Ppp3cb	6.60828	0.470376	4.44042e-10	1.50104e-09
1469	Kat6a	6.6064	0.812751	3.53353e-10	1.21081e-09
1470	Serping1	6.60527	0.394123	2.81194e-10	9.73329e-10
1471	Eps15	6.60002	0.732966	3.11748e-10	1.07429e-09
1472	Ryk	6.58818	0.615646	3.23708e-10	1.1137e-09
1473	Hectd1	6.57605	0.856206	3.3359e-10	1.14631e-09
1474	Dnajb5	6.5753	0.964174	3.49764e-10	1.19899e-09
1475	Slc25a28	6.56692	0.751679	3.48736e-10	1.19595e-09
1476	Tmem14c	6.55861	0.623585	4.12763e-10	1.40086e-09
1477	Tax1bp1	6.558	0.541283	3.67353e-10	1.25474e-09
1478	Rab2a	6.55774	0.329552	3.66927e-10	1.25379e-09
1479	Ints5	6.55191	1.59212	4.26734e-10	1.44368e-09
1480	Cox7a2l	6.54455	0.448668	4.86499e-10	1.63677e-09
1481	Ddr1	6.54362	28.909	1.69895e-09	5.41252e-09
1482	1810058I24Rik	6.54334	0.545599	3.97897e-10	1.35473e-09
1483	Hnrnpd	6.54247	1.00627	3.99868e-10	1.36089e-09
1484	Stk38	6.54057	1.05043	4.0802e-10	1.38587e-09
1485	Ucp2	6.53486	1.02058	4.26606e-10	1.44368e-09
1486	Arl6ip1	6.52672	0.847718	5.337e-10	1.78992e-09
1487	Vegfb	6.52488	0.473465	4.64134e-10	1.56648e-09
1488	Borcs6	6.52278	1.05194	4.77914e-10	1.6098e-09
1489	Lpp	6.51782	0.879036	4.65002e-10	1.56878e-09
1490	Ssr1	6.51533	0.64854	7.0621e-10	2.33812e-09
1491	Sun2	6.51374	0.933069	4.7259e-10	1.59249e-09
1492	Pitpnm2	6.50987	0.822397	4.8279e-10	1.62493e-09
1493	Npc1	6.5038	1.18081	5.18989e-10	1.74264e-09
1494	Camk2b	6.49983	0.680043	5.13603e-10	1.72524e-09
1495	Grb2	6.48694	0.762509	5.60267e-10	1.8746e-09
1496	Tbca	6.46641	0.411747	6.39646e-10	2.13182e-09
1497	Coq9	6.46192	0.469821	7.46122e-10	2.46643e-09
1498	Itga7	6.46166	0.768393	7.7625e-10	2.56006e-09
1499	Bscl2	6.46078	1.58223	6.91639e-10	2.29473e-09
1500	Utrn	6.45691	0.977611	6.68131e-10	2.22068e-09
1501	Etfb	6.45329	0.364062	6.76973e-10	2.24919e-09
1502	Rap1gds1	6.45296	0.881603	7.10947e-10	2.35289e-09
1503	Nr2f2	6.45265	0.945306	6.991e-10	2.31818e-09
1504	Haus6	6.44871	0.979321	6.87277e-10	2.28164e-09
1505	Arfip1	6.44469	0.913774	7.21826e-10	2.38704e-09
1506	Slc25a32	6.42925	1.07397	7.73406e-10	2.55167e-09
1507	Slc25a22	6.42828	2.18883	1.24661e-09	4.02104e-09
1508	Usf3	6.42571	0.827106	1.20345e-09	3.89067e-09
1509	Stub1	6.41776	0.628298	8.65299e-10	2.84176e-09
1510	Tmem234	6.41624	0.913709	8.27786e-10	2.7237e-09
1511	Hook3	6.41487	0.799663	8.23061e-10	2.7092e-09
1512	Kpnb1	6.4102	0.752245	8.74413e-10	2.87047e-09
1513	Twf2	6.39211	1.01307	1.07888e-09	3.51059e-09
1514	Copz1	6.38797	0.509435	9.57303e-10	3.13654e-09
1515	Kcnj11	6.38415	0.796309	9.73801e-10	3.18692e-09
1516	Maip1	6.38388	0.489223	9.77985e-10	3.19938e-09
1517	Sgk1	6.37932	0.537278	1.0342e-09	3.37421e-09
1518	Msl1	6.37774	0.517258	1.09564e-09	3.56105e-09
1519	Golph3	6.37674	0.694508	1.03756e-09	3.38258e-09
1520	Usf2	6.36932	0.549772	1.22996e-09	3.97035e-09
1521	Ppp3r1	6.36745	0.582682	1.31481e-09	4.23143e-09
1522	Atad1	6.3652	0.607359	1.08085e-09	3.51566e-09
1523	Rars	6.36426	0.634074	1.11667e-09	3.62523e-09
1524	Actr8	6.34986	0.976751	1.18146e-09	3.82682e-09
1525	Ubald2	6.34823	0.358088	1.24077e-09	4.00372e-09
1526	Hint2	6.34479	0.909247	1.20199e-09	3.88742e-09
1527	Nek1	6.34344	1.182	1.21757e-09	3.93183e-09
1528	Dcaf6	6.34024	0.661436	1.27301e-09	4.10311e-09
1529	Kcnj2	6.33981	2.1824	2.05613e-09	6.49657e-09
1530	Plekha1	6.33515	0.7976	1.37716e-09	4.42706e-09
1531	Zfp207	6.33037	0.967641	1.33711e-09	4.30156e-09
1532	Cpe	6.32798	0.285525	1.44651e-09	4.63602e-09
1533	Rpn1	6.3263	0.762312	1.6954e-09	5.40374e-09
1534	Cntfr	6.31712	1.09886	1.42861e-09	4.58556e-09
1535	Naxe	6.31355	0.669044	1.44126e-09	4.62091e-09
1536	Limd1	6.303	0.875738	1.63855e-09	5.2318e-09
1537	Etfa	6.30108	0.596861	1.56213e-09	4.99904e-09
1538	Atp5mpl	6.29564	0.244175	1.60346e-09	5.1217e-09
1539	Eif4e	6.28973	0.416431	1.6506e-09	5.26833e-09
1540	Scp2	6.28949	0.604239	1.7356e-09	5.52101e-09
1541	Osbp	6.28537	0.823193	1.71008e-09	5.44388e-09
1542	Npr3	6.27776	28.674	6.15473e-09	1.88671e-08
1543	Dnajb6	6.26269	0.535053	1.89828e-09	6.02053e-09
1544	Rnf19b	6.25686	1.03523	1.95509e-09	6.1952e-09
1545	Sp1	6.2562	0.863548	1.96152e-09	6.21184e-09
1546	Klhl21	6.25558	0.615201	1.96364e-09	6.21624e-09
1547	Rbm39	6.25382	0.877133	2.06049e-09	6.50351e-09
1548	U2af1	6.25151	0.830114	2.00503e-09	6.34022e-09
1549	Cct6a	6.24503	0.470681	2.11307e-09	6.66701e-09
1550	Git1	6.23767	0.749665	2.17405e-09	6.85686e-09
1551	Apip	6.23685	0.442384	2.20584e-09	6.95198e-09
1552	Klhl40	6.2338	0.666546	2.22511e-09	7.01014e-09
1553	Rrp9	6.22712	0.99564	2.29046e-09	7.20802e-09
1554	Wdr12	6.22258	0.842652	2.71092e-09	8.49042e-09
1555	Mafk	6.21727	1.12286	2.495e-09	7.83721e-09
1556	Slc44a2	6.20483	0.567311	2.64303e-09	8.2961e-09
1557	1810013L24Rik	6.20373	0.781065	2.65983e-09	8.34576e-09
1558	Tom1	6.20285	0.822556	2.69735e-09	8.45104e-09
1559	Pigx	6.20067	0.848006	2.68711e-09	8.42205e-09
1560	Mif-ps	6.20018	0.693582	2.99603e-09	9.35244e-09
1561	Eif4e2	6.19935	0.793436	2.67076e-09	8.37696e-09
1562	Psmd12	6.19669	0.699144	2.86406e-09	8.9569e-09
1563	Epm2aip1	6.17022	0.821161	3.134e-09	9.76525e-09
1564	Klhdc3	6.16861	0.608909	3.47907e-09	1.08128e-08
1565	Lztfl1	6.16396	1.49636	3.24187e-09	1.00977e-08
1566	Acadsb	6.15734	0.573041	3.34522e-09	1.04044e-08
1567	Dyrk2	6.13427	0.793961	3.96885e-09	1.23036e-08
1568	Actc1	6.13338	1.00738	4.90028e-09	1.51031e-08
1569	Rabep2	6.12249	0.873535	4.11716e-09	1.27541e-08
1570	Rad23b	6.11816	0.53236	5.01226e-09	1.54315e-08
1571	Mcur1	6.11575	0.648278	4.2074e-09	1.30147e-08
1572	Nars	6.10995	0.496874	4.50882e-09	1.39218e-08
1573	Tomm70a	6.10973	0.637744	4.32326e-09	1.33682e-08
1574	Slc25a37	6.1088	1.13082	4.43693e-09	1.37098e-08
1575	Macf1	6.09954	0.809718	4.61126e-09	1.42329e-08
1576	Hspe1	6.09239	0.325512	4.74898e-09	1.46474e-08
1577	Hif1an	6.08573	0.684975	4.91666e-09	1.51427e-08
1578	Slc25a20	6.0832	0.811842	5.01836e-09	1.54447e-08
1579	Amotl2	6.08181	2.13465	8.0333e-09	2.44063e-08
1580	Pkig	6.07891	0.669316	5.13407e-09	1.57952e-08
1581	Ncor1	6.07322	0.550879	7.24564e-09	2.21158e-08
1582	Map1s	6.07129	0.958166	5.34377e-09	1.64284e-08
1583	Cbfa2t3	6.07017	0.908149	5.79023e-09	1.77754e-08
1584	Ube2h	6.06566	0.683053	5.93448e-09	1.8205e-08
1585	Cdk19	6.0642	0.711508	5.62988e-09	1.72956e-08
1586	E130308A19Rik	6.06356	28.822	1.70614e-08	5.08738e-08
1587	Dcn	6.04778	0.286153	6.25036e-09	1.91465e-08
1588	St8sia5	6.04326	0.612524	6.18852e-09	1.89639e-08
1589	Ubb	6.04069	0.270851	6.94857e-09	2.12167e-08
1590	Ndufab1-ps	6.03437	0.318055	6.73145e-09	2.05611e-08
1591	Cox19	6.0304	0.762182	6.66879e-09	2.03843e-08
1592	Tent5c	6.02927	29.2121	2.00561e-08	5.95326e-08
1593	Pmepa1	6.01822	0.788302	8.5721e-09	2.60247e-08
1594	Coa3	6.01452	0.527502	7.29301e-09	2.22524e-08
1595	Aebp2	6.01117	0.876329	7.34147e-09	2.23923e-08
1596	Dusp28	6.00513	0.719965	7.67826e-09	2.33861e-08
1597	Cemip2	6.00439	1.02417	7.62649e-09	2.32367e-08
1598	Rbm15	6.00364	1.09308	7.85621e-09	2.39024e-08
1599	Wbp4	5.99984	0.82258	7.92183e-09	2.40849e-08
1600	Zranb2	5.99946	0.713216	7.99848e-09	2.43092e-08
1601	Vps72	5.99772	0.602032	1.19609e-08	3.60179e-08
1602	Arl2	5.97989	0.786456	8.68468e-09	2.63571e-08
1603	Dcun1d3	5.97417	1.00515	8.9582e-09	2.71776e-08
1604	Angptl7	5.97093	28.9417	2.63802e-08	7.77896e-08
1605	Aldh1a1	5.97064	0.314556	9.3033e-09	2.82145e-08
1606	Slk	5.96511	0.983617	9.34772e-09	2.83391e-08
1607	Tor1aip1	5.9639	0.688588	9.40743e-09	2.851e-08
1608	Inpp5a	5.96127	0.71984	9.61773e-09	2.91163e-08
1609	Rab11b	5.95461	0.454245	1.00618e-08	3.04389e-08
1610	Dvl3	5.95199	0.861077	1.03327e-08	3.12143e-08
1611	Myom1	5.94752	0.314332	1.05917e-08	3.19626e-08
1612	Rbms1	5.94727	0.585557	1.02806e-08	3.10899e-08
1613	Tm9sf2	5.94658	0.577919	1.03116e-08	3.117e-08
1614	Mylk2	5.94235	0.531394	1.09521e-08	3.30386e-08
1615	Atcayos	5.93565	0.401132	1.09611e-08	3.30541e-08
1616	Podxl2	5.93342	0.939188	1.1086e-08	3.34189e-08
1617	Ube2j1	5.93099	0.609908	1.2409e-08	3.73411e-08
1618	Myoz1	5.92061	0.178344	1.51671e-08	4.53842e-08
1619	Rbm8a	5.91212	0.66975	1.29908e-08	3.90503e-08
1620	Psmb3	5.90954	0.48463	1.36506e-08	4.09327e-08
1621	Med30	5.90519	0.95107	1.28593e-08	3.86687e-08
1622	Gpx1	5.90475	0.485387	1.38063e-08	4.13705e-08
1623	Dpp9	5.90094	0.778073	1.35064e-08	4.05353e-08
1624	Ankrd17	5.89626	0.796803	1.35086e-08	4.05353e-08
1625	Tfdp2	5.89329	2.01347	1.83491e-08	5.45798e-08
1626	Usp47	5.88021	0.299955	1.48725e-08	4.45338e-08
1627	Ddit4l	5.8776	0.323499	1.50474e-08	4.50417e-08
1628	Cnot11	5.8722	0.891946	1.54515e-08	4.62026e-08
1629	Arpc5	5.87128	0.812366	1.5357e-08	4.59363e-08
1630	Nucks1	5.86622	0.62499	1.64527e-08	4.9162e-08
1631	Stip1	5.86467	0.597948	1.69709e-08	5.06217e-08
1632	1810037I17Rik	5.86262	0.448774	1.75089e-08	5.21351e-08
1633	Rbm17	5.85894	0.772378	1.75036e-08	5.21351e-08
1634	Nt5dc3	5.85756	0.75664	1.64794e-08	4.92246e-08
1635	Tgoln1	5.85417	0.702912	1.67626e-08	5.00354e-08
1636	Skp1a	5.84686	0.314264	1.74605e-08	5.20273e-08
1637	Stom	5.84585	0.743848	1.75163e-08	5.21389e-08
1638	Ccnl2	5.83182	0.825736	1.88325e-08	5.59784e-08
1639	Snrpn	5.83106	0.319236	1.88953e-08	5.61455e-08
1640	Tmsb4x	5.83037	0.321981	1.92795e-08	5.72473e-08
1641	Ifngr1	5.82752	0.879634	1.92565e-08	5.71989e-08
1642	Ivd	5.82321	0.77595	2.07853e-08	6.16327e-08
1643	Glyr1	5.82115	0.604569	2.18651e-08	6.47894e-08
1644	Aldh4a1	5.81235	0.627358	2.09723e-08	6.21655e-08
1645	Lix1l	5.81219	28.4152	5.52461e-08	1.60795e-07
1646	Sptb	5.81188	0.728731	2.41722e-08	7.14765e-08
1647	Myf6	5.81024	0.838728	2.27977e-08	6.74826e-08
1648	Zmat2	5.80815	0.482263	2.19492e-08	6.50161e-08
1649	Crat	5.78257	0.35384	2.4507e-08	7.24163e-08
1650	Urgcp	5.77812	1.00146	2.48931e-08	7.35316e-08
1651	Abcb7	5.77442	0.541493	2.53769e-08	7.49089e-08
1652	Psmc3	5.77157	0.299941	2.58621e-08	7.63148e-08
1653	Arcn1	5.77004	0.935075	2.59617e-08	7.6582e-08
1654	Eif4g3	5.76897	0.64023	2.70169e-08	7.96121e-08
1655	Eif5	5.75893	0.434613	2.90352e-08	8.54708e-08
1656	Nexn	5.75374	0.363199	3.17057e-08	9.32032e-08
1657	Mindy1	5.75167	0.689301	2.97306e-08	8.74575e-08
1658	Prkcq	5.74911	0.690212	2.89579e-08	8.52727e-08
1659	Sobp	5.73488	0.970925	3.56641e-08	1.04659e-07
1660	Samd10	5.73376	0.935853	3.16721e-08	9.31365e-08
1661	Tbc1d1	5.73313	0.887505	3.18584e-08	9.36198e-08
1662	Fermt2	5.72918	0.735595	3.36804e-08	9.88717e-08
1663	Prelid3b	5.70633	0.427759	3.60965e-08	1.05891e-07
1664	Ak1	5.69976	0.164632	3.76673e-08	1.10423e-07
1665	Sf3b1	5.6974	0.870453	3.82717e-08	1.12118e-07
1666	Btbd6	5.69517	0.653205	3.90811e-08	1.1445e-07
1667	Iws1	5.68298	0.999433	4.06184e-08	1.18911e-07
1668	Purb	5.6813	0.579562	4.17611e-08	1.22214e-07
1669	Zfp532	5.67544	0.783316	4.24133e-08	1.2408e-07
1670	Ppid	5.67238	0.836991	4.30014e-08	1.25758e-07
1671	Cst6	5.65615	0.647401	4.68935e-08	1.36999e-07
1672	Tysnd1	5.64641	0.909225	4.94369e-08	1.44281e-07
1673	Cdc5l	5.64575	0.764641	4.90803e-08	1.43321e-07
1674	Scamp1	5.64423	0.854419	4.95415e-08	1.44488e-07
1675	Foxo3	5.64315	1.92938	6.45831e-08	1.87076e-07
1676	Nop14	5.64117	0.743698	5.25874e-08	1.53161e-07
1677	Ppp1r9b	5.63995	0.93105	5.09864e-08	1.48651e-07
1678	Srp9	5.63453	0.321664	5.28356e-08	1.53831e-07
1679	Rtn3	5.62735	0.689461	5.62878e-08	1.63771e-07
1680	Rorc	5.62095	0.372736	5.68851e-08	1.65452e-07
1681	Lman1	5.61856	0.705292	5.70479e-08	1.65869e-07
1682	Stk11	5.61725	0.799332	5.74969e-08	1.67118e-07
1683	Homer1	5.61634	0.441203	5.75572e-08	1.67236e-07
1684	Senp6	5.60938	0.883857	5.90503e-08	1.71457e-07
1685	Sbk2	5.60925	0.412479	7.26324e-08	2.09822e-07
1686	Ankrd9	5.60148	0.951505	6.18356e-08	1.793e-07
1687	Dbt	5.59626	1.95439	8.31923e-08	2.3895e-07
1688	Limch1	5.59513	0.724718	6.34686e-08	1.83973e-07
1689	Cep83	5.59362	0.880817	6.39511e-08	1.85308e-07
1690	Timm9	5.58947	0.954651	6.5309e-08	1.89114e-07
1691	Pfkfb3	5.58444	0.889139	6.7327e-08	1.94892e-07
1692	Tmem246	5.58295	0.790492	6.76001e-08	1.95616e-07
1693	Plbd2	5.58088	0.891419	7.00645e-08	2.02541e-07
1694	Fam104a	5.57132	0.720852	7.43425e-08	2.14616e-07
1695	Ipo5	5.56915	0.449755	7.2767e-08	2.10139e-07
1696	Papola	5.56029	0.721542	7.96845e-08	2.29571e-07
1697	Txnl1	5.55701	0.703641	8.26537e-08	2.37563e-07
1698	Hnrnpul2	5.55488	0.756493	7.84132e-08	2.26061e-07
1699	Qrsl1	5.55282	0.799663	8.03383e-08	2.31377e-07
1700	Vmp1	5.55274	0.545336	7.90392e-08	2.27789e-07
1701	Bnip3l	5.54916	0.387427	8.11953e-08	2.33529e-07
1702	Nrd1	5.54702	0.336003	8.09063e-08	2.32776e-07
1703	Pgs1	5.54236	0.872281	8.31629e-08	2.38946e-07
1704	Dcaf5	5.54169	0.64168	8.40845e-08	2.4135e-07
1705	Ctps	5.53979	0.907379	8.38998e-08	2.40901e-07
1706	Maoa	5.5358	0.967307	8.56985e-08	2.459e-07
1707	Fam220a	5.53556	0.612175	8.75491e-08	2.51125e-07
1708	Ddx50	5.52846	0.5684	8.94143e-08	2.56389e-07
1709	Gstk1	5.52235	0.611839	9.17391e-08	2.62702e-07
1710	Lsm14a	5.51837	0.494407	9.48677e-08	2.7157e-07
1711	Csnk1g2	5.51663	0.842959	9.50816e-08	2.7209e-07
1712	Eid1	5.51098	0.524137	9.84972e-08	2.81487e-07
1713	Tmed9	5.50955	0.86033	9.7789e-08	2.79744e-07
1714	Spag9	5.50854	0.364037	9.83502e-08	2.81161e-07
1715	Anxa4	5.48748	0.795462	1.09402e-07	3.12232e-07
1716	Znrf1	5.47428	0.852501	1.21365e-07	3.46142e-07
1717	Rbl2	5.46935	0.754039	1.21782e-07	3.47216e-07
1718	2310057M21Rik	5.46636	0.887057	1.25194e-07	3.56825e-07
1719	Mrps5	5.46377	0.803424	1.35351e-07	3.85644e-07
1720	Pdap1	5.44996	0.504251	1.41501e-07	4.02896e-07
1721	Ppp1r14c	5.44122	0.583193	1.51686e-07	4.30745e-07
1722	Lamc1	5.43278	0.826488	1.4313e-07	4.07398e-07
1723	Slc27a1	5.43145	0.664296	1.48654e-07	4.22558e-07
1724	Dync1li2	5.42961	0.670987	1.50498e-07	4.27516e-07
1725	Fam131a	5.42638	0.728173	1.48155e-07	4.2142e-07
1726	Prkag1	5.42528	0.702646	1.4892e-07	4.23174e-07
1727	Tubb5	5.42152	0.456212	1.54176e-07	4.3767e-07
1728	Acadvl	5.405	0.686957	1.78271e-07	5.03723e-07
1729	Bace1	5.40322	0.753924	1.70529e-07	4.82806e-07
1730	Lars	5.39808	0.796862	1.69929e-07	4.81269e-07
1731	Kifap3	5.39798	0.770001	1.72344e-07	4.87784e-07
1732	Cxcl14	5.39644	0.720296	1.76707e-07	4.99799e-07
1733	Exoc2	5.39284	0.893481	1.77465e-07	5.0172e-07
1734	Pnkd	5.39169	0.732557	1.76561e-07	4.99553e-07
1735	Ergic2	5.39032	0.56145	1.79376e-07	5.06676e-07
1736	Tardbp	5.3897	0.521531	1.77504e-07	5.0172e-07
1737	Ndufa2	5.37972	0.280394	2.02685e-07	5.70814e-07
1738	Fn3k	5.37835	0.924539	1.88117e-07	5.31015e-07
1739	Fam193a	5.37796	0.919425	1.88115e-07	5.31015e-07
1740	Kat2b	5.37623	0.886038	1.90355e-07	5.37154e-07
1741	Pum2	5.37179	0.296776	1.96279e-07	5.53688e-07
1742	Mrps12	5.36989	0.747021	1.99656e-07	5.6247e-07
1743	Smad1	5.36912	0.768115	1.96853e-07	5.55122e-07
1744	Slc9a2	5.36815	0.69461	2.18139e-07	6.13526e-07
1745	Mtus1	5.36682	0.543821	1.9873e-07	5.60044e-07
1746	Smim19	5.36276	0.411344	2.20726e-07	6.20595e-07
1747	Surf4	5.35904	0.47154	2.09786e-07	5.90423e-07
1748	Asb8	5.35545	0.46059	2.36363e-07	6.63467e-07
1749	Cwf19l2	5.35384	1.80352	2.57161e-07	7.20661e-07
1750	Gpihbp1	5.35355	0.815904	2.12751e-07	5.98569e-07
1751	Mif	5.34654	0.264126	2.21165e-07	6.21626e-07
1752	Fam114a2	5.34265	0.513205	2.23628e-07	6.28341e-07
1753	Ppp2r5a	5.34142	0.642953	2.28163e-07	6.40872e-07
1754	Ap1g1	5.33718	0.823322	2.30986e-07	6.48586e-07
1755	Cdkal1	5.33016	0.56467	2.427e-07	6.81031e-07
1756	Uqcc1	5.32333	0.657499	2.47617e-07	6.946e-07
1757	Tsta3	5.32065	0.913451	2.51368e-07	7.0489e-07
1758	Zfp787	5.31617	0.665295	2.58115e-07	7.23096e-07
1759	Mtres1	5.30855	0.450026	2.64453e-07	7.40363e-07
1760	Zfp24	5.30284	0.849749	2.72186e-07	7.61513e-07
1761	Cacul1	5.30281	0.640709	2.72016e-07	7.61287e-07
1762	Aprt	5.29937	0.756727	2.76391e-07	7.72517e-07
1763	Gtpbp1	5.29932	0.794196	2.75782e-07	7.7132e-07
1764	Pih1d1	5.29887	0.648479	2.77788e-07	7.76168e-07
1765	Top2b	5.29497	0.603771	2.9422e-07	8.20734e-07
1766	Arf6	5.29311	0.784411	2.88741e-07	8.05978e-07
1767	Phb	5.29273	0.379345	2.84978e-07	7.95734e-07
1768	Rpf1	5.28965	1.75679	3.48335e-07	9.6852e-07
1769	Sfpq	5.28888	0.769456	2.90182e-07	8.09736e-07
1770	Cycs	5.28534	0.185701	2.97908e-07	8.30749e-07
1771	Xpr1	5.28017	0.622315	3.03021e-07	8.44731e-07
1772	Coq3	5.27989	0.774306	3.04218e-07	8.47793e-07
1773	Sh3glb1	5.27836	0.362261	3.71639e-07	1.03197e-06
1774	Agpat5	5.27565	0.468999	3.13909e-07	8.74513e-07
1775	Dhx15	5.2709	0.746203	3.16827e-07	8.82352e-07
1776	Med24	5.26517	0.683054	3.5075e-07	9.74914e-07
1777	Rabgef1	5.26254	0.72639	3.30421e-07	9.1931e-07
1778	Cox14	5.25941	0.392531	3.59967e-07	9.99882e-07
1779	Chac1	5.24766	0.988852	3.73067e-07	1.0356e-06
1780	Sbds	5.24476	0.896077	3.95521e-07	1.09578e-06
1781	Ano5	5.23144	0.35489	3.84158e-07	1.06604e-06
1782	Pum1	5.23027	0.592856	4.22846e-07	1.16845e-06
1783	Sf3b6	5.228	0.54921	3.89956e-07	1.08142e-06
1784	Foxj3	5.2257	0.645918	4.02555e-07	1.11418e-06
1785	Ndufb9	5.22524	0.202191	3.96392e-07	1.09748e-06
1786	Aqp1	5.22475	0.550224	3.9604e-07	1.09686e-06
1787	Ralbp1	5.22253	0.609471	4.08585e-07	1.12977e-06
1788	Cpt2	5.22109	0.739169	4.03366e-07	1.11607e-06
1789	Hsph1	5.21542	0.81491	4.1414e-07	1.14476e-06
1790	Ighm	5.21052	0.846121	4.31849e-07	1.19178e-06
1791	Eri3	5.20937	0.493807	4.26358e-07	1.17739e-06
1792	Enpp4	5.20843	0.793264	4.29604e-07	1.18597e-06
1793	Usp5	5.20389	0.776835	4.39298e-07	1.21194e-06
1794	Ado	5.20207	0.839081	4.45162e-07	1.22773e-06
1795	Cldnd1	5.1956	0.703639	4.57851e-07	1.2619e-06
1796	Coasy	5.18829	0.869008	4.71649e-07	1.29951e-06
1797	Nfil3	5.18161	1.74566	5.73578e-07	1.57475e-06
1798	Mfsd5	5.17792	0.768693	5.0449e-07	1.38955e-06
1799	Nedd4	5.1612	0.277256	5.37747e-07	1.47972e-06
1800	Maf	5.16017	0.400204	5.4658e-07	1.50354e-06
1801	Ddrgk1	5.15745	0.650955	5.54579e-07	1.52455e-06
1802	Psmd13	5.15675	0.725976	5.48476e-07	1.50827e-06
1803	Rdm1	5.15023	0.64256	5.66459e-07	1.55621e-06
1804	Wipi1	5.14758	0.634295	5.73206e-07	1.57424e-06
1805	B4galt1	5.14654	1.71815	6.71148e-07	1.8373e-06
1806	Snrpg	5.13526	0.656566	6.10863e-07	1.67604e-06
1807	Ss18l2	5.13406	0.371835	6.30397e-07	1.72852e-06
1808	Sec63	5.13397	0.803361	6.18395e-07	1.69616e-06
1809	Pdzrn3	5.1158	0.626681	6.88733e-07	1.88484e-06
1810	Vamp3	5.10616	0.596801	7.00175e-07	1.91553e-06
1811	Vegfa	5.10569	0.604616	7.023e-07	1.92073e-06
1812	Ltbp3	5.10435	0.825394	7.03877e-07	1.92443e-06
1813	Kpna4	5.10321	0.556787	7.69381e-07	2.09545e-06
1814	Naxd	5.10069	0.667453	7.2717e-07	1.98493e-06
1815	Ptges3l	5.10002	0.51613	7.18532e-07	1.96261e-06
1816	Pcnx	5.09413	0.639085	7.46635e-07	2.03545e-06
1817	Scn4b	5.09407	0.468313	7.39751e-07	2.01733e-06
1818	Sgms1	5.0879	0.597377	8.35079e-07	2.26858e-06
1819	Fkbp1a	5.08675	0.206814	7.73577e-07	2.10553e-06
1820	Ralgapb	5.08645	0.766935	7.65966e-07	2.08749e-06
1821	Etl4	5.08197	0.733449	7.88088e-07	2.14434e-06
1822	Gna13	5.08082	0.772992	7.89392e-07	2.14721e-06
1823	Cct3	5.07022	0.661455	8.61963e-07	2.33938e-06
1824	Ramp2	5.06992	0.524811	8.28272e-07	2.25152e-06
1825	Acadm	5.06968	0.497793	8.37662e-07	2.27487e-06
1826	Chic2	5.05478	0.606103	8.97096e-07	2.43241e-06
1827	Syf2	5.05147	0.574366	9.2235e-07	2.50009e-06
1828	Trip11	5.05065	1.62572	1.01989e-06	2.75834e-06
1829	Clns1a	5.04572	0.57579	1.09708e-06	2.96146e-06
1830	Mrps27	5.04178	0.557011	9.54336e-07	2.58596e-06
1831	Ctdsp2	5.02949	0.543705	1.01124e-06	2.73581e-06
1832	Sarnp	5.01945	0.653324	1.05025e-06	2.83865e-06
1833	Vps13a	5.01594	0.835448	1.072e-06	2.8956e-06
1834	Hspa4	5.0152	0.685278	1.07601e-06	2.9055e-06
1835	Ube3b	5.01069	0.55861	1.10338e-06	2.97752e-06
1836	Dusp23	5.008	0.850838	1.11266e-06	3.00066e-06
1837	C1qc	5.00559	0.986171	1.12594e-06	3.0355e-06
1838	Samd1	4.99769	0.780698	1.16566e-06	3.14159e-06
1839	Eapp	4.99643	0.873292	1.17011e-06	3.15261e-06
1840	Nus1	4.99626	0.681239	1.17233e-06	3.1576e-06
1841	Cyb5b	4.99445	0.518339	1.18002e-06	3.17729e-06
1842	Armc8	4.99258	0.591074	1.19035e-06	3.20411e-06
1843	Apoe	4.98678	0.550938	1.22376e-06	3.29298e-06
1844	Capn1	4.98534	0.82247	1.23115e-06	3.31183e-06
1845	Apbb3	4.98379	1.69294	1.41212e-06	3.78431e-06
1846	Mef2a	4.979	0.74578	1.2833e-06	3.44992e-06
1847	Cst3	4.97463	0.2803	1.30019e-06	3.49425e-06
1848	Tef	4.97188	0.466947	1.33559e-06	3.58712e-06
1849	Sp2	4.97165	0.916311	1.32329e-06	3.55521e-06
1850	Tagln	4.96525	1.71374	1.57222e-06	4.19947e-06
1851	Eif4ebp1	4.9645	1.73901	1.50508e-06	4.02583e-06
1852	Abhd4	4.96311	0.695195	1.39174e-06	3.73321e-06
1853	Mta2	4.96166	0.885134	1.37823e-06	3.69813e-06
1854	Ptgr2	4.95802	0.398473	1.42449e-06	3.81627e-06
1855	Ccdc124	4.95702	0.395326	1.43787e-06	3.84968e-06
1856	Iqgap1	4.95295	0.811298	1.43151e-06	3.83385e-06
1857	Slc29a1	4.94398	0.614153	1.49813e-06	4.00849e-06
1858	S1pr1	4.94133	1.75174	1.72825e-06	4.6089e-06
1859	Ostc	4.93605	0.646038	1.54774e-06	4.13604e-06
1860	Tmem160	4.93379	0.440809	1.57274e-06	4.19947e-06
1861	Eif2ak1	4.93356	0.566528	1.57295e-06	4.19947e-06
1862	Rhou	4.92858	1.64516	1.83614e-06	4.88682e-06
1863	Qk	4.92221	0.416524	1.72744e-06	4.6089e-06
1864	Pmpca	4.9122	0.752987	1.72847e-06	4.6089e-06
1865	Taldo1	4.91148	0.524044	1.78924e-06	4.76645e-06
1866	Ensa	4.9089	0.652714	1.78314e-06	4.75319e-06
1867	Bmi1	4.90886	0.597802	1.78627e-06	4.76003e-06
1868	Ppm1b	4.90336	0.254381	1.80373e-06	4.80355e-06
1869	Lnpep	4.90206	0.736458	1.81181e-06	4.82358e-06
1870	Dag1	4.8974	0.716808	1.86622e-06	4.96532e-06
1871	Tmed2	4.89655	0.29336	1.86787e-06	4.96816e-06
1872	Prkaa2	4.89564	0.215551	1.89416e-06	5.03652e-06
1873	Pfdn2	4.88899	0.33587	1.98672e-06	5.2662e-06
1874	Hmga1	4.88846	0.553981	1.96949e-06	5.2254e-06
1875	Mtap	4.88724	0.686371	1.93869e-06	5.15169e-06
1876	Capza2	4.88628	0.251628	1.96154e-06	5.20594e-06
1877	Arhgap10	4.88554	0.682369	1.97833e-06	5.24723e-06
1878	Rnf166	4.87592	0.719577	2.05854e-06	5.45489e-06
1879	Atp6v1d	4.85503	0.312397	2.24597e-06	5.94414e-06
1880	Pxmp2	4.8507	0.546949	2.29156e-06	6.06293e-06
1881	Ttll7	4.84071	0.4401	2.39766e-06	6.34167e-06
1882	Alkbh5	4.84064	0.668885	2.44581e-06	6.46701e-06
1883	Atxn7	4.83102	1.6968	2.85736e-06	7.52021e-06
1884	Mrfap1	4.82911	0.192462	2.5967e-06	6.8596e-06
1885	Otud7b	4.82512	0.722636	2.59423e-06	6.85519e-06
1886	Alkbh3	4.82479	0.498055	2.78269e-06	7.33502e-06
1887	Erp44	4.82276	0.714776	2.64898e-06	6.99338e-06
1888	Ccdc47	4.82098	0.381962	2.82026e-06	7.42944e-06
1889	Exoc3	4.82021	0.669409	2.64869e-06	6.99338e-06
1890	Snrnp200	4.81789	0.710598	2.69772e-06	7.11764e-06
1891	Dusp27	4.81323	0.500951	2.7244e-06	7.18581e-06
1892	Tmem50b	4.81142	0.745234	2.76454e-06	7.28941e-06
1893	Nras	4.8073	0.682116	2.79187e-06	7.35693e-06
1894	Tmem9b	4.80478	0.563515	2.82308e-06	7.43458e-06
1895	Dnajc5	4.79952	0.665635	2.89356e-06	7.61314e-06
1896	Ppme1	4.79425	0.833255	2.96242e-06	7.78948e-06
1897	Prune1	4.79025	0.67124	3.09982e-06	8.13571e-06
1898	Tbcb	4.78754	0.396914	3.27129e-06	8.58046e-06
1899	Ubxn2a	4.77153	0.798689	3.28566e-06	8.6155e-06
1900	Pef1	4.76876	0.461549	3.33328e-06	8.73769e-06
1901	Col4a1	4.76085	0.615554	3.44379e-06	9.02459e-06
1902	Ywhae	4.75542	0.225743	3.56966e-06	9.34581e-06
1903	Coro2b	4.75391	0.930071	3.55243e-06	9.30644e-06
1904	Abra	4.75333	0.266349	3.69143e-06	9.65573e-06
1905	Mtfr1l	4.75177	0.225746	3.5869e-06	9.38807e-06
1906	Tsr1	4.74856	1.57726	4.05865e-06	1.05935e-05
1907	Bcl10	4.74742	1.57434	4.06477e-06	1.06062e-05
1908	Dusp18	4.7461	1.64304	4.12134e-06	1.07506e-05
1909	Specc1l	4.73959	0.606043	3.90465e-06	1.02041e-05
1910	Drap1	4.7393	0.363131	3.86818e-06	1.01118e-05
1911	Abcf3	4.73588	0.762439	3.85324e-06	1.00759e-05
1912	Fam234a	4.73231	0.772685	3.92694e-06	1.0256e-05
1913	Ndufb5	4.72152	0.197494	4.16116e-06	1.08478e-05
1914	Thoc2	4.70915	1.60128	4.65422e-06	1.21146e-05
1915	Fam111a	4.70832	1.61947	4.89123e-06	1.2716e-05
1916	Psmc1	4.70575	0.378078	4.40822e-06	1.14848e-05
1917	Dennd5a	4.70566	0.470796	4.46565e-06	1.16309e-05
1918	Vdac3	4.69931	0.149499	4.56761e-06	1.18928e-05
1919	Fyttd1	4.69391	0.544541	4.66691e-06	1.21439e-05
1920	Efr3a	4.6849	0.469368	4.89426e-06	1.272e-05
1921	Pabpc4	4.68319	0.309523	4.91133e-06	1.27566e-05
1922	Ppp6r3	4.68303	0.649254	4.9228e-06	1.27825e-05
1923	H1f0	4.68249	0.313245	4.89765e-06	1.27249e-05
1924	Asf1a	4.67919	0.8329	5.06745e-06	1.31501e-05
1925	Ggnbp1	4.66954	0.503418	5.22645e-06	1.35462e-05
1926	Tbpl1	4.66943	0.750536	5.18576e-06	1.34489e-05
1927	Tmem126a	4.66908	0.661169	5.20416e-06	1.34925e-05
1928	Tmem33	4.66243	0.766416	5.40533e-06	1.40013e-05
1929	Fabp3	4.65187	0.282333	5.8439e-06	1.51189e-05
1930	Tgfbr3	4.65065	1.51058	6.05528e-06	1.56373e-05
1931	2810004N23Rik	4.64473	0.753122	5.84765e-06	1.5124e-05
1932	Klhl33	4.64034	0.687418	5.89768e-06	1.52488e-05
1933	Ptk2	4.63886	0.746853	5.93197e-06	1.53328e-05
1934	Kpna3	4.63738	0.409464	6.07256e-06	1.56724e-05
1935	Mrpl51	4.63388	0.170374	6.12464e-06	1.57973e-05
1936	Tmcc1	4.62991	0.524523	6.21568e-06	1.60224e-05
1937	Cygb	4.62889	0.676923	6.21143e-06	1.60163e-05
1938	Klhl9	4.61957	0.697754	6.46923e-06	1.66709e-05
1939	Map2k2	4.61656	0.533986	6.67313e-06	1.71808e-05
1940	Fam210a	4.61318	0.556252	6.95067e-06	1.78684e-05
1941	Pdlim7	4.60788	0.229881	6.86336e-06	1.76546e-05
1942	Ilrun	4.60472	0.420649	6.92012e-06	1.77952e-05
1943	Rnf150	4.60272	0.709596	7.10846e-06	1.82685e-05
1944	Phf12	4.595	0.729349	7.28824e-06	1.87249e-05
1945	Msmo1	4.59185	0.827876	7.29443e-06	1.87351e-05
1946	Setd3	4.5881	0.500296	7.47046e-06	1.91815e-05
1947	Snrnp27	4.5754	0.447776	7.8678e-06	2.01835e-05
1948	Cul2	4.57028	0.702082	8.02148e-06	2.05715e-05
1949	Hp1bp3	4.56526	0.638518	8.45033e-06	2.16582e-05
1950	Rragd	4.56022	0.554393	8.3781e-06	2.14796e-05
1951	Glud1	4.55527	0.42903	8.56721e-06	2.19446e-05
1952	Echs1	4.55199	0.577754	8.69043e-06	2.22535e-05
1953	Ctdsp1	4.55078	0.388726	8.74221e-06	2.23794e-05
1954	Cul5	4.54582	0.464076	8.91842e-06	2.28168e-05
1955	Erh	4.5456	0.445246	9.04854e-06	2.31358e-05
1956	Polr2c	4.54211	0.55902	9.0703e-06	2.31845e-05
1957	Celf1	4.53484	0.613459	9.3626e-06	2.39245e-05
1958	Zyg11b	4.53072	0.68743	9.59309e-06	2.44988e-05
1959	Gnb1	4.52701	0.556786	9.84854e-06	2.51361e-05
1960	Tmed4	4.5246	0.679927	9.79916e-06	2.50175e-05
1961	Spns2	4.52366	0.73381	9.85623e-06	2.51406e-05
1962	Arl4a	4.52195	0.788747	9.94091e-06	2.5349e-05
1963	Hcfc2	4.51133	0.636517	1.03794e-05	2.64592e-05
1964	Aldh5a1	4.50977	1.62963	1.15853e-05	2.9454e-05
1965	Slain2	4.50857	0.383162	1.05206e-05	2.68033e-05
1966	Ube2z	4.5075	1.45356	1.11713e-05	2.84183e-05
1967	Enah	4.50324	0.547362	1.08678e-05	2.76795e-05
1968	Rnf220	4.50001	0.537037	1.09087e-05	2.77754e-05
1969	Arntl	4.4992	1.45269	1.16193e-05	2.95317e-05
1970	Mfn1	4.48817	0.300025	1.14823e-05	2.92008e-05
1971	BC003965	4.48474	0.74247	1.16677e-05	2.96459e-05
1972	Ogt	4.47886	0.794117	1.19174e-05	3.02624e-05
1973	Tnik	4.47849	0.7708	1.19881e-05	3.04328e-05
1974	Sgta	4.47435	0.573511	1.21622e-05	3.08654e-05
1975	Usp15	4.47333	0.327018	1.22966e-05	3.1188e-05
1976	Cacna1s	4.47116	0.378526	1.30257e-05	3.29686e-05
1977	Sms	4.47084	0.497962	1.25031e-05	3.17023e-05
1978	Smc1a	4.46776	0.700289	1.26658e-05	3.20861e-05
1979	Itsn1	4.46646	0.507769	1.25931e-05	3.19116e-05
1980	Pink1	4.46073	0.308236	1.35398e-05	3.42189e-05
1981	Orai1	4.45967	0.560253	1.29444e-05	3.27724e-05
1982	Ppfibp2	4.45748	1.53287	1.4043e-05	3.5459e-05
1983	Igfbp4	4.4562	0.56082	1.31466e-05	3.32547e-05
1984	Wbp11	4.45162	1.4565	1.41347e-05	3.56802e-05
1985	Cdh13	4.43587	0.379563	1.44209e-05	3.63811e-05
1986	Herpud2	4.42884	1.46538	1.57779e-05	3.97337e-05
1987	Slc6a8	4.42546	0.660999	1.50643e-05	3.79703e-05
1988	Cat	4.41704	0.717547	1.5788e-05	3.97475e-05
1989	G3bp2	4.41675	0.512999	1.55394e-05	3.91563e-05
1990	Vapb	4.4118	0.388471	1.7095e-05	4.29619e-05
1991	Pam16	4.41013	0.378195	1.59925e-05	4.02506e-05
1992	Yeats4	4.4079	0.496037	1.66117e-05	4.17841e-05
1993	Tbc1d15	4.40593	1.49724	1.76282e-05	4.42366e-05
1994	Pcnt	4.4036	1.41935	1.73761e-05	4.36296e-05
1995	Nfkb1	4.39965	0.695832	1.67603e-05	4.21455e-05
1996	Zfp622	4.39647	0.757773	1.6973e-05	4.26679e-05
1997	Carnmt1	4.39563	0.189475	1.74252e-05	4.374e-05
1998	Rab5c	4.39428	0.517779	1.73416e-05	4.35559e-05
[truncated: 6,523 more rows]
