# Supplementary material for: Compartment-specific remodeling of skeletal muscle in Duchenne muscular dystrophy
Source: Research Square preprint supplement (doi:10.21203/rs.3.rs-8852148/v1), 2026-02-23
Supplement: Supplementary file 5 [file cdd1d81eb0430396cedef92d.xlsx]

## Sheet: Sections metadata
	Section	Sample	Condition	Replicates	batch	Region	leiden	annotation	Transcript counts	PC1	PC2
0	001	WT	Controls	WT-1	batch1	Proximal	3	Central	117957	40.26	40.26
1	002	WT	Controls	WT-1	batch1	Central	1	Central	399832	4.81002	4.81002
2	003	WT	Controls	WT-1	batch1	Central	1	Central	328972	2.21881	2.21881
3	004	WT	Controls	WT-1	batch1	Central	1	Central	233893	11.6739	11.6739
4	005	WT	Controls	WT-1	batch1	Central	3	Central	223444	23.365	23.365
5	006	WT	Controls	WT-1	batch1	Central	3	Central	338257	16.1549	16.1549
6	007	WT	Controls	WT-1	batch1	Central	1	Central	420851	8.18439	8.18439
7	008	WT	Controls	WT-1	batch1	Central	1	Central	332336	8.20984	8.20984
8	009	WT	Controls	WT-1	batch1	Central	1	Central	514842	11.7395	11.7395
9	010	WT	Controls	WT-1	batch1	Central	2	Central	368890	0.952065	0.952065
10	011	WT	Controls	WT-1	batch1	Central	1	Central	363808	11.6174	11.6174
11	012	WT	Controls	WT-1	batch1	Central	3	Central	652760	19.8306	19.8306
12	013	WT	Controls	WT-1	batch1	Central	1	Central	449281	6.39101	6.39101
13	014	WT	Controls	WT-1	batch1	Central	1	Central	480989	11.8515	11.8515
14	015	WT	Controls	WT-1	batch1	Central	3	Central	486158	17.4488	17.4488
15	016	WT	Controls	WT-1	batch1	Central	3	Central	417453	13.2559	13.2559
16	017	WT	Controls	WT-1	batch1	Central	3	Central	386047	12.4296	12.4296
17	018	WT	Controls	WT-1	batch1	Central	3	Central	517370	9.37901	9.37901
18	019	WT	Controls	WT-1	batch1	Central	2	Central	297978	-5.29138	-5.29138
19	020	WT	Controls	WT-1	batch1	Central	2	Central	737051	2.59088	2.59088
20	021	WT	Controls	WT-1	batch1	Central	1	Central	812364	5.55344	5.55344
21	022	WT	Controls	WT-1	batch1	Central	1	Central	684407	3.66764	3.66764
22	023	WT	Controls	WT-1	batch1	Central	2	Central	402421	-3.77797	-3.77797
23	024	WT	Controls	WT-1	batch1	Central	2	Central	412189	-12.1787	-12.1787
24	025	WT	Controls	WT-1	batch1	Central	2	Central	675776	-14.4307	-14.4307
25	026	WT	Controls	WT-1	batch1	Central	2	Central	440255	-13.4012	-13.4012
26	027	WT	Controls	WT-1	batch1	Central	2	Central	396311	-3.59694	-3.59694
27	028	WT	Controls	WT-1	batch1	Distal	2	Central	254186	-2.17744	-2.17744
28	029	WT	Controls	WT-1	batch1	Distal	0	Proximal-distal	256715	-17.38	-17.38
29	030	WT	Controls	WT-1	batch1	Distal	1	Central	598705	-1.47471	-1.47471
30	031	WT	Controls	WT-1	batch1	Distal	0	Proximal-distal	726301	-13.1282	-13.1282
31	032	WT	Controls	WT-1	batch1	Distal	0	Proximal-distal	645133	-8.37888	-8.37888
32	033	WT	Controls	WT-1	batch1	Distal	0	Proximal-distal	325242	-10.105	-10.105
33	034	WT	Controls	WT-1	batch1	Distal	0	Proximal-distal	588482	-12.5099	-12.5099
34	035	WT	Controls	WT-1	batch1	Distal	0	Proximal-distal	636086	-15.2191	-15.2191
35	036	WT	Controls	WT-1	batch1	Distal	0	Proximal-distal	533266	-14.7027	-14.7027
36	037	WT	Controls	WT-1	batch1	Distal	0	Proximal-distal	386769	-14.0877	-14.0877
37	038	WT	Controls	WT-1	batch1	Distal	0	Proximal-distal	484861	-10.7638	-10.7638
38	039	WT	Controls	WT-1	batch1	Distal	0	Proximal-distal	270350	-20.4998	-20.4998
39	040	WT	Controls	WT-1	batch1	Distal	0	Proximal-distal	332738	-16.479	-16.479
40	041	WT	Controls	WT-1	batch1	Distal	0	Proximal-distal	158386	-10.3865	-10.3865
41	042	WT	Controls	WT-1	batch1	Distal	0	Proximal-distal	172677	-1.36274	-1.36274
42	043	WT	Controls	WT-1	batch1	Distal	0	Proximal-distal	162079	-12.2505	-12.2505
43	044	WT	Controls	WT-1	batch1	Distal	0	Proximal-distal	180276	3.82791	3.82791
44	045	WT	Controls	WT-1	batch1	Distal	0	Proximal-distal	209779	-7.42292	-7.42292
45	046	WT	Controls	WT-1	batch1	Distal	0	Proximal-distal	196317	7.97934	7.97934
46	047	WT	Controls	WT-1	batch1	Distal	0	Proximal-distal	114551	-12.3855	-12.3855
47	001	WT	Controls	WT-2	batch1	Proximal	1	Central	86509	-2.23037	-2.23037
48	002	WT	Controls	WT-2	batch1	Proximal	1	Central	104515	-6.00639	-6.00639
49	003	WT	Controls	WT-2	batch1	Proximal	1	Central	102543	3.36247	3.36247
50	004	WT	Controls	WT-2	batch1	Proximal	1	Central	105370	-3.43585	-3.43585
51	005	WT	Controls	WT-2	batch1	Proximal	1	Central	110972	2.79119	2.79119
52	006	WT	Controls	WT-2	batch1	Central	1	Central	174782	9.55975	9.55975
53	007	WT	Controls	WT-2	batch1	Central	3	Central	173606	24.1128	24.1128
54	008	WT	Controls	WT-2	batch1	Central	3	Central	233025	14.1496	14.1496
55	009	WT	Controls	WT-2	batch1	Central	3	Central	238893	15.9267	15.9267
56	010	WT	Controls	WT-2	batch1	Central	1	Central	177383	5.40362	5.40362
57	011	WT	Controls	WT-2	batch1	Central	3	Central	237009	18.0928	18.0928
58	012	WT	Controls	WT-2	batch1	Central	1	Central	35028.6	8.32104	8.32104
59	013	WT	Controls	WT-2	batch1	Central	1	Central	235817	6.23324	6.23324
60	014	WT	Controls	WT-2	batch1	Central	1	Central	264006	10.2387	10.2387
61	015	WT	Controls	WT-2	batch1	Central	1	Central	118837	8.78384	8.78384
62	016	WT	Controls	WT-2	batch1	Central	2	Central	173987	2.20683	2.20683
63	017	WT	Controls	WT-2	batch1	Central	3	Central	188739	16.5755	16.5755
64	018	WT	Controls	WT-2	batch1	Central	3	Central	245544	8.50486	8.50486
65	019	WT	Controls	WT-2	batch1	Central	3	Central	292069	16.1721	16.1721
66	020	WT	Controls	WT-2	batch1	Central	1	Central	593069	10.4303	10.4303
67	021	WT	Controls	WT-2	batch1	Central	3	Central	484538	14.8319	14.8319
68	022	WT	Controls	WT-2	batch1	Central	3	Central	492477	15.5001	15.5001
69	023	WT	Controls	WT-2	batch1	Central	3	Central	381093	21.1035	21.1035
70	024	WT	Controls	WT-2	batch1	Central	1	Central	294009	14.806	14.806
71	025	WT	Controls	WT-2	batch1	Central	1	Central	389003	11.4139	11.4139
72	026	WT	Controls	WT-2	batch1	Central	1	Central	516157	6.37334	6.37334
73	027	WT	Controls	WT-2	batch1	Central	1	Central	201909	1.59594	1.59594
74	028	WT	Controls	WT-2	batch1	Central	1	Central	233522	9.46156	9.46156
75	029	WT	Controls	WT-2	batch1	Central	3	Central	179894	10.4171	10.4171
76	030	WT	Controls	WT-2	batch1	Central	1	Central	311589	8.34677	8.34677
77	031	WT	Controls	WT-2	batch1	Central	2	Central	519335	3.17409	3.17409
78	032	WT	Controls	WT-2	batch1	Central	1	Central	296062	10.639	10.639
79	033	WT	Controls	WT-2	batch1	Central	1	Central	276703	10.1481	10.1481
80	034	WT	Controls	WT-2	batch1	Central	1	Central	275092	12.7604	12.7604
81	035	WT	Controls	WT-2	batch1	Central	2	Central	623272	5.37767	5.37767
82	036	WT	Controls	WT-2	batch1	Central	2	Central	554406	2.88069	2.88069
83	037	WT	Controls	WT-2	batch1	Central	1	Central	239621	-2.68656	-2.68656
84	038	WT	Controls	WT-2	batch1	Central	2	Central	358582	-2.06791	-2.06791
85	039	WT	Controls	WT-2	batch1	Central	2	Central	205767	1.38914	1.38914
86	040	WT	Controls	WT-2	batch1	Central	2	Central	293204	4.95637	4.95637
87	041	WT	Controls	WT-2	batch1	Central	2	Central	120138	-1.01243	-1.01243
88	042	WT	Controls	WT-2	batch1	Central	2	Central	287053	0.190271	0.190271
89	043	WT	Controls	WT-2	batch1	Distal	2	Central	172011	-1.29621	-1.29621
90	044	WT	Controls	WT-2	batch1	Distal	0	Proximal-distal	174038	-10.7417	-10.7417
91	045	WT	Controls	WT-2	batch1	Distal	0	Proximal-distal	255227	-8.92384	-8.92384
92	046	WT	Controls	WT-2	batch1	Distal	0	Proximal-distal	267614	-14.0031	-14.0031
93	047	WT	Controls	WT-2	batch1	Distal	0	Proximal-distal	297634	-11.8591	-11.8591
94	048	WT	Controls	WT-2	batch1	Distal	0	Proximal-distal	305629	-4.07159	-4.07159
95	049	WT	Controls	WT-2	batch1	Distal	0	Proximal-distal	236308	-15.5543	-15.5543
96	050	WT	Controls	WT-2	batch1	Distal	0	Proximal-distal	100236	-29.4691	-29.4691
97	051	WT	Controls	WT-2	batch1	Distal	0	Proximal-distal	162699	-10.2468	-10.2468
98	052	WT	Controls	WT-2	batch1	Distal	0	Proximal-distal	180420	-18.9557	-18.9557
99	053	WT	Controls	WT-2	batch1	Distal	0	Proximal-distal	178381	-10.3	-10.3
100	054	WT	Controls	WT-2	batch1	Distal	0	Proximal-distal	186674	-12.6168	-12.6168
101	055	WT	Controls	WT-2	batch1	Distal	0	Proximal-distal	170214	-6.16514	-6.16514
102	056	WT	Controls	WT-2	batch1	Distal	0	Proximal-distal	111310	-4.8725	-4.8725
103	057	WT	Controls	WT-2	batch1	Distal	0	Proximal-distal	204967	-9.19165	-9.19165
104	058	WT	Controls	WT-2	batch1	Distal	0	Proximal-distal	91191.5	-20.852	-20.852
105	059	WT	Controls	WT-2	batch1	Distal	0	Proximal-distal	98821.4	-16.3905	-16.3905
106	060	WT	Controls	WT-2	batch1	Distal	2	Central	81215.2	-29.3145	-29.3145
107	061	WT	Controls	WT-2	batch1	Distal	0	Proximal-distal	61862.7	-31.3504	-31.3504
108	062	WT	Controls	WT-2	batch1	Distal	0	Proximal-distal	60645.1	-19.7582	-19.7582
109	063	WT	Controls	WT-2	batch1	Distal	0	Proximal-distal	43448.9	-23.5062	-23.5062
110	064	WT	Controls	WT-2	batch1	Distal	0	Proximal-distal	39246.3	-19.3522	-19.3522
111	001	Ctr	Controls	Ctr-1	batch2	Proximal	0	Proximal-distal	59801.7	-2.9773	-2.9773
112	002	Ctr	Controls	Ctr-1	batch2	Proximal	1	Central	63646.3	-4.26433	-4.26433
113	003	Ctr	Controls	Ctr-1	batch2	Proximal	3	Central	194893	9.90855	9.90855
114	004	Ctr	Controls	Ctr-1	batch2	Central	3	Central	430088	27.7108	27.7108
115	005	Ctr	Controls	Ctr-1	batch2	Central	3	Central	232894	14.0501	14.0501
116	006	Ctr	Controls	Ctr-1	batch2	Central	3	Central	198402	13.3192	13.3192
117	007	Ctr	Controls	Ctr-1	batch2	Central	2	Central	116419	-8.88595	-8.88595
118	008	Ctr	Controls	Ctr-1	batch2	Central	3	Central	226779	15.6927	15.6927
119	009	Ctr	Controls	Ctr-1	batch2	Central	3	Central	231643	24.4141	24.4141
120	010	Ctr	Controls	Ctr-1	batch2	Central	3	Central	312391	13.7311	13.7311
121	011	Ctr	Controls	Ctr-1	batch2	Central	1	Central	226678	5.89101	5.89101
122	012	Ctr	Controls	Ctr-1	batch2	Central	3	Central	267615	8.94221	8.94221
123	013	Ctr	Controls	Ctr-1	batch2	Central	1	Central	261939	9.56473	9.56473
124	014	Ctr	Controls	Ctr-1	batch2	Central	1	Central	285315	1.61532	1.61532
125	015	Ctr	Controls	Ctr-1	batch2	Central	1	Central	186801	5.54086	5.54086
126	016	Ctr	Controls	Ctr-1	batch2	Central	3	Central	383394	13.8951	13.8951
127	017	Ctr	Controls	Ctr-1	batch2	Central	3	Central	503987	25.5791	25.5791
128	018	Ctr	Controls	Ctr-1	batch2	Central	3	Central	204532	12.0254	12.0254
129	019	Ctr	Controls	Ctr-1	batch2	Central	2	Central	250691	-1.27979	-1.27979
130	020	Ctr	Controls	Ctr-1	batch2	Central	2	Central	79527.7	-3.33267	-3.33267
131	021	Ctr	Controls	Ctr-1	batch2	Central	3	Central	325997	15.4199	15.4199
132	022	Ctr	Controls	Ctr-1	batch2	Central	1	Central	323562	5.19622	5.19622
133	023	Ctr	Controls	Ctr-1	batch2	Central	3	Central	208126	16.9503	16.9503
134	024	Ctr	Controls	Ctr-1	batch2	Central	3	Central	275100	13.2892	13.2892
135	025	Ctr	Controls	Ctr-1	batch2	Central	2	Central	251486	-8.20015	-8.20015
136	026	Ctr	Controls	Ctr-1	batch2	Central	3	Central	236200	13.9428	13.9428
137	027	Ctr	Controls	Ctr-1	batch2	Central	1	Central	174527	8.14289	8.14289
138	028	Ctr	Controls	Ctr-1	batch2	Central	3	Central	285081	14.1566	14.1566
139	029	Ctr	Controls	Ctr-1	batch2	Central	3	Central	240441	16.2401	16.2401
140	030	Ctr	Controls	Ctr-1	batch2	Central	3	Central	172692	9.68755	9.68755
141	031	Ctr	Controls	Ctr-1	batch2	Central	2	Central	71794.7	-12.4191	-12.4191
142	032	Ctr	Controls	Ctr-1	batch2	Central	3	Central	135262	15.2147	15.2147
143	033	Ctr	Controls	Ctr-1	batch2	Central	1	Central	320334	-0.197207	-0.197207
144	034	Ctr	Controls	Ctr-1	batch2	Central	2	Central	182041	-1.82236	-1.82236
145	035	Ctr	Controls	Ctr-1	batch2	Central	2	Central	168485	-3.11185	-3.11185
146	036	Ctr	Controls	Ctr-1	batch2	Central	3	Central	137997	7.88535	7.88535
147	037	Ctr	Controls	Ctr-1	batch2	Central	2	Central	136305	-9.46632	-9.46632
148	038	Ctr	Controls	Ctr-1	batch2	Central	2	Central	181063	-5.46207	-5.46207
149	039	Ctr	Controls	Ctr-1	batch2	Central	2	Central	190414	-23.2361	-23.2361
150	040	Ctr	Controls	Ctr-1	batch2	Central	2	Central	219465	-1.90688	-1.90688
151	041	Ctr	Controls	Ctr-1	batch2	Central	2	Central	359186	3.21671	3.21671
152	042	Ctr	Controls	Ctr-1	batch2	Distal	2	Central	266872	7.28587	7.28587
153	043	Ctr	Controls	Ctr-1	batch2	Distal	0	Proximal-distal	204333	-17.6514	-17.6514
154	044	Ctr	Controls	Ctr-1	batch2	Distal	2	Central	118637	1.56727	1.56727
155	045	Ctr	Controls	Ctr-1	batch2	Distal	0	Proximal-distal	127973	-15.4314	-15.4314
156	046	Ctr	Controls	Ctr-1	batch2	Distal	0	Proximal-distal	111821	-15.4461	-15.4461
157	047	Ctr	Controls	Ctr-1	batch2	Distal	2	Central	84029.8	-33.5854	-33.5854
158	048	Ctr	Controls	Ctr-1	batch2	Distal	0	Proximal-distal	338773	2.33301	2.33301
159	049	Ctr	Controls	Ctr-1	batch2	Distal	2	Central	58153.6	-53.1214	-53.1214
160	050	Ctr	Controls	Ctr-1	batch2	Distal	0	Proximal-distal	103243	-2.82881	-2.82881
161	051	Ctr	Controls	Ctr-1	batch2	Distal	3	Central	194595	30.255	30.255
162	052	Ctr	Controls	Ctr-1	batch2	Distal	0	Proximal-distal	104171	-9.19752	-9.19752
163	053	Ctr	Controls	Ctr-1	batch2	Distal	0	Proximal-distal	80762.7	-30.8686	-30.8686
164	054	Ctr	Controls	Ctr-1	batch2	Distal	0	Proximal-distal	203143	-6.56455	-6.56455
165	055	Ctr	Controls	Ctr-1	batch2	Distal	0	Proximal-distal	286350	-17.1088	-17.1088
166	056	Ctr	Controls	Ctr-1	batch2	Distal	0	Proximal-distal	419547	-12.1599	-12.1599
167	057	Ctr	Controls	Ctr-1	batch2	Distal	0	Proximal-distal	328851	-18.6023	-18.6023
168	058	Ctr	Controls	Ctr-1	batch2	Distal	0	Proximal-distal	170623	-17.7096	-17.7096
169	059	Ctr	Controls	Ctr-1	batch2	Distal	0	Proximal-distal	211995	-4.96462	-4.96462
170	060	Ctr	Controls	Ctr-1	batch2	Distal	0	Proximal-distal	444692	1.28468	1.28468
171	061	Ctr	Controls	Ctr-1	batch2	Distal	0	Proximal-distal	73441.6	-42.1461	-42.1461
172	001	Ctr	Controls	Ctr-2	batch2	Proximal	1	Central	55531.9	5.14259	5.14259
173	002	Ctr	Controls	Ctr-2	batch2	Proximal	1	Central	29374.7	2.60691	2.60691
174	003	Ctr	Controls	Ctr-2	batch2	Central	1	Central	49465.5	2.99911	2.99911
175	004	Ctr	Controls	Ctr-2	batch2	Central	1	Central	175384	9.49442	9.49442
176	005	Ctr	Controls	Ctr-2	batch2	Central	1	Central	63864	-18.4251	-18.4251
177	006	Ctr	Controls	Ctr-2	batch2	Central	2	Central	44908.3	-23.4997	-23.4997
178	007	Ctr	Controls	Ctr-2	batch2	Central	3	Central	145064	14.4683	14.4683
179	008	Ctr	Controls	Ctr-2	batch2	Central	1	Central	149221	6.85768	6.85768
180	009	Ctr	Controls	Ctr-2	batch2	Central	3	Central	356208	20.5162	20.5162
181	010	Ctr	Controls	Ctr-2	batch2	Central	1	Central	87373.6	6.89432	6.89432
182	011	Ctr	Controls	Ctr-2	batch2	Central	3	Central	217381	15.2913	15.2913
183	012	Ctr	Controls	Ctr-2	batch2	Central	1	Central	151251	1.76045	1.76045
184	013	Ctr	Controls	Ctr-2	batch2	Central	3	Central	208388	18.7353	18.7353
185	014	Ctr	Controls	Ctr-2	batch2	Central	2	Central	95214.9	-8.17824	-8.17824
186	015	Ctr	Controls	Ctr-2	batch2	Central	3	Central	264240	13.7259	13.7259
187	016	Ctr	Controls	Ctr-2	batch2	Central	1	Central	133152	1.41631	1.41631
188	017	Ctr	Controls	Ctr-2	batch2	Central	1	Central	176111	7.45408	7.45408
189	018	Ctr	Controls	Ctr-2	batch2	Central	1	Central	233225	9.04491	9.04491
190	019	Ctr	Controls	Ctr-2	batch2	Central	3	Central	145387	20.9969	20.9969
191	020	Ctr	Controls	Ctr-2	batch2	Central	1	Central	166274	7.45309	7.45309
192	021	Ctr	Controls	Ctr-2	batch2	Central	1	Central	78735.7	8.28839	8.28839
193	022	Ctr	Controls	Ctr-2	batch2	Central	1	Central	144454	3.65775	3.65775
194	023	Ctr	Controls	Ctr-2	batch2	Central	1	Central	311131	3.3605	3.3605
195	024	Ctr	Controls	Ctr-2	batch2	Central	2	Central	209737	-10.1142	-10.1142
196	025	Ctr	Controls	Ctr-2	batch2	Central	1	Central	188286	6.39357	6.39357
197	026	Ctr	Controls	Ctr-2	batch2	Central	2	Central	197240	-4.69772	-4.69772
198	027	Ctr	Controls	Ctr-2	batch2	Central	2	Central	216739	3.6212	3.6212
199	028	Ctr	Controls	Ctr-2	batch2	Central	2	Central	181742	4.80269	4.80269
200	029	Ctr	Controls	Ctr-2	batch2	Central	1	Central	119951	2.52479	2.52479
201	030	Ctr	Controls	Ctr-2	batch2	Central	2	Central	179927	-5.59508	-5.59508
202	031	Ctr	Controls	Ctr-2	batch2	Central	2	Central	198476	1.71591	1.71591
203	032	Ctr	Controls	Ctr-2	batch2	Central	3	Central	292286	19.3551	19.3551
204	033	Ctr	Controls	Ctr-2	batch2	Central	2	Central	156904	1.81794	1.81794
205	034	Ctr	Controls	Ctr-2	batch2	Central	2	Central	300910	-1.93566	-1.93566
206	035	Ctr	Controls	Ctr-2	batch2	Central	2	Central	157200	3.77297	3.77297
207	036	Ctr	Controls	Ctr-2	batch2	Central	2	Central	88667.9	-0.530441	-0.530441
208	037	Ctr	Controls	Ctr-2	batch2	Central	2	Central	120555	-8.25529	-8.25529
209	038	Ctr	Controls	Ctr-2	batch2	Central	2	Central	346184	-1.7774	-1.7774
210	039	Ctr	Controls	Ctr-2	batch2	Central	2	Central	272133	-13.9525	-13.9525
211	040	Ctr	Controls	Ctr-2	batch2	Central	2	Central	332782	-9.40795	-9.40795
212	041	Ctr	Controls	Ctr-2	batch2	Central	2	Central	320786	-4.95061	-4.95061
213	042	Ctr	Controls	Ctr-2	batch2	Central	2	Central	210160	-7.4419	-7.4419
214	043	Ctr	Controls	Ctr-2	batch2	Central	2	Central	110758	-15.1495	-15.1495
215	044	Ctr	Controls	Ctr-2	batch2	Central	0	Proximal-distal	116261	-14.5606	-14.5606
216	045	Ctr	Controls	Ctr-2	batch2	Distal	0	Proximal-distal	165949	-0.921706	-0.921706
217	046	Ctr	Controls	Ctr-2	batch2	Distal	0	Proximal-distal	373189	-6.12105	-6.12105
218	047	Ctr	Controls	Ctr-2	batch2	Distal	0	Proximal-distal	268981	-3.97081	-3.97081
219	048	Ctr	Controls	Ctr-2	batch2	Distal	0	Proximal-distal	61684.3	4.76917	4.76917
220	049	Ctr	Controls	Ctr-2	batch2	Distal	0	Proximal-distal	260468	-5.99443	-5.99443
221	050	Ctr	Controls	Ctr-2	batch2	Distal	0	Proximal-distal	265357	3.64634	3.64634
222	051	Ctr	Controls	Ctr-2	batch2	Distal	0	Proximal-distal	111717	-10.2006	-10.2006
223	052	Ctr	Controls	Ctr-2	batch2	Distal	0	Proximal-distal	223228	-10.0575	-10.0575
224	053	Ctr	Controls	Ctr-2	batch2	Distal	0	Proximal-distal	164543	-17.3822	-17.3822
225	054	Ctr	Controls	Ctr-2	batch2	Distal	0	Proximal-distal	333682	-11.1195	-11.1195
226	055	Ctr	Controls	Ctr-2	batch2	Distal	0	Proximal-distal	454807	-7.0846	-7.0846
227	056	Ctr	Controls	Ctr-2	batch2	Distal	0	Proximal-distal	49601.8	-11.2598	-11.2598

## Sheet: Pearson correlation coefficient
	001_Muscle_1	002_Muscle_1	003_Muscle_1	004_Muscle_1	005_Muscle_1	006_Muscle_1	007_Muscle_1	008_Muscle_1	009_Muscle_1	010_Muscle_1	011_Muscle_1	012_Muscle_1	013_Muscle_1	014_Muscle_1	015_Muscle_1	016_Muscle_1	017_Muscle_1	018_Muscle_1	019_Muscle_1	020_Muscle_1	021_Muscle_1	022_Muscle_1	023_Muscle_1	024_Muscle_1	025_Muscle_1	026_Muscle_1	027_Muscle_1	028_Muscle_1	029_Muscle_1	030_Muscle_1	031_Muscle_1	032_Muscle_1	033_Muscle_1	034_Muscle_1	035_Muscle_1	036_Muscle_1	037_Muscle_1	001_Muscle_2	002_Muscle_2	003_Muscle_2	004_Muscle_2	005_Muscle_2	006_Muscle_2	007_Muscle_2	008_Muscle_2	009_Muscle_2	010_Muscle_2	011_Muscle_2	012_Muscle_2
001_Muscle_1	1	0.00766983	0.0129075	-0.00184742	-0.0555671	-0.018624	-0.0719204	-0.0414798	-0.059568	-0.0524095	-0.0271525	-0.00123234	-0.0577358	-0.0597294	-0.0461483	-0.0428509	-0.122467	0.0226354	-0.0156553	-0.0151511	-0.0397946	-0.104684	-0.02846	-0.0922721	-0.0212787	-0.0614731	-0.0715035	-0.0794657	-0.0816439	-0.0563411	-0.0387543	-0.0767861	-0.011508	-0.0398272	0.0159703	-0.0181926	-0.043084	0.0139895	0.0174072	0.0309784	0.0341053	-0.0352631	0.0264672	-0.0244522	-0.0190836	-0.00660078	-0.0300101	-0.0233012	-0.0111254
002_Muscle_1	0.00766983	1	-0.0251318	0.0677889	0.0325039	-0.017803	-0.0140641	-0.0459047	-0.0352272	-0.0674089	-0.048033	-0.0464987	-0.0622723	0.0234081	0.00951142	-0.108946	-0.0428157	-0.0887167	-0.0899801	-0.0715514	-0.100914	-0.0258306	-0.0732874	-0.0523169	-0.0508346	-0.0477679	-0.0131434	-0.0569417	-0.0605866	0.00364673	-0.0494537	-0.0594922	-0.0256498	0.032437	-0.0245705	-0.0284824	-0.0198919	0.0437712	0.058421	0.0281221	0.0265623	0.0694072	0.0112122	-0.0104746	0.00377862	-0.014895	-0.0255295	-0.0511737	-0.0789642
003_Muscle_1	0.0129075	-0.0251318	1	0.0104989	-0.0485387	-0.0614395	-0.0783811	-0.0379396	-0.0452275	-0.0698692	-0.0905767	-0.0322336	-0.0657919	-0.0932003	-0.0703331	0.0145274	-0.0718768	0.0109127	0.00202885	-0.037345	-0.0216377	-0.0227024	-0.0171704	-0.0960197	-0.0287735	-0.00522677	-0.0446144	-0.0384268	-0.0555996	-0.0719996	0.00935058	-0.0177986	0.0470514	-0.0204584	0.0812396	-0.0159598	-0.0801116	-0.0276279	0.00272229	-0.0206593	0.03951	-0.0843763	-0.0166438	-0.0266942	-0.0111082	-0.0151546	0.0283329	-0.0182691	0.0228427
004_Muscle_1	-0.00184742	0.0677889	0.0104989	1	0.0425536	0.0678508	0.00676202	-0.0554947	-0.00698582	-0.058894	-0.0521462	-0.0552711	-0.00515223	0.124513	0.0302459	-0.0800467	0.00256088	-0.113609	-0.101857	-0.0800458	-0.159847	0.0637835	-0.11097	-0.0434872	-0.00763888	0.0338336	0.00276752	-0.138165	-0.0941088	0.0273372	-0.0370606	-0.0573547	-0.0422582	0.0628381	-0.0521561	-0.00618821	-0.02481	-0.00394676	0.0777123	0.0927097	0.0449419	0.103509	0.0239085	-0.0420034	0.0781786	0.0151409	0.0573845	0.00600181	-0.0504756
005_Muscle_1	-0.0555671	0.0325039	-0.0485387	0.0425536	1	0.0727199	0.00864202	-0.00157812	0.0280488	0.0448231	0.0066632	-0.0269933	0.0103113	0.0321646	-0.00961942	-0.0676922	0.00906325	-0.0510835	-0.102119	-0.0732516	-0.0955323	0.0191143	-0.0169448	0.0105382	-0.0424264	-0.0158369	-0.0338544	-0.06847	-0.0513674	0.00316924	-0.0249872	-0.086755	-0.108804	-0.0312548	-0.114045	-0.0488732	-0.0344097	0.0228499	0.0433001	0.0355644	-0.000894449	0.101413	0.0494962	0.0368035	0.0472162	0.0393038	0.015275	0.0447389	-0.0343304
006_Muscle_1	-0.018624	-0.017803	-0.0614395	0.0678508	0.0727199	1	0.0696131	0.00505619	0.0706194	0.0502952	0.00830183	0.00407476	0.0743029	0.139136	0.039541	-0.0654434	0.0578697	-0.0631737	-0.153902	-0.12082	-0.0662287	0.0435379	-0.0760251	-0.0245395	-0.0584797	0.0340471	-0.0283794	-0.0707121	-0.0085295	0.0326188	-0.0661389	-0.0683683	-0.109589	-0.0427795	-0.142912	-0.0862942	-0.0402545	0.0192816	0.0755837	0.0877368	0.00863693	0.132111	0.0473598	-0.0352974	0.0555711	0.0505353	0.0565139	0.0697208	-0.00473044
007_Muscle_1	-0.0719204	-0.0140641	-0.0783811	0.00676202	0.00864202	0.0696131	1	0.0957766	-0.0323753	0.0379542	-0.0160935	-0.0067542	-0.00317195	0.0737509	0.0465355	-0.012884	-0.0179539	-0.0837111	-0.0605041	-0.0334465	-0.0304417	-0.0328332	-0.0684193	0.0197819	-0.0227357	-0.00462733	-0.0101098	-0.075169	0.0682939	-0.0177812	-0.0836874	0.0343167	-0.101631	-0.0571616	-0.105581	-0.0534388	-0.0593459	-0.00780115	0.0318147	0.0249533	0.0272625	0.102999	0.0425155	0.0343633	0.0434516	-0.0169458	0.0159753	0.0322861	0.0245319
008_Muscle_1	-0.0414798	-0.0459047	-0.0379396	-0.0554947	-0.00157812	0.00505619	0.0957766	1	-0.0399545	0.037182	0.00150073	-0.0039818	0.0171854	-0.0289331	-0.00470592	0.000253146	-0.0354548	-0.0774181	-0.0346401	-0.0066232	-0.0283522	-0.0488758	-0.0312251	-0.00565606	-0.0308993	-0.0193077	0.0147775	-0.0613105	0.0602434	-0.0531752	-0.065901	0.0199035	-0.0317499	-0.0707083	-0.0601867	-0.056208	-0.0604349	0.0562005	0.0113786	0.0319572	0.0353473	-0.0204012	0.0130586	0.0135902	0.023101	-0.00792402	0.00556864	0.0264685	0.00704979
009_Muscle_1	-0.059568	-0.0352272	-0.0452275	-0.00698582	0.0280488	0.0706194	-0.0323753	-0.0399545	1	0.0521742	0.0148761	0.00953774	0.0648266	0.0467577	0.0229436	0.0338622	0.102406	0.0447158	-0.085731	-0.104942	0.00360937	-0.00702778	-0.026615	-0.00721263	-0.0302339	0.00470635	-0.0650668	-0.0164216	-0.0569776	-0.0332118	-0.0745354	-0.11956	-0.0895813	-0.0674106	-0.128152	-0.0630142	-0.0530877	-0.00502338	0.0102982	0.0138643	0.0122872	0.06574	0.0438936	0.0261344	0.0028079	0.0655672	0.0548998	0.0485855	0.0441033
010_Muscle_1	-0.0524095	-0.0674089	-0.0698692	-0.058894	0.0448231	0.0502952	0.0379542	0.037182	0.0521742	1	0.0477599	0.00183594	0.048554	-0.0119012	0.0270527	0.0132169	0.0271063	0.0416073	-0.0468136	-0.0852274	0.0275258	-0.0317099	-0.00724493	-0.00265565	-0.0401707	-0.0873179	0.0104378	-0.04941	0.0103578	-0.0116704	-0.0391897	-0.112102	-0.130547	-0.098735	-0.141078	-0.117577	-0.0665763	0.0460619	0.00839921	0.00819124	-0.0526871	0.0267187	0.0492532	0.0983878	0.0493824	0.0567739	0.00455325	0.0183353	0.019865
011_Muscle_1	-0.0271525	-0.048033	-0.0905767	-0.0521462	0.0066632	0.00830183	-0.0160935	0.00150073	0.0148761	0.0477599	1	-0.0127335	0.0551435	0.0559029	-0.00784968	-0.0271302	0.000694192	-0.014108	-0.0335084	-0.0562964	-0.00606265	-0.0308931	-0.0115023	-0.0375803	-0.0461371	-0.0716295	-0.0404634	-0.025391	-0.038893	-0.0293694	-0.0213055	-0.0896031	-0.116791	-0.0817173	-0.0876661	-0.0628525	-0.0610338	0.017426	0.0100413	0.0114264	-0.0231666	0.0434397	0.0800181	0.0877419	0.0181338	0.0456124	-0.00167775	0.017101	0.0363618
012_Muscle_1	-0.00123234	-0.0464987	-0.0322336	-0.0552711	-0.0269933	0.00407476	-0.0067542	-0.0039818	0.00953774	0.00183594	-0.0127335	1	-0.0419417	-0.0317761	-0.0149088	0.00109725	-0.0141489	0.0240121	0.0257633	-0.0357942	0.00513215	-0.034936	0.0320026	-0.05821	-0.0120237	-0.0407966	-0.040915	-0.021485	-0.0237657	-0.0664385	-0.0500561	-0.0969354	-0.0301594	-0.0540294	-0.0613791	-0.061535	-0.0484654	0.0119284	0.018625	0.0165661	0.0381743	-0.000853735	0.00746882	0.0156712	0.00366079	0.0191763	0.0409509	0.0424316	0.0370788
013_Muscle_1	-0.0577358	-0.0622723	-0.0657919	-0.00515223	0.0103113	0.0743029	-0.00317195	0.0171854	0.0648266	0.048554	0.0551435	-0.0419417	1	0.0476576	0.0331264	0.00267684	0.107652	-0.021478	-0.0501915	-0.0608841	-0.0312556	0.00436489	-0.0212989	0.00386849	-0.0692565	-0.0356635	-0.0250136	-0.0452118	-0.0277245	-0.0409494	-0.0640544	-0.0429555	-0.111816	-0.0475778	-0.132526	-0.051451	-0.0798119	0.0132889	0.00834817	0.049601	0.0228041	0.0784279	0.0438836	0.0373801	0.0240318	0.0630657	0.0446719	0.0522949	0.00392387
014_Muscle_1	-0.0597294	0.0234081	-0.0932003	0.124513	0.0321646	0.139136	0.0737509	-0.0289331	0.0467577	-0.0119012	0.0559029	-0.0317761	0.0476576	1	0.0761414	-0.133706	0.0406717	-0.0907172	-0.148915	-0.0828536	-0.131687	0.0723945	-0.0604481	-0.0292322	-0.039611	0.032324	-0.0232826	-0.111397	-0.108939	0.0576978	-0.0846978	-0.116564	-0.0950271	0.0368375	-0.111942	-0.055269	-0.0220213	0.0406172	0.111824	0.114349	-0.00582603	0.226156	0.110942	-0.01794	0.0505962	0.016785	0.0529798	-0.00192867	-0.0671047
015_Muscle_1	-0.0461483	0.00951142	-0.0703331	0.0302459	-0.00961942	0.039541	0.0465355	-0.00470592	0.0229436	0.0270527	-0.00784968	-0.0149088	0.0331264	0.0761414	1	-0.018564	0.0449724	-0.0797682	-0.0821388	-0.062616	-0.0761523	0.0137992	-0.0200924	0.0204878	-0.0501549	-0.0335061	-0.0240971	-0.0568915	-0.0117192	-0.00540913	-0.056965	-0.0532823	-0.0769238	-0.0262687	-0.103772	-0.040175	-0.0667489	0.0279716	0.0490067	0.0696872	0.0111958	0.12085	0.0425761	0.0417971	0.067514	0.0424922	0.0460053	0.0148993	-0.0202504
016_Muscle_1	-0.0428509	-0.108946	0.0145274	-0.0800467	-0.0676922	-0.0654434	-0.012884	0.000253146	0.0338622	0.0132169	-0.0271302	0.00109725	0.00267684	-0.133706	-0.018564	1	0.0832209	0.138301	0.0360448	-0.0162092	0.0699708	-0.0503074	0.00495077	-0.0225109	-0.0304837	0.0732646	-0.0586144	0.0111523	0.103312	-0.134161	-0.091236	0.0283264	0.0270302	-0.10347	-0.0172818	-0.0236228	-0.101542	-0.0405089	-0.0666202	-0.0495743	0.0217557	-0.171972	-0.0212087	0.0437893	-0.029168	0.0835322	0.109896	0.0432259	0.04697
017_Muscle_1	-0.122467	-0.0428157	-0.0718768	0.00256088	0.00906325	0.0578697	-0.0179539	-0.0354548	0.102406	0.0271063	0.000694192	-0.0141489	0.107652	0.0406717	0.0449724	0.0832209	1	0.0127468	-0.101675	-0.0971137	-0.0138217	0.0560749	-0.0287008	0.0255854	-0.0440937	-0.0257983	-0.031605	-0.0226916	-0.00692902	0.0182469	-0.0498543	-0.0777299	-0.0989649	-0.0246322	-0.153374	-0.0499406	-0.0176837	-0.00238697	0.00811214	0.0239892	-0.0364496	0.0762043	0.00229461	0.0438946	0.0302031	0.0902292	0.0719958	0.107523	-0.0100469
018_Muscle_1	0.0226354	-0.0887167	0.0109127	-0.113609	-0.0510835	-0.0631737	-0.0837111	-0.0774181	0.0447158	0.0416073	-0.014108	0.0240121	-0.021478	-0.0907172	-0.0797682	0.138301	0.0127468	1	0.0452112	-0.0347505	0.124234	-0.0328072	0.0417504	-0.0450362	-0.0391686	-0.0604357	-0.119046	0.0107607	-0.0198873	-0.0965278	-0.0366716	-0.106417	0.00495463	-0.116829	-0.0392067	-0.0471982	-0.0653315	-0.0251529	-0.0540596	-0.0560585	-0.0131263	-0.0574484	0.00401281	0.062355	-0.0596384	0.053342	0.0230927	-0.000214978	0.097066
019_Muscle_1	-0.0156553	-0.0899801	0.00202885	-0.101857	-0.102119	-0.153902	-0.0605041	-0.0346401	-0.085731	-0.0468136	-0.0335084	0.0257633	-0.0501915	-0.148915	-0.0821388	0.0360448	-0.101675	0.0452112	1	0.0514167	0.0545988	-0.12314	0.036122	-0.0610871	-0.0398926	-0.0724389	-0.0391103	0.0150682	0.0217114	-0.151763	-0.010376	0.00174216	0.0167056	-0.106649	0.0576071	-0.0174699	-0.0733524	-0.0319594	-0.0453551	-0.065561	0.0205558	-0.11749	-0.0277783	8.17664e-05	0.00668926	-0.0354532	-0.0400338	-0.026034	0.0514174
020_Muscle_1	-0.0151511	-0.0715514	-0.037345	-0.0800458	-0.0732516	-0.12082	-0.0334465	-0.0066232	-0.104942	-0.0852274	-0.0562964	-0.0357942	-0.0608841	-0.0828536	-0.062616	-0.0162092	-0.0971137	-0.0347505	0.0514167	1	0.00729244	-0.058865	-0.0196222	-0.0474272	-0.039812	-0.0485365	-0.0391497	-0.0387607	-0.0146659	-0.099198	-0.0441358	0.0112772	-0.0417948	-0.0543968	0.0140142	-0.0486607	-0.0728243	-0.019884	-0.00623402	-0.0173166	0.0618887	-0.04505	-0.0273887	-0.00400932	0.0192717	-0.0868871	-0.0128805	-0.0240557	0.0191784
021_Muscle_1	-0.0397946	-0.100914	-0.0216377	-0.159847	-0.0955323	-0.0662287	-0.0304417	-0.0283522	0.00360937	0.0275258	-0.00606265	0.00513215	-0.0312556	-0.131687	-0.0761523	0.0699708	-0.0138217	0.124234	0.0545988	0.00729244	1	-0.0987822	0.0517734	-0.0266188	-0.0205575	-0.0789863	0.00561444	0.013536	0.029491	-0.0700188	-0.0233263	-0.00181312	-0.0176202	-0.118978	0.0107139	-0.00671169	-0.0842606	-0.022589	-0.0532605	-0.0409811	0.00444011	-0.0955154	0.0154548	0.0641972	-0.0541838	0.0103647	-0.0298647	0.0104056	0.0751645
022_Muscle_1	-0.104684	-0.0258306	-0.0227024	0.0637835	0.0191143	0.0435379	-0.0328332	-0.0488758	-0.00702778	-0.0317099	-0.0308931	-0.034936	0.00436489	0.0723945	0.0137992	-0.0503074	0.0560749	-0.0328072	-0.12314	-0.058865	-0.0987822	1	-0.0220328	-0.0107131	-0.0306401	0.0350407	-0.016826	-0.0133357	-0.0783934	0.0315516	-0.0186353	-0.0962483	-0.0355925	0.0248154	-0.0679988	-0.0250025	-0.041697	0.0204959	0.0213674	0.0467489	-0.0314735	0.079472	0.0177127	-0.0202487	0.0337269	0.0415762	0.030578	-0.00943328	-0.0429219
023_Muscle_1	-0.02846	-0.0732874	-0.0171704	-0.11097	-0.0169448	-0.0760251	-0.0684193	-0.0312251	-0.026615	-0.00724493	-0.0115023	0.0320026	-0.0212989	-0.0604481	-0.0200924	0.00495077	-0.0287008	0.0417504	0.036122	-0.0196222	0.0517734	-0.0220328	1	-0.0184606	-0.0688626	-0.0492673	-0.0306589	0.00769388	0.0261249	-0.0458092	-0.0678295	-0.0373384	0.00395889	-0.0548178	0.0273843	-0.066037	-0.0458682	0.00156568	-0.0261975	0.0153612	-0.0189445	-0.0260287	0.0368125	0.0167285	-0.0235334	0.0229868	-0.0166605	0.0170763	0.0479719
024_Muscle_1	-0.0922721	-0.0523169	-0.0960197	-0.0434872	0.0105382	-0.0245395	0.0197819	-0.00565606	-0.00721263	-0.00265565	-0.0375803	-0.05821	0.00386849	-0.0292322	0.0204878	-0.0225109	0.0255854	-0.0450362	-0.0610871	-0.0474272	-0.0266188	-0.0107131	-0.0184606	1	-0.0404945	-0.0533683	-0.0154488	0.00821985	0.0608306	0.00230382	-0.0337376	0.0365808	-0.0719299	-0.0453728	-0.0736461	-0.0374028	-0.0271905	0.02518	-0.0482012	-0.002026	-0.0335344	0.0506069	-0.0249366	0.0560722	0.00865261	0.0178103	0.0146351	-0.0145716	-0.0267513
025_Muscle_1	-0.0212787	-0.0508346	-0.0287735	-0.00763888	-0.0424264	-0.0584797	-0.0227357	-0.0308993	-0.0302339	-0.0401707	-0.0461371	-0.0120237	-0.0692565	-0.039611	-0.0501549	-0.0304837	-0.0440937	-0.0391686	-0.0398926	-0.039812	-0.0205575	-0.0306401	-0.0688626	-0.0404945	1	0.00762963	0.0162144	-0.0105742	-0.0131618	-0.0133846	-0.00175458	-0.00454359	0.00384528	-0.0188128	-0.0463956	-0.00719898	-0.0418137	-0.0111931	0.00344763	-0.00200553	-0.0024	0.0208663	-0.0362825	-0.00699889	0.0587769	0.0179531	-0.0364431	0.000801816	-0.0441824
026_Muscle_1	-0.0614731	-0.0477679	-0.00522677	0.0338336	-0.0158369	0.0340471	-0.00462733	-0.0193077	0.00470635	-0.0873179	-0.0716295	-0.0407966	-0.0356635	0.032324	-0.0335061	0.0732646	-0.0257983	-0.0604357	-0.0724389	-0.0485365	-0.0789863	0.0350407	-0.0492673	-0.0533683	0.00762963	1	0.0444683	0.000338855	0.0236316	-0.0146515	-0.0642448	0.0429526	0.0553464	0.00742942	0.00801239	-0.0244578	-0.0424517	-0.0209332	-0.0179805	-0.0377094	-0.00966971	-0.0446406	-0.0112044	-0.080293	-0.0266309	-0.0364773	0.0263178	0.00518529	-0.0145704
027_Muscle_1	-0.0715035	-0.0131434	-0.0446144	0.00276752	-0.0338544	-0.0283794	-0.0101098	0.0147775	-0.0650668	0.0104378	-0.0404634	-0.040915	-0.0250136	-0.0232826	-0.0240971	-0.0586144	-0.031605	-0.119046	-0.0391103	-0.0391497	0.00561444	-0.016826	-0.0306589	-0.0154488	0.0162144	0.0444683	1	0.0216914	0.0647138	0.00325031	0.0166171	0.0508395	0.011957	0.0216595	-0.00543651	-0.0336859	-0.0456836	-0.0119514	-0.0142248	-0.0365323	-0.0242087	-0.0284449	-0.0273418	-0.0403515	0.0061534	-0.0294059	-0.0477987	-0.00828455	-0.0647171
028_Muscle_1	-0.0794657	-0.0569417	-0.0384268	-0.138165	-0.06847	-0.0707121	-0.075169	-0.0613105	-0.0164216	-0.04941	-0.025391	-0.021485	-0.0452118	-0.111397	-0.0568915	0.0111523	-0.0226916	0.0107607	0.0150682	-0.0387607	0.013536	-0.0133357	0.00769388	0.00821985	-0.0105742	0.000338855	0.0216914	1	0.00129776	-0.0305225	-0.017474	0.0564832	0.0315636	-0.0260685	0.0131275	-0.0314333	0.0123531	-0.0447325	-0.0399515	-0.0880823	-0.0145891	-0.0959516	-0.0481722	-0.0472584	-0.0395576	-0.00952041	-0.0433853	-0.0214744	0.037151
029_Muscle_1	-0.0816439	-0.0605866	-0.0555996	-0.0941088	-0.0513674	-0.0085295	0.0682939	0.0602434	-0.0569776	0.0103578	-0.038893	-0.0237657	-0.0277245	-0.108939	-0.0117192	0.103312	-0.00692902	-0.0198873	0.0217114	-0.0146659	0.029491	-0.0783934	0.0261249	0.0608306	-0.0131618	0.0236316	0.0647138	0.00129776	1	-0.045453	-0.0716735	0.157354	-0.00996191	-0.106425	0.014067	-0.0764655	-0.0420639	0.0293654	-0.0652457	-0.0545411	-0.00813715	-0.0766406	-0.0447236	0.0581146	0.0262845	0.000375776	-0.0611693	0.00971761	0.0123796
030_Muscle_1	-0.0563411	0.00364673	-0.0719996	0.0273372	0.00316924	0.0326188	-0.0177812	-0.0531752	-0.0332118	-0.0116704	-0.0293694	-0.0664385	-0.0409494	0.0576978	-0.00540913	-0.134161	0.0182469	-0.0965278	-0.151763	-0.099198	-0.0700188	0.0315516	-0.0458092	0.00230382	-0.0133846	-0.0146515	0.00325031	-0.0305225	-0.045453	1	-0.029798	-0.0217477	-0.0163322	0.056991	-0.0584267	-0.0306354	0.0298694	0.046364	0.00427643	0.0136965	-0.0605125	0.0641041	-0.0185356	-0.0128672	-0.00713327	-0.0201835	-0.00644141	-0.0327478	-0.0539115
031_Muscle_1	-0.0387543	-0.0494537	0.00935058	-0.0370606	-0.0249872	-0.0661389	-0.0836874	-0.065901	-0.0745354	-0.0391897	-0.0213055	-0.0500561	-0.0640544	-0.0846978	-0.056965	-0.091236	-0.0498543	-0.0366716	-0.010376	-0.0441358	-0.0233263	-0.0186353	-0.0678295	-0.0337376	-0.00175458	-0.0642448	0.0166171	-0.017474	-0.0716735	-0.029798	1	-0.0231947	-0.0108385	0.00859453	0.00641848	-0.0147319	-0.0270453	-0.014933	-0.00183085	0.0062817	-0.0307657	-0.0622523	-0.0299604	0.0135416	-0.0111896	-0.0164876	-0.0598955	0.00716993	-0.00707599
032_Muscle_1	-0.0767861	-0.0594922	-0.0177986	-0.0573547	-0.086755	-0.0683683	0.0343167	0.0199035	-0.11956	-0.112102	-0.0896031	-0.0969354	-0.0429555	-0.116564	-0.0532823	0.0283264	-0.0777299	-0.106417	0.00174216	0.0112772	-0.00181312	-0.0962483	-0.0373384	0.0365808	-0.00454359	0.0429526	0.0508395	0.0564832	0.157354	-0.0217477	-0.0231947	1	0.0437856	-0.00353966	0.0941244	0.0112589	0.00682073	-0.0391586	-0.0684869	-0.0628566	-0.0455133	-0.127088	-0.0699709	-0.070122	-0.0466362	-0.107703	-0.0411199	-0.0433681	-0.0171298
033_Muscle_1	-0.011508	-0.0256498	0.0470514	-0.0422582	-0.108804	-0.109589	-0.101631	-0.0317499	-0.0895813	-0.130547	-0.116791	-0.0301594	-0.111816	-0.0950271	-0.0769238	0.0270302	-0.0989649	0.00495463	0.0167056	-0.0417948	-0.0176202	-0.0355925	0.00395889	-0.0719299	0.00384528	0.0553464	0.011957	0.0315636	-0.00996191	-0.0163322	-0.0108385	0.0437856	1	0.0529509	0.165698	0.00953621	0.021423	-0.00196114	-0.032403	-0.0886521	0.0137795	-0.0924847	-0.0736967	-0.0796814	-0.0577017	-0.062504	-0.0299921	-0.0485543	0.0151285
034_Muscle_1	-0.0398272	0.032437	-0.0204584	0.0628381	-0.0312548	-0.0427795	-0.0571616	-0.0707083	-0.0674106	-0.098735	-0.0817173	-0.0540294	-0.0475778	0.0368375	-0.0262687	-0.10347	-0.0246322	-0.116829	-0.106649	-0.0543968	-0.118978	0.0248154	-0.0548178	-0.0453728	-0.0188128	0.00742942	0.0216595	-0.0260685	-0.106425	0.056991	0.00859453	-0.00353966	0.0529509	1	0.0638384	-0.030474	0.0322237	-0.00863399	-0.0121298	-0.00351957	-0.0492708	0.0207412	-0.0630814	-0.112159	-0.0451897	-0.0455104	-0.0117191	-0.0493688	-0.0580928
035_Muscle_1	0.0159703	-0.0245705	0.0812396	-0.0521561	-0.114045	-0.142912	-0.105581	-0.0601867	-0.128152	-0.141078	-0.0876661	-0.0613791	-0.132526	-0.111942	-0.103772	-0.0172818	-0.153374	-0.0392067	0.0576071	0.0140142	0.0107139	-0.0679988	0.0273843	-0.0736461	-0.0463956	0.00801239	-0.00543651	0.0131275	0.014067	-0.0584267	0.00641848	0.0941244	0.165698	0.0638384	1	0.0076699	0.0131578	-0.0238212	-0.0530564	-0.0702986	0.027437	-0.118028	-0.0669655	-0.0813186	-0.0718597	-0.124629	-0.0595064	-0.0875799	-0.0156523
036_Muscle_1	-0.0181926	-0.0284824	-0.0159598	-0.00618821	-0.0488732	-0.0862942	-0.0534388	-0.056208	-0.0630142	-0.117577	-0.0628525	-0.061535	-0.051451	-0.055269	-0.040175	-0.0236228	-0.0499406	-0.0471982	-0.0174699	-0.0486607	-0.00671169	-0.0250025	-0.066037	-0.0374028	-0.00719898	-0.0244578	-0.0336859	-0.0314333	-0.0764655	-0.0306354	-0.0147319	0.0112589	0.00953621	-0.030474	0.0076699	1	-0.0133492	-0.0318179	0.00454122	-0.0277217	0.00587277	-0.0305753	-0.0229557	-0.0141717	-0.0513622	0.00567884	0.00324951	0.000676778	0.0260098
037_Muscle_1	-0.043084	-0.0198919	-0.0801116	-0.02481	-0.0344097	-0.0402545	-0.0593459	-0.0604349	-0.0530877	-0.0665763	-0.0610338	-0.0484654	-0.0798119	-0.0220213	-0.0667489	-0.101542	-0.0176837	-0.0653315	-0.0733524	-0.0728243	-0.0842606	-0.041697	-0.0458682	-0.0271905	-0.0418137	-0.0424517	-0.0456836	0.0123531	-0.0420639	0.0298694	-0.0270453	0.00682073	0.021423	0.0322237	0.0131578	-0.0133492	1	-0.0176946	0.00166636	0.00629275	-0.0383478	0.0119021	-0.0152912	-0.0140433	-0.0491908	-0.0115656	-0.0363923	-0.0033129	-0.0150091
001_Muscle_2	0.0139895	0.0437712	-0.0276279	-0.00394676	0.0228499	0.0192816	-0.00780115	0.0562005	-0.00502338	0.0460619	0.017426	0.0119284	0.0132889	0.0406172	0.0279716	-0.0405089	-0.00238697	-0.0251529	-0.0319594	-0.019884	-0.022589	0.0204959	0.00156568	0.02518	-0.0111931	-0.0209332	-0.0119514	-0.0447325	0.0293654	0.046364	-0.014933	-0.0391586	-0.00196114	-0.00863399	-0.0238212	-0.0318179	-0.0176946	1	0.00273582	0.0570669	-0.0208575	0.0741494	-0.0314324	-0.00331858	-0.014814	-0.0147176	-0.0283905	-0.0447614	-0.0484603
002_Muscle_2	0.0174072	0.058421	0.00272229	0.0777123	0.0433001	0.0755837	0.0318147	0.0113786	0.0102982	0.00839921	0.0100413	0.018625	0.00834817	0.111824	0.0490067	-0.0666202	0.00811214	-0.0540596	-0.0453551	-0.00623402	-0.0532605	0.0213674	-0.0261975	-0.0482012	0.00344763	-0.0179805	-0.0142248	-0.0399515	-0.0652457	0.00427643	-0.00183085	-0.0684869	-0.032403	-0.0121298	-0.0530564	0.00454122	0.00166636	0.00273582	1	0.105337	0.0721489	0.117113	0.0503853	-0.0311831	0.00123154	0.00576063	0.0340005	-0.00122602	-0.0575069
003_Muscle_2	0.0309784	0.0281221	-0.0206593	0.0927097	0.0355644	0.0877368	0.0249533	0.0319572	0.0138643	0.00819124	0.0114264	0.0165661	0.049601	0.114349	0.0696872	-0.0495743	0.0239892	-0.0560585	-0.065561	-0.0173166	-0.0409811	0.0467489	0.0153612	-0.002026	-0.00200553	-0.0377094	-0.0365323	-0.0880823	-0.0545411	0.0136965	0.0062817	-0.0628566	-0.0886521	-0.00351957	-0.0702986	-0.0277217	0.00629275	0.0570669	0.105337	1	0.0630244	0.140366	0.043127	0.005621	0.0298951	0.0219838	0.0320399	0.025798	-0.0431663
004_Muscle_2	0.0341053	0.0265623	0.03951	0.0449419	-0.000894449	0.00863693	0.0272625	0.0353473	0.0122872	-0.0526871	-0.0231666	0.0381743	0.0228041	-0.00582603	0.0111958	0.0217557	-0.0364496	-0.0131263	0.0205558	0.0618887	0.00444011	-0.0314735	-0.0189445	-0.0335344	-0.0024	-0.00966971	-0.0242087	-0.0145891	-0.00813715	-0.0605125	-0.0307657	-0.0455133	0.0137795	-0.0492708	0.027437	0.00587277	-0.0383478	-0.0208575	0.0721489	0.0630244	1	0.0545421	-0.0103928	0.00281265	0.0305169	-0.0202253	0.0397706	-0.0170738	-0.0188418
005_Muscle_2	-0.0352631	0.0694072	-0.0843763	0.103509	0.101413	0.132111	0.102999	-0.0204012	0.06574	0.0267187	0.0434397	-0.000853735	0.0784279	0.226156	0.12085	-0.171972	0.0762043	-0.0574484	-0.11749	-0.04505	-0.0955154	0.079472	-0.0260287	0.0506069	0.0208663	-0.0446406	-0.0284449	-0.0959516	-0.0766406	0.0641041	-0.0622523	-0.127088	-0.0924847	0.0207412	-0.118028	-0.0305753	0.0119021	0.0741494	0.117113	0.140366	0.0545421	1	0.0819902	0.0247163	0.0458271	0.0272394	0.0245563	-0.00739644	-0.0790633
006_Muscle_2	0.0264672	0.0112122	-0.0166438	0.0239085	0.0494962	0.0473598	0.0425155	0.0130586	0.0438936	0.0492532	0.0800181	0.00746882	0.0438836	0.110942	0.0425761	-0.0212087	0.00229461	0.00401281	-0.0277783	-0.0273887	0.0154548	0.0177127	0.0368125	-0.0249366	-0.0362825	-0.0112044	-0.0273418	-0.0481722	-0.0447236	-0.0185356	-0.0299604	-0.0699709	-0.0736967	-0.0630814	-0.0669655	-0.0229557	-0.0152912	-0.0314324	0.0503853	0.043127	-0.0103928	0.0819902	1	0.0240934	0.0144603	0.0499498	0.00366684	0.00781201	-0.0227441
007_Muscle_2	-0.0244522	-0.0104746	-0.0266942	-0.0420034	0.0368035	-0.0352974	0.0343633	0.0135902	0.0261344	0.0983878	0.0877419	0.0156712	0.0373801	-0.01794	0.0417971	0.0437893	0.0438946	0.062355	8.17664e-05	-0.00400932	0.0641972	-0.0202487	0.0167285	0.0560722	-0.00699889	-0.080293	-0.0403515	-0.0472584	0.0581146	-0.0128672	0.0135416	-0.070122	-0.0796814	-0.112159	-0.0813186	-0.0141717	-0.0140433	-0.00331858	-0.0311831	0.005621	0.00281265	0.0247163	0.0240934	1	0.0204569	0.0622483	-0.000994469	0.0192675	0.0151609
008_Muscle_2	-0.0190836	0.00377862	-0.0111082	0.0781786	0.0472162	0.0555711	0.0434516	0.023101	0.0028079	0.0493824	0.0181338	0.00366079	0.0240318	0.0505962	0.067514	-0.029168	0.0302031	-0.0596384	0.00668926	0.0192717	-0.0541838	0.0337269	-0.0235334	0.00865261	0.0587769	-0.0266309	0.0061534	-0.0395576	0.0262845	-0.00713327	-0.0111896	-0.0466362	-0.0577017	-0.0451897	-0.0718597	-0.0513622	-0.0491908	-0.014814	0.00123154	0.0298951	0.0305169	0.0458271	0.0144603	0.0204569	1	0.0224918	0.0271598	-0.00597331	-0.0419528
009_Muscle_2	-0.00660078	-0.014895	-0.0151546	0.0151409	0.0393038	0.0505353	-0.0169458	-0.00792402	0.0655672	0.0567739	0.0456124	0.0191763	0.0630657	0.016785	0.0424922	0.0835322	0.0902292	0.053342	-0.0354532	-0.0868871	0.0103647	0.0415762	0.0229868	0.0178103	0.0179531	-0.0364773	-0.0294059	-0.00952041	0.000375776	-0.0201835	-0.0164876	-0.107703	-0.062504	-0.0455104	-0.124629	0.00567884	-0.0115656	-0.0147176	0.00576063	0.0219838	-0.0202253	0.0272394	0.0499498	0.0622483	0.0224918	1	0.0499243	0.0352114	-0.00230436
010_Muscle_2	-0.0300101	-0.0255295	0.0283329	0.0573845	0.015275	0.0565139	0.0159753	0.00556864	0.0548998	0.00455325	-0.00167775	0.0409509	0.0446719	0.0529798	0.0460053	0.109896	0.0719958	0.0230927	-0.0400338	-0.0128805	-0.0298647	0.030578	-0.0166605	0.0146351	-0.0364431	0.0263178	-0.0477987	-0.0433853	-0.0611693	-0.00644141	-0.0598955	-0.0411199	-0.0299921	-0.0117191	-0.0595064	0.00324951	-0.0363923	-0.0283905	0.0340005	0.0320399	0.0397706	0.0245563	0.00366684	-0.000994469	0.0271598	0.0499243	1	0.0580468	-0.0558904
011_Muscle_2	-0.0233012	-0.0511737	-0.0182691	0.00600181	0.0447389	0.0697208	0.0322861	0.0264685	0.0485855	0.0183353	0.017101	0.0424316	0.0522949	-0.00192867	0.0148993	0.0432259	0.107523	-0.000214978	-0.026034	-0.0240557	0.0104056	-0.00943328	0.0170763	-0.0145716	0.000801816	0.00518529	-0.00828455	-0.0214744	0.00971761	-0.0327478	0.00716993	-0.0433681	-0.0485543	-0.0493688	-0.0875799	0.000676778	-0.0033129	-0.0447614	-0.00122602	0.025798	-0.0170738	-0.00739644	0.00781201	0.0192675	-0.00597331	0.0352114	0.0580468	1	0.0136962
012_Muscle_2	-0.0111254	-0.0789642	0.0228427	-0.0504756	-0.0343304	-0.00473044	0.0245319	0.00704979	0.0441033	0.019865	0.0363618	0.0370788	0.00392387	-0.0671047	-0.0202504	0.04697	-0.0100469	0.097066	0.0514174	0.0191784	0.0751645	-0.0429219	0.0479719	-0.0267513	-0.0441824	-0.0145704	-0.0647171	0.037151	0.0123796	-0.0539115	-0.00707599	-0.0171298	0.0151285	-0.0580928	-0.0156523	0.0260098	-0.0150091	-0.0484603	-0.0575069	-0.0431663	-0.0188418	-0.0790633	-0.0227441	0.0151609	-0.0419528	-0.00230436	-0.0558904	0.0136962	1
013_Muscle_2	-0.0443946	-0.00377077	-0.0577339	-0.0346408	0.0674122	0.0495962	0.0216024	0.035879	0.0646612	0.0970477	0.038207	0.00561407	0.0671222	0.0389146	0.0565622	0.0276285	0.0662534	-0.0361476	-0.000626697	-0.0193714	-0.00936245	-0.0109865	0.00572733	-0.0140226	0.0064576	-0.0192223	0.0106182	-0.0234312	0.0303147	-0.00105055	-0.0225467	-0.0502793	-0.0690003	-0.0363424	-0.12676	-0.00240394	-0.0133632	0.00656438	0.00116932	0.00950695	-0.0164415	0.0234381	-0.00730066	0.0261341	0.00998433	0.0600675	0.04575	0.0962696	0.0169081
014_Muscle_2	-5.39665e-05	-0.058771	-0.0241254	-0.0621952	-0.00223199	0.0076202	0.00931952	0.0142743	0.0703898	0.0804241	0.032678	0.0153085	0.0435286	0.0203556	0.0376963	0.0264562	0.0230371	0.0589475	0.00549171	0.0373014	0.0609858	-0.00180299	0.051185	0.0162074	-0.00394476	-0.0551792	-0.0289254	0.0106228	0.00634007	-0.0166478	-0.0236385	-0.0502353	-0.0696009	-0.0699616	-0.0574398	-0.0470127	-0.0360346	-0.0286038	-0.0227991	0.00458203	-0.0285546	-0.0102656	0.00753823	0.0451547	0.0091534	0.0175768	-0.0313394	-0.0161143	-0.00437146
015_Muscle_2	0.00809787	-0.0207548	-0.0189005	-0.0513091	0.00466098	0.0405504	-0.0211799	-0.0261028	0.0553747	0.104861	0.0699105	0.056378	0.0743152	-0.0167839	0.00176789	0.0474696	0.0500235	0.131186	0.00373349	-0.0266126	0.13062	0.00260115	0.0528593	0.0393157	-0.0374549	-0.0533138	-0.0568104	-0.0201705	-0.00780312	-0.0115649	-0.0254334	-0.103845	-0.0801686	-0.11364	-0.112474	-0.0221371	-0.0270478	-0.0125927	-0.0325547	-0.00249923	-0.0182577	0.0150859	0.0588781	0.095885	-0.0336332	0.0432137	0.0121688	0.00742771	0.0341066
016_Muscle_2	0.00531035	-0.0291439	0.0760828	0.00564036	-0.0370479	0.00654025	0.040672	0.0384908	-0.00010854	0.00211055	0.00596833	0.0106214	0.0111966	-0.00185414	-0.0047481	0.0727003	0.0210423	0.0419904	0.0713429	-0.00423543	0.0255414	0.00781429	-0.0198165	-0.0403252	-0.0120849	0.0203782	-0.0475408	0.0201796	0.0120966	-0.0483009	-0.00436724	-0.0261965	-0.00959306	-0.0289983	-0.0493844	-0.0146483	-0.0802887	-0.065588	-0.0160655	-0.0040601	0.0666503	-0.0200663	-0.0162476	-0.00861008	0.0289941	-0.0166433	0.0581178	0.00681466	0.00134711
017_Muscle_2	-0.0323388	0.0641586	-0.068887	0.0765853	0.0696693	0.136332	0.05556	0.0290969	0.0768353	0.0490265	0.0665609	-0.00646201	0.103414	0.242445	0.0587457	-0.0804504	0.0691657	-0.0263459	-0.121336	-0.0637864	-0.0670389	0.0903585	0.0118724	0.00922553	-0.0612477	-0.000223296	-0.0609149	-0.0622143	-0.0954589	0.080986	-0.0668765	-0.12718	-0.103176	0.0173841	-0.124168	-0.0574614	0.0158406	-0.0366599	0.0603081	0.0732908	-0.0410155	0.181359	0.0970561	0.0256124	0.0221365	0.0563944	0.0642588	-0.000613648	-0.0545407
018_Muscle_2	-0.0206837	0.0016327	-0.03422	-0.0391136	-0.0362907	-0.0290048	0.0775175	0.075794	-0.059378	0.00757802	0.00837721	0.0146423	0.00734094	-0.0502091	0.00116847	0.00797197	-0.0426577	-0.0891488	0.0608634	0.0344068	-0.0229886	-0.0765919	-0.0249971	0.0556853	0.0330697	-0.00691559	0.0271411	0.00203695	0.146927	-0.0174927	-0.02822	0.134589	-0.0181993	-0.0311509	0.00408285	-0.0270767	-0.00181096	-0.0239055	-0.0408915	-0.0375023	0.00496884	-0.0803509	-0.0702531	-0.0280704	0.031866	-0.0454034	-0.0287244	0.00679033	-0.0216148
019_Muscle_2	-0.0581625	-0.0017398	-0.0658569	-0.00316634	0.0542648	0.0501909	0.0240287	0.00303157	0.0517114	0.0671407	0.0774714	-0.000738946	0.0830561	0.04155	0.0343233	0.0579759	0.117187	-0.00965821	-0.0236831	-0.0255462	-0.0090883	-0.002641	-0.0164544	0.0340523	0.0455768	-0.0377147	0.0210104	-0.0166356	0.0379904	0.00905815	0.000847546	-0.0366426	-0.141257	-0.0409376	-0.169944	-0.00309514	-0.0325941	-0.00929861	-0.0227739	0.0116236	-0.0495035	0.0145931	0.0221728	0.0583536	0.0258379	0.059916	0.0140482	0.0593994	-0.0188527
020_Muscle_2	0.0470176	-0.00577042	0.0536013	0.0212118	-0.0112885	0.0404751	-0.0410015	-0.00830074	0.0696679	-0.0154019	-0.0265733	0.0346208	0.00505666	0.0489825	0.00360552	0.0349872	-0.0495569	0.0821748	0.00732732	0.0256393	0.00535543	0.0129631	0.0277107	-0.042387	-0.0211843	0.135958	-0.0768805	-0.000359971	-0.0474709	-0.0379484	-0.0508638	-0.052812	-0.0160197	-0.0377942	-0.0313884	-0.0176235	-0.0601396	-0.0593328	-0.0174179	0.03223	0.0795433	-0.00511486	0.0257522	-0.0227563	0.0140419	-0.00802664	0.0743213	0.00284038	-0.0190923
021_Muscle_2	-0.0616139	-0.0369061	-0.055579	-0.0235073	0.00523192	-0.00314167	0.0909147	0.0803039	0.00381471	0.0625032	0.0470579	0.00607641	0.0802731	-0.037717	0.013619	0.0496841	0.0853668	-0.0361679	0.0362002	0.0150736	0.0201099	-0.050358	-0.03557	0.00733207	0.0437096	-0.0172947	0.110731	-0.0106201	0.114894	-0.0446966	0.015165	0.0316258	-0.106783	-0.060153	-0.114708	-0.00334134	-0.0687937	-0.0351825	-0.0371278	-0.00932825	-0.0151527	-0.0263737	-0.0124913	0.0656966	0.0577771	0.0603065	-0.0301529	0.110984	-0.00062497
022_Muscle_2	-0.0231379	-0.0210991	-0.0274274	-0.0385	-0.030912	-0.0339976	0.0213258	0.0163386	0.0182309	-0.0343345	-0.027045	0.000167363	0.0417901	-0.0305099	0.0149737	0.0389694	-0.0154241	0.00472213	0.040003	0.0164486	0.0184029	-0.00674953	-0.00901975	-0.00508194	0.0137602	0.0578887	-0.0263746	0.0918053	0.0152187	-0.0462657	-0.0285417	0.0257166	0.00828417	-0.00385842	-0.0136402	0.0182296	-0.00702811	-0.0447017	-0.0332309	-0.0445595	0.0315682	-0.0680175	-0.040956	-0.0548956	-0.010954	-0.0188721	0.0302536	0.0330824	-0.00262865
023_Muscle_2	-0.0438295	-0.0613351	-0.0665318	-0.0958771	-0.0180051	-0.0185996	0.075277	0.0505065	-0.023693	0.0164367	0.0387481	0.0166123	0.0265563	-0.0590617	0.0306416	0.0694792	0.0362296	-0.00887264	0.076756	0.0464171	0.0475909	-0.0599218	0.0203895	0.0540379	0.0165825	-0.0378505	0.0187664	0.0117447	0.18725	-0.0624593	-0.0304574	0.0978282	-0.0487197	-0.0887862	-0.0460172	-0.0188539	-0.0353462	-0.00958401	-0.0297666	-0.0297584	0.00574844	-0.00855241	-0.0288811	0.0402381	-0.000488052	0.0165349	-0.00540546	0.0436334	-0.0219441
024_Muscle_2	0.0162424	-0.011502	-0.0342096	-0.0411479	0.0192287	0.0173949	0.0186136	0.0252675	0.0407829	0.0779292	0.0233405	0.00243671	0.00635139	0.0302179	0.011126	-0.0232929	-0.00492395	0.0549681	0.0118323	0.00541112	0.0328269	-0.00229864	-0.00819188	0.0224669	-0.0079021	-0.042277	-0.0305359	-0.021528	0.0125303	0.0214967	-0.00639718	-0.0408896	-0.0609595	-0.027569	-0.074893	-0.00557031	-0.0311919	-0.0396821	-0.0271199	0.0119258	-0.00867832	0.0103238	0.017522	0.0213445	-0.0128155	-0.00138124	-0.0281373	-0.0170847	-0.0234436
025_Muscle_2	-0.0133398	-0.0463355	0.0514175	-0.0335624	-0.0095747	-0.0537309	-0.0659899	-0.00802983	0.0131017	0.02544	0.00688794	0.00994109	0.0187539	-0.0483101	-0.0241734	0.0478312	0.0200074	0.0812266	0.0557596	0.0265887	0.0780231	-0.0384783	0.0131657	-0.0193052	-0.00319348	-0.0521371	0.0120896	-0.00899484	0.0128862	-0.0496575	0.060372	-0.0276288	-0.0312833	-0.0335473	-0.0113708	0.0157197	-0.0263171	-0.0495876	-0.0594258	-0.0490423	-0.047219	-0.0691273	0.00904747	0.0129845	-0.072291	-0.00410043	-0.0121565	0.0160141	-0.00888294
026_Muscle_2	-0.0482545	-0.020351	-0.0751383	-0.0563857	-0.0124703	0.0187881	0.0677955	0.0289204	0.00133243	0.0309918	0.00113281	-0.00173902	0.0168995	-0.0023846	0.0111188	0.0330328	0.0378388	-0.00257189	0.000364275	0.0324505	0.0494076	0.00287163	-0.0441048	0.0634783	-0.0234194	0.00387596	0.0173481	-0.0139079	0.094213	-0.0209804	-0.0380667	0.161679	-0.0654535	-0.0660559	-0.0543474	-0.0181854	0.00314157	-0.0436547	-0.0429259	-0.0195475	-0.00919074	-0.00770507	-0.00420735	0.0183889	-0.011962	-0.0231849	-0.0216597	0.0155603	-0.0274758
027_Muscle_2	0.0182538	-0.0354261	0.0374793	0.0081892	0.0162882	0.0135928	-0.0464108	-0.0367461	0.0292873	-0.00723314	-0.0275393	-0.00089852	0.00731183	0.00752099	-0.00751701	0.0818195	0.0388349	0.0688006	-0.0175357	-0.048589	0.00465696	0.0444557	-0.00551356	-0.0355479	0.00307358	0.0417527	-0.065159	0.0200839	-0.0353666	-0.0031637	-0.0309763	-0.0312874	0.0697842	0.00145183	-0.0243416	0.0091157	-0.00312569	-0.0635616	-0.0287439	-0.0205596	-0.00851525	-0.0176279	-0.020264	-0.0311001	-0.0218983	0.0460778	0.0584724	0.002328	-0.0376438
028_Muscle_2	0.00740145	-0.0186624	0.0479533	-0.0130211	-0.0766389	-0.0797312	0.00297926	0.00317608	-0.0262102	-0.0778324	-0.0273288	-0.0124686	-0.030772	-0.0305133	-0.0082793	0.0447225	-0.0559081	-0.00244472	0.0671641	0.0383009	0.0463803	-0.0253035	0.00145763	-0.050231	0.0209636	0.0559019	-0.00326742	0.0235732	-0.0109678	-0.0313357	-0.00324303	0.0519532	0.0505526	0.0136274	0.0562484	0.0480419	-0.0407643	-0.0653419	-0.0443236	-0.0609132	-0.00963007	-0.0830641	-0.0558799	-0.0572529	-0.0402978	-0.0523495	-0.047655	-0.0328794	-0.02328
029_Muscle_2	-0.0381887	0.00587373	-0.0228291	0.0485156	0.0193525	0.00454302	0.0217614	-0.0247033	0.0145725	-0.010058	0.0182448	-0.0220475	0.0078345	0.0864245	0.00252027	-0.0708014	0.0112951	-0.0194949	-0.0372059	0.020759	-0.0361062	0.0474288	-0.0227468	0.0285283	0.0251356	-0.00718819	-0.0202887	0.0138217	-0.0529517	0.0323917	-0.000843269	-0.0341855	-0.0429972	0.0335493	0.00658769	-0.0114666	-0.00148373	-0.0436887	0.023145	0.018766	0.00306862	0.106158	0.0247193	0.00648981	0.0238361	-0.0164576	0.0234687	-0.0299408	-0.0352728
030_Muscle_2	-0.00500471	-0.0164912	0.0371324	0.039555	-0.0130054	-0.0395988	-0.0126747	-0.0319454	0.00636342	-0.0494107	-0.0213365	-0.0194506	-0.0228537	-0.0436374	-0.0285369	0.0218909	-0.0388437	0.0028411	0.00625242	0.0194482	-0.019835	0.0207348	0.00869858	-0.0112875	-0.00608642	0.0250891	0.029571	-0.00640749	-0.020485	-0.00258072	0.0234594	0.00838865	0.0352334	0.022594	0.0520439	0.0491435	-0.0229089	-0.0430842	-0.000476977	-0.0389217	0.0204979	-0.0660244	-0.0349477	-0.0742118	-0.0314502	-0.019499	0.013709	0.0125623	-0.0434545
031_Muscle_2	0.00382087	-0.0230714	-0.0250321	-0.0553646	-0.00706234	-0.0208838	-0.0286306	-0.0466601	0.00877575	-0.0047557	0.0202761	0.00168549	0.00511805	-0.0455868	-0.0450281	-0.000441018	0.0289378	0.014493	0.00365126	-0.000632021	0.0541881	0.0104918	0.0101383	0.0250408	0.0443951	-0.0461768	0.0166182	0.0325252	0.0316514	0.0130989	-0.00463826	-0.00689667	-0.0292516	-0.00983701	0.0190305	-0.00722941	0.0389311	-0.043052	-0.0631501	-0.0412351	-0.0563681	-0.0412885	-0.0476327	0.000379666	-0.0501979	-0.0267603	-0.0514607	-0.0430563	-0.0372463
032_Muscle_2	0.0131654	-0.0351486	0.00970961	-0.0479569	-0.0243077	-0.0409647	-0.0646242	-0.0307649	0.011604	0.0156009	0.00319931	0.00523322	-0.0100979	-0.0878876	-0.0603757	0.0290792	0.00904978	0.121376	0.035446	0.0170381	0.0595512	-0.00667767	0.0384391	0.00785064	-0.0242142	-0.0258849	0.0188571	0.026347	0.015714	-0.0304982	-0.00876683	-0.0366638	0.0642037	-0.0259119	0.0277812	-0.0270631	0.0279086	-0.0113065	-0.0605368	-0.0458843	-0.0368711	-0.070112	-0.0540584	0.00408559	-0.0682026	-0.0225121	-0.0348888	-0.0498032	-0.0106665
033_Muscle_2	0.00311358	0.0191109	0.0198498	0.00760538	0.00134978	-0.0121199	-0.0370229	-0.00770826	0.00297022	-0.00437382	0.0109381	-0.0521236	-0.000420751	-0.042925	-0.0186166	0.0250309	-0.00875828	-0.00152982	-0.0182074	-0.0319579	-0.0189545	0.0155031	0.00874984	0.0270424	0.0158201	0.0047778	0.0387542	0.0262376	-0.00458514	0.00435316	0.00487572	0.0330209	0.0128102	0.00604496	0.00479933	-0.0198145	0.0116997	-0.00502134	-0.0718954	-0.0532914	-0.0751929	-0.0946871	-0.00675217	-0.0394337	-0.0330608	-0.0106848	-0.0355555	-0.0209245	-0.0291042
034_Muscle_2	-0.00370713	-0.0146989	0.00916033	-0.00850995	-0.0110863	-0.0491142	-0.0117195	-0.0407901	-0.024373	-0.0324684	-0.0167521	-0.004252	-0.0160597	-0.0402279	-0.0331684	-0.0131759	0.00856369	0.0198284	0.0218559	0.0310824	-0.00535079	0.00425713	0.00449451	-0.00563622	-0.0222323	-0.0188556	0.0343278	0.038019	-0.0182107	0.0174493	0.0238024	0.00902433	0.00579191	0.0285556	0.0406912	0.00921604	0.0226575	-0.0883697	-0.0406673	-0.0710051	-0.0603424	-0.039305	-0.0451553	-0.0339487	-0.0467609	-0.03134	-0.0269567	-0.0135599	-0.0223012
035_Muscle_2	-0.0282253	0.0577837	0.0290536	0.0577201	0.0976295	0.0874189	-0.0294814	-0.0572215	0.00645498	-0.0276182	-0.0485861	-0.0469509	-0.0237614	0.0417248	-0.0153756	-0.0391975	0.0194518	-0.0587515	-0.156472	-0.0814368	-0.111323	0.0646156	-0.0546257	0.0102692	-0.000410474	0.112724	-0.0249122	0.00908556	-0.0807086	0.0953929	0.0158547	0.00460126	0.0164047	0.0955265	0.0129335	0.0376177	0.0641647	-0.0704391	-0.0279137	-0.00280816	-0.0882359	0.0185566	-0.026361	-0.0984773	-0.0936157	-0.00493313	-0.025887	-0.0774669	-0.106584
036_Muscle_2	0.0275838	0.00946347	0.0615905	-0.0672349	-0.0365062	-0.0736101	-0.0510088	-0.0702482	-0.0211788	-0.0409555	-0.0428156	-0.00257209	-0.0866311	-0.0891722	-0.0850042	0.0588369	-0.0517561	0.0874671	0.0548828	-0.00184072	0.0512788	-0.0411492	0.0244392	-0.0393359	-0.0278342	0.0349885	-0.0258881	0.0278382	-0.00244091	-0.0343142	0.0465936	0.0279955	0.0880508	0.0170756	0.131255	0.0224013	0.020006	-0.0722113	-0.0751412	-0.119642	-0.0121235	-0.110531	-0.0827179	-0.0407884	-0.0898111	-0.0658205	-0.0547769	-0.0804896	-0.0158222
037_Muscle_2	0.0144116	-0.0025625	0.0319296	0.00915725	-0.048923	-0.0865957	-0.0204441	0.00911209	-0.0881123	-0.0655559	-0.0677708	-0.0127858	-0.059022	-0.0939457	-0.0407537	0.0178496	-0.0987438	-0.0490154	0.0199159	0.0475827	-0.0338056	-0.0455035	-0.0386305	-0.00724221	0.00532622	0.0377133	0.0566146	0.0470663	0.0240396	-0.00373571	0.0559178	0.131206	0.0617942	0.043227	0.122575	0.0275257	0.0283514	-0.0587606	-0.0626292	-0.0776987	-0.0209741	-0.150634	-0.102742	-0.0864358	-0.0176278	-0.075735	-0.0605726	-0.0924974	-0.0673327
038_Muscle_2	0.00814099	-0.0111664	0.089105	0.0113375	-0.0928305	-0.0930196	-0.0587086	-0.0522187	-0.088347	-0.112667	-0.0902524	-0.0230616	-0.0915104	-0.091226	-0.0607411	0.0686287	-0.0677961	0.0252771	0.0579276	0.0333032	0.0126529	-0.0363493	0.020827	-0.0579022	-0.00902757	0.069186	-0.0206372	0.0538899	-0.0378233	-0.0287759	0.0461892	0.0831785	0.143193	0.0895483	0.16597	0.0184969	0.0295823	-0.0937577	-0.0937925	-0.0963898	-0.0107544	-0.15905	-0.0952758	-0.142821	-0.0730504	-0.0997809	-0.0457774	-0.0890613	-0.0287666
039_Muscle_2	-0.00467564	0.0316022	-0.00948983	-0.0270436	-0.0304896	-0.0455369	-0.0121579	0.0219768	-0.0795638	-0.0314614	-0.0271569	-0.0339323	-0.0682363	-0.0289977	-0.0157938	-0.0554316	-0.0515273	-0.0601812	-0.000669006	-0.0149099	-0.00659104	-0.0234754	-0.0243902	0.0121994	0.0306516	0.00557565	0.0434227	0.0460355	0.0299788	0.0187944	-0.00267336	0.103393	0.0461167	0.068599	0.0757067	0.0302587	0.052827	-0.0383787	-0.071899	-0.0730638	-0.0895542	-0.0574873	-0.0460422	-0.0570902	-0.0579244	-0.0594696	-0.0558699	-0.0803622	-0.0660054
040_Muscle_2	0.013521	0.00410355	0.0239302	0.028673	0.00376237	-0.00483769	-0.0336894	-0.0199699	-0.0501653	-0.054645	-0.0656816	-0.0467517	-0.0267077	0.00237222	-0.0439703	-0.0288632	-0.000362117	-0.0687133	-0.0365984	-0.0247916	-0.0419407	0.0168813	-0.00645463	0.0238764	-0.0108871	0.0243672	0.0224306	0.0273771	-0.0213428	0.0549948	-0.00974395	0.0747202	0.0658012	0.082531	0.0718732	0.000670109	0.0569641	-0.0578946	-0.0415492	-0.0495982	-0.0626797	-0.0773207	-0.0921816	-0.0912618	-0.0684944	-0.0657408	-0.0545339	-0.0814842	-0.0576639
041_Muscle_2	0.00857688	0.0684101	0.000727481	0.0686053	-0.000906077	0.0325497	-0.0317989	-0.0490284	-0.0236859	-0.057642	-0.0317335	-0.0169365	-0.0531747	0.0468565	-0.00940116	-0.121413	-0.034004	-0.0890921	-0.0695733	-0.0308132	-0.0812034	0.057008	-0.0520951	-0.0155143	0.0266298	0.0281675	0.020061	0.000152262	-0.0720591	0.0746887	0.0275233	0.00230188	0.0660088	0.0952762	0.0888211	0.026693	0.0405112	-0.0237527	-0.0145541	-0.038411	-0.0457149	0.0154387	-0.0735123	-0.102702	-0.0571885	-0.0908712	-0.0422508	-0.0825633	-0.0672219
042_Muscle_2	0.030433	0.04296	0.0306681	0.0257656	-0.00459366	-0.01718	-0.0347337	-0.00974788	-0.0394205	-0.0353499	-0.0373688	-0.0405996	-0.0435244	0.00346972	-0.0328112	-0.084126	-0.0787124	-0.0671207	-0.00776159	-0.0103152	-0.0723515	-0.00101378	-0.0133237	-0.0110284	-0.00422801	0.00918256	0.0377198	0.0015229	-0.039042	0.0502809	0.0183436	0.0241442	0.0736253	0.0778081	0.107324	0.019396	0.0380733	-0.0676195	-0.0116006	-0.0598551	-0.0471245	0.00144408	-0.0482122	-0.0971797	-0.0470641	-0.0884149	-0.0854366	-0.0683969	-0.0624045
043_Muscle_2	0.0211468	0.0734619	-0.0111873	0.0616412	-0.00954663	0.0150206	-0.0390071	-0.0537117	-0.0599788	-0.0644834	-0.0522598	-0.0317928	-0.0723906	-0.00203476	-0.0280671	-0.117624	-0.066779	-0.0879494	-0.05625	-0.0372526	-0.0809464	0.0325843	-0.0484012	-0.013158	0.00128819	0.0252258	0.0772507	0.00895691	-0.0508421	0.0612991	0.029236	0.0574743	0.105283	0.161892	0.110148	0.0287064	0.0573708	-0.0467021	-0.0266246	-0.0601997	-0.0791668	0.000812459	-0.0945337	-0.140501	-0.064305	-0.107357	-0.0859764	-0.114454	-0.0935896
044_Muscle_2	0.0546332	0.0365383	0.0273875	-0.0310559	-0.046377	-0.0998374	-0.0428123	-0.058814	-0.0659723	-0.0912744	-0.0545945	0.00283999	-0.109901	-0.0676364	-0.0731683	-0.0402766	-0.105979	0.0100694	0.0597163	0.0276343	-0.000999297	-0.0506641	0.0285188	-0.0421669	-0.00507061	0.0529104	0.0230802	0.00799306	-0.0228477	0.0146661	0.0549621	0.0425428	0.129716	0.0627038	0.14963	0.0283993	0.0301392	-0.0500975	-0.0800836	-0.111773	-0.0391148	-0.104678	-0.104305	-0.120298	-0.105904	-0.123517	-0.0865427	-0.0733397	-0.0419756
045_Muscle_2	0.0228104	-0.0244514	-0.00467357	-0.0459079	-0.0534825	-0.0476453	-0.0307805	0.0427456	-0.0778784	-0.0368205	-0.0440214	-0.0132672	-0.0716488	-0.0806321	-0.00573326	-0.00933504	-0.0267376	-0.0466783	0.0364844	0.0285184	0.00909334	-0.0344421	-0.00591453	-0.00418622	0.0134548	-0.00340168	0.0576032	0.0289359	0.0273679	-0.0146582	0.0259798	0.103583	0.0781855	0.0395054	0.103078	0.00232514	0.0263776	-0.0398809	-0.0708848	-0.102723	-0.0501273	-0.129155	-0.0943864	-0.080728	-0.0537002	-0.093291	-0.122433	-0.0498517	-0.051071
001_Muscle_3	0.0269493	0.016057	0.0298632	0.0369392	0.0035949	-0.0200829	-0.0132926	-0.0462514	-0.0368417	-0.047932	0.00054711	-0.0235102	-0.0193481	-0.0167177	-0.0529745	-0.0525637	-0.0413407	-0.0327894	-0.0347732	-0.00766201	-0.000334321	0.00198028	-0.0024772	-0.0106801	-0.00104966	-0.000540326	0.0399528	0.0130239	-0.0523262	0.0380465	0.00479685	-0.00266547	0.078212	0.0464376	0.0611433	0.0204258	0.0370414	0.0175448	-0.00303892	-0.0105571	0.0227351	0.00619871	0.0180428	-0.0416109	-0.0337177	-0.0382794	-0.0044504	-0.0341223	-0.0294936
002_Muscle_3	0.0541142	0.104142	0.0875796	0.0773647	-0.0180382	-0.0240985	-0.0587676	-0.0671683	-0.0400425	-0.111276	-0.0671129	-0.035078	-0.0639808	0.00445203	-0.0139142	-0.0509881	-0.0517849	-0.0314594	-0.0139383	-0.00207423	-0.040767	0.0529165	-0.0349264	-0.0636548	-0.0118513	0.0575521	-0.0317673	-0.0178976	-0.12036	0.0515696	0.0160721	-0.0631096	0.0613838	0.11804	0.118444	0.0238641	0.039334	0.0277312	0.0204381	0.00251484	0.0301319	0.0401534	-0.01797	-0.091629	-0.0332192	-0.0353267	-0.0360687	-0.084099	-0.0426699
003_Muscle_3	0.0320844	0.0510909	0.0218477	0.0574587	0.00424776	0.00211748	-0.0032897	-0.00683574	-0.0498728	-0.066655	-0.024481	-0.0038123	-0.0339219	0.0561368	-0.0277334	-0.0610305	-0.0466451	-0.0626397	-0.0362174	-0.0129666	-0.085905	0.0262852	-0.00612355	-0.0290272	-0.0521386	0.0336265	0.003097	-0.0161668	-0.0357528	0.0637619	-0.0101448	0.0152498	0.0445286	0.0906426	0.0694574	-0.0125925	0.061726	0.0296411	0.0136184	0.00283535	0.0116573	0.0464057	-0.0457859	-0.0690821	0.00503291	-0.0582143	-0.00110919	-0.0670419	-0.0686906
004_Muscle_3	0.0337855	0.0946606	0.00135398	0.099144	0.0275654	0.0662754	-0.0273294	-0.0369164	0.0157601	-0.0401485	-0.0422487	-0.0121181	-0.0214299	0.109844	0.000602023	-0.118521	0.0202008	-0.0581036	-0.0945453	-0.0568117	-0.0981842	0.0274884	-0.0374271	-0.00427575	-0.0145326	0.00275396	-0.0263859	-0.0369616	-0.066441	0.081322	-0.00424977	-0.0161713	0.0030488	0.119101	0.0202142	-0.013431	0.0639686	0.017043	0.051956	0.0260048	0.0186304	0.149181	-0.0205608	-0.0565156	-0.00435575	-0.0321053	-0.0160147	-0.0863768	-0.0661289
005_Muscle_3	0.00411812	0.0295238	-0.00536775	0.0581478	0.0273704	0.0212325	0.0430548	0.0456497	-0.0106178	-0.00848049	-0.00592217	0.00858968	-0.00763578	0.00852624	0.00517959	-0.0300618	-0.00336232	-0.0397782	-0.0435844	-0.0296341	-0.0462481	-0.00997105	-0.02685	-0.00839516	0.0253009	0.00648503	0.0195951	-0.0302606	-0.00392104	0.0407163	0.00829618	-0.00207726	-0.0234957	0.0444829	-0.0280412	-0.01535	0.0106663	-0.004027	0.015121	0.0140817	0.00237437	0.0388781	0.0141302	-0.0394587	0.0220097	0.016564	-0.0404025	0.000159279	-0.022324
006_Muscle_3	-0.0105121	0.0332135	-0.0470159	0.0413127	0.0397557	0.0673526	0.0484237	0.0496137	0.00328804	0.0021357	0.0105749	-0.0234187	0.0310519	0.0432159	0.0627703	-0.0101403	0.00252727	-0.0964763	-0.0497282	-0.0125163	-0.0692589	0.00609368	-0.034045	0.049677	-0.0117995	0.0408983	-0.00425257	-0.0345876	0.0411163	0.0341934	-0.051376	0.0526917	-0.0417047	-0.0197821	-0.0449759	-0.0179688	0.0164311	0.00829235	0.0264378	0.018272	0.0204988	0.0647161	0.00623342	0.00975932	0.0464057	-0.0145937	0.00103248	-0.00627102	-0.0425908
007_Muscle_3	0.0150432	0.00932644	0.044875	0.0644597	0.0180183	0.0374902	0.0242719	0.0175541	0.00499757	-0.0384971	-0.00553689	-0.0294093	0.0321331	0.0984375	0.0582494	-0.0338838	0.00407672	-0.0530858	-0.0541035	-0.04211	-0.0607446	0.0295265	-0.000205526	-0.0125233	-0.0191937	0.0896768	-0.10218	-0.039578	-0.0368006	0.0213726	-0.020851	-0.00487881	0.00251905	0.0331727	-0.0153598	0.000991662	1.42202e-05	0.0131989	0.124102	0.0563973	0.0445519	0.0511779	0.0302516	-0.0372008	0.0084948	0.00113857	0.0675615	-0.0289433	-0.0354238
008_Muscle_3	-0.0227146	-0.0100726	-0.00623255	0.0448605	0.0640848	0.0944135	0.0559402	-0.00848479	0.0241227	0.0356362	0.025187	-0.0106964	0.0832159	0.0966888	0.0508861	0.0530179	0.0893066	0.015245	-0.0699473	-0.0250496	-0.0605716	0.0323898	-0.00205808	0.0237313	-0.02663	0.0138039	-0.0742631	-0.0341099	-0.0333568	-0.000926904	-0.0381889	-0.046307	-0.0905434	-0.00840988	-0.126552	-0.000128066	-0.00908108	0.0359288	0.0558424	0.08073	0.0034182	0.0713898	0.0635628	0.0747146	0.0312456	0.0978609	0.0851715	0.0475123	0.000740871
009_Muscle_3	0.00888571	0.00155493	0.0360315	0.0865621	0.0431402	0.0612707	0.0152628	-0.0016594	0.0570766	0.0243982	0.00820613	0.0237138	0.0394784	0.0964043	0.076124	0.0558158	0.029662	0.00440205	-0.0328687	-0.0356159	-0.053633	0.0670562	-0.028584	-0.028538	-0.0301328	0.0912822	-0.0773872	-0.0380644	-0.074564	-0.00921183	-0.0351823	-0.091326	-0.0492839	0.00892801	-0.0958686	-0.0255892	-0.0456548	0.0257878	0.0775473	0.076874	0.0646871	0.0835624	0.0559453	0.00427161	0.0469775	0.0461848	0.123387	0.0247438	-0.010166
010_Muscle_3	0.0353257	-0.0505077	0.00402415	-0.012829	-0.0268189	-0.00805339	0.0473593	0.00367733	-0.0291491	0.0635007	0.015431	0.0462408	0.0367624	-0.0687209	-0.00115912	0.0355236	-0.0146736	0.0579731	0.0566423	0.0252711	0.061076	-0.0181219	0.00990109	0.00924183	0.0139829	-0.0308403	-0.0230558	-0.00178882	0.0525978	-0.066331	0.0102606	-0.0123258	-0.0243358	-0.107264	-0.041577	-0.0111481	-0.0424923	-0.0272344	-0.0213233	-0.00188862	0.0191922	-0.03531	0.0296194	0.0532833	0.00680509	0.0317276	0.0155364	0.0680548	0.0655329
011_Muscle_3	-0.0222915	-0.0192122	-0.0255267	-0.0496866	-0.000464353	-0.0204128	0.0178479	0.0403246	0.0338455	0.0386035	0.0359139	0.0313578	0.0465547	-0.0257265	-0.0113558	0.0686207	0.00903374	0.0280556	0.0551878	0.0225989	0.0779166	-0.0311227	0.0495295	0.00272533	0.0134985	-0.0244478	-0.0242801	0.0172578	0.0496779	-0.0605723	-0.0383828	-0.0259555	-0.0338437	-0.081934	-0.0328522	-0.0227959	-0.0444054	0.00192977	-0.00127935	0.0267083	0.0011972	-0.0306352	0.0506675	0.0565186	0.0240003	0.0174968	-0.000610815	0.0890937	0.00849278
012_Muscle_3	-0.0323525	-0.0556708	-0.102395	-0.0585118	0.000543723	0.0788727	0.0637688	0.0622466	0.077174	0.107483	0.0565344	0.0538433	0.0767356	0.031031	0.0419517	0.0126786	0.0433234	0.0179433	0.0111071	0.0307413	0.0531697	-0.0253226	-0.00381375	0.0390038	0.0151425	-0.0711412	-0.0250429	-0.0144493	0.0876005	-0.0137784	-0.0735768	-0.0109205	-0.0926361	-0.0985585	-0.0856836	-0.0515486	-0.0354877	0.0251725	-0.0107147	0.0240683	-0.00239469	0.066903	0.0346662	0.108653	0.0374183	0.0408286	-0.00769268	0.0518023	0.0250684
013_Muscle_3	-0.0138076	-0.0189877	-0.0194352	0.0121906	-0.00793284	-0.00881654	0.0724962	0.0681332	0.00530655	-0.0196602	0.000225569	0.0292913	0.0477254	0.0631481	0.0641347	0.028755	-0.0213177	-0.0352229	0.0419562	0.0341263	-0.015035	-0.0235873	-0.0126595	-0.0236611	0.0244882	-0.015327	-0.00376073	-0.0310281	0.0210209	-0.0279296	-0.0110312	0.00309113	-0.0569514	-0.0220293	-0.0307753	0.0207522	-0.0822857	-0.0105657	0.0512586	0.0171577	0.0542277	0.00837152	-0.0064985	0.014832	0.0316202	0.019448	0.0477728	0.0445492	0.0171198
014_Muscle_3	0.0250603	-0.0281153	0.032743	0.0147119	-0.0602739	-0.0417392	0.0319888	0.0171437	0.00629747	-0.0167182	-0.00126613	-0.00541832	0.0322091	-0.0482313	0.0222347	0.0993819	0.00734629	0.044247	0.0694173	0.0595348	0.0581963	-0.0140903	0.0103053	-0.0211829	-0.00685622	0.0340606	-0.0165646	-0.0294061	0.0474724	-0.0763519	-0.0299029	0.0166898	-0.0063601	-0.0749614	-0.00714818	-0.00237224	-0.100644	0.0175491	0.000617117	0.0126574	0.0579587	-0.0525176	0.000230553	0.0464891	0.021432	0.0009579	0.063617	0.086356	0.0574438
015_Muscle_3	-0.0635608	0.0244643	-0.0899336	0.100709	0.103522	0.19209	0.101075	0.0363049	0.0861049	0.134526	0.0432443	-0.0274559	0.102154	0.254277	0.149736	-0.0800661	0.104672	-0.0223148	-0.175628	-0.0973438	-0.102382	0.0921236	-0.0311241	0.0613121	-0.0211666	-0.0221053	-0.0680825	-0.0872538	-0.0510999	0.110694	-0.0543684	-0.116747	-0.15183	-0.00180249	-0.175043	-0.0843807	0.023717	0.0464218	0.114539	0.0958471	-0.0362925	0.269452	0.109787	0.0589273	0.0611283	0.0800973	0.0675526	0.0186471	-0.0213057
016_Muscle_3	-0.012192	-0.0490068	0.010684	-0.0872094	-0.0197429	-0.068292	0.0121985	0.0443339	-0.00467788	0.0230223	0.0693128	0.0511612	0.00890805	-0.0911633	-0.0227754	0.0870353	-0.02398	0.0643495	0.109666	0.0739903	0.11351	-0.0723613	0.0202566	-0.014153	-0.0141262	-0.0272791	0.0238559	0.0231828	0.0649899	-0.0864123	0.036319	0.00714295	-0.0615363	-0.0953222	-0.0316674	-6.41201e-05	-0.0903927	-0.0105008	-0.0303139	-0.0292309	0.0198666	-0.099711	0.0284283	0.0507705	0.0425052	0.0188644	0.00504577	0.0645298	0.0514018
017_Muscle_3	-0.0430779	0.00469918	-0.0440926	0.0658568	-0.00123406	0.0590537	0.0981865	0.0793283	0.0136558	-0.0258045	-0.0129178	0.00661648	0.0119533	0.106236	0.0985104	0.0134908	-0.00385177	-0.0813633	-0.0242772	-0.00201907	-0.0844347	0.010793	-0.0572361	0.00967731	0.0332639	0.103261	-0.0168733	-0.0404112	0.0246415	-0.0393019	-0.040202	0.0378725	-0.0240259	0.00581888	-0.0584604	-0.00937609	-0.029317	-0.0195851	0.0808337	0.0405721	0.0825307	0.0421224	-0.0245528	-0.0255993	0.0458582	-0.00388831	0.0641934	0.0529179	0.00668928
018_Muscle_3	0.0179058	-0.00401512	-0.0253593	-0.00837825	-0.0176831	0.0156967	0.0916046	0.102222	-0.00869563	-0.0212185	0.0300902	0.0469806	0.0304653	0.0386395	0.0378228	-0.0222544	-0.052556	-0.0780661	0.0269827	0.0539776	0.0156374	-0.0412197	-0.00239181	-0.000176064	0.000881191	-0.0055924	-0.00736458	-0.0147394	0.0656669	-0.0377884	-0.100329	0.0587618	-0.0284334	-0.0468091	-0.027331	-0.0352992	-0.0102075	0.0169481	0.0300953	0.0258194	0.0898698	0.0529581	0.00734227	-0.00216777	0.0188718	-0.02971	0.0168596	0.0225787	0.00750258
019_Muscle_3	-0.060362	-0.0566663	-0.0466257	-0.0343248	0.0222141	0.0745718	0.0340493	-0.000342397	0.0904547	0.10584	0.0599029	0.016406	0.0592225	-0.0102953	0.0581517	0.0994715	0.0990122	0.109677	-0.0111365	-0.0281995	0.0609395	-0.0130451	0.0302294	0.0447698	-0.0177855	0.00150769	-0.0507742	-0.00036182	0.0643375	-0.0227446	-0.0421863	-0.0306196	-0.0904398	-0.136948	-0.138037	-0.0504639	-0.0164227	-0.0300933	0.000607124	0.00761647	-0.0245649	0.00183131	0.0589639	0.103302	0.0137364	0.109909	0.0153188	0.0412587	0.0491403
020_Muscle_3	-0.0333472	0.00284135	0.03561	-0.0105765	-0.00762666	-0.0221389	0.0211049	0.0168496	0.00579551	0.0216173	0.0082375	-0.00717825	0.00652423	0.000709689	-0.0118038	0.0396518	0.0187165	0.0271057	0.0325827	0.0229971	0.00469202	0.00974981	0.00915195	-0.00924178	0.0310903	-0.0185029	-0.0167775	0.00165939	-0.000194707	-0.0412859	0.0138398	-0.0265266	-0.00799975	-0.0566033	-0.0261848	0.00355425	-0.044195	-0.0266111	0.0275341	0.000389115	0.0144192	-0.0226138	-0.00788352	0.023841	0.0305521	0.013759	0.0400166	0.0381457	0.0282228
021_Muscle_3	0.0101796	-0.0471344	0.0598684	0.0177086	0.0193898	-0.00416432	-0.0214723	-0.0208456	0.0793855	0.0591919	0.0410921	0.060866	0.0497301	0.0449668	0.0292074	0.0672987	0.0457701	0.121581	-0.0012337	-0.0124817	0.051528	0.0475682	-0.0036218	-0.0369487	-0.0339492	0.00208916	-0.0570954	-0.0219116	-0.0838938	-0.037271	-0.0041679	-0.147901	-0.0552077	-0.0499622	-0.0579021	-0.0295281	-0.0638464	0.0181159	-0.000990641	0.0378122	0.0309882	0.0189897	0.0579563	0.0402828	0.0185037	0.0742444	0.0798726	0.0276097	0.0340872
022_Muscle_3	0.000558345	-0.0514398	-0.0327802	-0.0788579	-0.0264864	0.0216386	-0.019141	-0.00130642	0.0492413	0.061435	0.0511904	0.0403538	0.04867	-0.0470646	-0.00489338	0.047389	0.0347219	0.105688	0.0355427	0.0249421	0.0919177	-0.0255666	0.0491714	0.00723257	-0.0222345	-0.0196885	-0.0354074	0.0325077	0.0194103	-0.0725846	0.0112547	-0.0487863	-0.0196134	-0.0956145	-0.0441178	-0.0225752	-0.0450618	-0.00154787	-0.0131182	-0.00739272	0.0179138	-0.0314914	0.052218	0.0435792	-0.00932541	0.0158073	-0.00530571	0.0576723	0.0479178
023_Muscle_3	-0.0235051	-0.0830622	-0.0196	-0.105797	-0.0127219	0.00537294	-0.00108675	-0.00271606	0.0487564	0.0942898	0.05268	0.0337002	0.0358882	-0.0204996	-0.00521007	0.0831434	0.0554605	0.120153	0.0531429	0.00229824	0.0893591	0.013838	0.0170025	0.0208431	-0.0191859	-0.051851	-0.0347122	0.0417709	0.0306624	-0.0349238	0.00226026	-0.0642723	-0.045249	-0.083107	-0.101333	-0.0231899	-0.0310475	0.0118571	-0.0135021	-0.0334759	-0.0178316	-0.0476481	0.0197894	0.0561255	0.000803613	0.0528119	0.02502	0.0570267	0.057854
024_Muscle_3	0.00191197	-0.0206339	-0.0777785	-0.0674583	0.0102356	0.00971417	0.0392808	0.0382192	0.0428274	0.102986	0.0527982	0.0168907	0.046914	0.0177528	0.0397539	-0.00473884	0.00914261	0.0230741	0.0178075	0.0296557	0.0705177	-0.0216631	0.0160701	0.020602	-0.00402835	-0.068718	-0.00402901	-0.0181191	0.0620849	-0.014167	-0.015525	-0.0191354	-0.100162	-0.102584	-0.0554902	-0.0355241	-0.0215541	0.0134397	-0.00516776	0.0329324	0.0135534	0.0527989	0.0416322	0.07239	0.0268237	0.0208094	-0.0109143	0.030828	0.00676892
025_Muscle_3	0.0140433	-0.0310289	0.0244921	-0.0219713	6.71875e-05	0.0144031	-0.0437791	-0.0471121	0.07472	0.0510015	-0.000897049	0.0182333	0.0428246	0.0180299	0.0121235	0.033753	0.0474003	0.0870558	-0.0129591	-0.00263616	0.0673129	0.0329028	-0.0132625	-0.0281877	0.0192899	0.0169428	-0.0463077	0.02825	-0.0344729	-0.00996844	0.00345447	-0.118379	-0.0170413	-0.0246093	-0.0689852	-0.0148647	-0.053974	-0.00612443	-0.0358643	0.0171962	0.0222211	0.0150039	0.0384615	0.0370268	-0.023742	0.026142	0.0367298	0.0201485	0.0542434
026_Muscle_3	-0.00444839	-0.0266984	-0.0372358	-0.0613893	0.0421063	0.0336812	-0.0116216	-0.00496706	0.0511069	0.121598	0.0534948	0.0468306	0.0375675	0.00820205	0.014908	0.00329853	0.0515521	0.0737119	0.0103644	-0.0161874	0.0711873	-0.0248389	0.0184269	0.039779	-0.0112315	-0.0930097	-0.0072289	-0.0308203	0.0241473	-0.0147962	0.0079707	-0.06953	-0.0748933	-0.088163	-0.0546106	-0.0296798	-0.0304005	0.00129804	0.00944206	0.0436405	-0.0154408	0.029769	0.0258263	0.0900253	-0.000969784	0.0620551	0.0171211	0.00945072	0.0181087
027_Muscle_3	0.0168928	-0.0208696	0.0293192	-0.0182361	0.0289744	0.00315088	-0.0460281	-0.0773108	0.0619531	0.0613618	0.0174868	0.0539867	-0.00146888	0.0402023	-0.0209243	0.0418803	0.0466447	0.141366	-0.00361394	-0.00713676	0.0478061	0.0222919	0.0508434	0.0207049	-0.0669505	-0.0135251	-0.0925508	0.0307833	-0.0655458	-0.0303853	-0.0312335	-0.113975	-0.0353909	-0.0604474	-0.0349443	0.00344559	-0.0154151	-0.0146872	-0.00600218	0.0145626	-0.00930631	0.0118051	0.0470859	0.0418169	-0.031445	0.0601273	0.0440026	-0.0074667	0.0573908
028_Muscle_3	0.0450202	-0.0220415	0.0652331	-0.00929107	-0.0726908	-0.0835934	-0.00787204	0.00258526	-0.0185997	-0.0751907	-0.0342083	0.0333949	-0.00956619	-0.0204923	-0.0129433	0.0560443	-0.0904389	0.0201129	0.106159	0.0753451	0.0409446	-0.0613141	-0.00203178	-0.0808264	-0.0279892	0.0548564	-0.0103432	0.00896786	-0.00600175	-0.0817824	-0.00850101	0.0148571	0.0959012	-0.0239774	0.0961246	0.0197311	-0.0537309	-0.00676894	0.0188913	-0.0373106	0.099237	-0.0689528	-0.0340101	-0.0397136	0.00921181	-0.0384273	0.0350993	-0.0132064	0.0264477
029_Muscle_3	-0.0591948	0.0290691	-0.0335507	-0.0101016	-0.0181115	-0.00931337	0.0682943	0.0573734	-0.0444761	0.0221421	-0.00178164	-0.0182224	-0.0137559	0.0192412	0.0394064	0.00603172	-0.0567285	-0.0411751	0.00465987	0.0208407	-0.0281816	0.000476566	-0.0189557	0.0109103	0.0289114	0.0111371	0.0691484	-0.00588884	0.0444959	-0.020531	0.0490829	0.0395377	-0.0241209	0.00433183	-0.0255541	-0.00612518	-0.0411063	-0.0194125	-0.0112356	-0.0168662	-0.0346316	-0.019625	0.0167445	-0.00246952	0.0203659	-0.016141	0.0158094	0.021138	-0.0151326
030_Muscle_3	0.00512432	-0.073758	-0.00179548	-0.0966557	-0.0368586	-0.0843849	-0.0273116	0.00143674	-0.0197609	-0.0108522	0.00478587	0.029993	-0.00876813	-0.125214	-0.0452035	0.0863631	-0.0155207	0.0392533	0.0784759	0.040621	0.0746663	-0.0825406	0.0605223	0.0299618	0.0204963	-0.0191162	0.0298396	0.0630141	0.0863274	-0.0563257	0.0186477	0.0333282	0.0178679	-0.0518706	0.0340641	0.00406414	-0.0128515	-0.0375639	-0.0640296	-0.058616	-0.0258215	-0.127705	-0.0224614	0.0403141	0.0143867	-0.00258583	-0.0674865	0.0568976	0.0785626
031_Muscle_3	-0.0286532	0.0262794	0.0553702	0.0482297	-0.0152146	0.0134535	-0.0231521	-0.0319089	0.00404119	0.0225581	-0.00901092	-0.0335907	-0.00808576	0.0342422	0.0241241	0.0265984	0.0754131	-0.0305861	-0.0528536	-0.0482916	-0.0509839	0.0665951	-0.0589964	-0.0269081	0.0609299	0.0104335	0.0354482	-0.0236002	-0.0832665	0.0421189	0.054532	-0.0529267	-0.0148513	0.0706965	-0.00897804	-0.00539451	-0.0294867	-0.0154934	-0.0171832	-0.0463229	-0.0449915	-0.0248858	-0.0237073	0.00571329	0.0146797	0.0436564	0.0353445	0.0241273	-0.0221705
032_Muscle_3	0.0270165	0.00831928	0.00829637	-0.011753	-0.0332706	-0.0626516	-0.0250698	0.00767548	-0.014792	-0.00514628	0.0222128	0.000416194	-0.0336709	-0.0909243	-0.0467333	-0.00103608	-0.0466517	0.0351096	0.0592653	0.0360774	0.0645073	-0.0110813	0.0165392	-0.0214704	-0.0123098	-0.0150794	0.0167476	0.0219829	0.0221046	-0.0334514	0.0167926	0.0333725	0.0142487	-0.04039	0.0286367	0.000597162	-0.0117611	-0.00107289	-0.0346904	-0.013058	0.0233499	-0.042222	-0.0342188	-0.0123363	-0.0265485	-0.0221859	-0.0546134	0.00220225	0.0319204
033_Muscle_3	-0.0537117	-0.00545672	0.0129243	0.0413348	0.0541345	0.0410862	-0.0228528	-0.00330812	0.0187956	0.0640217	0.00200188	-0.0346448	0.0130383	0.0167979	-0.00357481	0.0419418	0.0746306	-0.011012	-0.0928716	-0.0435217	-0.030117	0.0503292	-0.034064	0.0198834	0.0240611	-0.0257706	0.0607218	-0.0370433	-0.0344741	0.0474867	0.0869767	-0.0573468	-0.0733452	0.0497254	-0.0663211	0.00390347	-0.0198606	-0.00358846	-0.0338123	0.000348154	-0.0685194	0.00393792	0.00435567	0.0415081	0.03553	0.0565589	0.0210836	0.0373515	-0.0215245
034_Muscle_3	-0.00979376	0.0116435	-0.0228985	0.0264347	0.0584354	0.0371583	-0.00376607	-0.0166299	-0.0123743	0.0534373	-0.00349913	-0.0371607	0.00362511	0.0251599	0.0228729	-0.0445379	0.0161658	-0.034769	-0.0360244	-0.0488203	-0.0279812	0.0264062	-0.0236104	0.030385	0.0157341	-0.0840735	0.0543817	-0.0341981	0.00136811	0.047369	0.053058	-0.048703	-0.0439675	0.0580591	-0.036097	0.0022092	0.0231404	0.0278771	-0.00347257	0.0122907	-0.0825949	0.0288534	-0.0154011	0.0536317	0.0212831	0.0508331	-0.0383899	-0.0136188	-0.0348196
035_Muscle_3	-0.0115562	-0.012739	0.043516	-0.00717491	-0.0239954	0.0276322	-0.0378531	-0.0397764	-0.00256098	-0.0400966	-0.000193515	-0.0105192	-0.0479332	0.00482221	-0.0221094	0.0640133	0.0444512	0.0360467	-0.0481874	-0.0613041	-0.0291067	0.0508976	-0.00341659	-0.00499525	-0.0212908	0.0184124	-0.00503693	0.0391274	-0.0562022	0.013189	0.00715551	-0.017379	0.050704	0.0643988	0.0122076	0.0303825	0.0339188	-0.00385648	-0.0143721	-0.0223467	-0.0397271	-0.0219512	-0.0147756	-0.0281236	-0.0481557	0.00415112	0.0104252	-0.0212369	-0.0327333
036_Muscle_3	-0.000210746	0.0675559	-0.0223536	0.017182	0.0491312	0.0103793	0.00575168	0.0312065	-0.0614382	-0.0591582	-0.0183015	-0.03342	-0.0292442	0.0142887	-0.0299395	-0.0724239	0.0087091	-0.113711	-0.0612616	-0.0381379	-0.0657475	-0.0137371	-0.0275417	-0.000601412	0.0337614	-0.0118038	0.0779823	0.0151428	0.016075	0.0171273	0.0258251	0.0428081	0.0392632	0.0748348	0.0169831	0.0289578	0.0679508	-0.024151	-0.00337099	-0.00369731	-0.0274472	-0.00372227	-0.0360273	-0.0251241	0.0183828	-0.0184668	-0.0737268	-0.0367357	-0.0165758
037_Muscle_3	-0.0201633	0.0142316	-0.0516274	0.0299117	-0.00611368	0.0531419	0.0204713	0.0313862	-0.0483856	-0.0683764	-0.0644446	-0.0360223	-0.0570735	0.0159884	0.0118838	-0.0685899	-0.0443278	-0.107243	-0.0243509	-0.0130232	-0.0688927	-0.0186993	-0.0333284	0.0297928	0.00411952	0.048184	0.021317	-0.00619393	0.0734576	0.0418416	-0.0162814	0.13727	0.0607904	0.0537734	0.0625228	0.000141724	0.0909705	-0.000171488	-0.0100789	0.000756491	-0.00215899	0.0473332	-0.0562183	-0.0781837	-0.0240594	-0.0604327	-0.0302481	-0.0935609	-0.0258944
038_Muscle_3	-0.012361	0.0391656	-0.0132829	0.0076194	-0.00419213	0.00530257	-0.0211147	0.012741	-0.0389685	-0.0552242	-0.0162672	-0.0445744	-0.0187459	0.0157281	0.00031813	-0.0323779	0.0243107	-0.0934835	-0.0257506	-0.0384786	-0.0396414	-0.00908194	-0.014602	-0.000386341	-0.0139609	0.0185964	0.0191934	0.0116063	0.00197513	0.0209529	-0.0269	0.0857509	0.0433521	0.0674232	0.0439956	0.0514474	0.0655801	-0.00828996	-0.000116697	-0.0272645	-0.0550281	-0.010352	-0.0175167	-0.0485238	-0.0480219	-0.00989064	-0.0581579	-0.0401234	-0.0518539
039_Muscle_3	0.0301263	0.05021	0.0197565	0.0773645	0.00568335	0.0310094	-0.0571181	-0.0961232	-0.00514881	-0.0576577	-0.0415538	-0.0330806	-0.0366411	0.0892707	0.0063485	-0.0921223	0.013082	-0.00979708	-0.082193	-0.0440073	-0.0878171	0.0539775	-0.0324729	-0.0254765	-0.000335592	0.0553922	-0.0175258	-0.0158709	-0.113857	0.0781445	-0.0034349	-0.0450555	0.0546087	0.118312	0.0482379	0.0319145	0.0675887	0.0112399	0.013961	0.0181158	-0.0169922	0.0673415	-0.0215163	-0.0759588	-0.0288408	-0.0156463	0.0195839	-0.0776773	-0.0607403
040_Muscle_3	0.0185132	0.0283113	0.0187041	-0.00541854	-0.00154797	0.0123147	-0.0491923	-0.068667	-0.0061515	-0.0153247	-0.0467137	-0.0297285	-0.0153159	-0.0108176	-0.0188142	-0.067984	0.0253704	0.00531061	-0.0149897	-0.0214957	-0.0451807	0.0397514	-0.00792854	-0.00285585	0.00764554	-0.00894982	0.0555007	0.000989888	-0.0619648	0.0297823	0.0354777	0.0263742	0.0140374	0.0438886	0.0350176	0.00942304	0.0367538	0.000757573	0.00287127	0.00410595	-0.0517637	0.00486762	-0.0167251	-0.0409661	-0.0224393	-0.0147883	-0.0218167	-0.046311	-0.0217001
041_Muscle_3	0.0326705	-0.0250066	0.0157881	-0.0485688	-0.0507839	-0.0691861	-0.0603524	-0.0304165	-0.0146139	-0.0585722	-0.0376246	0.0180986	-0.0447266	-0.130043	-0.0624621	0.0423278	-0.0504156	0.0708921	0.0815414	0.00933585	0.0830079	-0.06323	0.0420685	0.0108418	0.00799858	-0.00882849	-0.0121928	0.0518635	0.0612281	-0.0465388	-0.00366998	0.0603578	0.0774737	-0.0119098	0.0873622	0.0143524	0.00862279	-0.0215598	-0.0805644	-0.0725443	-0.0298535	-0.115585	-0.0619959	-0.0256173	-0.0380078	-0.0433855	-0.040508	-0.0153131	0.0256381
042_Muscle_3	-0.0326947	-0.0293605	-0.0333856	-0.0422688	0.00743104	-0.0691747	-0.0203865	0.0131701	-0.00798092	-0.00219628	0.00303445	-0.00271776	-0.0460306	-0.0646504	-0.0284018	-0.0517302	-0.037632	0.000876147	0.0489767	0.0275346	0.03172	-0.0351372	0.0252028	0.0203812	0.00244215	-0.0531525	0.0584185	0.0154437	0.038671	0.0265174	0.0372926	0.054923	0.0032163	0.00258355	0.0273146	0.0327853	0.016168	-0.0116214	-0.0389846	-0.0340243	-0.0175516	-0.0525076	-0.0110564	0.0115302	-0.0246505	-0.0322054	-0.0537155	-0.0178937	0.0161818
043_Muscle_3	0.00838174	0.00424336	0.00775347	-0.033871	-0.0144517	-0.00881876	-0.0334263	-0.0245772	-0.0481781	-0.0589143	-0.0511273	-0.034403	-0.0576302	-0.0441074	-0.0791218	-0.0323411	-0.027057	-0.0474895	-0.0128138	0.0179047	-0.0486362	-0.0273262	-0.0206448	-0.01044	0.0220998	0.0178461	0.0623809	0.0375587	0.0296476	0.0371578	0.0385537	0.113412	0.0582184	0.0612262	0.0687161	0.020522	0.0629362	0.0204988	-0.0196031	-0.0250647	-0.0471042	-0.0492038	-0.0503896	-0.0402335	-0.0111855	-0.0577554	-0.0733983	-0.0347414	-0.0364845
044_Muscle_3	0.0415304	0.0197355	-0.00278923	-0.0410215	-0.0324829	-0.0673865	-0.050124	-0.0145656	-0.035913	-0.0662598	-0.0430257	-0.00895418	-0.0462088	-0.0741511	-0.0485849	0.00708263	-0.0489675	-0.0250565	0.0293621	0.0157523	-0.000309425	-0.037473	0.0265814	-0.0222182	-0.000121139	0.0163903	0.0141151	0.0331021	0.0216688	-0.00621764	-0.0216098	0.1067	0.109856	0.043672	0.0910953	0.0173369	0.0442801	-0.0287348	-0.028956	-0.0440961	-0.0155066	-0.0874523	-0.060314	-0.0745156	-0.0377812	-0.0464812	-0.042473	-0.0301681	-0.0355424
045_Muscle_3	-0.0417979	0.0298938	-0.00677136	0.00740571	0.0138057	-0.0174401	-0.0237883	-0.0174796	-0.0588967	-0.047557	-0.035123	-0.0502061	-0.0403493	-0.0408598	-0.0374153	-0.0473188	0.0143912	-0.0894223	-0.0425707	-0.0249165	-0.0800517	0.0336727	-0.00422641	0.0358348	0.0206183	0.0121251	0.0363123	0.0253673	-0.0217326	0.0705786	0.0177117	0.0761827	0.0600353	0.0650177	0.0699584	0.0250486	0.0945687	0.0165533	-0.0402935	-0.0645109	-0.069653	-0.0265505	-0.0550947	-0.0619174	-0.0364657	-0.0268242	-0.020908	-0.0414672	-0.0555838
046_Muscle_3	0.015104	0.0149045	0.0132922	0.00772166	-0.0352275	-0.0540538	-0.0312786	-0.00850123	-0.0479166	-0.0674944	-0.0377443	-0.0479315	-0.0581607	-0.0361051	-0.00839396	-0.0743392	-0.082534	-0.0537272	0.0267903	0.0189043	-0.0332054	0.00145118	0.00802777	-0.00908112	0.00660477	0.0256826	0.0327018	0.0100331	-0.017657	0.00529955	0.00806725	0.0596262	0.0967626	0.0719066	0.131749	0.0449712	0.016557	-0.0247034	-0.021534	0.00430701	-0.00301144	-0.0222382	-0.0466698	-0.0596238	-0.0490419	-0.100867	-0.0343787	-0.080363	-0.000550461
001_Muscle_4	-0.00458487	0.0279413	0.0538654	0.0666447	-0.00060335	-0.026983	-0.0163424	-0.00369622	-0.0244958	-0.0353093	-0.0239591	-0.0175235	-0.0230609	0.0265908	0.0293842	-0.00695087	-0.0322469	-0.0261041	-0.0242297	0.0109222	-0.0536356	0.0352413	-0.0194762	-0.0243236	0.0209561	0.00715158	0.0410877	-0.0380169	-0.0516313	0.016142	0.0234212	-0.0298715	0.00652324	0.0484859	0.037404	0.0126059	-0.0152517	-0.00432063	0.00895576	-0.00874741	0.00886075	-0.00409841	-0.0345116	-0.0367922	0.0242091	-0.00787979	0.0218476	-0.000940874	-0.0339851
002_Muscle_4	0.0122502	0.0657861	0.0621887	0.0763307	0.0165786	0.0248761	-0.00773714	-0.0169762	0.0267607	-0.0154734	-0.0313342	-0.017879	0.0165575	0.064306	-0.000299255	-0.0407118	0.00321187	-0.0313165	-0.0463853	-0.0373195	-0.0659009	0.0828248	-0.0441717	-0.0176717	-0.0289089	0.0218172	-0.0286202	-0.0444203	-0.103552	0.0243106	-0.00228548	-0.0799173	0.0256068	0.0917468	0.00247556	0.00516833	0.00228186	0.00885993	0.0335435	-0.012136	0.0281882	0.0575882	-0.0129107	-0.0344874	-0.0342028	0.0152218	0.0372948	-0.010168	-0.0592106
003_Muscle_4	0.0136119	0.0527127	0.0785057	0.0784395	0.0456063	0.0676088	-0.0225331	-0.0335965	0.0361893	-0.00712235	-0.018177	0.0181237	0.0339641	0.10672	0.0273401	0.0177312	0.0506026	0.023138	-0.0660743	-0.0408913	-0.0772109	0.0674231	0.00251486	-0.0477697	-0.0379848	0.0124702	-0.0827923	-0.0494473	-0.126882	0.0227982	0.00764394	-0.132203	-0.00940065	0.0409208	-0.0485266	0.0194016	-0.0365084	0.0227025	0.0747571	0.0529585	0.0233145	0.0990023	0.0463911	0.0104377	0.0167049	0.0784558	0.0757678	0.00333309	-0.02063
004_Muscle_4	0.00626101	0.0420426	-0.00453625	0.0665974	0.0761791	0.101243	0.017213	0.0302221	0.0606505	0.0389678	-0.00149757	-0.0106922	0.027963	0.0951144	0.0572051	-0.0146168	0.040702	-0.043011	-0.0702216	-0.0651999	-0.06824	0.0526673	-0.0134885	0.017704	-0.0148941	-0.0130091	-0.069677	-0.0622469	-0.0248873	0.011423	-0.0410157	-0.0364703	-0.0337876	-0.0194714	-0.0790476	-0.0161749	0.0278812	0.0166456	0.085537	0.0704791	0.0222448	0.148241	0.0544165	0.014402	0.0329931	0.0360893	0.0283185	0.0163401	-0.013257
005_Muscle_4	-0.0398314	0.0215553	-0.0477022	0.0247711	0.106079	0.113174	0.0660047	0.0484831	0.0910846	0.106778	0.04212	0.00754807	0.0523376	0.0771895	0.0345406	-0.019423	0.0715747	-0.0109931	-0.0963072	-0.0612523	-0.0274043	0.0213879	-0.0180259	0.0865702	-0.0163003	-0.0209909	-0.0426603	-0.0392416	0.0147079	0.0363422	-0.0515131	-0.0425877	-0.102148	-0.0318344	-0.152007	-0.055884	-0.00156724	0.0222032	0.0499955	0.0610714	-0.0257527	0.109878	0.051753	0.0622924	0.0297117	0.0543335	0.0477413	0.0303141	-0.0144118
006_Muscle_4	-0.0137925	0.0484404	-0.0564398	0.0538717	0.072705	0.134321	0.0247524	-0.0319854	0.0421531	0.0948661	0.0484108	0.0375574	0.0287767	0.16106	0.0524877	-0.0977221	0.0351735	-0.00735218	-0.0674626	-0.0533413	-0.0396145	0.0793866	-0.0352019	-0.00416567	6.44886e-05	-0.0670563	-0.0326233	-0.0331863	-0.0569463	0.0628304	0.00995051	-0.111269	-0.108213	-0.00143878	-0.103773	-0.0476029	-0.00241994	0.0199853	0.0657046	0.0999472	-0.0119278	0.167268	0.0666571	0.0314022	0.0401097	0.0349646	0.0055683	-0.0484143	-0.0118137
007_Muscle_4	-0.0415836	0.0319367	-0.0585915	0.0237654	0.0108762	0.0976067	0.0705763	0.0774673	0.0434993	0.0732327	0.0212813	-0.0181146	0.0176189	0.129341	0.102505	-0.054487	-0.00449509	-0.0643251	-0.0680328	-0.0311619	-0.0514985	0.0450006	-0.0383994	0.0612026	-0.016736	0.01962	-0.0151675	-0.0238938	0.0144826	0.0365304	-0.0587167	0.00827504	-0.0419547	-0.0213164	-0.0746892	-0.0369218	-0.0295465	0.0382731	0.0434387	0.0192195	0.026233	0.12191	0.0419216	0.00178396	0.0394605	-0.0180931	0.0118596	0.00838054	-0.0429019
008_Muscle_4	0.0488831	-0.0166118	0.0474002	-0.0313194	-0.051319	-0.0127344	0.0475022	0.0562812	-0.0281632	-0.0749978	-0.0194432	0.0268149	-0.0215555	-0.00283459	-0.0198031	0.0356229	-0.0950031	-0.00480455	0.081686	0.0691684	0.00974411	-0.051615	0.0359344	-0.0595388	-0.0136659	0.0466716	-0.0413268	-0.0156971	0.0113868	-0.0959083	-0.011469	0.0430601	0.0320322	-0.00241737	0.0696282	0.00694123	-0.0584351	-0.0283561	0.0435548	-0.0173151	0.095419	-0.0455687	-0.0213852	-0.0568531	0.0247632	-0.0606138	0.0114933	0.00202842	0.017208
009_Muscle_4	0.0208499	-0.00406423	-0.00760985	0.020476	-0.0222739	0.0139514	0.0428955	0.0404305	0.00712515	-0.0313031	0.00398149	-0.000595543	0.0333891	0.0484327	0.0480468	0.0286567	0.00982903	-0.0171959	0.0316208	0.0157434	-0.00448266	0.00355166	-0.00961963	0.00600078	-0.0350245	0.0221118	-0.0483949	-0.0137138	-0.0163328	-0.035461	-0.0370715	-0.0175666	0.0118514	-0.00304551	-0.00973105	-0.030904	-0.0353582	-0.00511345	0.036034	0.0251363	0.0486735	0.0305924	0.0284694	-0.0262274	0.0178558	0.0114889	0.0444358	0.0115151	-0.0275081
010_Muscle_4	0.0309464	-0.0252429	0.0324395	-0.00969258	-0.0262144	-0.0232893	-0.0181415	0.00849456	-0.0080889	-0.000651754	-0.00990647	0.0251683	-0.00201167	-0.0334499	-0.000682133	0.0547149	0.00312172	0.0590468	0.0343148	0.0413324	0.0587262	-0.0179623	0.00637973	0.00698048	-0.00151311	-0.00464049	-0.0400458	0.00673533	0.0222122	-0.0362391	-0.0226507	0.00776965	0.0206096	-0.0714341	-0.018845	0.0026851	-0.0584691	0.0111679	0.00467848	-0.00894006	0.0256239	-0.0296933	-0.00296347	0.00150848	-0.0190263	-0.0151158	0.0571241	0.029621	0.0188015
011_Muscle_4	-0.00856013	-0.0151057	0.0276837	0.0364572	-0.0103548	-0.0173951	0.0540288	0.0176042	-0.044134	-0.0365855	0.00033035	0.0239928	-0.0167954	0.0121191	-0.000921453	0.0112209	-0.0319069	-0.0109492	0.054741	0.0412046	0.0025189	-0.0273225	-0.0245391	-0.00395235	0.00919164	0.0552936	0.0142835	-0.00396803	0.0771298	-0.0444342	-0.0204438	0.018067	0.00450507	-0.0250492	-0.00907948	-0.0119948	-0.0562557	-0.0137645	-0.011207	0.00291543	0.0257232	-0.0109266	-0.0077568	-0.0430228	0.040904	-0.0329452	0.00731	-0.0197676	0.0184406
012_Muscle_4	0.022376	-0.00125358	0.0295356	0.0486839	-0.060423	-0.0363994	0.0210032	0.000690522	-0.0228659	-0.0613059	-0.0227753	0.0288396	0.0113189	0.0287807	0.00422589	0.0232091	-0.0417374	-0.0201263	0.0315553	0.0239066	0.00973801	-0.00221795	0.0123301	-0.0416501	-0.017415	0.0698165	-0.0328171	0.00778252	0.00211921	-0.0254508	-0.0297195	-0.0015542	0.059441	-0.0100901	0.0213522	0.0186947	-0.0401927	-0.0228637	0.0177304	0.00849562	0.0924984	-0.0231251	-0.00628787	-0.0501894	-0.00102888	-0.023248	0.061651	-0.0104225	-0.00996852
013_Muscle_4	-0.0196806	-0.0615219	-0.0296682	-0.0946257	-0.00118023	-0.0222158	0.0107042	0.0304014	0.042168	0.0662508	0.0314713	0.0213662	0.0108108	-0.081169	-0.0136427	0.0761047	-0.00580042	0.0914833	0.0718882	0.0248545	0.0917353	-0.0802614	0.0715509	0.0289118	-0.0245425	-0.0429417	-0.00070732	0.0211793	0.115168	-0.0743321	-0.0456481	0.0504891	-0.0209592	-0.11413	-0.0113793	-0.031013	-0.0161834	0.00481355	-0.0548291	-0.0174584	0.00322619	-0.0489638	0.0134412	0.0459461	0.0182981	0.0296831	-0.0325421	0.0199613	0.0299083
014_Muscle_4	0.00998808	-0.024788	0.00823318	-0.0367746	-0.0119208	-0.0232945	-0.0118976	0.00162084	0.00562577	0.0484452	0.0315709	0.026384	-0.000589059	-0.0238061	-0.000972175	0.00731674	0.00636233	0.0408575	0.081482	0.00983887	0.0624132	-0.034551	0.0189802	0.00218253	-0.00487225	-0.0459833	0.0157167	0.0233322	0.00390578	-0.0470212	0.010198	-0.0583418	-0.0258443	-0.0728235	-0.0121779	-0.00181904	-0.0244366	-0.0111425	-0.0165224	-0.00750549	0.000711733	-0.0346031	-0.0140785	0.0352186	0.0171087	0.0412622	-0.00267871	0.0144403	0.0393836
015_Muscle_4	0.0150023	-0.00383776	0.0885813	0.0298915	-0.0574361	-0.0315617	0.00998299	-0.0119845	0.0267089	-0.04753	0.0132515	0.0419298	-0.00665431	0.00512533	0.00120684	0.0479784	-0.00265833	0.0643707	0.0509668	0.0481939	0.0272507	-0.00660834	-0.00918919	-0.0553429	-0.00788343	0.0326518	-0.0410197	-0.0167976	-0.00953862	-0.0730693	-0.0280514	-0.0356006	0.0336576	-0.0175734	-0.00125666	0.0104661	-0.0976595	0.00276672	0.0144134	-0.00948754	0.051165	0.0120159	-0.01915	-0.0173024	0.0193391	-0.0106542	0.0844654	0.0138807	0.0411416
016_Muscle_4	0.0203759	-0.00080772	-0.00767025	-0.0419298	-0.00744917	-0.00568861	0.00868656	0.00724871	0.0110138	0.00936898	0.012987	0.0173405	0.00602931	-0.0456072	-0.011176	-0.00249587	-0.026954	0.0533418	0.0183871	0.00185722	0.0781252	-0.0139095	0.0332033	0.0190443	-0.0160249	-0.0233364	-0.00409652	0.0149845	0.0320022	0.00875245	-0.016321	0.00564187	-0.025693	-0.0783656	-0.0340997	0.00479054	-0.0130787	-0.00741269	-0.0195021	-0.0048854	-0.00146789	-0.0211857	0.0254629	0.0310703	-0.0340709	-0.00527392	-0.011074	0.0166708	0.0622079
017_Muscle_4	-0.04216	-0.0245797	-0.0230522	-0.0630917	0.029197	-0.0129651	0.00952987	0.0384514	0.0329715	0.0731845	0.0333728	0.0122752	0.0331065	-0.0113963	0.0292278	0.0450622	0.021926	0.0293052	0.00982733	0.018378	0.0533643	-0.0281743	0.0382523	0.0133797	-0.0130984	-0.0589516	-0.0121419	-0.000413949	0.0604505	-0.0352624	-0.0230259	0.0299677	-0.0372678	-0.0818522	-0.064798	-0.0350321	0.00877491	-7.17599e-05	0.0139952	-0.0115172	0.0217632	0.0307605	0.0311348	0.0744669	-0.00186515	0.0206333	-0.0138473	0.0226221	0.024073
018_Muscle_4	-0.0091138	0.0249841	-0.0328934	0.0473887	0.00375134	0.00445706	0.0437676	0.0190107	0.00839666	0.0458665	0.0418987	0.00723885	0.0090036	0.0263289	0.0334061	-0.0547172	0.017243	-0.0555498	0.00326951	0.0145314	-0.016037	0.0396091	-0.017619	-0.0279134	0.0320713	-0.0128942	0.0250594	-0.0245913	-0.0354313	-0.00610522	0.0301736	-0.0509712	-0.0531226	-0.0163532	-0.0501015	0.0104941	-0.0441856	0.0273722	0.0255541	0.0254173	0.00559102	0.0252581	0.0450924	2.01559e-05	0.0611952	0.0107071	-0.00397099	0.0189595	-0.000963471
019_Muscle_4	-0.0101222	-0.0306086	-0.00828939	-0.0013635	0.00673087	0.0173269	0.016702	-0.0026818	0.0241017	0.0412736	0.0255431	0.0230315	0.072367	-0.0269073	-0.00122972	0.0902174	0.027221	0.0439256	2.15551e-05	-0.00302239	0.0358123	-0.070946	0.0242284	-0.000421225	-0.00425623	0.0152325	-0.0441525	-0.00583314	0.0582796	-0.0381004	-0.0468275	0.0154277	-0.0140827	-0.0689559	-0.0343162	-0.00542688	-0.0253872	0.00790085	-0.00614911	0.0291109	0.0539282	-0.0101827	0.00429497	0.0535204	-0.00055676	0.029546	0.0336996	-0.00987668	0.0114956
020_Muscle_4	0.0335513	0.0358933	-0.0741745	0.0145625	0.0102182	0.121157	0.0442334	0.00803006	0.00879298	0.0674395	0.0743028	0.0299323	0.0296208	0.111589	0.0211355	-0.0945586	-0.0233602	-0.0142878	-0.022865	-0.00991183	-0.0138162	0.0147111	-0.00122802	0.0108665	-0.0167562	-0.036434	-0.0270878	-0.0259149	-0.0162135	0.0268699	-0.0413902	-0.0578817	-0.0333642	-0.0368208	-0.0608367	-0.0593186	-8.72958e-05	0.0549792	0.0609707	0.0858659	0.0116606	0.147959	0.0548523	-0.0121948	-0.018664	-0.0133475	-0.0256363	-0.0313287	-0.0412598
021_Muscle_4	0.0149027	0.000927045	-0.0092352	-0.00630291	-0.0678763	0.0142379	0.0557867	0.0143642	-0.0277759	-0.0347141	-0.0255102	0.0306287	0.0054831	-0.00139286	0.00999624	0.0270117	-0.0570447	-0.033618	0.0304174	0.0370774	-0.00923671	-0.0423058	-0.0257632	0.0206957	0.00396836	0.0928854	-0.0169894	0.00386929	0.0701628	-0.0390148	-0.0560467	0.105933	0.0431848	-0.0357312	0.0312416	-0.0289462	-0.0287503	0.00738054	0.012816	-0.00639502	0.0575307	-0.010189	-0.00247464	-0.0464351	0.0124402	-0.0484534	0.0363625	-0.0582802	0.00700603
022_Muscle_4	-0.00217876	-0.00066214	0.0213964	0.0267046	-0.0328567	-0.0394835	0.0180996	-0.00660506	-0.0342561	-0.0541357	-0.00796803	-0.0147724	0.000482682	0.0056579	0.0121385	0.000370268	-0.0286701	-0.0312516	0.0358488	0.00937846	0.000685937	0.0144364	-0.0465605	-0.0291777	0.053733	0.00746542	0.0305484	0.00771407	-0.0418377	-0.019197	0.0794706	-0.016465	0.00502777	0.0282187	0.0166623	0.02179	-0.0410981	-0.0114737	0.0228505	-0.0237276	0.0304349	-0.0173829	-0.0209966	-0.033955	0.0262109	-0.0184412	0.0428086	0.027276	0.0270611
023_Muscle_4	0.014024	-0.0361267	0.0415979	-0.00512123	-0.00751043	0.0289045	-0.0339145	-0.0289025	0.0339499	0.0435767	0.024815	0.0222718	0.0292669	-0.00445458	-0.0107274	0.0797154	0.0571331	0.0979185	0.00532395	-0.0122835	0.00987957	0.0476863	0.00287612	-0.0299722	0.00728008	-0.00135997	-0.0568826	-0.0143488	-0.0205964	-0.0161316	-0.00121917	-0.118863	-0.0342724	-0.0369806	-0.0304154	-0.0196944	-0.0195314	-0.0340884	-0.0244294	0.0105268	-0.00267805	-0.0289435	0.0495448	0.0243943	0.0235711	0.0577897	0.0295176	0.0479038	0.0533084
024_Muscle_4	0.0319359	-0.0149563	-0.0117877	-0.0406094	0.051811	0.0350098	-0.0176747	-0.0558861	0.0624807	0.0416327	0.015522	0.0133007	0.0186834	0.0133021	0.00827835	-0.028084	0.0202765	0.0852694	-0.0238526	-0.0139754	0.0198003	0.0145956	0.0144377	0.0168627	-0.0160593	-0.0205199	-0.0205555	0.0132176	-0.0426921	-0.0127279	-0.00158918	-0.0517793	-0.00181071	-0.0407911	-0.0540967	-0.0246142	0.00442972	-0.00939623	-0.0089933	0.0211593	-0.017255	0.0402078	0.0409764	0.0289607	-0.00759142	0.0252937	0.00740204	0.000206415	0.00994502
025_Muscle_4	-0.00715218	-0.0475489	-0.0337607	-0.0514914	0.0331999	0.0211868	0.0082039	-0.00665167	0.0209153	0.0584813	0.0355682	0.0163974	0.0565744	0.0040117	0.0250262	0.0282916	0.0346799	0.0547812	-0.0202666	-0.038455	0.00255254	0.0475432	0.0239569	0.0140215	-0.0102976	-0.0501358	-0.0333131	0.0204508	-0.0371207	0.0175266	0.0145744	-0.0671885	-0.0414717	-0.0266749	-0.0449052	-0.00943157	0.010077	0.00237243	0.00244901	-0.0123242	-0.0349808	-0.0100891	0.0279029	0.0466409	-0.00818863	0.036687	-0.0205981	0.0281577	0.01782
026_Muscle_4	0.00140534	0.0441294	-0.0950361	-0.0257339	0.0562251	0.059595	0.0620365	0.0249406	-0.0161464	0.0594698	0.0216299	-0.0133661	0.0136761	0.0731312	0.0462897	-0.124965	-0.00284482	-0.0714377	-0.0610873	-0.0144302	-0.0363785	0.0183055	0.00189937	0.0657454	-0.0444638	-0.0509142	0.0350639	-0.0323614	0.0144513	0.0828835	-0.0114462	-0.00398695	-0.0502818	0.0270855	-0.0270198	-0.027613	0.0183044	0.0126156	0.0311436	0.0424378	-0.0103622	0.139996	0.045466	-0.0173785	0.01397	-0.012418	-0.0114468	-0.0466671	-0.0230705
027_Muscle_4	-0.0192418	0.0231512	0.0208545	0.0351367	0.0517036	0.0655978	-0.0309525	-0.0620329	0.0801687	0.0370857	0.00758987	-0.00296328	0.0259833	0.0796522	0.0266692	-0.00410856	0.101499	0.0850831	-0.102712	-0.0661377	-0.0464039	0.0771708	-0.0304845	-0.0167073	-0.0208615	0.0502655	-0.0338667	0.00892341	-0.120275	0.0464794	-0.0113281	-0.134364	-0.0216318	0.0406349	-0.0624038	-0.0343136	0.0179687	-0.00138014	0.0370163	0.0205721	-0.0416274	0.0647872	0.0394904	0.0288288	-0.0207445	0.0238116	0.0289055	0.0208299	-0.0236894
028_Muscle_4	0.012939	-0.0272708	-0.0326751	-0.05977	0.0220464	-0.0130892	-0.0203663	0.035542	0.0148901	0.0401119	0.021278	0.00348323	-0.00664226	-0.049239	-0.0119794	0.00833727	0.00150727	0.0155504	0.00955836	0.00412924	0.0367773	-0.027891	0.0499662	0.0031628	-0.00672351	-0.0475798	0.0287883	0.00509135	0.0550047	-0.0217856	0.00371166	0.0132048	-0.0106223	-0.03209	0.00839188	-0.00463292	-0.00571316	-0.0143611	-0.0484877	-0.037172	-0.0274841	-0.0482694	0.00371726	0.0214029	-0.0216781	0.0020052	-0.0613154	0.0100291	0.0145549
029_Muscle_4	0.00112797	-0.0187073	0.0220246	-0.0249372	0.00950246	-0.0296373	-0.045151	-0.0320577	0.032136	-0.0151729	-0.0271869	-0.00699209	0.0104211	-0.0363661	-0.00731327	0.0617409	0.034256	0.0513449	0.00947309	-0.0140788	0.0117648	-0.00695064	0.0389113	-0.00323731	-0.0342988	0.0526653	-0.0227154	0.0384515	-0.00262729	-0.0218439	-0.0146005	0.00921496	0.0171762	-0.0339824	0.0132673	-0.00743269	0.0249374	-0.0082644	-0.030684	-0.0179482	-0.00146336	-0.0620639	-0.0320246	0.00344076	-0.0209371	0.0272737	0.00840654	0.0222133	0.0459618
030_Muscle_4	-0.0242737	-0.0290665	0.0227372	-0.0429707	-0.0428918	-0.107026	-0.0585334	-0.0228833	-0.0219392	-0.0387183	0.0068234	0.00945102	-0.0110536	-0.0706401	-0.023856	0.0559074	-0.0261154	0.0372897	0.0439678	0.014434	0.0758357	-0.0301251	0.0313392	-0.0187482	-0.00416376	0.0213377	-0.0161326	0.040507	0.012905	-0.000680553	0.0110444	0.0136612	0.0697493	-0.0153889	0.0742749	0.0181357	0.0111611	0.0123298	-0.0325799	-0.0607318	0.00540812	-0.0671176	-0.0327519	0.00785141	-0.0009492	-0.0293329	-0.00921652	-0.032369	0.00756254
031_Muscle_4	-0.00913475	0.02063	-0.0313929	-0.025758	-0.0302034	-0.0630635	-0.0114832	0.0414826	-0.0485363	0.0240827	-0.00691093	-0.0265672	-0.0381027	-0.0443822	-0.0260732	-0.0167415	-0.0368273	-0.0707865	0.0145401	0.00599123	0.0146168	-0.0227817	-0.0118816	0.0106401	0.0831724	-0.0317847	0.0805881	-0.0027275	0.0523744	0.036021	0.0381191	0.0878887	-0.018325	0.0248177	0.0121414	-0.013221	0.0159629	-0.00761116	-0.0529028	-0.0239918	-0.0973204	-0.0798784	-0.0325828	0.0241217	0.0361624	0.00691077	-0.107583	0.00919678	-0.022198
032_Muscle_4	0.0170322	-0.0240567	0.00527868	-0.0566776	0.00914196	-0.0404342	-0.0553756	-0.016628	-0.035071	0.00391828	0.00740981	-0.00784937	-0.0471717	-0.047168	-0.0570689	0.00136645	0.014999	0.0319883	0.0327858	-0.0149258	0.0141777	-0.0370889	0.0286032	0.00256168	0.00935483	-0.050977	0.0125684	0.00818529	-0.0150409	0.0339972	0.0447507	-0.0580858	0.0361397	0.0353657	0.0389892	0.036202	0.038115	0.00258001	-0.0330636	-0.0274751	-0.0576511	-0.0268248	-0.040502	0.026642	-0.0506024	0.0276284	0.00467054	0.00224429	-0.00443528
033_Muscle_4	-0.0405002	-0.0109224	0.0324239	0.0491089	-0.0152913	-0.0021092	-0.0415445	-0.0396388	-0.0226254	-0.00440235	-0.0217543	-0.0567003	0.0143176	-0.0329954	-0.0080225	0.0265875	0.0587506	-0.0445425	-0.0316112	-0.0257904	-0.0549307	0.0370189	-0.0320065	-0.0018302	0.0633339	0.02354	0.0806738	0.00478255	-0.0597996	0.0305298	0.0599171	-0.00596982	-0.0292708	0.0708789	-0.0033696	0.0467437	0.00489789	-0.0192083	0.0025898	-0.0294428	-0.0692187	-0.0438126	0.00262633	-0.00117446	-0.000686229	0.0289578	0.0333238	0.0143864	-0.0397266
034_Muscle_4	-0.011708	0.0118723	-0.020688	-0.00812405	0.0280089	0.0146395	-0.0642471	-0.0576239	-0.0309798	-0.0415478	-0.0459358	-0.0144062	-0.00555289	-0.0322012	-0.0479316	-0.0496131	0.0245612	-0.0100737	-0.0249633	0.0134716	-0.00211537	0.0103387	0.0125317	0.0323194	0.0130869	0.00934427	-0.00170191	0.0582235	-0.0111977	0.0199902	-0.00701362	0.0457465	0.00230218	0.0345577	0.0266564	0.0316756	0.0552497	-0.0371274	-0.0264279	-0.024116	-0.0267682	-0.0254037	-0.00617481	-5.21958e-05	-0.0222924	-0.00210201	-0.0291421	0.00517261	0.0240511
035_Muscle_4	-0.0535786	-0.00187542	-0.0282919	0.0368343	-0.0301891	-0.0133363	0.0355756	0.0366527	-0.0599217	-0.0161662	-0.00770344	-0.0629537	-0.0527744	-0.0161793	0.0126006	0.000402059	0.0067581	-0.100701	-0.0181646	0.00447854	-0.0751262	-0.00791781	-0.0560973	0.0181005	0.0644004	0.0036632	0.102019	-0.0233489	0.0108814	0.0420817	0.100627	0.0882642	-0.0272971	0.0843607	0.0219869	-0.00271054	0.00930645	-0.00600347	-0.0394263	-0.0205639	-0.0572955	-0.0577989	-0.0484973	-0.0242474	0.0572695	-0.0379879	-0.0221069	0.00463446	-0.0538714
036_Muscle_4	-0.00437767	-0.0156977	-0.0539625	-0.0402491	0.0138099	-0.0266284	-0.0303531	0.0102113	-0.0385836	0.000663461	0.00393855	-0.0273768	-0.0129532	-0.0299838	-0.0344149	-0.03472	0.0137312	-0.0381521	-0.0248326	0.0057897	-0.00341192	-0.00601852	-0.011628	0.0429004	0.0460114	-0.0809007	0.0857522	0.0207752	0.0369197	0.0574497	0.0469249	0.0281624	-0.00412378	0.0480695	0.00316365	-0.00973064	0.0411436	0.00443441	-0.00280321	-0.00950253	-0.0490326	-0.0180112	-0.0115535	0.0437416	-0.0148629	0.0188228	-0.0417743	0.0281706	-0.0228345
037_Muscle_4	0.023256	-0.002104	0.0312848	0.0137482	-0.0594372	-0.066037	-0.0491939	-0.0561544	-0.0483565	-0.0979596	-0.0555948	-0.00675976	-0.0499092	-0.0291323	-0.0520974	0.0206339	-0.0263335	-0.0134397	-0.00433069	0.0423625	-0.0408027	0.0159488	-0.0183267	-0.0200354	0.0136601	0.0424919	-0.00496802	0.00340413	-0.0385324	0.00753769	0.0328103	0.0242244	0.119758	0.0834104	0.0959394	0.0363767	0.0390315	-0.0135719	-0.0382774	-0.0286737	-0.00248776	-0.0611832	-0.0642453	-0.047581	-0.0220858	-0.0298665	-0.00609769	-0.00704627	-0.0303872
038_Muscle_4	-0.0406576	0.0292726	-0.04609	-0.011041	0.0348851	-0.0133625	-0.0103205	-0.000635113	7.11229e-05	-0.00363695	0.0027111	-0.0438042	-0.0217544	-0.0465721	-0.0305009	-0.0575832	0.0288884	-0.0465968	-0.0135786	-0.00110078	-0.02684	0.00549576	0.0105534	-0.00803174	-0.00687343	-0.041734	0.0657903	-0.000977428	0.0213122	0.0286669	0.0406796	0.0458842	-0.00303218	0.046089	0.0235982	0.0147574	0.0565855	0.0185244	-0.00789781	0.0311608	-0.0591073	-0.0147553	-0.00529115	-0.00789457	-0.014412	0.0297155	-0.0435682	-0.0201431	-0.0139288
039_Muscle_4	-0.0207308	0.0095998	-0.0491667	0.00353821	-0.00489735	0.0129326	-0.0121435	-0.0122304	-0.0177344	-0.0285228	-0.0157086	-0.0298421	-0.0262647	-0.0289183	-0.0419222	-0.0530522	0.0115372	-0.0457879	-0.0574557	-0.00319501	-0.00745242	-0.0208689	-0.0250933	0.0282841	-0.0104428	0.00841196	0.0440992	0.0277216	0.0418722	0.0474226	-0.00867876	0.095979	0.0102213	0.0484692	0.0349455	0.0249635	0.0856888	-0.0185119	-0.0319019	-0.0292229	-0.0471752	-0.0079796	-0.0275529	-0.0161076	-0.0566878	-0.0268917	-0.0669291	-0.0394859	-0.0390304
040_Muscle_4	0.012421	-0.0029523	0.00698725	0.0142041	0.00600783	-0.0522484	-0.00223586	-0.00218238	-0.0531805	-0.110791	-0.0619126	-0.0527878	-0.0242351	-0.0217651	-0.0414181	-0.0441821	-0.050697	-0.0708743	-0.00266755	-0.0187756	-0.0279828	-0.0321676	0.000929483	-0.00300634	0.00312864	0.0456737	-0.00782269	0.0334456	-0.0306094	0.038714	0.00403604	0.105799	0.0678415	0.123521	0.114514	0.0442735	0.0462159	-0.0218273	-0.0294689	-0.0132641	-0.00570887	-0.0478141	-0.055365	-0.0491065	-0.0187887	-0.0720264	-0.0315752	-0.0612033	-0.0223433
041_Muscle_4	0.00110981	-0.00995653	0.0145405	-0.0173979	-0.00601168	0.00228021	-0.0198854	-0.0331747	-0.0191383	-0.0326666	-0.0178327	-0.0217989	-0.0353838	-0.0323441	-0.0280074	-0.00145272	0.0169528	-1.86912e-05	-0.0286704	-0.0145474	-0.037526	0.00388294	-0.0300255	0.0025739	0.0220343	0.00846831	-0.00197865	0.0273697	0.00166222	0.0246697	0.00425899	0.0470822	0.009116	0.0580539	0.0379864	0.0236914	0.0598325	-0.00667817	-0.0198445	-0.0172671	-0.0522012	-0.0264793	-0.0072679	-0.029491	-0.0180766	-0.0357788	-0.0369452	-0.030173	0.00894212
042_Muscle_4	0.0429937	0.0216962	0.0132059	0.0334176	-0.0170532	-0.00316622	-0.0111815	-0.0223543	-0.015664	-0.0394823	-0.0299533	0.0177627	-0.0512542	-0.0128691	-0.0125452	-0.0515404	-0.0640177	-0.0235734	0.0179544	-0.0160745	-0.0159522	0.00947668	0.00722311	-0.029835	-0.0167311	0.00674359	-0.00527489	-0.0141871	-0.0159474	-0.00451411	-0.017695	0.0285467	0.0397304	0.0380613	0.0749797	0.0189647	0.0508362	0.00239808	-0.0176224	0.0116774	0.0317458	-0.0143681	-0.00659293	-0.0558461	-0.0449873	-0.0538346	-0.0316589	-0.027658	-0.0118638
043_Muscle_4	-0.00141425	-0.000764375	0.0116638	-0.0253791	-0.0341286	-0.0402235	-0.0141857	-0.0101037	-0.0232542	-0.044395	-0.0303425	-0.00652519	-0.0152332	-0.0544521	-0.0293602	0.00807925	-0.0301591	-0.00710536	0.022624	0.023485	0.0204583	-0.0511181	-0.0107263	-0.00417793	-0.0250135	0.0425271	0.0232791	0.0253392	0.0337314	-0.0048465	-0.00795286	0.0526859	0.069166	0.00957882	0.0724849	0.0253505	0.0176175	0.0382361	-0.0143135	-0.0133901	0.00649623	-0.0255843	-0.0481649	-0.00105758	-0.0413082	-0.0270907	-0.0242284	-0.00760889	-0.00405719
[truncated: 122 more columns]

## Sheet: DEG
	Central_mean-zscore	Proximal-distal_mean-zscore	Mean z-score difference	p_value	adj_p_value
Mrpl15	-0.110428	0.0653364	-0.175764	0.242403	0.327303
Lypla1	-0.125668	0.0743534	-0.200021	0.194615	0.274311
Atp6v1h	-0.233241	0.138001	-0.371242	0.0129197	0.028381
Rb1cc1	-0.146371	0.0866026	-0.232973	0.121965	0.184276
Pcmtd1	0.00601094	-0.00355647	0.00956741	0.953058	0.964475
Vcpip1	-0.181515	0.107396	-0.288911	0.0519008	0.0901997
Cops5	0.133123	-0.0787645	0.211887	0.186984	0.264899
Arfgef1	-0.271468	0.160618	-0.432086	0.00212125	0.00615621
Sulf1	-0.214585	0.126963	-0.341549	0.0204778	0.0418606
Slco5a1	-0.183308	0.108457	-0.291764	0.0529144	0.0916742
Tram1	-0.168999	0.0999913	-0.268991	0.0775628	0.127017
Eya1	-0.277275	0.164055	-0.44133	0.00354463	0.00953909
Stau2	0.134421	-0.0795325	0.213954	0.187617	0.2657
Eloc	0.194033	-0.114803	0.308836	0.0509459	0.0887387
Tmem70	-0.0535472	0.0316821	-0.0852293	0.58311	0.660247
Jph1	-0.396249	0.234447	-0.630696	7.0499e-06	4.81475e-05
Sdhaf4	0.0844156	-0.0499459	0.134362	0.37345	0.463206
Dst	-0.309251	0.182973	-0.492224	0.000970119	0.00319211
Plekhb2	-0.2621	0.155076	-0.417176	0.00656816	0.0159883
Hs6st1	-0.344842	0.204031	-0.548873	4.53504e-05	0.000238972
Ankrd23	0.284485	-0.16832	0.452805	0.00307907	0.00845601
Cox5b	-0.0949842	0.056199	-0.151183	0.315069	0.405513
Actr1b	-0.490162	0.290012	-0.780174	3.87598e-08	5.98254e-07
Coa5	-0.407013	0.240816	-0.647829	5.94624e-05	0.000302845
Mrpl30	0.0143808	-0.00850864	0.0228895	0.880799	0.90766
Txndc9	-0.144027	0.0852159	-0.229243	0.151203	0.221475
Eif5b	-0.307083	0.181691	-0.488774	0.000445228	0.00165724
Cnot11	-0.100055	0.0591991	-0.159254	0.278801	0.366763
Map4k4	-0.259106	0.153304	-0.41241	0.00303821	0.00835561
Slc9a2	-0.334873	0.198133	-0.533006	0.00022935	0.000939151
Tmem182	-0.185781	0.10992	-0.295701	0.0425608	0.0765346
Tpp2	0.0205499	-0.0121587	0.0327086	0.832997	0.871058
Col3a1	-0.303485	0.179562	-0.483047	0.000608848	0.0021431
Col5a2	-0.24072	0.142426	-0.383146	0.0094915	0.021994
Cavin2	0.0632248	-0.037408	0.100633	0.512516	0.597371
Gls	-0.230787	0.136549	-0.367336	0.0154601	0.0329599
Ormdl1	-0.00923063	0.00546145	-0.0146921	0.9245	0.941751
Osgepl1	-0.020745	0.0122741	-0.0330191	0.829199	0.868332
Asnsd1	0.118318	-0.0700048	0.188323	0.249292	0.33486
Sf3b1	-0.306705	0.181467	-0.488171	0.000705466	0.00243467
Hspd1	-0.146081	0.0864312	-0.232512	0.102007	0.159518
Hspe1	0.102799	-0.060823	0.163622	0.281967	0.369928
Mob4	-0.393134	0.232605	-0.625739	4.091e-05	0.000218675
Maip1	-0.189643	0.112206	-0.301849	0.0325591	0.0615691
Bzw1	-0.145092	0.0858462	-0.230938	0.112198	0.17146
Clk1	-0.36672	0.216976	-0.583696	0.000155333	0.000684382
Ndufb3	0.178164	-0.105414	0.283578	0.0729075	0.120305
Cflar	-0.115481	0.0683265	-0.183808	0.230846	0.314871
Trak2	-0.286231	0.169353	-0.455584	0.00279418	0.00775584
Stradb	0.349179	-0.206598	0.555777	0.000288087	0.00114586
Fzd7	-0.114128	0.0675257	-0.181654	0.231671	0.315412
Sumo1	0.0161455	-0.00955277	0.0256983	0.866371	0.896068
Bmpr2	-0.215692	0.127618	-0.34331	0.0188151	0.0390151
Wdr12	0.0329627	-0.0195029	0.0524656	0.740929	0.796033
Raph1	-0.399511	0.236377	-0.635888	8.66227e-06	5.72476e-05
Ndufs1	0.286836	-0.169711	0.456547	0.00207148	0.00604336
Eef1b2	-0.0582328	0.0344544	-0.0926871	0.533722	0.615992
Zdbf2	-0.290815	0.172066	-0.462881	0.00145233	0.00442647
Klf7	-0.26452	0.156508	-0.421028	0.00441327	0.0114792
Creb1	-0.163117	0.0965108	-0.259628	0.0846763	0.136306
Idh1	-0.231102	0.136736	-0.367838	0.0100757	0.0231957
Acadl	-0.156369	0.0925181	-0.248887	0.104722	0.162861
Myl1	-0.170693	0.100994	-0.271687	0.0502968	0.0877259
Lancl1	-0.230729	0.136515	-0.367244	0.0112748	0.0255474
Fn1	-0.154249	0.0912642	-0.245514	0.0888691	0.141767
Pecr	-0.108421	0.0641489	-0.17257	0.292623	0.381716
Smarcal1	-0.259409	0.153484	-0.412893	0.00349721	0.00944417
Igfbp5	-0.823743	0.487381	-1.31112	2.24952e-26	4.37081e-23
Tns1	-0.706683	0.418121	-1.1248	9.31963e-16	9.53055e-14
Arpc2	-0.126026	0.0745652	-0.200591	0.161002	0.233513
Aamp	-0.291022	0.172188	-0.46321	0.00213483	0.00618177
Ctdsp1	-0.47841	0.283059	-0.761469	3.83355e-08	5.95887e-07
Cyp27a1	-0.277434	0.164148	-0.441582	0.00133416	0.00412454
Prkag3	-0.477076	0.28227	-0.759347	2.36097e-07	2.79717e-06
Tuba4a	-0.148889	0.0880927	-0.236982	0.1359	0.201953
Dnpep	-0.0555977	0.0328953	-0.0884931	0.548875	0.630111
Des	-0.659757	0.390356	-1.05011	5.27066e-13	2.80572e-11
Speg	-0.727093	0.430197	-1.15729	9.68591e-18	1.88197e-15
Gmppa	-0.119762	0.070859	-0.190621	0.200951	0.282116
Farsb	0.202595	-0.119869	0.322464	0.0424089	0.0763321
Serpine2	-0.148552	0.0878934	-0.236446	0.12929	0.193911
Cul3	-0.357259	0.211378	-0.568637	0.000372562	0.00142078
Irs1	-0.138139	0.0817321	-0.219871	0.155842	0.227328
Mff	0.00318839	-0.00188646	0.00507485	0.974126	0.979006
Pid1	-0.0774895	0.0458479	-0.123337	0.423567	0.512128
Trip12	-0.45207	0.267475	-0.719545	7.86341e-06	5.26848e-05
Sp100	-0.274985	0.162699	-0.437684	0.00141045	0.00431915
Cab39	-0.298406	0.176557	-0.474963	0.00125737	0.00393726
Psmd1	-0.40212	0.237921	-0.640041	3.18678e-06	2.4669e-05
Ncl	-0.226204	0.133837	-0.360041	0.0153563	0.0328062
Pde6d	-0.0917962	0.0543127	-0.146109	0.330425	0.421132
Eif4e2	-0.384088	0.227252	-0.611341	2.01549e-05	0.000119594
Atg16l1	-0.0438966	0.0259721	-0.0698687	0.636546	0.707071
Dgkd	-0.255894	0.151404	-0.407298	0.00558794	0.0140005
Hjurp	-0.311221	0.184139	-0.49536	0.00029671	0.00117295
Agap1	-0.338093	0.200039	-0.538132	0.000240542	0.000978792
Cops8	-0.125197	0.0740751	-0.199273	0.191388	0.270252
Col6a3	-0.394778	0.233577	-0.628355	1.00939e-05	6.53749e-05
Lrrfip1	-0.490665	0.29031	-0.780975	5.4463e-08	7.89713e-07
Ramp1	0.0429021	-0.0253838	0.0682859	0.674407	0.739905
Ube2f	-0.0265447	0.0157056	-0.0422503	0.776726	0.823788
Klhl30	-0.278424	0.164734	-0.443158	0.00258355	0.00726985
Ilkap	-0.180445	0.106763	-0.287208	0.0559304	0.0960077
Hdac4	-0.407298	0.240984	-0.648282	2.14675e-05	0.000125259
Ndufa10	-0.147721	0.0874016	-0.235123	0.13057	0.195603
Cops9	0.241872	-0.143108	0.384979	0.0216409	0.0438231
Gpc1	-0.642321	0.38004	-1.02236	2.8005e-13	1.62429e-11
Dusp28	0.0766138	-0.0453298	0.121944	0.436919	0.524274
Ppp1r7	-0.0966517	0.0571856	-0.153837	0.320927	0.411184
Hdlbp	-0.103475	0.0612229	-0.164698	0.282848	0.370813
Septin2	-0.13061	0.0772775	-0.207887	0.162346	0.235227
Fam174a	0.158472	-0.0937625	0.252234	0.0982988	0.154464
Pam	-0.0515869	0.0305223	-0.0821092	0.578781	0.656301
Tsn	-0.213074	0.126069	-0.339143	0.0131269	0.0287548
Tmem37	0.0409528	-0.0242304	0.0651832	0.68483	0.749226
Dbi	0.157831	-0.0933833	0.251214	0.104323	0.162485
Insig2	0.109761	-0.0649421	0.174703	0.258394	0.345177
Ddx18	-0.183256	0.108427	-0.291683	0.0519378	0.0902236
Actr3	-0.209526	0.12397	-0.333496	0.0212099	0.043085
Ccnt2	-0.244515	0.144671	-0.389186	0.00776975	0.0185121
Ubxn4	-0.384315	0.227386	-0.611701	1.05455e-05	6.79599e-05
Cd55	-0.0826104	0.0488778	-0.131488	0.390528	0.479639
Mapkapk2	-0.416959	0.246701	-0.66366	5.21766e-06	3.72717e-05
Srgap2	-0.180522	0.106809	-0.287331	0.0441823	0.0789594
Nucks1	-0.499015	0.29525	-0.794265	9.62105e-08	1.25883e-06
Rbbp5	-0.347197	0.205425	-0.552622	0.000212946	0.000887883
Snrpe	0.017822	-0.0105447	0.0283668	0.852358	0.884621
Zc3h11a	-0.275995	0.163297	-0.439293	0.0032742	0.00893199
Prelp	0.128842	-0.0762315	0.205074	0.209593	0.292137
Cyb5r1	-0.459609	0.271936	-0.731545	2.34193e-06	1.91998e-05
Adipor1	-0.466274	0.275879	-0.742152	3.93346e-07	4.37978e-06
Timm17a	0.0622089	-0.036807	0.0990159	0.515086	0.600187
Shisa4	-0.301185	0.178201	-0.479385	0.0016688	0.00502319
Nav1	-0.441279	0.26109	-0.702369	2.92981e-07	3.37841e-06
Phlda3	-0.256761	0.151917	-0.408677	0.00565767	0.0141387
Tnnt2	-0.35013	0.20716	-0.55729	0.000423886	0.00158692
Tmem9	0.0745139	-0.0440874	0.118601	0.483735	0.569462
Cacna1s	-0.5123	0.303111	-0.815411	2.45069e-08	4.00142e-07
Nek7	-0.219489	0.129864	-0.349353	0.0152926	0.0327061
Cdc73	-0.200454	0.118602	-0.319056	0.0414855	0.0748781
Glrx2	-0.184056	0.1089	-0.292955	0.056794	0.097097
Tpr	-0.0688562	0.0407399	-0.109596	0.485465	0.570462
Ivns1abp	-0.0875383	0.0517935	-0.139332	0.361821	0.45227
1700025G04Rik	-0.187897	0.111172	-0.299069	0.0443556	0.0792122
Arpc5	-0.143396	0.0848426	-0.228239	0.107959	0.165887
Smg7	-0.52001	0.307673	-0.827683	5.48774e-09	1.14039e-07
Lamc1	-0.357476	0.211507	-0.568983	8.53966e-05	0.000412238
Glul	-0.484843	0.286866	-0.771709	2.04013e-08	3.46198e-07
Xpr1	-0.456207	0.269922	-0.726129	1.64963e-06	1.44952e-05
Acbd6	-0.52611	0.311282	-0.837391	4.31547e-09	9.16388e-08
Qsox1	-0.385293	0.227965	-0.613257	8.45713e-06	5.59871e-05
Tor1aip1	-0.272365	0.161149	-0.433514	0.00215567	0.0062208
Tor1aip2	-0.0444139	0.0262782	-0.0706921	0.653591	0.721755
Csnk2a3	-0.114857	0.0679571	-0.182814	0.23359	0.316945
Fam20b	-0.158427	0.093736	-0.252163	0.0783684	0.128012
Cop1	-0.166293	0.0983902	-0.264684	0.105645	0.163467
Mrps14	0.169964	-0.100562	0.270526	0.106049	0.163794
Cacybp	0.0271668	-0.0160737	0.0432405	0.777366	0.824242
Gas5	-0.161052	0.0952891	-0.256341	0.0876214	0.140238
Prdx6	-0.197538	0.116876	-0.314414	0.0389329	0.0711299
Pigc	-0.197967	0.117131	-0.315098	0.0346575	0.0647184
Myoc	0.332732	-0.196866	0.529598	0.0010504	0.00340439
Prrx1	-0.256678	0.151868	-0.408546	0.00524777	0.0132679
Mettl11b	0.172776	-0.102226	0.275002	0.074648	0.12276
Kifap3	-0.0728716	0.0431157	-0.115987	0.458766	0.546357
Atp1b1	-0.173917	0.102901	-0.276818	0.07245	0.119805
Dpt	-0.131594	0.07786	-0.209454	0.1975	0.277973
Sft2d2	-0.467537	0.276626	-0.744163	2.30046e-08	3.82033e-07
Dcaf6	-0.329886	0.195183	-0.525069	0.000401881	0.00152213
Mpc2	0.192555	-0.113929	0.306484	0.0463657	0.0820479
Rcsd1	-0.405779	0.240086	-0.645865	2.12852e-05	0.000124383
Creg1	-0.223163	0.132038	-0.355201	0.0136573	0.0296991
Dusp27	-0.242442	0.143445	-0.385886	0.0102692	0.0235991
Uck2	0.0510034	-0.030177	0.0811804	0.59959	0.674386
Mgst3	0.371803	-0.219983	0.591786	0.000120196	0.000554069
Rxrg	-0.117834	0.0697186	-0.187553	0.224194	0.308177
Pbx1	-0.314045	0.18581	-0.499855	0.000420596	0.00157997
Rgs5	-0.172873	0.102283	-0.275157	0.0564032	0.0965556
Ddr2	-0.182486	0.107971	-0.290457	0.0477855	0.084177
Uhmk1	-0.250659	0.148307	-0.398966	0.00571608	0.0142568
Fcgr3	-0.119084	0.0704583	-0.189543	0.201928	0.282874
Sdhc	-0.141598	0.0837789	-0.225377	0.132514	0.197905
Mpz	-0.125086	0.0740091	-0.199095	0.185404	0.263334
Tomm40l	-0.156461	0.0925728	-0.249034	0.0967555	0.152285
Fcer1g	-0.11486	0.0679586	-0.182818	0.207967	0.290183
Ndufs2	0.0262071	-0.0155059	0.041713	0.785861	0.830981
Pfdn2	-0.342985	0.202933	-0.545917	0.000166485	0.00072286
Ncstn	-0.409708	0.242411	-0.652119	5.37681e-06	3.81979e-05
Copa	-0.316856	0.187473	-0.50433	0.000377602	0.00143859
Pex19	-0.0457377	0.0270615	-0.0727992	0.640087	0.709868
Dcaf8	-0.309953	0.183389	-0.493342	0.000936746	0.0030954
Pea15a	-0.398296	0.235658	-0.633955	7.38248e-06	5.00669e-05
Casq1	0.176328	-0.104327	0.280655	0.0631675	0.106448
Igsf8	-0.251316	0.148695	-0.400011	0.00814909	0.0193094
Atp1a2	-0.709276	0.419655	-1.12893	2.14158e-16	2.68458e-14
Tagln2	-0.185024	0.109473	-0.294497	0.0368434	0.0679514
Fh1	0.226557	-0.134046	0.360603	0.0192199	0.0397069
Cep170	-0.339426	0.200827	-0.540254	0.000204804	0.000857625
Zbtb18	-0.179015	0.105917	-0.284932	0.0548112	0.0944551
Adss	-0.217969	0.128965	-0.346935	0.0125705	0.0278025
Desi2	-0.217937	0.128946	-0.346883	0.0239149	0.0475482
Cox20	0.106542	-0.0630376	0.16958	0.27632	0.364487
Hnrnpu	-0.231428	0.136928	-0.368356	0.014352	0.0309451
Cnst	0.0678827	-0.0401639	0.108047	0.476345	0.562637
Sccpdh	-0.135352	0.080083	-0.215435	0.158904	0.231101
Coq8a	-0.113056	0.0668912	-0.179947	0.220894	0.304828
Psen2	-0.333017	0.197035	-0.530053	0.000143004	0.000638017
Itpkb	-0.234486	0.138737	-0.373223	0.0138424	0.0300319
H3f3a	-0.181688	0.107499	-0.289187	0.0547544	0.0944282
Pycr2	-0.0848362	0.0501948	-0.135031	0.380602	0.470575
Ephx1	-0.134305	0.0794641	-0.21377	0.155799	0.227328
Cnih4	0.0974717	-0.0576708	0.155142	0.315144	0.405513
Wdr26	-0.339057	0.200609	-0.539666	0.000240874	0.000979117
Lbr	-0.281796	0.166729	-0.448526	0.00338704	0.00917216
Enah	-0.248235	0.146873	-0.395108	0.0068709	0.016615
Srp9	0.00937603	-0.00554748	0.0149235	0.924544	0.941751
Degs1	-0.168593	0.0997506	-0.268343	0.0723035	0.119613
Fbxo28	-0.113764	0.0673104	-0.181075	0.197672	0.278115
Capn2	-0.272249	0.161081	-0.433329	0.00327572	0.00893199
Aida	-0.342439	0.20261	-0.545049	0.000130191	0.000592415
Mia3	-0.489628	0.289697	-0.779325	2.57946e-08	4.17657e-07
Dusp10	-0.317983	0.18814	-0.506124	0.000490409	0.00178272
Mtarc2	-0.135748	0.0803176	-0.216066	0.163435	0.236627
C130074G19Rik	-0.243015	0.143784	-0.386798	0.00732	0.0175698
Eprs	0.0727962	-0.0430711	0.115867	0.45734	0.544993
Tgfb2	-0.327595	0.193827	-0.521422	0.00040086	0.00151975
Pdcd5-ps	0.222318	-0.131538	0.353856	0.027479	0.0534986
Smyd2	-0.155796	0.0921795	-0.247976	0.104836	0.16292
Vash2	-0.389366	0.230375	-0.619741	4.31037e-06	3.17963e-05
Nenf	-0.189014	0.111834	-0.300848	0.0517969	0.0900594
Ppp2r5a	-0.363679	0.215177	-0.578855	5.63617e-05	0.000288947
Lpgat1	-0.0842752	0.0498628	-0.134138	0.388525	0.477636
Gstp-ps	0.0026378	-0.0015607	0.0041985	0.977739	0.981781
Cd34	-0.124952	0.0739298	-0.198882	0.188178	0.2663
Cr1l	-0.137676	0.0814585	-0.219135	0.145932	0.214644
Ppp1r14c	-0.206995	0.122472	-0.329466	0.0333443	0.0628703
Akap12	-0.149088	0.0882106	-0.237299	0.104275	0.162475
Armt1	-0.167284	0.0989766	-0.266261	0.085254	0.137069
Esr1	-0.260855	0.154339	-0.415194	0.00726641	0.017476
Pcmt1	0.0733334	-0.0433889	0.116722	0.442385	0.529934
Katna1	-0.286161	0.169312	-0.455473	0.000875235	0.00291196
Ginm1	0.0108825	-0.00643881	0.0173213	0.907808	0.928109
Tab2	-0.188129	0.111309	-0.299438	0.0464539	0.0820555
Epm2a	-0.08768	0.0518774	-0.139557	0.379886	0.46999
Utrn	-0.172434	0.102023	-0.274458	0.0743322	0.122445
Sf3b5	-0.172277	0.101931	-0.274207	0.0646882	0.108634
Phactr2	-0.330949	0.195812	-0.526761	0.000252123	0.00101845
Aig1	-0.134611	0.0796449	-0.214256	0.157593	0.229452
Hivep2	-0.207979	0.123054	-0.331034	0.0283428	0.0548257
Txlnb	-0.00704241	0.00416676	-0.0112092	0.945721	0.959048
Ifngr1	-0.163448	0.0967068	-0.260155	0.0899371	0.143236
Bclaf1	-0.374262	0.221438	-0.5957	4.52653e-05	0.000238972
Hbs1l	-0.653575	0.386699	-1.04027	4.29808e-15	3.71163e-13
Sgk1	-0.196707	0.116385	-0.313092	0.0344436	0.0644472
Tbpl1	-0.200736	0.118769	-0.319504	0.0411678	0.0743737
Stx7	-0.211814	0.125324	-0.337138	0.0211206	0.0429563
Epb41l2	-0.24569	0.145367	-0.391057	0.00649509	0.0158542
L3mbtl3	-0.147927	0.0875235	-0.23545	0.109684	0.168339
Lama2	-0.070031	0.041435	-0.111466	0.475424	0.561961
9330159F19Rik	0.219227	-0.129709	0.348936	0.0274154	0.0534284
Echdc1	-0.0178578	0.0105659	-0.0284237	0.855882	0.887158
Tpd52l1	0.0934945	-0.0553176	0.148812	0.329108	0.419866
Trdn	-0.161336	0.095457	-0.256793	0.0709153	0.117852
Rwdd1	0.0363074	-0.0214819	0.0577893	0.726885	0.78485
Amd2	-0.447329	0.26467	-0.711999	1.89708e-06	1.6238e-05
Hdac2	-0.0677083	0.0400608	-0.107769	0.476513	0.562665
Marcks	-0.239763	0.14186	-0.381622	0.0119523	0.0267241
Fyn	-0.325963	0.192862	-0.518825	0.000208765	0.000873115
Rpf2	0.113935	-0.0674113	0.181346	0.250085	0.335693
Gtf3c6	0.0153982	-0.0091106	0.0245088	0.868195	0.897289
Amd1	-0.372018	0.220111	-0.592129	0.000190266	0.000813392
Cdk19	-0.149547	0.0884821	-0.238029	0.106361	0.16408
Cd164	-0.359965	0.212979	-0.572944	0.000158008	0.000693808
Foxo3	-0.409871	0.242507	-0.652379	2.34878e-06	1.92155e-05
Snx3	-0.14964	0.0885367	-0.238176	0.121397	0.183559
Sec63	-0.073246	0.0433372	-0.116583	0.42544	0.513914
Sobp	-0.386064	0.228421	-0.614485	3.42118e-05	0.000188044
Mtres1	0.156667	-0.0926944	0.249361	0.0978891	0.153945
Cd24a	0.387213	-0.229101	0.616314	3.51296e-05	0.000192002
Qrsl1	0.117059	-0.0692601	0.186319	0.241061	0.326058
Rtn4ip1	-0.187601	0.110997	-0.298598	0.0405393	0.0734775
Atg5	0.262382	-0.155243	0.417625	0.00985574	0.0227296
Popdc3	-0.160139	0.0947489	-0.254888	0.0979443	0.153969
Bves	-0.017177	0.010163	-0.02734	0.85711	0.888194
Gpx4-ps2	-0.0565426	0.0334544	-0.089997	0.55576	0.634828
Vgll2	-0.293485	0.173646	-0.467131	0.00242987	0.0069024
Nus1	-0.263948	0.156169	-0.420117	0.00464438	0.0119721
Asf1a	0.124831	-0.0738582	0.198689	0.227208	0.311383
Hsf2	-0.261012	0.154432	-0.415443	0.00394381	0.010454
Serinc1	0.145284	-0.0859598	0.231244	0.138314	0.20507
Smpdl3a	0.0875167	-0.0517807	0.139297	0.352788	0.442808
Gcc2	-0.0437821	0.0259044	-0.0696864	0.652465	0.721126
Lims1	-0.183179	0.108381	-0.29156	0.0437491	0.0783091
Ranbp2	-0.229062	0.135528	-0.36459	0.0126928	0.0279616
Micu1	-0.44394	0.262664	-0.706604	1.29823e-06	1.19266e-05
Anapc16	0.0761687	-0.0450665	0.121235	0.432334	0.520301
Ascc1	-0.126551	0.0748759	-0.201427	0.203972	0.285223
Psap	-0.647779	0.383269	-1.03105	2.35874e-15	2.18239e-13
Vsir	-0.274573	0.162455	-0.437028	0.00184593	0.00549676
Eif4ebp2	-0.482783	0.285647	-0.76843	6.1715e-08	8.72088e-07
Lrrc20	-0.273268	0.161684	-0.434952	0.0040962	0.0107991
Sar1a	0.074221	-0.0439141	0.118135	0.434029	0.521855
Tysnd1	-0.0117041	0.00692492	-0.018629	0.907769	0.928109
Vps26a	-0.103762	0.0613923	-0.165154	0.272362	0.36049
Srgn	0.152132	-0.0900116	0.242144	0.116651	0.177281
Kifbp	-0.0792006	0.0468604	-0.126061	0.423421	0.512112
Ddx50	-0.0464303	0.0274713	-0.0739016	0.612434	0.685416
Hnrnph3	-0.199442	0.118003	-0.317445	0.0248521	0.0490978
Mypn	-0.606686	0.358956	-0.965642	1.27716e-11	5.06435e-10
Herc4	-0.222998	0.131941	-0.354939	0.0180494	0.0375884
Dnajc12	-0.221559	0.131089	-0.352647	0.0232716	0.0465672
Reep3	-0.05409	0.0320032	-0.0860932	0.556551	0.635358
Ado	-0.272792	0.161402	-0.434193	0.00327017	0.00893034
Arid5b	-0.308027	0.182249	-0.490276	0.000834379	0.00279276
Ank3	-0.484979	0.286946	-0.771925	2.74322e-07	3.20124e-06
Ccdc6	-0.416244	0.246278	-0.662522	1.09783e-05	7.00517e-05
Mrln	0.0254521	-0.0150591	0.0405112	0.79383	0.837585
Bicc1	-0.13975	0.0826853	-0.222435	0.13436	0.200047
Tfam	0.0193201	-0.0114311	0.0307511	0.841606	0.877982
Ube2d1	-0.358933	0.212369	-0.571302	0.000113401	0.000527126
Cisd1	0.513945	-0.304084	0.818029	8.16011e-08	1.10105e-06
Specc1l	-0.361135	0.213671	-0.574806	7.40146e-05	0.000363617
Snrpd3	-0.248746	0.147175	-0.395921	0.00871332	0.0204416
Ddt	0.135608	-0.0802344	0.215842	0.169173	0.243484
Mif	-0.0542255	0.0320834	-0.0863089	0.541999	0.623877
Chchd10	-0.45416	0.268711	-0.722871	2.42962e-07	2.86976e-06
Col6a2	-0.481162	0.284687	-0.765849	9.72901e-09	1.82855e-07
Col6a1	-0.494583	0.292628	-0.787212	8.46557e-09	1.63668e-07
Pofut2	-0.264313	0.156385	-0.420699	0.00337797	0.00915397
Itgb2	-0.0661469	0.0391369	-0.105284	0.484482	0.569823
Pttg1ip	-0.295716	0.174965	-0.470682	0.00115269	0.0036626
Sumo3	-0.340616	0.201531	-0.542147	0.000146417	0.000650257
Ube2g2	-0.188797	0.111705	-0.300502	0.0453952	0.0807348
Gatd3a	-0.245348	0.145164	-0.390512	0.0111041	0.0252047
Agpat3	-0.204949	0.121262	-0.326211	0.0337779	0.0635032
Rrp1	-0.380874	0.225351	-0.606225	2.67004e-05	0.000151915
Cstb	-0.0151956	0.00899072	-0.0241863	0.877538	0.9055
Pdxk	-0.191294	0.113182	-0.304476	0.0380218	0.0697934
Tpgs1	-0.0398963	0.0236053	-0.0635017	0.683255	0.748134
Cdc34	-0.439542	0.260063	-0.699605	1.89148e-06	1.62258e-05
Bsg	-0.829263	0.490647	-1.31991	1.67905e-23	1.08746e-20
Polrmt	-0.357375	0.211447	-0.568821	0.000131269	0.000595227
R3hdm4	-0.337661	0.199783	-0.537444	0.000239428	0.00097528
Wdr18	-0.135826	0.0803638	-0.21619	0.159885	0.232266
Polr2e	-0.132682	0.0785038	-0.211186	0.138519	0.20514
Gpx4	0.426934	-0.252603	0.679536	7.83817e-06	5.26064e-05
Stk11	-0.529184	0.3131	-0.842284	9.97091e-10	2.48507e-08
Atp5d	-0.721309	0.426775	-1.14808	4.27797e-16	5.03763e-14
Pwwp3a	-0.24399	0.144361	-0.38835	0.0114994	0.0259354
Ndufs7	0.00234329	-0.00138645	0.00372973	0.980464	0.984139
Gamt	-0.280714	0.166089	-0.446803	0.00211274	0.00614069
Adamtsl5	-0.303387	0.179504	-0.482891	0.000562035	0.00201482
Mbd3	-0.157185	0.0930013	-0.250187	0.0807034	0.131329
Uqcr11	0.437819	-0.259043	0.696862	5.51584e-06	3.89719e-05
Csnk1g2	-0.347393	0.205541	-0.552935	0.000140507	0.000629045
Btbd2	-0.377684	0.223463	-0.601147	5.0148e-05	0.000260877
Mknk2	-0.206965	0.122454	-0.329419	0.0244805	0.0484621
Ap3d1	-0.363935	0.215328	-0.579264	1.50193e-05	9.22036e-05
Dot1l	-0.407315	0.240995	-0.64831	6.0916e-06	4.24991e-05
Plekhj1	-0.276212	0.163426	-0.439638	0.00386312	0.01029
Sf3a2	-0.248477	0.147015	-0.395492	0.00675696	0.0163874
Jsrp1	-0.75001	0.443756	-1.19377	2.92648e-17	4.73845e-15
Oaz1	-0.325362	0.192506	-0.517868	0.000197752	0.000838021
Timm13	-0.108297	0.0640756	-0.172372	0.257578	0.344323
Gadd45b	-0.177685	0.10513	-0.282815	0.062885	0.106018
Sgta	-0.416365	0.246349	-0.662715	4.02664e-06	3.03836e-05
Map2k2	-0.362199	0.214301	-0.576499	8.34749e-05	0.000404973
Eef2	-0.598851	0.35432	-0.953171	1.07711e-11	4.39824e-10
Atcayos	-0.0536571	0.0317471	-0.0854042	0.585614	0.662736
Nmrk2	0.0686905	-0.0406419	0.109332	0.495666	0.579976
Pip5k1c	-0.461971	0.273333	-0.735304	7.81063e-08	1.06126e-06
Fzr1	-0.334323	0.197807	-0.53213	0.000182406	0.000782373
Nfic	-0.64883	0.383891	-1.03272	4.05656e-14	2.91922e-12
Gna11	-0.177816	0.105208	-0.283024	0.0605135	0.102349
Tle5	-0.283587	0.167789	-0.451376	0.00286143	0.00793683
Hcfc2	-0.0705904	0.041766	-0.112356	0.458506	0.546215
Nfyb	-0.0825725	0.0488554	-0.131428	0.385127	0.474359
Ckap4	-0.318525	0.188461	-0.506986	0.000177539	0.000764029
Ric8b	-0.0434432	0.0257039	-0.069147	0.650553	0.719218
Tmem263	-0.33717	0.199492	-0.536663	0.000160746	0.000705031
Timp3	-0.427298	0.252818	-0.680116	1.49694e-06	1.34068e-05
Hsp90b1	-0.372936	0.220654	-0.593589	9.39915e-06	6.12837e-05
Nt5dc3	-0.348063	0.205937	-0.554	0.000112575	0.00052454
Washc3	-0.139272	0.0824023	-0.221674	0.147099	0.216279
Chpt1	-0.271463	0.160615	-0.432078	0.00387432	0.010305
Mybpc1	-0.15063	0.089123	-0.239753	0.121004	0.183036
Arl1	-0.0342402	0.0202588	-0.0544991	0.719432	0.778533
Slc25a3	-0.0874939	0.0517672	-0.139261	0.371992	0.462372
Tmpo	-0.320318	0.189522	-0.50984	0.00044769	0.00166481
Elk3	-0.00880365	0.00520883	-0.0140125	0.926167	0.942663
Snrpf	0.0171983	-0.0101756	0.0273739	0.85413	0.885815
Metap2	-0.199072	0.117784	-0.316856	0.0321992	0.0610669
Ndufa12	0.207694	-0.122886	0.33058	0.0298388	0.0571763
Tmcc3	-0.3296	0.195013	-0.524614	0.000272109	0.00108788
Socs2	-0.156687	0.0927067	-0.249394	0.0689809	0.115146
Mrpl42	0.419422	-0.248158	0.66758	1.08177e-05	6.92545e-05
Ube2n	-0.289132	0.17107	-0.460202	0.0017893	0.00534862
Nudt4	-0.429758	0.254273	-0.684031	4.13064e-06	3.08686e-05
Dcn	0.322489	-0.190806	0.513295	0.00209878	0.00611383
Lum	-0.0242852	0.0143687	-0.0386539	0.788561	0.833383
Atp2b1	-0.198896	0.11768	-0.316576	0.038579	0.070716
Ccdc59	-0.160324	0.0948583	-0.255182	0.0922508	0.146261
Myf6	-0.00351943	0.00208233	-0.00560176	0.972466	0.978003
Nap1l1	-0.20353	0.120422	-0.323952	0.0175024	0.0366219
Atxn7l3b	-0.261849	0.154927	-0.416777	0.00357563	0.00960921
Rab21	-0.339656	0.200963	-0.54062	0.000225211	0.000927085
Tmem19	-0.306808	0.181528	-0.488335	0.00102544	0.0033458
Tspan8	0.274055	-0.162149	0.436204	0.00299892	0.00825985
Ptprb	-0.0841745	0.0498032	-0.133978	0.385116	0.474359
Rab3ip	-0.131642	0.0778881	-0.20953	0.145136	0.213797
Cct2	-0.0765084	0.0452675	-0.121776	0.398549	0.486879
Yeats4	-0.232196	0.137383	-0.369578	0.0107386	0.0245327
Lyz2	0.0189401	-0.0112062	0.0301463	0.84224	0.878171
Lyz1	-0.0780066	0.0461539	-0.12416	0.403333	0.492544
Cpsf6	-0.0581824	0.0344246	-0.0926071	0.53917	0.620804
Mdm2	-0.267197	0.158091	-0.425288	0.00573661	0.0142901
Rap1b	-0.230125	0.136157	-0.366282	0.0125874	0.0278241
Dyrk2	-0.298327	0.17651	-0.474838	0.000832948	0.00279276
Tmbim4	-0.106108	0.0627803	-0.168888	0.287803	0.376186
Msrb3	-0.502785	0.297481	-0.800265	8.3939e-09	1.63093e-07
Gns	-0.341995	0.202347	-0.544342	6.80892e-05	0.00033846
Rassf3	-0.347539	0.205627	-0.553166	0.000133207	0.000602612
Usp15	0.152308	-0.0901154	0.242423	0.122897	0.185573
Ctdsp2	-0.461232	0.272896	-0.734127	8.59167e-07	8.34681e-06
Tsfm	-0.24399	0.144361	-0.388351	0.00895866	0.0209467
Cdk4	-0.0818204	0.0484104	-0.130231	0.390648	0.479639
Os9	-0.268891	0.159094	-0.427985	0.00395173	0.0104679
Dtx3	-0.504042	0.298225	-0.802267	7.51771e-09	1.4905e-07
Dctn2	-0.330743	0.19569	-0.526433	0.000192718	0.00082297
R3hdm2	-0.542614	0.321047	-0.863661	2.35446e-09	5.31943e-08
Stac3	-0.143599	0.0849625	-0.228561	0.134326	0.200047
Shmt2	-0.382117	0.226086	-0.608204	2.71285e-05	0.000153675
Naca	-0.653975	0.386935	-1.04091	8.15172e-16	8.56151e-14
Ptges3	-0.3701	0.218976	-0.589075	1.93885e-05	0.000115381
Atp5b	0.0798524	-0.047246	0.127098	0.416557	0.505067
Spryd4	-0.0706983	0.0418298	-0.112528	0.449083	0.536635
Cs	-0.551318	0.326196	-0.877514	1.59268e-09	3.89256e-08
Coq10a	-0.11698	0.0692131	-0.186193	0.234831	0.318518
Nabp2	-0.341489	0.202048	-0.543537	0.000179131	0.000770024
Smarcc2	-0.467282	0.276475	-0.743757	4.24913e-07	4.66444e-06
Myl6	-0.378512	0.223953	-0.602465	7.22477e-05	0.000355836
Esyt1	-0.358236	0.211956	-0.570192	7.17122e-05	0.000353647
Pa2g4	-0.297032	0.175744	-0.472777	0.00100079	0.00327638
Suox	0.167916	-0.0993503	0.267266	0.0719229	0.119187
Rab5b	-0.00558798	0.00330622	-0.0088942	0.952749	0.964413
Sarnp	0.0393592	-0.0232875	0.0626468	0.680853	0.745925
Cd63	-0.285445	0.168888	-0.454333	0.00126873	0.00396324
Rdh5	0.0143239	-0.00847497	0.0227989	0.884745	0.909796
Itga7	-0.601013	0.355599	-0.956612	3.17944e-11	1.14401e-09
Drg1	-0.171021	0.101188	-0.272209	0.0645936	0.108522
Pik3ip1	-0.104162	0.0616295	-0.165792	0.281459	0.369511
Smtn	-0.37042	0.219165	-0.589586	3.50692e-05	0.000192002
Mtmr3	-0.0394289	0.0233288	-0.0627577	0.68974	0.75278
Uqcr10	0.361824	-0.214079	0.575903	0.00025011	0.00101242
Nf2	-0.317957	0.188124	-0.506081	0.000468321	0.00171526
Thoc5	-0.222096	0.131407	-0.353503	0.0109569	0.0249256
Xbp1	-0.052843	0.0312655	-0.0841085	0.564492	0.642579
Mrps24	-0.0462725	0.0273779	-0.0736504	0.623788	0.695564
Urgcp	-0.211115	0.124909	-0.336024	0.0317293	0.0603229
Ube2d-ps	-0.0301365	0.0178308	-0.0479673	0.749142	0.802417
Pgam2	-0.593017	0.350868	-0.943885	3.76994e-11	1.33182e-09
Aebp1	-0.485735	0.287393	-0.773129	4.48083e-08	6.72297e-07
Pold2	-0.186249	0.110197	-0.296446	0.0448139	0.0798838
Ykt6	-0.410277	0.242747	-0.653024	8.07451e-06	5.37287e-05
Camk2b	-0.479824	0.283896	-0.763719	1.10075e-07	1.4211e-06
Nudcd3	-0.254986	0.150867	-0.405853	0.00465341	0.0119735
Tmed4	-0.0103257	0.00610937	-0.0164351	0.91165	0.931547
Ogdh	-0.682203	0.403637	-1.08584	2.26824e-14	1.73965e-12
Zmiz2	-0.441794	0.261395	-0.703189	6.1631e-07	6.30258e-06
Ppia	0.0401946	-0.0237818	0.0639764	0.668782	0.735812
H2az2	-0.318645	0.188532	-0.507177	0.000370258	0.00141338
Purb	-0.448176	0.265171	-0.713346	4.09476e-07	4.5334e-06
Tns3	-0.441819	0.261409	-0.703228	9.1857e-08	1.21684e-06
Grb10	-0.313393	0.185424	-0.498817	0.000888365	0.00295059
Cobl	-0.199615	0.118105	-0.31772	0.0354942	0.0660903
Sec61g	0.168671	-0.0997967	0.268467	0.0815613	0.132337
Ppp3r1	-0.632628	0.374305	-1.00693	3.72442e-13	2.06759e-11
Pno1	0.157198	-0.0930086	0.250206	0.0907726	0.144271
C1d	0.020505	-0.0121321	0.0326372	0.830575	0.86904
Actr2	-0.0816476	0.0483082	-0.129956	0.372691	0.46256
Rab1a	-0.201639	0.119303	-0.320942	0.019752	0.0405688
Aftph	-0.271385	0.160569	-0.431954	0.00290148	0.00802501
Lgalsl	-0.165665	0.0980185	-0.263684	0.0962579	0.151748
Ugp2	0.21957	-0.129912	0.349482	0.0179657	0.0374945
Mdh1	0.711567	-0.42101	1.13258	1.0232e-16	1.47265e-14
Cct4	0.0926773	-0.054834	0.147511	0.333655	0.424413
Usp34	-0.303439	0.179535	-0.482974	0.00131085	0.00406217
Ppp4r3b	-0.156902	0.0928335	-0.249735	0.09851	0.154671
Rtn4	0.242483	-0.143469	0.385953	0.0139845	0.0302583
Sptbn1	-0.437684	0.258963	-0.696647	8.36987e-07	8.17898e-06
Acyp2	0.489615	-0.289689	0.779305	3.10125e-07	3.52382e-06
Psme4	-0.139233	0.0823796	-0.221613	0.167057	0.241311
Bod1	-0.314335	0.185981	-0.500316	0.00107948	0.00346683
Rhbdf1	-0.195617	0.11574	-0.311358	0.036332	0.0672636
Hba-a1	0.580307	-0.343348	0.923655	5.8888e-08	8.35755e-07
Hba-a2	0.605444	-0.358221	0.963665	1.25927e-08	2.30826e-07
Fbxw11	-0.039163	0.0231715	-0.0623345	0.6873	0.751356
Npm1	0.0868379	-0.0513791	0.138217	0.357454	0.448086
Pank3	-0.21978	0.130037	-0.349817	0.0203	0.0415709
Rars	0.0268656	-0.0158955	0.0427612	0.779306	0.826073
Mat2b	-0.0666864	0.0394561	-0.106143	0.477891	0.563607
Nudcd2	0.175449	-0.103807	0.279257	0.0775635	0.127017
Ccng1	0.0859187	-0.0508353	0.136754	0.380496	0.470575
Pttg1	0.0926231	-0.054802	0.147425	0.335751	0.4268
Slu7	-0.0200169	0.0118433	-0.0318602	0.832778	0.871058
Ttc1	-0.0783148	0.0463363	-0.124651	0.427654	0.515786
Ebf1	-0.187408	0.110883	-0.298292	0.0483738	0.0850207
Clint1	-0.346537	0.205034	-0.551571	0.000125594	0.00057486
Adam19	-0.40474	0.239471	-0.644211	4.98131e-06	3.57807e-05
Rack1	-0.183814	0.108756	-0.29257	0.045496	0.0808771
Mgat1	-0.178145	0.105402	-0.283547	0.0601649	0.102007
Mapk9	-0.208598	0.12342	-0.332018	0.0320145	0.060759
Sqstm1	-0.622771	0.368473	-0.991244	2.10886e-12	1.01173e-10
Canx	-0.0426358	0.0252262	-0.067862	0.653058	0.721576
Hnrnpab	-0.144983	0.0857817	-0.230765	0.119878	0.181688
Nhp2	0.044718	-0.0264582	0.0711762	0.627926	0.699175
Sec24a	-0.260231	0.15397	-0.414201	0.00736008	0.017621
Sar1b	0.705643	-0.417505	1.12315	4.67198e-15	3.94681e-13
Ube2b	0.380055	-0.224866	0.604921	4.2415e-05	0.000225787
Ppp2ca	-0.423507	0.250575	-0.674082	1.26188e-06	1.16201e-05
Skp1a	0.283389	-0.167672	0.45106	0.00350994	0.00947197
Vdac1	-0.442822	0.262003	-0.704825	7.98977e-06	5.34393e-05
Hspa4	-0.248338	0.146933	-0.395271	0.00629721	0.0154782
Uqcrq	0.206572	-0.122222	0.328794	0.0232459	0.0465397
Septin8	-0.209212	0.123784	-0.332996	0.0281961	0.0546431
Fnip1	-0.19758	0.116901	-0.314481	0.0274633	0.0534948
Hint1	-0.111987	0.0662587	-0.178245	0.230002	0.314271
Gpx3	0.0150922	-0.00892954	0.0240217	0.8813	0.907935
Anxa6	-0.400571	0.237004	-0.637575	1.29762e-05	8.10697e-05
Sparc	-0.423694	0.250685	-0.674379	1.21942e-06	1.12826e-05
Atox1	-0.0139916	0.00827834	-0.0222699	0.877972	0.905708
G3bp1	-0.402846	0.23835	-0.641196	3.42739e-06	2.62182e-05
Fam114a2	-0.190752	0.112862	-0.303614	0.0435697	0.0780959
Mfap3	0.0573607	-0.0339384	0.0912991	0.577444	0.655167
Larp1	-0.437709	0.258978	-0.696686	7.88629e-07	7.81789e-06
Cnot8	-0.0134539	0.00796022	-0.0214141	0.887157	0.911312
Mrpl22	0.101435	-0.0600155	0.16145	0.297477	0.386621
Rnf187	-0.36235	0.214391	-0.576741	4.20912e-05	0.000224371
Obscn	-0.604066	0.357406	-0.961472	2.2436e-12	1.06325e-10
Guk1	-0.192612	0.113962	-0.306574	0.0532721	0.0921707
Mrpl55	0.114815	-0.0679324	0.182748	0.258011	0.344784
Arf1	-0.327824	0.193962	-0.521786	0.000133975	0.000604676
Snap47	-0.243989	0.14436	-0.388349	0.00807853	0.0191655
Mprip	-0.193059	0.114227	-0.307286	0.0410366	0.0742058
Flcn	-0.368281	0.2179	-0.586181	3.85548e-05	0.000207225
Cops3	-0.0646576	0.0382558	-0.102913	0.482881	0.568801
Tom1l2	-0.408021	0.241413	-0.649434	3.01033e-06	2.34903e-05
Alkbh5	-0.16964	0.100371	-0.270011	0.0779718	0.127525
Flii	-0.0711439	0.0420935	-0.113237	0.439263	0.52652
Mief2	-0.187571	0.11098	-0.298551	0.0449869	0.080082
Dhrs7b	-0.265163	0.156888	-0.422051	0.0040787	0.0107602
Tmem11	-0.121215	0.0717186	-0.192933	0.208442	0.290741
Map2k3	-0.36257	0.21452	-0.57709	3.54898e-05	0.000193156
Slc47a1	-0.0633764	0.0374977	-0.100874	0.501061	0.585777
Ulk2	-0.158326	0.093676	-0.252002	0.104854	0.16292
Zswim7	0.133386	-0.0789201	0.212306	0.176979	0.252754
Ttc19	-0.339303	0.200755	-0.540058	0.00015501	0.000683733
Ncor1	-0.395832	0.2342	-0.630032	1.44918e-05	8.93892e-05
Ubb	-0.067577	0.039983	-0.10756	0.48371	0.569462
2410006H16Rik	-0.0776795	0.0459604	-0.12364	0.415049	0.504601
Trim16	0.0552285	-0.0326769	0.0879054	0.559484	0.638331
Pmp22	-0.177787	0.10519	-0.282977	0.0539431	0.0931658
Cox10	-0.298139	0.176399	-0.474538	0.00122402	0.0038577
Map2k4	-0.413896	0.244889	-0.658785	6.07923e-06	4.2489e-05
Myh3	-0.152816	0.0904163	-0.243233	0.129131	0.193746
2310065F04Rik	0.0583096	-0.0344998	0.0928094	0.555948	0.634856
Myh2	-0.0452167	0.0267532	-0.0719699	0.639594	0.709727
Myh1	-0.325647	0.192674	-0.518321	0.00104217	0.00338847
Myhas	-0.0883565	0.0522776	-0.140634	0.358134	0.448504
Myh4	-0.784341	0.464069	-1.24841	2.22144e-22	1.07906e-19
Myh8	-0.234972	0.139025	-0.373997	0.0154644	0.0329599
Dhrs7c	-0.0850374	0.0503138	-0.135351	0.40344	0.492544
Stx8	0.0826003	-0.0488718	0.131472	0.386067	0.475216
Ndel1	-0.226588	0.134065	-0.360653	0.0143577	0.0309451
Slc25a35	-0.114168	0.0675495	-0.181718	0.23173	0.315412
Rangrf	-0.022704	0.0134332	-0.0361372	0.816449	0.857028
Borcs6	-0.264154	0.156291	-0.420446	0.00416172	0.0109244
Vamp2	-0.337415	0.199637	-0.537052	0.000214547	0.000891118
Trappc1	0.362655	-0.214571	0.577226	0.000136192	0.00061326
Naa38	0.304493	-0.180158	0.484652	0.00148173	0.00449845
Trp53	-0.327019	0.193486	-0.520504	0.0001967	0.000835338
Atp1b2	-0.613587	0.363039	-0.976626	4.66958e-12	2.01622e-10
Fxr2	-0.408833	0.241893	-0.650725	2.61671e-06	2.11531e-05
Eif4a1	-0.158205	0.0936048	-0.25181	0.0744966	0.122563
Tnfsf12	-0.278772	0.16494	-0.443712	0.00140529	0.00431015
Polr2a	-0.32353	0.191422	-0.514952	0.000507812	0.0018391
Chrnb1	-0.325916	0.192834	-0.51875	0.000519534	0.0018798
Tmem256	0.0722923	-0.042773	0.115065	0.460432	0.547838
Gps2	-0.324759	0.192149	-0.516908	0.000331779	0.00128553
Eif5a	-0.331549	0.196167	-0.527716	0.000184107	0.000788797
Slc2a4	-0.389063	0.230196	-0.619259	2.01884e-05	0.000119594
Elp5	0.0399719	-0.02365	0.0636219	0.685196	0.749415
Ctdnep1	-0.726166	0.429648	-1.15581	4.63048e-16	5.14115e-14
Gabarap	-0.00486989	0.00288135	-0.00775125	0.958926	0.968145
Acadvl	0.0518513	-0.0306787	0.0825299	0.596071	0.671367
Mgl2	0.0707403	-0.0418547	0.112595	0.485183	0.570422
0610010K14Rik	0.0232837	-0.0137762	0.0370599	0.802262	0.844647
Rnasek	-0.322785	0.190981	-0.513766	0.00082135	0.00276343
Pelp1	-0.320194	0.189448	-0.509642	0.000684224	0.00236978
Psmb6	-0.12977	0.0767806	-0.206551	0.152644	0.223249
Mink1	-0.47591	0.28158	-0.75749	1.0317e-07	1.34537e-06
Chrne	-0.135494	0.0801672	-0.215661	0.16064	0.233102
Slc25a11	0.0105416	-0.00623711	0.0167787	0.915962	0.934965
Rnf167	-0.285465	0.1689	-0.454365	0.00188758	0.00561219
Pfn1	-0.289206	0.171114	-0.460319	0.00111939	0.00356846
Eno3	-0.253802	0.150166	-0.403968	0.00643886	0.0157665
Spag7	0.0395855	-0.0234214	0.0630069	0.669178	0.735831
Kif1c	-0.72566	0.429349	-1.15501	1.67253e-17	2.82584e-15
C1qbp	-0.366801	0.217024	-0.583825	7.64315e-05	0.000374072
Txndc17	0.0573512	-0.0339328	0.0912839	0.536127	0.618033
Smtnl2	-0.82219	0.486462	-1.30865	1.86625e-24	1.81306e-21
Ube2g1	-0.32286	0.191026	-0.513886	0.000665606	0.00231562
Emc6	-0.118139	0.0698992	-0.188039	0.211426	0.29427
Rap1gap2	-0.26082	0.154319	-0.415139	0.00638594	0.0156665
Cluh	-0.444279	0.262865	-0.707144	6.8662e-07	6.91245e-06
Pafah1b1	-0.0963528	0.0570088	-0.153362	0.313776	0.404155
Rpa1	-0.21134	0.125043	-0.336383	0.0276809	0.0537752
Serpinf1	-0.157326	0.0930844	-0.25041	0.104154	0.162351
Prpf8	-0.215975	0.127785	-0.34376	0.0128883	0.028328
Rilp	-0.182722	0.108111	-0.290833	0.0502695	0.0877259
Pitpna	-0.362541	0.214504	-0.577045	5.1091e-05	0.000265073
Inpp5k	0.00793162	-0.00469288	0.0126245	0.930312	0.946633
Ywhae	-0.363709	0.215195	-0.578904	6.48225e-05	0.000325874
Nxn	-0.0249425	0.0147576	-0.0397002	0.784393	0.82988
Cpd	-0.206655	0.122271	-0.328926	0.0216969	0.0439046
Blmh	-0.183841	0.108773	-0.292614	0.0559294	0.0960077
Nsrp1	-0.0818806	0.048446	-0.130327	0.382246	0.471858
Ssh2	-0.240152	0.14209	-0.382242	0.0123517	0.0274434
Coro6	-0.300397	0.177735	-0.478132	0.00181662	0.00542197
Git1	-0.26708	0.158022	-0.425102	0.0048643	0.012436
Taok1	-0.406413	0.240461	-0.646874	1.8616e-06	1.60048e-05
Nufip2	-0.248703	0.147149	-0.395852	0.00736402	0.017621
Myo18a	-0.504844	0.298699	-0.803543	1.17907e-08	2.17149e-07
Phf12	-0.344397	0.203768	-0.548165	0.000271887	0.00108788
Flot2	-0.489285	0.289493	-0.778778	2.05681e-08	3.47511e-07
Eral1	-0.213957	0.126591	-0.340548	0.0282215	0.0546431
Sdf2	-0.0794379	0.0470008	-0.126439	0.436985	0.524274
2610507B11Rik	-0.481298	0.284768	-0.766066	3.68811e-07	4.11839e-06
Vtn	0.03411	-0.0201817	0.0542917	0.722122	0.781009
Tmem199	-0.285174	0.168728	-0.453901	0.00211805	0.00615153
Poldip2	-0.224199	0.132651	-0.35685	0.0224649	0.0452089
Tnfaip1	-0.325118	0.192362	-0.51748	0.000500011	0.00181254
Ift20	-0.197444	0.116821	-0.314265	0.0395621	0.0720761
Lgals9	-0.0811227	0.0479976	-0.12912	0.387503	0.476681
Ksr1	-0.30592	0.181003	-0.486923	0.00103001	0.00335509
Suz12	-0.0563995	0.0333697	-0.0897692	0.535905	0.61796
Crlf3	-0.255975	0.151452	-0.407427	0.00463533	0.0119607
Rhot1	-0.209006	0.123662	-0.332668	0.0291559	0.0561725
Zfp207	-0.11273	0.0666984	-0.179428	0.224866	0.308829
Psmd11	-0.252748	0.149542	-0.40229	0.00639442	0.0156774
Unc45b	-0.0319254	0.0188892	-0.0508145	0.740314	0.795592
Slfn5	-0.246062	0.145587	-0.391648	0.00455589	0.0117949
Ccl6	0.0194985	-0.0115366	0.0310351	0.842699	0.878414
Ddx52	-0.122591	0.072533	-0.195124	0.2058	0.287572
Dusp14	-0.246155	0.145642	-0.391797	0.00652967	0.0159186
Ggnbp2	-0.0898056	0.053135	-0.142941	0.351046	0.441461
Appbp2	-0.21482	0.127102	-0.341922	0.0195691	0.0402998
Bcas3	-0.175373	0.103762	-0.279135	0.0712776	0.118268
Med13	-0.170182	0.100691	-0.270873	0.0686545	0.114798
Vmp1	-0.186862	0.11056	-0.297422	0.0399613	0.0726672
Cltc	-0.42252	0.249991	-0.672511	2.79281e-06	2.22851e-05
Septin4	-0.303128	0.179351	-0.482479	0.000830199	0.00279079
Dynll2	-0.775685	0.458947	-1.23463	7.58328e-21	2.45572e-18
Srsf1	-0.342595	0.202702	-0.545298	0.000293021	0.00116073
Vezf1	-0.160271	0.0948271	-0.255098	0.103101	0.160969
Cuedc1	-0.50983	0.30165	-0.81148	1.80765e-08	3.17852e-07
Mrps23	0.0781262	-0.0462247	0.124351	0.415801	0.504601
Msi2	-0.186048	0.110078	-0.296127	0.0397616	0.0723769
Trim25	-0.305706	0.180876	-0.486582	0.00119119	0.00376951
Tmem100	-0.00975584	0.00577221	-0.0155281	0.913439	0.932639
Nme2	0.193634	-0.114567	0.308201	0.037888	0.0696087
Nme1	-0.193872	0.114708	-0.308579	0.0361213	0.0670332
Spag9	-0.386015	0.228392	-0.614407	3.50996e-05	0.000192002
Ankrd40	-0.579698	0.342988	-0.922686	2.50852e-11	9.37317e-10
Col1a1	-0.621714	0.367847	-0.989561	2.4907e-15	2.2509e-13
Sgca	-0.0600963	0.035557	-0.0956532	0.537865	0.619486
Ppp1r9b	-0.340387	0.201395	-0.541782	0.00017201	0.000741875
Pdk2	-0.64381	0.380921	-1.02473	7.9242e-13	4.16127e-11
Kat7	-0.360801	0.213474	-0.574275	2.10183e-05	0.000123194
Slc35b1	-0.0301511	0.0178394	-0.0479905	0.761175	0.81128
Spop	-0.274027	0.162132	-0.436159	0.00333387	0.0090534
Phb	0.0980391	-0.0580065	0.156046	0.313657	0.404135
Zfp652	-0.419062	0.247945	-0.667006	9.19504e-06	6.02756e-05
Atp5g1	0.0724157	-0.042846	0.115262	0.405151	0.494322
Cbx1	-0.222259	0.131503	-0.353762	0.018577	0.0385839
Nfe2l1	-0.471728	0.279106	-0.750833	7.0162e-07	7.04521e-06
Sp2	-0.108796	0.0643707	-0.173166	0.260417	0.34764
Kpnb1	-0.210563	0.124583	-0.335146	0.0175349	0.0366348
Npepps	-0.47468	0.280852	-0.755532	7.73918e-08	1.05524e-06
Mrpl45	-0.0340415	0.0201412	-0.0541828	0.705859	0.767693
Socs7	-0.315937	0.186929	-0.502866	0.000457999	0.001687
Mllt6	-0.274639	0.162495	-0.437134	0.00476483	0.0122299
Cisd3	0.119974	-0.0709848	0.190959	0.213053	0.295899
Psmb3	-0.173706	0.102776	-0.276483	0.056482	0.0966062
Pip4k2b	-0.573308	0.339207	-0.912516	1.62865e-10	4.98341e-09
Cwc25	-0.205853	0.121797	-0.32765	0.0363291	0.0672636
Atp5l2-ps	0.444921	-0.263245	0.708166	9.97638e-07	9.47878e-06
Lasp1	-0.262947	0.155577	-0.418524	0.00414628	0.0109017
Cacnb1	-0.482293	0.285357	-0.76765	1.75843e-07	2.14882e-06
Tcap	-0.619433	0.366498	-0.985931	3.12816e-12	1.41349e-10
Mien1	-0.0863691	0.0511017	-0.137471	0.345389	0.436624
Psmd3	-0.375312	0.22206	-0.597372	3.27832e-05	0.000180711
Med24	-0.16386	0.0969507	-0.260811	0.0963898	0.151894
Thra	-0.269141	0.159241	-0.428382	0.00540874	0.0136483
Nr1d1	-0.525387	0.310854	-0.836241	5.91017e-09	1.21518e-07
Msl1	-0.421765	0.249544	-0.671309	6.39555e-06	4.43014e-05
Wipf2	-0.416506	0.246433	-0.662938	1.47219e-06	1.33045e-05
Rara	-0.427842	0.25314	-0.680981	1.91767e-06	1.63594e-05
Igfbp4	-0.316046	0.186994	-0.50304	0.00152057	0.00460557
Smarce1	-0.115111	0.0681071	-0.183218	0.220416	0.304384
Eif1	-0.738929	0.4372	-1.17613	1.14956e-17	2.12724e-15
Jup	-0.27995	0.165637	-0.445587	0.00335461	0.00910336
Dnajc7	-0.347337	0.205508	-0.552844	9.6823e-05	0.000459182
Rab5c	-0.209768	0.124113	-0.33388	0.0213042	0.0432314
Stat5b	-0.412177	0.243871	-0.656049	5.04916e-06	3.62012e-05
Stat3	-0.290837	0.172078	-0.462915	0.00140893	0.00431791
Cavin1	-0.336341	0.199002	-0.535342	0.000297157	0.00117353
Atp6v0a1	-0.566144	0.334969	-0.901113	1.72501e-11	6.63701e-10
Coasy	-0.197	0.116558	-0.313559	0.0390501	0.0713106
Ezh1	-0.354132	0.209528	-0.563659	0.000145464	0.000646765
Ramp2	-0.104402	0.0617714	-0.166174	0.294772	0.384262
Coa3	0.0169526	-0.0100303	0.0269829	0.861568	0.891863
Psme3	-0.31467	0.18618	-0.500849	0.0004634	0.00170367
Ptges3l	-0.198414	0.117395	-0.315809	0.0292675	0.0563316
Rdm1	0.11685	-0.0691362	0.185986	0.225934	0.31013
Dusp3	-0.506018	0.299394	-0.805413	1.88559e-08	3.27115e-07
Mpp3	-0.304803	0.180342	-0.485144	0.0010539	0.00341289
Cd300lg	-0.0177689	0.0105133	-0.0282822	0.852703	0.884621
Lsm12	-0.10315	0.0610302	-0.16418	0.232305	0.315973
G6pc3	-0.212213	0.125559	-0.337773	0.0232118	0.0464954
Asb16	-0.406073	0.24026	-0.646332	2.83957e-06	2.24737e-05
Slc25a39	-0.311178	0.184114	-0.495292	0.000601214	0.00212007
Grn	-0.290328	0.171777	-0.462105	0.00111415	0.00355467
Ccdc43	0.148898	-0.0880981	0.236996	0.112944	0.172321
Nmt1	-0.229064	0.135529	-0.364593	0.0170501	0.0357951
Hexim1	-0.283574	0.167781	-0.451356	0.00157577	0.00475792
Nsf	-0.206816	0.122366	-0.329182	0.0277884	0.053912
Mapt	-0.451165	0.26694	-0.718105	2.79959e-06	2.22935e-05
Myl4	0.127709	-0.0755612	0.20327	0.231171	0.315093
Tlk2	-0.268479	0.15885	-0.427329	0.00411244	0.0108345
Ace	-0.330737	0.195686	-0.526424	0.000412385	0.00155585
Dcaf7	-0.368837	0.218229	-0.587066	0.000110411	0.000515692
Map3k3	-0.0527818	0.0312292	-0.084011	0.580969	0.658397
Ccdc47	0.0473859	-0.0280366	0.0754225	0.637283	0.707365
Psmc5	-0.336638	0.199178	-0.535816	0.000328494	0.00127781
Scn4a	-0.457274	0.270554	-0.727827	2.90981e-07	3.37538e-06
Tex2	-0.26511	0.156857	-0.421967	0.00423819	0.0110692
Pecam1	0.0926317	-0.0548071	0.147439	0.347558	0.43851
Ddx5	-0.29765	0.17611	-0.473759	0.00104375	0.00338847
Pitpnc1	-0.536572	0.317471	-0.854043	9.97611e-10	2.48507e-08
Psmd12	0.0855789	-0.0506342	0.136213	0.345267	0.436612
Helz	-0.0355128	0.0210117	-0.0565245	0.725697	0.784003
Cacng1	-0.122488	0.072472	-0.19496	0.17647	0.252241
Prkca	-0.430091	0.25447	-0.684561	3.72462e-06	2.82142e-05
Gna13	-0.229537	0.135809	-0.365347	0.013424	0.0293067
Amz2	-0.209813	0.124139	-0.333952	0.0272429	0.0532196
Wipi1	-0.269019	0.15917	-0.428189	0.00461776	0.0119392
Prkar1a	0.000525247	-0.000310771	0.000836018	0.995796	0.996309
Abca8a	-0.220722	0.130594	-0.351316	0.0188804	0.0390885
Cog1	-0.201641	0.119304	-0.320945	0.0234123	0.0467284
Fam104a	-0.346817	0.2052	-0.552017	0.000198408	0.000839886
Mrpl58	0.00641486	-0.00379546	0.0102103	0.949076	0.961447
Atp5h	0.574501	-0.339913	0.914414	2.66703e-09	5.92233e-08
Jpt1	-0.135591	0.0802245	-0.215815	0.143047	0.21112
Sumo2	0.322031	-0.190535	0.512566	0.000993881	0.00325926
Mif4gd	-0.152802	0.090408	-0.24321	0.088664	0.141498
Grb2	-0.295828	0.175032	-0.47086	0.00174512	0.00522864
H3f3b	-0.084099	0.0497585	-0.133857	0.358115	0.448504
Wbp2	-0.55951	0.331043	-0.890554	1.52546e-10	4.74234e-09
Mrpl38	-0.115317	0.0682293	-0.183546	0.244009	0.329242
Acox1	0.0232215	-0.0137394	0.0369609	0.813609	0.854509
Srp68	-0.158984	0.0940654	-0.253049	0.0867813	0.139065
Exoc7	-0.315253	0.186525	-0.501778	0.00045242	0.00167438
Ubald2	-0.403205	0.238563	-0.641768	9.2283e-06	6.03723e-05
Cygb	-0.449879	0.266179	-0.716058	1.64737e-06	1.44952e-05
Mettl23	0.0540276	-0.0319663	0.0859939	0.608124	0.68173
Srsf2	-0.59403	0.351468	-0.945498	9.24766e-12	3.90613e-10
Sec14l1	-0.202765	0.11997	-0.322735	0.0265711	0.0520177
Syngr2	-0.042744	0.0252902	-0.0680342	0.66592	0.733257
Pgs1	-0.487299	0.288319	-0.775618	7.74155e-09	1.52709e-07
Timp2	-0.379414	0.224486	-0.6039	1.77033e-05	0.000106165
Lgals3bp	-0.2626	0.155372	-0.417972	0.00183034	0.00545871
Gaa	-0.442299	0.261693	-0.703992	1.5459e-06	1.37468e-05
Ndufaf8	0.0891567	-0.0527511	0.141908	0.363096	0.453258
Slc38a10	-0.248253	0.146883	-0.395137	0.00593551	0.0147195
Actg1	-0.440487	0.260621	-0.701108	6.85633e-07	6.91245e-06
Nploc4	-0.481123	0.284664	-0.765787	4.01156e-08	6.16163e-07
Mrpl12	-0.144662	0.0855918	-0.230254	0.124802	0.187904
Mcrip1	-0.0891526	0.0527486	-0.141901	0.342296	0.433419
Ppp1r27	0.048981	-0.0289804	0.0779615	0.612545	0.685416
P4hb	-0.0957985	0.0566808	-0.152479	0.295552	0.384891
Arhgdia	-0.359238	0.212549	-0.571787	3.30933e-05	0.000182154
Anapc11	-0.299096	0.176965	-0.47606	0.000764173	0.00260947
Mafg	-0.402623	0.238219	-0.640842	2.28103e-05	0.0001323
Cenpx	0.0191507	-0.0113308	0.0304815	0.846293	0.880743
Dcxr	-0.180372	0.10672	-0.287092	0.0492172	0.0861911
Cbr2	0.0859597	-0.0508595	0.136819	0.394594	0.483081
Hmga1b	-0.185872	0.109974	-0.295846	0.0483024	0.084972
Slc16a3	-0.443629	0.26248	-0.706109	4.5882e-07	4.99433e-06
Csnk1d	-0.452494	0.267726	-0.72022	1.76486e-07	2.14992e-06
Wdr45b	0.0889562	-0.0526324	0.141589	0.332155	0.42292
Rab10	-0.504753	0.298645	-0.803398	2.2089e-09	5.02387e-08
Dnmt3a	-0.410225	0.242717	-0.652942	2.62947e-06	2.11994e-05
Dnajc27	-0.212693	0.125843	-0.338536	0.0180229	0.0375734
Ptrhd1	-0.142333	0.0842136	-0.226546	0.152521	0.223154
Ncoa1	-0.370828	0.219407	-0.590235	2.80732e-05	0.000158564
Sf3b6	0.00543847	-0.00321776	0.00865624	0.953925	0.96485
Ubxn2a	-0.0279484	0.0165361	-0.0444845	0.773403	0.820813
Rhob	-0.295017	0.174552	-0.469569	0.000682592	0.00236624
Pum2	-0.400951	0.23723	-0.638181	5.74533e-06	4.03731e-05
Laptm4a	0.116941	-0.0691898	0.18613	0.207714	0.290038
Rdh14	-0.0146572	0.00867218	-0.0233294	0.885051	0.90987
Smc6	-0.0943416	0.0558188	-0.15016	0.324117	0.414861
Ddx1	-0.0425643	0.0251838	-0.0677481	0.655116	0.723033
Lpin1	-0.424325	0.251059	-0.675384	4.2727e-06	3.17471e-05
E2f6	0.162694	-0.0962608	0.258955	0.0909861	0.144433
Rock2	-0.293909	0.173896	-0.467804	0.00271153	0.00758059
Pdia6	-0.105659	0.0625148	-0.168174	0.247926	0.333139
Odc1	-0.105238	0.0622655	-0.167503	0.277171	0.365238
Hpcal1	-0.254561	0.150615	-0.405176	0.00624203	0.0153725
Bnip3l-ps	-0.0660265	0.0390657	-0.105092	0.460236	0.547773
Itgb1bp1	-0.00809079	0.00478705	-0.0128778	0.93176	0.947859
Ywhaq	-0.10192	0.0603026	-0.162223	0.267957	0.356237
Adi1	-0.102095	0.0604059	-0.1625	0.286731	0.375202
Trappc12	-0.0515592	0.0305059	-0.0820651	0.601606	0.675872
Acp1	0.0369491	-0.0218615	0.0588106	0.69647	0.758968
Dld	-0.0358104	0.0211878	-0.0569982	0.708421	0.769403
Hbp1	0.393153	-0.232616	0.625769	8.87816e-05	0.000426987
Nampt	0.356764	-0.211085	0.56785	0.00020148	0.000848402
Sypl	-0.058557	0.0346462	-0.0932032	0.542239	0.623969
Snx13	-0.140569	0.0831698	-0.223738	0.141506	0.209244
Tspan13	-0.0917337	0.0542758	-0.146009	0.3281	0.418994
Bzw2	0.0386671	-0.022878	0.0615452	0.718472	0.777711
Lsmem1	0.0439817	-0.0260225	0.0700041	0.641977	0.711153
Ifrd1	-0.386521	0.228692	-0.615213	3.63361e-05	0.00019666
Dnajb9	-0.189643	0.112206	-0.301849	0.0365638	0.0675962
Pnpla8	0.298419	-0.176564	0.474983	0.0024155	0.00687631
Strn3	-0.249222	0.147456	-0.396678	0.00405983	0.010725
Ap4s1	0.34157	-0.202095	0.543665	0.000353344	0.00135681
Hectd1	-0.0802164	0.0474614	-0.127678	0.407796	0.49677
Akap6	0.00557719	-0.00329984	0.00887703	0.953742	0.96485
Egln3	-0.0725287	0.0429128	-0.115442	0.431212	0.519271
Sptssa	-0.0487994	0.028873	-0.0776723	0.611509	0.68482
Eapp	0.0874505	-0.0517415	0.139192	0.363448	0.453551
Snx6	-0.0636252	0.0376449	-0.10127	0.536649	0.61843
Cfl2	0.0710558	-0.0420413	0.113097	0.477818	0.563607
Srp54a	-0.0260743	0.0154273	-0.0415016	0.791995	0.836195
Srp54b	0.0518341	-0.0306685	0.0825026	0.602334	0.676494
Srp54c	0.116722	-0.0690605	0.185782	0.253189	0.339508
Psma6	-0.437796	0.259029	-0.696825	8.04356e-07	7.9535e-06
Nfkbia	-0.430331	0.254612	-0.684943	2.603e-07	3.04677e-06
Ralgapa1	-0.0118452	0.0070084	-0.0188536	0.904214	0.925165
Cox6c2	0.057925	-0.0342723	0.0921973	0.552511	0.632724
Sec23a	0.0384824	-0.0227687	0.0612511	0.683683	0.748392
Mia2	-0.232122	0.137339	-0.36946	0.0113906	0.0257349
Prpf39	-0.18501	0.109465	-0.294475	0.0514912	0.089568
Fkbp3	0.508286	-0.300736	0.809022	5.52941e-07	5.76067e-06
Klhdc2	-0.130834	0.07741	-0.208244	0.185156	0.263077
Nemf	-0.15947	0.094353	-0.253823	0.0757125	0.1243
Arf6	-0.402139	0.237933	-0.640072	1.57407e-05	9.60341e-05
Sos2	-0.225616	0.133489	-0.359105	0.0134513	0.0293331
Map4k5	0.0386024	-0.0228397	0.0614421	0.684367	0.74893
Tmx1	-0.137978	0.0816371	-0.219615	0.121514	0.183665
Actr10	-0.0847913	0.0501682	-0.134959	0.381419	0.471365
Psma3	0.426156	-0.252143	0.678299	1.08001e-05	6.92545e-05
Jkamp	-0.051334	0.0303726	-0.0817067	0.59156	0.668048
Dhrs7	0.113312	-0.0670428	0.180355	0.268327	0.356607
Ppm1a	-0.35136	0.207888	-0.559248	0.00016153	0.000706081
Hif1a	-0.174125	0.103024	-0.277149	0.0547713	0.0944282
Rhoj	-0.308182	0.182341	-0.490522	0.000799497	0.00270867
Wdr89	-0.529703	0.313407	-0.84311	5.80765e-10	1.5249e-08
AC124742.1	-0.322691	0.190926	-0.513617	0.000383219	0.00145713
Mthfd1	0.0522435	-0.0309107	0.0831542	0.594951	0.670333
Sptb	-0.415958	0.246108	-0.662066	4.31206e-06	3.17963e-05
Max	-0.315827	0.186864	-0.502691	0.000739516	0.00253014
Mpp5	-0.233015	0.137867	-0.370882	0.0138447	0.0300319
Atp6v1d	-0.0117003	0.00692267	-0.018623	0.902869	0.924032
Vti1b	-0.118281	0.0699828	-0.188263	0.211241	0.294118
Zfp36l1	-0.136229	0.0806023	-0.216832	0.136357	0.202477
Dcaf5	-0.264124	0.156273	-0.420397	0.00584467	0.014522
Exd2	-0.18957	0.112162	-0.301733	0.0423947	0.0763321
Erh	0.0401458	-0.023753	0.0638988	0.660931	0.728411
Slc39a9	-0.130207	0.077039	-0.207246	0.167574	0.241899
Srsf5	-0.391881	0.231863	-0.623745	9.39258e-06	6.12837e-05
Slc8a3	-0.259259	0.153395	-0.412654	0.00567707	0.014169
Cox16	0.0781786	-0.0462557	0.124434	0.410452	0.499535
Synj2bp	0.00219076	-0.0012962	0.00348695	0.981109	0.984172
Pcnx	-0.199501	0.118038	-0.31754	0.0412324	0.0744559
Rbm25	-0.413508	0.244659	-0.658166	1.51648e-06	1.35472e-05
Ptgr2	0.239716	-0.141832	0.381549	0.00923752	0.0215071
Npc2	-0.178749	0.10576	-0.284509	0.0421327	0.0759053
Isca2	0.13907	-0.0822831	0.221353	0.13229	0.197647
Fcf1	-0.0972694	0.057551	-0.15482	0.309758	0.399907
Dlst	-0.141014	0.0834335	-0.224448	0.125889	0.189394
Nek9	-0.475408	0.281283	-0.756691	9.3551e-07	8.95416e-06
Tmed10	-0.556614	0.32933	-0.885943	6.67426e-11	2.25532e-09
Irf2bpl	-0.217105	0.128454	-0.345559	0.0262357	0.051439
Gstz1	-0.0793729	0.0469623	-0.126335	0.381483	0.471365
Ahsa1	-0.244719	0.144792	-0.389511	0.00791003	0.0187887
Slirp	-0.0758137	0.0448565	-0.12067	0.43089	0.519045
Snw1	-0.220112	0.130233	-0.350345	0.0203041	0.0415709
Ston2	-0.243724	0.144203	-0.387927	0.0126793	0.0279616
Sel1l	-0.346203	0.204837	-0.551039	0.000111272	0.000519089
Zc3h14	-0.00919035	0.00543763	-0.014628	0.922472	0.940379
Foxn3	-0.545555	0.322787	-0.868341	2.21071e-09	5.02387e-08
Psmc1	-0.242231	0.14332	-0.385551	0.00880585	0.0206142
Calm1	-0.370281	0.219083	-0.589365	2.46748e-05	0.000142053
Ttc7b	-0.146383	0.08661	-0.232993	0.13852	0.20514
Ccdc88c	-0.375714	0.222297	-0.598011	5.4667e-05	0.000281372
Ndufb1-ps	0.424702	-0.251282	0.675983	2.67241e-06	2.14566e-05
Asb2	-0.515723	0.305136	-0.820859	1.6948e-09	4.09067e-08
Ddx24	-0.135702	0.0802903	-0.215992	0.157564	0.229452
Ifi27	-0.0384997	0.022779	-0.0612787	0.7034	0.765877
Serpina3n	0.352558	-0.208597	0.561154	0.000570855	0.00203331
Glrx5	-0.482287	0.285353	-0.767639	3.05256e-07	3.4889e-06
Gskip	-0.0601172	0.0355693	-0.0956865	0.531437	0.614266
Papola	-0.248058	0.146768	-0.394826	0.00583678	0.0145117
Setd3	-0.235689	0.139449	-0.375138	0.0122521	0.0272689
Ccnk	-0.644912	0.381573	-1.02649	4.4186e-13	2.41841e-11
Eml1	-0.217803	0.128867	-0.34667	0.0247205	0.0489123
Meg3	-0.399168	0.236174	-0.635342	1.08909e-05	6.96088e-05
Ppp2r5c	-0.123074	0.0728189	-0.195893	0.178295	0.254539
Dync1h1	-0.448845	0.265566	-0.714411	4.30859e-07	4.71639e-06
Hsp90aa1	-0.13234	0.0783013	-0.210641	0.16005	0.232419
Traf3	-0.277587	0.164239	-0.441826	0.00278809	0.00774748
Tnfaip2	-0.675617	0.39974	-1.07536	2.02714e-14	1.60764e-12
Eif5	-0.260586	0.15418	-0.414765	0.00555719	0.0139414
Mark3	-0.187825	0.11113	-0.298954	0.0634003	0.106748
Apopt1	-0.149522	0.0884669	-0.237988	0.133497	0.199067
Klc1	-0.365502	0.216255	-0.581757	7.73433e-05	0.000378058
Atp5mpl	0.299914	-0.177449	0.477364	0.00171542	0.00515157
Adssl1	-0.406769	0.240671	-0.64744	1.25453e-05	7.86306e-05
Siva1	0.0220011	-0.0130173	0.0350185	0.824427	0.864469
Akt1	-0.51974	0.307513	-0.827253	1.72772e-09	4.09417e-08
Ahnak2	-0.370826	0.219405	-0.590231	2.75578e-05	0.00015588
Btbd6	-0.248948	0.147295	-0.396243	0.0124774	0.0276281
Mta1	-0.306155	0.181142	-0.487297	0.000605748	0.00213412
Crip2	-0.326127	0.192959	-0.519086	0.000139471	0.000625838
Crip1	-0.205707	0.12171	-0.327417	0.0233628	0.0467185
Ighm	-0.24758	0.146485	-0.394065	0.00508669	0.0129111
Gdi2	-0.417155	0.246817	-0.663972	2.98357e-06	2.33753e-05
Klf6	-0.275731	0.163141	-0.438872	0.00278547	0.00774748
Gtpbp4	-0.152393	0.090166	-0.242559	0.104063	0.16234
Larp4b	-0.281731	0.166691	-0.448422	0.00278917	0.00774748
Zmynd11	-0.497273	0.29422	-0.791493	2.55821e-08	4.1595e-07
Actn2	-0.337796	0.199863	-0.537659	0.000349416	0.00134439
Nid1	-0.195864	0.115886	-0.31175	0.0334028	0.0629502
Mrpl32	0.172875	-0.102284	0.27516	0.0816565	0.132436
Psma2	0.323185	-0.191218	0.514403	0.000565612	0.00202019
Rala	-0.243703	0.144191	-0.387895	0.00733693	0.0175993
Vps41	-0.100833	0.0596595	-0.160492	0.309524	0.39987
Epdr1	0.124055	-0.0733993	0.197454	0.193304	0.27266
AK157302	0.175191	-0.103655	0.278846	0.0793439	0.129387
Cox5b-ps	0.0568866	-0.0336579	0.0905444	0.546429	0.628046
H2bc4	-0.0433116	0.025626	-0.0689376	0.645823	0.715005
Hfe	-0.176235	0.104272	-0.280507	0.0699587	0.116626
H1f2	-0.165656	0.098013	-0.263669	0.0759745	0.124678
BC005537	-0.270725	0.160179	-0.430903	0.00442589	0.0115044
Acot13	0.236039	-0.139656	0.375695	0.0107736	0.0245982
Sox4	-0.336988	0.199384	-0.536372	0.000201512	0.000848402
Cdkal1	0.217377	-0.128614	0.345991	0.0143451	0.0309451
Uqcrfs1	-0.166117	0.0982859	-0.264403	0.0688239	0.114933
Dusp22	-0.30364	0.179654	-0.483294	0.00228	0.00656303
Exoc2	0.0348576	-0.0206241	0.0554816	0.716065	0.775538
Mylk4	-0.559984	0.331324	-0.891308	6.37053e-10	1.65039e-08
Serpinb6a	-0.468406	0.27714	-0.745546	9.42944e-08	1.23793e-06
Psmg4	-0.173594	0.10271	-0.276304	0.0605226	0.102349
Eci2	0.176325	-0.104326	0.280651	0.0812711	0.132032
Lyrm4	-0.119085	0.0704587	-0.189544	0.199361	0.280086
Fars2	-0.0662696	0.0392095	-0.105479	0.491075	0.575488
F13a1	-0.185289	0.109629	-0.294918	0.0485394	0.0852345
Ssr1	-0.447925	0.265023	-0.712948	3.59505e-06	2.73929e-05
Riok1	-0.122004	0.0721857	-0.19419	0.194742	0.274391
Eef1e1	0.134902	-0.0798172	0.21472	0.174371	0.249671
Pak1ip1	-0.204228	0.120835	-0.325063	0.0338481	0.0636042
Tmem14c	-0.196972	0.116542	-0.313514	0.0309444	0.059004
Smim13	-0.219774	0.130033	-0.349807	0.025219	0.0497466
Tbc1d7	-0.102155	0.0604417	-0.162597	0.280686	0.36862
Nol7	0.0206762	-0.0122334	0.0329096	0.829653	0.868332
Ranbp9	-0.0488441	0.0288994	-0.0777435	0.605204	0.679128
Mcur1	-0.108383	0.0641266	-0.17251	0.239434	0.324082
Jarid2	-0.476881	0.282155	-0.759036	1.85082e-07	2.24059e-06
Dtnbp1	-0.245234	0.145097	-0.390331	0.00678254	0.016432
Gmpr	-0.235973	0.139617	-0.37559	0.0154872	0.0329599
Atxn1	-0.14088	0.0833539	-0.224234	0.135668	0.201685
Rbm24	-0.517303	0.306071	-0.823374	8.1613e-09	1.60176e-07
Cap2	-0.0937182	0.0554499	-0.149168	0.340603	0.431416
Fam8a1	-0.449235	0.265798	-0.715033	4.90442e-07	5.2503e-06
Kif13a	-0.28203	0.166868	-0.448898	0.00275858	0.00769552
Phf2	-0.374857	0.221791	-0.596648	6.68416e-05	0.00033417
Fam120a	-0.524116	0.310102	-0.834218	1.67291e-09	4.06307e-08
Wnk2	-0.195788	0.115841	-0.311629	0.0409946	0.0741989
Card19	-0.0584397	0.0345768	-0.0930166	0.524038	0.607885
Ogn	0.166371	-0.0984359	0.264806	0.102537	0.160217
Iars	-0.130612	0.0772785	-0.20789	0.137392	0.203859
Sema4d	-0.194524	0.115093	-0.309617	0.0342068	0.0641232
Gadd45g	-0.485785	0.287423	-0.773208	5.06514e-08	7.39967e-07
Auh	-0.127271	0.0753021	-0.202573	0.189936	0.268593
Sptlc1	-0.272695	0.161345	-0.43404	0.00309027	0.00848079
4833439L19Rik	-0.18251	0.107985	-0.290495	0.0546222	0.0942549
Higd2a	-0.192116	0.113669	-0.305785	0.0402984	0.0731401
Cltb	-0.361343	0.213794	-0.575137	0.000170886	0.000737846
Nsd1	-0.166468	0.0984936	-0.264962	0.0724941	0.119826
Rab24	-0.170641	0.100963	-0.271604	0.0808593	0.131527
Lman2	-0.391122	0.231414	-0.622535	1.59244e-05	9.6842e-05
Pdlim7	-0.468248	0.277047	-0.745295	1.08078e-07	1.40465e-06
Tmed9	-0.0895124	0.0529615	-0.142474	0.355838	0.446492
Ddx46	-0.292673	0.173165	-0.465838	0.00163145	0.00492223
B230219D22Rik	-0.0998271	0.0590644	-0.158892	0.316179	0.40671
Pcbd2	0.127992	-0.0757287	0.203721	0.192849	0.272117
Macroh2a1	-0.203524	0.120418	-0.323942	0.0235605	0.0469519
Cxcl14	-0.374432	0.221539	-0.595971	4.75456e-05	0.000248336
Tgfbi	-0.242643	0.143564	-0.386206	0.00579849	0.0144257
Smad5	-0.211283	0.125009	-0.336293	0.0287069	0.0553623
Hnrnpa0	-0.300709	0.177919	-0.478628	0.0006704	0.00232813
Ubqln1	-0.296203	0.175253	-0.471456	0.000815563	0.00274872
2210016F16Rik	0.0308733	-0.0182667	0.04914	0.756139	0.807463
Hnrnpk	-0.0927524	0.0548785	-0.147631	0.304604	0.394695
Agtpbp1	-0.0519399	0.0307311	-0.082671	0.588071	0.664895
Naa35	-0.199109	0.117806	-0.316915	0.0270566	0.0528883
Isca1	0.104371	-0.061753	0.166124	0.285756	0.374267
Gas1	-0.169026	0.100007	-0.269033	0.0838896	0.135155
Aopep	-0.213297	0.126201	-0.339498	0.0254549	0.0501358
Ctsl	-0.130389	0.0771471	-0.207536	0.149287	0.219083
Uqcrb	0.449261	-0.265813	0.715073	1.4902e-06	1.34049e-05
Ptdss1	-0.0923401	0.0546345	-0.146975	0.337297	0.428346
Adcy2	0.0146605	-0.00867412	0.0233346	0.882391	0.908611
Nsun2	-0.068864	0.0407445	-0.109608	0.48412	0.569743
Ndufs6	0.372618	-0.220465	0.593083	0.000103817	0.00048842
Mrpl36	-0.0422513	0.0249987	-0.0672501	0.661463	0.728791
Exoc3	0.0234542	-0.013877	0.0373312	0.795109	0.838707
Sdha	-0.0357174	0.0211328	-0.0568502	0.708055	0.76922
Ccdc127	0.135741	-0.0803133	0.216054	0.188828	0.267123
Lrrc14b	-0.179628	0.10628	-0.285908	0.0553853	0.0952721
Ftl1-ps1	-0.317175	0.187662	-0.504838	0.00013941	0.000625838
Cast	-0.0933134	0.0552104	-0.148524	0.333096	0.42398
Glrx	0.118157	-0.0699098	0.188067	0.221391	0.305296
Cetn3	0.127875	-0.0756592	0.203534	0.161043	0.233513
Mef2c	-0.220301	0.130345	-0.350646	0.0276207	0.0537207
Rasa1	-0.196914	0.116507	-0.313421	0.0276867	0.0537752
Cox7c	0.556242	-0.32911	0.885351	9.22491e-09	1.76591e-07
Tmem167	0.0176108	-0.0104197	0.0280305	0.848679	0.882288
Ssbp2	0.00271502	-0.00160639	0.00432141	0.977078	0.981371
Ckmt2	0.336445	-0.199063	0.535509	0.000493108	0.00178919
Serinc5	-0.151867	0.0898548	-0.241722	0.103766	0.161942
Thbs4	0.078052	-0.0461808	0.124233	0.45273	0.539831
Cmya5	-0.448804	0.265542	-0.714346	1.80248e-06	1.56669e-05
Homer1	-0.227175	0.134412	-0.361586	0.0153716	0.0328209
Jmy	-0.12919	0.0764373	-0.205627	0.145053	0.213756
Scamp1	-0.115994	0.0686301	-0.184625	0.268617	0.356871
Ap3b1	-0.24708	0.146189	-0.39327	0.00903133	0.0210912
Tbca	0.217968	-0.128964	0.346932	0.0272668	0.0532196
Aggf1	-0.137543	0.0813798	-0.218923	0.167881	0.242162
F2r	-0.183138	0.108357	-0.291495	0.0481074	0.0847056
Col4a3bp	-0.148889	0.0880927	-0.236982	0.132722	0.198064
Nsa2	0.0894742	-0.0529389	0.142413	0.368449	0.458614
Hexb	-0.238832	0.141309	-0.380141	0.0104948	0.0240323
Btf3	0.0436087	-0.0258018	0.0694105	0.64733	0.716265
Tnpo1	-0.189836	0.11232	-0.302156	0.0340749	0.0639069
Ptcd2	0.149373	-0.0883791	0.237752	0.131675	0.19688
Mrps27	-0.175072	0.103585	-0.278657	0.0655502	0.110034
Map1b	-0.18927	0.111985	-0.301255	0.0324723	0.0614988
Ak6	0.0629721	-0.0372585	0.100231	0.521376	0.605519
Taf9	-0.0411182	0.0243283	-0.0654465	0.673988	0.739864
Mrps36	0.211015	-0.124851	0.335866	0.022525	0.0453011
Mast4	-0.517945	0.306451	-0.824396	4.21574e-09	9.05102e-08
Srek1	-0.299092	0.176963	-0.476055	0.000914064	0.0030256
Srek1ip1	-0.104021	0.0615459	-0.165567	0.278426	0.366395
Gpbp1	-0.0264074	0.0156244	-0.0420318	0.789819	0.834312
Il6st	-0.323959	0.191676	-0.515635	0.000969165	0.00319168
Plpp1	0.0639441	-0.0378336	0.101778	0.5083	0.59317
Dhx29	0.0191344	-0.0113212	0.0304555	0.843382	0.878655
Snx18	-0.365818	0.216442	-0.58226	5.42178e-05	0.00027943
Hspb3	0.17999	-0.106494	0.286484	0.0634727	0.106823
Ndufs4	0.255886	-0.151399	0.407286	0.00856447	0.0201829
Mocs2	0.0735418	-0.0435122	0.117054	0.452305	0.53949
Itga1	-0.261461	0.154698	-0.416159	0.00730791	0.0175625
Zfp131	-0.0878201	0.0519602	-0.13978	0.365306	0.455431
Pdhb	0.208127	-0.123142	0.331269	0.0283685	0.0548257
Thoc7	-0.154817	0.0915999	-0.246417	0.0821611	0.133143
Psmd6	0.0994431	-0.0588371	0.15828	0.312036	0.402447
Ngly1	0.218613	-0.129346	0.34796	0.0362049	0.0671241
Top2b	-0.0389115	0.0230227	-0.0619342	0.669015	0.735831
Nr1d2	-0.199408	0.117983	-0.317391	0.0294507	0.0566562
Ube2e1	-0.0306443	0.0181312	-0.0487756	0.748014	0.80165
Rtraf	-0.28576	0.169075	-0.454835	0.00264594	0.00742393
Ecd	-0.283791	0.16791	-0.451701	0.00189408	0.00562692
Fam149b	0.120316	-0.0711869	0.191503	0.241509	0.326543
Dnajc9	-0.169334	0.10019	-0.269524	0.0511549	0.0890628
Mrps16	-0.026998	0.0159738	-0.0429718	0.784262	0.82988
Anxa7	-0.0574762	0.0340068	-0.091483	0.554373	0.633989
Mss51	0.0460888	-0.0272692	0.073358	0.636392	0.707071
Ppp3cb	-0.555009	0.32838	-0.883389	2.36763e-10	6.91774e-09
Myoz1	-0.199118	0.117812	-0.31693	0.0343971	0.0644178
Synpo2l	-0.532496	0.31506	-0.847556	2.94991e-09	6.47647e-08
Sec24c	-0.19552	0.115683	-0.311203	0.0383357	0.0703365
Chchd1	0.5379	-0.318258	0.856158	1.51158e-07	1.88269e-06
Camk2g	-0.270939	0.160305	-0.431244	0.00426883	0.0111184
Vcl	-0.269783	0.159621	-0.429404	0.00462524	0.011945
Ap3m1	-0.120346	0.0712045	-0.19155	0.214705	0.297768
Adk	0.25306	-0.149727	0.402788	0.0126897	0.0279616
Dupd1	-0.134553	0.0796106	-0.214164	0.179532	0.255836
Vdac2	-0.0677668	0.0400954	-0.107862	0.463895	0.550946
Zfp503	-0.23241	0.137509	-0.36992	0.014468	0.0311482
Zmiz1	-0.576045	0.340826	-0.916871	9.4289e-12	3.93986e-10
Ppif	-0.211279	0.125007	-0.336285	0.0227885	0.0457417
Zcchc24	-0.315676	0.186775	-0.50245	0.0007272	0.00249638
Anxa11	-0.701922	0.415304	-1.11723	1.18953e-16	1.65089e-14
Arf4	-0.0597003	0.0353227	-0.095023	0.516533	0.601693
Asb14	0.0090024	-0.00532642	0.0143288	0.923794	0.94148
Appl1	-0.0734459	0.0434555	-0.116901	0.443659	0.53097
Lrtm1	-0.285523	0.168935	-0.454458	0.00247454	0.0070088
Selenok	0.108313	-0.0640852	0.172398	0.26336	0.350967
Mustn1	0.223479	-0.132225	0.355704	0.0180184	0.0375734
Spcs1	0.306828	-0.18154	0.488368	0.00141675	0.00433163
Pbrm1	-0.224026	0.132549	-0.356575	0.0153891	0.0328401
Smim4	0.358898	-0.212348	0.571246	0.000256642	0.00103241
Nisch	-0.405408	0.239867	-0.645275	6.30313e-06	4.38175e-05
Bap1	-0.258211	0.152775	-0.410986	0.00670584	0.0162766
Sh3bp5	-0.490006	0.28992	-0.779927	6.91816e-08	9.56725e-07
Ankrd28	-0.15989	0.0946014	-0.254491	0.0954568	0.150852
Dph3	-0.10686	0.0632254	-0.170085	0.269576	0.357775
Timm23	0.16746	-0.0990808	0.266541	0.0853424	0.137098
3425401B19Rik	-0.583616	0.345306	-0.928922	2.69663e-11	9.79355e-10
Glud1	-0.238533	0.141132	-0.379664	0.0135664	0.0295345
Sncg	0.109373	-0.0647122	0.174085	0.25952	0.346562
Mmrn2	-0.291052	0.172206	-0.463258	0.00304214	0.0083605
Bmpr1a	-0.0167009	0.00988138	-0.0265823	0.8689	0.897779
Ldb3	-0.0893456	0.0528628	-0.142208	0.363579	0.453569
Wapl	-0.240691	0.142409	-0.3831	0.0103955	0.0238611
Ccser2	-0.15647	0.0925781	-0.249048	0.10237	0.16002
Ghitm	0.14117	-0.0835257	0.224696	0.144078	0.212481
Psmc6	0.120283	-0.0711672	0.19145	0.217271	0.300468
Fermt2	-0.182386	0.107912	-0.290298	0.0577249	0.0984287
Ubb-ps	0.18745	-0.110908	0.298358	0.0483691	0.0850207
Cnih1	-0.313784	0.185655	-0.499439	0.000555945	0.00200037
Gmfb	0.0295675	-0.0174941	0.0470616	0.753104	0.805496
Cgrrf1	0.250086	-0.147968	0.398054	0.0121743	0.0271234
Samd4	-0.160868	0.0951803	-0.256048	0.0957426	0.151242
Lgals3	-0.169944	0.10055	-0.270494	0.0542321	0.0936233
Ktn1	-0.224802	0.133008	-0.35781	0.0173658	0.0363989
Exoc5	-0.300755	0.177947	-0.478702	0.000738439	0.00253014
Klhl33	-0.275201	0.162827	-0.438028	0.00419633	0.0109811
Apex1	-0.0509452	0.0301426	-0.0810878	0.592652	0.668712
Pnp	-0.130203	0.0770368	-0.20724	0.154399	0.225541
Rnase4	-0.208226	0.1232	-0.331427	0.0247514	0.0489486
Ndrg2	-0.534539	0.316269	-0.850808	4.29678e-09	9.16388e-08
Hnrnpc	-0.0171545	0.0101497	-0.0273042	0.848829	0.882288
Supt16	-0.278372	0.164704	-0.443076	0.00231031	0.00663552
Tox4	-0.284045	0.16806	-0.452104	0.00377295	0.0100906
Dad1	0.256723	-0.151894	0.408617	0.00547037	0.0137681
Abhd4	-0.286774	0.169675	-0.456449	0.00230168	0.00661895
Oxa1l	-0.0645223	0.0381757	-0.102698	0.510002	0.594798
Psmb5	-0.00548658	0.00324623	-0.00873281	0.954637	0.965113
Acin1	-0.557083	0.329608	-0.886691	1.70283e-10	5.12962e-09
Pabpn1	-0.455443	0.26947	-0.724913	4.18553e-08	6.40353e-07
Dcaf11	-0.185338	0.109658	-0.294996	0.0563566	0.0965321
Fitm1	0.0719827	-0.0425898	0.114572	0.44384	0.531023
Psme1	-0.307065	0.18168	-0.488744	0.000601206	0.00212007
Emc9	0.0263633	-0.0155983	0.0419615	0.773065	0.8208
Nedd8	-0.0117047	0.00692529	-0.01863	0.895528	0.919138
Dhrs1	0.00272358	-0.00161145	0.00433503	0.977007	0.981371
Nop9	-0.280053	0.165698	-0.445752	0.00106228	0.00343145
Adcy4	-0.147807	0.0874524	-0.235259	0.105935	0.163683
Sdr39u1	0.12065	-0.0713847	0.192035	0.224907	0.308829
Mphosph8	-0.148447	0.0878314	-0.236279	0.105669	0.163467
Eef1akmt1	-0.0648096	0.0383457	-0.103155	0.490144	0.574608
Sap18	0.205766	-0.121745	0.327511	0.0308338	0.0589044
Mrpl57	-0.119418	0.0706556	-0.190074	0.206077	0.287857
Micu2	-0.289757	0.171439	-0.461196	0.00196369	0.00577224
Cdadc1	0.0984622	-0.0582568	0.156719	0.346287	0.437333
Mtmr6	-0.110963	0.065653	-0.176616	0.226735	0.31101
Mipep	-0.0312027	0.0184616	-0.0496643	0.756796	0.807942
Sgcg	0.243646	-0.144157	0.387804	0.0168746	0.0355418
Kpna3	-0.00125489	0.000742476	-0.00199737	0.989421	0.990695
Spryd7	0.164036	-0.0970546	0.261091	0.0738154	0.121648
Ints6	-0.101383	0.0599848	-0.161367	0.279251	0.367108
Ctsb	-0.212665	0.125827	-0.338492	0.0147263	0.0316342
Fdft1	-0.149868	0.0886722	-0.238541	0.126631	0.190289
Sox7	-0.217319	0.128581	-0.3459	0.0282107	0.0546431
Extl3	-0.301085	0.178142	-0.479226	0.00126135	0.00394338
Elp3	-0.0690504	0.0408548	-0.109905	0.487264	0.572224
Ccdc25	-0.371363	0.219723	-0.591086	4.57412e-05	0.000240203
Scara3	-0.151819	0.089826	-0.241645	0.0908356	0.144312
Clu	-0.193992	0.114779	-0.308771	0.0464967	0.0820555
Ephx2	0.0860764	-0.0509285	0.137005	0.384626	0.474193
Trim35	-0.134029	0.0793006	-0.21333	0.160214	0.232571
Dpysl2	-0.200001	0.118334	-0.318335	0.0337338	0.063451
Bnip3l	-0.105122	0.0621974	-0.16732	0.273338	0.361535
Ppp2r2a	-0.152465	0.0902083	-0.242673	0.10716	0.165026
Entpd4	-0.352155	0.208359	-0.560514	0.000217016	0.000898109
Entpd4b	-0.354849	0.209952	-0.564801	0.000194242	0.000828565
Fam160b2	-0.176716	0.104557	-0.281273	0.0590748	0.100554
Xpo7	-0.229383	0.135719	-0.365102	0.0118227	0.0265135
Rcbtb2	-0.172241	0.101909	-0.27415	0.0702713	0.116948
Itm2b	-0.0582091	0.0344404	-0.0926494	0.530999	0.614126
Sucla2	0.194728	-0.115214	0.309941	0.0388574	0.071099
Esd	0.0565119	-0.0334362	0.0899482	0.550107	0.630781
Lcp1	-0.112317	0.0664542	-0.178771	0.254908	0.341459
Tpt1	-0.375965	0.222446	-0.598412	0.00012993	0.000592415
Tsc22d1	-0.417954	0.24729	-0.665244	1.86081e-06	1.60048e-05
Dnajc15	0.265147	-0.156879	0.422026	0.0079762	0.0189343
Vwa8	-0.378638	0.224028	-0.602666	3.78538e-05	0.000203739
Wbp4	-0.0321387	0.0190154	-0.0511541	0.715869	0.775538
Sugt1	-0.14335	0.0848153	-0.228165	0.126584	0.190289
Klf5	-0.17041	0.100826	-0.271236	0.0576362	0.0983205
Uchl3	-0.0327015	0.0193484	-0.0520499	0.739847	0.79553
Lmo7	-0.309588	0.183173	-0.492762	0.00104361	0.00338847
Mycbp2	-0.0189944	0.0112384	-0.0302328	0.843856	0.878677
Gpr180	-0.226552	0.134043	-0.360595	0.0165874	0.0350318
Mbnl2	-0.110775	0.0655416	-0.176316	0.245313	0.330658
Ipo5	-0.10604	0.0627401	-0.16878	0.255235	0.34178
Stk24	-0.293462	0.173632	-0.467094	0.0014243	0.00435127
Tm9sf2	-0.222869	0.131864	-0.354733	0.0164807	0.0348254
Clybl	-0.0618881	0.0366172	-0.0985053	0.509202	0.594044
Pcca	0.0252823	-0.0149587	0.040241	0.797808	0.841325
Selenop	-0.0662363	0.0391898	-0.105426	0.487406	0.572224
Ghr	-0.254581	0.150627	-0.405208	0.00447163	0.0116077
AW549877	0.0891779	-0.0527636	0.141941	0.359078	0.449397
Oxct1	-0.0686327	0.0406077	-0.10924	0.485284	0.570422
Ttc33	0.216199	-0.127918	0.344116	0.0243499	0.0482282
Dab2	-0.0834655	0.0493837	-0.132849	0.359281	0.449506
Egflam	0.00426948	-0.00252611	0.00679558	0.964732	0.973247
Wdr70	-0.210084	0.1243	-0.334384	0.0259331	0.050897
Nup155	-0.0802179	0.0474622	-0.12768	0.426491	0.514654
Nipbl	-0.171032	0.101194	-0.272226	0.0830374	0.134172
Lmbrd2	-0.36768	0.217544	-0.585225	3.54221e-05	0.000193058
Adamts12	-0.292891	0.173294	-0.466184	0.000917178	0.00303332
Tars	-0.0585641	0.0346504	-0.0932144	0.533503	0.615922
Sub1	0.0601625	-0.0355961	0.0957586	0.519646	0.604247
Zfr	-0.10913	0.0645685	-0.173698	0.246825	0.332005
Golph3	0.0169876	-0.010051	0.0270386	0.863159	0.893272
Retreg1	-0.111421	0.0659241	-0.177345	0.250543	0.336191
Zfp622	-0.343563	0.203275	-0.546838	0.000257201	0.00103359
Ank	-0.240265	0.142157	-0.382422	0.00968533	0.0223631
Marchf6	-0.444835	0.263194	-0.70803	1.08166e-06	1.02271e-05
Cmbl	-0.107836	0.063803	-0.171639	0.270744	0.358716
Cct5	-0.133357	0.078903	-0.21226	0.140869	0.20846
Cpq	-0.101379	0.0599824	-0.161361	0.288105	0.376455
Mtdh	-0.433052	0.256222	-0.689274	1.41822e-06	1.28834e-05
Cox6c	0.491721	-0.290935	0.782655	3.5556e-07	3.98186e-06
Polr2k	0.291507	-0.172475	0.463982	0.00244754	0.00693737
Rnf19a	-0.11053	0.0653972	-0.175928	0.241588	0.326543
Ankrd46	-0.121528	0.0719041	-0.193432	0.186	0.263895
Pabpc1	-0.25914	0.153325	-0.412465	0.00218375	0.00629529
Ywhaz	-0.10546	0.0623969	-0.167857	0.23063	0.314871
Zfp706	-0.303417	0.179522	-0.482939	0.000620876	0.00217363
Azin1	-0.0950925	0.0562631	-0.151356	0.287766	0.376186
Atp6v1c1	-0.167592	0.0991585	-0.26675	0.0621055	0.104749
Fzd6	0.302341	-0.178885	0.481226	0.00364203	0.00977065
Dcaf13	-0.0968164	0.057283	-0.154099	0.300757	0.390361
Oxr1	0.0166297	-0.00983921	0.0264689	0.860022	0.8905
Abra	0.115908	-0.0685792	0.184488	0.224374	0.308315
Eif3e	0.195915	-0.115916	0.311831	0.041062	0.0742172
Emc2	0.306402	-0.181288	0.48769	0.00100478	0.00328237
Eny2	0.0392269	-0.0232093	0.0624362	0.688821	0.752321
Eif3h	-0.219839	0.130071	-0.34991	0.0179572	0.0374945
Rad21	-0.220687	0.130573	-0.35126	0.0175193	0.0366219
Deptor	-0.214693	0.127027	-0.34172	0.0180406	0.0375884
Col14a1	-0.128895	0.0762628	-0.205158	0.202139	0.283067
Mrpl13	-0.137462	0.0813317	-0.218794	0.142102	0.209884
Derl1	0.0103011	-0.0060948	0.0163959	0.913006	0.932442
Fbxo32	-0.460091	0.27222	-0.732311	8.85026e-07	8.55525e-06
Fam91a1	-0.272763	0.161385	-0.434148	0.0022354	0.0064394
Tmem65	-0.311829	0.184499	-0.496328	0.00116447	0.00369397
Rnf139	-0.0288308	0.0170582	-0.0458891	0.765265	0.814968
Tatdn1	-0.0539141	0.0318992	-0.0858133	0.570146	0.648402
Ndufb9	0.231518	-0.136982	0.3685	0.0108206	0.0246766
Asap1	-0.348649	0.206284	-0.554934	0.00012005	0.000554053
Efr3a	-0.173737	0.102794	-0.276531	0.0581714	0.0991466
Phf20l1	-0.105398	0.0623607	-0.167759	0.298501	0.387822
St3gal1	-0.258424	0.152901	-0.411324	0.0018627	0.00554247
Trappc9	-0.226297	0.133892	-0.360189	0.0121427	0.0270721
Ago2	-0.621875	0.367943	-0.989818	1.28367e-12	6.47834e-11
Ptk2	-0.269284	0.159327	-0.428611	0.00390357	0.0103757
Ptp4a3	-0.0840351	0.0497208	-0.133756	0.351147	0.441461
Ndufb4c	0.660666	-0.390894	1.05156	1.4011e-12	6.98038e-11
Lynx1	-0.0834314	0.0493636	-0.132795	0.406251	0.495353
Ly6e	-0.204741	0.121139	-0.32588	0.0221457	0.0446592
Ly6a	-0.347363	0.205523	-0.552886	9.27681e-05	0.000443961
Ly6c1	0.0866078	-0.051243	0.137851	0.34524	0.436612
Gpihbp1	-0.132249	0.0782474	-0.210497	0.173355	0.248307
Mafa	-0.154151	0.0912059	-0.245357	0.124767	0.187904
Eef1d	-0.435792	0.257844	-0.693636	7.52682e-07	7.53846e-06
Tsta3	-0.190192	0.11253	-0.302722	0.0385595	0.0707137
Puf60	-0.273006	0.161529	-0.434535	0.00274971	0.00767629
Plec	-0.648754	0.383846	-1.0326	2.03365e-12	9.87845e-11
Grina	-0.410272	0.242744	-0.653016	7.80346e-06	5.24641e-05
Oplah	-0.316022	0.18698	-0.503002	0.000461559	0.0016985
Cyc1	-0.23605	0.139663	-0.375713	0.0120672	0.0269345
Maf1	-0.359699	0.212822	-0.572521	0.000121575	0.000559764
Hsf1	-0.182428	0.107937	-0.290365	0.0500679	0.0874445
Vps28	-0.154312	0.0913012	-0.245613	0.111659	0.17083
Cyhr1	-0.297931	0.176276	-0.474207	0.00213833	0.00618611
Mb	0.104656	-0.0619216	0.166578	0.28676	0.375202
Rbfox2	-0.486086	0.287601	-0.773687	2.67346e-08	4.31081e-07
Myh9	-0.388233	0.229705	-0.617938	7.58097e-06	5.12342e-05
Txn2	0.00983329	-0.00581803	0.0156513	0.921401	0.939781
Eif3d	-0.477267	0.282383	-0.75965	2.98836e-08	4.77892e-07
Pvalb	-0.0887861	0.0525318	-0.141318	0.340108	0.430929
Kctd17	-0.279814	0.165556	-0.44537	0.00266929	0.00747324
C1qtnf6	-0.358805	0.212293	-0.571097	1.71103e-05	0.000103246
Card10	-0.117394	0.069458	-0.186852	0.247731	0.333108
Lgals1	0.230783	-0.136547	0.36733	0.0154876	0.0329599
H1f0	-0.493423	0.291942	-0.785365	3.085e-08	4.89318e-07
Eif3l	0.161015	-0.0952673	0.256282	0.0909775	0.144433
Micall1	-0.368547	0.218057	-0.586605	2.17977e-05	0.000126995
Polr2f	-0.223135	0.132022	-0.355157	0.01848	0.0384028
Ddx17	-0.397369	0.23511	-0.632479	9.58677e-06	6.24024e-05
Tomm22	-0.00417501	0.00247021	-0.00664523	0.965087	0.973305
Gtpbp1	-0.333393	0.197258	-0.530651	0.000245317	0.000996134
Sun2	-0.284723	0.168461	-0.453184	0.00265677	0.00744894
Cbx6	-0.388543	0.229888	-0.618431	3.71875e-05	0.000200709
Pdgfb	-0.410826	0.243072	-0.653899	2.36261e-06	1.92881e-05
Syngr1	-0.083597	0.0494615	-0.133059	0.375181	0.465057
Atf4	-0.361167	0.21369	-0.574857	5.11851e-05	0.000265207
Tnrc6b	-0.345732	0.204558	-0.55029	4.53837e-05	0.000238972
Adsl	0.0564662	-0.0334092	0.0898753	0.553577	0.633264
St13	-0.256334	0.151665	-0.407999	0.00608762	0.0150678
Rbx1	-0.0211501	0.0125138	-0.033664	0.822508	0.86269
Tef	-0.303706	0.179693	-0.483399	0.00148155	0.00449845
Tob2	-0.216456	0.12807	-0.344526	0.0170449	0.0357951
Phf5a	0.0443146	-0.0262195	0.0705341	0.629295	0.700442
Aco2	-0.0336798	0.0199272	-0.0536071	0.726099	0.784219
Xrcc6	-0.125767	0.0744121	-0.200179	0.168254	0.242611
Snu13	0.222045	-0.131377	0.353422	0.0253773	0.0500082
Ccdc134	-0.115495	0.0683347	-0.18383	0.232679	0.316261
Smdt1	-0.305909	0.180996	-0.486906	0.000689074	0.00238445
Ndufa6	0.410699	-0.242997	0.653696	8.04071e-06	5.35955e-05
Nfam1	-0.311503	0.184306	-0.495809	0.000563729	0.00201903
Cyb5r3	-0.23932	0.141598	-0.380918	0.00839318	0.0198032
Tspo	-0.19418	0.11489	-0.30907	0.0340079	0.0638336
Samm50	-0.112586	0.0666133	-0.179199	0.245147	0.330549
Parvb	-0.476936	0.282187	-0.759122	1.44784e-07	1.81494e-06
Nup50	-0.390808	0.231228	-0.622036	1.12168e-05	7.13399e-05
5031439G07Rik	-0.360795	0.21347	-0.574265	7.15688e-05	0.000353388
Atxn10	-0.114066	0.0674892	-0.181555	0.197106	0.27762
Tbc1d22a	-0.176286	0.104302	-0.280588	0.0559592	0.0960077
Mapk12	-0.184702	0.109282	-0.293984	0.0526972	0.0913388
Zcrb1	-0.526914	0.311757	-0.838671	2.18519e-08	3.66019e-07
Tmem117	0.0333417	-0.0197272	0.0530689	0.741471	0.796395
Ano6	-0.411328	0.243369	-0.654697	4.30366e-06	3.17963e-05
Arid2	-0.122633	0.0725576	-0.19519	0.178671	0.254982
Scaf11	-0.314224	0.185916	-0.50014	0.000559474	0.00200935
Slc38a2	-0.410859	0.243091	-0.65395	1.2656e-05	7.9197e-05
Slc38a4	-0.124114	0.073434	-0.197548	0.175613	0.251263
Slc48a1	-0.216784	0.128264	-0.345047	0.0241408	0.0478872
Pfkm	-0.69674	0.412238	-1.10898	2.95707e-15	2.61163e-13
Asb8	-0.0515594	0.030506	-0.0820653	0.591719	0.668048
Ccnt1	-0.308262	0.182388	-0.49065	0.00106691	0.00344138
Arf3	-0.399557	0.236404	-0.635961	7.67008e-06	5.17464e-05
Prkag1	-0.413301	0.244536	-0.657837	4.17791e-06	3.11381e-05
Kmt2d	-0.356339	0.210834	-0.567172	8.9105e-05	0.00042785
Tuba1b	-0.149879	0.0886782	-0.238557	0.105826	0.16358
Tuba1a	-0.180102	0.10656	-0.286662	0.0495793	0.0867079
Tuba1c	-0.251266	0.148666	-0.399932	0.00418845	0.0109753
1700120C14Rik	-0.371514	0.219812	-0.591326	7.02214e-05	0.000347618
Tmbim6	-0.392027	0.231949	-0.623976	6.582e-06	4.55118e-05
Smarcd1	-0.32991	0.195197	-0.525107	0.000202737	0.000851715
Gpd1	-0.522535	0.309167	-0.831702	1.92142e-08	3.30626e-07
Cox14	-0.128801	0.0762071	-0.205008	0.161868	0.234621
Larp4	-0.321892	0.190453	-0.512344	0.000199715	0.00084358
Slc11a2	-0.218775	0.129442	-0.348217	0.0196266	0.0403753
Dazap2	-0.289622	0.17136	-0.460982	0.00121294	0.00382899
Atg101	-0.0988447	0.0584831	-0.157328	0.313325	0.403841
Eif4b	-0.515445	0.304972	-0.820417	6.91347e-10	1.76748e-08
Igfbp6	-0.0888853	0.0525905	-0.141476	0.352059	0.44243
Rarg	-0.344729	0.203965	-0.548694	0.000106979	0.000502076
Mfsd5	-0.101048	0.0597866	-0.160834	0.276535	0.364647
Pfdn5	0.186079	-0.110097	0.296176	0.0575675	0.0982464
Sp1	-0.159661	0.0944658	-0.254126	0.0847087	0.136306
Amhr2	-0.0040765	0.00241193	-0.00648843	0.966843	0.974113
Prr13	-0.3063	0.181227	-0.487527	0.000909141	0.00301701
Pcbp2	-0.72442	0.428615	-1.15303	2.59532e-16	3.15169e-14
Atf7	-0.413796	0.24483	-0.658626	4.88087e-06	3.51894e-05
Atp5g2	0.048513	-0.0287035	0.0772166	0.633719	0.704616
Calcoco1	-0.269953	0.159722	-0.429675	0.00419255	0.0109786
Hoxc10	-0.372353	0.220309	-0.592662	6.08887e-05	0.000308943
Cbx5	-0.161403	0.0954968	-0.2569	0.092404	0.146444
Copz1	-0.21569	0.127617	-0.343306	0.0163948	0.0346815
Naa60	-0.285339	0.168825	-0.454164	0.00195345	0.00575084
Trap1	0.0593712	-0.0351279	0.0944991	0.564325	0.642579
Srl	-0.453011	0.268032	-0.721043	1.41896e-06	1.28834e-05
Pam16	0.290715	-0.172006	0.462721	0.0023409	0.00670357
Dnaja3	-0.265694	0.157202	-0.422897	0.00243305	0.00690637
Hmox2	-0.150508	0.0890504	-0.239558	0.105449	0.163452
Cdip1	-0.289322	0.171182	-0.460504	0.00106837	0.00344138
Ubald1	-0.326123	0.192956	-0.519079	0.000521533	0.00188514
Mgrn1	-0.2355	0.139337	-0.374837	0.00870691	0.0204416
Glyr1	-0.342923	0.202896	-0.545819	0.000214639	0.000891118
Rbfox1	-0.238662	0.141208	-0.37987	0.0136369	0.0296714
Mettl22	0.343001	-0.202942	0.545944	0.000616886	0.00216189
Usp7	-0.280935	0.16622	-0.447154	0.00278155	0.00774291
1810013L24Rik	-0.0778851	0.046082	-0.123967	0.425243	0.513835
Dexi	-0.273589	0.161873	-0.435462	0.00451328	0.0117002
Litaf	-0.249024	0.147339	-0.396363	0.00753198	0.0179897
Rsl1d1	-0.13219	0.0782124	-0.210402	0.167765	0.242084
Gspt1	-0.0256615	0.015183	-0.0408445	0.781658	0.827534
Mrtfb	-0.514036	0.304138	-0.818174	7.21861e-09	1.46102e-07
2310015D24Rik	-0.0935903	0.0553742	-0.148965	0.319086	0.409501
Bfar	-0.191971	0.113583	-0.305553	0.0353441	0.065874
Ntan1	0.35802	-0.211828	0.569848	0.000294632	0.00116593
Pdxdc1	-0.179823	0.106395	-0.286218	0.0487363	0.0855031
Myh11	-0.0964391	0.0570598	-0.153499	0.295998	0.385343
Fopnl	0.0080368	-0.00475511	0.0127919	0.934849	0.949758
Abcc1	0.0213535	-0.0126342	0.0339877	0.825763	0.865637
Dnm1l	-0.24587	0.145473	-0.391343	0.00874284	0.0204914
Mapk1	0.054995	-0.0325387	0.0875337	0.552616	0.632724
Ube2l3	-0.146672	0.0867806	-0.233452	0.11059	0.169662
Dgcr2	-0.278967	0.165055	-0.444022	0.00366893	0.00983274
Dgcr6	-0.340583	0.201512	-0.542095	0.00019609	0.000834618
Tango2	-0.176307	0.104315	-0.280622	0.0492848	0.0862706
Tbx1	-0.35428	0.209616	-0.563896	8.14917e-05	0.000396341
Ufd1	-0.134599	0.079638	-0.214237	0.151775	0.222146
Klhl24	-0.29923	0.177044	-0.476274	0.00191325	0.00567115
Parl	-0.448341	0.265268	-0.713609	5.33504e-07	5.60324e-06
Abcc5	-0.244491	0.144657	-0.389148	0.00774404	0.0184622
Dvl3	-0.426724	0.252478	-0.679202	2.0013e-06	1.67609e-05
Ap2m1	-0.408671	0.241797	-0.650467	2.03666e-06	1.70203e-05
Psmd2	-0.378807	0.224127	-0.602934	3.01809e-05	0.000167787
Eif4g1	-0.573054	0.339057	-0.912111	1.34026e-11	5.26086e-10
Fam131a	-0.217792	0.12886	-0.346652	0.0193628	0.0399171
Tra2b	-0.0677196	0.0400674	-0.107787	0.469057	0.555549
Etv5	-0.161009	0.0952634	-0.256272	0.0743933	0.122445
Eif4a2	-0.0685702	0.0405707	-0.109141	0.475557	0.561961
Bcl6	-0.335675	0.198608	-0.534282	0.000319493	0.00125156
Lpp	-0.427487	0.25293	-0.680416	5.1642e-07	5.45291e-06
Ccdc50	-0.0492616	0.0291465	-0.0784081	0.610349	0.683717
Plaat1	-0.0821441	0.0486019	-0.130746	0.405945	0.495136
Opa1	-0.220327	0.13036	-0.350688	0.0243211	0.0481956
Hes1	-0.215099	0.127267	-0.342366	0.0258001	0.0507129
Ppp1r2	-0.149001	0.0881592	-0.237161	0.123282	0.185977
Apod	-0.0485475	0.028724	-0.0772715	0.612571	0.685416
Dlg1	-0.219671	0.129972	-0.349643	0.0241038	0.0478383
0610012G03Rik	0.125406	-0.0741983	0.199604	0.201499	0.282579
Ncbp2	-0.069091	0.0408788	-0.10997	0.447497	0.535069
Pigx	0.0606151	-0.0358639	0.096479	0.529617	0.613616
Nrros	-0.237139	0.140307	-0.377446	0.00685073	0.0165766
Smco1	-0.0736362	0.0435681	-0.117204	0.456123	0.54371
Pcyt1a	-0.234989	0.139035	-0.374024	0.0116348	0.0261801
Tfrc	-0.0185584	0.0109804	-0.0295389	0.850657	0.883628
Tnk2	-0.29438	0.174175	-0.468554	0.00139772	0.00429372
Fyttd1	-0.187912	0.111181	-0.299093	0.0427212	0.0767875
Heg1	-0.154233	0.0912548	-0.245488	0.109031	0.167469
Itgb5	-0.223104	0.132003	-0.355108	0.0119123	0.02665
Mylk	-0.121636	0.0719679	-0.193604	0.217142	0.300468
Sec22a	0.0602484	-0.035647	0.0958953	0.530373	0.613767
Slc49a4	-0.332342	0.196636	-0.528978	0.000202536	0.000851715
Kpna1	0.0842604	-0.0498541	0.134114	0.39627	0.484552
Fam162a	0.286325	-0.169409	0.455734	0.00353532	0.00952722
Golgb1	-0.384297	0.227376	-0.611673	1.30871e-05	8.16313e-05
Fbxo40	-0.497536	0.294375	-0.791911	4.59695e-08	6.84435e-07
Rabl3	-0.206504	0.122181	-0.328685	0.0331061	0.0624517
Ndufb4	0.472552	-0.279593	0.752145	6.48388e-07	6.5959e-06
Fstl1	-0.439761	0.260192	-0.699953	9.12254e-08	1.21684e-06
Lrrc58	-0.21555	0.127534	-0.343084	0.015479	0.0329599
Gsk3b	-0.323076	0.191154	-0.51423	0.00063637	0.00222386
Cox17	0.290668	-0.171978	0.462646	0.00212656	0.00616704
Popdc2	-0.28418	0.16814	-0.452319	0.00265962	0.00745155
Adprh	-0.448286	0.265236	-0.713522	8.19291e-07	8.03981e-06
Zbtb20	-0.394522	0.233426	-0.627948	7.22798e-06	4.91047e-05
Atp6v1a	-0.0330335	0.0195448	-0.0525783	0.713955	0.774378
Naa50	-0.216146	0.127886	-0.344032	0.0264692	0.0518444
Usf3	-0.115814	0.0685235	-0.184338	0.218524	0.301878
Ccdc80	-0.112849	0.0667688	-0.179617	0.246004	0.331256
Retnla	-0.0272977	0.0161511	-0.0434488	0.78175	0.827534
Cd47	-0.307626	0.182012	-0.489638	0.00082132	0.00276343
Pcnp	-0.135876	0.0803932	-0.216269	0.148141	0.217647
Tfg	-0.155104	0.0917701	-0.246874	0.0890917	0.141948
Tomm70a	-0.0874134	0.0517196	-0.139133	0.361402	0.452014
Tbc1d23	-0.121304	0.0717714	-0.193075	0.204078	0.285269
Cmss1	-0.125125	0.0740322	-0.199157	0.170454	0.244776
St3gal6	-0.0282705	0.0167267	-0.0449972	0.761956	0.811835
Cldnd1	-0.00805364	0.00476507	-0.0128187	0.933066	0.94869
Arl6	0.251252	-0.148657	0.399909	0.0104254	0.0239015
4930453N24Rik	-0.245043	0.144984	-0.390026	0.00836182	0.0197598
Cggbp1	-0.345201	0.204244	-0.549445	6.1749e-05	0.000312851
Gbe1	0.0596951	-0.0353196	0.0950147	0.553474	0.633264
Hspa13	-0.149479	0.0884416	-0.23792	0.112333	0.171591
Nrip1	-0.327911	0.194014	-0.521926	0.000195286	0.000832108
Usp25	-0.13446	0.0795554	-0.214015	0.144382	0.212849
Mrpl39	0.0121174	-0.00716944	0.0192868	0.901147	0.922995
Jam2	-0.0373375	0.0220913	-0.0594288	0.709776	0.77066
Atp5j	0.644623	-0.381402	1.02602	9.77159e-12	4.03962e-10
App	-0.210475	0.124531	-0.335006	0.036371	0.0672803
Adamts5	-0.358341	0.212018	-0.570359	0.000124988	0.000573442
Ltn1	-0.278061	0.16452	-0.442581	0.00480686	0.0123134
Usp16	-0.271144	0.160427	-0.431572	0.00439457	0.0114382
Cct8	-0.00704094	0.00416589	-0.0112068	0.939926	0.954666
Sod1	0.190786	-0.112882	0.303668	0.0513041	0.0892824
Ifngr2	-0.110613	0.0654462	-0.176059	0.245763	0.331149
Tmem50b	-0.235605	0.1394	-0.375004	0.00882222	0.0206401
Gart	-0.0569049	0.0336687	-0.0905737	0.53256	0.615382
Son	-0.442029	0.261534	-0.703562	1.17399e-06	1.09403e-05
Atp5o	0.282508	-0.16715	0.449658	0.0031926	0.00873692
Itsn1	-0.321601	0.19028	-0.511881	0.000261537	0.00104993
Mrps6	-0.173352	0.102567	-0.275919	0.0597063	0.101274
Smim11	0.0296032	-0.0175152	0.0471184	0.758091	0.809102
Rcan1	-0.241755	0.143038	-0.384793	0.00951311	0.022031
Pigp	0.385589	-0.22814	0.61373	3.4842e-05	0.000191237
Ttc3	-0.0700211	0.0414291	-0.11145	0.464387	0.551362
Dyrk1a	-0.418602	0.247673	-0.666275	2.04583e-05	0.000120639
Hmgn1	-0.173838	0.102854	-0.276692	0.0604484	0.102349
Sh3bgr	0.277527	-0.164204	0.441731	0.00464897	0.0119721
C2cd2	-0.437572	0.258897	-0.696468	1.47939e-06	1.33386e-05
Arid1b	-0.414462	0.245223	-0.659685	4.49937e-06	3.2804e-05
Tmem242	-0.250231	0.148053	-0.398284	0.00549422	0.0137923
Snx9	-0.203465	0.120383	-0.323848	0.0309303	0.059004
Gtf2h5	0.0693105	-0.0410087	0.110319	0.466432	0.553115
Tulp4	-0.185367	0.109675	-0.295042	0.0491268	0.0860715
Dynlt1a	-0.0138013	0.0081658	-0.0219671	0.880512	0.907605
Fgfr1op	-0.337901	0.199925	-0.537826	0.000292299	0.00115906
Mpc1	0.451927	-0.26739	0.719316	1.71464e-06	1.50069e-05
Qk	-0.137677	0.0814587	-0.219135	0.127756	0.191758
Igf2r	-0.256435	0.151724	-0.408158	0.0101146	0.0232713
Mrpl18	0.232822	-0.137753	0.370574	0.023192	0.0464796
Tcp1	-0.102623	0.0607187	-0.163342	0.265381	0.353417
Sod2	0.22142	-0.131007	0.352427	0.0276902	0.0537752
Smoc2	-0.178376	0.105539	-0.283915	0.064465	0.108352
Psmb1	0.0808933	-0.0478619	0.128755	0.39023	0.47947
Rgmb	-0.412329	0.243962	-0.656291	1.58068e-05	9.6278e-05
Oaz1-ps	0.0319503	-0.0189039	0.0508542	0.735108	0.790872
Lnpep	-0.109054	0.0645234	-0.173577	0.264728	0.352668
Ppp2r1a	-0.320305	0.189514	-0.509818	0.000453787	0.00167625
Hcfc1r1	-0.0448186	0.0265177	-0.0713363	0.6308	0.701772
Flywch1	-0.272037	0.160955	-0.432992	0.00234981	0.00671918
Srrm2	-0.615276	0.364038	-0.979314	3.27184e-13	1.84266e-11
Elob	-0.0751913	0.0444882	-0.119679	0.405149	0.494322
Pdpk1	-0.0190484	0.0112703	-0.0303187	0.848913	0.882288
Atp6v0c	-0.0612579	0.0362442	-0.0975021	0.492821	0.57736
Rnps1	-0.483054	0.285807	-0.76886	1.93843e-08	3.31839e-07
Eci1	0.100467	-0.0594428	0.159909	0.328992	0.419856
Pgp	-0.50226	0.297171	-0.799431	3.18947e-08	5.01793e-07
Traf7	-0.295356	0.174752	-0.470108	0.0011548	0.00366631
Tsc2	-0.280202	0.165786	-0.445988	0.00290997	0.00804278
Ndufb10	-0.0590024	0.0349097	-0.0939121	0.545533	0.627202
Msrb1	-0.110425	0.0653348	-0.17576	0.235725	0.319556
Mrps34	-0.265239	0.156933	-0.422173	0.00704977	0.0170052
BC003965	0.179354	-0.106118	0.285472	0.0743659	0.122445
Ube2i	-0.251527	0.14882	-0.400348	0.00598128	0.014814
Tpsb2	-0.278786	0.164948	-0.443735	0.00330151	0.00899065
Stub1	-0.505242	0.298935	-0.804177	8.79522e-08	1.17856e-06
Rhot2	-0.328065	0.194105	-0.522171	0.000431934	0.00161239
Mcrip2	-0.152331	0.0901293	-0.24246	0.112203	0.17146
Cox7c-ps1	0.538461	-0.318589	0.85705	9.74036e-09	1.82855e-07
Rab11fip3	-0.133518	0.0789983	-0.212517	0.169658	0.244001
Fam234a	-0.318117	0.188219	-0.506336	0.000455076	0.00167942
Ergic1	-0.345539	0.204444	-0.549983	0.000103047	0.000485382
Atp6v0e	0.0702708	-0.0415769	0.111848	0.462136	0.549361
Cuta	-0.369158	0.218418	-0.587576	3.52023e-05	0.000192129
Ggnbp1	0.0964465	-0.0570642	0.153511	0.3251	0.415706
Uqcc2	0.117341	-0.0694269	0.186768	0.22238	0.306335
Hmga1	-0.196217	0.116095	-0.312313	0.0335621	0.0631585
Nudt3	-0.38357	0.226946	-0.610516	4.25078e-05	0.000225972
Ilrun	-0.387329	0.22917	-0.616499	2.35094e-05	0.000135949
Anks1	-0.279886	0.165599	-0.445485	0.00211113	0.00614062
Mapk14	-0.103395	0.0611752	-0.16457	0.274607	0.362844
Stk38	-0.354288	0.20962	-0.563908	0.000101195	0.000477238
Srsf3	-0.2699	0.159691	-0.429591	0.00450681	0.0116912
Cdkn1a	-0.345516	0.20443	-0.549946	6.68731e-05	0.00033417
BC004004	0.0123674	-0.0073174	0.0196848	0.900053	0.92223
Pi16	-0.263871	0.156124	-0.419994	0.00420004	0.0109834
Mtch1	-0.458602	0.271339	-0.729941	5.65314e-07	5.85816e-06
Rnf8	-0.0445116	0.026336	-0.0708476	0.649938	0.718742
Mdga1	-0.303561	0.179607	-0.483168	0.00104463	0.0033885
Zfand3	-0.199464	0.118016	-0.31748	0.0313672	0.059693
Glo1	-0.0319105	0.0188804	-0.0507909	0.725138	0.783617
Ndufv3	0.348479	-0.206184	0.554663	0.000544318	0.00196035
U2af1	-0.010893	0.00644504	-0.0173381	0.906178	0.92693
Brd4	-0.250403	0.148155	-0.398558	0.00414863	0.0109017
Akap8	-0.239398	0.141644	-0.381042	0.00906508	0.0211573
Zfp871	-0.155081	0.0917562	-0.246837	0.107875	0.165823
Hnrnpm	-0.386788	0.22885	-0.615638	1.00542e-05	6.52263e-05
Marchf2	0.0942696	-0.0557762	0.150046	0.315058	0.405513
Rab11b	-0.404141	0.239117	-0.643258	1.03983e-05	6.71225e-05
Ndufa7	0.244507	-0.144667	0.389174	0.0155076	0.0329843
Cd320	-0.153259	0.0906783	-0.243937	0.101407	0.15877
Daxx	-0.273057	0.161559	-0.434616	0.00171843	0.0051566
Tapbp	-0.465711	0.275546	-0.741256	1.70458e-07	2.0962e-06
Vps52	-0.182344	0.107887	-0.29023	0.0593416	0.100743
H2-K1	-0.355605	0.2104	-0.566004	0.000152479	0.000673334
H2-Ab1	-0.3444	0.20377	-0.548169	0.000133416	0.000602855
H2-Aa	0.101123	-0.0598313	0.160955	0.296485	0.385567
H2-Eb1	-0.0866447	0.0512648	-0.137909	0.362538	0.452768
Rnf5	-0.0172525	0.0102077	-0.0274602	0.854616	0.886083
C4b	-0.12146	0.0718637	-0.193323	0.228561	0.312742
Nelfe	-0.12319	0.0728874	-0.196077	0.182811	0.260031
Abhd16a	-0.331502	0.196139	-0.527641	0.000196435	0.000835172
Csnk2b	-0.236405	0.139873	-0.376277	0.00957025	0.0221501
Bag6	-0.659319	0.390097	-1.04942	5.16167e-15	4.26771e-13
Prrc2a	-0.458639	0.271361	-0.730001	2.08746e-08	3.51164e-07
Ddx39b	-0.507013	0.299982	-0.806995	1.90304e-09	4.42827e-08
H2-D1	-0.255949	0.151436	-0.407386	0.00651596	0.0158952
Flot1	-0.466914	0.276258	-0.743172	5.10014e-07	5.41507e-06
Tubb5	-0.216482	0.128085	-0.344567	0.0193384	0.039888
2310061I04Rik	-0.395532	0.234023	-0.629555	2.69324e-05	0.000153011
Rpp21	0.0479861	-0.0283918	0.0763779	0.607227	0.681005
Ppp1r11	0.00485187	-0.00287069	0.00772257	0.956709	0.966408
Znrd1	-0.0612536	0.0362417	-0.0974953	0.507344	0.592409
Znrd1as	0.227943	-0.134866	0.36281	0.0155322	0.0330187
Mmut	-0.214199	0.126734	-0.340933	0.0234805	0.0468164
Adgrf5	-0.203802	0.120583	-0.324385	0.0324902	0.0614988
Pla2g7	-0.307608	0.182001	-0.489609	0.00136594	0.00420606
Rcan2	0.0551916	-0.032655	0.0878466	0.572257	0.650612
Enpp4	-0.0140732	0.00832663	-0.0223998	0.883381	0.908874
Clic5	-0.00428456	0.00253503	-0.0068196	0.965853	0.97362
Cdc5l	-0.210135	0.12433	-0.334465	0.0357426	0.0664732
Hsp90ab1	-0.511674	0.30274	-0.814414	1.53261e-08	2.75728e-07
Slc29a1	-0.392681	0.232336	-0.625017	1.18594e-05	7.4936e-05
Mrpl14	0.170508	-0.100884	0.271391	0.087739	0.140315
Vegfa	-0.278209	0.164607	-0.442815	0.00198479	0.00582105
Polr1c	-0.0802599	0.0474871	-0.127747	0.388448	0.477636
Yipf3	-0.252299	0.149277	-0.401576	0.00525361	0.0132741
Mrpl2	-0.101467	0.0600348	-0.161502	0.279597	0.367438
Cul7	-0.356788	0.2111	-0.567888	7.76373e-05	0.000379018
Klhdc3	-0.348551	0.206226	-0.554777	0.00015103	0.000667693
Mea1	0.125198	-0.0740756	0.199274	0.17698	0.252754
Cnpy3	-0.152357	0.0901446	-0.242502	0.0850464	0.136792
2310039H08Rik	-0.100676	0.0595669	-0.160243	0.289189	0.37749
Ubr2	-0.426545	0.252373	-0.678918	3.31555e-06	2.55133e-05
Ccnd3	-0.297776	0.176184	-0.473961	0.000700574	0.00241994
Tomm6	-0.306492	0.181341	-0.487833	0.00163878	0.00494048
Apobec2	0.34406	-0.203569	0.547629	0.000255676	0.00103066
Plcl2	-0.264355	0.15641	-0.420765	0.00617833	0.0152535
Satb1	-0.373283	0.220859	-0.594141	3.67574e-05	0.000198664
Rab5a	-0.284687	0.16844	-0.453127	0.00251975	0.00711611
Mpnd	-0.178465	0.105592	-0.284057	0.0560115	0.096055
Ubxn6	-0.0791786	0.0468473	-0.126026	0.415418	0.504601
Plin4	-0.27751	0.164193	-0.441704	0.0042451	0.0110789
Dpp9	-0.299905	0.177444	-0.477349	0.00119641	0.00378145
Fem1a	-0.308059	0.182268	-0.490327	0.00108611	0.00348522
Plin3	-0.188224	0.111366	-0.29959	0.0386295	0.0707752
Ptprs	-0.502547	0.29734	-0.799887	4.8188e-08	7.12739e-07
Safb2	-0.256922	0.152012	-0.408935	0.00386514	0.01029
Ranbp3	-0.12909	0.0763785	-0.205469	0.15287	0.223496
Ndufa11	-0.0755839	0.0447205	-0.120304	0.421774	0.510597
Clpp	-0.180792	0.106968	-0.28776	0.0526473	0.0912929
Alkbh7	-0.0306286	0.0181219	-0.0487505	0.75305	0.805496
Khsrp	-0.365515	0.216263	-0.581778	2.89142e-05	0.000162371
C3	-0.239336	0.141607	-0.380943	0.015589	0.0331212
Trip10	-0.31297	0.185174	-0.498144	0.00174438	0.00522864
Pja2	-0.0867429	0.0513229	-0.138066	0.349748	0.440273
Man2a1	-0.278862	0.164994	-0.443856	0.00238956	0.0068178
Vapa	-0.423558	0.250605	-0.674164	1.20084e-05	7.5754e-05
Ralbp1	-0.220902	0.1307	-0.351602	0.0200834	0.0412061
Ndufv2	0.296625	-0.175503	0.472128	0.00147451	0.00448704
Rab12	-0.5006	0.296188	-0.796788	6.51909e-08	9.14556e-07
Lrrc30	0.0928358	-0.0549278	0.147764	0.326596	0.417346
Myl12a	0.376834	-0.22296	0.599794	0.00011271	0.000524542
Myom1	-0.404056	0.239066	-0.643122	8.77166e-06	5.7774e-05
Wdr43	-0.229685	0.135897	-0.365583	0.0126146	0.0278683
Clip4	-0.0669663	0.0396217	-0.106588	0.4958	0.579976
Ypel5	0.0594426	-0.0351702	0.0946128	0.521218	0.605516
Lbh	-0.397962	0.235461	-0.633423	4.4929e-06	3.2804e-05
Ehd3	-0.0548891	0.032476	-0.0873651	0.554877	0.634379
Dpy30	0.236675	-0.140033	0.376708	0.0180985	0.0376706
Birc6	0.026302	-0.015562	0.0418641	0.768598	0.817398
Ltbp1	-0.109732	0.0649251	-0.174658	0.257343	0.344127
Rasgrp3	-0.157941	0.0934487	-0.25139	0.0990127	0.155272
Fez2	0.0815003	-0.048221	0.129721	0.416423	0.505062
Cebpzos	0.000274203	-0.000162237	0.00043644	0.997667	0.997704
Cdc42ep3	-0.25892	0.153194	-0.412114	0.00423855	0.0110692
Atl2	-0.245541	0.145278	-0.390819	0.0106139	0.0242763
Srsf7	-0.139537	0.0825591	-0.222096	0.169932	0.244209
Pkdcc	-0.218459	0.129255	-0.347713	0.0196483	0.0403985
Cox7a2l	-0.047594	0.0281598	-0.0757538	0.621498	0.693608
Lrpprc	-0.384415	0.227446	-0.611861	2.64617e-05	0.000150777
Ppm1b	-0.212166	0.125531	-0.337697	0.0327682	0.0618441
Epas1	-0.310036	0.183438	-0.493474	0.000847041	0.0028327
Rhoq	-0.375693	0.222285	-0.597978	6.81101e-05	0.00033846
Cript	0.0947468	-0.0560585	0.150805	0.331937	0.422782
Calm2	0.223368	-0.132159	0.355527	0.0218916	0.0442385
Fbxo11	-0.0398071	0.0235525	-0.0633596	0.687844	0.751676
Cul2	0.0177122	-0.0104797	0.028192	0.857975	0.888854
Svil	-0.578914	0.342524	-0.921439	1.54192e-10	4.75548e-09
Zeb1	-0.217336	0.128591	-0.345927	0.0228238	0.0457891
Kif5b	-0.392206	0.232055	-0.624261	8.0143e-06	5.35113e-05
Rab18	-0.0310046	0.0183444	-0.0493489	0.747105	0.801117
Ccny	-0.184122	0.108939	-0.293061	0.0592815	0.100729
Usp14	-0.223431	0.132197	-0.355628	0.0166958	0.0352034
Rock1	-0.246624	0.145919	-0.392543	0.0108831	0.0247901
Mib1	-0.0747179	0.0442081	-0.118926	0.443372	0.53079
Riok3	-0.0418038	0.0247339	-0.0665377	0.679659	0.744826
Npc1	-0.312806	0.185077	-0.497883	0.000469978	0.00171971
Dtna	0.119114	-0.0704756	0.189589	0.197247	0.277718
Mapre2	-0.342461	0.202623	-0.545085	0.000323068	0.00126049
Ino80c	-0.257142	0.152142	-0.409284	0.00426653	0.0111184
Galnt1	-0.135174	0.0799781	-0.215152	0.173156	0.248114
Elp2	-0.116311	0.0688172	-0.185128	0.228748	0.312888
Slc25a46	0.0804712	-0.0476121	0.128083	0.413346	0.502743
Wdr33	-0.0250601	0.0148272	-0.0398873	0.800817	0.843811
Iws1	-0.199606	0.1181	-0.317705	0.0368415	0.0679514
Bin1	-0.430492	0.254708	-0.685199	2.15682e-06	1.78708e-05
Nrep	-0.162401	0.096087	-0.258488	0.104732	0.162861
Srp19	0.321932	-0.190477	0.512409	0.00196009	0.005766
Reep5	-0.189044	0.111851	-0.300895	0.0459725	0.0816122
Cdc23	-0.31342	0.18544	-0.49886	0.000312559	0.00122687
Fam53c	-0.317745	0.187999	-0.505744	0.000359499	0.00137501
Etf1	0.0541138	-0.0320173	0.0861311	0.576415	0.65444
Hspa9	-0.268017	0.158577	-0.426594	0.00578121	0.0143919
Ctnna1	-0.393783	0.232988	-0.626772	2.78315e-06	2.22537e-05
Matr3	-0.268222	0.158698	-0.42692	0.00204596	0.00597789
Paip2	0.0521509	-0.030856	0.0830069	0.594313	0.669862
Ube2d2a	-0.505756	0.299239	-0.804994	1.79859e-08	3.17697e-07
Cxxc5	-0.312344	0.184804	-0.497148	0.00119691	0.00378145
Pura	-0.302693	0.179093	-0.481786	0.000611592	0.00215081
Cystm1	0.214882	-0.127139	0.342021	0.0240921	0.0478383
Pfdn1	0.186224	-0.110182	0.296406	0.0666233	0.111642
Ankhd1	-0.393282	0.232692	-0.625975	1.34549e-05	8.36573e-05
Sra1	0.0966919	-0.0572094	0.153901	0.329634	0.420262
Ndufa2	-0.123265	0.0729318	-0.196197	0.18672	0.264672
Ik	-0.00405115	0.00239693	-0.00644809	0.965291	0.973305
Zmat2	0.0159324	-0.00942669	0.0253591	0.871163	0.899639
Diaph1	-0.365735	0.216393	-0.582128	1.51392e-05	9.2647e-05
Rnf14	-0.0222982	0.0131931	-0.0354913	0.806157	0.848058
Ndfip1	-0.220493	0.130458	-0.350952	0.0201388	0.0412978
Nr3c1	-0.230055	0.136116	-0.366171	0.0125469	0.027766
Lars	-0.1201	0.0710593	-0.19116	0.215884	0.299189
Myot	0.409177	-0.242096	0.651274	1.50636e-05	9.233e-05
Pggt1b	-0.274267	0.162274	-0.436541	0.0026296	0.00738341
Fem1c	-0.148299	0.0877435	-0.236042	0.101385	0.15877
Atg12	-0.0316	0.0186967	-0.0502967	0.744903	0.799419
Eno1b	-0.0867851	0.0513478	-0.138133	0.343773	0.435005
Lox	0.0461244	-0.0272903	0.0734147	0.636655	0.707071
Ppic	-0.189957	0.112391	-0.302348	0.0372944	0.0687505
Csnk1g3	-0.200983	0.118915	-0.319899	0.0233853	0.0467224
Aldh7a1	-0.0810629	0.0479622	-0.129025	0.38581	0.475051
Ctxn3	0.245086	-0.145009	0.390095	0.0152887	0.0327061
Slc12a2	-0.371446	0.219772	-0.591217	0.000138075	0.000621018
F830016B08Rik	-0.0436152	0.0258057	-0.0694209	0.649505	0.718467
Dctn4	-0.0836912	0.0495173	-0.133209	0.39413	0.482999
Myoz3	-0.338173	0.200086	-0.538259	0.000144155	0.000641681
Synpo	-0.495542	0.293195	-0.788737	1.12018e-08	2.08279e-07
Ndst1	-0.299318	0.177097	-0.476415	0.00109439	0.00350312
Cd74	-0.187784	0.111106	-0.29889	0.0376504	0.0693082
Tcof1	-0.293923	0.173905	-0.467828	0.000997215	0.00326743
Camk2a	-0.694211	0.410741	-1.10495	1.80774e-16	2.34162e-14
Csf1r	-0.300402	0.177738	-0.478139	0.000777397	0.00264997
Csnk1a1	-0.559835	0.331236	-0.891071	4.82929e-10	1.30324e-08
Ablim3	-0.321093	0.18998	-0.511073	0.000613585	0.00215481
Txnl1	-0.0813164	0.0481122	-0.129429	0.392763	0.481627
Wdr7	-0.354906	0.209986	-0.564893	9.77869e-05	0.000462287
Fech	0.14577	-0.0862472	0.232017	0.145679	0.214354
Nars	-0.353278	0.209023	-0.5623	0.000114625	0.000532176
Nedd4l	-0.327638	0.193853	-0.521491	0.000339437	0.00131249
Alpk2	-0.366516	0.216855	-0.583371	3.91599e-05	0.000209897
Zfp532	-0.361542	0.213912	-0.575455	0.000109584	0.000512445
Sec11c	0.0246173	-0.0145653	0.0391826	0.799978	0.843384
Lman1	-0.238131	0.140894	-0.379024	0.0086178	0.0202594
Chmp1b	0.0195288	-0.0115546	0.0310834	0.844293	0.878897
Tubb6	-0.270428	0.160003	-0.430431	0.00558595	0.0140005
Afg3l2	-0.198644	0.117531	-0.316175	0.0427611	0.0768237
Psmg2	-0.0429005	0.0253828	-0.0682833	0.655121	0.723033
Fam210a	-0.0319834	0.0189235	-0.0509069	0.748451	0.801897
Rnmt	0.0799021	-0.0472754	0.127177	0.422869	0.511603
Tcf4	-0.321093	0.18998	-0.511074	0.000708055	0.00244144
Mbd2	-0.193248	0.114338	-0.307586	0.0388637	0.071099
Cxxc1	-0.362823	0.21467	-0.577493	5.75972e-05	0.000293731
Mbd1	-0.20555	0.121617	-0.327167	0.025954	0.0509124
Acaa2	0.15638	-0.0925249	0.248905	0.105736	0.163506
BC031181	0.214552	-0.126943	0.341496	0.0248032	0.0490261
Dym	-0.0772764	0.0457219	-0.122998	0.433818	0.521763
Ier3ip1	-0.134027	0.0792991	-0.213326	0.178785	0.255051
Pias2	-0.0388862	0.0230076	-0.0618938	0.674225	0.739905
St8sia5	-0.494325	0.292476	-0.786801	1.21181e-07	1.54397e-06
Atp5a1	-0.329731	0.195091	-0.524821	0.000396312	0.00150397
Txnl4a	-0.199801	0.118216	-0.318017	0.0299477	0.0573566
Mbp	-0.0268046	0.0158594	-0.042664	0.78519	0.830498
Tshz1	-0.291854	0.17268	-0.464534	0.00144665	0.00441263
Cndp2	-0.293024	0.173373	-0.466397	0.000978067	0.00321282
Cyb5a	0.152543	-0.0902547	0.242798	0.110912	0.170088
Socs6	-0.214998	0.127207	-0.342206	0.0277759	0.053912
Ppp6r3	-0.0651856	0.0385681	-0.103754	0.494052	0.578628
Ndufs8	0.277497	-0.164185	0.441682	0.0034733	0.00938613
Ndufv1	0.373964	-0.221262	0.595227	0.000167891	0.000726532
Gstp1	-0.0676395	0.0400201	-0.10766	0.479844	0.565567
Gstp2	-0.0565703	0.0334708	-0.0900411	0.559904	0.638623
Aip	-0.140166	0.0829313	-0.223097	0.132105	0.197446
Tmem134	-0.0990122	0.0585822	-0.157594	0.306859	0.396823
Carns1	-0.325363	0.192507	-0.51787	0.000787547	0.00268222
Ppp1ca	-0.337019	0.199403	-0.536422	0.0002274	0.000933134
Grk2	-0.444146	0.262786	-0.706932	3.94734e-07	4.38267e-06
Kdm2a	-0.434784	0.257247	-0.692031	9.42375e-07	8.99771e-06
Ctsf	0.127214	-0.0752684	0.202483	0.182633	0.25996
Actn3	-0.622953	0.36858	-0.991533	9.20873e-14	6.16985e-12
Yif1a	-0.0180917	0.0107042	-0.0287959	0.850423	0.883621
Rab1b	-0.150141	0.0888334	-0.238974	0.105658	0.163467
Sf3b2	-0.374711	0.221704	-0.596415	7.00217e-05	0.000347072
Cst6	0.117732	-0.0696582	0.18739	0.232225	0.315973
Banf1	-0.124796	0.0738374	-0.198633	0.172203	0.24693
Eif1ad	-0.256488	0.151755	-0.408243	0.00702975	0.0169675
Drap1	-0.145713	0.0862133	-0.231926	0.111411	0.170517
Fibp	0.0265686	-0.0157198	0.0422884	0.79341	0.837369
Mus81	-0.210049	0.124279	-0.334327	0.0326215	0.0616272
Cfl1	-0.185891	0.109986	-0.295877	0.0377832	0.0694867
Ehbp1l1	-0.805797	0.476763	-1.28256	1.11631e-20	3.3369e-18
Ltbp3	-0.52301	0.309447	-0.832457	7.40796e-09	1.48388e-07
Neat1	-0.76108	0.450306	-1.21139	2.86306e-22	1.2362e-19
Dpf2	-0.342515	0.202655	-0.54517	0.000163032	0.000710332
Cdc42ep2	-0.13314	0.0787747	-0.211915	0.168803	0.243132
Capn1	-0.303484	0.179561	-0.483046	0.00183315	0.00546289
Fau	-0.203252	0.120258	-0.32351	0.0301434	0.0577031
Arl2	-0.13602	0.0804784	-0.216498	0.176491	0.252241
Sf1	-0.545048	0.322487	-0.867535	1.99529e-10	5.96438e-09
Pygm	-0.764546	0.452356	-1.2169	6.65448e-21	2.35085e-18
Prdx5	-0.0293567	0.0173694	-0.0467261	0.760512	0.810795
Trmt112	-0.15181	0.0898207	-0.24163	0.10026	0.157165
Ppp1r14b	-0.160904	0.0952015	-0.256105	0.0880805	0.140664
Vegfb	-0.193755	0.114638	-0.308393	0.0433624	0.0777961
Dnajc4	-0.268861	0.159076	-0.427936	0.00464661	0.0119721
Stip1	-0.0637164	0.0376989	-0.101415	0.475627	0.561961
Macrod1	-0.497541	0.294379	-0.79192	3.87957e-08	5.98254e-07
Cox8a	-0.0636617	0.0376665	-0.101328	0.489977	0.574608
Rtn3	-0.303003	0.179277	-0.48228	0.000831131	0.00279151
Plaat3	0.383138	-0.22669	0.609828	8.29058e-05	0.000402715
Slc3a2	-0.188661	0.111624	-0.300285	0.0462267	0.0819915
Nxf1	-0.409051	0.242022	-0.651072	4.59477e-06	3.33744e-05
Tmem223	-0.159905	0.0946107	-0.254516	0.0834921	0.134794
Polr2g	0.059007	-0.0349125	0.0939195	0.549948	0.630781
Ttc9c	-0.152549	0.0902585	-0.242808	0.104441	0.162603
Hnrnpul2	-0.381544	0.225747	-0.607291	2.10083e-05	0.000123194
Bscl2	-0.0854423	0.0505533	-0.135996	0.379024	0.469072
Ubxn1	-0.456456	0.27007	-0.726526	1.17199e-07	1.50309e-06
Uqcc3	-0.0244077	0.0144412	-0.0388489	0.800405	0.843605
Ints5	-0.444197	0.262817	-0.707013	2.94471e-07	3.38554e-06
Ganab	-0.440604	0.260691	-0.701294	2.8332e-06	2.2469e-05
Mta2	-0.230994	0.136671	-0.367665	0.0157793	0.0335072
Eef1g	-0.347834	0.205802	-0.553636	0.000119121	0.000550423
Ahnak	-0.41495	0.245512	-0.660462	2.40121e-06	1.95211e-05
Fth1	-0.146549	0.0867082	-0.233257	0.112932	0.172321
Tmem258	0.120393	-0.0712326	0.191626	0.216577	0.300041
Ddb1	-0.362613	0.214546	-0.57716	2.04146e-05	0.000120564
Tmem109	-0.252324	0.149291	-0.401615	0.0100721	0.0231957
Prpf19	-0.243671	0.144172	-0.387843	0.00984214	0.0227117
Mrpl16	-0.210368	0.124468	-0.334836	0.0297351	0.057062
Patl1	-0.324068	0.19174	-0.515809	0.000477862	0.00174692
Osbp	-0.206624	0.122253	-0.328877	0.0291857	0.0562019
Fam111a	-0.253879	0.150212	-0.404091	0.00585376	0.0145353
Zfp91	-0.382725	0.226445	-0.60917	2.85248e-05	0.000160416
Vps13a	-0.00128528	0.000760458	-0.00204574	0.989165	0.990695
Prune2	-0.467253	0.276458	-0.743711	1.67089e-07	2.0613e-06
Rfk	-0.0384848	0.0227702	-0.061255	0.687357	0.751356
Ostf1	-0.286276	0.16938	-0.455655	0.00288806	0.00799359
Carnmt1	-0.157461	0.0931642	-0.250625	0.0881053	0.140664
Anxa1	-0.0791097	0.0468066	-0.125916	0.41571	0.504601
Aldh1a1	0.0874865	-0.0517629	0.139249	0.364111	0.454087
Zfand5	-0.450722	0.266677	-0.7174	1.45253e-06	1.31574e-05
Cemip2	-0.291694	0.172586	-0.46428	0.00146678	0.00446702
Klf9	-0.271417	0.160589	-0.432006	0.00359164	0.00964556
Fam122a	-0.155083	0.0917576	-0.246841	0.0824008	0.133445
Smarca2	-0.389167	0.230257	-0.619425	2.51881e-05	0.000144155
Vldlr	-0.348639	0.206278	-0.554917	0.000126732	0.000579388
Cdc37l1	0.0349558	-0.0206822	0.055638	0.728951	0.786206
Ak3	-0.306265	0.181207	-0.487471	0.00215631	0.0062208
Plgrkt	0.0611913	-0.0362048	0.0973961	0.52175	0.605773
Ermp1	-0.0832506	0.0492566	-0.132507	0.376149	0.466026
9930021J03Rik	-0.151125	0.0894158	-0.240541	0.112164	0.17146
Sgms1	-0.23273	0.137698	-0.370428	0.0118429	0.0265253
Atad1	0.129592	-0.0766754	0.206268	0.179533	0.255836
Acta2	-0.189226	0.111959	-0.301185	0.0459191	0.0815547
Pank1	0.0234612	-0.0138812	0.0373425	0.811794	0.853271
Rpp30	0.0454619	-0.0268983	0.0723601	0.644658	0.713919
Ankrd1	-0.0127759	0.00755906	-0.0203349	0.891878	0.915919
Ppp1r3c	-0.0380885	0.0225357	-0.0606241	0.671155	0.737379
Tnks2	-0.43781	0.259037	-0.696847	4.76922e-06	3.44483e-05
Cpeb3	-0.308902	0.182767	-0.491668	0.000788974	0.00268472
Marchf5	-0.111362	0.0658892	-0.177251	0.232988	0.316494
Ide	-0.196928	0.116516	-0.313444	0.0356087	0.0662717
Exoc6	-0.0768991	0.0454986	-0.122398	0.42943	0.517768
Pdlim1	-0.0478314	0.0283003	-0.0761317	0.615511	0.688508
Tm9sf3	-0.213554	0.126353	-0.339907	0.0208599	0.0425519
Ankrd2	-0.0541185	0.0320201	-0.0861387	0.581488	0.658793
Marveld1	-0.283127	0.167517	-0.450645	0.00191798	0.00568086
Got1	-0.143809	0.085087	-0.228896	0.124604	0.187751
Slc25a28	-0.382292	0.22619	-0.608482	9.74879e-06	6.33508e-05
Cox15	-0.181619	0.107458	-0.289077	0.043129	0.0774489
Ndufb8	-0.567119	0.335545	-0.902664	5.86454e-10	1.5295e-08
Hif1an	-0.337852	0.199896	-0.537747	0.000301958	0.00119007
Sfxn3	-0.285986	0.169208	-0.455194	0.002329	0.00667933
Lbx1	-0.591948	0.350236	-0.942184	1.62697e-11	6.32239e-10
Oga	-0.106762	0.0631674	-0.169929	0.279002	0.366904
Cuedc2	-0.165041	0.0976493	-0.26269	0.0618074	0.104292
Actr1a	-0.0806558	0.0477213	-0.128377	0.3842	0.473869
Trim8	-0.41199	0.243761	-0.65575	8.17303e-07	8.03981e-06
Arl3	-0.0474048	0.0280478	-0.0754526	0.618506	0.69146
Wbp1l	-0.462882	0.273872	-0.736754	3.40271e-07	3.83274e-06
As3mt	-0.0672833	0.0398093	-0.107093	0.475084	0.561831
Atp5md	0.526999	-0.311808	0.838807	1.8405e-08	3.2217e-07
Neurl1a	-0.540492	0.319791	-0.860283	1.03583e-09	2.56386e-08
Sh3pxd2a	-0.32447	0.191978	-0.516449	0.000419752	0.00157905
Slk	-0.210384	0.124477	-0.334861	0.0320212	0.060759
Sfr1	-0.158768	0.0939375	-0.252705	0.0779185	0.127491
Gsto1	-0.141829	0.0839156	-0.225745	0.132659	0.198046
Add3	-0.117858	0.0697324	-0.18759	0.222317	0.306335
Mxi1	0.0165134	-0.00977043	0.0262838	0.86955	0.898211
Nutf2-ps1	0.0845345	-0.0500163	0.134551	0.349644	0.440273
Smc3	-0.0836157	0.0494726	-0.133088	0.372439	0.46256
Pdcd4	-0.221447	0.131023	-0.35247	0.013934	0.0301827
Bbip1	0.140135	-0.0829134	0.223049	0.162502	0.235364
Gpam	-0.467198	0.276425	-0.743623	4.70445e-07	5.08057e-06
Zdhhc6	0.103852	-0.0614458	0.165298	0.296145	0.385405
Tcf7l2	-0.408865	0.241912	-0.650776	1.80352e-06	1.56669e-05
Nrap	-0.490617	0.290282	-0.780899	4.62798e-07	5.02356e-06
Ablim1	-0.0458282	0.027115	-0.0729432	0.630987	0.701779
Atrnl1	-0.311454	0.184277	-0.495731	0.000467914	0.00171526
Cacul1	-0.247298	0.146318	-0.393617	0.00624237	0.0153725
Eif3a	-0.328716	0.19449	-0.523206	0.000198815	0.00084069
Prdx3	0.360434	-0.213257	0.57369	0.000481149	0.00175563
Csf2ra	-0.281464	0.166533	-0.447997	0.00210205	0.00611879
Prpf18	0.0943059	-0.0557977	0.150104	0.317266	0.407569
Phyh	-0.122468	0.0724603	-0.194928	0.191261	0.270171
Cdc123	-0.0186965	0.0110621	-0.0297586	0.84185	0.878
Sec61a2	0.108539	-0.0642188	0.172758	0.274711	0.362857
Celf2	-0.626079	0.37043	-0.99651	1.61542e-13	1.04625e-11
Atp5c1	0.566499	-0.335178	0.901677	1.53545e-09	3.77644e-08
Itih5	-0.165806	0.0981017	-0.263907	0.0809704	0.131653
Prkcq	0.190911	-0.112956	0.303867	0.0594913	0.100953
Pfkfb3	-0.407282	0.240975	-0.648257	7.22596e-06	4.91047e-05
Rbm17	-0.288438	0.170659	-0.459097	0.00230284	0.00661895
Pter	0.139077	-0.0822872	0.221364	0.138396	0.205113
Rsu1	0.175687	-0.103948	0.279635	0.0721406	0.119445
Vim	-0.0537555	0.0318053	-0.0855608	0.562221	0.640701
Hacd1	0.170553	-0.10091	0.271463	0.0853287	0.137098
Mrc1	-0.204264	0.120856	-0.32512	0.0325971	0.0616111
Plxdc2	-0.256849	0.151969	-0.408818	0.00514004	0.0130248
Commd3	0.356188	-0.210745	0.566933	0.000163722	0.000712458
Bmi1	-0.0453311	0.0268209	-0.072152	0.640362	0.70997
Pip4k2a	-0.241414	0.142837	-0.384251	0.00634227	0.0155692
Etl4	-0.321293	0.190099	-0.511392	0.000569784	0.00203136
Yme1l1	0.345922	-0.20467	0.550592	0.00052198	0.00188514
Mrpl41	0.276572	-0.163639	0.440211	0.00503759	0.0127986
Tubb4b	-0.519955	0.30764	-0.827596	1.57843e-08	2.82663e-07
Anapc2	-0.320337	0.189533	-0.50987	0.000653997	0.00227931
Entpd2	-0.196211	0.116092	-0.312303	0.030503	0.058334
Edf1	-0.15976	0.0945244	-0.254284	0.0875572	0.140193
Phpt1	-0.187053	0.110673	-0.297726	0.060551	0.102349
Camsap1	-0.152611	0.0902946	-0.242905	0.120213	0.182031
Ubac1	0.101927	-0.0603068	0.162234	0.26908	0.357363
Nacc2	-0.422242	0.249827	-0.672069	4.7274e-06	3.42099e-05
Dnlz	-0.242237	0.143323	-0.38556	0.00726744	0.017476
Surf4	-0.403856	0.238948	-0.642804	4.12767e-06	3.08686e-05
Cacfd1	-0.25828	0.152816	-0.411096	0.00514154	0.0130248
Mymk	-0.322712	0.190938	-0.51365	0.000600323	0.00212007
Wdr5	-0.270588	0.160098	-0.430687	0.00385634	0.0102853
Rxra	-0.617777	0.365518	-0.983296	2.63746e-13	1.57679e-11
Col5a1	-0.505505	0.29909	-0.804595	1.8628e-08	3.24612e-07
Rapgef1	-0.695106	0.411271	-1.10638	5.30435e-16	5.72575e-14
Slc27a4	-0.406079	0.240263	-0.646342	3.40926e-06	2.61309e-05
Sptan1	-0.180049	0.106529	-0.286577	0.0657574	0.110286
Set	-0.345104	0.204186	-0.54929	2.96779e-05	0.00016594
Zer1	-0.211446	0.125106	-0.336552	0.0345454	0.0646023
Lrrc8a	-0.228447	0.135164	-0.363611	0.0126373	0.0279025
Crat	-0.283673	0.16784	-0.451512	0.00461018	0.0119275
Ptpa	-0.245208	0.145081	-0.390289	0.012296	0.027351
BC005624	-0.096718	0.0572248	-0.153943	0.288894	0.377345
Fnbp1	-0.263888	0.156134	-0.420022	0.00336563	0.00912689
Gpr107	-0.171997	0.101765	-0.273762	0.0832424	0.134447
Abl1	-0.296259	0.175287	-0.471546	0.000709949	0.0024458
Prrc2b	-0.353158	0.208952	-0.562109	0.000321845	0.00125698
Swi5	-0.109343	0.0646945	-0.174037	0.269379	0.357638
1110008P14Rik	0.114125	-0.0675237	0.181648	0.238073	0.322353
Dpm2	-0.0857215	0.0507186	-0.13644	0.356612	0.447175
Ak1	-0.658789	0.389784	-1.04857	7.79009e-14	5.31092e-12
Angptl2	-0.457389	0.270622	-0.728011	2.24101e-07	2.66317e-06
Mapkap1	-0.396885	0.234824	-0.631709	1.23572e-05	7.77025e-05
Gapvd1	-0.357493	0.211517	-0.56901	6.08068e-05	0.000308943
Hspa5	-0.143486	0.084896	-0.228382	0.118301	0.179507
Rab14	-0.289051	0.171022	-0.460072	0.00232186	0.00666376
Gsn	-0.487305	0.288322	-0.775628	4.43151e-08	6.70038e-07
Stom	-0.267564	0.158309	-0.425873	0.00412859	0.0108697
Ndufa8	-0.329416	0.194905	-0.524321	0.000320723	0.00125512
Mrrf	0.073015	-0.0432005	0.116215	0.434905	0.522747
Psmb7	0.0820139	-0.0485249	0.130539	0.398206	0.486613
Arpc5l	-0.0232046	0.0137294	-0.036934	0.806669	0.848367
Ppp6c	-0.12288	0.072704	-0.195584	0.185933	0.263895
Acvr2a	0.0404474	-0.0239314	0.0643787	0.692153	0.754687
Mmadhc	0.0222394	-0.0131583	0.0353977	0.813031	0.854133
Neb	-0.260776	0.154293	-0.415069	0.00925369	0.0215071
Prpf40a	-0.223034	0.131962	-0.354996	0.0111772	0.0253559
Gpd2	-0.439074	0.259786	-0.69886	7.6432e-07	7.61576e-06
Acvr1	-0.521663	0.30865	-0.830313	4.73343e-09	9.8893e-08
Baz2b	-0.391834	0.231835	-0.62367	4.975e-06	3.57807e-05
Itgb6	-0.0037216	0.00220194	-0.00592354	0.969006	0.975786
Rbms1	-0.340565	0.201501	-0.542065	9.98753e-05	0.000471586
Psmd14	-0.0951631	0.0563049	-0.151468	0.300525	0.390191
Grb14	0.208986	-0.12365	0.332636	0.0366735	0.0677345
Xirp2	-0.539703	0.319324	-0.859028	9.5531e-09	1.81977e-07
Klhl41	0.0674652	-0.0399169	0.107382	0.501463	0.58607
Ppig	-0.2623	0.155194	-0.417494	0.00288767	0.00799359
Ssb	0.0812992	-0.048102	0.129401	0.384241	0.473869
Ubr3	-0.195391	0.115606	-0.310998	0.0490534	0.0859818
Gorasp2	-0.237467	0.140501	-0.377969	0.00958635	0.0221741
Dync1i2	-0.34383	0.203433	-0.547263	0.000330198	0.00128187
Slc25a12	-0.178815	0.105799	-0.284615	0.0462952	0.0820479
Itga6	-0.328632	0.194441	-0.523073	0.000273738	0.00109326
Map3k20	-0.30293	0.179234	-0.482164	0.0013925	0.00428444
Ola1	-0.27424	0.162259	-0.436499	0.00179735	0.00536856
Chrna1	-0.333357	0.197237	-0.530594	0.000464915	0.00170601
Atp5g3	-0.0349717	0.0206916	-0.0556632	0.707592	0.768932
[truncated: 1,887 more rows]
