# Supplementary material for: Compartment-specific remodeling of skeletal muscle in Duchenne muscular dystrophy
Source: Research Square preprint supplement (doi:10.21203/rs.3.rs-8852148/v1), 2026-02-23
Supplement: Supplementary file 6 [file e4c4a0d57c87324f9b1e86b6.xlsx]

## Sheet: TA
		Proximal	Central	Distal
data_WT_m1_rep1	MYH1	860	1234	457
	MYH2	88	125	47
	MYH4	1229	1776	770
	MYH1-2	41	69	28
	total	2218	3204	1302
data_WT_m1_rep2	MYH1	775	1307	413
	MYH2	86	131	47
	MYH4	1209	1787	701
	MYH1-2	46	56	21
	total	2116	3281	1182
data_WT_m1_rep3	MYH1	983	1343	377
	MYH2	81	120	40
	MYH4	1263	1790	669
	MYH1-2	74	55	18
	total	2401	3308	1104
data_WT_m2_rep1	MYH1	1170	1411	138
	MYH2	149	151	16
	MYH4	1660	1876	317
	MYH1-2	51	61	12
	total	3030	3499	483
data_WT_m2_rep2	MYH1	1260	1507	130
	MYH2	131	153	11
	MYH4	1710	1979	246
	MYH1-2	84	83	3
	total	3185	3722	390
data_WT_m3_rep1	MYH1	809	937	323
	MYH2	135	142	55
	MYH4	1448	1645	703
	MYH1-2	116	140	42
	total	2508	2864	1123
data_WT_m3_rep2	MYH1	735	978	229
	MYH2	107	131	34
	MYH4	1152	1585	604
	MYH1-2	131	135	27
	total	2125	2829	894
data_WT_m3_rep3	MYH1	849	839	201
	MYH2	160	146	39
	MYH4	1363	1612	645
	MYH1-2	175	133	32
	total	2547	2730	917
data_Ctr_m1_rep1	MYH1	492	751	138
	MYH2	83	141	27
	MYH4	1220	2277	856
	MYH1-2	86	141	20
	total	1881	3310	1041
data_Ctr_m1_rep2	MYH1	564	777	177
	MYH2	97	153	31
	MYH4	1694	2943	1354
	MYH1-2	72	139	17
	total	2427	4012	1579
data_Ctr_m1_rep3	MYH1	506	774	172
	MYH2	91	174	31
	MYH4	1430	2970	1250
	MYH1-2	99	169	23
	total	2126	4087	1476
data_Ctr_m2_rep1	MYH1	360	665	226
	MYH2	54	114	15
	MYH4	1375	2568	1072
	MYH1-2	25	30	1
	total	1814	3377	1314
data_Ctr_m2_rep2	MYH1	441	562	300
	MYH2	52	75	18
	MYH4	1435	2337	1447
	MYH1-2	28	8	3
	total	1956	2982	1768
data_Ctr_m2_rep3	MYH1	530	710	295
	MYH2	62	112	20
	MYH4	1494	2696	1281
	MYH1-2	28	32	4
	total	2114	3550	1600
data_DMD_m1_rep1	MYH1	472	1237	371
	MYH2	50	115	16
	MYH4	1530	3723	1635
	MYH1-2	0	0	0
	total	2052	5075	2022
data_DMD_m1_rep2	MYH1	178	1346	418
	MYH2	18	111	15
	MYH4	326	3605	1585
	MYH1-2	0	0	0
	total	522	5062	2018
data_DMD_m2_rep1	MYH1	363	979	440
	MYH2	71	153	55
	MYH4	1849	3598	2095
	MYH1-2	0	0	0
	total	2283	4730	2590
data_DMD_m2_rep2	MYH1	413	944	339
	MYH2	62	162	41
	MYH4	1867	3674	2007
	MYH1-2	0	0	0
	total	2342	4780	2387
data_DMD_m3_rep1	MYH1	606	967	89
	MYH2	44	59	7
	MYH4	3031	3603	903
	MYH1-2	0	0	0
	total	3681	4629	999
data_DMD_m3_rep2	MYH1	809	1091	92
	MYH2	46	77	3
	MYH4	2990	3653	681
	MYH1-2	0	0	0
	total	3845	4821	776
data_DMD_m3_rep3	MYH1	712	869	70
	MYH2	47	84	1
	MYH4	2876	4013	1127
	MYH1-2	0	0	0
	total	3635	4966	1198

## Sheet: EDL
		Proximal	Central	Distal
data_WT_m1_rep1	MYH1	102	151	125
	MYH2	47	74	49
	MYH4	175	315	734
	MYH1-2	0	0	0
	total	324	540	908
data_WT_m1_rep2	MYH1	103	167	140
	MYH2	47	72	48
	MYH4	215	360	709
	MYH1-2	0	0	0
	total	365	599	897
data_WT_m1_rep3	MYH1	138	211	123
	MYH2	51	75	33
	MYH4	201	400	731
	MYH1-2	0	0	0
	total	390	686	887
data_WT_m2_rep1	MYH1	188	265	40
	MYH2	103	132	1
	MYH4	489	886	258
	MYH1-2	0	0	0
	total	780	1283	299
data_WT_m2_rep2	MYH1	190	272	28
	MYH2	99	120	1
	MYH4	470	926	238
	MYH1-2	0	0	0
	total	759	1318	267
data_WT_m3_rep1	MYH1	11	121	156
	MYH2	9	63	63
	MYH4	30	309	682
	MYH1-2	0	0	0
	total	50	493	901
data_WT_m3_rep2	MYH1	20	104	91
	MYH2	11	72	64
	MYH4	48	258	656
	MYH1-2	0	0	0
	total	79	434	811
data_WT_m3_rep3	MYH1	23	80	91
	MYH2	15	59	64
	MYH4	63	276	656
	MYH1-2	0	0	0
	total	101	415	811
data_Ctr_m1_rep1	MYH1	92	322	66
	MYH2	37	74	10
	MYH4	255	744	375
	MYH1-2	0	0	0
	total	384	1140	451
data_Ctr_m1_rep2	MYH1	102	293	89
	MYH2	41	71	12
	MYH4	300	727	429
	MYH1-2	0	0	0
	total	443	1091	530
data_Ctr_m1_rep3	MYH1	85	267	71
	MYH2	32	85	12
	MYH4	258	819	492
	MYH1-2	0	0	0
	total	375	1171	575
data_Ctr_m2_rep1	MYH1	11	169	248
	MYH2	8	77	120
	MYH4	24	328	666
	MYH1-2	0	0	0
	total	43	574	1034
data_Ctr_m2_rep2	MYH1	10	260	262
	MYH2	7	123	111
	MYH4	28	563	648
	MYH1-2	0	0	0
	total	45	946	1021
data_Ctr_m2_rep3	MYH1	16	171	281
	MYH2	10	78	110
	MYH4	39	381	583
	MYH1-2	0	0	0
	total	65	630	974
data_DMD_m1_rep1	MYH1	12	110	181
	MYH2	3	42	51
	MYH4	37	429	746
	MYH1-2	0	0	0
	total	52	581	978
data_DMD_m1_rep2	MYH1	18	146	226
	MYH2	4	46	49
	MYH4	34	419	709
	MYH1-2	0	0	0
	total	56	611	984
data_DMD_m2_rep1	MYH1	53	104	174
	MYH2	21	57	37
	MYH4	181	360	601
	MYH1-2	0	0	0
	total	255	521	812
data_DMD_m2_rep2	MYH1	42	155	138
	MYH2	11	66	50
	MYH4	112	499	707
	MYH1-2	0	0	0
	total	165	720	895
data_DMD_m2_rep3	MYH1	36	157	126
	MYH2	13	63	43
	MYH4	144	512	678
	MYH1-2	0	0	0
	total	193	732	847
data_DMD_m3_rep1	MYH1	49	149	79
	MYH2	14	34	33
	MYH4	176	428	671
	MYH1-2	0	0	0
	total	239	611	783
data_DMD_m3_rep2	MYH1	45	254	93
	MYH2	15	47	30
	MYH4	197	753	643
	MYH1-2	0	0	0
	total	257	1054	766
data_DMD_m3_rep3	MYH1	48	183	69
	MYH2	10	40	35
	MYH4	149	758	729
	MYH1-2	0	0	0
	total	207	981	833

## Sheet: SOL
		Proximal	Central	Distal
data_WT_m1_rep1	MYH1	2	28	41
	MYH2	83	434	334
	MYH4	47	209	166
	MYH1-2	0	0	0
	total	132	671	541
data_WT_m1_rep2	MYH1	2	30	41
	MYH2	93	443	373
	MYH4	47	213	163
	MYH1-2	0	0	0
	total	142	686	577
data_WT_m1_rep3	MYH1	2	25	47
	MYH2	99	447	354
	MYH4	59	223	161
	MYH1-2	0	0	0
	total	160	695	562
data_WT_m2_rep1	MYH1	3	74	48
	MYH2	47	501	339
	MYH4	43	318	202
	MYH1-2	0	0	0
	total	93	893	589
data_WT_m2_rep2	MYH1	3	81	71
	MYH2	59	509	308
	MYH4	45	318	191
	MYH1-2	0	0	0
	total	107	908	570
data_WT_m2_rep3	MYH1	4	84	71
	MYH2	64	522	313
	MYH4	53	315	187
	MYH1-2	0	0	0
	total	121	921	571
data_WT_m3_rep1	MYH1	2	43	36
	MYH2	111	484	330
	MYH4	100	356	209
	MYH1-2	0	0	0
	total	213	883	575
data_WT_m3_rep2	MYH1	0	47	53
	MYH2	117	487	410
	MYH4	105	348	254
	MYH1-2	0	0	0
	total	222	882	717
data_WT_m3_rep3	MYH1	1	47	43
	MYH2	129	493	399
	MYH4	129	361	237
	MYH1-2	0	0	0
	total	259	901	679
data_Ctr_m1_rep1	MYH1	0	0	0
	MYH2	228	545	361
	MYH4	105	270	163
	MYH1-2	0	0	0
	total	333	815	524
data_Ctr_m1_rep2	MYH1	0	0	0
	MYH2	220	550	403
	MYH4	101	272	177
	MYH1-2	0	0	0
	total	321	822	580
data_Ctr_m1_rep3	MYH1	0	0	0
	MYH2	232	560	359
	MYH4	107	276	160
	MYH1-2	0	0	0
	total	339	836	519
data_Ctr_m2_rep1	MYH1	6	52	89
	MYH2	53	354	253
	MYH4	78	287	161
	MYH1-2	0	0	0
	total	137	693	503
data_Ctr_m2_rep2	MYH1	7	57	128
	MYH2	67	369	519
	MYH4	80	293	332
	MYH1-2	0	0	0
	total	154	719	979
data_Ctr_m2_rep3	MYH1	6	55	74
	MYH2	87	392	242
	MYH4	91	314	132
	MYH1-2	0	0	0
	total	184	761	448
data_DMD_m1_rep1	MYH1	14	71	61
	MYH2	22	255	177
	MYH4	65	592	382
	MYH1-2	0	0	0
	total	101	918	620
data_DMD_m1_rep2	MYH1	16	68	107
	MYH2	19	256	198
	MYH4	74	599	495
	MYH1-2	0	0	0
	total	109	923	800
data_DMD_m1_rep3	MYH1	12	86	61
	MYH2	22	288	177
	MYH4	84	606	382
	MYH1-2	0	0	0
	total	118	980	620
data_DMD_m2_rep2	MYH1	3	48	65
	MYH2	64	292	247
	MYH4	115	388	242
	MYH1-2	0	0	0
	total	182	728	554
data_DMD_m2_rep3	MYH1	3	48	72
	MYH2	65	307	206
	MYH4	128	386	225
	MYH1-2	0	0	0
	total	196	741	503
data_DMD_m3_rep1	MYH1	28	185	109
	MYH2	59	362	213
	MYH4	84	397	171
	MYH1-2	0	0	0
	total	171	944	493
data_DMD_m3_rep2	MYH1	36	164	195
	MYH2	54	381	522
	MYH4	93	410	327
	MYH1-2	0	0	0
	total	183	955	1044
data_DMD_m3_rep3	MYH1	44	254	228
	MYH2	69	370	326
	MYH4	97	430	344
	MYH1-2	0	0	0
	total	210	1054	898
